# Supplementary material for: Methylation-driven gene DLL3 is a potential prognostic biomarker in ocular melanoma correlating with metastasis
Source: Front Oncol. 2022 Oct 20;12:964902. doi: 10.3389/fonc.2022.964902 (PMC9630341; doi:10.3389/fonc.2022.964902)
Supplement: Supplementary Table 2 — DEGs between metastatic UM samples and non-metastatic ones as well as DEGs between low and high DLL3 expression groups. [file Table_2.xlsx]

## Sheet: Metastasis vs. non-metastasis
	baseMean	log2FoldChange	lfcSE	stat	pvalue	padj	change	name
TSPAN6	1445.47	-0.898659	0.327476	-2.7442	0.0060659	0.291937	NoSig	TSPAN6
TNMD	0.0505164	-0.362093	5.29921	-0.0683297	0.945523	NA	NoSig	TNMD
DPM1	631.971	0.146572	0.243747	0.601328	0.547621	0.945449	NoSig	DPM1
SCYL3	399.946	0.0870853	0.21806	0.399364	0.689625	0.965269	NoSig	SCYL3
C1orf112	128.776	0.050251	0.246231	0.204081	0.838291	0.98646	NoSig	C1orf112
FGR	86.6894	-0.437112	0.664578	-0.657729	0.510712	0.942679	NoSig	FGR
CFH	292.402	-0.405607	0.613643	-0.660983	0.508623	0.942442	NoSig	CFH
FUCA2	3251.9	-0.165573	0.268594	-0.616445	0.537601	0.94386	NoSig	FUCA2
GCLC	857.176	0.0570147	0.319827	0.178267	0.858513	0.988815	NoSig	GCLC
NFYA	1494.33	0.121439	0.33025	0.367719	0.713083	0.970124	NoSig	NFYA
STPG1	613.049	-1.49777	0.433994	-3.45113	0.00055825	0.0898417	NoSig	STPG1
NIPAL3	1602.26	-1.29293	0.457471	-2.82625	0.00470961	0.262116	NoSig	NIPAL3
LAS1L	2494.51	0.00372293	0.204227	0.0182293	0.985456	0.998035	NoSig	LAS1L
ENPP4	46.1101	0.416145	0.732773	0.567905	0.5701	0.949513	NoSig	ENPP4
SEMA3F	290.551	-0.139976	0.44176	-0.31686	0.75135	0.978458	NoSig	SEMA3F
CFTR	2.51597	0.194529	1.69307	0.114897	0.908527	0.992401	NoSig	CFTR
ANKIB1	902.731	0.232721	0.409173	0.568759	0.56952	0.949513	NoSig	ANKIB1
CYP51A1	152.998	0.511553	0.489096	1.04592	0.2956	0.882263	NoSig	CYP51A1
KRIT1	610.06	0.382686	0.42383	0.902923	0.366567	0.904369	NoSig	KRIT1
RAD52	250.055	0.150816	0.421616	0.357709	0.720561	0.971512	NoSig	RAD52
MYH16	3.29689	-0.222577	0.620065	-0.358958	0.719627	0.971371	NoSig	MYH16
BAD	2600.54	0.0683632	0.371453	0.184043	0.85398	0.988567	NoSig	BAD
LAP3	2075.01	0.649813	0.499668	1.30049	0.193433	0.815272	NoSig	LAP3
CD99	11801.1	-0.637323	0.450299	-1.41533	0.156971	0.786744	NoSig	CD99
HS3ST1	19.6284	0.430015	0.543899	0.790615	0.429168	0.923633	NoSig	HS3ST1
AOC1	14.436	-1.46058	0.829844	-1.76007	0.0783956	0.678028	NoSig	AOC1
WNT16	0.65851	-1.44558	1.71711	-0.841864	0.399864	NA	NA	WNT16
HECW1	11.3446	2.26575	1.14909	1.97177	NA	NA	NA	HECW1
MAD1L1	5261.19	0.504152	0.532233	0.947238	0.343517	0.896092	NoSig	MAD1L1
LASP1	10288.9	-0.609669	0.389348	-1.56587	0.117379	0.752066	NoSig	LASP1
SNX11	998.284	-0.351977	0.28948	-1.21589	0.224025	0.839471	NoSig	SNX11
TMEM176A	689.934	-0.658612	0.707528	-0.930863	0.351925	0.899297	NoSig	TMEM176A
M6PR	3278.66	-0.227283	0.256431	-0.886331	0.375439	0.908939	NoSig	M6PR
KLHL13	147.615	-0.184115	0.51832	-0.355215	0.722429	0.971931	NoSig	KLHL13
CYP26B1	743.078	-0.492219	0.605878	-0.812407	0.416558	0.920903	NoSig	CYP26B1
ICA1	419.816	0.247535	0.447073	0.553679	0.579798	0.949701	NoSig	ICA1
DBNDD1	7908.99	-0.11473	0.468489	-0.244893	0.806539	0.983492	NoSig	DBNDD1
ALS2	1100.98	-0.273529	0.25461	-1.0743	0.282686	0.87609	NoSig	ALS2
CASP10	70.923	0.878661	0.467866	1.87802	0.0603787	0.62889	NoSig	CASP10
CFLAR	2040.36	0.26859	0.271135	0.990616	0.321873	0.89027	NoSig	CFLAR
TFPI	209.946	-1.1188	0.792782	-1.41123	0.158176	0.786744	NoSig	TFPI
NDUFAF7	445.815	0.0639496	0.300964	0.212482	0.831731	0.98576	NoSig	NDUFAF7
RBM5	2441.39	-0.147424	0.291792	-0.505238	0.613391	0.953876	NoSig	RBM5
MTMR7	18.6697	-0.203782	0.56679	-0.359537	0.719194	0.971371	NoSig	MTMR7
SLC7A2	574.427	-0.992514	0.622521	-1.59435	0.110858	0.740264	NoSig	SLC7A2
ARF5	5515.52	0.00282027	0.312849	0.00901478	0.992807	0.999398	NoSig	ARF5
SARM1	379.201	-0.168229	0.363201	-0.463184	0.643232	0.957549	NoSig	SARM1
POLDIP2	7374.76	-0.20762	0.318742	-0.651372	0.514806	0.943145	NoSig	POLDIP2
PLXND1	7675.11	-0.957989	0.468445	-2.04504	0.0408507	0.569049	NoSig	PLXND1
AK2	3898.46	-0.46294	0.260812	-1.77499	0.075899	0.674446	NoSig	AK2
CD38	70.948	1.76848	0.738933	2.39328	NA	NA	NA	CD38
FKBP4	8892.27	-0.180732	0.347112	-0.520673	0.602594	0.952731	NoSig	FKBP4
KDM1A	3060.17	-0.523736	0.323513	-1.6189	0.105468	0.734792	NoSig	KDM1A
RBM6	1607.07	-0.456729	0.387841	-1.17762	0.238948	0.850919	NoSig	RBM6
CAMKK1	541.259	0.105802	0.259994	0.40694	0.684052	0.964414	NoSig	CAMKK1
RECQL	299.96	0.649733	0.658631	0.98649	0.323893	0.891088	NoSig	RECQL
VPS50	530.503	0.432181	0.391586	1.10367	0.269738	0.867102	NoSig	VPS50
HSPB6	864.438	-1.0129	0.946303	-1.07038	0.284448	0.876737	NoSig	HSPB6
ARHGAP33	135.227	-0.552502	0.423492	-1.30463	0.192018	0.814656	NoSig	ARHGAP33
NDUFAB1	1907.12	0.154537	0.187462	0.824367	0.409731	0.918699	NoSig	NDUFAB1
PDK4	1160.22	-0.591251	0.983563	-0.601132	0.547752	0.945449	NoSig	PDK4
SLC22A16	1.96134	0.420082	1.04198	0.403157	NA	NA	NoSig	SLC22A16
ZMYND10	29.5851	-0.960029	0.537935	-1.78466	0.0743169	0.668969	NoSig	ZMYND10
ABCB5	7634.26	-0.311735	0.306118	-1.01835	0.308512	0.885314	NoSig	ABCB5
ARX	469.911	1.22131	1.57909	0.773426	0.439271	0.926227	NoSig	ARX
SLC25A13	1818.45	0.417718	0.260416	1.60404	0.108704	0.737976	NoSig	SLC25A13
ST7	1897.56	-0.119331	0.292325	-0.408211	0.683119	0.9644	NoSig	ST7
CDC27	1230.26	0.3561	0.389839	0.913453	0.361004	0.903682	NoSig	CDC27
SLC4A1	0.76028	-0.779791	1.49081	-0.523065	0.600929	NA	NA	SLC4A1
CALCR	3.51372	0.0414628	1.12886	0.0367299	0.9707	0.99798	NoSig	CALCR
HCCS	791.884	-0.0129775	0.176728	-0.0734318	0.941463	0.99592	NoSig	HCCS
DVL2	2599.48	-0.53888	0.279588	-1.92741	0.053929	0.608244	NoSig	DVL2
PRSS22	0.532295	0.373989	1.54975	0.241321	0.809306	NA	NoSig	PRSS22
UPF1	6261.27	-0.170577	0.239543	-0.712094	0.476407	0.93623	NoSig	UPF1
SKAP2	112.176	0.375306	0.553094	0.678557	0.497419	0.940931	NoSig	SKAP2
SLC25A5	16420.3	0.170702	0.258055	0.661494	0.508295	0.942442	NoSig	SLC25A5
MCUB	285.586	1.24395	0.628303	1.97985	0.0477202	0.58725	NoSig	MCUB
HOXA11	27.4661	-1.1445	1.44263	-0.793342	0.427578	0.92299	NoSig	HOXA11
POLR2J	2025.28	0.31063	0.321574	0.965966	0.334061	0.894562	NoSig	POLR2J
DHX33	1160.22	0.0190284	0.227635	0.0835917	0.933381	0.995459	NoSig	DHX33
MEOX1	17.15	-1.54822	1.07618	-1.43862	0.150259	0.781435	NoSig	MEOX1
THSD7A	25.258	-0.268365	0.72226	-0.371563	0.710219	0.969611	NoSig	THSD7A
LIG3	1459.95	0.286696	0.365023	0.785418	0.432208	0.924789	NoSig	LIG3
RPAP3	401.771	0.337398	0.44511	0.758009	0.448446	0.929019	NoSig	RPAP3
ACSM3	39.223	-0.259539	0.687	-0.377786	0.70559	0.968517	NoSig	ACSM3
REXO5	101.345	-0.375199	0.396217	-0.946955	0.343662	0.896092	NoSig	REXO5
CIAPIN1	2221.53	-0.126446	0.222612	-0.56801	0.570028	0.949513	NoSig	CIAPIN1
SPPL2B	2190.32	-0.196108	0.292712	-0.669969	0.502877	0.941586	NoSig	SPPL2B
FAM214B	914.297	0.300501	0.250778	1.19827	0.23081	0.843961	NoSig	FAM214B
COPZ2	567.635	-0.388441	0.455368	-0.853026	0.393645	0.913674	NoSig	COPZ2
PRKAR2B	110.735	0.48454	0.547503	0.885001	0.376156	0.909333	NoSig	PRKAR2B
MSL3	591.487	0.00569468	0.274158	0.0207715	0.983428	0.99798	NoSig	MSL3
CREBBP	5736.65	-0.141065	0.220488	-0.639785	0.522313	0.943248	NoSig	CREBBP
TSPOAP1	653.542	-0.73098	0.347591	-2.10299	0.0354669	0.551244	NoSig	TSPOAP1
MPO	22.6274	-0.963523	0.71643	-1.34489	0.178659	0.800651	NoSig	MPO
PON1	2.00994	-3.62504	1.75783	-2.06223	0.0391862	0.56585	NoSig	PON1
GCFC2	666.962	0.33186	0.363666	0.91254	0.361485	0.903682	NoSig	GCFC2
WDR54	558.676	-0.559102	0.446566	-1.252	0.210568	0.83124	NoSig	WDR54
CROT	271.677	-0.424794	0.360249	-1.17917	0.238331	0.849872	NoSig	CROT
ABCB4	162.203	1.50649	0.773351	1.948	0.051415	0.599396	NoSig	ABCB4
KMT2E	2114.83	0.218203	0.277762	0.785575	0.432116	0.924789	NoSig	KMT2E
RHBDD2	6148.07	0.0966666	0.397009	0.243487	0.807628	0.983492	NoSig	RHBDD2
SOX8	2195.28	-0.0817632	0.620166	-0.131841	0.89511	0.991023	NoSig	SOX8
IBTK	919.886	0.0776969	0.422531	0.183884	0.854104	0.98861	NoSig	IBTK
ZNF195	331.551	-0.0683441	0.460893	-0.148286	0.882117	0.990625	NoSig	ZNF195
MYCBP2	2537.09	0.198939	0.33382	0.595947	0.55121	0.945772	NoSig	MYCBP2
FBXL3	520.223	0.163691	0.450332	0.363489	0.716239	0.971283	NoSig	FBXL3
ITGAL	336.915	0.544505	0.91583	0.594549	0.552145	0.945898	NoSig	ITGAL
PDK2	1640.25	-0.907444	0.407489	-2.22692	0.0259529	0.506672	NoSig	PDK2
ITGA3	10983.9	-0.409934	0.529259	-0.774542	0.43861	0.926017	NoSig	ITGA3
ZFX	740.513	0.113907	0.384283	0.296413	0.766915	0.980568	NoSig	ZFX
LAMP2	7003.88	0.0638977	0.214796	0.297481	0.7661	0.980568	NoSig	LAMP2
ITGA2B	23.5408	-0.272034	0.592577	-0.459069	0.646185	0.958009	NoSig	ITGA2B
ASB4	2.22667	-0.026863	1.14688	-0.0234226	0.981313	0.99798	NoSig	ASB4
GDE1	1975.09	0.0454882	0.209746	0.216873	0.828307	0.985436	NoSig	GDE1
REX1BD	1869.9	0.148845	0.316133	0.470831	0.637761	0.956844	NoSig	REX1BD
CRLF1	160.962	0.762734	0.629429	1.21179	0.225594	0.841902	NoSig	CRLF1
OSBPL7	681.676	-0.840876	0.341316	-2.46363	0.0137539	0.397881	NoSig	OSBPL7
TMEM98	7959.66	-0.138501	0.294386	-0.470475	0.638016	0.956877	NoSig	TMEM98
YBX2	56.0823	0.326689	0.576908	0.566275	0.571207	0.949525	NoSig	YBX2
KRT33A	0.0782819	-0.362094	4.87625	-0.0742566	0.940806	NA	NoSig	KRT33A
MAP3K14	666.243	0.289297	0.291179	0.993535	0.320449	0.890144	NoSig	MAP3K14
ABCC8	11.1212	0.00970417	1.2344	0.00786142	0.993728	0.999566	NoSig	ABCC8
CACNG3	3.26611	-2.94448	1.96302	-1.49997	0.133621	0.772549	NoSig	CACNG3
TMEM132A	762.178	-0.758827	0.582174	-1.30344	0.192426	0.814656	NoSig	TMEM132A
AP2B1	11066.8	-0.0322785	0.230272	-0.140176	0.888521	0.990984	NoSig	AP2B1
TAC1	3.57023	-1.26041	1.47042	-0.857181	0.391345	0.913674	NoSig	TAC1
ZNF263	1225.01	-0.0433592	0.168836	-0.256812	0.797324	0.982993	NoSig	ZNF263
CX3CL1	717.445	-0.498541	0.497187	-1.00272	0.315994	0.887675	NoSig	CX3CL1
SPATA20	12052.6	0.117863	0.427877	0.27546	0.782963	0.982068	NoSig	SPATA20
CACNA1G	7.0956	-1.40025	1.09286	-1.28127	0.200098	0.823504	NoSig	CACNA1G
TNFRSF12A	552.625	-0.352157	0.598834	-0.588071	0.556484	0.94648	NoSig	TNFRSF12A
DLX6	3.09099	-0.524778	0.941526	-0.557369	0.577275	0.949701	NoSig	DLX6
MAP3K9	287.101	-1.02534	0.309167	-3.31646	0.000911665	0.119768	NoSig	MAP3K9
RALA	1292.92	0.0942205	0.190983	0.493345	0.621769	0.954849	NoSig	RALA
BAIAP2L1	2427.37	-0.110408	0.311403	-0.354552	0.722925	0.971931	NoSig	BAIAP2L1
KDM7A	413.612	0.879862	0.451169	1.95018	0.0511545	0.598008	NoSig	KDM7A
ETV1	583.605	0.171352	0.664411	0.2579	0.796484	0.982673	NoSig	ETV1
AGK	1039.97	0.143259	0.149331	0.95934	0.337388	0.894562	NoSig	AGK
ALDH3B1	3675.73	-0.872427	0.515785	-1.69146	0.0907499	0.705068	NoSig	ALDH3B1
TTC22	9.14392	-0.067726	0.949797	-0.0713058	0.943154	0.99592	NoSig	TTC22
PHTF2	270.883	0.389499	0.506985	0.768265	0.44233	0.927314	NoSig	PHTF2
CCL26	9.21202	-0.0498276	0.738843	-0.0674401	0.946231	0.995992	NoSig	CCL26
FARP2	2994.26	-0.0747145	0.277396	-0.269343	0.787666	0.982068	NoSig	FARP2
USH1C	16.5365	-0.562741	1.21217	-0.464242	0.642475	0.957549	NoSig	USH1C
GGCT	1384.28	0.245068	0.237955	1.02989	0.303061	0.88423	NoSig	GGCT
DBF4	152.39	0.444364	0.493473	0.900483	0.367864	0.904369	NoSig	DBF4
TBXA2R	182.417	0.356533	0.563502	0.632708	0.526924	0.943248	NoSig	TBXA2R
IFRD1	1024.19	0.0372478	0.426722	0.0872882	0.930442	0.995162	NoSig	IFRD1
LGALS14	0.117487	0.132938	4.67595	0.0284301	0.977319	NA	NoSig	LGALS14
COX10	581.122	0.127704	0.177431	0.71974	0.471685	0.935901	NoSig	COX10
GTF2IRD1	1911.29	-0.487278	0.330712	-1.47342	0.140638	0.7762	NoSig	GTF2IRD1
PAF1	4458.77	0.0218649	0.238847	0.0915438	0.927061	0.993933	NoSig	PAF1
VPS41	3002.51	0.307657	0.259905	1.18373	0.23652	0.847431	NoSig	VPS41
ARHGAP44	95.5914	-0.515941	0.485039	-1.06371	0.28746	0.879137	NoSig	ARHGAP44
ELAC2	4347.78	-0.0437572	0.259228	-0.168798	0.865955	0.989237	NoSig	ELAC2
SCIN	2402.37	-0.789199	1.45184	-0.543585	0.586727	0.950973	NoSig	SCIN
ARSD	3544.21	0.207227	0.275611	0.751881	0.452122	0.929424	NoSig	ARSD
PNPLA4	1365.28	0.271005	0.356361	0.760478	0.446969	0.928675	NoSig	PNPLA4
MYH13	0.167466	-0.701277	3.39311	-0.206677	0.836262	NA	NA	MYH13
ADIPOR2	7311.97	-0.0683351	0.247256	-0.276374	0.782261	0.982068	NoSig	ADIPOR2
CDKL3	21.8525	-0.0457506	0.387141	-0.118176	0.905929	0.991877	NoSig	CDKL3
UPP2	1.09093	-1.40345	1.13846	-1.23276	0.217665	NA	NA	UPP2
PRSS21	16.5516	1.3121	1.63982	0.800149	0.423624	0.922433	NoSig	PRSS21
MARK4	4540.84	-0.473767	0.385566	-1.22876	0.219163	0.837396	NoSig	MARK4
PROM1	35.9462	-0.268822	0.905938	-0.296734	0.76667	0.980568	NoSig	PROM1
CCDC124	5381.54	-0.296138	0.38799	-0.763262	0.445307	0.928482	NoSig	CCDC124
CEACAM21	14.8403	0.53469	0.760453	0.703121	0.48198	0.936965	NoSig	CEACAM21
PAFAH1B1	4412.38	0.359511	0.294894	1.21912	0.222799	0.838355	NoSig	PAFAH1B1
NOS2	45.5831	-0.49501	0.524636	-0.943529	0.34541	0.896635	NoSig	NOS2
DNAH9	8.73087	-1.94991	0.710391	-2.74485	0.00605392	0.291937	NoSig	DNAH9
KIAA0100	9394.02	-0.0520246	0.270014	-0.192674	0.847214	0.98718	NoSig	KIAA0100
SLC13A2	0.176424	-0.704916	2.67471	-0.263548	0.792128	NA	NA	SLC13A2
GAS7	1959.52	-0.412281	0.433962	-0.950039	0.342092	0.895693	NoSig	GAS7
TRAPPC6A	1900.64	-0.141645	0.415124	-0.34121	0.732945	0.974576	NoSig	TRAPPC6A
MATK	731.317	0.680214	1.01388	0.670905	0.502281	0.941586	NoSig	MATK
CEACAM7	0.300973	-1.05919	4.21023	-0.251576	0.801368	NA	NA	CEACAM7
CD79B	1520.9	0.320486	0.622341	0.514968	0.606576	0.952731	NoSig	CD79B
SCN4A	23.5443	0.562768	0.612774	0.918394	0.358413	0.90275	NoSig	SCN4A
ST7L	596.056	0.0596453	0.269058	0.221682	0.824561	0.984604	NoSig	ST7L
TKTL1	70.4687	-0.743686	0.955304	-0.778481	0.436285	0.925538	NoSig	TKTL1
PAX6	123.373	-0.41907	0.691998	-0.605594	0.544784	0.945449	NoSig	PAX6
RPUSD1	2265.87	-0.371771	0.446666	-0.832325	0.405226	0.916891	NoSig	RPUSD1
RHBDF1	1815.39	-0.181207	0.343707	-0.527214	0.598045	0.952731	NoSig	RHBDF1
LUC7L	1573.25	0.103085	0.309797	0.332749	0.739324	0.975383	NoSig	LUC7L
CACNA2D2	581.59	-0.293677	0.438234	-0.670138	0.50277	0.941586	NoSig	CACNA2D2
BAIAP3	950.742	-0.42053	0.621548	-0.676586	0.498669	0.940996	NoSig	BAIAP3
TSR3	4025.94	-0.28122	0.387046	-0.726579	0.467484	0.934111	NoSig	TSR3
PIGQ	5227.23	-0.532358	0.377963	-1.40849	0.158986	0.786947	NoSig	PIGQ
CRAMP1	614.046	-0.327453	0.178332	-1.8362	0.0663285	0.643125	NoSig	CRAMP1
TEAD3	1278.6	-1.02104	0.357847	-2.85329	0.00432685	0.24929	NoSig	TEAD3
SELE	4.15297	0.307208	0.905583	0.339238	0.734431	0.974882	NoSig	SELE
DNAJC11	1931.97	-0.295442	0.301817	-0.978877	0.327641	0.89234	NoSig	DNAJC11
FMO3	64.9583	-0.0152811	0.73978	-0.0206562	0.98352	0.99798	NoSig	FMO3
MYLIP	2089.17	-0.731349	0.397213	-1.8412	0.0655918	0.640687	NoSig	MYLIP
NOX1	27.6688	0.402013	0.33203	1.21077	0.225983	0.84208	NoSig	NOX1
E2F2	70.3215	-0.235538	0.521774	-0.451417	0.651689	0.96003	NoSig	E2F2
PSMB1	4989.79	-0.0713754	0.240161	-0.297199	0.766315	0.980568	NoSig	PSMB1
SYN1	121.868	-2.13032	0.83386	-2.55476	0.010626	0.357644	NoSig	SYN1
JARID2	1813.13	-0.92258	0.404024	-2.28348	0.022402	0.481685	NoSig	JARID2
CDKL5	182.762	-0.256662	0.357799	-0.717336	0.473167	0.935901	NoSig	CDKL5
CAMK1G	53.6295	0.0179559	0.692221	0.0259395	0.979306	0.99798	NoSig	CAMK1G
CDK11A	201.733	-0.574378	0.225576	-2.54627	0.0108881	0.360563	NoSig	CDK11A
NADK	1793.87	0.211701	0.26283	0.805467	0.42055	0.921897	NoSig	NADK
TFAP2B	3.932	-3.21774	1.7365	-1.853	0.0638819	0.638345	NoSig	TFAP2B
TFAP2D	0.0610935	-0.418667	5.65541	-0.0740294	0.940987	NA	NoSig	TFAP2D
DLEC1	35.8987	-0.890661	0.622084	-1.43174	0.152219	0.784237	NoSig	DLEC1
CYTH3	2625.37	0.545094	0.234481	2.32469	0.0200888	0.459731	NoSig	CYTH3
ADAM22	53.5696	0.279639	0.538179	0.519601	0.603341	0.952731	NoSig	ADAM22
SYPL1	2696.88	0.180414	0.176597	1.02162	0.306962	0.884759	NoSig	SYPL1
CYB561	1253.28	-0.310718	0.30404	-1.02197	0.306797	0.884759	NoSig	CYB561
SPAG9	4046.38	0.230846	0.350126	0.659322	0.509689	0.942442	NoSig	SPAG9
CELSR3	70.9294	-1.26378	0.491292	-2.57236	0.0101009	0.353799	NoSig	CELSR3
AASS	330.839	0.462174	0.451185	1.02436	0.305667	0.884649	NoSig	AASS
PLEKHG6	13.5722	0.505368	0.679626	0.743598	0.45712	0.930968	NoSig	PLEKHG6
SS18L2	442.604	-0.18807	0.251925	-0.746529	0.455348	0.929735	NoSig	SS18L2
MPND	1702.93	-0.272557	0.381245	-0.714914	0.474662	0.93623	NoSig	MPND
MGST1	458.455	0.415961	0.716678	0.580402	0.561644	0.947615	NoSig	MGST1
CRY1	381.086	-0.172829	0.376577	-0.458947	0.646272	0.958009	NoSig	CRY1
PGLYRP1	0.848217	-1.86541	1.33535	-1.39695	0.162429	NA	NA	PGLYRP1
NFIX	10826.7	-0.387327	0.41895	-0.92452	0.355216	0.901202	NoSig	NFIX
ST3GAL1	12077.1	1.01263	0.427335	2.36963	0.0178057	0.437489	NoSig	ST3GAL1
MMP25	44.981	-0.113888	0.913027	-0.124737	0.900732	0.991203	NoSig	MMP25
IL32	371.21	0.820515	0.853673	0.961158	0.336472	0.894562	NoSig	IL32
PKD1	3865.22	-0.643044	0.308315	-2.08567	0.0370084	0.559174	NoSig	PKD1
MAPK8IP2	5631.19	-0.851363	0.544515	-1.56352	0.117929	0.754094	NoSig	MAPK8IP2
MED24	5401.96	-0.304621	0.354231	-0.859948	0.389817	0.913354	NoSig	MED24
RHOBTB2	2998.37	-0.941981	0.448264	-2.1014	0.0356061	0.552147	NoSig	RHOBTB2
HEATR5B	1165.62	-0.0098786	0.222801	-0.0443382	0.964635	0.99798	NoSig	HEATR5B
SEC62	1737.23	-0.0952767	0.349099	-0.272922	0.784913	0.982068	NoSig	SEC62
RPS20	97177	0.624074	0.244234	2.55523	0.0106118	0.357644	NoSig	RPS20
CSDE1	16527.4	-0.164303	0.307419	-0.53446	0.593023	0.952731	NoSig	CSDE1
UBE3C	1689.11	0.265105	0.263266	1.00699	0.313942	0.887293	NoSig	UBE3C
REV3L	1405.96	0.26828	0.445585	0.602085	0.547118	0.945449	NoSig	REV3L
TENM1	5.78231	0.331313	0.990008	0.334657	0.737884	0.975207	NoSig	TENM1
PAX7	1.83321	-3.56305	1.62049	-2.19875	0.0278956	NA	NA	PAX7
MASP2	18.4495	-0.436646	0.838999	-0.520437	0.602759	0.952731	NoSig	MASP2
IYD	0.361248	-0.413461	2.13285	-0.193854	0.84629	NA	NoSig	IYD
FAM76A	195.889	-0.0578755	0.334726	-0.172904	0.862727	0.989237	NoSig	FAM76A
TRAF3IP3	52.916	0.742333	0.91373	0.812421	0.41655	0.920903	NoSig	TRAF3IP3
POMT2	1375.54	-0.454254	0.233312	-1.94698	0.0515372	0.599599	NoSig	POMT2
VTA1	885.913	-0.0429808	0.256946	-0.167275	0.867153	0.989237	NoSig	VTA1
MLXIPL	16.2335	0.16298	0.654607	0.248973	0.803382	0.983344	NoSig	MLXIPL
BAZ1B	2752.63	0.236283	0.16312	1.44852	0.147472	0.778597	NoSig	BAZ1B
RANBP9	1535.68	-0.175483	0.281278	-0.623877	0.532709	0.943248	NoSig	RANBP9
ETV7	211.983	1.00508	0.995519	1.0096	0.312686	0.886498	NoSig	ETV7
SPRTN	255.456	0.216373	0.298695	0.724396	0.468823	0.934966	NoSig	SPRTN
EEF1AKNMT	1986.25	-0.353546	0.276835	-1.2771	0.201567	0.824872	NoSig	EEF1AKNMT
DYRK4	895.562	0.086694	0.223883	0.387229	0.698587	0.966536	NoSig	DYRK4
ZNF207	4805.57	0.161639	0.166683	0.96974	0.332176	0.893866	NoSig	ZNF207
UQCRC1	10151.5	-0.389787	0.404433	-0.963787	0.335153	0.894562	NoSig	UQCRC1
STARD3NL	1162.42	0.105955	0.22761	0.465511	0.641566	0.95743	NoSig	STARD3NL
CD9	755.236	0.465078	0.488608	0.951843	0.341177	0.895664	NoSig	CD9
HHATL	9606.93	0.801204	1.45158	0.551953	0.58098	0.950336	NoSig	HHATL
NCAPD2	2412.04	-0.407499	0.270819	-1.50469	0.132403	0.768837	NoSig	NCAPD2
IFFO1	1371.94	-0.019486	0.264651	-0.0736291	0.941305	0.99592	NoSig	IFFO1
GIPR	17.1064	-0.340793	0.720173	-0.47321	0.636063	0.956742	NoSig	GIPR
PHF7	157.557	-0.0639469	0.3716	-0.172085	0.863371	0.989237	NoSig	PHF7
SEMA3G	98.3183	-0.0700467	0.446598	-0.156845	0.875367	0.989927	NoSig	SEMA3G
NISCH	4189.73	-0.821419	0.341375	-2.40621	0.0161191	0.423859	NoSig	NISCH
STAB1	1782.28	-0.531932	0.511281	-1.04039	0.298159	0.882655	NoSig	STAB1
FUZ	1862.21	-0.144548	0.378202	-0.382198	0.702315	0.967471	NoSig	FUZ
SLC6A13	27.6421	-0.912106	1.26866	-0.71895	0.472172	0.935901	NoSig	SLC6A13
IDS	1870.27	0.306014	0.25575	1.19654	0.231487	0.843961	NoSig	IDS
PRSS3	1.51171	-0.922142	1.13468	-0.812692	0.416395	NA	NA	PRSS3
ZNF200	265.003	0.077394	0.238492	0.324514	0.745549	0.976855	NoSig	ZNF200
CD4	1294.73	-0.398365	0.567632	-0.701802	0.482803	0.937358	NoSig	CD4
LRRC23	534.949	-0.552271	0.360776	-1.53078	0.125823	0.758431	NoSig	LRRC23
BTK	93.9718	0.258625	0.471998	0.547937	0.583735	0.950484	NoSig	BTK
HFE	187.944	-2.30794	0.736208	-3.1349	0.00171911	0.167673	NoSig	HFE
SCMH1	2996.81	-0.567006	0.307807	-1.84208	0.0654636	0.640687	NoSig	SCMH1
FYN	3521.62	-0.869813	0.456003	-1.90747	0.0564597	0.614661	NoSig	FYN
HIVEP2	781.888	0.182386	0.32593	0.559585	0.575762	0.949525	NoSig	HIVEP2
FMO1	5.46897	0.843955	0.794485	1.06227	0.288115	0.879384	NoSig	FMO1
ELOA	1979.64	-0.150847	0.243725	-0.618922	0.535968	0.94386	NoSig	ELOA
LYPLA2	5144.03	-0.432279	0.412094	-1.04898	0.294187	0.882021	NoSig	LYPLA2
CLCN6	1735.73	-0.371512	0.337818	-1.09974	0.271446	0.868935	NoSig	CLCN6
MRC2	1253.03	1.8897	0.707014	2.67279	0.00752233	0.3117	NoSig	MRC2
NME1-NME2	52.5999	-0.0976264	0.599315	-0.162897	0.8706	0.989269	NoSig	NME1-NME2
SLC6A7	1.95431	-0.234375	1.10401	-0.212295	0.831877	0.985823	NoSig	SLC6A7
TSPAN9	3884.29	-0.182221	0.276319	-0.659457	0.509602	0.942442	NoSig	TSPAN9
BTBD7	946.197	0.0711622	0.215923	0.329572	0.741724	0.97626	NoSig	BTBD7
APBA3	743.987	-0.060396	0.284075	-0.212605	0.831635	0.985718	NoSig	APBA3
MKS1	757.798	-0.520038	0.253367	-2.05251	0.0401202	0.567555	NoSig	MKS1
ABHD5	173.466	-0.338764	0.241946	-1.40016	0.161465	0.78739	NoSig	ABHD5
ANOS1	132.925	0.480337	0.473769	1.01386	0.310647	0.885413	NoSig	ANOS1
AKAP8L	2146.53	-0.438925	0.287335	-1.52757	0.12662	0.758431	NoSig	AKAP8L
MBTD1	444.544	-0.0372628	0.393902	-0.0945992	0.924633	0.993572	NoSig	MBTD1
UTP18	1533.94	0.128073	0.233122	0.549381	0.582744	0.950484	NoSig	UTP18
RNF216	3158.04	0.167957	0.188705	0.890052	0.373438	0.908009	NoSig	RNF216
TTC19	1413.43	0.244257	0.287348	0.850041	0.395303	0.91414	NoSig	TTC19
PTBP1	14771.9	-0.0730943	0.290228	-0.251851	0.801156	0.983058	NoSig	PTBP1
DPF1	28.4648	-1.15106	0.475458	-2.42095	0.0154798	0.42087	NoSig	DPF1
SYT7	424.246	-1.15256	0.512338	-2.2496	0.0244743	0.498819	NoSig	SYT7
LARS2	763.295	-0.413122	0.310518	-1.33043	0.183378	0.805471	NoSig	LARS2
PIK3C2A	2571.12	1.26282	0.684846	1.84395	0.0651909	0.640687	NoSig	PIK3C2A
PLAUR	146.131	-0.00580997	0.435695	-0.013335	0.989361	0.998517	NoSig	PLAUR
ANLN	191.6	0.446265	0.571041	0.781494	0.434512	0.924886	NoSig	ANLN
WIZ	4055.54	-0.517977	0.352065	-1.47126	0.141222	0.776265	NoSig	WIZ
RABGAP1	1589.5	-0.109274	0.307218	-0.35569	0.722073	0.971813	NoSig	RABGAP1
DCN	216.531	-0.334953	0.796066	-0.420761	0.67393	0.96331	NoSig	DCN
QPCTL	1027.54	-0.0745595	0.303438	-0.245716	0.805902	0.983492	NoSig	QPCTL
PPP5C	3584.08	0.25027	0.207075	1.2086	0.226818	0.842211	NoSig	PPP5C
CEP68	1254.59	-0.202523	0.203334	-0.996011	0.319245	0.889739	NoSig	CEP68
MAP4K3	828.358	-0.122326	0.532582	-0.229684	0.818337	0.984147	NoSig	MAP4K3
ZBTB32	9.9204	0.272008	0.706697	0.3849	0.700311	0.966652	NoSig	ZBTB32
TYROBP	1570.54	-0.500673	0.633516	-0.790309	0.429348	0.923637	NoSig	TYROBP
TMEM159	869.69	0.306084	0.305448	1.00208	0.316304	0.887675	NoSig	TMEM159
GABRA3	7.01456	-0.854081	1.45277	-0.587898	0.556601	0.94648	NoSig	GABRA3
BRCA1	211.033	-0.261609	0.324174	-0.807003	0.419665	0.921897	NoSig	BRCA1
ERCC1	4636.6	-0.288824	0.381585	-0.756906	0.449106	0.929377	NoSig	ERCC1
CD22	211.165	-1.69066	0.817483	-2.06812	0.0386284	0.564556	NoSig	CD22
SEMA3B	1194.32	-2.51146	0.726606	-3.45642	0.000547398	0.0898417	NoSig	SEMA3B
MBTPS2	916.451	0.213494	0.272262	0.784147	0.432954	0.924815	NoSig	MBTPS2
PRICKLE3	679.995	-0.398301	0.382311	-1.04182	0.297493	0.882263	NoSig	PRICKLE3
LTF	33.2054	-0.871984	0.856854	-1.01766	0.308841	0.885314	NoSig	LTF
EXTL3	4762.03	-0.923878	0.389704	-2.37072	0.0177537	0.437489	NoSig	EXTL3
NR1H4	1.97342	-2.26384	1.38334	-1.63651	0.101734	0.731256	NoSig	NR1H4
ELOVL5	2349.49	0.0642158	0.325029	0.197569	0.843382	0.986578	NoSig	ELOVL5
ALOX5	72.7358	0.12984	0.642852	0.201974	0.839937	0.98646	NoSig	ALOX5
KDM5D	603.749	-2.81681	1.75252	-1.60729	0.107991	0.737976	NoSig	KDM5D
CALCOCO1	3988.37	-0.809909	0.361044	-2.24324	0.0248814	0.501275	NoSig	CALCOCO1
UBR7	1386.3	0.186645	0.185803	1.00453	0.315122	0.88766	NoSig	UBR7
MAP4K5	881.212	-0.0703287	0.347144	-0.202592	0.839454	0.98646	NoSig	MAP4K5
EHD3	889.052	0.207406	0.547039	0.379144	0.704581	0.968257	NoSig	EHD3
PSMC4	4340.27	-0.085248	0.261024	-0.326591	0.743977	0.976709	NoSig	PSMC4
MAN2B2	3818.77	-0.128096	0.25978	-0.493092	0.621948	0.954849	NoSig	MAN2B2
SLC7A14	2.56924	-1.92385	1.53826	-1.25067	0.211055	0.831889	NoSig	SLC7A14
CLDN11	20.8316	-0.484846	0.772821	-0.627372	0.530416	0.943248	NoSig	CLDN11
SLC25A39	7773.68	-0.213795	0.355199	-0.601902	0.547239	0.945449	NoSig	SLC25A39
MVP	13161.7	-0.10573	0.393219	-0.268882	0.78802	0.982068	NoSig	MVP
NUB1	1922.75	0.234687	0.198291	1.18355	0.236591	0.847431	NoSig	NUB1
PGM3	491.209	0.121678	0.401669	0.302932	0.761941	0.980069	NoSig	PGM3
RWDD2A	162.259	0.0465096	0.359356	0.129425	0.897021	0.991023	NoSig	RWDD2A
CLK1	1830.13	0.214762	0.569819	0.376894	0.706252	0.968517	NoSig	CLK1
POLR3B	586.769	0.209357	0.24958	0.838839	0.40156	0.916548	NoSig	POLR3B
ANGEL1	1544.41	-0.373785	0.317709	-1.1765	0.239394	0.851292	NoSig	ANGEL1
RNF14	2491.31	0.118891	0.231824	0.512849	0.608057	0.952731	NoSig	RNF14
DNASE1L1	1098.78	0.0915441	0.258499	0.354138	0.723236	0.97196	NoSig	DNASE1L1
DDX11	1001.9	-0.760346	0.52656	-1.44399	0.148743	0.781198	NoSig	DDX11
HEBP1	3518.21	-0.282332	0.32825	-0.860111	0.389728	0.913344	NoSig	HEBP1
GPRC5A	342.924	0.551384	0.75667	0.728698	0.466186	0.933392	NoSig	GPRC5A
MAMLD1	583.918	-0.0733833	0.588279	-0.124742	0.900728	0.991203	NoSig	MAMLD1
CD6	150.199	0.239118	0.669105	0.35737	0.720815	0.971512	NoSig	CD6
TACC3	809.698	0.0592337	0.37958	0.156051	0.875993	0.989927	NoSig	TACC3
UFL1	722.142	0.329102	0.455901	0.721872	0.470373	0.935731	NoSig	UFL1
POLA2	708.381	-0.0611715	0.224886	-0.272012	0.785613	0.982068	NoSig	POLA2
ZC3H3	3824.18	-0.0546742	0.414189	-0.132003	0.894982	0.991023	NoSig	ZC3H3
CAPN1	11218.1	-0.268971	0.407141	-0.660633	0.508848	0.942442	NoSig	CAPN1
ACP3	9.01087	-0.813125	1.21767	-0.667769	0.504281	0.941586	NoSig	ACP3
MDH1	6521.33	0.307735	0.259503	1.18586	0.235677	0.847111	NoSig	MDH1
SLC30A9	2043.01	0.240882	0.328012	0.73437	0.462723	0.933079	NoSig	SLC30A9
MTMR11	123.627	-0.887852	0.587981	-1.51	0.131043	0.766008	NoSig	MTMR11
COX15	1933.07	0.220621	0.197053	1.11961	0.262882	0.862806	NoSig	COX15
CCDC88C	520.005	-0.176963	0.31977	-0.553407	0.579985	0.949701	NoSig	CCDC88C
YAF2	233.716	-0.0545706	0.33776	-0.161566	0.871647	0.989484	NoSig	YAF2
ZMYND11	2368.77	0.124907	0.292316	0.427301	0.66916	0.962006	NoSig	ZMYND11
WAS	234.642	-0.0827817	0.616653	-0.134243	0.89321	0.991023	NoSig	WAS
DPEP1	7.96816	2.23584	1.08926	2.05263	0.0401087	0.567555	NoSig	DPEP1
BID	730.791	0.199011	0.204021	0.975444	0.32934	0.89253	NoSig	BID
MATR3	146.611	0.308684	0.613958	0.502777	0.615121	0.953876	NoSig	MATR3
NPC1L1	3.46402	-0.918715	1.22365	-0.750797	0.452775	0.929424	NoSig	NPC1L1
XYLT2	1944.85	-0.0892688	0.222916	-0.40046	0.688818	0.964986	NoSig	XYLT2
RGPD5	0.250016	0.45256	1.57673	0.287025	0.774093	NA	NoSig	RGPD5
STMN4	5.51631	-2.0535	1.60154	-1.28221	0.19977	0.822908	NoSig	STMN4
NUDCD3	5553.2	-0.129266	0.288752	-0.447673	0.654389	0.960361	NoSig	NUDCD3
ISL1	1.80882	-0.437023	1.47903	-0.295479	0.767628	NA	NoSig	ISL1
CHDH	103.805	-0.895732	0.583734	-1.53448	0.12491	0.758431	NoSig	CHDH
IL20RA	5.23911	-1.33757	1.21725	-1.09885	0.271832	0.868935	NoSig	IL20RA
CLCA1	0.242586	0.617074	2.42582	0.254377	0.799204	NA	NA	CLCA1
CLCA4	0.0825041	0.246091	3.67281	0.0670035	0.946579	NA	NoSig	CLCA4
GLT8D1	1221.72	0.119567	0.200774	0.595531	0.551489	0.945846	NoSig	GLT8D1
ATP2C1	2666.87	-0.550764	0.277643	-1.98371	0.0472881	0.58725	NoSig	ATP2C1
IGF1	12.0802	0.188707	0.640361	0.294689	0.768231	0.980731	NoSig	IGF1
SLC38A5	2171.13	-0.935898	1.16551	-0.802996	0.421977	0.921897	NoSig	SLC38A5
RALBP1	2321.57	0.0574581	0.189946	0.302498	0.762273	0.980205	NoSig	RALBP1
RUFY3	656.92	0.380849	0.434768	0.875982	0.38104	0.911013	NoSig	RUFY3
CNTN1	123.072	-2.44902	1.03597	-2.36398	0.01808	0.441616	NoSig	CNTN1
SLC11A1	76.1172	-1.23193	0.54395	-2.26479	0.0235253	0.492267	NoSig	SLC11A1
WWTR1	1045.01	1.20943	0.65244	1.85371	0.0637812	0.638175	NoSig	WWTR1
AGPS	1200.5	-0.00383336	0.294805	-0.0130031	0.989625	0.998599	NoSig	AGPS
ZNF806	1.12262	-0.437622	1.00349	-0.436102	0.662763	NA	NoSig	ZNF806
CXorf56	1069.83	0.120261	0.163492	0.735573	0.461991	0.933029	NoSig	CXorf56
ATP1A2	218.37	-0.181433	0.988024	-0.183632	0.854302	0.988617	NoSig	ATP1A2
TTC27	809.264	0.241034	0.24945	0.966265	0.333912	0.894562	NoSig	TTC27
ZNF582	94.4996	0.0860348	0.389716	0.220762	0.825277	0.984693	NoSig	ZNF582
VSIG2	2.48431	0.180887	0.730325	0.24768	0.804382	0.983492	NoSig	VSIG2
PHLDB1	7526.61	-0.0697973	0.381558	-0.182927	0.854855	0.988624	NoSig	PHLDB1
MARCO	85.1521	0.151479	1.00716	0.150401	0.880448	0.990531	NoSig	MARCO
CYP24A1	30.2476	0.940434	1.12406	0.83664	0.402795	0.916548	NoSig	CYP24A1
PRDM11	1327.25	-0.645747	0.305612	-2.11297	0.0346038	0.547327	NoSig	PRDM11
SYT13	42.1542	-1.34581	0.910035	-1.47886	0.139178	0.775202	NoSig	SYT13
SNAI2	3075.17	-0.913985	0.43323	-2.1097	0.0348842	0.548767	NoSig	SNAI2
CD74	47961.6	0.594193	0.760157	0.781672	0.434407	0.924886	NoSig	CD74
HGF	41.8491	-0.113077	0.622311	-0.181705	0.855814	0.988624	NoSig	HGF
ZRANB1	737.615	0.190632	0.291798	0.653302	0.513562	0.943145	NoSig	ZRANB1
NCDN	3247.14	-0.521077	0.345997	-1.50602	0.132063	0.768031	NoSig	NCDN
ADGRA2	1744.21	0.0592384	0.612457	0.0967226	0.922947	0.993572	NoSig	ADGRA2
CCT8L1P	0.211963	-0.301203	1.84583	-0.16318	0.870377	NA	NoSig	CCT8L1P
ZFP64	758.51	-0.17866	0.197021	-0.906809	0.364508	0.904055	NoSig	ZFP64
MNAT1	283.184	-0.015701	0.300629	-0.0522271	0.958348	0.99798	NoSig	MNAT1
SAMD4A	3856.25	0.486375	0.3686	1.31952	0.186996	0.809827	NoSig	SAMD4A
RUNX3	636.279	-1.27068	0.951723	-1.33513	0.181833	0.803349	NoSig	RUNX3
MRE11	554.647	0.118718	0.350974	0.338254	0.735172	0.97492	NoSig	MRE11
PLEKHB1	2037.08	0.0449769	0.534664	0.0841218	0.93296	0.995459	NoSig	PLEKHB1
SERPINB1	2225.3	0.218287	0.221531	0.985357	0.324449	0.891121	NoSig	SERPINB1
CYP3A43	1.02492	0.088263	1.08101	0.0816486	0.934926	NA	NoSig	CYP3A43
SLC7A9	3.11971	-0.848387	0.848364	-1.00003	0.317297	0.88792	NoSig	SLC7A9
SPAST	519.86	0.147141	0.447111	0.329092	0.742086	0.97626	NoSig	SPAST
NRXN3	18.8658	0.0244957	0.793005	0.0308897	0.975358	0.99798	NoSig	NRXN3
OSBPL5	1537.14	-0.547221	0.336845	-1.62455	0.104259	0.7339	NoSig	OSBPL5
AQR	1410.71	0.254549	0.21391	1.18999	0.234052	0.846855	NoSig	AQR
CPS1	477.709	-3.08356	1.0319	-2.98823	0.00280597	0.207705	NoSig	CPS1
C8B	0.0441424	-0.305518	5.65541	-0.0540222	0.956917	NA	NoSig	C8B
FHL1	1406.84	-0.103476	0.442789	-0.233692	0.815224	0.983492	NoSig	FHL1
RTF2	6263.8	-0.294535	0.253212	-1.16319	0.244751	0.8544	NoSig	RTF2
GABRA1	3.51516	-1.80353	1.38072	-1.30622	0.191477	0.814656	NoSig	GABRA1
NLRP2	105.163	-5.5597	1.45371	-3.82449	0.000131045	0.0468344	Down	NLRP2
SLC45A4	1322.29	0.212167	0.288558	0.735268	0.462177	0.933042	NoSig	SLC45A4
RNF10	7983.34	-0.227692	0.198406	-1.1476	0.251133	0.858429	NoSig	RNF10
ZNF839	382.192	-0.153004	0.211393	-0.723789	0.469195	0.934966	NoSig	ZNF839
ZDHHC6	889.245	0.183928	0.266559	0.690011	0.490187	0.939718	NoSig	ZDHHC6
GRAMD1B	235.477	-0.731439	0.513233	-1.42516	0.154111	0.785348	NoSig	GRAMD1B
RNH1	15379.4	-0.147689	0.360396	-0.409796	0.681955	0.9644	NoSig	RNH1
NDUFS1	3013.51	0.229875	0.342091	0.67197	0.501603	0.941586	NoSig	NDUFS1
RB1CC1	1463.16	0.251571	0.604771	0.415977	0.677427	0.964146	NoSig	RB1CC1
ERP44	2212.06	0.507225	0.234038	2.16728	0.0302135	0.530633	NoSig	ERP44
ALAS1	1803.46	-0.155236	0.244774	-0.6342	0.52595	0.943248	NoSig	ALAS1
BIRC3	86.1921	1.51523	0.898529	1.68634	NA	NA	NA	BIRC3
AKAP11	1023.87	0.243443	0.377786	0.644394	0.51932	0.943248	NoSig	AKAP11
GLRX2	206.913	0.576137	0.318738	1.80756	0.0706752	0.656836	NoSig	GLRX2
SNAPC1	165.526	0.216864	0.472758	0.458722	0.646434	0.958009	NoSig	SNAPC1
DERA	1949.74	-0.232494	0.234261	-0.992458	0.320974	0.89027	NoSig	DERA
STRAP	4028.14	0.213374	0.190918	1.11762	0.263729	0.862806	NoSig	STRAP
ABCC2	103.058	-2.40487	1.01075	-2.3793	0.0173453	0.43534	NoSig	ABCC2
DEF6	449.771	-0.100429	0.509271	-0.197202	0.84367	0.986668	NoSig	DEF6
PLEKHO1	782.209	0.404238	0.54124	0.746873	0.45514	0.929712	NoSig	PLEKHO1
GCLM	228.538	0.0296384	0.413968	0.0715959	0.942923	0.99592	NoSig	GCLM
UBR2	1650.92	0.172695	0.287725	0.600208	0.548368	0.945449	NoSig	UBR2
EHD2	2993.52	-0.15253	0.55886	-0.27293	0.784907	0.982068	NoSig	EHD2
DEPDC1	34.7969	0.260632	0.706909	0.368692	0.712357	0.970124	NoSig	DEPDC1
CCDC28A	590.895	-0.478502	0.337395	-1.41823	0.156125	0.785823	NoSig	CCDC28A
RRAGD	3957.48	-0.0994683	0.323733	-0.307254	0.75865	0.979991	NoSig	RRAGD
HSF2	381.969	-0.428154	0.334921	-1.27837	0.201118	0.824872	NoSig	HSF2
PHF20	1707.41	0.0404904	0.204857	0.197652	0.843318	0.986578	NoSig	PHF20
HSD17B6	15.554	-1.41872	0.593899	-2.38883	0.0169023	0.431496	NoSig	HSD17B6
NR1H3	1305.2	-0.0575158	0.421009	-0.136614	0.891336	0.990987	NoSig	NR1H3
TYMP	1721.9	0.620291	0.638554	0.971399	0.33135	0.893496	NoSig	TYMP
NCAPH2	3094.36	-0.450892	0.383538	-1.17561	0.23975	0.851292	NoSig	NCAPH2
TOMM34	2187.77	-0.264434	0.23217	-1.13897	0.254716	0.859975	NoSig	TOMM34
SEC63	3072.47	0.295333	0.34696	0.851202	0.394657	0.913737	NoSig	SEC63
KPNA6	2037.19	-0.373832	0.251014	-1.48929	0.136411	0.773493	NoSig	KPNA6
VIM	310570	-0.990524	0.49055	-2.01921	0.0434653	0.576614	NoSig	VIM
RTEL1-TNFRSF6B	65.7632	-0.369595	0.47602	-0.776428	0.437496	0.926017	NoSig	RTEL1-TNFRSF6B
FAS	340.405	0.209552	0.675964	0.310004	0.756558	0.979889	NoSig	FAS
RNASET2	1277.53	-0.0991742	0.348424	-0.284637	0.775923	0.982038	NoSig	RNASET2
CD44	132174	-0.0432459	0.285041	-0.151718	0.879409	0.990382	NoSig	CD44
KCNG1	390.566	-0.73174	0.399826	-1.83015	0.067228	0.647945	NoSig	KCNG1
AGPAT4	162.479	0.732031	0.691677	1.05834	0.289899	0.879582	NoSig	AGPAT4
SLAMF7	287.255	1.07229	1.02897	1.04211	NA	NA	NA	SLAMF7
BTN3A1	1579.56	0.626184	0.616053	1.01644	NA	NA	NA	BTN3A1
MIPEP	980.868	-0.0787895	0.210346	-0.374572	0.707979	0.968517	NoSig	MIPEP
PRKCH	1456.9	-0.544258	0.396215	-1.37364	0.169552	0.794246	NoSig	PRKCH
INSRR	3.21743	0.729555	1.0926	0.667722	0.504311	0.941586	NoSig	INSRR
IFNGR1	906.211	0.362497	0.422503	0.857976	0.390906	0.913674	NoSig	IFNGR1
B4GALT7	1945.11	-0.207221	0.259942	-0.797185	0.425344	0.922727	NoSig	B4GALT7
SH2D2A	134.392	0.240669	0.542965	0.44325	0.657585	0.960361	NoSig	SH2D2A
VRK2	322.278	0.282502	0.434918	0.649551	0.515982	0.943248	NoSig	VRK2
TNFRSF1B	866.844	0.570226	0.588991	0.968139	0.332975	0.894538	NoSig	TNFRSF1B
VEZT	597.595	0.322886	0.399675	0.807872	0.419164	0.921897	NoSig	VEZT
POU2F2	42.3585	0.433608	0.625971	0.692696	0.4885	0.939635	NoSig	POU2F2
BRD9	1593.46	0.101172	0.255128	0.396556	0.691695	0.965489	NoSig	BRD9
SNX1	4520.41	0.345049	0.221056	1.56091	0.118545	0.755367	NoSig	SNX1
TBPL1	227.467	-0.163729	0.317016	-0.516471	0.605526	0.952731	NoSig	TBPL1
ARNTL2	9.31799	1.65771	0.831989	1.99246	0.0463201	0.58481	NoSig	ARNTL2
BCLAF1	2377.78	0.188501	0.298784	0.630895	0.528109	0.943248	NoSig	BCLAF1
SLC39A9	3066.11	0.377481	0.237228	1.59122	0.11156	0.741994	NoSig	SLC39A9
ANK1	33.8769	-0.0882466	0.730015	-0.120883	0.903783	0.99174	NoSig	ANK1
IBSP	5.09603	0.540247	1.72626	0.312958	NA	NA	NA	IBSP
TFB1M	398.395	0.152001	0.301441	0.504248	0.614087	0.953876	NoSig	TFB1M
RABEP1	2300.75	0.409444	0.298831	1.37015	0.170639	0.795522	NoSig	RABEP1
HMGB3	628.27	0.327688	0.395904	0.827696	0.407843	0.918363	NoSig	HMGB3
NUP160	1481.78	0.216972	0.291992	0.743076	0.457436	0.931089	NoSig	NUP160
BAK1	1236.07	-0.0696498	0.355652	-0.195837	0.844738	0.986917	NoSig	BAK1
MUSK	0.0919543	-0.475246	4.11387	-0.115523	0.908031	NA	NoSig	MUSK
IKZF2	57.0155	0.0254916	0.612131	0.041644	0.966783	0.99798	NoSig	IKZF2
GRN	31927.7	-0.257612	0.469084	-0.549181	0.582881	0.950484	NoSig	GRN
FAM13B	1166.65	0.0949416	0.362119	0.262184	0.79318	0.982263	NoSig	FAM13B
ARHGAP31	903.305	-0.477023	0.4249	-1.12267	0.261577	0.861726	NoSig	ARHGAP31
CENPQ	98.4698	-0.00728798	0.473118	-0.0154041	0.98771	0.998275	NoSig	CENPQ
SARS1	7398.96	0.0309726	0.278138	0.111357	0.911333	0.992842	NoSig	SARS1
RANBP3	4791.99	-0.290492	0.291887	-0.995224	0.319628	0.890002	NoSig	RANBP3
ARID4A	375.882	0.302225	0.513166	0.588943	0.555899	0.94648	NoSig	ARID4A
EIPR1	1237	-0.276645	0.220256	-1.25601	0.209112	0.830055	NoSig	EIPR1
PNPLA6	5038.26	-0.558496	0.372764	-1.49826	0.134066	0.772635	NoSig	PNPLA6
IFT88	535.249	0.0936811	0.421795	0.222101	0.824235	0.984604	NoSig	IFT88
ALG1	1704.09	0.289005	0.339345	0.851657	0.394404	0.913737	NoSig	ALG1
ZCCHC8	639.12	0.0699859	0.229816	0.304531	0.760724	0.979991	NoSig	ZCCHC8
ABCF2	3394.87	0.081706	0.231085	0.353575	0.723657	0.972059	NoSig	ABCF2
CHPF2	2646.98	0.235575	0.310019	0.75987	0.447332	0.928767	NoSig	CHPF2
LRRC7	7.50994	-0.0644019	0.735009	-0.0876206	0.930178	0.995162	NoSig	LRRC7
FUT8	394.938	0.430582	0.380796	1.13074	0.258163	0.861068	NoSig	FUT8
UBA6	668.973	0.340406	0.43757	0.777946	0.436601	0.925865	NoSig	UBA6
GAB2	5724.87	-0.129256	0.369374	-0.349932	0.72639	0.9731	NoSig	GAB2
ATP6V0A1	11828.1	-0.756746	0.384242	-1.96945	0.0489011	0.593155	NoSig	ATP6V0A1
PIAS1	602.022	0.0492663	0.248289	0.198423	0.842714	0.986578	NoSig	PIAS1
SLC4A7	300.904	-0.312062	0.606216	-0.514771	0.606713	0.952731	NoSig	SLC4A7
APBA2	1779.05	-0.0967349	0.39773	-0.243218	0.807837	0.983492	NoSig	APBA2
MAP2K3	2530.72	0.046177	0.345083	0.133814	0.893549	0.991023	NoSig	MAP2K3
EFCAB1	250.263	-1.95711	1.24131	-1.57664	0.114878	0.747065	NoSig	EFCAB1
TMSB10	30687.1	0.0508073	0.330067	0.15393	0.877665	0.990113	NoSig	TMSB10
ASTE1	205.11	-0.534372	0.286039	-1.86818	0.0617373	0.632382	NoSig	ASTE1
RNF19A	907.089	0.913684	0.516055	1.77052	0.0766409	0.67579	NoSig	RNF19A
PEX3	197.068	0.213736	0.444904	0.480408	0.630937	0.955528	NoSig	PEX3
GABARAPL2	2748.06	-0.078175	0.225047	-0.347372	0.728312	0.973186	NoSig	GABARAPL2
MYOC	13.4224	-0.0249137	1.51237	-0.0164733	NA	NA	NoSig	MYOC
SH3YL1	550.756	-0.0312988	0.369846	-0.0846267	0.932558	0.995459	NoSig	SH3YL1
FAM136A	1420.96	0.0906479	0.198023	0.457766	0.647121	0.958094	NoSig	FAM136A
VCL	2492.5	-0.198977	0.238918	-0.832827	0.404942	0.91679	NoSig	VCL
DEPDC1B	44.7789	0.507322	0.564547	0.898636	0.368847	0.904369	NoSig	DEPDC1B
DAPK2	51.8652	-0.114066	0.465117	-0.24524	0.80627	0.983492	NoSig	DAPK2
NSMAF	2510.55	0.606602	0.392579	1.54517	0.122305	0.756261	NoSig	NSMAF
ADSS2	1149.09	-0.176069	0.298002	-0.590831	0.554634	0.946324	NoSig	ADSS2
STAP1	2.66221	1.67275	1.22303	1.36771	NA	NA	NA	STAP1
TIMP2	56192.1	-0.285247	0.371745	-0.767319	0.442892	0.927319	NoSig	TIMP2
RFC1	2163.2	0.0749625	0.304272	0.246367	0.805398	0.983492	NoSig	RFC1
TBC1D23	448.169	0.0248797	0.391712	0.0635152	0.949356	0.996654	NoSig	TBC1D23
CUL3	1376.77	0.289668	0.346551	0.83586	0.403234	0.916548	NoSig	CUL3
MYOM2	197.53	0.280854	0.529635	0.530277	0.59592	0.952731	NoSig	MYOM2
OTC	0.173886	-0.531824	2.92036	-0.182109	0.855497	NA	NA	OTC
CYP46A1	28.6002	-1.84154	0.63987	-2.87798	0.00400224	0.237159	NoSig	CYP46A1
AC118549.1	1630.65	-0.140962	0.370168	-0.380805	0.703348	0.967704	NoSig	AC118549.1
SLC18A1	0.363814	0.0939535	1.59915	0.058752	0.95315	NA	NoSig	SLC18A1
USP2	308.037	-0.439215	0.492498	-0.891811	0.372494	0.907155	NoSig	USP2
CASR	2.41227	-3.19008	2.29592	-1.38946	0.164694	0.789652	NoSig	CASR
TUBG2	951.784	-0.160986	0.327581	-0.491437	0.623117	0.955171	NoSig	TUBG2
RPL26L1	673.012	0.406443	0.246343	1.6499	0.0989628	0.725276	NoSig	RPL26L1
FLT4	295.523	-0.302522	0.409668	-0.738457	0.460236	0.931757	NoSig	FLT4
NSUN2	2470.89	0.0470664	0.149954	0.313873	0.753617	0.979403	NoSig	NSUN2
FBXO42	1051.41	-0.13973	0.229658	-0.608428	0.542903	0.94517	NoSig	FBXO42
MFAP3	282.464	0.190011	0.398266	0.477095	0.633295	0.955952	NoSig	MFAP3
MRI1	496.248	0.227078	0.302165	0.751501	0.452351	0.929424	NoSig	MRI1
METTL1	1196.27	-0.0519593	0.315037	-0.164931	0.868999	0.989237	NoSig	METTL1
HOXC8	0.638075	-1.42454	2.04877	-0.695316	0.486857	NA	NA	HOXC8
AGA	839.913	0.283888	0.262124	1.08303	0.278796	0.873549	NoSig	AGA
PI4K2B	145.408	0.661281	0.500674	1.32078	0.186575	0.809817	NoSig	PI4K2B
BOD1L1	1261.56	0.0983993	0.372376	0.264247	0.791589	0.982068	NoSig	BOD1L1
MAT2B	2006.53	-0.0853719	0.278403	-0.306648	0.759111	0.979991	NoSig	MAT2B
TLL1	6.08747	0.315547	0.632289	0.499056	0.61774	0.954627	NoSig	TLL1
EDC4	2030.87	-0.410152	0.314836	-1.30275	0.192661	0.814656	NoSig	EDC4
TRIO	2465.59	-0.00531753	0.357343	-0.0148808	0.988127	0.998282	NoSig	TRIO
VCAN	158.953	-0.0205495	0.769745	-0.0266965	0.978702	0.99798	NoSig	VCAN
CLEC16A	1972.44	-0.428005	0.283168	-1.51149	0.130664	0.766008	NoSig	CLEC16A
MSR1	171.203	0.399689	0.622861	0.641699	0.521069	0.943248	NoSig	MSR1
CDH1	19626.7	0.599817	0.701022	0.855632	0.392201	0.913674	NoSig	CDH1
MTREX	1561.04	0.391094	0.353968	1.10489	0.269209	0.866472	NoSig	MTREX
DNAH5	11.1714	-0.0366406	0.587562	-0.0623604	0.950276	0.996677	NoSig	DNAH5
ZFYVE16	1485.3	-0.110333	0.460404	-0.239644	0.810607	0.983492	NoSig	ZFYVE16
RIPOR1	5839.56	-0.456663	0.380479	-1.20023	0.23005	0.843258	NoSig	RIPOR1
C6	1.02867	-0.0544946	1.22451	-0.0445032	0.964503	NA	NoSig	C6
RAI14	2262.5	0.17666	0.330079	0.535204	0.592509	0.952731	NoSig	RAI14
SOX30	8.65483	0.127501	0.608134	0.209659	0.833934	0.985978	NoSig	SOX30
PNKP	2384.01	0.144777	0.390005	0.371219	0.710474	0.969611	NoSig	PNKP
BEST2	3.55951	0.935453	2.78592	0.335779	NA	NA	NA	BEST2
PHLPP2	123.274	-0.3267	0.408659	-0.799444	0.424033	0.922727	NoSig	PHLPP2
SPDL1	193.036	-0.0428106	0.350831	-0.122026	0.902878	0.99167	NoSig	SPDL1
STAU2	957.156	0.568144	0.406215	1.39863	0.161925	0.787884	NoSig	STAU2
SLC66A1	1388.87	-0.518905	0.362172	-1.43276	0.151927	0.784237	NoSig	SLC66A1
CTNS	2589.87	-0.162262	0.340523	-0.476509	0.633712	0.956137	NoSig	CTNS
RTN4R	472.858	0.146779	0.329228	0.445828	0.655722	0.960361	NoSig	RTN4R
PHF23	3626.01	-0.34652	0.27619	-1.25464	0.209608	0.830055	NoSig	PHF23
CDH10	1.24532	-1.67162	1.29192	-1.2939	0.1957	NA	NA	CDH10
INPP4A	826.07	-0.00514199	0.3215	-0.0159938	0.987239	0.998106	NoSig	INPP4A
RAB27B	3.40037	0.516754	1.01567	0.508782	0.610905	0.953876	NoSig	RAB27B
PSMA4	2161.07	0.460906	0.361506	1.27496	0.202324	0.8263	NoSig	PSMA4
MYO16	23.2019	-1.36455	0.615069	-2.21853	0.026519	0.509425	NoSig	MYO16
LSG1	1145.66	-0.271667	0.235916	-1.15154	0.24951	0.857925	NoSig	LSG1
PARP3	854.517	-0.578728	0.342663	-1.68891	0.0912358	0.70613	NoSig	PARP3
TNC	218.372	0.212192	0.720704	0.294423	0.768435	0.980807	NoSig	TNC
THAP3	869.913	-0.336178	0.326617	-1.02927	0.303351	0.88423	NoSig	THAP3
RIPOR3	16.6399	0.00867505	0.629087	0.0137899	0.988998	0.998424	NoSig	RIPOR3
TDP1	539.242	-0.20141	0.199391	-1.01012	0.312435	0.886498	NoSig	TDP1
AIFM2	2223.38	0.505713	0.274473	1.84248	0.0654043	0.640687	NoSig	AIFM2
C2orf83	0.0243989	-0.248944	5.65541	-0.0440186	0.96489	NA	NoSig	C2orf83
SPATA7	301.989	-0.195652	0.330437	-0.592102	0.553782	0.946324	NoSig	SPATA7
MED17	707.975	0.146442	0.24847	0.589375	0.55561	0.94648	NoSig	MED17
RETSAT	4545.24	-0.0734532	0.259675	-0.282866	0.77728	0.982068	NoSig	RETSAT
CAPG	1261.34	-0.718775	0.769687	-0.933854	0.350379	0.89896	NoSig	CAPG
AP2S1	5145.45	0.151798	0.376921	0.40273	0.687147	0.964678	NoSig	AP2S1
USH2A	7.72068	-0.395305	0.673175	-0.587225	0.557053	0.94648	NoSig	USH2A
ZPBP	1.14939	-1.21985	1.76837	-0.689815	0.490311	NA	NA	ZPBP
TG	44.4444	-1.28707	0.701968	-1.83351	0.0667268	0.644924	NoSig	TG
ADAM28	50.9945	0.0416755	0.753163	0.0553339	0.955872	0.997573	NoSig	ADAM28
BARX2	0.974825	1.05941	1.47356	0.718948	0.472173	NA	NA	BARX2
DCUN1D1	265.485	-0.147422	0.372445	-0.395823	0.692236	0.965489	NoSig	DCUN1D1
JADE2	3508.68	-0.137573	0.270027	-0.509478	0.610417	0.953759	NoSig	JADE2
ZIC2	9.14984	-0.517317	1.50793	-0.343063	0.731551	0.974044	NoSig	ZIC2
LCP2	274.478	0.279897	0.676867	0.413518	0.679227	0.9644	NoSig	LCP2
TRIT1	1031.72	-0.172547	0.339485	-0.50826	0.611271	0.953876	NoSig	TRIT1
ADRB1	4.29109	-0.756535	1.01347	-0.746482	0.455376	0.929735	NoSig	ADRB1
GUCA2B	0	NA	NA	NA	NA	NA	NA	GUCA2B
CUL7	6431.13	-0.719332	0.471022	-1.52717	0.126718	0.758431	NoSig	CUL7
CTNNA1	15321.9	0.0480268	0.181033	0.265293	0.790784	0.982068	NoSig	CTNNA1
PHKA2	1447.88	-0.611855	0.293519	-2.08455	0.0371103	0.559541	NoSig	PHKA2
CNTLN	263.029	0.424749	0.395001	1.07531	0.282236	0.875672	NoSig	CNTLN
EPHA3	7.02299	0.180027	0.972449	0.185128	0.853129	0.988474	NoSig	EPHA3
HSPA5	14293	0.467513	0.305021	1.53272	0.125344	0.758431	NoSig	HSPA5
DSG2	638.204	0.405639	0.651555	0.62257	0.533567	0.943248	NoSig	DSG2
GEMIN8	1068.78	0.321731	0.275904	1.1661	0.243575	0.8544	NoSig	GEMIN8
OFD1	492.193	-0.0569636	0.45363	-0.125573	0.90007	0.991203	NoSig	OFD1
GPM6B	9387.06	1.01983	0.452715	2.25268	0.024279	0.496721	NoSig	GPM6B
MAGEC2	0.040888	0.528955	5.65541	0.0935308	0.925482	NA	NA	MAGEC2
PREX2	27.6499	0.454106	0.589359	0.770509	0.440998	0.926567	NoSig	PREX2
WDR37	994.648	-0.312301	0.230598	-1.35431	0.175638	0.797734	NoSig	WDR37
YTHDC2	742.402	0.230482	0.408893	0.563674	0.572976	0.949525	NoSig	YTHDC2
CTPS2	922.547	-0.0720051	0.209936	-0.342987	0.731609	0.974044	NoSig	CTPS2
ATP6V1H	3825.02	0.465061	0.372655	1.24797	0.212043	0.832224	NoSig	ATP6V1H
POLR2B	2479.59	0.378945	0.277549	1.36533	0.172151	0.796102	NoSig	POLR2B
FAM214A	430.555	0.132792	0.445495	0.298078	0.765644	0.980568	NoSig	FAM214A
ARAP2	140.433	-0.553349	0.805658	-0.686829	0.49219	0.939718	NoSig	ARAP2
TPR	2419.02	0.63042	0.488025	1.29178	0.196434	0.819244	NoSig	TPR
CP	548.34	0.298962	1.15503	0.258835	0.795762	0.982673	NoSig	CP
KIAA0556	1246.71	-0.363872	0.206476	-1.76229	0.0780196	0.677569	NoSig	KIAA0556
DTNBP1	1288.92	-0.483506	0.279663	-1.72889	0.0838292	0.689866	NoSig	DTNBP1
XK	12.8306	-0.0802899	0.625477	-0.128366	0.897859	0.991023	NoSig	XK
ANO2	44.3445	-0.927565	0.690614	-1.3431	0.179239	0.800989	NoSig	ANO2
C12orf4	333.315	0.339787	0.410988	0.826756	0.408375	0.918433	NoSig	C12orf4
SCML1	270.145	-0.307489	0.704635	-0.436381	0.66256	0.960764	NoSig	SCML1
WWC3	3647.63	0.0458741	0.261958	0.17512	0.860985	0.989237	NoSig	WWC3
ARHGAP6	26.7349	-0.317004	0.441489	-0.718033	0.472737	0.935901	NoSig	ARHGAP6
FAM184B	138.465	-0.450748	0.549065	-0.820937	0.411682	0.919245	NoSig	FAM184B
MAP4	23297.4	-0.507577	0.40921	-1.24038	0.214834	0.834112	NoSig	MAP4
GOPC	894.66	0.197824	0.403424	0.490361	0.623878	0.955171	NoSig	GOPC
ROS1	0.067979	-0.362094	5.00675	-0.0723211	0.942346	NA	NoSig	ROS1
USP28	543.84	0.289467	0.380367	0.76102	0.446645	0.928675	NoSig	USP28
HDAC9	181.49	0.525832	0.63479	0.828357	0.407468	0.917867	NoSig	HDAC9
TSPAN17	2015.37	0.0866218	0.323268	0.267957	0.788733	0.982068	NoSig	TSPAN17
NOP16	945.644	0.270141	0.275217	0.981554	0.32632	0.891646	NoSig	NOP16
CC2D2A	1244.73	0.252652	0.264116	0.956595	0.338772	0.895532	NoSig	CC2D2A
RRM2B	1774.15	0.553212	0.601102	0.920329	0.357401	0.90275	NoSig	RRM2B
ZNF800	412.577	0.291436	0.304972	0.955614	0.339267	0.895532	NoSig	ZNF800
TNFRSF17	5.21419	5.21742	2.09414	2.49143	NA	NA	NA	TNFRSF17
SNX29	1171.42	-0.679103	0.287311	-2.36365	0.0180958	0.441616	NoSig	SNX29
LMO3	131.809	-1.39793	0.647748	-2.15813	0.0309176	0.534123	NoSig	LMO3
MRPS10	1503.77	0.138967	0.22251	0.624542	0.532272	0.943248	NoSig	MRPS10
GUCA1A	18.4005	-1.53566	1.36428	-1.12562	0.260324	0.861068	NoSig	GUCA1A
RSF1	985.574	0.16221	0.309663	0.523827	0.600399	0.952731	NoSig	RSF1
VPS13D	1824.63	-0.0045722	0.259584	-0.0176136	0.985947	0.998106	NoSig	VPS13D
CELF2	1186.63	1.10362	0.807722	1.36634	0.171832	0.796102	NoSig	CELF2
FAM120A	6726.29	0.326015	0.2013	1.61954	0.10533	0.734792	NoSig	FAM120A
R3HDM1	666.937	0.220452	0.265784	0.829442	0.406854	0.917372	NoSig	R3HDM1
COL9A2	446.152	-0.28011	0.949463	-0.295019	0.76798	0.980574	NoSig	COL9A2
KITLG	65.6724	-0.0565807	0.618778	-0.0914395	0.927143	0.993933	NoSig	KITLG
ERCC8	209.988	0.135455	0.292359	0.463318	0.643137	0.957549	NoSig	ERCC8
ADAMTS6	8.37828	-0.432332	0.759622	-0.569141	0.569261	0.949513	NoSig	ADAMTS6
H6PD	4349.99	-0.243681	0.271403	-0.897858	0.369261	0.904625	NoSig	H6PD
VAMP3	4622.16	-0.395698	0.322689	-1.22625	0.220103	0.837917	NoSig	VAMP3
PER3	702.874	-0.563526	0.409605	-1.37578	0.16889	0.794241	NoSig	PER3
UTS2	1.34397	-0.245803	1.58315	-0.155262	0.876615	NA	NoSig	UTS2
TNFRSF9	46.475	1.11454	1.53248	0.727281	0.467054	0.933821	NoSig	TNFRSF9
EPN3	10.0708	1.18413	0.752612	1.57336	0.115635	0.747065	NoSig	EPN3
LTBP1	815.442	-1.18963	0.578589	-2.05609	0.0397738	0.567555	NoSig	LTBP1
RCN1	3544.87	-0.037678	0.229074	-0.16448	0.869354	0.989237	NoSig	RCN1
ELN	253.535	-0.552862	0.592273	-0.933457	0.350584	0.899093	NoSig	ELN
RFC2	1110.19	0.283782	0.205077	1.38379	0.166424	0.791891	NoSig	RFC2
ARID1B	5308.67	-0.0319992	0.305316	-0.104807	0.916529	0.993508	NoSig	ARID1B
CLPTM1L	5663.54	-0.0890564	0.280839	-0.317108	0.751161	0.978309	NoSig	CLPTM1L
NEDD4L	7930.46	-0.192545	0.212387	-0.906577	0.364631	0.904055	NoSig	NEDD4L
FOXP3	62.1127	0.388716	0.613398	0.633709	0.526271	0.943248	NoSig	FOXP3
PPP1R3F	357.105	-0.304659	0.347684	-0.876253	0.380893	0.910932	NoSig	PPP1R3F
HEXB	6973.79	0.512657	0.294389	1.74143	0.0816085	0.685797	NoSig	HEXB
PTCD2	409.448	0.17255	0.26779	0.64435	0.519349	0.943248	NoSig	PTCD2
NEXMIF	12.7767	-1.15401	0.817336	-1.41191	0.157975	0.786744	NoSig	NEXMIF
JKAMP	1245.32	0.242733	0.332986	0.728956	0.466028	0.93338	NoSig	JKAMP
DKK3	1108.02	-1.10682	0.891369	-1.2417	0.214346	0.833797	NoSig	DKK3
ARHGEF5	400.404	-1.4738	0.575028	-2.563	0.0103772	0.355291	NoSig	ARHGEF5
NFE2L3	175.995	0.150579	0.490991	0.306685	0.759083	0.979991	NoSig	NFE2L3
MCUR1	1354.31	-0.241832	0.225354	-1.07312	0.283217	0.876626	NoSig	MCUR1
LIMA1	1432.28	0.253747	0.452655	0.560574	0.575088	0.949525	NoSig	LIMA1
LETMD1	6411.23	-0.302371	0.377628	-0.80071	0.423299	0.922106	NoSig	LETMD1
SLC4A8	18.134	-0.107493	0.641241	-0.167632	0.866873	0.989237	NoSig	SLC4A8
LAMC3	2344.67	0.358925	0.557141	0.644226	0.519429	0.943248	NoSig	LAMC3
PTGER3	14.6766	0.0178863	0.697714	0.0256356	0.979548	0.99798	NoSig	PTGER3
TNIP3	3.3272	0.633501	1.37876	0.459471	0.645896	0.958009	NoSig	TNIP3
MAPK9	1033.03	0.11285	0.200803	0.561995	0.57412	0.949525	NoSig	MAPK9
COL23A1	207.989	0.382115	0.684753	0.558034	0.576821	0.949525	NoSig	COL23A1
BCAR1	3045.74	0.0663334	0.317578	0.208873	0.834548	0.986243	NoSig	BCAR1
FAM160A2	1279.27	-0.279629	0.193741	-1.44331	0.148932	0.781198	NoSig	FAM160A2
HERPUD1	2327.12	0.266789	0.202046	1.32043	0.18669	0.809817	NoSig	HERPUD1
HOMER3	2577.87	-0.408501	0.412735	-0.989742	0.3223	0.89027	NoSig	HOMER3
RAD51	108.107	-0.0864973	0.380308	-0.22744	0.820081	0.984564	NoSig	RAD51
POLQ	26.3687	-0.246752	0.497937	-0.495548	0.620213	0.954849	NoSig	POLQ
PIK3CB	1906.87	0.180999	0.266623	0.678858	0.497228	0.940931	NoSig	PIK3CB
CYBA	9059.76	0.156911	0.493739	0.317802	0.750635	0.97822	NoSig	CYBA
THOC3	265.639	0.335981	0.311984	1.07692	0.281517	0.875485	NoSig	THOC3
HEBP2	936.129	-0.446905	0.398604	-1.12118	0.262213	0.86221	NoSig	HEBP2
MPHOSPH9	275.519	0.614318	0.55043	1.11607	0.264392	0.862865	NoSig	MPHOSPH9
PLEKHA5	3461.83	0.142229	0.377961	0.376307	0.706689	0.968517	NoSig	PLEKHA5
PRSS8	14.2297	-2.20795	1.03905	-2.12497	0.0335893	0.544211	NoSig	PRSS8
SIKE1	467.308	0.172554	0.411601	0.419225	0.675052	0.963606	NoSig	SIKE1
RRP12	2883.44	-0.37612	0.35214	-1.0681	0.285476	0.87742	NoSig	RRP12
FNIP2	2965.99	0.290257	0.398191	0.72894	0.466038	0.93338	NoSig	FNIP2
MSMO1	342.098	0.374935	0.328939	1.13983	0.254356	0.859871	NoSig	MSMO1
TTC17	2556.11	0.105358	0.184624	0.570662	0.568229	0.949317	NoSig	TTC17
ALX4	19.7685	-1.8511	1.0579	-1.74979	0.0801552	0.682585	NoSig	ALX4
FSTL4	257.766	0.19355	0.579645	0.333912	0.738446	0.975207	NoSig	FSTL4
FOXN3	2421.2	0.0921449	0.24244	0.380073	0.703892	0.967962	NoSig	FOXN3
METTL24	4.0875	-0.654307	0.83649	-0.782205	0.434094	0.924886	NoSig	METTL24
AKR7A2	2877.73	-0.443223	0.394222	-1.1243	0.260887	0.861218	NoSig	AKR7A2
MRTO4	2246.13	-0.169231	0.250437	-0.675745	0.499203	0.940996	NoSig	MRTO4
NNAT	19.8247	-0.571003	0.794234	-0.718935	0.472181	0.935901	NoSig	NNAT
USE1	2464.78	0.0146309	0.388955	0.037616	0.969994	0.99798	NoSig	USE1
MCF2L2	13.4835	-0.00889866	0.707286	-0.0125814	0.989962	0.998612	NoSig	MCF2L2
NRIP2	212.809	0.138905	0.390413	0.35579	0.721998	0.971813	NoSig	NRIP2
LAMA3	39.9737	-0.0104371	0.532811	-0.0195888	0.984371	0.99798	NoSig	LAMA3
AP5M1	914.93	0.139574	0.298158	0.468119	0.639699	0.95743	NoSig	AP5M1
ANAPC4	681.482	0.248471	0.404124	0.61484	0.538661	0.943967	NoSig	ANAPC4
KCNQ1	672.255	-0.33339	0.431812	-0.772072	0.440072	0.926227	NoSig	KCNQ1
TRAPPC3	2765.97	-0.385843	0.271908	-1.41902	0.155893	0.785823	NoSig	TRAPPC3
THRAP3	7215.1	-0.429744	0.24638	-1.74423	0.0811187	0.684858	NoSig	THRAP3
PHPT1	6151.62	0.0902608	0.33917	0.266123	0.790145	0.982068	NoSig	PHPT1
ENTPD2	33.6358	-0.292065	0.747986	-0.390469	0.69619	0.96552	NoSig	ENTPD2
LY75	34.2421	-0.362271	0.924801	-0.391728	NA	NA	NoSig	LY75
ARID4B	514.371	0.236411	0.499723	0.473085	0.636153	0.956742	NoSig	ARID4B
OPN3	143.55	0.0736383	0.442864	0.166278	0.867938	0.989237	NoSig	OPN3
SDCCAG8	543.201	0.031998	0.312406	0.102425	0.91842	0.993572	NoSig	SDCCAG8
PTPRN	31.4714	-1.14566	1.03917	-1.10247	0.270257	0.867691	NoSig	PTPRN
HHAT	642.847	-0.261448	0.291297	-0.897531	0.369436	0.904625	NoSig	HHAT
KIF1B	2515.64	0.278441	0.281007	0.990869	0.32175	0.89027	NoSig	KIF1B
FOXC1	162.745	0.506663	0.477634	1.06078	0.288791	0.879582	NoSig	FOXC1
TBC1D22A	3183.61	-0.207844	0.327978	-0.633713	0.526268	0.943248	NoSig	TBC1D22A
SYNE2	5016.62	0.401378	0.669778	0.599271	0.548992	0.945584	NoSig	SYNE2
PLEKHH1	7309.7	0.0161589	0.336444	0.0480287	0.961693	0.99798	NoSig	PLEKHH1
ATP9A	3489.52	0.27392	0.318927	0.858879	0.390408	0.913674	NoSig	ATP9A
SPO11	0.0274694	-0.248944	5.65541	-0.0440186	0.96489	NA	NoSig	SPO11
CBLN4	3.39637	-0.511382	1.32507	-0.385929	0.69955	0.966652	NoSig	CBLN4
CHRDL2	4.25886	-2.1162	1.2577	-1.68259	0.0924545	0.708209	NoSig	CHRDL2
FAM168A	2976.2	-0.327525	0.17775	-1.84261	0.065386	0.640687	NoSig	FAM168A
RELT	324.214	-0.0729376	0.339894	-0.214589	0.830088	0.985497	NoSig	RELT
GALC	979.437	-0.489594	0.359938	-1.36022	0.173761	0.797211	NoSig	GALC
NOP58	1222.43	0.432411	0.472049	0.916031	0.359651	0.903343	NoSig	NOP58
SZRD1	7833.29	-0.170056	0.275597	-0.617046	0.537204	0.94386	NoSig	SZRD1
KCNH2	27.3218	-0.91385	0.893106	-1.02323	0.306201	0.884737	NoSig	KCNH2
CUL1	1990.61	0.473481	0.314076	1.50754	0.131673	0.767857	NoSig	CUL1
FAM114A2	720.963	0.099039	0.268665	0.368634	0.7124	0.970124	NoSig	FAM114A2
CYFIP2	675.379	-0.486914	0.633657	-0.76842	0.442238	0.927314	NoSig	CYFIP2
TAB2	1446.49	-0.19181	0.367071	-0.522541	0.601293	0.952731	NoSig	TAB2
GINM1	981.491	0.142942	0.330745	0.432183	0.665608	0.961216	NoSig	GINM1
EIF2AK2	1544.08	0.126339	0.325079	0.388642	0.697541	0.966025	NoSig	EIF2AK2
USP36	3345.94	-0.56415	0.302949	-1.8622	0.0625755	0.632382	NoSig	USP36
KMT2C	1873.44	0.16854	0.253997	0.663552	0.506977	0.942442	NoSig	KMT2C
MCOLN3	189.606	-0.506498	0.61107	-0.82887	0.407178	0.917484	NoSig	MCOLN3
CCDC85A	8.06193	-0.187717	0.722899	-0.259673	0.795116	0.982673	NoSig	CCDC85A
PUM2	4112.99	0.00226867	0.304731	0.00744481	0.99406	0.999566	NoSig	PUM2
MRPL43	2554.07	-0.0284743	0.240419	-0.118436	0.905722	0.991844	NoSig	MRPL43
ITIH4	4.52896	-1.17633	0.831139	-1.41532	0.156975	0.786744	NoSig	ITIH4
ITIH1	0.731144	-0.234951	1.33615	-0.175841	0.860418	NA	NoSig	ITIH1
HPF1	423.664	0.220984	0.260871	0.8471	0.396939	0.91471	NoSig	HPF1
ZFR	2173.19	0.237837	0.408168	0.582692	0.5601	0.947012	NoSig	ZFR
ZNF280C	132.866	0.100052	0.344437	0.290481	0.771448	0.980807	NoSig	ZNF280C
NPFFR2	0.980099	-1.06544	1.36919	-0.778157	0.436476	NA	NA	NPFFR2
PHF21B	19.7483	-1.48801	0.801752	-1.85595	0.0634605	0.637196	NoSig	PHF21B
TRAF1	508.85	0.044668	0.412773	0.108214	0.913826	0.993508	NoSig	TRAF1
RC3H2	1207.21	0.0841541	0.303226	0.277529	0.781374	0.982068	NoSig	RC3H2
IL17RB	74.3319	-0.161838	0.318856	-0.507559	0.611763	0.953876	NoSig	IL17RB
TRAF3IP2	3862.11	-0.247244	0.362659	-0.681755	0.495394	0.940757	NoSig	TRAF3IP2
GYG2	11292.8	-0.628418	0.499184	-1.25889	0.208069	0.830055	NoSig	GYG2
DCBLD2	1022.9	-0.576825	0.338949	-1.70181	0.0887919	0.701036	NoSig	DCBLD2
SERPINB3	0.109141	-0.475242	5.45089	-0.0871861	0.930524	NA	NoSig	SERPINB3
SOAT1	2137.33	0.374482	0.537692	0.696461	0.48614	0.938671	NoSig	SOAT1
PKP2	55.2471	-0.302497	0.568274	-0.532309	0.594512	0.952731	NoSig	PKP2
MSH4	9.49952	-1.00458	0.909563	-1.10446	0.269392	0.86676	NoSig	MSH4
F7	1088.3	-0.177476	0.587727	-0.30197	0.762675	0.980343	NoSig	F7
GDI2	10031.9	0.243505	0.215496	1.12997	0.258487	0.861068	NoSig	GDI2
PRDM1	73.5695	0.916729	0.613468	1.49434	0.135087	0.772635	NoSig	PRDM1
ATG5	474.652	0.185463	0.369696	0.501663	0.615904	0.954022	NoSig	ATG5
TMCC3	178.926	-0.179251	0.537135	-0.333718	0.738593	0.975207	NoSig	TMCC3
PITHD1	2316.65	-0.472151	0.266992	-1.76841	0.0769921	0.676044	NoSig	PITHD1
MTA3	2199.9	-0.0838435	0.201839	-0.415398	0.67785	0.964309	NoSig	MTA3
USP13	617.724	-0.012988	0.327627	-0.0396425	0.968378	0.99798	NoSig	USP13
ATP11B	648.695	-0.217567	0.351298	-0.619324	0.535703	0.943836	NoSig	ATP11B
LAMC2	8.43131	0.525247	1.01479	0.517591	0.604743	0.952731	NoSig	LAMC2
CDK14	244.391	0.100977	0.619005	0.163127	0.870418	0.989269	NoSig	CDK14
SEC61A1	12261.9	-0.27753	0.293222	-0.946484	0.343902	0.896092	NoSig	SEC61A1
PPP1R12A	870.415	0.134755	0.524103	0.257116	0.797089	0.982953	NoSig	PPP1R12A
RASGRF1	64.0524	0.0846676	0.806114	0.105032	0.916351	0.993508	NoSig	RASGRF1
CAMK2B	64.9669	-0.892388	0.650794	-1.37123	0.170303	0.795131	NoSig	CAMK2B
CROCC	1742.27	-0.157417	0.268142	-0.587064	0.557161	0.94648	NoSig	CROCC
POLR3E	1484.76	-0.0169063	0.139741	-0.120983	0.903704	0.99174	NoSig	POLR3E
ATP2B4	6980.02	-0.15932	0.278865	-0.571317	0.567785	0.949317	NoSig	ATP2B4
ZC3H11A	3368.51	0.42756	0.312954	1.3662	0.171875	0.796102	NoSig	ZC3H11A
RIOK2	654.267	0.384223	0.29681	1.29451	0.19549	0.818247	NoSig	RIOK2
YIPF1	1245.01	-0.271816	0.313355	-0.867439	0.385702	0.912374	NoSig	YIPF1
NDC1	593.625	0.255926	0.326422	0.784035	0.43302	0.924815	NoSig	NDC1
DGKG	107.676	0.530066	0.611701	0.866544	0.386192	0.912465	NoSig	DGKG
FLYWCH1	8290.06	-0.600814	0.343784	-1.74765	0.0805245	0.683247	NoSig	FLYWCH1
UNKL	485.733	-0.170476	0.251022	-0.679126	0.497058	0.940931	NoSig	UNKL
TBXAS1	307.784	-0.297501	0.441883	-0.673258	0.500783	0.941586	NoSig	TBXAS1
PARP12	827.197	0.519073	0.498542	1.04118	0.297791	0.882646	NoSig	PARP12
ALDH18A1	2815.18	-0.337014	0.27628	-1.21983	0.222531	0.838088	NoSig	ALDH18A1
TARBP1	1608.38	-0.043868	0.423884	-0.103491	0.917574	0.993572	NoSig	TARBP1
GATB	1799.1	0.120319	0.237913	0.505728	0.613048	0.953876	NoSig	GATB
MXD1	233.928	-0.288206	0.281051	-1.02546	0.305146	0.884649	NoSig	MXD1
CDK17	893.173	0.24923	0.296846	0.839596	0.401135	0.916338	NoSig	CDK17
DNAJC25	366.804	0.299613	0.339066	0.883642	0.376889	0.909491	NoSig	DNAJC25
SLC2A3	455.547	0.35676	0.631514	0.564928	0.572123	0.949525	NoSig	SLC2A3
PSD	301.448	-1.39606	0.561064	-2.48823	0.0128381	0.386377	NoSig	PSD
CTDP1	2019.31	-0.37409	0.240025	-1.55855	0.119104	0.755662	NoSig	CTDP1
YBX3	8040	-0.0273063	0.24453	-0.111669	0.911086	0.992842	NoSig	YBX3
STYK1	1.25679	0.276785	1.24625	0.222095	0.82424	NA	NoSig	STYK1
WNK1	5577.82	0.251057	0.22981	1.09245	0.274634	0.871731	NoSig	WNK1
RPS17P5	2.44434	-0.810275	0.936608	-0.865117	0.386975	0.912489	NoSig	RPS17P5
CCAR1	1026.12	0.173996	0.51903	0.335233	0.737449	0.975207	NoSig	CCAR1
OGFR	3654.34	-0.205485	0.356452	-0.576471	0.564297	0.9484	NoSig	OGFR
GNA15	94.8195	-0.406899	0.491933	-0.827144	0.408156	0.91842	NoSig	GNA15
CREB3L3	0.267978	0.246166	2.36885	0.103918	0.917235	NA	NoSig	CREB3L3
PIGV	822.153	-0.163797	0.28453	-0.575675	0.564835	0.9484	NoSig	PIGV
PTPRU	2803.93	-0.907627	0.644644	-1.40795	0.159146	0.787075	NoSig	PTPRU
SNRNP40	932.51	-0.162388	0.244343	-0.664588	0.506314	0.942251	NoSig	SNRNP40
RIMBP2	40.6895	1.26935	0.993242	1.27799	0.201254	0.824872	NoSig	RIMBP2
COL11A1	862.975	-3.59536	1.01418	-3.5451	0.00039247	0.0780606	NoSig	COL11A1
QSER1	843.037	-0.207011	0.303452	-0.682187	0.495121	0.940757	NoSig	QSER1
MPC1	1675.73	0.301679	0.317721	0.949506	0.342363	0.895693	NoSig	MPC1
ACAA1	1658.4	-0.562639	0.340356	-1.65309	0.0983124	0.725276	NoSig	ACAA1
BCAT1	292.094	0.569881	0.793952	0.717778	0.472894	0.935901	NoSig	BCAT1
HDAC7	3537.27	-0.313489	0.305621	-1.02574	0.305012	0.884649	NoSig	HDAC7
LZTS1	11995.9	-0.740934	0.51089	-1.45028	0.14698	0.778211	NoSig	LZTS1
PRDM6	6.32064	0.824778	0.903279	0.913094	0.361193	0.903682	NoSig	PRDM6
WNT8A	0.0998393	0.246091	3.56824	0.0689672	0.945016	NA	NoSig	WNT8A
SPAG4	137.012	0.622781	0.568063	1.09632	0.272937	0.869861	NoSig	SPAG4
NCKAP1	4449.34	0.292395	0.322157	0.907614	0.364082	0.904049	NoSig	NCKAP1
MRPS35	1144.8	0.31877	0.243172	1.31088	0.189897	0.813089	NoSig	MRPS35
GUCY1B1	74.0525	0.86364	0.581029	1.4864	0.137174	0.773493	NoSig	GUCY1B1
SFSWAP	2379.81	-0.134474	0.192991	-0.696792	0.485933	0.938529	NoSig	SFSWAP
TNK2	3291.42	-1.25038	0.395879	-3.15849	0.0015859	0.161939	NoSig	TNK2
MON2	922.941	0.355333	0.437138	0.812863	0.416297	0.920903	NoSig	MON2
CDH3	371.799	-1.07533	0.552239	-1.94722	0.0515078	0.599599	NoSig	CDH3
ARSF	2.21998	0.470036	1.17884	0.398727	0.690094	0.965269	NoSig	ARSF
GPBP1	2125.78	0.252587	0.327165	0.772048	0.440086	0.926227	NoSig	GPBP1
DGAT2	226.222	0.0312436	0.430707	0.0725403	0.942172	0.99592	NoSig	DGAT2
ZNF112	126.134	-0.182801	0.402511	-0.454151	0.64972	0.959478	NoSig	ZNF112
CS	12339.2	-0.0901783	0.318745	-0.282917	0.777241	0.982068	NoSig	CS
LTK	207.262	-0.273539	0.800939	-0.341522	0.73271	0.97449	NoSig	LTK
MRPS24	901.127	0.137496	0.406241	0.338459	0.735017	0.97492	NoSig	MRPS24
ELMO2	2912.38	-0.350727	0.191667	-1.82988	0.0672678	0.647945	NoSig	ELMO2
WAPL	1442.98	0.22888	0.284298	0.805071	0.420779	0.921897	NoSig	WAPL
VMP1	4777.51	0.227529	0.301265	0.755245	0.450102	0.929424	NoSig	VMP1
APPBP2	1215.69	0.216175	0.320094	0.675349	0.499454	0.941023	NoSig	APPBP2
POLD1	1604.23	-0.863031	0.388018	-2.2242	0.0261347	0.507022	NoSig	POLD1
SEZ6	20.8719	-2.96906	1.12286	-2.64419	0.00818863	0.326735	NoSig	SEZ6
EIF4B	34386.1	0.206065	0.32962	0.625161	0.531865	0.943248	NoSig	EIF4B
SLC6A16	147.746	-0.673622	0.427491	-1.57576	0.115082	0.747065	NoSig	SLC6A16
BICRA	1153.85	-0.505708	0.253708	-1.99327	0.0462318	0.58481	NoSig	BICRA
SPHK2	1152.31	-0.151354	0.317277	-0.477042	0.633333	0.955952	NoSig	SPHK2
RPL18	101348	-0.335914	0.48802	-0.68832	0.491252	0.939718	NoSig	RPL18
CA11	208.008	-0.614917	0.508695	-1.20881	0.226735	0.842189	NoSig	CA11
ISOC2	2994.14	0.221943	0.349981	0.634157	0.525979	0.943248	NoSig	ISOC2
U2AF2	7814.88	-0.093055	0.244041	-0.381309	0.702974	0.96769	NoSig	U2AF2
EPN1	13562.7	-0.479795	0.445983	-1.07581	0.28201	0.875485	NoSig	EPN1
MED29	2917.15	0.227921	0.158067	1.44192	0.149324	0.781198	NoSig	MED29
AHRR	1212.12	0.0199238	0.406157	0.0490544	0.960876	0.99798	NoSig	AHRR
GSC2	0.740254	-1.43781	1.47508	-0.974734	0.329692	NA	NA	GSC2
ZNF275	1065.97	-0.0076967	0.195807	-0.0393075	0.968645	0.99798	NoSig	ZNF275
MTMR1	1045.81	0.276984	0.232632	1.19065	0.23379	0.846855	NoSig	MTMR1
GPC1	5407.15	0.22115	0.442851	0.499377	0.617513	0.954544	NoSig	GPC1
ADCK1	1431.26	-0.317348	0.284435	-1.11571	0.264544	0.862865	NoSig	ADCK1
HAGH	1579.12	0.117814	0.257778	0.457037	0.647644	0.95823	NoSig	HAGH
RNF4	2509.01	0.00412747	0.205947	0.0200414	0.98401	0.99798	NoSig	RNF4
CASP8	355.904	0.338186	0.389773	0.867648	0.385587	0.912333	NoSig	CASP8
LIMCH1	303.499	0.0384745	0.506437	0.0759709	0.939442	0.995792	NoSig	LIMCH1
INTS13	880.826	0.132474	0.387841	0.341569	0.732676	0.97449	NoSig	INTS13
TM7SF3	3420.83	0.186957	0.309792	0.60349	0.546183	0.945449	NoSig	TM7SF3
DLX3	43.1374	-1.25091	0.642149	-1.948	0.0514144	0.599396	NoSig	DLX3
SPA17	158.182	0.263057	0.300023	0.87679	0.380601	0.910722	NoSig	SPA17
TSPAN32	33.9226	-0.302775	0.661864	-0.457459	0.647341	0.958145	NoSig	TSPAN32
CCN5	140.759	-3.42661	0.946734	-3.6194	0.000295288	0.0703554	NoSig	CCN5
DMRT3	0.829215	-0.826151	1.91644	-0.431085	0.666407	NA	NA	DMRT3
ST3GAL6	3684.04	-0.357852	0.379739	-0.942365	0.346006	0.896691	NoSig	ST3GAL6
ATP2C2	7.45505	-0.281065	0.649953	-0.432439	0.665422	0.961212	NoSig	ATP2C2
NGFR	147.139	-0.817935	0.862463	-0.948371	0.342941	0.895738	NoSig	NGFR
CDON	367.997	-0.338852	0.295182	-1.14794	0.250992	0.858429	NoSig	CDON
TAF2	1007.44	0.660345	0.591527	1.11634	0.264277	0.862865	NoSig	TAF2
HIPK2	7659.55	-0.449302	0.356644	-1.2598	0.20774	0.830055	NoSig	HIPK2
TNPO3	2393.93	0.379535	0.185536	2.04561	0.0407946	0.569049	NoSig	TNPO3
BORCS8-MEF2B	21.9676	-0.733129	0.470977	-1.55661	0.119562	0.756261	NoSig	BORCS8-MEF2B
RFXANK	3287.54	-0.193214	0.400419	-0.482528	0.629431	0.955528	NoSig	RFXANK
TMEM161A	3154.58	0.365795	0.378455	0.966547	0.33377	0.894562	NoSig	TMEM161A
LPAR2	389.001	-1.08859	0.449137	-2.42373	0.015362	0.42087	NoSig	LPAR2
CTSA	15783.7	-0.218093	0.379536	-0.57463	0.565541	0.948599	NoSig	CTSA
SUGP2	1437.9	-0.0833529	0.218233	-0.381945	0.702502	0.967567	NoSig	SUGP2
SLC12A2	358.3	0.0435646	0.352181	0.1237	0.901553	0.991542	NoSig	SLC12A2
SNX24	415.088	0.0857796	0.285656	0.30029	0.763956	0.980568	NoSig	SNX24
EYA2	126.635	-2.23357	0.92407	-2.4171	0.0156447	0.42087	NoSig	EYA2
CNN2	3039.81	-1.13786	0.521584	-2.18154	0.0291434	0.52577	NoSig	CNN2
ABCA7	471.602	0.263416	0.594731	0.442915	0.657827	0.960361	NoSig	ABCA7
SNCAIP	7.04969	0.771518	0.731878	1.05416	0.291809	0.880839	NoSig	SNCAIP
DDX20	601.843	0.0999237	0.307358	0.325105	0.745101	0.976709	NoSig	DDX20
BTBD1	1649.4	0.366894	0.384187	0.954989	0.339584	0.895572	NoSig	BTBD1
FAR2	1956.48	0.123389	0.379442	0.325186	0.745041	0.976709	NoSig	FAR2
BCAS1	4.70513	-0.875142	1.0525	-0.831489	0.405698	0.91713	NoSig	BCAS1
POU1F1	0.450228	-0.840809	1.39085	-0.604528	0.545493	NA	NA	POU1F1
CHI3L2	39.3765	-0.281085	0.962435	-0.292056	0.770244	0.980807	NoSig	CHI3L2
SBNO2	5080.79	-0.0711753	0.315762	-0.225408	0.821662	0.984564	NoSig	SBNO2
PMS1	295.177	0.309293	0.480318	0.643934	0.519618	0.943248	NoSig	PMS1
HMG20B	8245.44	-0.589558	0.410275	-1.43698	0.150723	0.782807	NoSig	HMG20B
CALCRL	59.0967	0.384309	0.519815	0.739319	0.459714	0.9316	NoSig	CALCRL
TAF11	1092.65	-0.123048	0.255986	-0.480684	0.630741	0.955528	NoSig	TAF11
ANKS1A	3390.08	-0.325192	0.308492	-1.05414	0.291821	0.880839	NoSig	ANKS1A
AP3D1	12948.2	-0.300575	0.281849	-1.06644	0.286225	0.878158	NoSig	AP3D1
ZNF76	2016.17	-0.182284	0.216586	-0.841622	0.399999	0.91622	NoSig	ZNF76
SLC9A3R2	2263.04	-0.256831	0.404794	-0.634474	0.525772	0.943248	NoSig	SLC9A3R2
NTHL1	1061.56	-0.482034	0.421652	-1.1432	0.252954	0.858565	NoSig	NTHL1
UHRF1BP1	1439.48	0.0568127	0.3121	0.182034	0.855556	0.988624	NoSig	UHRF1BP1
GNAI3	2152.27	-0.0565478	0.24336	-0.232363	0.816256	0.983979	NoSig	GNAI3
IPO5	6448.42	0.152973	0.271755	0.562906	0.573499	0.949525	NoSig	IPO5
OAT	2953.53	0.503074	0.266979	1.88432	0.0595214	0.625084	NoSig	OAT
WDR3	1375.89	0.0969713	0.280157	0.346131	0.729244	0.97327	NoSig	WDR3
PKN2	1429.46	0.0837901	0.503571	0.166392	0.867849	0.989237	NoSig	PKN2
WDR18	2298.03	-0.192119	0.367126	-0.523306	0.600761	0.952731	NoSig	WDR18
TRAM2	1859.04	0.0987227	0.351	0.281261	0.77851	0.982068	NoSig	TRAM2
NTN1	69.5741	-0.589921	0.639655	-0.922249	0.356399	0.90186	NoSig	NTN1
GLP2R	0.701363	-0.809924	1.70636	-0.474651	0.635036	NA	NA	GLP2R
MCM10	49.902	0.352685	0.577742	0.610454	0.541561	0.944835	NoSig	MCM10
DGKA	362.875	0.570399	0.447248	1.27535	0.202184	0.825961	NoSig	DGKA
ERBB3	9905.45	-1.42149	0.599874	-2.36965	0.0178049	0.437489	NoSig	ERBB3
ROPN1	220.227	-4.65387	1.11194	-4.18538	2.84689e-05	0.0250449	Down	ROPN1
ANKRD44	901.47	0.612	0.536551	1.14062	0.254029	0.859731	NoSig	ANKRD44
KARS1	7749.76	-0.0252279	0.24385	-0.103457	0.9176	0.993572	NoSig	KARS1
ADAT1	563.495	-0.339889	0.294287	-1.15496	0.248107	0.856596	NoSig	ADAT1
PDIA5	395.452	-0.0627607	0.301346	-0.208268	0.83502	0.98646	NoSig	PDIA5
TBC1D22B	1155.78	-0.410082	0.276786	-1.48158	0.138451	0.775035	NoSig	TBC1D22B
NDUFB4	3896.57	-0.359784	0.350458	-1.02661	0.304603	0.884649	NoSig	NDUFB4
SPEN	2964.22	-0.190181	0.2359	-0.806195	0.420131	0.921897	NoSig	SPEN
MYLK	564.306	-0.822808	0.414508	-1.98503	0.0471417	0.58725	NoSig	MYLK
ZC3H15	1394.14	0.362629	0.34933	1.03807	0.299237	0.883189	NoSig	ZC3H15
MAP2K4	751.166	0.156814	0.253202	0.619324	0.535703	0.943836	NoSig	MAP2K4
PACC1	437.279	0.83884	0.426828	1.96529	0.049381	0.595394	NoSig	PACC1
SNAP91	11.4095	-0.849783	1.0367	-0.819697	0.412389	0.919434	NoSig	SNAP91
SLK	1442.66	0.287425	0.325638	0.882651	0.377425	0.909849	NoSig	SLK
CYB5R4	243.153	0.258637	0.409047	0.632292	0.527196	0.943248	NoSig	CYB5R4
COL17A1	3.47073	0.620228	0.898991	0.689916	0.490247	0.939718	NoSig	COL17A1
GSTO2	437.394	-1.88893	0.849033	-2.2248	0.0260945	0.506672	NoSig	GSTO2
SEC61A2	184.375	-0.104673	0.38269	-0.273519	0.784455	0.982068	NoSig	SEC61A2
PRKCQ	63.4767	-1.18179	0.639847	-1.84699	0.0647491	0.640687	NoSig	PRKCQ
TLE2	789.251	-1.2121	0.579121	-2.09299	0.0363498	0.554695	NoSig	TLE2
ASB1	1474.57	-0.204704	0.239001	-0.856498	0.391722	0.913674	NoSig	ASB1
FAM107B	436.345	0.358279	0.417618	0.85791	0.390942	0.913674	NoSig	FAM107B
ME1	211.363	0.762716	0.795332	0.958991	0.337563	0.894562	NoSig	ME1
TBC1D1	4440.52	0.826952	0.354091	2.33543	0.0195212	0.45535	NoSig	TBC1D1
CDK13	1558.89	0.327605	0.241271	1.35783	0.174519	0.797646	NoSig	CDK13
MTHFD2	966.307	0.229693	0.334023	0.687657	0.491669	0.939718	NoSig	MTHFD2
SLC9A7	49.7705	0.272567	0.696639	0.39126	0.695605	0.96552	NoSig	SLC9A7
FOXJ2	1310.89	-0.44958	0.25107	-1.79066	0.0733482	0.667129	NoSig	FOXJ2
YBX1	21436.7	0.0380416	0.246478	0.154341	0.877341	0.990113	NoSig	YBX1
PDE4A	1225.05	0.160807	0.382624	0.420275	0.674285	0.963324	NoSig	PDE4A
PPP2R5A	2196.85	0.119402	0.382542	0.312127	0.754944	0.979625	NoSig	PPP2R5A
CTNNA2	63.5836	-1.35048	0.836858	-1.61375	0.106582	0.737976	NoSig	CTNNA2
ELAVL1	3734.43	-0.0217901	0.184513	-0.118096	0.905992	0.991893	NoSig	ELAVL1
TIE1	336.094	-0.405397	0.475129	-0.853235	0.393529	0.913674	NoSig	TIE1
DIP2B	2816.75	0.105195	0.307241	0.342386	0.73206	0.974177	NoSig	DIP2B
SMARCD1	4370.16	-0.163513	0.271857	-0.601467	0.547529	0.945449	NoSig	SMARCD1
KDM4A	2083.27	-0.2581	0.317377	-0.813228	0.416087	0.920903	NoSig	KDM4A
NFYC	2756.01	-0.544512	0.282345	-1.92854	0.0537883	0.608027	NoSig	NFYC
ZMYND12	173.698	-0.435983	0.384972	-1.13251	0.257422	0.861068	NoSig	ZMYND12
SLC9A3	787.152	1.46724	0.765349	1.91708	0.0552279	0.611554	NoSig	SLC9A3
NGEF	18.7851	-0.447066	0.763996	-0.585168	0.558435	0.947012	NoSig	NGEF
ASPM	101.161	0.609968	0.723897	0.842616	0.399443	0.91622	NoSig	ASPM
CD84	129.166	0.260901	0.660926	0.394751	0.693027	0.965489	NoSig	CD84
ELOVL1	2917.56	-0.196519	0.336387	-0.584207	0.559081	0.947012	NoSig	ELOVL1
SPI1	645.996	-0.436879	0.567411	-0.769952	0.441328	0.926696	NoSig	SPI1
ZNRD1	1240.98	-0.158269	0.355401	-0.445325	0.656085	0.960361	NoSig	ZNRD1
MPPED2	283.657	-3.51817	1.01899	-3.45259	0.000555225	0.0898417	NoSig	MPPED2
CLDN18	3.58627	0.473296	0.823289	0.574884	0.56537	0.948599	NoSig	CLDN18
ZBTB11	358.475	-0.183418	0.471625	-0.388906	0.697346	0.965871	NoSig	ZBTB11
ATXN3	550.31	0.200337	0.298598	0.670925	0.502269	0.941586	NoSig	ATXN3
GOLGA5	1220.47	0.147117	0.294219	0.500028	0.617055	0.954299	NoSig	GOLGA5
FGFR2	275.204	0.496011	0.763273	0.649848	0.51579	0.943248	NoSig	FGFR2
LRRC40	163.431	0.35652	0.515474	0.691634	0.489167	0.939718	NoSig	LRRC40
ISOC1	345.068	-0.099416	0.230691	-0.430949	0.666505	0.961525	NoSig	ISOC1
EML1	351.846	-0.736461	0.47526	-1.5496	0.121238	0.756261	NoSig	EML1
TRMT11	154.003	0.324107	0.397245	0.815889	0.414564	0.920542	NoSig	TRMT11
THUMPD1	1329.04	0.139789	0.300743	0.464811	0.642067	0.957483	NoSig	THUMPD1
MSANTD3	789.084	-0.0747181	0.237366	-0.314781	0.752928	0.978952	NoSig	MSANTD3
KIF26A	315.059	0.476354	0.537457	0.886312	0.37545	0.908939	NoSig	KIF26A
ATG2B	1178.52	0.213279	0.343773	0.620408	0.534989	0.943377	NoSig	ATG2B
ARFGEF1	2454.83	0.72686	0.593903	1.22387	0.221001	0.837917	NoSig	ARFGEF1
ACSM2B	0.251859	-0.76375	2.13397	-0.357901	0.720417	NA	NA	ACSM2B
ZFAT	943.83	0.0673064	0.242662	0.277367	0.781498	0.982068	NoSig	ZFAT
MTFR1	711.232	0.627741	0.503357	1.24711	0.212358	0.832224	NoSig	MTFR1
STAG3	97.5693	-0.369569	0.408296	-0.90515	0.365386	0.904055	NoSig	STAG3
FECH	874.373	0.147894	0.229093	0.645562	0.518563	0.943248	NoSig	FECH
MYO9A	764.209	0.135869	0.332297	0.408878	0.682629	0.9644	NoSig	MYO9A
DDX3Y	456.173	-2.94336	1.71466	-1.71659	0.0860549	0.695417	NoSig	DDX3Y
PFKP	3809.47	0.682073	0.540063	1.26295	0.206607	0.829318	NoSig	PFKP
IDI1	968.889	0.0634843	0.34285	0.185166	0.853099	0.988474	NoSig	IDI1
SP100	1899.31	0.293133	0.321224	0.912551	0.361479	0.903682	NoSig	SP100
KLF6	2767.51	0.094848	0.313084	0.302948	0.76193	0.980069	NoSig	KLF6
PLPP1	602.31	-0.271039	0.355533	-0.762346	0.445854	0.928642	NoSig	PLPP1
NEO1	8161.28	-0.712734	0.45115	-1.57982	0.114149	0.746844	NoSig	NEO1
TRAM1	7006.1	0.862179	0.445516	1.93524	0.0529613	0.603881	NoSig	TRAM1
PHKA1	403.156	-2.08126	0.750543	-2.773	0.00555422	0.28395	NoSig	PHKA1
TNFRSF1A	3465.43	0.153234	0.331707	0.461958	0.644112	0.957549	NoSig	TNFRSF1A
CACNB1	133.954	0.324017	0.493984	0.655926	0.511872	0.943106	NoSig	CACNB1
EVI5	371.917	0.00991901	0.463232	0.0214126	0.982917	0.99798	NoSig	EVI5
STOML1	740.44	-0.351091	0.291765	-1.20333	0.228847	0.843258	NoSig	STOML1
PKM	40797.1	0.0505839	0.38281	0.132138	0.894875	0.991023	NoSig	PKM
DHX29	891.402	0.246921	0.325592	0.758374	0.448227	0.928992	NoSig	DHX29
DNTTIP2	982.411	0.255797	0.461918	0.55377	0.579736	0.949701	NoSig	DNTTIP2
METTL22	613.693	-0.334395	0.259049	-1.29085	0.196755	0.819549	NoSig	METTL22
TP53BP1	1297.67	0.174932	0.258196	0.677517	0.498078	0.940996	NoSig	TP53BP1
TRO	615.545	-0.326096	0.382906	-0.851635	0.394417	0.913737	NoSig	TRO
RRP15	706.294	0.305335	0.293076	1.04183	0.29749	0.882263	NoSig	RRP15
RHOA	15677.2	-0.118436	0.277563	-0.426699	0.669599	0.962006	NoSig	RHOA
DHX8	2767.49	-0.0570534	0.271506	-0.210136	0.833561	0.985978	NoSig	DHX8
PMS2P4	116.09	-0.266412	0.290333	-0.917608	0.358824	0.90275	NoSig	PMS2P4
PRKCZ	1027.14	-0.794272	0.528751	-1.50217	0.133054	0.770197	NoSig	PRKCZ
ZFY	69.4213	-2.80928	1.82242	-1.54151	0.123193	0.757675	NoSig	ZFY
IARS2	3620.67	0.401597	0.285819	1.40508	0.159998	0.787336	NoSig	IARS2
SYT1	27.913	-1.05052	1.24824	-0.841605	NA	NA	NA	SYT1
NAV3	144.662	-1.4158	0.624092	-2.26857	0.0232946	0.490172	NoSig	NAV3
IDH3G	7277.91	-0.0466215	0.474639	-0.0982253	0.921753	0.993572	NoSig	IDH3G
ROGDI	424.874	-0.266771	0.325067	-0.820664	0.411838	0.919245	NoSig	ROGDI
PDZD4	1289.93	-0.258819	0.483818	-0.534951	0.592684	0.952731	NoSig	PDZD4
ATP2B3	146.425	-0.102248	0.947739	-0.107886	0.914086	0.993508	NoSig	ATP2B3
ROCK1	835.133	0.250471	0.430054	0.582419	0.560285	0.947053	NoSig	ROCK1
CBFB	960.344	0.548501	0.356242	1.53969	0.123637	0.757811	NoSig	CBFB
PDK3	204.451	-0.113629	0.31594	-0.359653	0.719107	0.971371	NoSig	PDK3
HYAL2	1176.72	-0.79113	0.370591	-2.13478	0.0327791	0.540057	NoSig	HYAL2
HDAC4	4185.44	0.448327	0.388715	1.15336	0.248763	0.857925	NoSig	HDAC4
RASSF1	979.295	-0.403676	0.306609	-1.31658	0.187978	0.810804	NoSig	RASSF1
FGFR3	455.006	0.215394	0.556101	0.387328	0.698513	0.966493	NoSig	FGFR3
IFI35	1980.67	0.376168	0.48085	0.782297	0.43404	0.924886	NoSig	IFI35
HEATR6	712.865	-0.207219	0.197808	-1.04758	0.294834	0.882263	NoSig	HEATR6
COASY	4465.61	-0.137869	0.291877	-0.472354	0.636674	0.956742	NoSig	COASY
PLEKHH3	877.76	0.197343	0.29308	0.67334	0.500731	0.941586	NoSig	PLEKHH3
MEF2A	886.842	0.265083	0.348705	0.760193	0.447139	0.928751	NoSig	MEF2A
OTUD5	4232.36	-0.42869	0.361037	-1.18739	0.235075	0.847111	NoSig	OTUD5
TFE3	3015.55	-0.247628	0.3103	-0.79803	0.424853	0.922727	NoSig	TFE3
TBC1D25	1201.49	-0.313485	0.32102	-0.976529	0.328802	0.892452	NoSig	TBC1D25
ACSL4	701.772	0.458218	0.466679	0.981868	0.326165	0.891646	NoSig	ACSL4
INPP5A	1578.75	0.139004	0.170489	0.815328	0.414885	0.920542	NoSig	INPP5A
GPKOW	1020.25	-0.0794044	0.211106	-0.376135	0.706816	0.968517	NoSig	GPKOW
GRIPAP1	2375.8	-0.0421601	0.199078	-0.211777	0.832281	0.985954	NoSig	GRIPAP1
FTSJ1	1289.51	0.163197	0.189142	0.862826	0.388233	0.912489	NoSig	FTSJ1
PRR11	132.549	-0.128094	0.43817	-0.292339	0.770028	0.980807	NoSig	PRR11
REEP1	178.176	0.918932	0.725479	1.26665	0.205279	0.828896	NoSig	REEP1
ATP11A	3672.05	-0.462324	0.419704	-1.10155	0.270658	0.867849	NoSig	ATP11A
POLR1A	4799.52	-0.296579	0.283887	-1.04471	0.296158	0.882263	NoSig	POLR1A
LAPTM4A	11291.1	-0.033038	0.157482	-0.209789	0.833833	0.985978	NoSig	LAPTM4A
TTC7A	403.15	-0.0587167	0.322704	-0.181952	0.85562	0.988624	NoSig	TTC7A
IP6K2	1434.09	-0.571762	0.298735	-1.91394	0.0556274	0.612893	NoSig	IP6K2
STON1-GTF2A1L	3.36126	-0.545482	0.984982	-0.553799	0.579717	0.949701	NoSig	STON1-GTF2A1L
SRBD1	547.43	0.0097099	0.289053	0.0335921	0.973202	0.99798	NoSig	SRBD1
KIF2A	438.142	0.239116	0.380391	0.628606	0.529607	0.943248	NoSig	KIF2A
RASGRP2	58.0537	0.323469	0.577084	0.560523	0.575123	0.949525	NoSig	RASGRP2
PSME4	2223.09	0.630581	0.41741	1.5107	0.130865	0.766008	NoSig	PSME4
IFT80	169.829	-0.0778637	0.497404	-0.15654	0.875607	0.989927	NoSig	IFT80
SIRT2	3897.13	-0.292432	0.315373	-0.92726	0.353791	0.900542	NoSig	SIRT2
ERLEC1	1071.69	0.181109	0.326225	0.555165	0.578782	0.949701	NoSig	ERLEC1
PPP2R5B	1493.93	-0.946229	0.41115	-2.30142	0.0213678	0.476361	NoSig	PPP2R5B
PYGM	97.0556	0.882992	0.638737	1.3824	0.166848	0.792136	NoSig	PYGM
PAGE1	0.394344	-0.964568	2.6502	-0.36396	0.715888	NA	NA	PAGE1
PITX1	47.9745	0.280349	0.759556	0.369096	0.712057	0.970124	NoSig	PITX1
TRPC7	0.32503	-1.45073	2.32337	-0.624406	0.532361	NA	NA	TRPC7
MAST4	178.923	-0.808309	0.432319	-1.8697	0.0615249	0.632382	NoSig	MAST4
ADGRF5	241.968	-0.459421	0.483807	-0.949597	0.342317	0.895693	NoSig	ADGRF5
SDK2	230.982	-0.251827	0.762453	-0.330285	0.741184	0.976112	NoSig	SDK2
ADAM7	0.0109356	-0.192369	5.65541	-0.0340151	0.972865	NA	NoSig	ADAM7
NUP133	1998.31	0.15188	0.257776	0.589192	0.555732	0.94648	NoSig	NUP133
NUCKS1	8639.87	0.0870365	0.241531	0.360353	0.718583	0.971371	NoSig	NUCKS1
VPS35	4180.19	-0.0568217	0.24884	-0.228346	0.819377	0.984484	NoSig	VPS35
DNAJA2	1947.63	0.0458414	0.313561	0.146196	0.883767	0.990625	NoSig	DNAJA2
BCL3	606.288	0.315515	0.494621	0.637891	0.523545	0.943248	NoSig	BCL3
KCNAB2	29472.4	-0.469301	0.392174	-1.19666	0.231438	0.843961	NoSig	KCNAB2
ABCC9	54.6019	0.84807	0.605926	1.39963	0.161625	0.787401	NoSig	ABCC9
GAL	336.143	-0.236884	0.689137	-0.34374	0.731042	0.973744	NoSig	GAL
CLEC2D	191.571	-0.100788	0.738591	-0.13646	0.891457	0.991023	NoSig	CLEC2D
FUNDC1	569.593	-0.127449	0.322112	-0.395665	0.692352	0.965489	NoSig	FUNDC1
MAOB	59.4139	-0.420621	0.940195	-0.447376	0.654604	0.960361	NoSig	MAOB
RORA	199.323	0.216118	0.442585	0.488309	0.625331	0.955171	NoSig	RORA
DRD4	57.489	-0.49323	0.478392	-1.03102	0.302533	0.88423	NoSig	DRD4
TGFBR3	781.497	-0.0289698	0.363988	-0.07959	0.936563	0.995665	NoSig	TGFBR3
PLA2G10	1.42051	0.0426914	0.782003	0.0545924	0.956463	NA	NoSig	PLA2G10
HES2	20.6011	1.21577	0.860122	1.41349	0.157512	0.786744	NoSig	HES2
ATP1B3	2923.48	0.318452	0.234301	1.35916	0.174096	0.797211	NoSig	ATP1B3
NEDD4	220.75	0.447305	0.436415	1.02495	0.305386	0.884649	NoSig	NEDD4
PIGB	475.638	0.442965	0.292187	1.51603	0.129512	0.764574	NoSig	PIGB
MAPK6	626.036	0.372949	0.464618	0.802701	0.422148	0.921897	NoSig	MAPK6
GNB5	745.57	0.385861	0.379607	1.01648	0.309403	0.885314	NoSig	GNB5
RAB27A	3370.22	0.229091	0.398032	0.57556	0.564913	0.9484	NoSig	RAB27A
HDHD5	1423.76	-0.229838	0.232533	-0.988411	0.322951	0.89052	NoSig	HDHD5
UFD1	1978.9	0.0351204	0.179439	0.195724	0.844826	0.986917	NoSig	UFD1
LRP6	850.93	-0.049616	0.310009	-0.160047	0.872844	0.989586	NoSig	LRP6
GUCY2C	11.3622	0.82695	0.640857	1.29038	0.196918	0.819549	NoSig	GUCY2C
SCT	17.3429	-0.830327	0.95149	-0.87266	0.382848	0.911348	NoSig	SCT
PHRF1	3584.22	-0.342859	0.296292	-1.15717	0.247204	0.856193	NoSig	PHRF1
ELP1	1446.13	-0.0762885	0.231823	-0.329081	0.742095	0.97626	NoSig	ELP1
NUCB2	811.432	0.44829	0.436657	1.02664	0.304589	0.884649	NoSig	NUCB2
PFN2	1869.09	0.0519636	0.362181	0.143474	0.885916	0.990625	NoSig	PFN2
PTPN3	695.423	-0.11777	0.448077	-0.262834	0.792678	0.982068	NoSig	PTPN3
SPTB	32.8851	0.000384555	0.533131	0.000721315	0.999424	0.999778	NoSig	SPTB
DAPP1	13.148	0.603648	0.979344	0.61638	0.537644	0.94386	NoSig	DAPP1
FGF10	0.235232	0.254425	2.31297	0.109999	0.91241	NA	NoSig	FGF10
SLC44A1	868.842	0.10857	0.366835	0.295964	0.767258	0.980568	NoSig	SLC44A1
TMEM260	644.988	0.289237	0.363118	0.796537	0.42572	0.922727	NoSig	TMEM260
SMG6	1693.86	-0.542857	0.391909	-1.38516	0.166004	0.791208	NoSig	SMG6
EXOC5	986.118	0.448638	0.387323	1.1583	0.24674	0.855431	NoSig	EXOC5
CLTCL1	316.583	-0.573572	0.323999	-1.77029	0.076679	0.67579	NoSig	CLTCL1
FGF22	10.1869	-0.652754	0.604986	-1.07896	0.280607	0.875443	NoSig	FGF22
FSTL3	3005.39	-1.25733	0.529843	-2.37302	0.0176434	0.435951	NoSig	FSTL3
DGCR2	6360.31	-0.186344	0.234028	-0.796248	0.425888	0.922727	NoSig	DGCR2
RNF126	1574.77	-0.0466589	0.271704	-0.171727	0.863652	0.989237	NoSig	RNF126
MNT	3246.08	-0.516039	0.282394	-1.82737	0.0676437	0.650401	NoSig	MNT
ZXDC	767.525	-0.569594	0.279268	-2.0396	0.0413904	0.572014	NoSig	ZXDC
JMJD6	740.356	0.180717	0.196992	0.917385	0.358941	0.90275	NoSig	JMJD6
POLB	1108.56	-0.223021	0.376894	-0.591735	0.554028	0.946324	NoSig	POLB
ST6GALNAC1	5.48733	-1.69715	0.988078	-1.71763	0.085864	0.695046	NoSig	ST6GALNAC1
WIPI1	2003.46	0.196508	0.464693	0.422878	0.672384	0.962739	NoSig	WIPI1
FRMPD1	21.7908	-0.719798	0.907248	-0.793386	0.427553	0.92299	NoSig	FRMPD1
GBA2	3180.88	-0.178733	0.225069	-0.794127	0.427121	0.922727	NoSig	GBA2
NDST1	6132.86	-0.0407693	0.333073	-0.122403	0.90258	0.991542	NoSig	NDST1
ASNS	321.727	-0.214008	0.485666	-0.440649	0.659467	0.9605	NoSig	ASNS
AP3M2	1652.5	-0.504724	0.357312	-1.41256	0.157785	0.786744	NoSig	AP3M2
CNGB1	8.7809	-0.847296	1.42054	-0.596462	0.550867	0.945772	NoSig	CNGB1
ST6GALNAC2	17375.4	-0.362153	0.385013	-0.940626	0.346896	0.897218	NoSig	ST6GALNAC2
CHAT	0.539083	-1.85296	2.33677	-0.792956	0.427803	NA	NA	CHAT
PABPC1	116703	0.514912	0.325012	1.58429	0.113129	0.743739	NoSig	PABPC1
TESK2	280.869	-0.640921	0.494089	-1.29718	0.19457	0.816885	NoSig	TESK2
CFAP20	888.882	-0.0935733	0.194049	-0.482215	0.629653	0.955528	NoSig	CFAP20
CSNK2A2	4856.15	-0.34442	0.338569	-1.01728	0.309019	0.885314	NoSig	CSNK2A2
PTPN21	525.316	-0.706711	0.41118	-1.71874	0.0856617	0.695046	NoSig	PTPN21
EIF2B3	729.707	0.0115474	0.271032	0.0426051	0.966016	0.99798	NoSig	EIF2B3
CAMK2A	78.5879	0.736991	0.627973	1.1736	0.240555	0.851292	NoSig	CAMK2A
TCOF1	3813.53	-0.220783	0.247153	-0.893307	0.371693	0.906696	NoSig	TCOF1
CDC42	4545.56	-0.0516609	0.24284	-0.212736	0.831533	0.985718	NoSig	CDC42
OSBPL3	182.621	0.58333	0.544343	1.07162	0.28389	0.876684	NoSig	OSBPL3
EPHA8	56.4532	0.838856	0.956198	0.877283	0.380333	0.910722	NoSig	EPHA8
SLC12A3	1.50615	0.119273	1.10166	0.108267	0.913784	NA	NoSig	SLC12A3
RAD18	267.088	-0.290373	0.346859	-0.837148	0.402509	0.916548	NoSig	RAD18
ATP2B1	803.855	0.632716	0.389415	1.62478	0.104209	0.7339	NoSig	ATP2B1
TRPM5	1.21335	0.463828	1.04353	0.444478	0.656697	NA	NoSig	TRPM5
NCK2	2008.44	-0.128515	0.254003	-0.505957	0.612887	0.953876	NoSig	NCK2
MAP4K4	7073.57	-0.118879	0.188537	-0.630535	0.528345	0.943248	NoSig	MAP4K4
MGAT4A	1279.38	0.550766	0.400139	1.37644	0.168687	0.794241	NoSig	MGAT4A
RPL31	54577.3	0.146466	0.337842	0.433533	0.664628	0.961129	NoSig	RPL31
WDR1	20768.9	-0.187695	0.259328	-0.723777	0.469202	0.934966	NoSig	WDR1
SNX13	693.927	0.433446	0.422329	1.02632	0.304739	0.884649	NoSig	SNX13
MS4A12	1.30849	1.44476	0.789947	1.82893	0.0674099	NA	NA	MS4A12
ARHGAP10	577.501	0.436442	0.321724	1.35657	0.174917	0.797646	NoSig	ARHGAP10
RPS6KA2	1581.04	1.27678	0.65175	1.95901	0.0501116	0.596077	NoSig	RPS6KA2
ING3	348.317	0.135096	0.304238	0.444046	0.657009	0.960361	NoSig	ING3
VASH1	504.804	-0.42864	0.448749	-0.955188	0.339483	0.895532	NoSig	VASH1
LMCD1	786.548	-1.15468	0.722042	-1.59919	0.109779	0.740264	NoSig	LMCD1
BUD23	4548.56	0.290739	0.190065	1.52968	0.126096	0.758431	NoSig	BUD23
SEL1L	2942.51	0.18728	0.330041	0.567444	0.570412	0.949513	NoSig	SEL1L
TRIP13	187.151	-0.0898066	0.341836	-0.262718	0.792768	0.982072	NoSig	TRIP13
ATP6AP1	14351.7	0.0154071	0.409743	0.0376018	0.970005	0.99798	NoSig	ATP6AP1
TCF3	2267.04	0.0285307	0.279574	0.102051	0.918716	0.993572	NoSig	TCF3
TRIB2	10029.6	-0.522714	0.54448	-0.960025	0.337042	0.894562	NoSig	TRIB2
DAZAP1	4724.96	-0.102621	0.194863	-0.526632	0.598449	0.952731	NoSig	DAZAP1
MBD3	7449.76	-0.193983	0.365327	-0.530986	0.595428	0.952731	NoSig	MBD3
PRLH	0.570427	-1.18876	1.8182	-0.653812	0.513233	NA	NA	PRLH
HLTF	541.954	-0.0474128	0.447939	-0.105847	0.915704	0.993508	NoSig	HLTF
FAM50A	5097.03	0.00410246	0.296854	0.0138198	0.988974	0.998424	NoSig	FAM50A
FAM3A	3498.26	0.0882559	0.344784	0.255974	0.797971	0.982993	NoSig	FAM3A
CPSF1	7738.16	-0.0439797	0.301557	-0.145842	0.884046	0.990625	NoSig	CPSF1
MYO3B	1.25927	-1.09552	1.33665	-0.819603	0.412443	NA	NA	MYO3B
CYBRD1	1908.86	0.0366812	0.722562	0.0507654	0.959512	0.99798	NoSig	CYBRD1
CDH19	2326.88	0.202931	0.680004	0.298427	0.765377	0.980568	NoSig	CDH19
PDCD2	1771.83	-0.270514	0.313358	-0.863273	0.387987	0.912489	NoSig	PDCD2
SLC6A15	2881.95	-0.959112	0.525766	-1.82422	0.0681189	0.650401	NoSig	SLC6A15
RDH11	1852.98	0.172719	0.359192	0.480854	0.63062	0.955528	NoSig	RDH11
PRKACA	6668.12	-0.232714	0.313197	-0.743029	0.457464	0.931089	NoSig	PRKACA
ADGRL1	2509.26	-0.333987	0.331591	-1.00723	0.313826	0.887178	NoSig	ADGRL1
SPP2	0	NA	NA	NA	NA	NA	NA	SPP2
ACTN1	8340.39	0.104544	0.358241	0.291826	0.770419	0.980807	NoSig	ACTN1
ZFYVE26	2708.48	-0.153824	0.201747	-0.762458	0.445787	0.928642	NoSig	ZFYVE26
RPS6KA6	32.7002	-0.313089	0.667961	-0.468723	0.639267	0.957373	NoSig	RPS6KA6
EPN2	704.876	0.00400255	0.175688	0.0227821	0.981824	0.99798	NoSig	EPN2
PTPN18	3533.21	0.105876	0.350933	0.301697	0.762883	0.980467	NoSig	PTPN18
LIMS2	5356.84	-3.49331	0.854067	-4.09021	4.30986e-05	0.0339929	Down	LIMS2
ASIC4	40.991	-0.131705	0.811439	-0.16231	0.871062	0.989412	NoSig	ASIC4
SPEG	195.751	-0.166242	0.408356	-0.407101	0.683934	0.964414	NoSig	SPEG
LNX1	53.6548	0.284386	0.373448	0.761515	0.446349	0.928675	NoSig	LNX1
ALDH3A2	1412.8	-0.0197992	0.28578	-0.0692813	0.944766	0.995992	NoSig	ALDH3A2
TFRC	985.097	0.616731	0.4641	1.32888	0.183889	0.806272	NoSig	TFRC
SREBF1	12509.1	-0.219456	0.366717	-0.598435	0.54955	0.945705	NoSig	SREBF1
TRPC5	0.234524	-1.03715	1.79335	-0.57833	0.563041	NA	NA	TRPC5
AFF4	2587.3	0.25713	0.374113	0.687307	0.491889	0.939718	NoSig	AFF4
UBE2D1	368.409	-0.0281234	0.277681	-0.101279	0.919329	0.993572	NoSig	UBE2D1
MPP5	737.58	-0.0325926	0.305807	-0.106579	0.915123	0.993508	NoSig	MPP5
RHOBTB1	1006.99	-0.468015	0.351581	-1.33117	0.183132	0.804931	NoSig	RHOBTB1
SMC1A	3018.5	-0.134871	0.222911	-0.605045	0.545149	0.945449	NoSig	SMC1A
HSD17B10	3674.74	-0.0683482	0.352447	-0.193925	0.846235	0.98718	NoSig	HSD17B10
MARK2	2912.89	-0.244307	0.266874	-0.915438	0.359962	0.903578	NoSig	MARK2
HMMR	55.5081	0.224784	0.726609	0.30936	0.757048	0.979952	NoSig	HMMR
CHFR	716.693	-0.210406	0.179888	-1.16965	0.242141	0.853387	NoSig	CHFR
TRHDE	2.01561	-0.917074	1.0735	-0.854281	0.39295	0.913674	NoSig	TRHDE
P4HA2	1154.85	0.363531	0.426584	0.852189	0.394109	0.913737	NoSig	P4HA2
FCGR2B	54.5451	-1.23631	0.835725	-1.47933	0.139053	0.775202	NoSig	FCGR2B
NFATC3	513.454	-0.302312	0.230235	-1.31306	0.189163	0.811963	NoSig	NFATC3
TRNT1	321.077	0.244733	0.326565	0.749415	0.453607	0.929424	NoSig	TRNT1
ACADVL	10262.6	0.226245	0.348676	0.648868	0.516423	0.943248	NoSig	ACADVL
STK10	6883.54	0.311505	0.4057	0.767821	0.442593	0.927319	NoSig	STK10
FBXW11	1817.53	-0.0270866	0.199353	-0.135872	0.891922	0.991023	NoSig	FBXW11
ACAP1	173.307	0.171584	0.558033	0.307481	NA	NA	NoSig	ACAP1
CRMP1	816.165	-0.0811988	0.357643	-0.227039	0.820394	0.984564	NoSig	CRMP1
EVC	2123.12	-0.222985	0.456312	-0.488667	0.625078	0.955171	NoSig	EVC
DERL2	1579.1	0.226631	0.185316	1.22295	0.22135	0.837933	NoSig	DERL2
SIDT1	35.3464	-0.421762	0.570388	-0.73943	0.459646	0.9316	NoSig	SIDT1
NDE1	1687.55	-0.0254421	0.303481	-0.0838341	0.933188	0.995459	NoSig	NDE1
MRVI1	119.254	-0.441599	0.464007	-0.951709	0.341244	0.895664	NoSig	MRVI1
TMEM38A	193.933	-0.763416	0.468901	-1.6281	0.103505	0.733073	NoSig	TMEM38A
AP1M1	4545.75	-0.0444396	0.292884	-0.151731	0.879399	0.990382	NoSig	AP1M1
PVR	1454.09	-0.112812	0.238964	-0.472087	0.636865	0.956742	NoSig	PVR
XRCC1	3286.91	-0.121326	0.345254	-0.35141	0.725281	0.97264	NoSig	XRCC1
SCARB1	13372.4	0.555193	0.346047	1.60439	0.108629	0.737976	NoSig	SCARB1
CYP2W1	9.99812	-0.277479	0.682026	-0.406846	0.684121	0.964414	NoSig	CYP2W1
MCM2	1478.11	-0.923143	0.418709	-2.20474	0.0274727	0.512559	NoSig	MCM2
MOV10L1	20.6706	0.578838	0.958827	0.603694	0.546047	0.945449	NoSig	MOV10L1
PANX2	305.34	0.196352	0.693036	0.283322	0.77693	0.982068	NoSig	PANX2
SELENOO	1510.31	0.0613634	0.30335	0.202286	0.839693	0.98646	NoSig	SELENOO
TP63	9.18256	-1.28913	0.724247	-1.77995	0.0750835	0.670069	NoSig	TP63
ALPK1	617.353	0.391196	0.293875	1.33116	0.183136	0.804931	NoSig	ALPK1
LLGL2	329.206	-0.201463	0.269735	-0.746893	0.455128	0.929712	NoSig	LLGL2
PDE8A	1415.39	-0.0823946	0.336036	-0.245196	0.806305	0.983492	NoSig	PDE8A
CLCN4	148.57	0.912554	0.734519	1.24238	0.214095	0.833389	NoSig	CLCN4
NLE1	2495.1	-0.325322	0.395432	-0.822699	0.410679	0.918856	NoSig	NLE1
SDHA	9408.74	0.288203	0.273944	1.05205	0.292776	0.881371	NoSig	SDHA
SMARCE1	1603.35	0.106653	0.23366	0.456445	0.64807	0.958383	NoSig	SMARCE1
FNDC8	3.29716	-0.613598	0.779574	-0.787094	0.431227	0.924717	NoSig	FNDC8
GSDMB	70.1014	-0.223667	0.738436	-0.302893	0.761971	0.980069	NoSig	GSDMB
KDM5A	1512.97	0.10749	0.24154	0.445021	0.656305	0.960361	NoSig	KDM5A
ADAM11	508.87	0.417694	0.713269	0.585605	0.558141	0.946997	NoSig	ADAM11
PPP2R3A	674.204	0.183249	0.33354	0.549404	0.582728	0.950484	NoSig	PPP2R3A
FERMT2	824.515	0.486726	0.380698	1.27851	0.20107	0.824872	NoSig	FERMT2
ABCB11	0.195543	0.675878	3.00863	0.224646	0.822255	NA	NA	ABCB11
DHRS9	11.8075	0.248767	1.02049	0.243773	0.807406	0.983492	NoSig	DHRS9
CD5L	11.3424	2.58034	1.56908	1.64449	NA	NA	NA	CD5L
PTGS2	12.0643	0.0482324	0.804897	0.0599237	0.952216	0.99705	NoSig	PTGS2
IGF2BP2	1473.24	-0.589704	0.389506	-1.51398	0.130031	0.764574	NoSig	IGF2BP2
MAP3K13	831.171	-0.702363	0.385905	-1.82004	0.0687524	0.650401	NoSig	MAP3K13
ST6GAL1	1709.8	-0.588913	0.465538	-1.26502	0.205865	0.829318	NoSig	ST6GAL1
TBX21	19.0366	0.9353	0.909164	1.02875	0.303598	0.884516	NoSig	TBX21
VDAC1P1	7.06773	0.697397	0.502219	1.38863	0.164945	0.78977	NoSig	VDAC1P1
FRY	515.058	1.29813	0.469555	2.7646	0.00569919	0.28444	NoSig	FRY
PICALM	3722.63	-0.103276	0.256758	-0.40223	0.687515	0.964678	NoSig	PICALM
NSF	1249.2	0.28055	0.316394	0.886712	0.375234	0.908939	NoSig	NSF
GLI2	61.1562	0.386102	0.714192	0.540615	0.588773	0.951423	NoSig	GLI2
CLASP1	2591.61	-0.126915	0.161902	-0.783901	0.433098	0.924815	NoSig	CLASP1
MRPS34	4319.82	0.239762	0.322875	0.742585	0.457733	0.931159	NoSig	MRPS34
NOTCH3	1991.17	0.139164	0.530109	0.262519	0.792921	0.982209	NoSig	NOTCH3
CLNS1A	2287.79	0.193709	0.185369	1.04499	0.296026	0.882263	NoSig	CLNS1A
PPP2R2C	28.3796	0.35396	0.87663	0.403773	0.686379	0.964678	NoSig	PPP2R2C
TEAD2	2564	-0.796464	0.396724	-2.0076	0.0446854	0.578888	NoSig	TEAD2
EED	583.782	0.129091	0.254751	0.506733	0.612342	0.953876	NoSig	EED
CDHR2	31.6358	-0.581551	0.550594	-1.05622	0.290866	0.880192	NoSig	CDHR2
SNCB	364.199	-0.888268	0.845724	-1.05031	0.293578	0.88156	NoSig	SNCB
TSG101	3354.74	-0.0308465	0.171772	-0.179579	0.857483	0.988669	NoSig	TSG101
NCBP3	1604.99	0.043918	0.289986	0.151449	0.879622	0.990409	NoSig	NCBP3
ATP2A3	675.034	0.0102193	0.512257	0.0199496	0.984084	0.99798	NoSig	ATP2A3
CA12	582.282	3.88539	1.06117	3.66141	NA	NA	NA	CA12
MGLL	2334.47	0.752893	0.793976	0.948257	0.342999	0.895738	NoSig	MGLL
NTN4	290.149	0.3154	0.560989	0.562221	0.573966	0.949525	NoSig	NTN4
BCS1L	1548.6	0.00257433	0.237079	0.0108585	0.991336	0.999099	NoSig	BCS1L
NUAK1	117.675	-0.199384	0.352508	-0.565616	0.571655	0.949525	NoSig	NUAK1
DPP8	1072.1	0.256524	0.326691	0.785218	0.432326	0.924789	NoSig	DPP8
SLC24A1	818.189	-0.161464	0.326192	-0.494998	0.620602	0.954849	NoSig	SLC24A1
ZNF532	1680.66	-0.895258	0.51888	-1.72537	0.0844615	0.691109	NoSig	ZNF532
SCARF1	209.087	-0.226794	0.485885	-0.466764	0.640668	0.95743	NoSig	SCARF1
LMAN1	2514.75	0.404153	0.4204	0.961356	0.336373	0.894562	NoSig	LMAN1
HACD3	4000.06	0.148832	0.300627	0.495071	0.62055	0.954849	NoSig	HACD3
IPCEF1	14.3899	0.604033	0.862624	0.700227	0.483785	0.937818	NoSig	IPCEF1
ZZEF1	3229.54	-0.0805706	0.206828	-0.389553	0.696867	0.965646	NoSig	ZZEF1
NOX3	1.00548	-0.750198	1.4106	-0.531829	0.594845	NA	NA	NOX3
ENO1	62734.9	-0.346789	0.44879	-0.772719	0.439688	0.926227	NoSig	ENO1
SLC12A1	3.78048	-0.642999	1.0948	-0.587323	0.556986	0.94648	NoSig	SLC12A1
MYDGF	3177.21	0.242881	0.236666	1.02626	0.304769	0.884649	NoSig	MYDGF
ANO8	270.939	-0.950857	0.407037	-2.33604	0.019489	0.45535	NoSig	ANO8
TUBE1	248.854	0.317105	0.385843	0.82185	0.411163	0.918959	NoSig	TUBE1
ARHGEF10L	1561.66	-0.212622	0.317515	-0.669643	0.503085	0.941586	NoSig	ARHGEF10L
TXK	10.9258	-0.369728	0.680121	-0.543621	0.586702	0.950973	NoSig	TXK
WSCD2	24.6011	0.345619	1.9305	0.179031	0.857914	0.988771	NoSig	WSCD2
KCNQ2	89.8296	0.10436	1.16651	0.0894626	0.928714	0.994405	NoSig	KCNQ2
TACR2	235.92	-0.549919	0.536103	-1.02577	0.304999	0.884649	NoSig	TACR2
ACTR6	535.903	0.270806	0.284161	0.953001	0.34059	0.895664	NoSig	ACTR6
TIPIN	160.319	0.311432	0.252683	1.2325	0.217761	0.835319	NoSig	TIPIN
SRI	2149.39	0.231664	0.149165	1.55308	0.120405	0.756261	NoSig	SRI
EIF4G3	2520.2	-0.10832	0.396736	-0.273026	0.784833	0.982068	NoSig	EIF4G3
NUP37	486.969	0.186654	0.206707	0.902987	0.366533	0.904369	NoSig	NUP37
SEMA3A	30.1742	-0.434294	0.675967	-0.642479	0.520562	0.943248	NoSig	SEMA3A
GTSE1	220.029	0.451061	0.525103	0.858995	0.390343	0.913674	NoSig	GTSE1
SEMA3C	711.603	-2.34973	1.04203	-2.25495	0.0241363	0.49606	NoSig	SEMA3C
TTC38	1988.55	-0.0975144	0.318146	-0.306508	0.759218	0.979991	NoSig	TTC38
ACAT1	2080.96	0.283591	0.223122	1.27101	0.203724	0.828127	NoSig	ACAT1
GRAMD4	2319.27	0.0434378	0.296182	0.146659	0.883401	0.990625	NoSig	GRAMD4
CELSR1	1885.08	0.658968	0.586381	1.12379	0.261103	0.861218	NoSig	CELSR1
WNT8B	2.39994	-0.617346	0.872299	-0.707723	0.479117	0.93623	NoSig	WNT8B
ZNF638	2303.44	0.338765	0.421659	0.803409	0.421738	0.921897	NoSig	ZNF638
SLC25A40	359.563	0.100789	0.362491	0.278046	0.780977	0.982068	NoSig	SLC25A40
TIMM21	668.153	0.310597	0.230547	1.34722	0.177909	0.799969	NoSig	TIMM21
ADD2	80.2475	0.656146	0.677159	0.96897	0.33256	0.894355	NoSig	ADD2
FGF4	0.106872	-0.418671	3.99446	-0.104813	0.916524	NA	NoSig	FGF4
RASAL2	855.376	-0.0083121	0.425431	-0.0195381	0.984412	0.99798	NoSig	RASAL2
VPS9D1	1112.78	-0.545731	0.374245	-1.45822	0.14478	0.776993	NoSig	VPS9D1
ZNF37A	537.694	0.1175	0.383826	0.306129	0.759506	0.979991	NoSig	ZNF37A
MARK3	1868.43	0.269304	0.317824	0.847335	0.396808	0.91471	NoSig	MARK3
SLC25A3	30599.7	0.13873	0.250787	0.553178	0.580141	0.949794	NoSig	SLC25A3
FNDC3B	1000.12	0.231314	0.328574	0.703995	0.481436	0.936871	NoSig	FNDC3B
FOSL2	1362.6	-0.581819	0.428927	-1.35645	0.174955	0.797646	NoSig	FOSL2
CACNG5	12.3745	0.17861	0.967225	0.184662	0.853494	0.988529	NoSig	CACNG5
CACNG4	6.63617	-0.570128	0.815448	-0.699159	0.484452	0.938057	NoSig	CACNG4
FRYL	1656.79	0.0587597	0.4062	0.144657	0.884982	0.990625	NoSig	FRYL
TMEM131	2265.08	0.171643	0.231538	0.741317	0.458501	0.9316	NoSig	TMEM131
FSCN1	8818.43	-0.257156	0.482056	-0.533456	0.593718	0.952731	NoSig	FSCN1
ACTB	134944	0.162949	0.358859	0.454074	0.649775	0.959478	NoSig	ACTB
MOCOS	282.972	0.836943	0.398279	2.1014	0.0356059	0.552147	NoSig	MOCOS
PLD1	347.331	-0.213717	0.396106	-0.539547	0.58951	0.951444	NoSig	PLD1
ATP12A	1.17645	0.465532	1.51305	0.307678	0.758328	NA	NoSig	ATP12A
WDR62	203.314	-0.0930711	0.431328	-0.215778	0.829161	0.985497	NoSig	WDR62
DLG1	1114.67	-0.132246	0.444722	-0.297369	0.766185	0.980568	NoSig	DLG1
RAB7A	17851.6	-0.443461	0.288702	-1.53605	0.124526	0.758431	NoSig	RAB7A
BCAP29	824.087	0.67906	0.396262	1.71367	0.0865899	0.696934	NoSig	BCAP29
SEC31B	228.116	-0.428168	0.557334	-0.768243	0.442343	0.927314	NoSig	SEC31B
SART3	2322.92	0.024208	0.189399	0.127815	0.898296	0.991023	NoSig	SART3
ARHGAP15	66.9211	0.00914951	0.569298	0.0160716	0.987177	0.998106	NoSig	ARHGAP15
TUBA3D	6.94999	-0.824487	0.504913	-1.63293	0.102484	0.732052	NoSig	TUBA3D
PAX2	1.60719	-3.41819	2.04963	-1.66772	0.0953723	NA	NA	PAX2
EXOSC7	1182.72	-0.159606	0.264418	-0.603612	0.546102	0.945449	NoSig	EXOSC7
KIFAP3	1067.67	0.283052	0.242805	1.16576	0.243712	0.8544	NoSig	KIFAP3
MKRN2	1169.17	-0.914807	0.355545	-2.57297	0.0100829	0.353799	NoSig	MKRN2
MCM6	890.634	0.298403	0.285065	1.04679	0.295197	0.882263	NoSig	MCM6
REXO2	1131.84	-0.118602	0.228313	-0.519471	0.603432	0.952731	NoSig	REXO2
RBM7	416.485	0.172516	0.270607	0.637515	0.523789	0.943248	NoSig	RBM7
RBMS2	2128.62	-0.877544	0.340944	-2.57387	0.0100569	0.353799	NoSig	RBMS2
BAZ2A	4052.48	-0.10395	0.241795	-0.429909	0.667262	0.961947	NoSig	BAZ2A
PTPN23	7317.93	-1.02909	0.518023	-1.98657	0.0469705	0.586494	NoSig	PTPN23
MLH1	1012.21	-0.101801	0.214384	-0.474855	0.63489	0.956651	NoSig	MLH1
UNG	2517.61	0.0400179	0.270204	0.148103	0.882262	0.990625	NoSig	UNG
FMO4	545.902	-0.8452	0.377187	-2.2408	0.0250392	0.501372	NoSig	FMO4
KLHL20	306.829	0.192898	0.308962	0.624343	0.532402	0.943248	NoSig	KLHL20
RGS11	506.531	0.607537	0.638387	0.951675	0.341262	0.895664	NoSig	RGS11
SLC46A1	461.439	0.303478	0.32174	0.943238	0.345559	0.896635	NoSig	SLC46A1
PLXNA2	2613.88	-0.118612	0.611977	-0.193817	0.846319	0.98718	NoSig	PLXNA2
SPAG5	373.066	0.0990249	0.402932	0.245761	0.805867	0.983492	NoSig	SPAG5
ANKRD13A	1990.53	-0.26711	0.237164	-1.12627	0.260052	0.861068	NoSig	ANKRD13A
TPD52	444.233	1.13245	0.796318	1.42211	0.154994	0.785582	NoSig	TPD52
ACACB	1862.97	0.331302	0.398954	0.830427	0.406297	0.917372	NoSig	ACACB
TRAF4	3995.54	-0.204431	0.284692	-0.718079	0.472708	0.935901	NoSig	TRAF4
PAG1	2685.85	0.165694	0.49351	0.335746	0.737062	0.975078	NoSig	PAG1
GPATCH1	471.771	-0.0396125	0.200116	-0.197948	0.843086	0.986578	NoSig	GPATCH1
ICAM3	16.3448	1.1203	0.933293	1.20037	0.229995	0.843258	NoSig	ICAM3
NT5C2	1119.72	0.0251813	0.357575	0.0704226	0.943857	0.99592	NoSig	NT5C2
MCAM	9767.31	0.244331	0.52258	0.467547	0.640109	0.95743	NoSig	MCAM
GPC4	153.113	0.949351	0.768303	1.23565	0.21659	0.834894	NoSig	GPC4
MBNL3	55.1908	0.914277	0.712466	1.28326	0.199402	0.822347	NoSig	MBNL3
CAMSAP3	665.419	-2.4148	0.837311	-2.88399	0.00392665	0.236977	NoSig	CAMSAP3
RAP1GAP	2738.9	0.360951	0.489184	0.737864	0.460597	0.931827	NoSig	RAP1GAP
XAB2	6319.78	-0.606568	0.432606	-1.40212	0.160878	0.78739	NoSig	XAB2
ARHGEF1	4882.66	-0.415221	0.247572	-1.67717	0.0935085	0.711123	NoSig	ARHGEF1
STXBP2	2563	-0.31349	0.556331	-0.563495	0.573098	0.949525	NoSig	STXBP2
MAP2K7	2944.57	-0.173934	0.277077	-0.627748	0.530169	0.943248	NoSig	MAP2K7
NMRK2	679.562	-1.16245	0.727939	-1.5969	0.110288	0.740264	NoSig	NMRK2
DGKD	1071.19	-0.183647	0.251081	-0.731428	0.464518	0.933079	NoSig	DGKD
CTTNBP2	48.489	-0.255641	0.932974	-0.274007	0.78408	0.982068	NoSig	CTTNBP2
ACTL6B	3.48216	-1.09866	1.18813	-0.924699	0.355122	0.901202	NoSig	ACTL6B
RARB	349.612	-1.07342	0.594318	-1.80613	0.0708974	0.656836	NoSig	RARB
TOP2B	2480.36	-0.200623	0.360119	-0.557102	0.577458	0.949701	NoSig	TOP2B
TM9SF3	4663.93	0.278938	0.225573	1.23657	0.216245	0.834894	NoSig	TM9SF3
NFKB2	3356.48	-0.031225	0.360266	-0.0866719	0.930932	0.99521	NoSig	NFKB2
UBE2T	195.001	0.35925	0.432906	0.829857	0.40662	0.917372	NoSig	UBE2T
PPP1R12B	884.459	-0.141944	0.474273	-0.299288	0.76472	0.980568	NoSig	PPP1R12B
DNAJC10	3218.01	0.494482	0.376509	1.31334	0.18907	0.811963	NoSig	DNAJC10
GTF3C1	7574.16	-0.27246	0.29898	-0.9113	0.362138	0.903736	NoSig	GTF3C1
IL4R	1127.55	0.0171459	0.282351	0.0607256	0.951578	0.99705	NoSig	IL4R
USP33	1350	0.104947	0.390936	0.268451	0.788352	0.982068	NoSig	USP33
PAK3	80.676	-1.91343	0.898594	-2.12936	0.0332245	0.542318	NoSig	PAK3
CAPN6	13.489	-2.7108	1.26541	-2.14224	0.0321745	0.537959	NoSig	CAPN6
DCX	3.54221	0.652136	1.03359	0.630941	0.528079	0.943248	NoSig	DCX
SNRPA	4914.1	-0.471001	0.423644	-1.11179	0.26623	0.8642	NoSig	SNRPA
SPAG6	7.61477	-1.3707	0.960183	-1.42754	0.153425	0.784237	NoSig	SPAG6
EXOSC5	1199.47	-0.229851	0.326112	-0.704822	0.480921	0.936621	NoSig	EXOSC5
DYNC1I2	1991.69	0.317968	0.258493	1.23009	0.218665	0.836236	NoSig	DYNC1I2
APBB1IP	121.352	0.332876	0.652953	0.509801	0.610191	0.953666	NoSig	APBB1IP
LRCH4	1171.32	-0.872325	0.371228	-2.34984	0.0187815	0.449362	NoSig	LRCH4
FAM76B	357.895	-0.192994	0.497865	-0.387644	0.69828	0.966228	NoSig	FAM76B
SIRT6	966.548	-0.273201	0.290794	-0.939499	0.347474	0.897345	NoSig	SIRT6
TYR	26652.6	-0.62159	0.418856	-1.48402	0.137804	0.773493	NoSig	TYR
POLD3	464.118	0.0850033	0.192232	0.442191	0.658351	0.960361	NoSig	POLD3
ACTN2	22.2167	0.00364055	0.599336	0.0060743	0.995153	0.999566	NoSig	ACTN2
CAPZB	8512.44	-0.417819	0.241715	-1.72856	0.0838872	0.689866	NoSig	CAPZB
GPR137B	9261.05	0.174177	0.328603	0.530051	0.596076	0.952731	NoSig	GPR137B
NAALAD2	24.7264	-1.01461	0.746679	-1.35883	0.174199	0.797211	NoSig	NAALAD2
JADE1	1817.7	-0.0899365	0.322759	-0.278649	0.780514	0.982068	NoSig	JADE1
SLC25A43	1119.89	0.237422	0.248208	0.956544	0.338798	0.895532	NoSig	SLC25A43
UBE2A	1984.84	0.56901	0.218205	2.60769	0.00911556	0.336705	NoSig	UBE2A
FGFR1	2469.85	0.100719	0.595386	0.169167	0.865666	0.989237	NoSig	FGFR1
FKBP6	1.89853	0.594906	0.74215	0.801598	0.422786	NA	NA	FKBP6
SMC1B	3.58496	-0.0427859	0.673855	-0.0634943	0.949373	0.996654	NoSig	SMC1B
FBLN1	1658.27	-1.2627	0.696772	-1.81222	0.0699522	0.655145	NoSig	FBLN1
ITGA8	49.8538	-0.788699	0.936551	-0.842131	0.399714	0.91622	NoSig	ITGA8
CST7	135.874	0.377304	0.990128	0.381066	0.703155	0.967692	NoSig	CST7
MAP2	1995.08	1.61125	0.703078	2.29171	0.0219224	0.480298	NoSig	MAP2
PIAS2	792.189	0.183396	0.273994	0.669341	0.503278	0.941586	NoSig	PIAS2
AMPH	20.999	-0.613899	0.721127	-0.851305	0.3946	0.913737	NoSig	AMPH
ARAF	3237.45	-0.310053	0.389419	-0.796192	0.42592	0.922727	NoSig	ARAF
MCCC1	506.208	0.116919	0.288969	0.404608	0.685765	0.964678	NoSig	MCCC1
LAMP3	15.8993	0.667081	0.859955	0.775716	0.437917	0.926017	NoSig	LAMP3
FAP	125.238	-3.22199	1.04393	-3.0864	0.00202599	0.180313	NoSig	FAP
NEBL	32.3554	0.417832	0.943488	0.442859	0.657868	0.960361	NoSig	NEBL
ACER3	1368.11	-0.511456	0.313771	-1.63003	0.103095	0.73257	NoSig	ACER3
UBE2K	2169.26	0.303923	0.304603	0.997769	0.318391	0.889171	NoSig	UBE2K
PIK3C3	1114	0.267433	0.294097	0.909338	0.363172	0.903736	NoSig	PIK3C3
N4BP2	192.855	0.0209869	0.590516	0.03554	0.971649	0.99798	NoSig	N4BP2
TIGAR	596.879	0.0800026	0.343963	0.232591	0.816079	0.98388	NoSig	TIGAR
TULP3	3484.78	-0.3793	0.327455	-1.15833	0.24673	0.855431	NoSig	TULP3
SYNJ2	629.487	1.22961	0.632736	1.94332	0.0519774	0.602122	NoSig	SYNJ2
ADCY2	169.791	0.933887	0.975354	0.957485	0.338323	0.895397	NoSig	ADCY2
PPP2R5C	3914.52	0.333736	0.168216	1.98397	0.0472593	0.58725	NoSig	PPP2R5C
PMS2P1	320.824	0.183175	0.200592	0.913175	0.361151	0.903682	NoSig	PMS2P1
RBFOX1	8.35648	-2.01496	1.47682	-1.36439	0.172445	0.796102	NoSig	RBFOX1
GNB1	12293	-0.0390876	0.203137	-0.19242	0.847414	0.98718	NoSig	GNB1
HOXA9	0.719627	-0.739648	1.91726	-0.385784	0.699656	NA	NA	HOXA9
EDN1	11.3923	0.19193	0.556498	0.344889	0.730178	0.973386	NoSig	EDN1
MLLT10	805.201	0.157749	0.316672	0.498146	0.618381	0.954627	NoSig	MLLT10
ZCWPW1	319.916	-0.402796	0.379447	-1.06153	0.288447	0.879582	NoSig	ZCWPW1
ADCYAP1R1	6.00112	-0.705852	1.05081	-0.671724	0.50176	0.941586	NoSig	ADCYAP1R1
FGF20	1.9119	-0.231535	0.972589	-0.238061	0.811834	NA	NoSig	FGF20
P2RY10	4.59154	2.0453	1.15778	1.76657	NA	NA	NA	P2RY10
ITM2A	222.57	-0.449613	0.582693	-0.771612	0.440344	0.926227	NoSig	ITM2A
NRDC	4017.48	0.257833	0.301508	0.855147	0.39247	0.913674	NoSig	NRDC
VDAC3	2792.28	0.0598315	0.276102	0.216701	0.828441	0.985436	NoSig	VDAC3
PCM1	2524.95	0.286484	0.438815	0.652859	0.513847	0.943145	NoSig	PCM1
TNRC6C	904.598	0.116302	0.217126	0.535646	0.592204	0.952699	NoSig	TNRC6C
CBFA2T2	1390.09	-0.297002	0.172262	-1.72413	0.084684	0.691109	NoSig	CBFA2T2
BRINP1	14.1398	-0.746903	0.883843	-0.845063	0.398076	0.91538	NoSig	BRINP1
ITCH	1020.48	0.268389	0.390562	0.687187	0.491965	0.939718	NoSig	ITCH
PKD2L2	6.51414	-0.163177	0.583775	-0.279521	0.779845	0.982068	NoSig	PKD2L2
TP53INP2	2631.37	-0.102359	0.367013	-0.278896	0.780324	0.982068	NoSig	TP53INP2
SDF4	6742.19	-0.0189483	0.291043	-0.0651046	0.948091	0.996459	NoSig	SDF4
MYH7B	74.1282	-0.416417	0.402654	-1.03418	0.301052	0.88423	NoSig	MYH7B
BPIFB2	0.276452	-0.320319	2.10399	-0.152243	0.878995	NA	NoSig	BPIFB2
TP73	30.7269	-0.623133	0.537297	-1.15976	0.246148	0.855117	NoSig	TP73
TOLLIP	7285.93	-0.0823061	0.289578	-0.284228	0.776236	0.982038	NoSig	TOLLIP
UBE2D4	994.119	0.077321	0.26603	0.290648	0.771321	0.980807	NoSig	UBE2D4
CLUL1	93.7405	-1.84899	0.696567	-2.65444	0.00794404	0.319881	NoSig	CLUL1
RUNX1T1	95.9502	1.48259	0.811394	1.82721	0.0676682	0.650401	NoSig	RUNX1T1
CDH17	5.44857	0.508611	1.05837	0.480559	0.63083	0.955528	NoSig	CDH17
THOC1	486.596	0.188459	0.443166	0.425256	0.67065	0.962553	NoSig	THOC1
FKBP7	608.634	0.30322	0.313451	0.96736	0.333364	0.894538	NoSig	FKBP7
OSBPL6	64.1728	0.254534	0.616023	0.413189	0.679468	0.9644	NoSig	OSBPL6
SLC1A3	256.353	-0.185181	0.824368	-0.224634	0.822264	0.984564	NoSig	SLC1A3
XRCC5	13836.7	0.206979	0.214213	0.96623	0.333929	0.894562	NoSig	XRCC5
LXN	264.008	0.48409	0.280031	1.7287	0.0838629	0.689866	NoSig	LXN
SP140	33.0963	0.781797	0.8313	0.940452	0.346986	0.897218	NoSig	SP140
MKNK1	935.419	-0.156005	0.261371	-0.59687	0.550594	0.945772	NoSig	MKNK1
TNS1	16513.3	-0.417211	0.426275	-0.978738	0.327709	0.89234	NoSig	TNS1
REXO1	2291.08	-0.414922	0.321742	-1.28961	0.197186	0.819556	NoSig	REXO1
SAR1A	3618.6	0.339748	0.206987	1.6414	0.100715	0.728702	NoSig	SAR1A
CDC14A	102.946	-0.0428307	0.493008	-0.0868763	0.93077	0.995162	NoSig	CDC14A
RAPGEF3	876.01	-2.99116	0.825364	-3.62405	0.000290023	0.0701932	NoSig	RAPGEF3
CEACAM1	656.585	-0.868025	0.660892	-1.31341	0.189044	0.811963	NoSig	CEACAM1
SENP1	453.837	0.139315	0.235414	0.591787	0.553993	0.946324	NoSig	SENP1
DUSP13	0.197396	-0.276302	2.65018	-0.104258	0.916965	NA	NoSig	DUSP13
CIC	9751.46	-0.129945	0.357777	-0.363202	0.716454	0.971284	NoSig	CIC
LIPE	461.431	-1.25198	0.457714	-2.7353	0.0062324	0.293099	NoSig	LIPE
FDFT1	13193.2	-1.22282	0.502373	-2.43409	0.0149293	0.416082	NoSig	FDFT1
PAFAH1B3	2215.58	-0.324162	0.442417	-0.732707	0.463737	0.933079	NoSig	PAFAH1B3
OPHN1	164.913	-0.380005	0.351079	-1.08239	0.279079	0.874075	NoSig	OPHN1
AFM	0.0325845	-0.248944	5.65541	-0.0440186	0.96489	NA	NoSig	AFM
KIF22	1672.53	-0.216487	0.302155	-0.716478	0.473696	0.936056	NoSig	KIF22
SCGN	1.06081	0.952491	1.35507	0.702911	0.482111	NA	NA	SCGN
CARMIL1	644.473	-0.313108	0.478839	-0.653888	0.513184	0.943145	NoSig	CARMIL1
PGM1	965.453	0.0081403	0.599727	0.0135733	0.98917	0.998424	NoSig	PGM1
DDX1	3573.36	0.178959	0.319435	0.560236	0.575319	0.949525	NoSig	DDX1
DNM2	8050.63	-0.0718708	0.282278	-0.25461	0.799025	0.983058	NoSig	DNM2
EPB41L2	1222.4	-0.0909474	0.330119	-0.275499	0.782933	0.982068	NoSig	EPB41L2
RIMS1	1.77059	-0.589797	1.0485	-0.562516	0.573765	NA	NA	RIMS1
MOXD1	78.5344	-0.459362	0.870207	-0.527877	0.597585	0.952731	NoSig	MOXD1
STX7	7448.09	0.253705	0.325495	0.779445	0.435718	0.925256	NoSig	STX7
RABL2B	451.109	-0.633478	0.22605	-2.80239	0.00507263	0.276681	NoSig	RABL2B
KEAP1	2809.53	-0.116397	0.224016	-0.519592	0.603348	0.952731	NoSig	KEAP1
DDX43	65.7115	-6.65019	1.88951	-3.51953	0.000432312	0.0824022	NoSig	DDX43
PTPRH	335.363	-0.0331642	0.489336	-0.0677739	0.945966	0.995992	NoSig	PTPRH
DCT	1094.31	-3.47265	1.07863	-3.2195	0.00128413	0.149856	NoSig	DCT
SLC35C2	4746.89	-0.475355	0.35996	-1.32058	0.186643	0.809817	NoSig	SLC35C2
CRYBG3	140.323	0.562117	0.478628	1.17443	0.240221	0.851292	NoSig	CRYBG3
EPHA6	0.547919	-0.376648	1.42859	-0.26365	0.792049	NA	NoSig	EPHA6
SCTR	0.774777	0.112353	1.10513	0.101665	0.919023	NA	NoSig	SCTR
RFX3	198.975	0.049573	0.407353	0.121695	0.90314	0.99174	NoSig	RFX3
RIF1	1003.49	0.264103	0.395341	0.668039	0.504109	0.941586	NoSig	RIF1
RAB21	1414.98	0.123638	0.237105	0.52145	0.602053	0.952731	NoSig	RAB21
SLC4A4	76.9533	-0.793353	0.805137	-0.985364	0.324445	0.891121	NoSig	SLC4A4
SMARCA2	4282.06	0.277422	0.228425	1.2145	0.224558	0.840503	NoSig	SMARCA2
RDH8	13.7563	-2.96009	1.2922	-2.29074	0.0219782	0.48106	NoSig	RDH8
SESN1	1210.25	-0.471107	0.413562	-1.13914	0.254643	0.859975	NoSig	SESN1
MID2	76.8002	0.0589093	0.843313	0.0698546	0.944309	0.99592	NoSig	MID2
PIH1D3	0.0847904	-0.588399	3.24932	-0.181084	0.856302	NA	NA	PIH1D3
COL5A3	309.774	0.229337	0.653767	0.350793	0.725744	0.972986	NoSig	COL5A3
SRCAP	7480.48	-0.355595	0.298972	-1.18939	0.234284	0.846906	NoSig	SRCAP
PUM3	1724.44	0.817599	0.43484	1.88023	0.0600764	0.627523	NoSig	PUM3
CPB2	14.0762	2.60598	0.988817	2.63545	0.00840253	0.330225	NoSig	CPB2
CHRNA3	92.1372	-0.465422	1.02031	-0.456156	0.648278	0.958442	NoSig	CHRNA3
KCNN2	94.8027	-1.18825	0.772075	-1.53903	0.123797	0.757811	NoSig	KCNN2
CNOT4	755.873	0.284844	0.158569	1.79634	0.0724403	0.662847	NoSig	CNOT4
PSEN1	3472.65	0.206301	0.187151	1.10232	0.270321	0.867691	NoSig	PSEN1
CPOX	428.746	0.127035	0.324857	0.391049	0.695761	0.96552	NoSig	CPOX
CLDND1	1064.9	-0.0319456	0.253206	-0.126165	0.899602	0.991203	NoSig	CLDND1
MOK	1674.14	0.0631091	0.568715	0.110968	0.911642	0.992842	NoSig	MOK
HSP90AA1	36982.6	0.413184	0.370923	1.11393	0.265308	0.862865	NoSig	HSP90AA1
RBL1	208.943	0.128548	0.378965	0.33921	0.734452	0.974882	NoSig	RBL1
DLGAP4	6936.32	-0.246836	0.356912	-0.691587	0.489197	0.939718	NoSig	DLGAP4
IGSF9B	27.769	-0.476892	0.518283	-0.920138	0.357501	0.90275	NoSig	IGSF9B
CFHR2	0	NA	NA	NA	NA	NA	NA	CFHR2
CROCCP3	77.2495	-0.282088	0.565168	-0.499122	0.617694	0.954627	NoSig	CROCCP3
NDC80	87.2183	0.555709	0.61088	0.909685	0.362989	0.903736	NoSig	NDC80
AP4E1	224.303	0.222354	0.363264	0.612101	0.540471	0.944445	NoSig	AP4E1
RSBN1	436.775	-0.0538415	0.316132	-0.170313	0.864764	0.989237	NoSig	RSBN1
MAGI3	151.015	0.156841	0.443187	0.353893	0.723419	0.97196	NoSig	MAGI3
CXCL2	5.78681	0.322684	0.849459	0.37987	0.704042	0.967995	NoSig	CXCL2
AFP	0.179639	-0.646731	3.32566	-0.194467	0.84581	NA	NA	AFP
COL4A4	41.9221	1.52075	0.595739	2.55271	0.0106888	0.357644	NoSig	COL4A4
TCF7	936.399	-0.525329	0.343642	-1.52871	0.126337	0.758431	NoSig	TCF7
OSTM1	5898.32	-0.0211642	0.489882	-0.0432026	0.96554	0.99798	NoSig	OSTM1
CDH7	14.6487	-0.838579	1.12289	-0.746802	0.455183	0.929712	NoSig	CDH7
IMPG2	21.7555	0.219025	1.11552	0.196343	NA	NA	NoSig	IMPG2
PCNP	2184.08	-0.202768	0.416934	-0.48633	0.626733	0.955528	NoSig	PCNP
EXD2	996.234	-0.0342843	0.177551	-0.193096	0.846884	0.98718	NoSig	EXD2
ARG2	88.7961	0.410349	0.439798	0.93304	0.350799	0.899093	NoSig	ARG2
MEF2C	2394.37	0.168485	0.304243	0.553783	0.579727	0.949701	NoSig	MEF2C
PTPRC	216.666	0.739958	0.95471	0.775061	0.438304	0.926017	NoSig	PTPRC
CACNA1S	2.03048	-0.722434	1.30519	-0.553508	0.579916	0.949701	NoSig	CACNA1S
PKP1	86.1611	-0.935373	0.622729	-1.50205	0.133083	0.770197	NoSig	PKP1
UBA5	514.213	0.0321144	0.330178	0.0972637	0.922517	0.993572	NoSig	UBA5
STK17B	133.361	0.674634	0.652743	1.03354	0.301353	0.88423	NoSig	STK17B
CDC14B	940.352	0.131266	0.298825	0.439275	0.660463	0.9605	NoSig	CDC14B
ZNF510	270.325	0.225509	0.393344	0.573313	0.566433	0.948599	NoSig	ZNF510
LRP2	332.862	-0.550117	1.09984	-0.500179	0.616949	0.954299	NoSig	LRP2
ZNF506	422.754	-0.0939224	0.242925	-0.386631	0.699029	0.966652	NoSig	ZNF506
JMJD4	1086.11	-0.0456415	0.312508	-0.146049	0.883883	0.990625	NoSig	JMJD4
DUSP12	383.714	-0.143366	0.245756	-0.583369	0.559645	0.947012	NoSig	DUSP12
AACS	1065.43	0.065782	0.275975	0.238362	0.8116	0.983492	NoSig	AACS
DELE1	4316.45	-0.334383	0.293854	-1.13792	0.255154	0.860186	NoSig	DELE1
SLC13A1	0.0286519	-0.192369	5.65541	-0.0340151	0.972865	NA	NoSig	SLC13A1
CADPS2	625.748	-0.582242	0.585158	-0.995016	0.319728	0.890002	NoSig	CADPS2
PCDHB4	25.6744	-1.27986	0.851113	-1.50375	0.132646	0.769613	NoSig	PCDHB4
PCDHA6	1.76451	-2.78324	1.61807	-1.72011	0.0854131	NA	NA	PCDHA6
PCDHGA2	110.246	1.23056	0.847852	1.45138	0.146673	0.777847	NoSig	PCDHGA2
HSPB11	479.066	0.0329688	0.243631	0.135323	0.892357	0.991023	NoSig	HSPB11
PHLPP1	5721.61	0.28784	0.308975	0.931597	0.351545	0.899227	NoSig	PHLPP1
ATP8B1	311.153	0.946643	0.628175	1.50697	0.131817	0.767857	NoSig	ATP8B1
IL12RB2	560.523	-2.86215	0.860966	-3.32435	0.000886234	0.119768	NoSig	IL12RB2
SMARCD3	1452.16	0.320554	0.324577	0.987607	0.323345	0.890784	NoSig	SMARCD3
WDR70	661.3	0.15511	0.213472	0.726604	0.467469	0.934111	NoSig	WDR70
FYB1	190.545	0.207148	0.766128	0.270383	0.786865	0.982068	NoSig	FYB1
MPP4	70.1746	-2.2101	0.877052	-2.51992	0.0117381	0.367911	NoSig	MPP4
STRADB	3080.77	0.418513	0.347298	1.20505	0.228183	0.843258	NoSig	STRADB
BZW1	1650.74	0.299502	0.282177	1.0614	0.288508	0.879582	NoSig	BZW1
PGR	7.8986	3.40496	0.832011	4.09244	4.26855e-05	0.0339929	Up	PGR
C1QTNF3	86.6346	0.482077	0.644845	0.747586	0.45471	0.929712	NoSig	C1QTNF3
ME2	869.621	0.593805	0.369439	1.60731	0.107986	0.737976	NoSig	ME2
C5orf22	2821.83	0.549685	0.381937	1.4392	0.150093	0.781435	NoSig	C5orf22
CCNT2	816.588	0.178677	0.502651	0.35547	0.722238	0.971921	NoSig	CCNT2
FAM135A	179.028	-0.0273277	0.48706	-0.0561075	0.955256	0.997573	NoSig	FAM135A
COL19A1	8.39038	-0.428928	1.11375	-0.385121	0.700148	0.966652	NoSig	COL19A1
EPB41L3	1522.46	-0.833575	0.630134	-1.32285	0.185884	0.808515	NoSig	EPB41L3
COBLL1	437.966	-2.11726	0.752743	-2.81272	0.00491247	0.270103	NoSig	COBLL1
DLG3	250.104	-0.570763	0.494017	-1.15535	0.247947	0.856567	NoSig	DLG3
KCNK2	437.435	-4.22475	0.961449	-4.39415	1.11209e-05	0.0195668	Down	KCNK2
SERTAD4	32.9886	0.55637	0.578397	0.961918	0.336091	0.894562	NoSig	SERTAD4
TRAF5	605.088	0.698571	0.551101	1.26759	0.204944	0.828896	NoSig	TRAF5
MRPL22	809.62	0.32053	0.275835	1.16203	0.245222	0.854503	NoSig	MRPL22
GEMIN5	1106.95	0.00360941	0.195642	0.018449	0.985281	0.998035	NoSig	GEMIN5
OPRK1	6.89151	0.400419	1.465	0.273324	0.784605	0.982068	NoSig	OPRK1
NFE2L1	19475.7	-0.643706	0.345497	-1.86313	0.0624437	0.632382	NoSig	NFE2L1
SEMA5B	41.6701	0.0555574	0.67537	0.0822622	0.934438	0.995539	NoSig	SEMA5B
GSK3B	1891.02	0.0779748	0.201779	0.386437	0.699173	0.966652	NoSig	GSK3B
ITGB5	7403.72	-0.0505276	0.262072	-0.192801	0.847115	0.98718	NoSig	ITGB5
ERC1	3158.46	-0.132993	0.299666	-0.443804	0.657184	0.960361	NoSig	ERC1
XPO1	3457.17	0.406457	0.436135	0.931951	0.351362	0.899164	NoSig	XPO1
LINC01587	3.92856	-0.368414	0.97589	-0.377516	0.70579	0.968517	NoSig	LINC01587
RNF13	1187.68	-0.0801432	0.366419	-0.21872	0.826868	0.985154	NoSig	RNF13
TRPM3	56.9547	-0.145075	0.900432	-0.161117	0.872001	0.989546	NoSig	TRPM3
PALB2	556.498	0.0530707	0.250255	0.212067	0.832055	0.985888	NoSig	PALB2
DOP1A	368.614	-0.290006	0.449252	-0.645531	0.518583	0.943248	NoSig	DOP1A
LYRM2	1155.25	0.245274	0.399795	0.6135	0.539546	0.943967	NoSig	LYRM2
BCKDHB	495.971	-0.0562178	0.359705	-0.156288	0.875806	0.989927	NoSig	BCKDHB
KAT6A	1699.63	-0.240479	0.350499	-0.686106	0.492646	0.939729	NoSig	KAT6A
TUT7	737.843	0.088692	0.357775	0.247899	0.804213	0.983492	NoSig	TUT7
ULK2	1143.5	0.227922	0.303784	0.750275	0.453089	0.929424	NoSig	ULK2
GRHL2	0.93249	1.02614	1.13627	0.903082	0.366482	NA	NA	GRHL2
TNPO1	3664.46	0.329371	0.343192	0.959728	0.337192	0.894562	NoSig	TNPO1
PLOD1	12229.3	-0.499363	0.393648	-1.26855	0.204601	0.828747	NoSig	PLOD1
P2RX5	7.89191	0.517643	0.93907	0.551229	0.581476	0.950484	NoSig	P2RX5
ITGAE	381.791	0.0101448	0.28198	0.0359771	0.971301	0.99798	NoSig	ITGAE
DIS3	1056.21	0.349491	0.334627	1.04442	0.296291	0.882263	NoSig	DIS3
PIBF1	211.162	0.187421	0.554268	0.338141	0.735257	0.97492	NoSig	PIBF1
TDRD3	3702	-0.48395	0.792009	-0.611042	0.541172	0.94482	NoSig	TDRD3
AC000061.1	0	NA	NA	NA	NA	NA	NA	AC000061.1
NUFIP1	357.202	0.0381907	0.210257	0.181638	0.855867	0.988624	NoSig	NUFIP1
PDS5B	770.713	0.476221	0.41654	1.14328	0.252923	0.858565	NoSig	PDS5B
OXCT1	1919.84	1.03485	0.423143	2.44563	0.0144601	0.408833	NoSig	OXCT1
RRAGB	512.111	0.0469613	0.283593	0.165594	0.868476	0.989237	NoSig	RRAGB
EPYC	0.809953	-1.75591	2.38569	-0.736019	0.461719	NA	NA	EPYC
CYLD	741.519	0.221538	0.389727	0.568445	0.569733	0.949513	NoSig	CYLD
SLC27A5	496.786	-0.453783	0.470126	-0.965237	0.334426	0.894562	NoSig	SLC27A5
ZNF324	515.842	-0.481963	0.28049	-1.71829	0.0857433	0.695046	NoSig	ZNF324
ZNF671	378.078	-0.475315	0.419504	-1.13304	0.257197	0.861068	NoSig	ZNF671
ZNF416	346.226	-0.338323	0.258675	-1.30791	0.190904	0.814381	NoSig	ZNF416
ZNF586	180.828	-0.131442	0.260845	-0.503908	0.614326	0.953876	NoSig	ZNF586
ZNF446	615.11	-0.411665	0.299504	-1.37449	0.169291	0.794241	NoSig	ZNF446
ZNF264	832.665	-0.0922656	0.190491	-0.484358	0.628132	0.955528	NoSig	ZNF264
RPS5	55912	-0.270065	0.429772	-0.628392	0.529747	0.943248	NoSig	RPS5
FAT1	6087.83	0.24498	0.37456	0.654049	0.51308	0.943145	NoSig	FAT1
YTHDC1	2216.68	0.07454	0.201371	0.370162	0.711262	0.970033	NoSig	YTHDC1
CHMP2B	468.881	0.0650006	0.309379	0.2101	0.833589	0.985978	NoSig	CHMP2B
SMAP2	1818.89	0.288947	0.38496	0.750588	0.452901	0.929424	NoSig	SMAP2
PPIE	1792.31	-0.383684	0.25644	-1.49619	0.134603	0.772635	NoSig	PPIE
ZMPSTE24	1957.47	0.107506	0.30848	0.348502	0.727464	0.973133	NoSig	ZMPSTE24
STARD7	7991.56	0.332731	0.166049	2.00381	0.0450908	0.578888	NoSig	STARD7
NOA1	2310.78	0.214963	0.325341	0.660731	0.508785	0.942442	NoSig	NOA1
REST	637.154	0.142257	0.342667	0.415146	0.678035	0.964352	NoSig	REST
HAL	1.77694	-0.336191	1.00641	-0.334049	0.738342	NA	NoSig	HAL
SSH1	2847.09	-0.140971	0.185088	-0.761644	0.446273	0.928675	NoSig	SSH1
GSTP1	45862.3	-1.1631	0.723228	-1.6082	0.107791	0.737976	NoSig	GSTP1
APLP2	21789.9	0.239936	0.343143	0.699232	0.484407	0.938057	NoSig	APLP2
FAM234B	512.464	-0.543971	0.329986	-1.64847	0.0992572	0.725338	NoSig	FAM234B
SLCO1A2	12.4939	1.24001	0.94655	1.31003	NA	NA	NA	SLCO1A2
WBP11	4838.67	0.163788	0.185106	0.88483	0.376248	0.909333	NoSig	WBP11
EIF3I	9522	-0.13849	0.274662	-0.504218	0.614108	0.953876	NoSig	EIF3I
NKAIN1	336.353	0.204502	0.723362	0.282711	0.777399	0.982068	NoSig	NKAIN1
COL16A1	1078.16	-0.638632	0.516461	-1.23655	0.216253	0.834894	NoSig	COL16A1
TXLNA	4756.11	-0.408682	0.269711	-1.51526	0.129707	0.764574	NoSig	TXLNA
APOB	14.1559	-0.582882	1.14861	-0.507467	0.611828	0.953876	NoSig	APOB
NCOA1	1423.63	-0.228637	0.258776	-0.88353	0.37695	0.909491	NoSig	NCOA1
AGBL5	2148.28	-0.387799	0.34132	-1.13618	0.255883	0.860908	NoSig	AGBL5
EFR3B	1688.41	-0.21252	0.313538	-0.677813	0.49789	0.940996	NoSig	EFR3B
KIF3C	1146.27	-0.44232	0.417764	-1.05878	0.2897	0.879582	NoSig	KIF3C
RAB10	3451.83	0.278789	0.258979	1.07649	0.281708	0.875485	NoSig	RAB10
GCKR	0.198642	-0.821026	2.70236	-0.303819	0.761266	NA	NA	GCKR
HADHA	14156.3	-0.0118106	0.224485	-0.0526121	0.958041	0.99798	NoSig	HADHA
MAPRE3	783.147	-1.1019	0.419162	-2.62881	0.00856841	0.331616	NoSig	MAPRE3
CAD	6021.75	-0.294479	0.380264	-0.774407	0.43869	0.926017	NoSig	CAD
CD59	26224.5	-0.302129	0.278591	-1.08449	0.278147	0.873299	NoSig	CD59
CD82	4734.26	-2.66181	0.793545	-3.35433	0.000795577	0.113733	NoSig	CD82
BCORL1	1140.81	-0.466259	0.329164	-1.41649	0.156631	0.786605	NoSig	BCORL1
ATRX	1314.7	0.298915	0.338095	0.884117	0.376633	0.909491	NoSig	ATRX
AK6	449.434	0.171912	0.253343	0.678572	0.497409	0.940931	NoSig	AK6
FCN1	66.2799	-1.09285	0.849518	-1.28644	0.198291	0.820853	NoSig	FCN1
MYNN	228.102	0.035491	0.378495	0.0937688	0.925293	0.993664	NoSig	MYNN
MECOM	35.5898	0.510194	0.482208	1.05804	0.290039	0.879582	NoSig	MECOM
SCAMP1	879.988	0.182377	0.327059	0.557628	0.577099	0.94957	NoSig	SCAMP1
PREP	2041.43	-0.304172	0.293095	-1.03779	0.299367	0.883309	NoSig	PREP
HACE1	215.117	-0.340977	0.492085	-0.692922	0.488359	0.939635	NoSig	HACE1
SEH1L	1333.37	0.216462	0.24895	0.869499	0.384574	0.91154	NoSig	SEH1L
WDR47	311.217	-0.0444518	0.306353	-0.1451	0.884632	0.990625	NoSig	WDR47
WDFY1	6932.33	0.00274437	0.379719	0.00722737	0.994233	0.999566	NoSig	WDFY1
OVGP1	26.2396	-0.70342	0.5668	-1.24104	0.214592	0.834112	NoSig	OVGP1
SLC25A24	555.508	0.195753	0.452283	0.432811	0.665152	0.961212	NoSig	SLC25A24
MAP3K4	498.233	-0.222767	0.336917	-0.661192	0.508489	0.942442	NoSig	MAP3K4
PILRA	137.285	-0.114859	0.528966	-0.217139	0.8281	0.985436	NoSig	PILRA
IGSF9	14.3678	-1.07744	0.899514	-1.1978	0.230996	0.843961	NoSig	IGSF9
ABCB1	40.3423	0.218402	0.447796	0.487725	0.625744	0.955171	NoSig	ABCB1
ZNF213	1991.89	-0.682056	0.418116	-1.63126	0.102836	0.73257	NoSig	ZNF213
AKR1B1	5788.93	-0.73685	0.304662	-2.41859	0.0155809	0.42087	NoSig	AKR1B1
CPNE3	3319.2	0.532768	0.406106	1.31189	0.189556	0.812387	NoSig	CPNE3
RRN3	1448.83	0.28101	0.233995	1.20092	0.229781	0.843258	NoSig	RRN3
CTTN	9152.49	0.0228717	0.199968	0.114377	0.908939	0.992401	NoSig	CTTN
WNT11	159.672	-0.334382	0.599384	-0.557875	0.57693	0.949525	NoSig	WNT11
MTIF2	1390.44	0.0565958	0.281034	0.201384	0.840398	0.98646	NoSig	MTIF2
DDHD2	1686.4	-0.225501	0.375154	-0.601087	0.547782	0.945449	NoSig	DDHD2
TTC39A	98.3584	2.41996	0.678024	3.56914	0.00035816	0.0760152	NoSig	TTC39A
EPS15	3008.61	0.510172	0.358411	1.42343	0.154612	0.785451	NoSig	EPS15
ORC1	77.9053	-0.311498	0.339056	-0.918721	0.358242	0.90275	NoSig	ORC1
MGST2	3281.44	0.869801	0.443319	1.96202	0.0497602	0.596035	NoSig	MGST2
CHERP	3036.65	-0.230502	0.247151	-0.932634	0.351009	0.899093	NoSig	CHERP
ATG16L1	964.145	-0.0645597	0.194705	-0.331576	0.740209	0.975727	NoSig	ATG16L1
USP40	1693.79	0.103214	0.208096	0.495991	0.619901	0.954849	NoSig	USP40
POMGNT1	6326.32	-0.693893	0.35339	-1.96353	0.0495844	0.595394	NoSig	POMGNT1
RAD54L	50.7849	-0.335437	0.464479	-0.722179	0.470184	0.935731	NoSig	RAD54L
MAST2	1643.65	-0.100058	0.308506	-0.324332	0.745687	0.976855	NoSig	MAST2
DNAJA1	5158.22	0.452806	0.269361	1.68104	0.0927552	0.709324	NoSig	DNAJA1
B4GALT1	1844.78	0.253866	0.297404	0.853604	0.393324	0.913674	NoSig	B4GALT1
CHMP5	1543.04	0.270543	0.26267	1.02997	0.303023	0.88423	NoSig	CHMP5
NFX1	2108.38	0.114927	0.173006	0.664292	0.506503	0.942251	NoSig	NFX1
AQP6	5.52235	0.428904	1.10844	0.386943	0.698798	0.966652	NoSig	AQP6
DIMT1	1048.59	0.209207	0.237375	0.881337	0.378135	0.90988	NoSig	DIMT1
IPO11	511.55	0.256427	0.322599	0.794878	0.426684	0.922727	NoSig	IPO11
FOLH1	43.7222	0.820616	0.46764	1.7548	0.0792933	0.679461	NoSig	FOLH1
EIF2AK1	6782.71	0.147208	0.262645	0.560485	0.575149	0.949525	NoSig	EIF2AK1
NME8	2.31988	0.465662	1.10225	0.422464	0.672686	0.962834	NoSig	NME8
EPDR1	506.747	0.386854	0.62018	0.623777	0.532774	0.943248	NoSig	EPDR1
SNX10	277.321	-0.479644	0.762687	-0.628887	0.529423	0.943248	NoSig	SNX10
SEPHS1	1841.95	-0.228049	0.189464	-1.20365	0.228725	0.843258	NoSig	SEPHS1
MRPL28	4693.88	-0.0387594	0.3803	-0.101918	0.918822	0.993572	NoSig	MRPL28
HBQ1	15.2137	-0.983829	0.848796	-1.15909	0.24642	0.855422	NoSig	HBQ1
ITPKC	1375.84	-0.379695	0.298741	-1.27098	0.203735	0.828127	NoSig	ITPKC
CEACAM6	3.39473	2.39789	2.38376	1.00593	NA	NA	NA	CEACAM6
FAT2	47.8799	0.0639832	0.666867	0.095946	0.923563	0.993572	NoSig	FAT2
RBM22	1658.66	0.023624	0.174412	0.135449	0.892257	0.991023	NoSig	RBM22
TMED2	6341.59	0.342035	0.2086	1.63967	0.101074	0.729295	NoSig	TMED2
ERO1B	456.198	0.0793447	0.426855	0.185882	0.852537	0.98815	NoSig	ERO1B
ZFAND6	1526.67	0.163928	0.254473	0.644184	0.519456	0.943248	NoSig	ZFAND6
HSD17B2	104.7	-0.413143	1.62692	-0.253942	0.79954	0.983058	NoSig	HSD17B2
TXLNG	587.574	0.195076	0.332132	0.587345	0.556972	0.94648	NoSig	TXLNG
PPEF1	25.2751	1.07397	0.710832	1.51087	0.130821	0.766008	NoSig	PPEF1
LAT2	117.95	-0.0862651	0.497557	-0.173377	0.862355	0.989237	NoSig	LAT2
HUWE1	13691.3	-0.348172	0.276197	-1.2606	0.207455	0.830055	NoSig	HUWE1
ZW10	525.521	-0.000585471	0.193796	-0.00302107	0.99759	0.999566	NoSig	ZW10
ALG9	447.416	-0.633061	0.268666	-2.35631	0.0184575	0.445779	NoSig	ALG9
MYBPC2	15.9855	3.12616	0.79203	3.94703	7.91266e-05	0.0411333	Up	MYBPC2
NOX4	74.5371	1.63816	0.638447	2.56585	0.0102924	0.354622	NoSig	NOX4
ACOX3	978.369	0.0721368	0.303925	0.237351	0.812385	0.983492	NoSig	ACOX3
MTMR2	1937.63	0.230661	0.217373	1.06113	0.288632	0.879582	NoSig	MTMR2
PPP1R15A	3912.95	-0.262245	0.342621	-0.765407	0.444029	0.927765	NoSig	PPP1R15A
HSD17B14	7060.66	0.074083	0.402511	0.184052	0.853973	0.988567	NoSig	HSD17B14
TRIP6	10761.1	-0.196455	0.350315	-0.560795	0.574937	0.949525	NoSig	TRIP6
ACHE	117.554	-0.0454772	0.564563	-0.080553	0.935797	0.995665	NoSig	ACHE
FTL	124549	-0.211593	0.394219	-0.536739	0.591448	0.952213	NoSig	FTL
SRRT	4814.22	0.0939471	0.210572	0.446152	0.655488	0.960361	NoSig	SRRT
BAX	4250.52	0.137889	0.373537	0.369146	0.712019	0.970124	NoSig	BAX
NLK	947.571	-0.033415	0.283064	-0.118047	0.90603	0.991893	NoSig	NLK
PIGS	2569.52	-0.296781	0.347631	-0.853722	0.393259	0.913674	NoSig	PIGS
ADAMTS2	773.461	0.274944	0.886324	0.310208	0.756403	0.979889	NoSig	ADAMTS2
TMPRSS11E	0.0743122	-0.305518	5.65541	-0.0540222	0.956917	NA	NoSig	TMPRSS11E
ATXN7L3	3414.19	-0.116967	0.247365	-0.47285	0.63632	0.956742	NoSig	ATXN7L3
PGS1	1172.24	-0.427915	0.26066	-1.64166	0.10066	0.728702	NoSig	PGS1
PSMC5	7462.44	0.00104834	0.276759	0.00378792	0.996978	0.999566	NoSig	PSMC5
UIMC1	500.797	0.133597	0.219008	0.61001	0.541855	0.944835	NoSig	UIMC1
CETP	252.456	-1.23238	0.802966	-1.53479	0.124837	0.758431	NoSig	CETP
MMP2	4351.21	-0.148935	0.824394	-0.18066	0.856635	0.988624	NoSig	MMP2
MT3	17.2863	-0.559139	1.18213	-0.472993	0.636218	0.956742	NoSig	MT3
LPCAT2	211.89	-0.569111	0.548253	-1.03805	0.299249	0.883189	NoSig	LPCAT2
GNAO1	1143.92	-1.8243	0.656716	-2.77791	0.00547093	0.28395	NoSig	GNAO1
OGFOD1	1430.59	0.00894692	0.221472	0.0403975	0.967776	0.99798	NoSig	OGFOD1
SH3BP2	3276.17	0.0192321	0.24689	0.0778975	0.93791	0.995792	NoSig	SH3BP2
NOP14	2679.84	0.122115	0.251501	0.485544	0.62729	0.955528	NoSig	NOP14
ADD1	12270.7	-0.42767	0.272435	-1.56981	0.11646	0.749306	NoSig	ADD1
L2HGDH	156.831	0.293008	0.412087	0.711034	0.477063	0.93623	NoSig	L2HGDH
TXNDC16	283.269	-0.283861	0.473527	-0.599461	0.548866	0.94556	NoSig	TXNDC16
RTRAF	5539.63	0.202475	0.205505	0.985254	0.324499	0.891121	NoSig	RTRAF
NID2	122.593	-0.266844	0.543581	-0.490901	0.623497	0.955171	NoSig	NID2
GMCL1	615.395	0.757432	0.411027	1.84278	0.065361	0.640687	NoSig	GMCL1
SF3B2	14845.8	-0.184604	0.272919	-0.676405	0.498784	0.940996	NoSig	SF3B2
KLHL42	660.976	0.112845	0.328924	0.343072	0.731544	0.974044	NoSig	KLHL42
GNAS	130216	0.181986	0.261753	0.695261	0.486892	0.938755	NoSig	GNAS
DNM1L	1835.5	0.157099	0.374995	0.418938	0.675262	0.963606	NoSig	DNM1L
PTHLH	22.9464	-1.07283	1.09432	-0.980363	0.326907	0.892072	NoSig	PTHLH
PHACTR3	132.529	-0.413456	0.973681	-0.424632	0.671105	0.962573	NoSig	PHACTR3
ERGIC2	763.384	0.264309	0.359337	0.735546	0.462007	0.933029	NoSig	ERGIC2
TFAP2C	1847.86	0.528263	0.392213	1.34688	0.17802	0.799969	NoSig	TFAP2C
AURKA	303.65	0.315902	0.427112	0.739624	0.459528	0.9316	NoSig	AURKA
CASS4	10.9481	0.384087	0.678034	0.566473	0.571073	0.949525	NoSig	CASS4
PIR	9078.29	0.527072	0.45582	1.15632	0.247552	0.856438	NoSig	PIR
AAMDC	1185.33	-0.507807	0.380505	-1.33456	0.182021	0.803349	NoSig	AAMDC
RFX2	261.937	-0.309694	0.321705	-0.962665	0.335716	0.894562	NoSig	RFX2
METTL2A	506.624	0.364014	0.261816	1.39034	0.164425	0.789652	NoSig	METTL2A
SULT2B1	35.265	0.238737	0.771779	0.309334	0.757068	0.979952	NoSig	SULT2B1
ALG6	570.767	-0.0285854	0.271659	-0.105225	0.916197	0.993508	NoSig	ALG6
CNOT3	2639.2	-0.164018	0.2946	-0.556749	0.577699	0.949701	NoSig	CNOT3
GP6	6.81121	-1.54896	0.709394	-2.1835	0.0289993	0.525132	NoSig	GP6
PTPN4	436.95	-0.366847	0.349316	-1.05019	0.293632	0.88156	NoSig	PTPN4
DDX18	1784.27	0.317774	0.247776	1.28251	0.199666	0.822908	NoSig	DDX18
KHSRP	16035.6	-0.305399	0.332803	-0.917657	0.358799	0.90275	NoSig	KHSRP
GNA11	5311.21	-0.394745	0.318788	-1.23827	0.215616	0.834894	NoSig	GNA11
ASAP3	734.739	-0.673952	0.450542	-1.49587	0.134688	0.772635	NoSig	ASAP3
EDEM2	1026.18	-0.17085	0.256533	-0.665996	0.505413	0.941907	NoSig	EDEM2
DNMT3B	113.467	-0.126082	0.344088	-0.366423	0.714049	0.97024	NoSig	DNMT3B
REM1	34.6017	0.59373	0.583189	1.01808	0.308642	0.885314	NoSig	REM1
TPX2	811.098	0.0542524	0.514737	0.105398	0.91606	0.993508	NoSig	TPX2
FER1L4	40.9617	0.880901	0.711659	1.23781	0.215785	0.834894	NoSig	FER1L4
PDRG1	908.653	-0.0539759	0.222281	-0.242827	0.808139	0.983492	NoSig	PDRG1
EPB41L1	2270.4	-0.341843	0.398556	-0.857703	0.391056	0.913674	NoSig	EPB41L1
SLC15A1	1.33812	-0.357205	1.21443	-0.294134	0.768655	NA	NoSig	SLC15A1
DOCK9	633.941	0.107825	0.279948	0.385161	0.700118	0.966652	NoSig	DOCK9
ANKRD10	1786.5	0.254456	0.502159	0.506724	0.612349	0.953876	NoSig	ANKRD10
TGDS	259.18	0.0485572	0.462785	0.104924	0.916436	0.993508	NoSig	TGDS
DOCK3	33.8685	-2.78767	0.905843	-3.07743	0.00208791	0.184159	NoSig	DOCK3
C3orf18	543.157	-0.310989	0.287665	-1.08108	0.279662	0.874344	NoSig	C3orf18
COQ9	2514.47	0.140184	0.244678	0.572932	0.566691	0.948599	NoSig	COQ9
TMEM40	21.5808	-5.2805	1.47669	-3.57592	0.000349004	0.0753091	NoSig	TMEM40
KIF9	253.282	-0.661934	0.447195	-1.48019	0.138822	0.775202	NoSig	KIF9
ARHGAP28	100.852	-0.621136	0.598566	-1.03771	0.299407	0.883314	NoSig	ARHGAP28
CRLS1	1174.88	0.245578	0.220304	1.11472	0.264969	0.862865	NoSig	CRLS1
DEFB127	0	NA	NA	NA	NA	NA	NA	DEFB127
PPP1R13B	870.797	-0.671556	0.314571	-2.13483	0.032775	0.540057	NoSig	PPP1R13B
ATRN	3633.2	0.0742797	0.213516	0.347888	0.727924	0.973133	NoSig	ATRN
SMOX	1591.36	-0.788441	0.403416	-1.95441	0.0506527	0.59659	NoSig	SMOX
SIGLEC1	549.376	-0.379049	0.602106	-0.629538	0.528997	0.943248	NoSig	SIGLEC1
FKBP1A	7927.83	-0.132545	0.34597	-0.383113	0.701636	0.967112	NoSig	FKBP1A
NSFL1C	4104.92	-0.26323	0.226471	-1.16232	0.245107	0.8544	NoSig	NSFL1C
SLC4A11	303.449	0.280295	0.57256	0.489547	0.624454	0.955171	NoSig	SLC4A11
C20orf194	1123.1	0.109921	0.328229	0.33489	0.737708	0.975207	NoSig	C20orf194
ZNF343	400.776	-0.23486	0.204003	-1.15126	0.249627	0.857925	NoSig	ZNF343
EBF4	810.785	-1.02391	0.50329	-2.03443	0.041908	0.572831	NoSig	EBF4
CPXM1	993.684	-0.623064	0.934209	-0.666943	0.504809	0.941601	NoSig	CPXM1
MAVS	7316.58	-0.2443	0.230941	-1.05785	0.290126	0.879582	NoSig	MAVS
LZTS3	829.934	-1.09729	0.430932	-2.54632	0.0108866	0.360563	NoSig	LZTS3
F11	0.899745	-1.80399	1.31322	-1.37372	0.169529	NA	NA	F11
XRN2	3530.28	0.270269	0.307948	0.877646	0.380136	0.910722	NoSig	XRN2
KIZ	739.716	-0.49091	0.334531	-1.46746	0.142251	0.776265	NoSig	KIZ
DYNLL1	7737.57	0.43657	0.260074	1.67864	0.0932223	0.710006	NoSig	DYNLL1
TESC	418.604	1.32688	0.777937	1.70564	0.0880754	0.699808	NoSig	TESC
SNX5	3671.62	-0.182883	0.218132	-0.838405	0.401803	0.916548	NoSig	SNX5
RPL6	44202.7	0.293452	0.316387	0.927508	0.353663	0.900447	NoSig	RPL6
SIRPG	36.3921	1.1895	1.45983	0.81482	NA	NA	NA	SIRPG
MAPKAPK5	849.787	0.073172	0.204167	0.358393	0.720049	0.971411	NoSig	MAPKAPK5
P2RX7	7425.17	0.276531	0.44773	0.61763	0.53682	0.94386	NoSig	P2RX7
ESF1	369.593	0.231746	0.455945	0.508277	0.611259	0.953876	NoSig	ESF1
RBBP9	377.886	0.154988	0.392766	0.394608	0.693132	0.965489	NoSig	RBBP9
ANAPC5	4836.92	0.00752505	0.131024	0.0574324	0.954201	0.99705	NoSig	ANAPC5
SLC23A2	3975.48	0.0330916	0.278712	0.118731	0.905489	0.991844	NoSig	SLC23A2
SLC8B1	919.03	-0.0734412	0.268926	-0.273091	0.784784	0.982068	NoSig	SLC8B1
TMEM230	5511.6	0.207684	0.191257	1.08589	0.277528	0.873179	NoSig	TMEM230
DZANK1	89.1917	-0.636379	0.362448	-1.75578	0.0791259	0.679107	NoSig	DZANK1
KDM2B	1174.23	-0.0421649	0.188648	-0.223512	0.823137	0.984564	NoSig	KDM2B
CFAP61	221.338	-4.07326	1.30055	-3.13194	0.00173655	0.167673	NoSig	CFAP61
LHX5	0.397297	0.997993	1.58247	0.630655	0.528266	NA	NA	LHX5
TASP1	198.677	-0.242167	0.361729	-0.669472	0.503195	0.941586	NoSig	TASP1
OAS1	841.672	0.242696	0.804834	0.301548	0.762996	0.980467	NoSig	OAS1
GCN1	7548.32	-0.297477	0.300257	-0.990742	0.321812	0.89027	NoSig	GCN1
RPLP0	113418	-0.0468013	0.335006	-0.139703	0.888895	0.990984	NoSig	RPLP0
PXN	5638.58	-0.400078	0.308042	-1.29878	0.19402	0.816074	NoSig	PXN
SIRT4	68.2369	-0.172592	0.24334	-0.709265	0.47816	0.93623	NoSig	SIRT4
RPH3A	68.747	-4.3203	1.19199	-3.62446	0.000289566	0.0701932	NoSig	RPH3A
KIF16B	581.94	-0.000985712	0.328948	-0.00299656	0.997609	0.999566	NoSig	KIF16B
TRMT6	486.908	0.0445917	0.265606	0.167886	0.866673	0.989237	NoSig	TRMT6
CHGB	368.628	-3.82373	0.971515	-3.93585	8.29044e-05	0.0412233	Down	CHGB
PEBP1	29482.6	-0.0472557	0.256718	-0.184076	0.853954	0.988567	NoSig	PEBP1
TBX5	2.81762	-0.138118	1.29628	-0.10655	0.915146	0.993508	NoSig	TBX5
BRAP	906.704	0.0283829	0.144348	0.196628	0.844119	0.986802	NoSig	BRAP
ERP29	10627.3	-0.0163095	0.307176	-0.053095	0.957656	0.99798	NoSig	ERP29
NOS1	2.67218	-1.41335	1.29704	-1.08967	0.275858	0.872467	NoSig	NOS1
FUS	14355.8	-0.133855	0.233619	-0.572963	0.56667	0.948599	NoSig	FUS
IGBP1	5997.98	0.17081	0.318978	0.53549	0.592311	0.952731	NoSig	IGBP1
FXYD5	8865	1.10207	0.567487	1.94202	0.0521342	0.602122	NoSig	FXYD5
ZNF302	561.303	0.0511012	0.421072	0.12136	0.903406	0.99174	NoSig	ZNF302
GRAMD1A	7892.79	-0.400592	0.353041	-1.13469	0.256505	0.861068	NoSig	GRAMD1A
FXYD3	97.7478	-3.51854	1.02002	-3.44947	0.000561682	0.0898417	NoSig	FXYD3
HEPH	135.789	-0.287925	0.597565	-0.481831	0.629926	0.955528	NoSig	HEPH
CDIP1	5914.94	-0.713281	0.477386	-1.49414	0.135139	0.772635	NoSig	CDIP1
CMTM1	8.90408	0.290582	0.687113	0.422902	0.672367	0.962739	NoSig	CMTM1
KCNH4	8.91821	-0.261655	0.586247	-0.446322	0.655365	0.960361	NoSig	KCNH4
GANAB	25792.9	-0.214658	0.361119	-0.594424	0.552228	0.945939	NoSig	GANAB
GMIP	799.509	-0.0218576	0.400058	-0.054636	0.956428	0.997689	NoSig	GMIP
RBM41	109.787	-0.0120009	0.438579	-0.0273632	0.97817	0.99798	NoSig	RBM41
BIRC5	388.602	0.440382	0.541324	0.813528	0.415915	0.920903	NoSig	BIRC5
LAG3	275.93	0.0080098	1.20969	0.00662135	0.994717	0.999566	NoSig	LAG3
MLF2	9592.31	-0.282508	0.307159	-0.919744	0.357707	0.90275	NoSig	MLF2
OTUB2	150.791	-0.370354	0.372274	-0.994842	0.319813	0.890129	NoSig	OTUB2
DDX24	8226.23	-0.111656	0.218688	-0.510574	0.60965	0.953341	NoSig	DDX24
ZBTB25	339.645	0.239319	0.374042	0.639818	0.522291	0.943248	NoSig	ZBTB25
NECAP1	1012.18	0.319436	0.234258	1.36361	0.172691	0.796102	NoSig	NECAP1
ARHGAP4	752.764	-0.52579	0.453441	-1.15955	0.24623	0.855151	NoSig	ARHGAP4
ANKRD24	116.372	-0.21123	0.418834	-0.504329	0.61403	0.953876	NoSig	ANKRD24
DHX32	1906.72	0.183095	0.240916	0.759997	0.447257	0.928767	NoSig	DHX32
RCOR1	880.232	0.00749579	0.252932	0.0296356	0.976358	0.99798	NoSig	RCOR1
GPATCH2L	1023.61	-0.0649481	0.299658	-0.216741	0.828411	0.985436	NoSig	GPATCH2L
LTBP4	5891.72	-1.02584	0.532	-1.92827	0.0538213	0.608027	NoSig	LTBP4
BLVRB	4048.16	-0.119789	0.29206	-0.410154	0.681693	0.9644	NoSig	BLVRB
SLC9A1	5151.36	-0.876699	0.386327	-2.26932	0.023249	0.489662	NoSig	SLC9A1
SPTLC1	1304.55	0.227415	0.286456	0.793893	0.427258	0.922727	NoSig	SPTLC1
PAPOLA	4529.54	0.104338	0.259834	0.401556	0.688011	0.964801	NoSig	PAPOLA
CCNK	487.136	-0.249732	0.241895	-1.0324	0.301887	0.88423	NoSig	CCNK
PCBP4	1216.69	-1.51152	0.488466	-3.09442	0.00197198	0.178989	NoSig	PCBP4
RGS1	490.035	-1.13396	1.26179	-0.898688	0.368819	0.904369	NoSig	RGS1
YPEL3	4272.51	-0.625361	0.442811	-1.41225	0.157876	0.786744	NoSig	YPEL3
MRPS33	1958.61	0.280381	0.245266	1.14317	0.252967	0.858565	NoSig	MRPS33
NDUFB2	3520.33	0.31167	0.196642	1.58496	0.112975	0.743622	NoSig	NDUFB2
NUDC	7085.55	-0.584771	0.340529	-1.71724	0.0859349	0.695046	NoSig	NUDC
MAEA	3865.88	0.0283809	0.196407	0.1445	0.885105	0.990625	NoSig	MAEA
ICAM1	2648.8	0.00136577	0.367524	0.00371615	0.997035	0.999566	NoSig	ICAM1
STRN4	6053.58	-0.153797	0.303673	-0.506455	0.612537	0.953876	NoSig	STRN4
IRAK3	25.6243	-0.0930034	0.539147	-0.172501	0.863044	0.989237	NoSig	IRAK3
LYZ	915.882	0.422484	0.983382	0.429623	0.66747	0.961947	NoSig	LYZ
SI	0.0742072	-0.248944	5.65541	-0.0440186	0.96489	NA	NoSig	SI
MUL1	2477.27	-0.391202	0.328526	-1.19078	0.23374	0.846855	NoSig	MUL1
TFAP4	1506.08	-0.339417	0.28899	-1.1745	0.240196	0.851292	NoSig	TFAP4
PDCD7	1113.03	-0.126004	0.174881	-0.72051	0.471211	0.935901	NoSig	PDCD7
SPG21	5550.28	0.0696602	0.233738	0.298027	0.765683	0.980568	NoSig	SPG21
FETUB	0.661514	0.185102	1.23782	0.14954	0.881128	NA	NoSig	FETUB
DNAJB11	1749.06	-0.0600613	0.225752	-0.266049	0.790201	0.982068	NoSig	DNAJB11
P3H2	93.7611	-0.546858	0.758603	-0.720875	0.470987	0.935901	NoSig	P3H2
THPO	4.43822	0.710244	0.647449	1.09699	0.272647	0.869648	NoSig	THPO
CHRD	78.5792	0.459469	0.545972	0.841562	0.400033	0.91622	NoSig	CHRD
FLT3LG	87.555	-0.443062	0.631627	-0.701462	0.483015	0.937358	NoSig	FLT3LG
RAB11FIP3	2392.45	0.104142	0.250276	0.416108	0.677331	0.964105	NoSig	RAB11FIP3
GNPTG	4592.1	0.311191	0.224512	1.38607	0.165724	0.790723	NoSig	GNPTG
ZNF268	496.391	0.268568	0.399975	0.671463	0.501925	0.941586	NoSig	ZNF268
GOLGA3	3131.28	0.102255	0.16608	0.6157	0.538093	0.943887	NoSig	GOLGA3
PABPC4	16993.8	-0.394761	0.381518	-1.03471	0.300804	0.88423	NoSig	PABPC4
CD209	446.285	-0.0685296	0.782068	-0.0876261	0.930174	0.995162	NoSig	CD209
CERS4	5601.26	-0.447447	0.360514	-1.24114	0.214556	0.834112	NoSig	CERS4
MCOLN1	3232.45	-0.167811	0.371103	-0.452196	0.651128	0.96003	NoSig	MCOLN1
USP48	2917.89	0.0286231	0.35566	0.0804789	0.935856	0.995665	NoSig	USP48
EFNB1	589.547	-0.160063	0.228182	-0.701471	0.483009	0.937358	NoSig	EFNB1
PDPR	2543.36	-0.746759	0.321219	-2.32477	0.0200845	0.459731	NoSig	PDPR
AARS1	9838.92	-0.217085	0.349277	-0.621526	0.534254	0.943248	NoSig	AARS1
GLG1	8972.39	-0.272288	0.252369	-1.07893	0.28062	0.875443	NoSig	GLG1
KIF4A	370.868	-0.0707731	0.642227	-0.110199	0.912251	0.992842	NoSig	KIF4A
TNRC6A	1576.21	-0.163159	0.325751	-0.500872	0.616461	0.954299	NoSig	TNRC6A
PLEKHG2	703.488	0.142988	0.450837	0.31716	0.751122	0.978309	NoSig	PLEKHG2
DLL3	507.138	-4.12646	1.04843	-3.93586	8.28996e-05	0.0412233	Down	DLL3
NAT14	3343.63	-0.358036	0.382116	-0.936982	0.348768	0.898816	NoSig	NAT14
PITPNM2	897.55	0.324716	0.353042	0.919768	0.357694	0.90275	NoSig	PITPNM2
EXOC1	947.005	0.414827	0.345374	1.2011	0.229714	0.843258	NoSig	EXOC1
RBM27	435.918	0.240885	0.35649	0.675711	0.499224	0.940996	NoSig	RBM27
POU4F3	1.42017	0.553642	0.801601	0.69067	0.489773	NA	NA	POU4F3
OSBPL8	2141.12	-0.0307972	0.53554	-0.0575068	0.954141	0.99705	NoSig	OSBPL8
DTX2	691.457	-0.0894986	0.298311	-0.300018	0.764164	0.980568	NoSig	DTX2
NLRC4	29.964	0.0510501	0.562664	0.0907292	0.927708	0.994052	NoSig	NLRC4
PUS7	452.586	0.366548	0.333747	1.09828	0.272082	0.868935	NoSig	PUS7
LAMB4	1.37082	-0.811084	1.075	-0.754496	0.450552	NA	NA	LAMB4
NRCAM	457.59	-0.215467	0.843565	-0.255425	0.798395	0.983058	NoSig	NRCAM
LAMB1	767.832	-0.107586	0.585604	-0.183718	0.854234	0.988617	NoSig	LAMB1
SLC26A4	17.8775	-0.543767	0.81229	-0.669426	0.503224	0.941586	NoSig	SLC26A4
SLC26A3	0.817213	-1.05606	1.18433	-0.891698	0.372555	NA	NA	SLC26A3
DLD	2277.54	0.605563	0.285144	2.12371	0.0336944	0.544275	NoSig	DLD
WDR7	570.845	0.119061	0.254264	0.468257	0.639601	0.95743	NoSig	WDR7
TXNL1	2423.33	0.174833	0.219267	0.797352	0.425247	0.922727	NoSig	TXNL1
IL5RA	3.84773	0.127115	0.961468	0.13221	0.894819	0.991023	NoSig	IL5RA
ABCC6	40.7914	0.0646561	0.399361	0.161899	0.871385	0.989428	NoSig	ABCC6
CMTM6	1444.12	-0.228732	0.317766	-0.719813	0.47164	0.935901	NoSig	CMTM6
ITGA6	408.294	0.992972	0.491528	2.02017	0.0433655	0.576614	NoSig	ITGA6
RAPGEF4	1141.56	0.814802	0.749024	1.08782	0.276675	0.872865	NoSig	RAPGEF4
MAP3K20	580.041	0.627841	0.534918	1.17371	0.24051	0.851292	NoSig	MAP3K20
SMPX	0.443657	-0.847965	1.66603	-0.508973	0.610771	NA	NA	SMPX
FH	3238.53	0.109176	0.205373	0.531597	0.595005	0.952731	NoSig	FH
SEL1L3	529.412	1.24825	0.848404	1.4713	0.141211	0.776265	NoSig	SEL1L3
TF	1518.46	-0.653985	1.34702	-0.485504	NA	NA	NA	TF
CDV3	5135.71	-0.354464	0.300963	-1.17776	0.238891	0.850919	NoSig	CDV3
MYO15A	62.1855	0.0788127	0.346919	0.227179	0.820285	0.984564	NoSig	MYO15A
ALKBH5	5668.09	-0.105896	0.238129	-0.444701	0.656536	0.960361	NoSig	ALKBH5
APOH	0.488565	-1.6848	2.70971	-0.621764	0.534097	NA	NA	APOH
NLRP1	326.963	-1.0568	0.58882	-1.79478	0.0726892	0.663985	NoSig	NLRP1
PITPNM3	45.6819	-0.817151	0.539877	-1.51359	0.13013	0.764963	NoSig	PITPNM3
SPAG7	3424.99	0.228172	0.257711	0.885382	0.375951	0.909333	NoSig	SPAG7
ORC6	82.8785	0.0577057	0.562809	0.102532	0.918335	0.993572	NoSig	ORC6
ZFHX4	44.7439	1.54875	0.726665	2.13132	0.033063	0.541934	NoSig	ZFHX4
SLC17A6	0.806164	-2.41509	2.3034	-1.04849	0.294414	NA	NA	SLC17A6
CPA1	1.0833	-2.77655	1.96181	-1.4153	0.15698	NA	NA	CPA1
ZC3HC1	941.453	0.279741	0.170947	1.63642	0.101752	0.731256	NoSig	ZC3HC1
ESR1	211.452	0.191342	0.742503	0.257699	0.796639	0.982673	NoSig	ESR1
RGS17	14.5305	0.165927	0.826675	0.200716	0.840921	0.98646	NoSig	RGS17
ANGPT2	95.0937	0.448463	0.568819	0.788412	0.430456	0.924316	NoSig	ANGPT2
TMEM101	5507.98	-0.772485	0.498064	-1.55098	0.120907	0.756261	NoSig	TMEM101
CD200	472.567	0.140827	0.633873	0.222169	0.824182	0.984604	NoSig	CD200
CCDC80	686.577	-2.57325	0.810706	-3.17409	0.00150309	0.160655	NoSig	CCDC80
CMA1	0.567916	0.285057	1.35856	0.209822	0.833806	NA	NoSig	CMA1
PSME1	5996.19	0.332926	0.297093	1.12061	0.262452	0.862263	NoSig	PSME1
PPP2R3C	658.039	0.500051	0.365105	1.36961	0.170809	0.795522	NoSig	PPP2R3C
HAUS4	1118.98	-0.00738764	0.347548	-0.0212565	0.983041	0.99798	NoSig	HAUS4
JPH4	106.646	-2.52392	0.804904	-3.13568	0.00171457	0.167673	NoSig	JPH4
MYH7	122.475	-2.84805	0.764872	-3.72356	0.000196433	0.0599069	NoSig	MYH7
CEBPE	3.96673	-0.398821	0.869273	-0.458798	0.646379	0.958009	NoSig	CEBPE
SLC7A8	59052.6	0.115053	0.379017	0.303556	0.761467	0.980069	NoSig	SLC7A8
OSGEP	1134.42	0.0862354	0.210495	0.40968	0.682041	0.9644	NoSig	OSGEP
SLC22A17	1752.95	0.273439	0.543806	0.502824	0.615088	0.953876	NoSig	SLC22A17
RNF31	1251.42	-0.454352	0.337898	-1.34464	0.178741	0.800651	NoSig	RNF31
SCFD1	1134.46	0.498391	0.350849	1.42053	0.155454	0.785823	NoSig	SCFD1
G2E3	201.623	0.177826	0.508566	0.349662	0.726592	0.973133	NoSig	G2E3
HECTD1	11864.4	0.445983	0.374358	1.19133	0.233526	0.846772	NoSig	HECTD1
HNRNPC	16202.8	0.176391	0.161862	1.08976	0.275818	0.872467	NoSig	HNRNPC
RPGRIP1	21.8357	-0.0446144	0.459311	-0.0971333	0.922621	0.993572	NoSig	RPGRIP1
SUPT16H	5127.05	0.272893	0.232876	1.17184	0.241263	0.851878	NoSig	SUPT16H
TOX4	3095.37	-0.079857	0.194339	-0.410916	0.681134	0.9644	NoSig	TOX4
GEMIN2	112.509	0.177252	0.257555	0.688208	0.491322	0.939718	NoSig	GEMIN2
TGM1	24.7042	-0.689069	0.596265	-1.15564	0.247828	0.856567	NoSig	TGM1
TINF2	1807.71	0.0447328	0.208134	0.214923	0.829828	0.985497	NoSig	TINF2
DAZL	0.0568521	-0.362093	5.17941	-0.0699101	0.944265	NA	NoSig	DAZL
TBL1Y	0.75756	-1.44419	2.1897	-0.659537	0.509551	NA	NA	TBL1Y
SEMA6A	6157.95	-1.48817	0.566308	-2.62785	0.0085927	0.331995	NoSig	SEMA6A
TRPM7	1180.66	0.257821	0.448178	0.575266	0.565112	0.948404	NoSig	TRPM7
TYRO3	10146.9	0.135633	0.338175	0.401072	0.688367	0.964869	NoSig	TYRO3
WDR76	143.347	-0.35577	0.277859	-1.2804	0.200405	0.823991	NoSig	WDR76
CAPN3	3810.76	-0.0726348	0.516734	-0.140565	0.888213	0.990984	NoSig	CAPN3
SNAP23	1369.49	0.212529	0.26406	0.804854	0.420904	0.921897	NoSig	SNAP23
TBX15	12.5497	-0.503929	0.59368	-0.848822	0.39598	0.914699	NoSig	TBX15
PHGDH	3323.87	-0.629378	0.794061	-0.792606	0.428007	0.923007	NoSig	PHGDH
COL9A3	2553.64	1.0178	0.973527	1.04548	0.295802	0.882263	NoSig	COL9A3
EZR	6915.37	0.345957	0.429372	0.805728	0.4204	0.921897	NoSig	EZR
MYL6	19761.5	0.144402	0.256518	0.562932	0.573481	0.949525	NoSig	MYL6
AGO1	1509.05	-0.60811	0.276896	-2.19616	0.0280803	0.517133	NoSig	AGO1
TEKT2	17.0077	-2.04975	0.752162	-2.72514	0.00642734	0.293099	NoSig	TEKT2
CLSPN	47.5113	-0.109793	0.570042	-0.192605	0.847268	0.98718	NoSig	CLSPN
RFFL	230.912	0.0436282	0.259394	0.168193	0.866432	0.989237	NoSig	RFFL
UNC13D	237.16	0.0359991	0.500966	0.0718593	0.942714	0.99592	NoSig	UNC13D
MFSD11	896.612	-0.257626	0.26736	-0.963592	0.33525	0.894562	NoSig	MFSD11
DPYSL2	2364.01	-1.02803	0.525402	-1.95665	0.0503887	0.59627	NoSig	DPYSL2
TGFB2	57.6005	0.1073	0.680734	0.157623	0.874754	0.989779	NoSig	TGFB2
GPATCH2	281.807	0.123708	0.335326	0.36892	0.712187	0.970124	NoSig	GPATCH2
NUP50	1308.6	0.159269	0.254647	0.62545	0.531676	0.943248	NoSig	NUP50
CDC45	124.258	-0.235704	0.44542	-0.529172	0.596686	0.952731	NoSig	CDC45
COMT	13106.4	0.420216	0.424087	0.990873	0.321748	0.89027	NoSig	COMT
ADA2	1931.65	0.318985	0.676677	0.471399	0.637356	0.956742	NoSig	ADA2
AC016026.1	24.9666	-0.283197	0.75054	-0.377324	0.705933	0.968517	NoSig	AC016026.1
VNN3	0.500062	-1.78288	1.49641	-1.19143	0.233484	NA	NA	VNN3
ECHDC1	1055.07	-0.00716823	0.360686	-0.0198739	0.984144	0.99798	NoSig	ECHDC1
LRRFIP2	1719.24	-0.321723	0.264573	-1.21601	0.223981	0.839471	NoSig	LRRFIP2
[truncated: 53,105 more rows]

## Sheet: DLL3 high vs. low
	baseMean	log2FoldChange	lfcSE	stat	pvalue	padj	change
TSPAN6	1480.15	0.680492	0.119083	5.71441	1.10083e-08	1.04327e-06	NoSig
TNMD	0.125446	0.795451	1.55744	0.510743	0.609531	NA	NoSig
DPM1	650.311	-0.105219	0.0953642	-1.10334	0.26988	0.474895	NoSig
SCYL3	427.53	-0.0611287	0.0884698	-0.690955	0.489594	0.678721	NoSig
C1orf112	137.344	-0.0207235	0.0983295	-0.210756	0.833078	0.91382	NoSig
FGR	86.8903	0.0251358	0.313919	0.0800708	0.936181	0.96855	NoSig
CFH	322.706	0.287525	0.281644	1.02088	0.30731	0.514718	NoSig
FUCA2	3323.45	-0.202931	0.115282	-1.76031	0.0783559	0.21613	NoSig
GCLC	929.713	0.14092	0.142265	0.990546	0.321907	0.52952	NoSig
NFYA	1625.56	0.475378	0.134378	3.53762	0.000403752	0.00445004	NoSig
STPG1	637.151	0.607324	0.174638	3.47761	0.000505901	0.00532928	NoSig
NIPAL3	1766.02	0.456425	0.203018	2.2482	0.0245632	0.0961501	NoSig
LAS1L	2524.86	0.0301342	0.0820207	0.367398	0.713322	0.841902	NoSig
ENPP4	50.1553	-1.01824	0.30533	-3.33489	0.000853324	0.00797941	Down
SEMA3F	322.194	-0.446314	0.217935	-2.04792	0.0405676	0.1366	NoSig
CFTR	1.36283	-0.123603	0.670446	-0.184359	0.853732	0.925285	NoSig
ANKIB1	948.108	-0.115754	0.163924	-0.706145	0.480098	0.671147	NoSig
CYP51A1	158.492	-0.298247	0.19992	-1.49183	0.135743	0.309102	NoSig
KRIT1	658.304	-0.246711	0.174083	-1.4172	0.156423	0.337106	NoSig
RAD52	270.289	-0.0807022	0.167751	-0.481082	0.630458	0.785606	NoSig
MYH16	3.70497	0.139759	0.278931	0.501052	0.616335	0.775487	NoSig
BAD	2534.55	-0.110998	0.156007	-0.711496	0.476777	0.668211	NoSig
LAP3	2237.68	-0.297768	0.22404	-1.32909	0.183819	0.373304	NoSig
CD99	11581.1	0.410127	0.189334	2.16616	0.030299	0.111301	NoSig
HS3ST1	25.6519	-0.284919	0.288349	-0.988107	0.3231	0.530353	NoSig
AOC1	12.7488	-0.343559	0.33557	-1.02381	0.305926	0.513389	NoSig
WNT16	0.737341	0.551893	0.647898	0.851821	0.394313	0.597634	NoSig
HECW1	16.1225	-1.6388	0.603504	-2.71548	0.00661804	0.0370828	Down
MAD1L1	5265.07	-0.537335	0.214078	-2.51	0.0120732	0.0579719	NoSig
LASP1	10388.4	0.348376	0.156013	2.233	0.0255492	0.0988792	NoSig
SNX11	1009.91	0.113837	0.114583	0.993494	0.320469	0.528093	NoSig
TMEM176A	645.415	-0.652579	0.31354	-2.08132	0.0374042	0.128945	NoSig
M6PR	3422.84	0.261853	0.0978031	2.67735	0.00742076	0.0402869	NoSig
KLHL13	164.877	0.55004	0.262969	2.09165	0.0364697	0.126722	NoSig
CYP26B1	763.174	0.342388	0.253895	1.34854	0.177485	0.365087	NoSig
ICA1	449.352	-0.261993	0.181175	-1.44607	0.148157	0.325959	NoSig
DBNDD1	7798.1	-0.00605022	0.198301	-0.0305103	0.97566	0.988399	NoSig
ALS2	1209.17	0.161002	0.103468	1.55605	0.119697	0.286195	NoSig
CASP10	75.2113	-0.401943	0.23308	-1.72449	0.0846202	0.227347	NoSig
CFLAR	2145.93	-0.296395	0.0989345	-2.99588	0.00273658	0.0193623	NoSig
TFPI	202.677	0.862644	0.335497	2.57124	0.0101335	0.0508422	NoSig
NDUFAF7	467.683	0.076705	0.121102	0.633394	0.526476	0.707366	NoSig
RBM5	2545.82	0.179495	0.117431	1.52851	0.126387	0.295738	NoSig
MTMR7	19.3441	-0.0104708	0.234698	-0.0446141	0.964415	0.982896	NoSig
SLC7A2	611.504	0.80591	0.246568	3.26851	0.00108114	0.00952438	NoSig
ARF5	5519.9	0.173436	0.123816	1.40076	0.161285	0.343578	NoSig
SARM1	396.763	-0.303242	0.157382	-1.92679	0.0540062	0.166536	NoSig
POLDIP2	7424.08	0.178963	0.130487	1.3715	0.170218	0.355198	NoSig
PLXND1	7750.83	0.664181	0.200534	3.31206	0.000926115	0.00846641	NoSig
AK2	4216.44	0.22508	0.11086	2.03031	0.0423252	0.140788	NoSig
CD38	79.6497	-1.61855	0.3222	-5.02344	5.07531e-07	2.15182e-05	Down
FKBP4	9540.15	0.276588	0.15069	1.83548	0.0664348	0.191797	NoSig
KDM1A	3240.66	0.50274	0.119023	4.22388	2.40135e-05	0.000479727	NoSig
RBM6	1681.85	0.288638	0.150603	1.91655	0.055295	0.169269	NoSig
CAMKK1	603.246	-0.165592	0.128801	-1.28564	0.198567	0.392591	NoSig
RECQL	303.656	-0.596783	0.268594	-2.22188	0.0262917	0.100728	NoSig
VPS50	567.382	-0.284666	0.158683	-1.79393	0.0728247	0.204763	NoSig
HSPB6	834.427	0.439254	0.397147	1.10602	0.268716	0.473852	NoSig
ARHGAP33	144.817	-0.144553	0.190921	-0.757132	0.448971	0.645302	NoSig
NDUFAB1	1930.79	0.00392386	0.0767135	0.0511495	0.959206	0.980608	NoSig
PDK4	1131.58	1.9461	0.392064	4.96373	6.91503e-07	2.76894e-05	Up
SLC22A16	2.74534	-1.2153	0.469153	-2.59042	0.00958598	0.0487948	Down
ZMYND10	30.4609	0.212137	0.265069	0.800311	0.423531	0.623258	NoSig
ABCB5	7920.7	0.0258459	0.126054	0.205038	0.837542	0.916551	NoSig
ARX	487.371	-1.52117	0.636679	-2.38923	0.0168836	0.0736581	NoSig
SLC25A13	1944.16	-0.173499	0.110634	-1.56823	0.116827	0.28172	NoSig
ST7	1911.48	0.219196	0.117294	1.86877	0.0616542	0.182576	NoSig
CDC27	1271.13	-0.453887	0.145691	-3.1154	0.00183693	0.0143502	NoSig
SLC4A1	0.787419	-0.640614	0.571156	-1.12161	0.262029	0.466354	NoSig
CALCR	3.3678	-0.490987	0.48479	-1.01278	0.311163	0.518302	NoSig
HCCS	817.625	-0.0204823	0.0824637	-0.24838	0.803841	0.897822	NoSig
DVL2	2761.74	0.429914	0.10966	3.92042	8.8396e-05	0.0013518	NoSig
PRSS22	0.781367	0.96404	0.597632	1.6131	0.106723	0.265032	NoSig
UPF1	6479.82	0.160231	0.0926648	1.72914	0.0837834	0.225838	NoSig
SKAP2	128.638	-0.0891692	0.259469	-0.34366	0.731102	0.853024	NoSig
SLC25A5	16769.9	0.0486419	0.104462	0.465643	0.641471	0.793695	NoSig
MCUB	295.358	-0.990789	0.274821	-3.60521	0.000311898	0.00364444	NoSig
HOXA11	39.4308	3.25438	0.656958	4.95371	7.28109e-07	2.90279e-05	Up
POLR2J	2004.49	-0.124603	0.135529	-0.919383	0.357895	0.564361	NoSig
DHX33	1237.29	0.106273	0.0881643	1.2054	0.22805	0.426981	NoSig
MEOX1	15.9285	1.30364	0.415927	3.13431	0.00172261	0.0136305	Up
THSD7A	23.3024	-0.631183	0.287956	-2.19194	0.0283836	0.106123	NoSig
LIG3	1535.94	-0.219567	0.165418	-1.32734	0.184395	0.373965	NoSig
RPAP3	430.583	-0.276302	0.179774	-1.53694	0.124308	0.293029	NoSig
ACSM3	51.0716	1.53077	0.283893	5.39207	6.96491e-08	4.56368e-06	Up
REXO5	106.47	-0.10895	0.159096	-0.684807	0.493466	0.681893	NoSig
CIAPIN1	2311.52	-0.108244	0.0955997	-1.13227	0.257522	0.461435	NoSig
SPPL2B	2226.83	-0.00295959	0.117772	-0.0251297	0.979951	0.99054	NoSig
FAM214B	900.251	-0.275561	0.104814	-2.62903	0.0085628	0.0447997	NoSig
COPZ2	538.562	0.741424	0.188257	3.93837	8.20381e-05	0.00127267	NoSig
PRKAR2B	111.732	-0.614686	0.242344	-2.53642	0.0111991	0.0548421	NoSig
MSL3	614.689	-0.0429968	0.119281	-0.360465	0.7185	0.845002	NoSig
CREBBP	6036.68	0.0261832	0.0896598	0.292029	0.770265	0.877502	NoSig
TSPOAP1	686.897	0.351678	0.141012	2.49395	0.0126331	0.0599874	NoSig
MPO	21.8947	0.334533	0.303396	1.10263	0.270189	0.475196	NoSig
PON1	1.91688	2.16867	0.661179	3.28	0.00103806	0.00927007	Up
GCFC2	703.731	-0.0946729	0.148932	-0.635679	0.524986	0.706299	NoSig
WDR54	565.847	-0.301191	0.191038	-1.5766	0.114887	0.278563	NoSig
CROT	284.406	0.0904584	0.159475	0.567225	0.570561	0.741429	NoSig
ABCB4	132.612	-1.49	0.32287	-4.61485	3.93375e-06	0.00011173	Down
KMT2E	2274.01	-0.190569	0.112996	-1.68652	0.0916958	0.240032	NoSig
RHBDD2	6082.67	-0.251279	0.170362	-1.47498	0.140219	0.315257	NoSig
SOX8	2338.93	0.0864703	0.249054	0.347195	0.728445	0.851641	NoSig
IBTK	1004.43	-0.0893636	0.176441	-0.506478	0.612521	0.77257	NoSig
ZNF195	352.063	-0.0484697	0.186944	-0.259274	0.795424	0.892806	NoSig
MYCBP2	2710.45	-0.186816	0.135999	-1.37366	0.169549	0.354432	NoSig
FBXL3	561.157	0.0100285	0.18978	0.0528427	0.957857	0.979994	NoSig
ITGAL	348.652	-0.986549	0.400308	-2.46447	0.0137215	0.0637522	NoSig
PDK2	1597.08	0.323372	0.163248	1.98086	0.0476064	0.153093	NoSig
ITGA3	10624.4	-0.134037	0.228031	-0.587803	0.556665	0.730708	NoSig
ZFX	780.103	0.0416896	0.154353	0.270093	0.787089	0.888568	NoSig
LAMP2	7363.15	-0.163927	0.0961225	-1.70539	0.0881208	0.233576	NoSig
ITGA2B	24.1866	-0.205215	0.252685	-0.812139	0.416712	0.617537	NoSig
ASB4	3.35125	2.59265	0.552854	4.68958	2.73761e-06	8.30432e-05	Up
GDE1	2055.67	-0.126672	0.0868228	-1.45897	0.144574	0.321276	NoSig
REX1BD	1815.55	0.0458434	0.131803	0.347818	0.727977	0.851275	NoSig
CRLF1	142.237	-0.0764299	0.263287	-0.290291	0.771593	0.878134	NoSig
OSBPL7	685.129	0.217038	0.143829	1.509	0.131299	0.302529	NoSig
TMEM98	8101.87	0.0274346	0.122748	0.223504	0.823143	0.907758	NoSig
YBX2	56.5869	0.0512335	0.247784	0.206767	0.836192	0.915476	NoSig
KRT33A	0.0710516	0.282386	1.99556	0.141507	0.887469	NA	NoSig
MAP3K14	698.04	-0.244002	0.111889	-2.18075	0.0292016	0.108353	NoSig
ABCC8	7.09831	0.0930976	0.503217	0.185005	0.853225	0.925065	NoSig
CACNG3	3.22048	0.763646	0.833722	0.915949	0.359694	0.565829	NoSig
TMEM132A	789.458	-0.00402629	0.26172	-0.015384	0.987726	0.994303	NoSig
AP2B1	11467.9	-0.111799	0.0877509	-1.27404	0.202648	0.396933	NoSig
TAC1	3.34419	-1.73791	0.672152	-2.58559	0.00972134	0.0492614	Down
ZNF263	1280.32	0.0937552	0.0611847	1.53233	0.125441	0.294555	NoSig
CX3CL1	808.861	-0.028669	0.22419	-0.127878	0.898245	0.949153	NoSig
SPATA20	11811.6	-0.255429	0.175284	-1.45723	0.145052	0.321885	NoSig
CACNA1G	6.09162	0.234027	0.435585	0.537271	0.59108	0.757145	NoSig
TNFRSF12A	514.189	-0.613219	0.251663	-2.43666	0.0148236	0.0673081	NoSig
DLX6	4.31859	0.895523	0.457535	1.95728	0.0503151	0.158838	NoSig
MAP3K9	307.678	0.315514	0.144812	2.17878	0.0293478	0.108722	NoSig
RALA	1351.4	0.0232908	0.0760241	0.306361	0.75933	0.86987	NoSig
BAIAP2L1	2593.41	0.325423	0.127879	2.54476	0.0109352	0.053906	NoSig
KDM7A	450.326	-0.38139	0.185033	-2.0612	0.0392842	0.13356	NoSig
ETV1	671.279	0.850829	0.31456	2.70482	0.00683406	0.0379671	NoSig
AGK	1068.34	-0.0592266	0.0587851	-1.00751	0.31369	0.520814	NoSig
ALDH3B1	3761.97	0.440412	0.212648	2.07109	0.0383505	0.131318	NoSig
TTC22	9.19692	0.0144	0.407758	0.0353151	0.971829	0.986418	NoSig
PHTF2	280.623	-0.293474	0.209423	-1.40135	0.161111	0.343371	NoSig
CCL26	11.2969	-0.858512	0.382991	-2.2416	0.0249874	0.0973097	NoSig
FARP2	3166.44	0.11388	0.111639	1.02007	0.307697	0.514941	NoSig
USH1C	19.9094	-0.830761	0.549643	-1.51146	0.130672	0.30184	NoSig
GGCT	1453.93	0.0886554	0.102272	0.866856	0.386021	0.589732	NoSig
DBF4	165.145	-0.111259	0.208031	-0.534818	0.592776	0.75828	NoSig
TBXA2R	162.173	0.212237	0.235918	0.899622	0.368322	0.573571	NoSig
IFRD1	1148.48	-0.0335209	0.191411	-0.175126	0.860981	0.929793	NoSig
LGALS14	0.0985364	-0.516152	2.22242	-0.232248	0.816346	NA	NoSig
COX10	602.481	-0.0681161	0.0693261	-0.982547	0.325831	0.53336	NoSig
GTF2IRD1	1947.42	0.369934	0.129027	2.86712	0.00414232	0.0264837	NoSig
PAF1	4512.85	-0.134208	0.102306	-1.31183	0.189577	0.380949	NoSig
VPS41	3141.07	-0.133449	0.104275	-1.27978	0.200621	0.394756	NoSig
ARHGAP44	109.628	-0.592282	0.227553	-2.60283	0.00924573	0.0474571	NoSig
ELAC2	4527.39	0.0355816	0.103903	0.342449	0.732013	0.853633	NoSig
SCIN	2425.64	4.29166	0.540815	7.93555	2.09568e-15	2.73327e-12	Up
ARSD	3694.53	-0.0346692	0.130977	-0.264697	0.791243	0.890916	NoSig
PNPLA4	1353.91	0.105651	0.146117	0.723054	0.469647	0.662161	NoSig
MYH13	0.281863	0.908582	1.13056	0.803653	0.421597	NA	NoSig
ADIPOR2	7613.15	0.0677526	0.097283	0.696449	0.486148	0.675894	NoSig
CDKL3	22.3676	-0.328702	0.163017	-2.01636	0.0437623	0.144129	NoSig
UPP2	1.09436	-0.493602	0.416265	-1.18579	0.235706	0.436374	NoSig
PRSS21	20.1745	-0.40896	0.714106	-0.572688	0.566856	0.739135	NoSig
MARK4	4489.37	0.298037	0.152913	1.94906	0.0512884	0.160891	NoSig
PROM1	44.243	-0.466463	0.427044	-1.09231	0.274699	0.480166	NoSig
CCDC124	5274.38	0.155966	0.159016	0.98082	0.326681	0.534146	NoSig
CEACAM21	16.752	-0.375924	0.327931	-1.14635	0.25165	0.45441	NoSig
PAFAH1B1	4564.69	-0.298144	0.109713	-2.7175	0.00657773	0.0369251	NoSig
NOS2	48.8914	-0.0905036	0.226555	-0.399477	0.689542	0.826551	NoSig
DNAH9	9.98522	0.517279	0.260366	1.98674	0.0469512	0.151698	NoSig
KIAA0100	9715.44	-0.141524	0.104064	-1.35998	0.173837	0.360235	NoSig
SLC13A2	0.200893	0.643736	1.13962	0.56487	0.572162	NA	NoSig
GAS7	2092.25	-0.193962	0.219071	-0.885383	0.37595	0.580735	NoSig
TRAPPC6A	1887.01	0.524083	0.154975	3.38173	0.000720308	0.00700337	NoSig
MATK	761.133	-0.541141	0.424466	-1.27487	0.202354	0.396603	NoSig
CEACAM7	0.262015	0.893256	1.5189	0.588094	0.556469	NA	NoSig
CD79B	1654.91	-0.853141	0.26688	-3.19672	0.00139	0.011549	NoSig
SCN4A	25.2583	-0.111034	0.272963	-0.406772	0.684176	0.823222	NoSig
ST7L	649.526	-0.2067	0.106832	-1.93481	0.0530139	0.164551	NoSig
TKTL1	88.5902	1.14976	0.42112	2.73024	0.00632891	0.0358813	Up
PAX6	115.572	-0.726603	0.278967	-2.60462	0.00919761	0.0472899	NoSig
RPUSD1	2250.75	0.492937	0.170135	2.89733	0.00376351	0.0245484	NoSig
RHBDF1	1785.55	-0.124308	0.147165	-0.844689	0.398285	0.600761	NoSig
LUC7L	1649.37	-0.109416	0.124198	-0.880978	0.37833	0.582852	NoSig
CACNA2D2	621.997	0.235982	0.205557	1.14801	0.250964	0.453587	NoSig
BAIAP3	996.47	-0.25421	0.269792	-0.942244	0.346068	0.552375	NoSig
TSR3	3963.7	0.24909	0.154409	1.61318	0.106705	0.26501	NoSig
PIGQ	5215.55	0.173901	0.1533	1.13438	0.256635	0.460614	NoSig
CRAMP1	642.411	0.18006	0.0689256	2.61238	0.00899152	0.046488	NoSig
TEAD3	1283.79	0.723066	0.13368	5.40894	6.33979e-08	4.22483e-06	NoSig
SELE	5.31678	0.0887418	0.45799	0.193764	0.846361	0.921379	NoSig
DNAJC11	2026.2	0.122366	0.126572	0.966777	0.333656	0.540771	NoSig
FMO3	64.0502	-0.503985	0.328725	-1.53315	0.125239	0.294283	NoSig
MYLIP	2258.74	0.575989	0.149642	3.84911	0.000118547	0.00169841	NoSig
NOX1	28.4684	-0.290347	0.152051	-1.90954	0.0561926	0.171216	NoSig
E2F2	77.9933	0.0424164	0.231977	0.182848	0.854918	0.925888	NoSig
PSMB1	5060.59	-0.245406	0.101616	-2.41504	0.0157334	0.0702722	NoSig
SYN1	109.312	0.688703	0.359144	1.91762	0.0551586	0.169043	NoSig
JARID2	2064.27	0.995986	0.147772	6.74002	1.58369e-11	4.76436e-09	NoSig
CDKL5	193.553	-0.186351	0.165023	-1.12925	0.258794	0.462852	NoSig
CAMK1G	53.4366	-0.596411	0.298893	-1.9954	0.0459997	0.149435	NoSig
CDK11A	210.065	0.0359857	0.103975	0.346099	0.729268	0.85213	NoSig
NADK	1917.42	-0.147988	0.118644	-1.24733	0.212278	0.408856	NoSig
TFAP2B	3.87033	0.465644	0.708868	0.656884	0.511256	0.696344	NoSig
TFAP2D	0.063481	0.21025	2.3174	0.0907266	0.92771	NA	NoSig
DLEC1	40.8079	0.522578	0.273497	1.91073	0.0560398	0.170807	NoSig
CYTH3	2762.2	-0.327724	0.105345	-3.11095	0.00186486	0.0145197	NoSig
ADAM22	57.9528	-1.01544	0.231334	-4.38951	1.13605e-05	0.00026016	Down
SYPL1	2808.25	-0.142809	0.0768852	-1.85743	0.0632503	0.185716	NoSig
CYB561	1260.56	0.336666	0.124192	2.71085	0.00671111	0.0374588	NoSig
SPAG9	4325.69	-0.198536	0.133263	-1.4898	0.136276	0.309824	NoSig
CELSR3	77.7825	0.895481	0.209034	4.2839	1.83642e-05	0.000386609	NoSig
AASS	350.41	-0.458251	0.185499	-2.47037	0.0134972	0.0630412	NoSig
PLEKHG6	15.4413	-1.00707	0.297003	-3.39078	0.000696952	0.00683083	Down
SS18L2	445.413	0.312418	0.0928533	3.36464	0.000766429	0.00734233	NoSig
MPND	1699.61	0.0171364	0.154885	0.110639	0.911902	0.956081	NoSig
MGST1	442.133	-0.696067	0.297492	-2.33979	0.0192948	0.0812024	NoSig
CRY1	419.838	0.131491	0.15601	0.842835	0.399321	0.601691	NoSig
PGLYRP1	0.857814	0.451048	0.523993	0.860791	0.389353	0.592712	NoSig
NFIX	10406.4	-0.0346886	0.170685	-0.203232	0.838954	0.917206	NoSig
ST3GAL1	12441.6	-0.571111	0.173918	-3.28379	0.00102423	0.0091735	NoSig
MMP25	40.8763	-1.35008	0.368994	-3.65883	0.000253373	0.00309458	Down
IL32	365.118	-1.07722	0.362654	-2.97039	0.00297426	0.0205349	Down
PKD1	3953.39	0.327462	0.115702	2.83022	0.00465161	0.0287202	NoSig
MAPK8IP2	6009.21	0.736427	0.212708	3.46214	0.000535889	0.00557998	NoSig
MED24	5558.34	0.105867	0.144868	0.730783	0.464912	0.658271	NoSig
RHOBTB2	3074.35	0.439526	0.190201	2.31085	0.0208413	0.0858508	NoSig
HEATR5B	1247.14	0.024736	0.087611	0.282339	0.777684	0.881706	NoSig
SEC62	1849.5	0.219011	0.142319	1.53888	0.123835	0.292389	NoSig
RPS20	101025	-0.133537	0.115482	-1.15635	0.24754	0.450161	NoSig
CSDE1	17731.4	0.217875	0.121677	1.7906	0.0733581	0.205903	NoSig
UBE3C	1837.65	0.0701843	0.111724	0.628195	0.529876	0.709742	NoSig
REV3L	1501.25	-0.576836	0.175332	-3.28996	0.00100203	0.00902483	NoSig
TENM1	6.25459	-1.68013	0.437127	-3.84357	0.000121257	0.00172794	Down
PAX7	2.80205	-0.396047	0.594356	-0.666347	0.505189	0.691608	NoSig
MASP2	21.1707	-0.0200194	0.32739	-0.0611484	0.951241	0.976227	NoSig
IYD	0.299768	0.898053	0.961822	0.9337	0.350459	NA	NoSig
FAM76A	206.273	-0.185878	0.133969	-1.38746	0.165301	0.349015	NoSig
TRAF3IP3	46.613	-1.68648	0.349453	-4.82606	1.39264e-06	4.81603e-05	Down
POMT2	1422.71	0.237515	0.092459	2.56887	0.010203	0.0510664	NoSig
VTA1	934.159	-0.0426426	0.0999102	-0.426809	0.669518	0.813705	NoSig
MLXIPL	17.8522	-0.372386	0.309691	-1.20244	0.229191	0.42825	NoSig
BAZ1B	2936.61	-0.259754	0.0652487	-3.98098	6.86327e-05	0.00111295	NoSig
RANBP9	1707.05	0.458452	0.112085	4.09021	4.30982e-05	0.00076822	NoSig
ETV7	222.684	-1.06615	0.418495	-2.54757	0.0108475	0.0535901	NoSig
SPRTN	263.221	-0.109985	0.121106	-0.908176	0.363785	0.569518	NoSig
EEF1AKNMT	2066.54	0.394185	0.102927	3.82976	0.000128269	0.00180347	NoSig
DYRK4	898.862	-0.0424774	0.0909094	-0.46725	0.640321	0.792882	NoSig
ZNF207	5101.95	0.00462819	0.0665775	0.0695158	0.944579	0.973284	NoSig
UQCRC1	10157.7	0.368065	0.157619	2.33516	0.0195351	0.0819369	NoSig
STARD3NL	1176.45	-0.090558	0.0927973	-0.975869	0.329129	0.536314	NoSig
CD9	772.944	-0.469939	0.205568	-2.28605	0.0222514	0.0895583	NoSig
HHATL	9211.33	0.417359	0.611031	0.683041	0.494581	0.682899	NoSig
NCAPD2	2609.88	0.197312	0.111086	1.77622	0.0756969	0.210653	NoSig
IFFO1	1379.71	-0.308743	0.104643	-2.95044	0.00317326	0.0215343	NoSig
GIPR	19.1131	0.0379814	0.299457	0.126834	0.899072	0.9496	NoSig
PHF7	168.783	0.293226	0.152031	1.92873	0.0537646	0.166203	NoSig
SEMA3G	112.872	-0.147813	0.243069	-0.608111	0.543114	0.720412	NoSig
NISCH	4261.64	0.532719	0.134345	3.96531	7.32998e-05	0.00116789	NoSig
STAB1	1752.2	-0.462727	0.217462	-2.12786	0.033349	0.119096	NoSig
FUZ	1874.02	0.101973	0.148752	0.685521	0.493015	0.681669	NoSig
SLC6A13	23.8538	1.18616	0.531837	2.23031	0.0257265	0.0993828	NoSig
IDS	1961.26	-0.160465	0.112676	-1.42413	0.154408	0.334394	NoSig
PRSS3	1.57282	-0.661964	0.477527	-1.38623	0.165676	0.349376	NoSig
ZNF200	280.289	-0.102078	0.0983213	-1.03821	0.299173	0.506046	NoSig
CD4	1259.61	-0.147794	0.246869	-0.598674	0.54939	0.725029	NoSig
LRRC23	530.862	0.181769	0.154304	1.17799	0.238802	0.439747	NoSig
BTK	115.23	0.426586	0.249728	1.7082	0.0875986	0.232733	NoSig
HFE	203.799	1.27506	0.311819	4.0891	4.3305e-05	0.000770438	Up
SCMH1	3045.44	0.1445	0.125061	1.15543	0.247914	0.450362	NoSig
FYN	3717	0.21365	0.196461	1.08749	0.276818	0.48236	NoSig
HIVEP2	832.128	-0.151862	0.139125	-1.09155	0.275031	0.480594	NoSig
FMO1	6.57305	0.247198	0.373698	0.661491	0.508297	0.694041	NoSig
ELOA	2151.49	-0.128682	0.103253	-1.24627	0.212664	0.409218	NoSig
LYPLA2	5222.47	0.110351	0.169974	0.649226	0.516192	0.700178	NoSig
CLCN6	1850.11	0.154221	0.14072	1.09594	0.273104	0.478479	NoSig
MRC2	1153.09	-0.905641	0.319511	-2.83446	0.00459033	0.0284316	NoSig
NME1-NME2	51.8257	-0.472259	0.24766	-1.90689	0.0565353	0.171875	NoSig
SLC6A7	1.90336	0.00655135	0.491558	0.0133277	0.989366	0.995148	NoSig
TSPAN9	3999.63	0.188492	0.114685	1.64355	0.100269	0.254826	NoSig
BTBD7	992.84	-0.177564	0.0786677	-2.25714	0.0239992	0.0945231	NoSig
APBA3	736.655	-0.00701209	0.112833	-0.0621457	0.950447	0.97607	NoSig
MKS1	756.927	0.398858	0.0963668	4.13896	3.48889e-05	0.000642617	NoSig
ABHD5	180.248	0.455094	0.0912148	4.98926	6.06098e-07	2.48138e-05	NoSig
ANOS1	146.816	-0.63655	0.215108	-2.95922	0.00308419	0.0210656	NoSig
AKAP8L	2157.79	0.172826	0.119723	1.44355	0.148866	0.326884	NoSig
MBTD1	480.097	0.0537409	0.164012	0.327665	0.743165	0.860164	NoSig
UTP18	1628.68	0.0615789	0.0926236	0.664829	0.50616	0.692201	NoSig
RNF216	3302.83	0.038714	0.0781715	0.495245	0.620427	0.778419	NoSig
TTC19	1530.68	-0.187873	0.113787	-1.65109	0.0987202	0.252672	NoSig
PTBP1	14988.9	0.15613	0.117567	1.328	0.184177	0.373656	NoSig
DPF1	30.3107	-0.308254	0.235273	-1.31019	0.19013	0.381634	NoSig
SYT7	465.786	0.508347	0.215812	2.35551	0.0184974	0.0787909	NoSig
LARS2	803.376	0.557753	0.112141	4.97369	6.56911e-07	2.6655e-05	NoSig
PIK3C2A	2513.27	-0.968952	0.263825	-3.6727	0.000239999	0.00297167	NoSig
PLAUR	139.587	-0.133382	0.180811	-0.73769	0.460703	0.654878	NoSig
ANLN	203.235	-0.146447	0.233592	-0.626934	0.530703	0.710361	NoSig
WIZ	3973.52	0.419788	0.13529	3.10288	0.0019165	0.0148196	NoSig
RABGAP1	1672.36	-0.0598865	0.119865	-0.499616	0.617345	0.776294	NoSig
DCN	214.138	0.37332	0.348715	1.07056	0.284367	0.490177	NoSig
QPCTL	1044.21	0.251372	0.117956	2.13108	0.0330829	0.118414	NoSig
PPP5C	3628.09	-0.267686	0.084076	-3.18386	0.00145327	0.0119208	NoSig
CEP68	1318.95	0.294952	0.0762141	3.87005	0.000108813	0.00159039	NoSig
MAP4K3	846.697	-0.187427	0.214258	-0.874773	0.381698	0.585798	NoSig
ZBTB32	9.97122	-0.473328	0.289892	-1.63277	0.102517	0.258358	NoSig
TYROBP	1453.89	-0.713752	0.270922	-2.63453	0.00842532	0.044292	NoSig
TMEM159	887.006	-0.0919518	0.126677	-0.725877	0.467914	0.660705	NoSig
GABRA3	7.23213	0.455349	0.702839	0.647871	0.517068	0.700898	NoSig
BRCA1	241.334	0.494334	0.133037	3.71576	0.000202592	0.00260751	NoSig
ERCC1	4585.71	0.09762	0.15501	0.629766	0.528847	0.708968	NoSig
CD22	269.32	1.78257	0.344034	5.18138	2.20248e-07	1.13744e-05	Up
SEMA3B	1092.26	1.37368	0.282349	4.86519	1.14349e-06	4.07799e-05	Up
MBTPS2	964.151	-0.185127	0.109628	-1.68868	0.0912817	0.239245	NoSig
PRICKLE3	661.651	0.41128	0.142065	2.89501	0.0037915	0.0247074	NoSig
LTF	27.0964	-0.497351	0.337339	-1.47434	0.140391	0.315445	NoSig
EXTL3	4745.48	0.358538	0.161548	2.21939	0.0264601	0.101188	NoSig
NR1H4	1.68319	1.39109	0.507359	2.74183	0.0061098	0.0349235	Up
ELOVL5	2541.53	0.115276	0.141899	0.812374	0.416577	0.617471	NoSig
ALOX5	69.9346	-0.506208	0.269788	-1.87632	0.0606116	0.180445	NoSig
KDM5D	651.023	0.0285712	0.770537	0.0370796	0.970422	0.985681	NoSig
CALCOCO1	4122.63	0.484063	0.135025	3.58499	0.00033709	0.00385977	NoSig
UBR7	1433.02	-0.20766	0.072476	-2.86523	0.00416707	0.0265918	NoSig
MAP4K5	963.677	0.195846	0.15272	1.28238	0.199708	0.39388	NoSig
EHD3	904.616	-0.111738	0.233444	-0.478652	0.632186	0.7869	NoSig
PSMC4	4334.75	-0.154199	0.111064	-1.38838	0.165021	0.34856	NoSig
MAN2B2	3746.5	0.124501	0.105711	1.17775	0.238898	0.439759	NoSig
SLC7A14	3.06295	0.836358	0.652949	1.28089	0.200231	0.394328	NoSig
CLDN11	20.3425	0.361636	0.3269	1.10626	0.268614	0.473763	NoSig
SLC25A39	7785.79	0.183362	0.145002	1.26455	0.206032	0.401409	NoSig
MVP	13192.5	-0.215067	0.163742	-1.31345	0.189031	0.380131	NoSig
NUB1	2053.92	-0.0282881	0.0800549	-0.353359	0.723819	0.84846	NoSig
PGM3	524.698	-0.247499	0.159007	-1.55653	0.119581	0.286035	NoSig
RWDD2A	167.713	-0.353006	0.142416	-2.4787	0.0131861	0.0619583	NoSig
CLK1	2007.51	-0.113484	0.235404	-0.482082	0.629748	0.785224	NoSig
POLR3B	619.83	-0.1125	0.0945495	-1.18985	0.234105	0.434293	NoSig
ANGEL1	1550.75	0.00200295	0.131616	0.0152181	0.987858	0.994387	NoSig
RNF14	2642.07	-0.0477006	0.0913139	-0.52238	0.601405	0.764639	NoSig
DNASE1L1	1112.88	0.0787435	0.103667	0.759583	0.447504	0.644072	NoSig
DDX11	1094.56	0.816199	0.20908	3.90377	9.47074e-05	0.00143312	NoSig
HEBP1	3695.84	-0.13424	0.140644	-0.954464	0.339849	0.546907	NoSig
GPRC5A	358.384	-0.167512	0.313559	-0.534229	0.593183	0.758376	NoSig
MAMLD1	550.991	-0.226976	0.244428	-0.928603	0.353095	0.559536	NoSig
CD6	155.096	-0.776668	0.282248	-2.75173	0.00592819	0.0342691	NoSig
TACC3	840.943	0.248511	0.146357	1.69797	0.0895131	0.235874	NoSig
UFL1	760.224	-0.382147	0.186141	-2.05299	0.0400733	0.135388	NoSig
POLA2	728.136	-0.0666561	0.0890334	-0.748664	0.45406	0.649819	NoSig
ZC3H3	3793.72	0.222058	0.170284	1.30404	0.192219	0.384368	NoSig
CAPN1	11160.4	0.145662	0.166437	0.875178	0.381477	0.58579	NoSig
ACP3	8.14287	-1.29352	0.485385	-2.66493	0.00770045	0.0413139	Down
MDH1	6755.01	-0.210654	0.102766	-2.04983	0.0403805	0.136138	NoSig
SLC30A9	2101.05	-0.0108345	0.133832	-0.0809566	0.935476	0.968334	NoSig
MTMR11	116.648	-0.165601	0.252294	-0.65638	0.511579	0.696592	NoSig
COX15	2045.93	-0.0846183	0.0777731	-1.08802	0.276588	0.482207	NoSig
CCDC88C	541.283	0.241912	0.130347	1.85591	0.0634671	0.186153	NoSig
YAF2	252.62	0.208811	0.143688	1.45323	0.14616	0.323435	NoSig
ZMYND11	2474.12	-0.158767	0.116192	-1.36643	0.171805	0.357621	NoSig
WAS	236.416	-0.622942	0.269648	-2.31021	0.0208768	0.0859454	NoSig
DPEP1	7.68937	-1.24464	0.468672	-2.65568	0.00791482	0.0421175	Down
BID	769.156	-0.244114	0.0896742	-2.72223	0.0064843	0.0365276	NoSig
MATR3	155.931	-0.328093	0.253275	-1.2954	0.195181	0.38856	NoSig
NPC1L1	3.16639	1.14312	0.455784	2.50804	0.0121403	0.0582127	NoSig
XYLT2	2002	-0.0947139	0.0916464	-1.03347	0.301384	0.508649	NoSig
RGPD5	0.296919	-0.484632	0.64725	-0.748756	0.454004	NA	NoSig
STMN4	5.52136	-0.227287	0.734723	-0.30935	0.757055	0.868518	NoSig
NUDCD3	5642.01	0.0735558	0.113472	0.64823	0.516836	0.700739	NoSig
ISL1	2.07755	0.897426	0.690528	1.29962	0.19373	0.386655	NoSig
CHDH	121.553	0.160266	0.267673	0.598736	0.549349	0.725029	NoSig
IL20RA	4.70455	-0.807429	0.516206	-1.56416	0.11778	0.283344	NoSig
CLCA1	0.211356	-0.00566943	1.00581	-0.00563669	0.995503	NA	NoSig
CLCA4	0.106416	-0.00614848	1.18364	-0.00519457	0.995855	NA	NoSig
GLT8D1	1274.91	0.263638	0.0762227	3.45878	0.000542622	0.00564232	NoSig
ATP2C1	2767.32	0.56446	0.104585	5.39712	6.77192e-08	4.4693e-06	NoSig
IGF1	12.0264	-0.771682	0.27777	-2.77813	0.0054673	0.0323351	NoSig
SLC38A5	1786.99	-1.70889	0.498886	-3.42541	0.00061388	0.00619512	Down
RALBP1	2462.26	-0.00794868	0.0743443	-0.106917	0.914855	0.957372	NoSig
RUFY3	691.428	-0.441103	0.175287	-2.51646	0.0118541	0.057211	NoSig
CNTN1	133.285	1.04939	0.436612	2.40349	0.0162393	0.0717277	NoSig
SLC11A1	70.8473	0.282139	0.224104	1.25896	0.208043	0.403805	NoSig
WWTR1	1039.42	-0.33482	0.279112	-1.19959	0.230298	0.429763	NoSig
AGPS	1285.29	0.0703683	0.11733	0.599745	0.548676	0.724505	NoSig
ZNF806	1.07017	0.262084	0.410819	0.637954	0.523503	0.705019	NoSig
CXorf56	1100.08	-0.0634151	0.0741411	-0.85533	0.392369	0.595391	NoSig
ATP1A2	151.258	-0.414055	0.367874	-1.12554	0.260362	0.464595	NoSig
TTC27	848.901	-0.0325803	0.0980682	-0.332221	0.739723	0.858231	NoSig
ZNF582	100.269	0.237562	0.16187	1.4676	0.142212	0.317801	NoSig
VSIG2	2.41309	-0.543769	0.310394	-1.75187	0.0797968	0.218528	NoSig
PHLDB1	7499.76	-0.335972	0.150413	-2.23366	0.0255054	0.0987515	NoSig
MARCO	75.0776	-0.703468	0.426199	-1.65056	0.0988278	0.252806	NoSig
CYP24A1	25.0669	-1.71704	0.493458	-3.47961	0.000502146	0.0052938	Down
PRDM11	1351.73	0.25273	0.125011	2.02166	0.0432113	0.142902	NoSig
SYT13	42.2338	1.18023	0.38603	3.05735	0.00223306	0.0165794	Up
SNAI2	3145.39	0.801737	0.172398	4.65051	3.31116e-06	9.69938e-05	NoSig
CD74	46518.1	-1.15864	0.316724	-3.6582	0.000253993	0.00309458	Down
HGF	46.0782	-0.529917	0.285027	-1.85918	0.063002	0.185248	NoSig
ZRANB1	793.802	-0.118449	0.113641	-1.04232	0.297265	0.503637	NoSig
NCDN	3319.86	-0.152608	0.149657	-1.01972	0.307861	0.515049	NoSig
ADGRA2	1529.38	-0.789369	0.255227	-3.09281	0.00198273	0.0151945	NoSig
CCT8L1P	0.209655	0.22707	0.763363	0.297459	0.766116	NA	NoSig
ZFP64	779.107	0.079444	0.0783407	1.01408	0.310543	0.517804	NoSig
MNAT1	298.227	0.0501603	0.129275	0.388013	0.698006	0.832326	NoSig
SAMD4A	3869.68	-0.610995	0.131067	-4.6617	3.1361e-06	9.28592e-05	NoSig
RUNX3	648.681	1.07545	0.407958	2.63618	0.00838455	0.0441285	Up
MRE11	610.252	-0.175438	0.144705	-1.21239	0.225365	0.423764	NoSig
PLEKHB1	2455.2	-0.61457	0.262189	-2.34399	0.0190785	0.0806243	NoSig
SERPINB1	2438.86	0.157302	0.100538	1.5646	0.117677	0.283121	NoSig
CYP3A43	1.09369	-0.391316	0.499723	-0.783066	0.433588	0.632421	NoSig
SLC7A9	3.43191	-0.872781	0.306487	-2.84769	0.00440373	0.0277095	NoSig
SPAST	545.02	-0.0681358	0.174017	-0.391546	0.695393	0.830747	NoSig
NRXN3	15.933	-0.0363393	0.332958	-0.109141	0.913091	0.956573	NoSig
OSBPL5	1557.65	0.107016	0.141898	0.754178	0.450742	0.646965	NoSig
AQR	1489.04	-0.200742	0.0832582	-2.41107	0.0159057	0.0707783	NoSig
CPS1	502.635	1.5971	0.418263	3.81841	0.000134313	0.00186822	Up
C8B	0.0314865	0.065977	2.9212	0.0225855	0.981981	NA	NoSig
FHL1	1397.58	-0.328002	0.196975	-1.6652	0.0958735	0.247631	NoSig
RTF2	6344.1	0.00991096	0.103828	0.0954559	0.923953	0.962036	NoSig
GABRA1	3.546	0.427848	0.520976	0.821243	0.411508	0.613076	NoSig
NLRP2	106.758	1.6157	0.591415	2.73192	0.00629672	0.0357654	Up
SLC45A4	1391.45	0.0237154	0.12827	0.184887	0.853318	0.925077	NoSig
RNF10	8250.85	0.0540136	0.0831701	0.649435	0.516057	0.700064	NoSig
ZNF839	410.592	0.18349	0.0827287	2.21797	0.0265567	0.101403	NoSig
ZDHHC6	923.618	-0.184825	0.101599	-1.81917	0.0688861	0.196903	NoSig
GRAMD1B	230.887	-0.453375	0.204469	-2.21733	0.0266006	0.101538	NoSig
RNH1	15404.3	0.0432228	0.150357	0.287467	0.773755	0.879388	NoSig
NDUFS1	3231.21	-0.153414	0.135931	-1.12862	0.259058	0.463112	NoSig
RB1CC1	1499.11	-0.346846	0.247099	-1.40367	0.160416	0.342504	NoSig
ERP44	2327.3	-0.232506	0.0973781	-2.38766	0.016956	0.0739031	NoSig
ALAS1	1831.49	0.291127	0.0957353	3.04096	0.00235825	0.0173118	NoSig
BIRC3	85.2081	-1.14991	0.375595	-3.06157	0.00220176	0.0164107	Down
AKAP11	1092.39	-0.287708	0.153226	-1.87767	0.0604264	0.180112	NoSig
GLRX2	207.073	-0.338254	0.128385	-2.63469	0.00842136	0.0442796	NoSig
SNAPC1	172.874	-0.25712	0.1955	-1.31519	0.188446	0.379343	NoSig
DERA	2073.31	0.419226	0.0924729	4.5335	5.8013e-06	0.000151614	NoSig
STRAP	4228.02	-0.111781	0.0705798	-1.58375	0.113251	0.275791	NoSig
ABCC2	97.8706	-0.407009	0.401807	-1.01294	0.311087	0.518265	NoSig
DEF6	462.371	0.34001	0.223126	1.52385	0.127547	0.297589	NoSig
PLEKHO1	781.652	-0.271706	0.247613	-1.0973	0.272509	0.47776	NoSig
GCLM	233.318	-0.383231	0.161513	-2.37276	0.0176558	0.0761733	NoSig
UBR2	1868	0.216589	0.126598	1.71084	0.087111	0.231977	NoSig
EHD2	2729.66	-0.392679	0.228961	-1.71505	0.0863362	0.230451	NoSig
DEPDC1	37.4717	0.156474	0.284502	0.549993	0.582324	0.750272	NoSig
CCDC28A	631.34	0.343151	0.140115	2.44907	0.0143225	0.0657743	NoSig
RRAGD	4143.24	-0.0987256	0.132061	-0.747575	0.454717	0.650382	NoSig
HSF2	403.754	0.021526	0.13953	0.154275	0.877393	0.939064	NoSig
PHF20	1822.56	-0.112648	0.0791033	-1.42406	0.15443	0.334415	NoSig
HSD17B6	15.7245	0.429611	0.222448	1.93129	0.0534475	0.165428	NoSig
NR1H3	1337.96	0.051624	0.176461	0.292552	0.769864	0.877333	NoSig
TYMP	1678.72	-0.805685	0.27064	-2.97696	0.00291117	0.0202371	NoSig
NCAPH2	3091.72	0.218795	0.158236	1.38272	0.166752	0.350727	NoSig
TOMM34	2200.81	0.106366	0.101466	1.04829	0.294504	0.500663	NoSig
SEC63	3230.52	-0.402075	0.132233	-3.04066	0.0023606	0.0173197	NoSig
KPNA6	2182.65	-0.0886673	0.109662	-0.808553	0.418772	0.619351	NoSig
VIM	325700	0.436173	0.211271	2.06452	0.0389689	0.132801	NoSig
RTEL1-TNFRSF6B	68.3053	-0.0478099	0.193208	-0.247453	0.804558	0.898037	NoSig
FAS	334.712	-1.03435	0.254823	-4.0591	4.9263e-05	0.000852885	Down
RNASET2	1273.84	-0.438346	0.146293	-2.99636	0.00273219	0.0193464	NoSig
CD44	135879	0.248366	0.109114	2.27621	0.0228336	0.0911648	NoSig
KCNG1	395.377	0.00453331	0.163324	0.0277565	0.977856	0.989483	NoSig
AGPAT4	170.39	-0.983233	0.293757	-3.34709	0.00081664	0.00770919	NoSig
SLAMF7	387.689	-0.421568	0.479184	-0.879762	0.378988	0.583358	NoSig
BTN3A1	1717.84	-0.557475	0.259633	-2.14717	0.0317798	0.115162	NoSig
MIPEP	1034.17	0.237807	0.0838245	2.83696	0.00455449	0.0282672	NoSig
PRKCH	1600.44	0.162704	0.175117	0.929116	0.352829	0.559335	NoSig
INSRR	2.89747	0.437695	0.483155	0.90591	0.364984	0.570742	NoSig
IFNGR1	939.386	-0.557255	0.17026	-3.27295	0.0010643	0.00941829	NoSig
B4GALT7	1983.02	0.131357	0.108502	1.21065	0.226031	0.424577	NoSig
SH2D2A	135.432	-0.121862	0.227318	-0.536087	0.591898	0.75783	NoSig
VRK2	334.033	-0.217104	0.172378	-1.25947	0.207862	0.40354	NoSig
TNFRSF1B	889.272	-0.920877	0.249502	-3.69086	0.000223495	0.00280536	NoSig
VEZT	624.715	0.017877	0.165632	0.107932	0.91405	0.956864	NoSig
POU2F2	41.177	-0.923001	0.239371	-3.85595	0.000115281	0.00166356	NoSig
BRD9	1608.71	-0.262774	0.110188	-2.38477	0.0170896	0.0743232	NoSig
SNX1	4724.54	-0.323484	0.0857647	-3.77176	0.000162101	0.00217625	NoSig
TBPL1	238.589	-0.0473431	0.134365	-0.352348	0.724577	0.849056	NoSig
ARNTL2	9.11363	-0.725724	0.387087	-1.87483	0.0608159	0.180919	NoSig
BCLAF1	2583.06	-0.178391	0.124756	-1.42992	0.15274	0.331884	NoSig
SLC39A9	3139.72	-0.29377	0.088776	-3.30912	0.000935911	0.00853033	NoSig
ANK1	35.211	-1.02768	0.329869	-3.11541	0.00183689	0.0143502	Down
IBSP	3.34241	-1.19233	0.751183	-1.58727	0.112452	0.274311	NoSig
TFB1M	426.993	-0.148239	0.133251	-1.11248	0.265932	0.47073	NoSig
RABEP1	2478	-0.196564	0.120639	-1.62936	0.103237	0.259384	NoSig
HMGB3	644.24	0.0645238	0.170249	0.378997	0.70469	0.8364	NoSig
NUP160	1565.77	-0.0649383	0.118662	-0.547255	0.584204	0.751597	NoSig
BAK1	1281.64	0.494128	0.135948	3.63467	0.000278333	0.00332169	NoSig
MUSK	0.217767	0.361071	1.23263	0.292927	0.769578	NA	NoSig
IKZF2	63.5806	-0.0522143	0.273388	-0.19099	0.848534	0.922498	NoSig
GRN	31215.1	0.143935	0.188909	0.761929	0.446102	0.642917	NoSig
FAM13B	1234.27	-0.220692	0.142393	-1.54988	0.121171	0.288497	NoSig
ARHGAP31	895.479	0.575317	0.173142	3.3228	0.00089119	0.00820464	NoSig
CENPQ	106.765	0.236257	0.211726	1.11586	0.264481	0.469345	NoSig
SARS1	7723.93	-0.0864768	0.111419	-0.776138	0.437667	0.635454	NoSig
RANBP3	4866.01	0.0275726	0.122305	0.225441	0.821636	0.907209	NoSig
ARID4A	412.389	-0.20612	0.214255	-0.962032	0.336033	0.543243	NoSig
EIPR1	1292.37	0.166635	0.0906752	1.83772	0.0661042	0.191307	NoSig
PNPLA6	5006.31	-0.107505	0.154359	-0.69646	0.486141	0.675894	NoSig
IFT88	564.166	-0.217312	0.161808	-1.34303	0.179264	0.367229	NoSig
ALG1	1715.53	-0.249467	0.143662	-1.73648	0.0824784	0.223619	NoSig
ZCCHC8	685.035	0.0717203	0.0951416	0.753827	0.450953	0.647199	NoSig
ABCF2	3537.79	0.0169148	0.0933009	0.181293	0.856137	0.926718	NoSig
CHPF2	2673.77	-0.149656	0.126591	-1.1822	0.237125	0.43779	NoSig
LRRC7	8.4675	-0.660427	0.296748	-2.22555	0.0260442	0.10013	NoSig
FUT8	394.206	-0.419545	0.155496	-2.6981	0.00697357	0.0385389	NoSig
UBA6	705.693	-0.178285	0.180858	-0.985774	0.324244	0.531646	NoSig
GAB2	5844.31	0.0362072	0.160506	0.225581	0.821527	0.907209	NoSig
ATP6V0A1	12600.4	0.35394	0.166471	2.12614	0.0334918	0.119425	NoSig
PIAS1	643.504	-0.0970388	0.0996625	-0.973674	0.330218	0.537498	NoSig
SLC4A7	312.065	0.251309	0.246531	1.01938	0.308021	0.515168	NoSig
APBA2	1837.32	-0.0340688	0.163886	-0.207881	0.835322	0.915257	NoSig
MAP2K3	2502.81	0.0419065	0.13752	0.304729	0.760572	0.870702	NoSig
EFCAB1	251.384	1.82524	0.517019	3.53032	0.000415059	0.00455378	Up
TMSB10	29476.9	0.0511659	0.143559	0.356409	0.721534	0.847094	NoSig
ASTE1	211.765	0.451687	0.111678	4.04453	5.24285e-05	0.000892693	NoSig
RNF19A	920.229	-0.400509	0.208926	-1.91699	0.0552394	0.169216	NoSig
PEX3	208.843	-0.364937	0.182482	-1.99985	0.0455164	0.148252	NoSig
GABARAPL2	2858.09	-0.000918581	0.0961595	-0.00955268	0.992378	0.996672	NoSig
MYOC	12.2421	1.12433	0.643812	1.74637	0.0807473	0.220431	NoSig
SH3YL1	593.201	0.0910596	0.157953	0.576497	0.564279	0.736937	NoSig
FAM136A	1502.29	0.138078	0.0833162	1.65728	0.0974633	0.250556	NoSig
VCL	2554.66	0.0790701	0.0929408	0.850758	0.394904	0.598132	NoSig
DEPDC1B	50.3729	-0.226449	0.243622	-0.929507	0.352627	0.559144	NoSig
DAPK2	54.6581	-0.622998	0.206132	-3.02232	0.00250847	0.0180849	NoSig
NSMAF	2515.95	-0.504023	0.152624	-3.30238	0.000958675	0.00870596	NoSig
ADSS2	1203.16	0.468967	0.128179	3.65869	0.000253512	0.00309458	NoSig
STAP1	2.35064	-1.24798	0.554473	-2.25075	0.0244014	0.0957217	NoSig
TIMP2	55994	0.0913584	0.165308	0.552654	0.5805	0.748697	NoSig
RFC1	2272.86	0.13881	0.120302	1.15384	0.248565	0.451097	NoSig
TBC1D23	481.053	0.296623	0.166927	1.77696	0.0755753	0.210495	NoSig
CUL3	1492.78	-0.0232366	0.139562	-0.166496	0.867766	0.93355	NoSig
MYOM2	191.785	-0.419022	0.206983	-2.02442	0.0429266	0.142184	NoSig
OTC	0.214492	-0.153102	1.16273	-0.131675	0.895241	NA	NoSig
CYP46A1	31.2967	-0.0237432	0.303344	-0.0782716	0.937612	0.969249	NoSig
AC118549.1	1732.88	0.346811	0.143765	2.41235	0.0158502	0.0706345	NoSig
SLC18A1	0.435675	0.279134	0.62049	0.449861	0.652811	NA	NoSig
USP2	288.893	0.199629	0.201113	0.992622	0.320894	0.528341	NoSig
CASR	0.921605	0.774675	0.866328	0.894206	0.371212	0.576204	NoSig
TUBG2	929.656	-0.0634589	0.13211	-0.480349	0.630979	0.786076	NoSig
RPL26L1	687.862	-0.282068	0.0957188	-2.94684	0.00321034	0.0217344	NoSig
FLT4	288.715	-0.0819657	0.173067	-0.473608	0.63578	0.789435	NoSig
NSUN2	2597.57	-0.103408	0.0645922	-1.60093	0.109392	0.269171	NoSig
FBXO42	1118.85	0.0533976	0.0979562	0.545117	0.585673	0.752773	NoSig
MFAP3	304.642	-0.220119	0.152825	-1.44033	0.149773	0.328194	NoSig
MRI1	494.398	-0.0325595	0.123666	-0.263286	0.79233	0.891469	NoSig
METTL1	1220.74	0.236069	0.129073	1.82895	0.0674066	0.193806	NoSig
HOXC8	0.971429	1.39533	0.868623	1.60637	0.108192	0.267152	NoSig
AGA	863.252	-0.140383	0.114202	-1.22925	0.218977	0.416903	NoSig
PI4K2B	147.416	-0.450286	0.208572	-2.1589	0.0308583	0.112735	NoSig
BOD1L1	1339.03	-0.014688	0.149286	-0.0983887	0.921624	0.961064	NoSig
MAT2B	2167.49	0.249677	0.113799	2.19402	0.0282341	0.105859	NoSig
TLL1	7.09972	-0.796061	0.310113	-2.567	0.0102581	0.0512888	NoSig
EDC4	2132.59	0.0923284	0.131506	0.702083	0.482627	0.673186	NoSig
TRIO	2484.48	-0.511946	0.123502	-4.14525	3.39445e-05	0.000629398	NoSig
VCAN	151.886	-0.047267	0.342965	-0.137819	0.890384	0.946028	NoSig
CLEC16A	2038.93	0.233871	0.109887	2.12829	0.033313	0.11901	NoSig
MSR1	167.909	-0.511594	0.277146	-1.84593	0.0649017	0.188804	NoSig
CDH1	21176.9	-1.43661	0.253745	-5.66162	1.49953e-08	1.32914e-06	Down
MTREX	1663.34	-0.276189	0.138969	-1.98741	0.0468765	0.151511	NoSig
DNAH5	11.3086	0.0825786	0.272815	0.30269	0.762126	0.871815	NoSig
ZFYVE16	1659.38	0.175473	0.210069	0.835309	0.403544	0.605725	NoSig
RIPOR1	5806.65	0.10357	0.160355	0.645877	0.518359	0.701636	NoSig
C6	0.984917	-0.00410111	0.555003	-0.00738934	0.994104	0.9974	NoSig
RAI14	2358.7	-0.482052	0.118481	-4.0686	4.72974e-05	0.000826694	NoSig
SOX30	8.97323	-0.128767	0.251012	-0.51299	0.607959	0.769757	NoSig
PNKP	2326.32	-0.23944	0.165562	-1.44622	0.148116	0.325921	NoSig
BEST2	1.78605	-1.14464	1.06592	-1.07386	0.282887	0.488483	NoSig
PHLPP2	141.865	-0.586651	0.20514	-2.85976	0.00423964	0.0269732	NoSig
SPDL1	213.317	0.245505	0.155057	1.58332	0.113349	0.275956	NoSig
STAU2	965.819	-0.285249	0.161561	-1.76557	0.0774673	0.214214	NoSig
SLC66A1	1433.18	-0.0695044	0.159031	-0.437049	0.662076	0.808165	NoSig
CTNS	2697.96	-0.00523177	0.147179	-0.0355471	0.971644	0.986336	NoSig
RTN4R	494.876	0.0176199	0.158495	0.11117	0.911482	0.955874	NoSig
PHF23	3725.22	0.27033	0.111522	2.42401	0.01535	0.0690575	NoSig
CDH10	1.44954	0.364232	0.465688	0.782138	0.434134	0.632589	NoSig
INPP4A	864.679	-0.275007	0.128729	-2.13633	0.0326529	0.117244	NoSig
RAB27B	3.43452	-0.561801	0.446344	-1.25867	0.208148	0.403917	NoSig
PSMA4	2242.73	-0.354593	0.142025	-2.4967	0.0125355	0.0595963	NoSig
MYO16	20.1195	0.188377	0.192245	0.979882	0.327144	0.534584	NoSig
LSG1	1218.26	0.448092	0.0849123	5.27711	1.31236e-07	7.5672e-06	NoSig
PARP3	845.787	0.372148	0.132792	2.80249	0.00507105	0.0305793	NoSig
TNC	231.73	-0.431872	0.336326	-1.28409	0.199111	0.393161	NoSig
THAP3	915.405	0.215555	0.137572	1.56685	0.117149	0.282254	NoSig
RIPOR3	16.364	-0.471841	0.250207	-1.8858	0.0593216	0.17785	NoSig
TDP1	571.263	0.127918	0.0820733	1.55858	0.119096	0.285333	NoSig
AIFM2	2225	-0.457713	0.11073	-4.1336	3.57119e-05	0.000655261	NoSig
C2orf83	0.0257009	-0.078291	2.9212	-0.0268009	0.978619	NA	NoSig
SPATA7	313.355	-0.0901326	0.142162	-0.634014	0.526072	0.707191	NoSig
MED17	754.607	-0.0379235	0.103276	-0.367205	0.713466	0.841968	NoSig
RETSAT	4763.32	0.0854044	0.105945	0.806119	0.420174	0.62071	NoSig
CAPG	1188.53	0.0561887	0.344279	0.163207	0.870356	0.93483	NoSig
AP2S1	5000.63	-0.0654538	0.158867	-0.412005	0.680336	0.820457	NoSig
USH2A	8.06564	0.387215	0.288433	1.34248	0.17944	0.367509	NoSig
ZPBP	1.08385	0.826823	0.696164	1.18768	0.234958	0.435227	NoSig
TG	44.6152	1.02765	0.283044	3.63069	0.00028266	0.00336453	Up
ADAM28	50.2145	-0.749449	0.319022	-2.34921	0.0188133	0.0798507	NoSig
BARX2	0.898571	-0.802472	0.626004	-1.2819	0.199879	0.394013	NoSig
DCUN1D1	282.276	0.303382	0.155272	1.95387	0.0507165	0.159723	NoSig
JADE2	3693.71	0.0282086	0.108918	0.258989	0.795644	0.892888	NoSig
ZIC2	6.10745	-0.865066	0.607305	-1.42443	0.154321	0.334268	NoSig
LCP2	279.267	-0.831135	0.292029	-2.84606	0.00442633	0.0277802	NoSig
TRIT1	1089	-0.167829	0.128877	-1.30224	0.192833	0.38523	NoSig
ADRB1	3.75431	-0.805282	0.435571	-1.8488	0.0644874	0.187918	NoSig
GUCA2B	0	NA	NA	NA	NA	NA	NA
CUL7	6500.81	0.787508	0.170294	4.6244	3.75691e-06	0.000107521	NoSig
CTNNA1	16096.9	0.0188653	0.0715936	0.263505	0.792161	0.891463	NoSig
PHKA2	1510.63	0.346464	0.126182	2.74575	0.0060372	0.0347288	NoSig
CNTLN	270.096	-0.406348	0.165883	-2.4496	0.0143013	0.0656992	NoSig
EPHA3	7.16624	0.375797	0.40254	0.933564	0.350529	0.55701	NoSig
HSPA5	15420.6	-0.144106	0.128281	-1.12336	0.261285	0.465786	NoSig
DSG2	702.783	0.430799	0.282504	1.52493	0.127276	0.297158	NoSig
GEMIN8	1078.02	-0.0517612	0.118927	-0.435234	0.663392	0.809194	NoSig
OFD1	527.503	0.0398866	0.186125	0.2143	0.830313	0.912066	NoSig
GPM6B	9247.86	-0.631075	0.178841	-3.5287	0.000417612	0.00457478	NoSig
MAGEC2	0.0292728	0.138111	2.9212	0.0472787	0.962291	NA	NoSig
PREX2	29.6566	-0.721876	0.258049	-2.79744	0.005151	0.0309591	NoSig
WDR37	1049.15	0.0822976	0.0930842	0.88412	0.376632	0.581453	NoSig
YTHDC2	785.391	-0.326948	0.159772	-2.04634	0.0407228	0.137005	NoSig
CTPS2	942.862	0.0589009	0.0847627	0.694892	0.487123	0.676666	NoSig
ATP6V1H	3892.42	-0.287624	0.148209	-1.94067	0.0522988	0.163126	NoSig
POLR2B	2650.39	-0.127584	0.114487	-1.1144	0.265109	0.469951	NoSig
FAM214A	455.167	-0.2588	0.179934	-1.4383	0.150348	0.32894	NoSig
ARAP2	159.336	0.676207	0.349457	1.93502	0.0529874	0.164543	NoSig
TPR	2507.61	-0.392528	0.19949	-1.96765	0.049108	0.156325	NoSig
CP	586.82	-1.68353	0.497151	-3.38636	0.000708253	0.00690578	Down
KIAA0556	1310.94	0.0230043	0.0875369	0.262796	0.792708	0.891569	NoSig
DTNBP1	1389.76	0.49334	0.101638	4.85388	1.21071e-06	4.2754e-05	NoSig
XK	14.8125	-0.678121	0.304114	-2.22983	0.025759	0.0994522	NoSig
ANO2	46.342	-0.146407	0.303242	-0.482807	0.629233	0.785132	NoSig
C12orf4	354.38	-0.372046	0.160732	-2.3147	0.0206294	0.0852086	NoSig
SCML1	272.419	-0.630199	0.280187	-2.24921	0.0244991	0.0959812	NoSig
WWC3	3603.73	-0.325049	0.10968	-2.96361	0.00304053	0.0209029	NoSig
ARHGAP6	30.4513	-0.64966	0.204206	-3.1814	0.00146566	0.0119937	NoSig
FAM184B	153.275	0.986849	0.21294	4.63439	3.57985e-06	0.000103427	NoSig
MAP4	23475.6	0.584087	0.154697	3.77568	0.000159573	0.00214664	NoSig
GOPC	973.423	-0.200717	0.163641	-1.22656	0.219986	0.417866	NoSig
ROS1	0.0864064	0.426655	1.96279	0.217371	0.827919	NA	NoSig
USP28	579.344	-0.137581	0.152498	-0.902184	0.366959	0.572547	NoSig
HDAC9	190.398	0.258986	0.298275	0.868281	0.38524	0.589066	NoSig
TSPAN17	2045.21	-0.0936462	0.130719	-0.716395	0.473747	0.665818	NoSig
NOP16	962.566	0.0674134	0.11191	0.602391	0.546914	0.72299	NoSig
CC2D2A	1269.97	-0.163532	0.104048	-1.5717	0.11602	0.280391	NoSig
RRM2B	1816.07	-1.00996	0.227471	-4.43995	8.99789e-06	0.000215422	Down
ZNF800	435.181	-0.343572	0.123278	-2.78696	0.00532043	0.0316785	NoSig
TNFRSF17	1.22395	-0.894801	0.770075	-1.16197	0.245249	0.447541	NoSig
SNX29	1224.31	0.478314	0.114597	4.17388	2.99451e-05	0.000570351	NoSig
LMO3	130.74	1.43039	0.248353	5.75949	8.43678e-09	8.52675e-07	Up
MRPS10	1642.4	0.314149	0.0929869	3.37842	0.000729028	0.00706309	NoSig
GUCA1A	19.0226	-1.32594	0.612024	-2.16649	0.0302738	0.111283	NoSig
RSF1	1067.11	-0.0438353	0.130446	-0.336041	0.73684	0.856411	NoSig
VPS13D	2020.2	-0.297111	0.111057	-2.6753	0.00746621	0.0404694	NoSig
CELF2	1280.34	-1.58985	0.329975	-4.8181	1.44932e-06	4.97438e-05	Down
FAM120A	7101.98	-0.107418	0.0801119	-1.34085	0.17997	0.368023	NoSig
R3HDM1	691.682	-0.255076	0.100547	-2.53687	0.0111849	0.054792	NoSig
COL9A2	389.525	-0.60931	0.395073	-1.54227	0.123008	0.291129	NoSig
KITLG	80.7918	0.589766	0.313269	1.88262	0.059752	0.178779	NoSig
ERCC8	219.937	-0.266628	0.11097	-2.4027	0.0162746	0.0718594	NoSig
ADAMTS6	8.55681	-0.387563	0.32787	-1.18206	0.237182	0.437836	NoSig
H6PD	4579.37	0.105689	0.109658	0.963811	0.335141	0.542317	NoSig
VAMP3	4803.91	0.157085	0.136795	1.14833	0.250833	0.4535	NoSig
PER3	745.69	0.0783348	0.173982	0.450247	0.652533	0.801481	NoSig
UTS2	1.30469	-0.349148	0.663236	-0.526431	0.598589	0.762427	NoSig
TNFRSF9	55.015	-1.17477	0.669375	-1.75502	0.0792557	0.217695	NoSig
EPN3	11.8258	-0.336428	0.34087	-0.986969	0.323658	0.530937	NoSig
LTBP1	866.287	1.19717	0.217691	5.49943	3.81023e-08	2.82814e-06	Up
RCN1	3912.88	0.242039	0.100296	2.41324	0.0158115	0.0705055	NoSig
ELN	258.179	-0.245437	0.281706	-0.871251	0.383617	0.587469	NoSig
RFC2	1148.27	-0.199564	0.0881429	-2.2641	0.0235681	0.0932814	NoSig
ARID1B	5614.19	-0.273205	0.122546	-2.22941	0.0257866	0.0995308	NoSig
CLPTM1L	5650.97	0.103231	0.113888	0.906425	0.364711	0.570413	NoSig
NEDD4L	8350.5	0.127647	0.0843059	1.5141	0.130001	0.300868	NoSig
FOXP3	58.8601	-0.634193	0.260876	-2.43102	0.0150566	0.0681064	NoSig
PPP1R3F	382.972	-0.094568	0.151493	-0.62424	0.53247	0.711486	NoSig
HEXB	7269.8	-0.609614	0.104261	-5.847	5.00518e-09	5.61832e-07	NoSig
PTCD2	430.09	-0.0502689	0.108776	-0.462134	0.643985	0.795168	NoSig
NEXMIF	14.8156	-0.416961	0.341548	-1.2208	0.222163	0.41999	NoSig
JKAMP	1267.26	-0.434345	0.124412	-3.49117	0.00048091	0.00510925	NoSig
DKK3	822.258	-0.837569	0.367832	-2.27704	0.0227836	0.0910714	NoSig
ARHGEF5	402.31	0.888748	0.212447	4.18339	2.8719e-05	0.000550445	NoSig
NFE2L3	189.779	0.164653	0.220164	0.747864	0.454542	0.650238	NoSig
MCUR1	1455.96	0.484322	0.076944	6.29447	3.08462e-10	5.35725e-08	NoSig
LIMA1	1548.04	-0.628362	0.175924	-3.57178	0.000354566	0.00401455	NoSig
LETMD1	6821.62	0.218309	0.153504	1.42217	0.154975	0.335093	NoSig
SLC4A8	23.1618	-0.695157	0.343085	-2.0262	0.0427447	0.141752	NoSig
LAMC3	2553.05	-0.11395	0.246905	-0.461514	0.64443	0.795403	NoSig
PTGER3	14.8287	0.0230723	0.292466	0.078889	0.937121	0.968961	NoSig
TNIP3	3.65211	-1.65447	0.606291	-2.72884	0.00635581	0.0359668	Down
MAPK9	1113.63	-0.12421	0.08121	-1.52949	0.126143	0.295368	NoSig
COL23A1	222.027	0.249462	0.30728	0.811839	0.416884	0.61765	NoSig
BCAR1	3145.01	-0.112286	0.138316	-0.81181	0.416901	0.61765	NoSig
FAM160A2	1358.7	0.0943778	0.0752016	1.255	0.20948	0.405445	NoSig
HERPUD1	2458.4	-0.0649025	0.0885547	-0.732908	0.463614	0.657379	NoSig
HOMER3	2421.63	0.116617	0.176778	0.659682	0.509458	0.695036	NoSig
RAD51	118.25	0.0660189	0.160592	0.411098	0.681001	0.820875	NoSig
POLQ	30.404	0.207197	0.217784	0.951388	0.341408	0.548049	NoSig
PIK3CB	2094.06	0.332388	0.110402	3.0107	0.00260645	0.0186392	NoSig
CYBA	8583.85	-0.419017	0.203956	-2.05445	0.0399319	0.134974	NoSig
THOC3	271.646	-0.051962	0.12763	-0.407131	0.683912	0.823044	NoSig
HEBP2	964.817	0.0827388	0.167033	0.495345	0.620357	0.778419	NoSig
MPHOSPH9	288.941	-0.482021	0.216876	-2.22257	0.0262451	0.100634	NoSig
PLEKHA5	3738.56	0.0379867	0.156052	0.243424	0.807677	0.899722	NoSig
PRSS8	17.8069	2.2637	0.43725	5.17712	2.25337e-07	1.1499e-05	Up
SIKE1	494.496	-0.127613	0.164284	-0.776783	0.437287	0.635141	NoSig
RRP12	2956.91	0.38937	0.134129	2.90295	0.0036967	0.0242165	NoSig
FNIP2	3162.14	-0.568037	0.153752	-3.6945	0.00022032	0.00277697	NoSig
MSMO1	353.63	0.0767329	0.14781	0.519132	0.603669	0.766415	NoSig
TTC17	2700.97	-0.0307884	0.0750851	-0.410047	0.681771	0.821334	NoSig
ALX4	17.6379	1.41194	0.399267	3.53633	0.000405729	0.00446824	Up
FSTL4	315.048	-1.13846	0.259298	-4.39053	1.13077e-05	0.000259169	Down
FOXN3	2574.89	-0.148049	0.0954431	-1.55118	0.12086	0.287896	NoSig
METTL24	3.82638	-0.306281	0.361348	-0.847606	0.396658	0.599628	NoSig
AKR7A2	2933.97	0.0818005	0.167449	0.488509	0.625189	0.782315	NoSig
MRTO4	2332.36	0.035572	0.107393	0.331232	0.740469	0.858396	NoSig
NNAT	25.4103	-0.135277	0.375553	-0.360209	0.718691	0.845081	NoSig
USE1	2512.65	-0.139431	0.1632	-0.854359	0.392906	0.595963	NoSig
MCF2L2	13.563	-0.345868	0.277058	-1.24836	0.211898	0.408336	NoSig
NRIP2	223.14	-0.535498	0.152307	-3.5159	0.00043826	0.00474634	NoSig
LAMA3	42.099	-0.276889	0.21943	-1.26186	0.207	0.402607	NoSig
AP5M1	975.221	-0.162605	0.119741	-1.35797	0.174473	0.361052	NoSig
ANAPC4	696.888	-0.200309	0.160949	-1.24455	0.213298	0.409908	NoSig
KCNQ1	673.641	-0.207144	0.174775	-1.1852	0.235937	0.436451	NoSig
TRAPPC3	2850.5	-0.0029372	0.111624	-0.0263133	0.979007	0.990069	NoSig
THRAP3	7528.67	0.082689	0.0979109	0.844533	0.398372	0.600793	NoSig
PHPT1	6151.01	-0.205088	0.138199	-1.48401	0.137808	0.311971	NoSig
ENTPD2	37.7992	0.0226963	0.322405	0.070397	0.943878	0.973059	NoSig
LY75	37.4758	-1.11935	0.392755	-2.84999	0.00437211	0.0275853	Down
ARID4B	533.279	-0.132106	0.20589	-0.641632	0.521112	0.703666	NoSig
OPN3	147.139	-0.396855	0.176579	-2.24746	0.0246106	0.0962944	NoSig
SDCCAG8	575.107	-0.0056873	0.127107	-0.0447443	0.964311	0.982837	NoSig
PTPRN	26.1134	-1.19585	0.410294	-2.91462	0.00356124	0.0235203	Down
HHAT	667.252	0.167819	0.123501	1.35886	0.174192	0.360725	NoSig
KIF1B	2682.98	-0.474736	0.120398	-3.94306	8.04498e-05	0.00125624	NoSig
FOXC1	169.388	-0.514981	0.217918	-2.36319	0.0181184	0.0774775	NoSig
TBC1D22A	3271.17	0.13801	0.133055	1.03724	0.299623	0.506628	NoSig
SYNE2	5114.43	-0.542233	0.250719	-2.16271	0.0305632	0.111986	NoSig
PLEKHH1	8074.01	-0.15613	0.138977	-1.12342	0.261259	0.465771	NoSig
ATP9A	3608.16	-0.578397	0.118252	-4.89124	1.00202e-06	3.6838e-05	NoSig
SPO11	0.0196263	0.282379	2.9212	0.0966652	0.922992	NA	NoSig
CBLN4	2.93755	-0.642448	0.621232	-1.03415	0.301065	0.50844	NoSig
CHRDL2	3.77474	0.324098	0.490099	0.661291	0.508426	0.694181	NoSig
FAM168A	3091.54	-0.14358	0.0850099	-1.68898	0.0912241	0.23914	NoSig
RELT	331.974	-0.478401	0.134991	-3.54396	0.000394171	0.00437083	NoSig
GALC	981.518	0.101803	0.153445	0.663449	0.507043	0.692915	NoSig
NOP58	1272.52	-0.270115	0.190758	-1.41601	0.156772	0.337539	NoSig
SZRD1	8113.93	0.0263012	0.118432	0.222079	0.824253	0.908469	NoSig
KCNH2	24.8018	-0.281045	0.378198	-0.743118	0.45741	0.652535	NoSig
CUL1	2104.49	-0.304356	0.12064	-2.52285	0.011641	0.0564237	NoSig
FAM114A2	774.317	-0.113952	0.0988548	-1.15272	0.249025	0.451513	NoSig
CYFIP2	736.26	-0.727939	0.272591	-2.67044	0.00757509	0.0408414	NoSig
TAB2	1536.23	-0.147322	0.151178	-0.974491	0.329813	0.536958	NoSig
GINM1	1011.98	-0.386947	0.128874	-3.00253	0.00267748	0.0190576	NoSig
EIF2AK2	1618.71	0.00652991	0.135973	0.0480235	0.961698	0.981954	NoSig
USP36	3416.45	0.44492	0.116633	3.81469	0.000136353	0.00189284	NoSig
KMT2C	2024.05	-0.223225	0.100753	-2.21557	0.0267211	0.101832	NoSig
MCOLN3	210.087	0.323784	0.267151	1.21199	0.225518	0.423989	NoSig
CCDC85A	9.72874	-0.432598	0.319686	-1.3532	0.175993	0.363082	NoSig
PUM2	4410.29	0.21016	0.11698	1.79655	0.0724076	0.20382	NoSig
MRPL43	2579.7	0.345829	0.0877807	3.93969	8.15871e-05	0.0012677	NoSig
ITIH4	4.49095	0.175796	0.314149	0.559593	0.575757	0.745282	NoSig
ITIH1	0.67352	0.305667	0.584129	0.523288	0.600774	0.764149	NoSig
HPF1	433.461	-0.120977	0.1087	-1.11295	0.265731	0.470618	NoSig
ZFR	2333.69	-0.0767735	0.165974	-0.462564	0.643677	0.795053	NoSig
ZNF280C	138.183	0.0520598	0.15096	0.344859	0.7302	0.852737	NoSig
NPFFR2	0.861937	-0.398445	0.556434	-0.716069	0.473949	0.665994	NoSig
PHF21B	23.4542	0.769818	0.365403	2.10676	0.0351381	0.123582	NoSig
TRAF1	524.497	-0.515232	0.157549	-3.27029	0.00107437	0.00948615	NoSig
RC3H2	1301.52	-0.0847287	0.120428	-0.703561	0.481706	0.67257	NoSig
IL17RB	82.3062	0.28278	0.140501	2.01265	0.0441516	0.145033	NoSig
TRAF3IP2	4057.23	-0.0918434	0.147615	-0.622182	0.533822	0.712599	NoSig
GYG2	11307.4	0.928173	0.181234	5.1214	3.03273e-07	1.4346e-05	NoSig
DCBLD2	1066.79	0.400525	0.14518	2.75883	0.0058009	0.0337327	NoSig
SERPINB3	0.156653	0.285997	2.11271	0.13537	0.89232	NA	NoSig
SOAT1	2087.07	-0.728157	0.208609	-3.49053	0.000482063	0.00511952	NoSig
PKP2	62.6956	0.253749	0.261756	0.969409	0.332341	0.539663	NoSig
MSH4	9.94505	0.999123	0.375102	2.6636	0.00773096	0.0414289	NoSig
F7	1102.3	-0.482305	0.247868	-1.94581	0.0516771	0.161758	NoSig
GDI2	10618.2	-0.207178	0.082423	-2.51359	0.011951	0.0576277	NoSig
PRDM1	78.2643	-0.507489	0.279032	-1.81875	0.0689497	0.197002	NoSig
ATG5	498.422	-0.203358	0.155135	-1.31085	0.189909	0.381419	NoSig
TMCC3	181.354	-0.00202488	0.216232	-0.00936436	0.992528	0.996786	NoSig
PITHD1	2488.09	0.167887	0.111494	1.5058	0.132119	0.303906	NoSig
MTA3	2288.7	0.194646	0.0821046	2.37071	0.017754	0.0763839	NoSig
USP13	628.912	0.319249	0.125912	2.53548	0.0112292	0.054926	NoSig
ATP11B	714.298	0.271635	0.16008	1.69686	0.0897226	0.23629	NoSig
LAMC2	7.9551	-0.205849	0.454354	-0.45306	0.650506	0.799888	NoSig
CDK14	255.126	-0.876852	0.257354	-3.40719	0.000656355	0.00653468	NoSig
SEC61A1	12270.4	0.370325	0.109549	3.38046	0.000723656	0.00702845	NoSig
PPP1R12A	902.172	-0.306316	0.204395	-1.49865	0.133965	0.306457	NoSig
RASGRF1	92.6997	-1.57916	0.371911	-4.24608	2.17544e-05	0.000444982	Down
CAMK2B	74.8004	0.562002	0.290071	1.93746	0.0526891	0.163919	NoSig
CROCC	1920.27	-0.205956	0.140761	-1.46316	0.143423	0.319512	NoSig
POLR3E	1577.36	0.0274453	0.0538242	0.509906	0.610117	0.771007	NoSig
ATP2B4	7534.94	0.0191786	0.129384	0.14823	0.882161	0.941374	NoSig
ZC3H11A	3502.52	-0.210112	0.119863	-1.75293	0.0796142	0.218252	NoSig
RIOK2	697.324	-0.199517	0.122115	-1.63385	0.102291	0.258121	NoSig
YIPF1	1286.73	0.0207284	0.129891	0.159584	0.873209	0.936756	NoSig
NDC1	632.161	-0.159005	0.130957	-1.21418	0.224679	0.422907	NoSig
DGKG	101.958	0.275707	0.263175	1.04762	0.294815	0.500914	NoSig
FLYWCH1	8423.01	0.289237	0.135087	2.14111	0.0322654	0.11637	NoSig
UNKL	516.191	0.131058	0.100651	1.30211	0.192879	0.385293	NoSig
TBXAS1	317.082	-0.621266	0.190815	-3.25585	0.00113052	0.0098831	NoSig
PARP12	806.134	-0.600048	0.193972	-3.09347	0.0019783	0.0151693	NoSig
ALDH18A1	2878.02	0.421616	0.103792	4.06213	4.8627e-05	0.000844543	NoSig
TARBP1	1647.21	-0.0387288	0.169672	-0.228256	0.819447	0.906153	NoSig
GATB	1876.34	0.0718358	0.0983863	0.730141	0.465304	0.658616	NoSig
MXD1	248.399	0.189423	0.121331	1.56121	0.118475	0.284368	NoSig
CDK17	924.466	-0.293771	0.110262	-2.66431	0.00771463	0.0413657	NoSig
DNAJC25	384.831	-0.291175	0.138421	-2.10355	0.0354174	0.124206	NoSig
SLC2A3	490.146	-1.04602	0.268779	-3.89176	9.95212e-05	0.00148625	Down
PSD	284.302	0.542341	0.235586	2.3021	0.0213298	0.0870643	NoSig
CTDP1	2112.17	0.229247	0.0983713	2.33043	0.0197835	0.082637	NoSig
YBX3	8663.43	-0.135252	0.105812	-1.27823	0.20117	0.395462	NoSig
STYK1	1.19075	-0.313159	0.57026	-0.549151	0.582902	0.750773	NoSig
WNK1	5901.16	-0.25103	0.08956	-2.80292	0.00506415	0.0305473	NoSig
RPS17P5	2.77237	0.359964	0.338003	1.06497	0.286888	0.492792	NoSig
CCAR1	1084.6	-0.294682	0.205529	-1.43377	0.151637	0.330325	NoSig
OGFR	3593.65	-0.228527	0.144916	-1.57696	0.114805	0.278412	NoSig
GNA15	94.1893	-0.285713	0.214066	-1.3347	0.181976	0.370712	NoSig
CREB3L3	0.445946	-1.24237	0.94916	-1.30892	0.190562	NA	NA
PIGV	864.806	-0.070909	0.115212	-0.615467	0.538246	0.716328	NoSig
PTPRU	3083.07	-0.186075	0.278168	-0.668931	0.50354	0.690215	NoSig
SNRNP40	984.48	-0.0324219	0.0997727	-0.324958	0.745213	0.861514	NoSig
RIMBP2	39.4169	-1.28134	0.437269	-2.93032	0.00338618	0.0225655	Down
COL11A1	902.119	2.35623	0.380257	6.19641	5.77672e-10	9.14558e-08	Up
QSER1	913.203	0.202557	0.126471	1.60161	0.109241	0.268897	NoSig
MPC1	1729.55	-0.0346027	0.139591	-0.247886	0.804223	0.897956	NoSig
ACAA1	1715.31	0.468464	0.129906	3.60618	0.000310741	0.00363403	NoSig
BCAT1	288.96	-0.560803	0.354451	-1.58218	0.113609	0.276394	NoSig
HDAC7	3659.81	-0.00749562	0.126903	-0.059066	0.9529	0.977306	NoSig
LZTS1	12171.5	-0.483046	0.220189	-2.19378	0.0282511	0.105899	NoSig
PRDM6	5.72151	-1.76594	0.361941	-4.87907	1.06585e-06	3.86658e-05	Down
WNT8A	0.0789885	-0.00615042	1.76227	-0.00349005	0.997215	NA	NoSig
SPAG4	136.76	0.314363	0.238778	1.31655	0.187989	0.378759	NoSig
NCKAP1	4677.16	-0.159568	0.123431	-1.29276	0.196093	0.389554	NoSig
MRPS35	1233.46	-0.00263786	0.108496	-0.024313	0.980603	0.990878	NoSig
GUCY1B1	83.0011	-0.946474	0.26234	-3.60781	0.000308791	0.00361585	NoSig
SFSWAP	2476.75	0.142803	0.0766532	1.86298	0.0624652	0.184266	NoSig
TNK2	3279.32	0.76062	0.153176	4.96567	6.8466e-07	2.74556e-05	NoSig
MON2	979.227	-0.402166	0.164904	-2.43879	0.0147367	0.0670137	NoSig
CDH3	465.809	0.279752	0.281088	0.995246	0.319617	0.52719	NoSig
ARSF	1.91567	0.588246	0.528096	1.1139	0.265322	0.470046	NoSig
GPBP1	2256.93	-0.144083	0.130895	-1.10075	0.271007	0.476143	NoSig
DGAT2	221.788	-0.244055	0.179314	-1.36105	0.173497	0.359829	NoSig
ZNF112	132.495	0.0997632	0.164392	0.606863	0.543942	0.720825	NoSig
CS	12654.8	0.0809933	0.12581	0.643777	0.51972	0.702813	NoSig
LTK	219.136	-0.0386825	0.358347	-0.107947	0.914038	0.956864	NoSig
MRPS24	898.474	0.345776	0.152679	2.26473	0.023529	0.0931536	NoSig
ELMO2	2982.03	0.115034	0.0796859	1.44359	0.148854	0.326884	NoSig
WAPL	1544.85	-0.0260903	0.114234	-0.228394	0.81934	0.906117	NoSig
VMP1	4913.88	-0.228337	0.12268	-1.86124	0.0627097	0.184644	NoSig
APPBP2	1259.87	-0.256511	0.123741	-2.07297	0.038175	0.13091	NoSig
POLD1	1627.75	0.681899	0.135822	5.02055	5.15237e-07	2.17105e-05	NoSig
SEZ6	21.3756	-0.588839	0.468446	-1.25701	0.208752	0.40439	NoSig
EIF4B	37558	0.265878	0.130536	2.03682	0.0416682	0.139296	NoSig
SLC6A16	155.73	0.650389	0.174818	3.72038	0.000198927	0.00256758	NoSig
BICRA	1177.66	0.107979	0.108054	0.999311	0.317644	0.525201	NoSig
SPHK2	1144.06	-0.0231404	0.127989	-0.1808	0.856525	0.926991	NoSig
RPL18	102292	0.252556	0.198638	1.27144	0.203573	0.39812	NoSig
CA11	238.295	0.253888	0.232316	1.09286	0.274457	0.479955	NoSig
ISOC2	2885.42	-0.127845	0.143422	-0.891391	0.372719	0.577595	NoSig
U2AF2	7888.37	0.131179	0.0937819	1.39876	0.161884	0.344412	NoSig
EPN1	13089.3	0.347281	0.176653	1.96589	0.0493109	0.156698	NoSig
MED29	2959.7	-0.248298	0.0678186	-3.66122	0.000251021	0.00307479	NoSig
AHRR	1235.96	-0.541679	0.164094	-3.30103	0.000963308	0.00873933	NoSig
GSC2	0.858895	0.860339	0.553718	1.55375	0.120244	0.286929	NoSig
ZNF275	1069.08	-0.034919	0.0797132	-0.438058	0.661344	0.807573	NoSig
MTMR1	1090.67	-0.0752289	0.097739	-0.769691	0.441483	0.638695	NoSig
GPC1	5582.3	-0.604485	0.183134	-3.30078	0.000964155	0.00874215	NoSig
ADCK1	1450.27	-0.00741721	0.118075	-0.0628179	0.949911	0.975813	NoSig
HAGH	1617.82	-0.0737356	0.11056	-0.666931	0.504816	0.691323	NoSig
RNF4	2551.61	0.0198659	0.0776681	0.25578	0.798121	0.894278	NoSig
CASP8	376.649	-0.285081	0.159131	-1.79148	0.0732159	0.205652	NoSig
LIMCH1	308.285	-0.308095	0.22303	-1.38141	0.167154	0.351308	NoSig
INTS13	945.541	-0.117262	0.151881	-0.772067	0.440075	0.6376	NoSig
TM7SF3	3557.6	-0.29511	0.128075	-2.30419	0.021212	0.0868425	NoSig
DLX3	49.2262	1.22851	0.281789	4.35969	1.3025e-05	0.000289563	Up
SPA17	161.794	-0.214526	0.126002	-1.70256	0.088651	0.234404	NoSig
TSPAN32	26.9101	-0.155286	0.239518	-0.648328	0.516773	0.700688	NoSig
CCN5	168.506	3.2473	0.368441	8.81361	1.21177e-18	4.14865e-15	Up
DMRT3	0.85575	0.388354	0.730757	0.531441	0.595113	0.760018	NoSig
ST3GAL6	4064.63	0.545126	0.172931	3.15227	0.00162005	0.0129969	NoSig
ATP2C2	9.73705	-0.355503	0.297313	-1.19572	0.231806	0.431606	NoSig
NGFR	185.939	-1.10971	0.421665	-2.63174	0.00849479	0.0445416	Down
CDON	408.359	0.211113	0.135058	1.56313	0.118022	0.283706	NoSig
TAF2	1022.38	-0.48268	0.234906	-2.05478	0.0399005	0.134901	NoSig
HIPK2	8524.11	0.222724	0.162307	1.37224	0.169989	0.354973	NoSig
TNPO3	2465.06	-0.285248	0.0758499	-3.7607	0.000169441	0.00225612	NoSig
BORCS8-MEF2B	22.7563	0.188919	0.183453	1.0298	0.303106	0.510532	NoSig
RFXANK	3228.41	0.148212	0.161188	0.919498	0.357835	0.564348	NoSig
TMEM161A	3149.51	-0.282875	0.160887	-1.75822	0.0787105	0.216663	NoSig
LPAR2	368.603	0.454696	0.176918	2.5701	0.0101668	0.0509559	NoSig
CTSA	15310.1	-0.151539	0.162473	-0.932703	0.350973	0.557506	NoSig
SUGP2	1496.78	-0.25831	0.0900638	-2.86807	0.0041298	0.0264463	NoSig
SLC12A2	402.728	-0.170846	0.169326	-1.00897	0.312987	0.520294	NoSig
SNX24	434.096	-0.202898	0.123783	-1.63914	0.101185	0.256179	NoSig
EYA2	70.1858	0.534207	0.322197	1.65802	0.0973141	0.25036	NoSig
CNN2	2943.39	0.939757	0.190276	4.93892	7.85555e-07	3.06927e-05	NoSig
ABCA7	477.413	-0.00788565	0.249321	-0.0316285	0.974768	0.988044	NoSig
SNCAIP	6.60873	-0.594501	0.333482	-1.78271	0.0746341	0.20846	NoSig
DDX20	648.559	-0.00590479	0.128653	-0.0458971	0.963392	0.982512	NoSig
BTBD1	1739.89	-0.330186	0.151095	-2.18528	0.028868	0.107384	NoSig
FAR2	2064.85	-0.226453	0.1621	-1.39699	0.162417	0.345053	NoSig
BCAS1	5.38637	0.275346	0.465447	0.591574	0.554136	0.728798	NoSig
POU1F1	0.459314	0.841952	0.527806	1.59519	0.110669	NA	NoSig
CHI3L2	53.0507	-1.0267	0.433077	-2.37071	0.0177539	0.0763839	NoSig
SBNO2	5155.02	0.131283	0.120379	1.09058	0.275456	0.480968	NoSig
PMS1	310.98	-0.199199	0.19338	-1.0301	0.302965	0.510452	NoSig
HMG20B	8349.21	0.611158	0.154921	3.94497	7.98109e-05	0.00124982	NoSig
CALCRL	62.8894	-0.0866821	0.23406	-0.370342	0.711128	0.840616	NoSig
TAF11	1209.76	0.572564	0.10272	5.57404	2.48896e-08	1.98169e-06	NoSig
ANKS1A	3675.97	0.510147	0.118146	4.31793	1.57496e-05	0.000338857	NoSig
AP3D1	13355.4	0.249579	0.10494	2.3783	0.0173925	0.0752548	NoSig
ZNF76	2161.42	0.252434	0.0912135	2.7675	0.00564875	0.0331147	NoSig
SLC9A3R2	2333.34	-0.00786168	0.174506	-0.0450511	0.964067	0.982782	NoSig
NTHL1	1062.36	0.517082	0.160653	3.21863	0.00128806	0.0109154	NoSig
UHRF1BP1	1663.76	0.09175	0.136677	0.671289	0.502036	0.689034	NoSig
GNAI3	2307.61	0.0304763	0.0964849	0.315866	0.752104	0.865885	NoSig
IPO5	7078.67	0.152106	0.11213	1.35652	0.174935	0.361596	NoSig
OAT	2982.61	-0.329613	0.105165	-3.13425	0.00172292	0.0136305	NoSig
WDR3	1487.85	0.000743801	0.114518	0.00649507	0.994818	0.997677	NoSig
PKN2	1512.38	-0.312247	0.205136	-1.52215	0.127973	0.298225	NoSig
WDR18	2326.64	-0.0134054	0.151644	-0.0884007	0.929558	0.964987	NoSig
TRAM2	1947.45	-0.022048	0.146811	-0.15018	0.880623	0.940632	NoSig
NTN1	74.2424	-0.521245	0.280028	-1.8614	0.0626872	0.184629	NoSig
GLP2R	1.01817	-0.697022	0.72215	-0.965204	0.334443	0.541779	NoSig
MCM10	56.8043	-0.00594651	0.239762	-0.0248017	0.980213	0.990727	NoSig
DGKA	350.135	-0.495438	0.184893	-2.67959	0.00737115	0.040089	NoSig
ERBB3	10459.8	0.866234	0.241518	3.58663	0.000334985	0.00384048	NoSig
ROPN1	221.803	3.36352	0.388062	8.66748	4.41807e-18	1.21006e-14	Up
ANKRD44	920.635	-0.410258	0.206932	-1.98258	0.0474145	0.152689	NoSig
KARS1	8048.89	-0.118125	0.0994175	-1.18817	0.234765	0.434974	NoSig
ADAT1	593.171	0.100444	0.128159	0.783748	0.433188	0.632178	NoSig
PDIA5	418.767	0.303718	0.121181	2.50631	0.0121999	0.0584168	NoSig
TBC1D22B	1260.44	0.684737	0.0950518	7.20383	5.85455e-13	3.10772e-10	NoSig
NDUFB4	3879.93	0.482389	0.129889	3.71385	0.000204133	0.00262119	NoSig
SPEN	3173.9	0.110549	0.0996988	1.10883	0.267502	0.47235	NoSig
MYLK	580.629	0.296793	0.19147	1.55007	0.121124	0.288425	NoSig
ZC3H15	1492.47	-0.0452041	0.144316	-0.313231	0.754105	0.867139	NoSig
MAP2K4	788.421	-0.107957	0.09612	-1.12314	0.261377	0.465889	NoSig
PACC1	432.713	-0.487247	0.169938	-2.86721	0.00414113	0.0264837	NoSig
SNAP91	14.771	-1.15756	0.494333	-2.34166	0.0191982	0.0809202	NoSig
SLK	1511.45	-0.0923814	0.136978	-0.674424	0.500042	0.687222	NoSig
CYB5R4	265.251	-0.160885	0.171092	-0.940343	0.347042	0.553264	NoSig
COL17A1	3.7728	-0.504502	0.398046	-1.26745	0.204995	0.399845	NoSig
GSTO2	502.523	1.04475	0.36407	2.86963	0.00410957	0.0263646	Up
SEC61A2	188.304	-0.428425	0.147064	-2.9132	0.00357751	0.0235993	NoSig
PRKCQ	71.3522	0.344761	0.281318	1.22552	0.220378	0.418436	NoSig
TLE2	807.944	0.0672732	0.247447	0.271869	0.785723	0.887942	NoSig
ASB1	1540.51	0.107379	0.0975102	1.10121	0.270805	0.475884	NoSig
FAM107B	445.515	-0.410652	0.177444	-2.31427	0.0206531	0.0852678	NoSig
ME1	206.579	-1.23541	0.337974	-3.65535	0.00025683	0.00311529	Down
TBC1D1	4350.67	-0.539269	0.145299	-3.71144	0.000206082	0.00264127	NoSig
CDK13	1658.59	-0.340124	0.0927845	-3.66574	0.000246625	0.00303314	NoSig
MTHFD2	1026.08	0.035403	0.139699	0.253423	0.799941	0.895329	NoSig
SLC9A7	58.2401	-0.756036	0.338638	-2.23258	0.0255769	0.0989469	NoSig
FOXJ2	1339.58	0.0480264	0.104384	0.460095	0.645448	0.796037	NoSig
YBX1	22124.8	-0.0636946	0.0985185	-0.646524	0.51794	0.701407	NoSig
PDE4A	1228.96	-0.254658	0.155624	-1.63637	0.101763	0.257167	NoSig
PPP2R5A	2310.87	-0.127599	0.172582	-0.739354	0.459692	0.654221	NoSig
CTNNA2	55.5007	0.669797	0.334024	2.00523	0.044938	0.146909	NoSig
ELAVL1	3862.03	0.0930717	0.0731267	1.27275	0.203108	0.397438	NoSig
TIE1	336.786	-0.296029	0.200166	-1.47892	0.139162	0.313782	NoSig
DIP2B	2966.79	-0.135792	0.117266	-1.15798	0.246871	0.449421	NoSig
SMARCD1	4482.27	-0.0159374	0.116187	-0.13717	0.890896	0.946169	NoSig
KDM4A	2227.9	0.0413955	0.132288	0.312919	0.754342	0.867277	NoSig
NFYC	2889.07	0.216566	0.118085	1.83398	0.0666565	0.192268	NoSig
ZMYND12	175.064	0.00882153	0.151215	0.0583377	0.95348	0.977608	NoSig
SLC9A3	708.563	-0.837232	0.320935	-2.60873	0.00908792	0.0468755	NoSig
NGEF	18.6049	-0.122729	0.338253	-0.362832	0.716731	0.844092	NoSig
ASPM	108.81	-0.0607643	0.29674	-0.204773	0.837749	0.916741	NoSig
CD84	132.394	-0.550373	0.302737	-1.81799	0.069066	0.197232	NoSig
ELOVL1	2912.03	0.0622567	0.141061	0.441347	0.658962	0.806484	NoSig
SPI1	609.079	-0.485896	0.247723	-1.96145	0.0498263	0.157877	NoSig
ZNRD1	1269.17	0.588508	0.132923	4.42745	9.53538e-06	0.000226312	NoSig
MPPED2	313.035	1.9697	0.422658	4.66026	3.15805e-06	9.32066e-05	Up
CLDN18	3.47287	-0.621559	0.346317	-1.79477	0.0726903	0.204427	NoSig
ZBTB11	385.481	0.317425	0.197118	1.61033	0.107326	0.265906	NoSig
ATXN3	569.964	-0.212492	0.114675	-1.853	0.0638818	0.186849	NoSig
GOLGA5	1277.1	-0.180471	0.115697	-1.55986	0.118794	0.284873	NoSig
FGFR2	293.546	-0.695375	0.320984	-2.16639	0.0302816	0.111297	NoSig
LRRC40	172.064	-0.232539	0.214113	-1.08606	0.277454	0.483071	NoSig
ISOC1	370.644	0.290922	0.0896136	3.2464	0.00116875	0.0101332	NoSig
EML1	362.695	-0.0966326	0.231684	-0.417088	0.676614	0.818144	NoSig
TRMT11	163.553	-0.172099	0.167832	-1.02543	0.305161	0.512356	NoSig
THUMPD1	1421.63	-0.128659	0.121264	-1.06098	0.288697	0.494907	NoSig
MSANTD3	817.523	0.0496063	0.100697	0.492627	0.622276	0.780155	NoSig
KIF26A	315.514	-0.73848	0.201309	-3.6684	0.000244078	0.00300857	NoSig
ATG2B	1235.64	-0.428113	0.123392	-3.46952	0.000521381	0.00546293	NoSig
ARFGEF1	2455.28	-0.48002	0.232287	-2.06649	0.0387822	0.132289	NoSig
ACSM2B	0.261566	0.517526	0.907648	0.570184	0.568553	NA	NoSig
ZFAT	971.197	0.0541425	0.100163	0.540544	0.588822	0.75551	NoSig
MTFR1	732.357	-0.3206	0.204566	-1.56722	0.117063	0.282091	NoSig
STAG3	102.939	0.390972	0.187936	2.08035	0.0374938	0.129188	NoSig
FECH	920.41	0.12171	0.0901545	1.35002	0.177011	0.364523	NoSig
MYO9A	808.489	-0.168765	0.131417	-1.28419	0.199076	0.393142	NoSig
DDX3Y	513.694	-0.127216	0.747687	-0.170146	0.864895	0.931968	NoSig
PFKP	3935.06	-0.89332	0.200525	-4.4549	8.39317e-06	0.000204835	NoSig
IDI1	1030.65	0.0495784	0.148725	0.333355	0.738866	0.857594	NoSig
SP100	1992.04	-0.144387	0.128638	-1.12243	0.261679	0.466199	NoSig
KLF6	2951.22	0.264461	0.139292	1.89862	0.0576148	0.174385	NoSig
PLPP1	601.833	0.0948266	0.156827	0.604659	0.545406	0.721775	NoSig
NEO1	8550.73	0.545632	0.178889	3.05012	0.00228748	0.0168873	NoSig
TRAM1	6895.84	-0.516763	0.181518	-2.84689	0.00441484	0.0277335	NoSig
PHKA1	486.158	0.523069	0.325661	1.60618	0.108235	0.267195	NoSig
TNFRSF1A	3532.68	-0.427479	0.135919	-3.14511	0.00166022	0.0132648	NoSig
CACNB1	136.097	-0.802621	0.200201	-4.00908	6.09553e-05	0.00100633	NoSig
EVI5	403.111	-0.230985	0.191499	-1.20619	0.227742	0.426739	NoSig
STOML1	735.225	0.0830489	0.125284	0.662885	0.507404	0.693236	NoSig
PKM	40714.5	-0.347244	0.15874	-2.1875	0.0287057	0.106998	NoSig
DHX29	938.352	-0.190985	0.133449	-1.43115	0.152388	0.331409	NoSig
DNTTIP2	1043.91	-0.233362	0.184932	-1.26188	0.206992	0.402607	NoSig
METTL22	611.189	-0.0582425	0.1107	-0.526128	0.598799	0.762495	NoSig
TP53BP1	1392.56	-0.132918	0.100528	-1.3222	0.186102	0.376591	NoSig
TRO	630.724	-0.00684769	0.14911	-0.0459238	0.963371	0.982512	NoSig
RRP15	731.788	0.0572884	0.124733	0.459287	0.646028	0.796492	NoSig
RHOA	15910.2	0.38096	0.104288	3.65295	0.000259244	0.00313762	NoSig
DHX8	2890.53	-0.10127	0.111542	-0.907907	0.363927	0.56965	NoSig
PMS2P4	119.317	0.169117	0.11327	1.49305	0.135425	0.308786	NoSig
PRKCZ	1092.45	0.196422	0.218151	0.900398	0.367908	0.57329	NoSig
ZFY	83.6832	-0.0176228	0.789009	-0.0223354	0.98218	0.991436	NoSig
IARS2	3764.4	-0.0838083	0.113537	-0.738161	0.460417	0.654723	NoSig
SYT1	19.1072	-0.775944	0.532061	-1.45837	0.144737	0.321552	NoSig
NAV3	157.317	-0.031661	0.296047	-0.106946	0.914832	0.957372	NoSig
IDH3G	7287.13	0.0275436	0.191406	0.143902	0.885578	0.943582	NoSig
ROGDI	453.139	-0.402303	0.167938	-2.39554	0.0165958	0.0728318	NoSig
PDZD4	1311.82	-0.355989	0.209617	-1.69828	0.0894543	0.235787	NoSig
ATP2B3	147.587	0.712283	0.424136	1.67938	0.0930789	0.242609	NoSig
ROCK1	888.622	-0.174957	0.177077	-0.98803	0.323138	0.530379	NoSig
CBFB	977.55	-0.554196	0.124799	-4.44071	8.96631e-06	0.000214854	NoSig
PDK3	202.329	0.0980019	0.147324	0.665215	0.505913	0.692047	NoSig
HYAL2	1182.68	0.724358	0.138142	5.24356	1.57508e-07	8.66264e-06	NoSig
HDAC4	4363.13	-0.502949	0.148962	-3.37636	0.000734506	0.00710109	NoSig
RASSF1	984.01	0.389706	0.120097	3.24494	0.00117477	0.010179	NoSig
FGFR3	428.744	0.0327331	0.234688	0.139475	0.889075	0.945041	NoSig
IFI35	1952.57	-0.235764	0.198323	-1.18879	0.234522	0.434772	NoSig
HEATR6	726.871	0.161764	0.0812924	1.98991	0.0466014	0.150924	NoSig
COASY	4608.85	0.0410813	0.117117	0.350773	0.725759	0.849661	NoSig
PLEKHH3	888.904	-0.343186	0.118907	-2.88617	0.00389961	0.0252976	NoSig
MEF2A	955.601	-0.0650164	0.139606	-0.465713	0.641421	0.793676	NoSig
OTUD5	4185.82	0.230853	0.140573	1.64223	0.100543	0.255086	NoSig
TFE3	2970.43	-0.125292	0.125085	-1.00165	0.31651	0.523896	NoSig
TBC1D25	1213.59	0.259366	0.125964	2.05905	0.0394899	0.13391	NoSig
ACSL4	743.91	0.0522565	0.209983	0.248861	0.803468	0.89764	NoSig
INPP5A	1611.61	-0.0961416	0.0664261	-1.44735	0.1478	0.325531	NoSig
GPKOW	1029.99	0.0212536	0.0848263	0.250554	0.802159	0.896858	NoSig
GRIPAP1	2466.19	-0.241735	0.0793989	-3.04457	0.00233017	0.0171378	NoSig
FTSJ1	1287.04	-0.202232	0.0812148	-2.49008	0.0127713	0.0604733	NoSig
PRR11	144.885	0.240978	0.18109	1.3307	0.183286	0.372544	NoSig
REEP1	175.256	-1.54024	0.267383	-5.76041	8.39079e-09	8.52388e-07	Down
ATP11A	4489.79	1.13746	0.163216	6.96905	3.19082e-12	1.33833e-09	Up
POLR1A	5073.35	0.225819	0.117783	1.91725	0.0552059	0.169169	NoSig
LAPTM4A	11438.7	-0.115612	0.0667328	-1.73246	0.0831912	0.224751	NoSig
TTC7A	441.493	-0.102645	0.143124	-0.71718	0.473263	0.66541	NoSig
IP6K2	1498.47	0.589848	0.10954	5.38479	7.25278e-08	4.72706e-06	NoSig
STON1-GTF2A1L	3.22052	0.401464	0.435287	0.922298	0.356373	0.562934	NoSig
SRBD1	594.307	-0.0174519	0.110737	-0.157598	0.874773	0.937856	NoSig
KIF2A	467.299	-0.162347	0.15888	-1.02182	0.306867	0.514305	NoSig
RASGRP2	61.4254	-0.302134	0.268158	-1.1267	0.259869	0.463987	NoSig
PSME4	2283.64	-0.422899	0.159149	-2.65725	0.00787808	0.041971	NoSig
IFT80	185.843	0.0597767	0.220012	0.271697	0.785855	0.887974	NoSig
SIRT2	3859.69	0.163805	0.12565	1.30366	0.19235	0.384535	NoSig
ERLEC1	1132.8	0.0271563	0.13468	0.201635	0.840202	0.917921	NoSig
PPP2R5B	1520.81	0.402904	0.177403	2.27113	0.0231394	0.0919951	NoSig
PYGM	101.473	-0.78926	0.279163	-2.82724	0.00469507	0.0289299	NoSig
PAGE1	0.292118	1.16193	1.35831	0.855418	0.39232	NA	NA
PITX1	52.3395	0.133099	0.36949	0.360223	0.71868	0.845081	NoSig
TRPC7	0.315504	-0.103492	0.936307	-0.110532	0.911988	NA	NoSig
MAST4	183.425	0.0930399	0.187122	0.497216	0.619037	0.777386	NoSig
ADGRF5	250.585	0.44315	0.212575	2.08468	0.0370985	0.128084	NoSig
SDK2	246.234	-0.540516	0.339818	-1.5906	0.111699	0.273081	NoSig
ADAM7	0.00783794	0.0659766	2.9212	0.0225854	0.981981	NA	NoSig
NUP133	2056.7	-0.0110125	0.103288	-0.106619	0.915091	0.957533	NoSig
NUCKS1	8732.67	-0.0706075	0.0937305	-0.753304	0.451267	0.647345	NoSig
VPS35	4461.95	0.0187702	0.0998891	0.187911	0.850947	0.923655	NoSig
DNAJA2	2055.77	-0.188767	0.118649	-1.59097	0.111616	0.272999	NoSig
BCL3	594.691	-0.867833	0.195641	-4.43585	9.1709e-06	0.000219181	NoSig
KCNAB2	32088.6	0.270479	0.178306	1.51694	0.129283	0.299877	NoSig
ABCC9	54.4107	-0.707934	0.250651	-2.82438	0.00473722	0.029111	NoSig
GAL	362.895	1.16879	0.299059	3.90824	9.29717e-05	0.00140997	Up
CLEC2D	199.158	-0.168259	0.290324	-0.579556	0.562214	0.735116	NoSig
FUNDC1	581.975	0.100533	0.11868	0.847094	0.396943	0.599757	NoSig
MAOB	72.0864	-1.27688	0.4353	-2.93334	0.00335339	0.0224114	Down
RORA	223.902	-0.137532	0.203075	-0.677246	0.49825	0.685673	NoSig
DRD4	69.1235	-0.542845	0.240348	-2.25857	0.0239099	0.0942526	NoSig
TGFBR3	836.505	-0.282182	0.153705	-1.83586	0.0663781	0.191735	NoSig
PLA2G10	1.52771	0.522977	0.348863	1.49909	0.13385	0.306345	NoSig
HES2	21.0159	-0.927576	0.339223	-2.73441	0.00624921	0.0355545	NoSig
ATP1B3	2985.24	-0.118621	0.0966571	-1.22724	0.219733	0.417588	NoSig
NEDD4	226.343	-0.448261	0.172212	-2.60297	0.00924201	0.0474469	NoSig
PIGB	489.424	-0.319745	0.113698	-2.81222	0.00492011	0.0299009	NoSig
MAPK6	643.919	-0.362963	0.183121	-1.98209	0.0474691	0.152777	NoSig
GNB5	807.636	-0.793397	0.173678	-4.56821	4.91907e-06	0.000133263	NoSig
RAB27A	3570.94	-0.320442	0.153669	-2.08527	0.0370446	0.127979	NoSig
HDHD5	1472.6	0.216458	0.0890489	2.43078	0.0150665	0.0681196	NoSig
UFD1	2011.32	-0.1794	0.0715877	-2.50601	0.0122102	0.0584338	NoSig
LRP6	931.532	0.247873	0.127278	1.9475	0.0514752	0.161357	NoSig
GUCY2C	11.2703	-1.19978	0.2768	-4.33447	1.46112e-05	0.000319637	Down
SCT	14.7576	0.964288	0.386704	2.49361	0.0126451	0.0600343	NoSig
PHRF1	3712.66	0.260449	0.119031	2.18808	0.0286637	0.106914	NoSig
ELP1	1548.79	0.0458005	0.0950081	0.482069	0.629757	0.785224	NoSig
NUCB2	831.149	-0.37964	0.181028	-2.09713	0.0359822	0.125576	NoSig
PFN2	1879.03	-0.038326	0.154745	-0.247672	0.804388	0.897994	NoSig
PTPN3	763.494	0.355418	0.189006	1.88046	0.0600453	0.179441	NoSig
SPTB	31.7698	-0.392755	0.213773	-1.83725	0.0661725	0.191443	NoSig
DAPP1	11.5467	-1.30955	0.393207	-3.33043	0.000867133	0.00805081	Down
FGF10	0.592454	-1.2055	0.80964	-1.48894	0.136504	NA	NA
SLC44A1	976.82	0.368548	0.161541	2.28145	0.022522	0.0902493	NoSig
TMEM260	672.321	-0.204365	0.142306	-1.4361	0.150974	0.329588	NoSig
SMG6	1748.45	0.17352	0.158408	1.0954	0.27334	0.478739	NoSig
EXOC5	1032.95	-0.236565	0.159722	-1.48111	0.138579	0.31293	NoSig
CLTCL1	324.349	0.295253	0.135811	2.174	0.0297052	0.109841	NoSig
FGF22	10.2098	0.186095	0.237836	0.78245	0.43395	0.632589	NoSig
FSTL3	2812.02	0.518846	0.213862	2.42608	0.0152631	0.0687939	NoSig
DGCR2	6577.04	0.13871	0.0956281	1.45052	0.146915	0.324399	NoSig
RNF126	1592.76	0.116784	0.107146	1.08995	0.275736	0.481375	NoSig
MNT	3275.37	0.2598	0.114374	2.2715	0.0231168	0.0919333	NoSig
ZXDC	812.864	0.525115	0.104161	5.04139	4.62169e-07	2.01245e-05	NoSig
JMJD6	792.599	0.125299	0.0759909	1.64886	0.099176	0.253344	NoSig
POLB	1149.02	-0.0544808	0.158051	-0.344703	0.730317	0.852737	NoSig
ST6GALNAC1	6.57692	0.202665	0.356319	0.568775	0.569509	0.7408	NoSig
WIPI1	1961.89	-0.829674	0.168793	-4.91535	8.86253e-07	3.34808e-05	NoSig
FRMPD1	17.699	-1.24638	0.376249	-3.31266	0.000924147	0.00845366	Down
GBA2	3435.94	0.10523	0.096292	1.09282	0.274473	0.479955	NoSig
NDST1	6348.09	0.167051	0.13733	1.21641	0.223827	0.42212	NoSig
ASNS	345.471	-0.197472	0.212146	-0.930832	0.351941	0.5584	NoSig
AP3M2	1822.67	0.0123058	0.162197	0.0758697	0.939523	0.970455	NoSig
CNGB1	10.2743	-1.52158	0.70132	-2.1696	0.0300372	0.11068	NoSig
ST6GALNAC2	17693.4	-0.0811024	0.158896	-0.51041	0.609764	0.771007	NoSig
CHAT	0.566512	-0.436081	1.06305	-0.410217	0.681646	NA	NoSig
PABPC1	123159	0.0672569	0.132252	0.508549	0.611068	0.77159	NoSig
TESK2	288.318	0.403276	0.195621	2.06151	0.0392541	0.13349	NoSig
CFAP20	918.72	-0.0130729	0.0828494	-0.157791	0.874621	0.937794	NoSig
CSNK2A2	5018.09	0.193201	0.138069	1.3993	0.161722	0.3443	NoSig
PTPN21	536.731	0.38912	0.171076	2.27455	0.0229331	0.0914193	NoSig
EIF2B3	769.358	-0.0390194	0.108754	-0.358787	0.719754	0.845954	NoSig
CAMK2A	95.7842	-0.618072	0.313069	-1.97424	0.0483548	0.154628	NoSig
TCOF1	4032.83	0.11621	0.099771	1.16477	0.244113	0.445949	NoSig
CDC42	4764.73	-0.0289814	0.102125	-0.283782	0.776577	0.88117	NoSig
OSBPL3	193.421	-0.77271	0.217861	-3.5468	0.000389942	0.00433271	NoSig
EPHA8	61.2704	-0.465502	0.41283	-1.12759	0.259494	0.463589	NoSig
SLC12A3	1.52889	-0.949397	0.495372	-1.91653	0.0552972	0.169269	NoSig
RAD18	292.808	0.477331	0.145729	3.27547	0.00105486	0.00935688	NoSig
ATP2B1	861.96	-0.562825	0.156129	-3.60486	0.000312321	0.00364472	NoSig
TRPM5	1.39473	-0.579535	0.421252	-1.37574	0.168901	0.353726	NoSig
NCK2	2084.58	0.367363	0.0948407	3.87347	0.000107296	0.00157235	NoSig
MAP4K4	7588.3	0.0657963	0.0864299	0.761268	0.446497	0.643221	NoSig
MGAT4A	1413.11	-0.111913	0.164164	-0.681716	0.495419	0.683544	NoSig
RPL31	57840.9	0.143964	0.143816	1.00103	0.316815	0.524264	NoSig
WDR1	20768.1	0.278343	0.0980856	2.83776	0.00454313	0.0282253	NoSig
SNX13	745.632	-0.195064	0.183926	-1.06056	0.288892	0.495116	NoSig
MS4A12	1.18845	-1.09066	0.415197	-2.62686	0.00861774	0.0450012	Down
ARHGAP10	585.954	-0.49051	0.125133	-3.91991	8.85816e-05	0.00135389	NoSig
RPS6KA2	1453.68	-1.00923	0.275954	-3.65724	0.000254941	0.00310199	Down
ING3	369.43	0.191857	0.126134	1.52106	0.128244	0.298503	NoSig
VASH1	523.933	-0.73661	0.195302	-3.77165	0.000162172	0.00217625	NoSig
LMCD1	857.65	1.85383	0.256971	7.21417	5.42659e-13	2.97257e-10	Up
BUD23	4642.36	-0.175373	0.0813524	-2.15573	0.0311051	0.11335	NoSig
SEL1L	3103.48	-0.0108409	0.13419	-0.0807877	0.935611	0.968423	NoSig
TRIP13	195.742	0.173645	0.14101	1.23143	0.218161	0.415989	NoSig
ATP6AP1	13900.6	0.238648	0.163829	1.45669	0.145203	0.321944	NoSig
TCF3	2271.68	0.119741	0.10867	1.10188	0.270516	0.475631	NoSig
TRIB2	10357	0.832148	0.225822	3.68498	0.000228724	0.0028566	NoSig
DAZAP1	4856.76	0.110975	0.0756489	1.46698	0.142381	0.31797	NoSig
MBD3	7388.7	0.0760597	0.153139	0.496672	0.61942	0.777797	NoSig
PRLH	0.580779	0.0434856	0.740904	0.0586926	0.953197	NA	NoSig
HLTF	581.937	0.424696	0.189467	2.24153	0.0249919	0.0973136	NoSig
FAM50A	5070.08	-0.175192	0.124331	-1.40908	0.158811	0.340457	NoSig
FAM3A	3401.59	0.0916865	0.136419	0.672097	0.501522	0.688703	NoSig
CPSF1	7890.57	0.126913	0.121392	1.04548	0.295802	0.502058	NoSig
MYO3B	1.17855	-1.04241	0.558711	-1.86575	0.062077	0.183412	NoSig
CYBRD1	1690.41	-0.759754	0.29938	-2.53776	0.0111566	0.0546887	NoSig
CDH19	2584.87	0.469844	0.30178	1.55691	0.119493	0.285908	NoSig
PDCD2	1869.8	0.00743859	0.141947	0.052404	0.958207	0.980077	NoSig
SLC6A15	3241.36	1.03814	0.216351	4.79843	1.59917e-06	5.35449e-05	Up
RDH11	1914.42	-0.298286	0.151605	-1.96752	0.0491234	0.156356	NoSig
PRKACA	6579.21	-0.179117	0.133528	-1.34142	0.179783	0.367833	NoSig
ADGRL1	2527	-0.247886	0.141581	-1.75084	0.0799728	0.218753	NoSig
SPP2	0.00878781	0.210245	2.9212	0.0719719	0.942624	NA	NoSig
ACTN1	8177.74	-0.317143	0.134659	-2.35517	0.0185144	0.0788265	NoSig
ZFYVE26	2895.58	-0.137149	0.0859782	-1.59516	0.110677	0.27133	NoSig
RPS6KA6	38.2554	0.0307411	0.299701	0.102573	0.918302	0.959237	NoSig
EPN2	750.862	0.0685706	0.0694688	0.98707	0.323609	0.530896	NoSig
PTPN18	3503.46	-0.117434	0.14072	-0.834528	0.403983	0.606185	NoSig
LIMS2	5370.97	2.15896	0.31842	6.78022	1.19991e-11	3.82142e-09	Up
ASIC4	55.8538	-0.644966	0.373442	-1.72709	0.0841523	0.226517	NoSig
SPEG	194.124	0.146903	0.178285	0.823979	0.409952	0.611656	NoSig
LNX1	59.2146	-0.145478	0.158799	-0.916118	0.359605	0.565762	NoSig
ALDH3A2	1627.84	0.130473	0.160006	0.815422	0.414831	0.61575	NoSig
TFRC	1138.45	-0.348546	0.196922	-1.76997	0.0767316	0.212746	NoSig
SREBF1	12813.8	-0.140416	0.147876	-0.949557	0.342337	0.548834	NoSig
TRPC5	0.289016	-0.815006	0.807086	-1.00981	0.312585	NA	NoSig
AFF4	2780.46	-0.352824	0.142025	-2.48424	0.0129829	0.0612136	NoSig
UBE2D1	383.697	0.225399	0.11972	1.88272	0.059739	0.17876	NoSig
MPP5	782.08	-0.0225043	0.121783	-0.18479	0.853394	0.925101	NoSig
RHOBTB1	1062.49	0.608292	0.134256	4.53084	5.87507e-06	0.000153104	NoSig
SMC1A	3238.68	-0.0462546	0.0978081	-0.472911	0.636276	0.789822	NoSig
HSD17B10	3549.92	0.0904037	0.143199	0.631313	0.527836	0.708175	NoSig
MARK2	3089.65	0.170435	0.112567	1.51408	0.130006	0.300868	NoSig
HMMR	61.7327	-0.0753686	0.296642	-0.254072	0.79944	0.895097	NoSig
CHFR	756.012	0.0574561	0.0774867	0.741497	0.458392	0.653075	NoSig
TRHDE	1.81017	-0.53211	0.454591	-1.17052	0.24179	0.443244	NoSig
P4HA2	1165.81	-0.757369	0.170125	-4.45185	8.51349e-06	0.000206533	NoSig
FCGR2B	49.5287	0.362463	0.3649	0.993324	0.320552	0.528146	NoSig
NFATC3	544.351	-0.214533	0.0989811	-2.16742	0.0302031	0.111131	NoSig
TRNT1	341.872	0.217048	0.142014	1.52835	0.126426	0.295778	NoSig
ACADVL	10205.8	-0.494151	0.134874	-3.66379	0.000248509	0.0030481	NoSig
STK10	7072.84	-0.263007	0.16445	-1.59931	0.109751	0.26986	NoSig
FBXW11	1938.2	0.0235567	0.0834348	0.282337	0.777685	0.881706	NoSig
ACAP1	177.028	-0.434839	0.248747	-1.74811	0.0804441	0.219735	NoSig
CRMP1	874.436	-0.16321	0.180366	-0.904886	0.365526	0.571221	NoSig
EVC	2123.85	0.102048	0.183232	0.556932	0.577574	0.746504	NoSig
DERL2	1610.77	-0.220601	0.0781893	-2.82138	0.00478183	0.0293062	NoSig
SIDT1	36.8633	0.0949801	0.236348	0.401865	0.687783	0.825812	NoSig
NDE1	1747.7	0.141022	0.120608	1.16926	0.2423	0.443784	NoSig
MRVI1	124.852	-0.125962	0.219685	-0.573373	0.566392	0.73878	NoSig
TMEM38A	201.448	0.50902	0.186198	2.73375	0.00626178	0.0356113	NoSig
AP1M1	4467.31	-0.0950779	0.122762	-0.774491	0.438641	0.636198	NoSig
PVR	1504.41	0.152422	0.101969	1.49478	0.134971	0.307956	NoSig
XRCC1	3283.79	0.106307	0.141235	0.752697	0.451632	0.647653	NoSig
SCARB1	13687.8	-0.0754608	0.140942	-0.535404	0.59237	0.75808	NoSig
CYP2W1	11.1251	0.527601	0.278785	1.8925	0.0584246	0.176077	NoSig
MCM2	1498.8	0.919155	0.143099	6.42319	1.33451e-10	2.83339e-08	NoSig
MOV10L1	28.7679	-0.213006	0.429628	-0.495792	0.620041	0.778113	NoSig
PANX2	298.951	-0.969444	0.287041	-3.37738	0.000731812	0.00707754	NoSig
SELENOO	1558.83	-0.0615966	0.121179	-0.50831	0.611236	0.771694	NoSig
TP63	10.1138	0.113212	0.302168	0.374664	0.70791	0.838311	NoSig
ALPK1	639.64	-0.462689	0.109632	-4.22037	2.43903e-05	0.000485485	NoSig
LLGL2	359.934	0.00665502	0.132878	0.0500836	0.960056	0.981132	NoSig
PDE8A	1488.67	-0.122924	0.136745	-0.898922	0.368694	0.573922	NoSig
CLCN4	174.843	-0.833034	0.340409	-2.44716	0.0143987	0.0659808	NoSig
NLE1	2642.19	0.305102	0.165522	1.84327	0.0652891	0.189509	NoSig
SDHA	9632.18	-0.428814	0.108967	-3.93526	8.31068e-05	0.0012831	NoSig
SMARCE1	1687.88	-0.0692201	0.0898761	-0.770173	0.441197	0.638491	NoSig
FNDC8	3.8754	0.711205	0.317721	2.23846	0.0251913	0.0978394	NoSig
GSDMB	73.8311	-0.0638387	0.299702	-0.213007	0.831321	0.912624	NoSig
KDM5A	1645.54	-0.0127902	0.0975329	-0.131137	0.895667	0.948056	NoSig
ADAM11	485.876	-1.2969	0.267439	-4.84932	1.23884e-06	4.35565e-05	Down
PPP2R3A	715.775	0.224989	0.140801	1.59792	0.110061	0.270355	NoSig
FERMT2	842.363	-0.278198	0.153077	-1.81737	0.06916	0.197376	NoSig
ABCB11	0.234341	-0.816631	0.967636	-0.843944	0.398701	NA	NoSig
DHRS9	13.0809	0.649818	0.505976	1.28429	0.199042	0.393132	NoSig
CD5L	37.569	-2.78481	0.795582	-3.50034	0.000464669	0.00497336	Down
PTGS2	11.8421	-0.49862	0.331131	-1.50581	0.132117	0.303906	NoSig
IGF2BP2	1505.66	0.439225	0.17378	2.52748	0.0114885	0.0559295	NoSig
MAP3K13	871.068	0.706624	0.146059	4.83793	1.312e-06	4.55441e-05	NoSig
ST6GAL1	1816.96	0.602189	0.186385	3.23089	0.00123405	0.0105693	NoSig
TBX21	20.2383	-0.726357	0.427646	-1.6985	0.0894128	0.235787	NoSig
VDAC1P1	6.91319	-0.344111	0.205051	-1.67817	0.0933134	0.243012	NoSig
FRY	511.126	-1.151	0.192894	-5.96702	2.41619e-09	3.06308e-07	Down
PICALM	3985.44	-0.00659004	0.10212	-0.0645324	0.948546	0.975176	NoSig
NSF	1354.28	-0.535707	0.128932	-4.15495	3.25358e-05	0.000606689	NoSig
GLI2	56.6301	-1.10679	0.296285	-3.73557	0.000187292	0.00244418	Down
CLASP1	2832.65	-0.100763	0.0788502	-1.27791	0.201282	0.395502	NoSig
MRPS34	4341	-0.113618	0.135278	-0.839885	0.400973	0.603318	NoSig
NOTCH3	1918.06	-0.403655	0.219757	-1.83682	0.0662361	0.191527	NoSig
CLNS1A	2414.75	0.00248211	0.0817389	0.0303663	0.975775	0.988406	NoSig
PPP2R2C	26.9783	0.0247017	0.36186	0.0682631	0.945576	0.973796	NoSig
TEAD2	2480.82	0.484469	0.154296	3.13986	0.00169029	0.0134423	NoSig
EED	615.446	-0.310796	0.093221	-3.33397	0.000856161	0.00799502	NoSig
CDHR2	31.5549	-0.103966	0.221428	-0.469523	0.638696	0.791662	NoSig
SNCB	355.734	0.52576	0.366621	1.43407	0.151552	0.330253	NoSig
TSG101	3532.11	0.188801	0.0669542	2.81985	0.00480455	0.0293928	NoSig
NCBP3	1758.83	-0.0990201	0.110021	-0.900012	0.368114	0.573443	NoSig
ATP2A3	688.739	0.00904624	0.238531	0.0379248	0.969748	0.985398	NoSig
CA12	279.997	-0.680801	0.45318	-1.50227	0.133026	0.305147	NoSig
MGLL	1451.72	-0.906461	0.247671	-3.65994	0.000252271	0.00308321	NoSig
NTN4	310.828	0.404997	0.24672	1.64152	0.100689	0.255302	NoSig
BCS1L	1582.23	-0.0510422	0.10103	-0.505217	0.613407	0.773288	NoSig
NUAK1	126.307	-0.19399	0.166095	-1.16795	0.242829	0.444414	NoSig
DPP8	1149.21	-0.0439488	0.130435	-0.336941	0.736162	0.85617	NoSig
SLC24A1	889.911	0.00317831	0.164371	0.0193362	0.984573	0.992472	NoSig
ZNF532	1770.95	0.927329	0.217268	4.26814	1.97107e-05	0.000409914	NoSig
SCARF1	222.894	-0.183549	0.198378	-0.92525	0.354836	0.561366	NoSig
LMAN1	2572.31	-0.389782	0.174989	-2.22747	0.0259159	0.0998747	NoSig
HACD3	4289.92	0.240053	0.119433	2.00994	0.0444373	0.145672	NoSig
IPCEF1	14.9988	-0.887706	0.367561	-2.41513	0.0157297	0.0702692	NoSig
ZZEF1	3398.09	-0.00737688	0.0840524	-0.0877652	0.930063	0.965093	NoSig
NOX3	1.4978	-0.189462	0.531856	-0.356228	0.72167	0.847178	NoSig
ENO1	64658.1	0.210771	0.184825	1.14039	0.254126	0.45761	NoSig
SLC12A1	3.88472	-0.725407	0.433157	-1.6747	0.0939938	0.244157	NoSig
MYDGF	3198.37	-0.0728145	0.0970207	-0.750505	0.452951	0.64884	NoSig
ANO8	288.397	0.722639	0.172709	4.18413	2.86255e-05	0.000549422	NoSig
TUBE1	270.726	-0.478826	0.15799	-3.03073	0.0024396	0.0177142	NoSig
ARHGEF10L	1615.09	-0.0854216	0.132703	-0.643707	0.519766	0.702813	NoSig
TXK	11.0149	-0.7142	0.272549	-2.62045	0.0087815	0.0456129	NoSig
WSCD2	19.8914	-0.365446	0.780503	-0.468218	0.639628	0.792275	NoSig
KCNQ2	103.038	-0.438571	0.498355	-0.880036	0.37884	0.583235	NoSig
TACR2	241.541	0.408931	0.214866	1.90319	0.0570152	0.172979	NoSig
ACTR6	567.269	-0.192534	0.112805	-1.70679	0.0878618	0.23307	NoSig
TIPIN	170.222	-0.299418	0.102498	-2.9212	0.0034869	0.0231241	NoSig
SRI	2245.35	-0.0470509	0.0668996	-0.703307	0.481865	0.67267	NoSig
EIF4G3	2710.97	-0.433913	0.155624	-2.78821	0.00530006	0.0316054	NoSig
NUP37	503.188	-0.103412	0.0859364	-1.20336	0.228838	0.427913	NoSig
SEMA3A	28.4284	0.0808308	0.291814	0.276994	0.781785	0.885062	NoSig
GTSE1	239.98	0.0463237	0.225335	0.205578	0.837121	0.916163	NoSig
SEMA3C	811.216	2.50189	0.41663	6.00507	1.91252e-09	2.55522e-07	Up
TTC38	2093.44	-0.229176	0.129808	-1.7655	0.0774804	0.214225	NoSig
ACAT1	2181.68	-0.0582066	0.0983025	-0.592117	0.553772	0.72846	NoSig
GRAMD4	2483.29	-0.06915	0.130743	-0.528898	0.596876	0.760931	NoSig
CELSR1	1957.15	-0.37083	0.242452	-1.5295	0.126141	0.295368	NoSig
WNT8B	2.74122	0.920527	0.383405	2.40093	0.0163535	0.0720454	NoSig
ZNF638	2429.66	-0.305098	0.163901	-1.86148	0.0626769	0.184629	NoSig
SLC25A40	396.638	0.10001	0.157007	0.636977	0.52414	0.705681	NoSig
TIMM21	700.92	-0.258377	0.0866549	-2.98168	0.00286672	0.0200195	NoSig
ADD2	75.7595	-0.560111	0.276013	-2.0293	0.0424281	0.141052	NoSig
FGF4	0.14656	0.429843	1.14945	0.373956	0.708437	NA	NoSig
RASAL2	880.802	-0.519419	0.163398	-3.17886	0.00147855	0.0120811	NoSig
VPS9D1	1109.72	-0.0731522	0.16469	-0.44418	0.656913	0.804983	NoSig
ZNF37A	561.17	-0.0903796	0.153366	-0.589306	0.555656	0.729988	NoSig
MARK3	1944.32	-0.426874	0.112647	-3.78948	0.00015096	0.00204584	NoSig
SLC25A3	32608.7	-0.0500057	0.104688	-0.477662	0.632891	0.787344	NoSig
FNDC3B	1063.13	0.118438	0.135352	0.875039	0.381553	0.58579	NoSig
FOSL2	1380.34	0.381601	0.17415	2.19123	0.0284353	0.106265	NoSig
CACNG5	12.6647	-1.887	0.378468	-4.98589	6.16784e-07	2.51385e-05	Down
CACNG4	7.80139	-1.64113	0.375848	-4.36647	1.26271e-05	0.000282551	Down
FRYL	1734.74	0.0185846	0.159835	0.116274	0.907436	0.953639	NoSig
TMEM131	2363.4	-0.15027	0.0885167	-1.69765	0.0895744	0.23599	NoSig
FSCN1	9103.75	0.201653	0.216643	0.930807	0.351954	0.5584	NoSig
ACTB	133626	-0.0399859	0.145864	-0.274131	0.783984	0.886647	NoSig
MOCOS	293.894	-0.215384	0.167538	-1.28558	0.198589	0.392605	NoSig
PLD1	389.544	0.432284	0.184025	2.34905	0.0188215	0.079868	NoSig
ATP12A	0.940403	-1.0416	0.685293	-1.51994	0.128527	0.29892	NoSig
WDR62	214.647	-0.1531	0.174916	-0.875278	0.381423	0.585746	NoSig
DLG1	1169.16	0.0584188	0.189801	0.30779	0.758242	0.869231	NoSig
RAB7A	18477.9	0.550569	0.106554	5.16702	2.37859e-07	1.2042e-05	NoSig
BCAP29	850.002	-0.600039	0.153248	-3.91548	9.02243e-05	0.00137439	NoSig
SEC31B	254.627	0.00318376	0.239108	0.0133151	0.989376	0.995148	NoSig
SART3	2482.94	-0.0459608	0.0764233	-0.601398	0.547575	0.723505	NoSig
ARHGAP15	70.966	0.126325	0.249651	0.506005	0.612853	0.772846	NoSig
TUBA3D	7.32068	0.206584	0.191446	1.07907	0.280556	0.486585	NoSig
PAX2	1.79329	0.126524	0.842528	0.150172	0.880629	0.940632	NoSig
EXOSC7	1216.71	0.443734	0.0983728	4.51074	6.4603e-06	0.000165211	NoSig
KIFAP3	1106.15	-0.100322	0.10477	-0.957544	0.338293	0.545368	NoSig
MKRN2	1248.58	0.829225	0.128432	6.45651	1.07142e-10	2.31064e-08	NoSig
MCM6	939.223	-0.270795	0.114597	-2.36302	0.0181269	0.0774996	NoSig
REXO2	1189.51	0.216056	0.104115	2.07517	0.037971	0.130455	NoSig
RBM7	445.437	0.0765946	0.118238	0.647799	0.517115	0.700909	NoSig
RBMS2	2175.61	0.252321	0.142263	1.77362	0.0761253	0.211524	NoSig
BAZ2A	4272.78	0.100106	0.0912333	1.09726	0.27253	0.47776	NoSig
PTPN23	7181.34	0.909284	0.195564	4.64954	3.32683e-06	9.73489e-05	NoSig
MLH1	1059.12	0.228127	0.0871093	2.61886	0.0088225	0.0457564	NoSig
UNG	2652.9	-0.0571669	0.114521	-0.499183	0.61765	0.776571	NoSig
FMO4	554.546	0.556512	0.145592	3.82242	0.000132148	0.00184194	NoSig
KLHL20	320.478	-0.192736	0.123009	-1.56684	0.117151	0.282254	NoSig
RGS11	470.423	-0.762626	0.266899	-2.85735	0.0042719	0.0271154	NoSig
SLC46A1	473.297	-0.470304	0.12772	-3.68232	0.000231121	0.00288522	NoSig
PLXNA2	2788.7	0.136976	0.254282	0.538676	0.590111	0.75639	NoSig
SPAG5	398.002	-0.0107844	0.162724	-0.0662742	0.947159	0.974503	NoSig
ANKRD13A	2109.19	0.437546	0.0921682	4.74725	2.06197e-06	6.58219e-05	NoSig
TPD52	498.039	-0.455687	0.342331	-1.33113	0.183147	0.372395	NoSig
ACACB	1973.6	-0.823302	0.145481	-5.65919	1.52093e-08	1.34257e-06	NoSig
TRAF4	4129.75	0.263668	0.113715	2.31867	0.0204128	0.0845947	NoSig
PAG1	2839.15	-0.581202	0.191332	-3.03766	0.00238424	0.0174232	NoSig
GPATCH1	502.467	0.0713489	0.0804504	0.886868	0.37515	0.57995	NoSig
ICAM3	14.9068	-1.48111	0.38234	-3.8738	0.000107153	0.0015711	Down
NT5C2	1183.88	-0.157749	0.138698	-1.13736	0.255389	0.458989	NoSig
MCAM	9900.71	0.00532625	0.207938	0.0256145	0.979565	0.99045	NoSig
GPC4	145.677	-0.823212	0.328693	-2.5045	0.0122623	0.0585721	NoSig
MBNL3	56.0561	-0.69934	0.313827	-2.22843	0.0258522	0.0996805	NoSig
CAMSAP3	679.532	1.51282	0.328544	4.60463	4.13202e-06	0.000115482	Up
RAP1GAP	3009.85	-0.735166	0.217659	-3.3776	0.000731214	0.00707675	NoSig
XAB2	6261.63	0.311609	0.169562	1.83773	0.0661026	0.191307	NoSig
ARHGEF1	4920.83	0.175263	0.0973537	1.80027	0.0718182	0.202628	NoSig
STXBP2	2544.78	0.0211274	0.224818	0.0939752	0.925129	0.962505	NoSig
MAP2K7	2987.72	0.0386786	0.110746	0.349254	0.726898	0.85064	NoSig
NMRK2	794.783	1.17043	0.325668	3.59395	0.000325707	0.00376272	Up
DGKD	1192.25	0.362325	0.131088	2.76398	0.00571009	0.0333178	NoSig
CTTNBP2	51.6616	-1.0993	0.397296	-2.76696	0.00565823	0.0331494	Down
ACTL6B	3.41101	-0.278254	0.472734	-0.588605	0.556126	0.73041	NoSig
RARB	373.472	0.390915	0.252389	1.54886	0.121416	0.288718	NoSig
TOP2B	2706.41	0.321293	0.144738	2.21982	0.0264307	0.101133	NoSig
TM9SF3	4827.7	-0.185494	0.0866736	-2.14014	0.0323435	0.116529	NoSig
NFKB2	3303.22	0.12282	0.145025	0.846889	0.397057	0.599774	NoSig
UBE2T	195.788	0.0280421	0.174065	0.161101	0.872014	0.935977	NoSig
PPP1R12B	889.244	-0.799352	0.164886	-4.84792	1.24765e-06	4.37539e-05	NoSig
DNAJC10	3311.84	-0.399647	0.145968	-2.73791	0.00618312	0.0352591	NoSig
GTF3C1	7895.94	0.0687897	0.12835	0.535955	0.59199	0.757846	NoSig
IL4R	1165.2	0.0674277	0.124111	0.543287	0.586932	0.753833	NoSig
USP33	1427.56	-0.153687	0.155803	-0.986418	0.323928	0.531261	NoSig
PAK3	128.857	1.96136	0.40123	4.88836	1.01682e-06	3.72321e-05	Up
CAPN6	18.4681	1.86799	0.54499	3.42757	0.000609008	0.00615503	Up
DCX	4.48368	-2.2868	0.492197	-4.6461	3.38266e-06	9.87716e-05	Down
SNRPA	4860.22	0.397841	0.165711	2.40082	0.0163586	0.072056	NoSig
SPAG6	11.4429	1.25766	0.457338	2.74995	0.00596047	0.0344267	Up
EXOSC5	1208.58	0.436331	0.123295	3.53891	0.000401778	0.00443707	NoSig
DYNC1I2	2073.38	-0.107973	0.105071	-1.02762	0.304131	0.511378	NoSig
APBB1IP	125.383	-0.581586	0.291687	-1.99387	0.046166	0.149886	NoSig
LRCH4	1183.3	0.392307	0.150156	2.61266	0.00898405	0.046471	NoSig
FAM76B	388.347	0.133089	0.212821	0.625354	0.531739	0.711124	NoSig
SIRT6	956.914	-0.0506605	0.118508	-0.427488	0.669024	0.813456	NoSig
TYR	27703.5	0.336516	0.179204	1.87783	0.0604042	0.180101	NoSig
POLD3	490.13	-0.0744369	0.0776883	-0.958148	0.337988	0.54518	NoSig
ACTN2	23.1341	-0.207197	0.264894	-0.78219	0.434103	0.632589	NoSig
CAPZB	8833.3	-0.0248286	0.106482	-0.233172	0.815628	0.904001	NoSig
GPR137B	9207.09	-0.117598	0.1291	-0.910907	0.362345	0.568107	NoSig
NAALAD2	28.2763	-1.46842	0.310226	-4.73338	2.2081e-06	6.93553e-05	Down
JADE1	1856.9	0.0563097	0.130511	0.431456	0.666137	0.811169	NoSig
SLC25A43	1164.25	-0.123738	0.100727	-1.22846	0.219276	0.417211	NoSig
UBE2A	2017.26	-0.317123	0.109446	-2.89752	0.00376129	0.0245451	NoSig
FGFR1	2381.37	-0.488832	0.252757	-1.934	0.0531135	0.16473	NoSig
FKBP6	2.17196	0.669077	0.313106	2.1369	0.0326062	0.117183	NoSig
SMC1B	4.50766	0.955092	0.325065	2.93816	0.00330172	0.0221698	NoSig
FBLN1	1559.55	0.695924	0.281836	2.46926	0.0135394	0.0631954	NoSig
ITGA8	46.8498	0.566912	0.385047	1.47232	0.140935	0.316115	NoSig
CST7	136.362	-1.31344	0.424584	-3.09346	0.00197835	0.0151693	Down
MAP2	2059.65	-0.76061	0.299379	-2.54063	0.0110654	0.0543469	NoSig
PIAS2	824.506	-0.251459	0.100858	-2.49319	0.0126602	0.0600883	NoSig
AMPH	26.2215	-0.627104	0.350953	-1.78686	0.0739597	0.207125	NoSig
ARAF	3151.96	0.110495	0.152205	0.725959	0.467864	0.660699	NoSig
MCCC1	537.146	0.158592	0.118469	1.33867	0.180677	0.369002	NoSig
LAMP3	16.8793	-0.139938	0.381515	-0.366797	0.71377	0.842105	NoSig
FAP	124.77	0.776162	0.484488	1.60202	0.10915	0.268738	NoSig
NEBL	29.471	-0.74829	0.396266	-1.88835	0.0589787	0.17716	NoSig
ACER3	1440.7	0.13325	0.126875	1.05025	0.293605	0.499692	NoSig
UBE2K	2234.41	-0.0597064	0.118312	-0.504652	0.613803	0.77358	NoSig
PIK3C3	1168.35	-0.138962	0.116855	-1.18918	0.234367	0.434602	NoSig
N4BP2	201.894	0.152951	0.233542	0.654917	0.512521	0.697416	NoSig
TIGAR	631.981	-0.0626065	0.135527	-0.461949	0.644118	0.795245	NoSig
TULP3	3574.53	0.45996	0.132099	3.48195	0.00049778	0.00525793	NoSig
SYNJ2	670.884	-1.06119	0.266359	-3.98407	6.77453e-05	0.00110117	Down
ADCY2	190.492	-0.988466	0.43124	-2.29215	0.0218972	0.0886406	NoSig
PPP2R5C	4033.92	-0.257419	0.0634125	-4.05944	4.91908e-05	0.000852174	NoSig
PMS2P1	319.181	0.0185372	0.0807976	0.229428	0.818537	0.905631	NoSig
RBFOX1	8.07377	-1.22141	0.667261	-1.83048	0.0671779	0.193302	NoSig
GNB1	13219.6	-0.111701	0.106945	-1.04448	0.296265	0.502502	NoSig
HOXA9	1.06122	2.72456	0.849559	3.20702	0.00134116	0.0112471	Up
EDN1	11.7296	-0.310935	0.246528	-1.26126	0.207216	0.402808	NoSig
MLLT10	853.955	-0.0483444	0.130448	-0.370604	0.710933	0.840599	NoSig
ZCWPW1	328.246	0.410199	0.157436	2.60549	0.00917428	0.0471965	NoSig
ADCYAP1R1	5.95437	-0.779079	0.446156	-1.7462	0.080776	0.220444	NoSig
FGF20	1.83964	-0.92936	0.396745	-2.34246	0.019157	0.0808082	NoSig
P2RY10	7.49555	-2.34173	0.5793	-4.04234	5.29204e-05	0.00089804	Down
ITM2A	230.795	-0.332581	0.256276	-1.29774	0.194376	0.387493	NoSig
NRDC	4206.95	-0.509735	0.120127	-4.2433	2.2026e-05	0.000449531	NoSig
VDAC3	2850.36	-0.342661	0.128348	-2.66978	0.00759018	0.0409147	NoSig
PCM1	2695.27	-0.130502	0.182724	-0.714204	0.475101	0.666903	NoSig
TNRC6C	950.912	-0.216874	0.0908756	-2.38649	0.0170102	0.0740687	NoSig
CBFA2T2	1443.75	-0.115817	0.0676545	-1.7119	0.0869159	0.231638	NoSig
BRINP1	12.4925	-0.992548	0.37144	-2.67216	0.0075364	0.0406728	NoSig
ITCH	1053.82	-0.286461	0.15132	-1.89308	0.0583467	0.17592	NoSig
PKD2L2	6.71759	-0.477986	0.243981	-1.95911	0.0500999	0.158342	NoSig
TP53INP2	2507.63	-0.429644	0.149818	-2.86777	0.00413375	0.0264593	NoSig
SDF4	6850.25	0.026687	0.120537	0.221401	0.82478	0.908795	NoSig
MYH7B	78.2313	0.067768	0.171814	0.394427	0.693266	0.829526	NoSig
BPIFB2	0.268265	0.627606	0.845171	0.742579	0.457737	NA	NoSig
TP73	34.5922	-0.514182	0.229166	-2.2437	0.0248514	0.0969457	NoSig
TOLLIP	7544.21	0.0978542	0.119353	0.819874	0.412288	0.613671	NoSig
UBE2D4	1003.32	-0.0600294	0.109004	-0.550708	0.581834	0.749941	NoSig
CLUL1	115.862	-0.0261711	0.324269	-0.080708	0.935674	0.968438	NoSig
RUNX1T1	93.0991	-1.25087	0.332751	-3.75917	0.000170475	0.00226482	Down
CDH17	5.06777	-0.794136	0.462942	-1.71541	0.0862702	0.230343	NoSig
THOC1	514.709	-0.259335	0.17264	-1.50217	0.133052	0.305181	NoSig
FKBP7	613.574	-0.473383	0.133392	-3.54881	0.000386982	0.00430681	NoSig
OSBPL6	62.8864	-1.13635	0.253522	-4.48226	7.38551e-06	0.000183892	Down
SLC1A3	279.56	-0.677691	0.387388	-1.74939	0.0802243	0.219266	NoSig
XRCC5	14446.6	-0.188171	0.0830429	-2.26595	0.0234542	0.0928977	NoSig
LXN	274.211	0.0402906	0.124574	0.323427	0.746372	0.862031	NoSig
SP140	31.1232	-1.56426	0.309285	-5.05766	4.24426e-07	1.87796e-05	Down
MKNK1	968.705	-0.0914381	0.105265	-0.86865	0.385038	0.588856	NoSig
TNS1	17595.6	-0.145933	0.188707	-0.773333	0.439325	0.636887	NoSig
REXO1	2310	0.286925	0.121705	2.35755	0.0183959	0.0784318	NoSig
SAR1A	3763.59	-0.204616	0.0821512	-2.49072	0.0127484	0.0603885	NoSig
CDC14A	109.671	-0.0815513	0.211581	-0.385437	0.699914	0.833403	NoSig
RAPGEF3	958.527	1.94191	0.326555	5.94665	2.73685e-09	3.35222e-07	Up
CEACAM1	690.181	0.378647	0.266235	1.42223	0.15496	0.335087	NoSig
SENP1	482.182	-0.0354677	0.0922935	-0.384293	0.700761	0.833905	NoSig
DUSP13	0.181661	0.380645	1.07658	0.353567	0.723663	NA	NoSig
CIC	9530.57	-0.00926133	0.143579	-0.0645033	0.948569	0.975176	NoSig
LIPE	456.384	0.698035	0.172623	4.0437	5.26139e-05	0.000893947	NoSig
FDFT1	13169.1	0.738267	0.202128	3.65246	0.000259736	0.0031408	NoSig
PAFAH1B3	2154.56	0.104536	0.182583	0.57254	0.566956	0.739156	NoSig
OPHN1	172.253	0.157667	0.148759	1.05988	0.289198	0.495432	NoSig
AFM	0.0309628	0.065977	2.9212	0.0225855	0.981981	NA	NoSig
KIF22	1690.93	0.247979	0.114661	2.16272	0.0305626	0.111986	NoSig
SCGN	1.52386	-1.05134	0.742807	-1.41537	0.156961	0.33776	NoSig
CARMIL1	738.762	0.909117	0.19354	4.69732	2.63598e-06	8.0667e-05	NoSig
PGM1	1024.51	-0.0910502	0.253721	-0.35886	0.7197	0.845951	NoSig
DDX1	3804.81	-0.0694917	0.12817	-0.542185	0.587691	0.75456	NoSig
DNM2	8076.89	-0.106914	0.116515	-0.917595	0.358831	0.565218	NoSig
EPB41L2	1342.09	-0.655478	0.157557	-4.16027	3.17875e-05	0.000595913	NoSig
RIMS1	2.96227	-0.798897	0.551481	-1.44864	0.147438	0.324979	NoSig
MOXD1	80.7839	-0.478739	0.377782	-1.26724	0.20507	0.399905	NoSig
STX7	7919.18	-0.260277	0.127297	-2.04464	0.0408904	0.137417	NoSig
RABL2B	478.24	0.340102	0.0889131	3.82511	0.000130713	0.00182752	NoSig
KEAP1	2865.06	0.0206968	0.0889168	0.232766	0.815943	0.904161	NoSig
DDX43	63.883	0.542542	0.782429	0.693407	0.488054	0.677443	NoSig
PTPRH	328.122	-0.192655	0.200465	-0.961043	0.336531	0.543714	NoSig
DCT	852.923	2.38295	0.399806	5.96027	2.51814e-09	3.14929e-07	Up
SLC35C2	4716.6	0.235969	0.142778	1.6527	0.0983925	0.252022	NoSig
CRYBG3	147.212	-0.501906	0.190202	-2.63881	0.00831969	0.043851	NoSig
EPHA6	0.698715	-1.13656	0.631066	-1.80102	0.0716995	0.202431	NoSig
SCTR	0.926624	-0.803575	0.57516	-1.39713	0.162374	0.345041	NoSig
RFX3	206.001	-0.129124	0.163067	-0.791847	0.42845	0.62789	NoSig
RIF1	1079.21	-0.12001	0.161669	-0.742318	0.457895	0.652842	NoSig
RAB21	1496.96	-0.0616385	0.0937932	-0.657175	0.511069	0.696331	NoSig
SLC4A4	73.1656	-0.748249	0.341173	-2.19317	0.0282954	0.105915	NoSig
SMARCA2	4389.28	-0.122202	0.08861	-1.3791	0.167864	0.352464	NoSig
RDH8	15.3908	-1.05877	0.554901	-1.90803	0.0563872	0.171532	NoSig
SESN1	1315.05	-0.106651	0.170484	-0.625579	0.531591	0.711124	NoSig
MID2	87.9685	0.678666	0.347721	1.95176	0.0509672	0.160214	NoSig
PIH1D3	0.069199	0.0659847	1.61121	0.0409535	0.967333	NA	NoSig
COL5A3	318.3	-1.07973	0.255565	-4.22488	2.39071e-05	0.000478299	Down
SRCAP	7631.45	0.191815	0.112775	1.70086	0.0889698	0.23503	NoSig
PUM3	1821.29	-0.332001	0.181111	-1.83314	0.066782	0.192516	NoSig
CPB2	11.084	1.42794	0.439351	3.2501	0.00115363	0.0100301	Up
CHRNA3	116.944	-1.02296	0.453823	-2.25411	0.0241894	0.0951492	NoSig
KCNN2	115.536	1.6433	0.298408	5.50689	3.6522e-08	2.73306e-06	Up
CNOT4	787.207	-0.237049	0.0633762	-3.74035	0.000183766	0.00241229	NoSig
PSEN1	3586.59	-0.306949	0.0707227	-4.34017	1.42372e-05	0.000313207	NoSig
CPOX	457.468	0.190667	0.129372	1.47379	0.140537	0.31561	NoSig
CLDND1	1105.78	0.222668	0.108475	2.05272	0.0401001	0.135426	NoSig
MOK	1669.64	0.642743	0.22876	2.80968	0.00495908	0.0300829	NoSig
HSP90AA1	37960.7	-0.217596	0.14718	-1.47843	0.139292	0.313972	NoSig
RBL1	217.43	-0.315604	0.146168	-2.15919	0.0308355	0.112667	NoSig
DLGAP4	6792.85	0.00720373	0.151101	0.0476748	0.961975	0.982055	NoSig
IGSF9B	28.8568	0.0497223	0.232391	0.213959	0.830579	0.912248	NoSig
CFHR2	0	NA	NA	NA	NA	NA	NA
CROCCP3	83.0613	-0.159487	0.223871	-0.712405	0.476214	0.667811	NoSig
NDC80	93.328	-0.221904	0.250725	-0.885051	0.376129	0.580842	NoSig
AP4E1	245.365	-0.151407	0.147179	-1.02873	0.303609	0.510908	NoSig
RSBN1	478.5	0.00307215	0.134963	0.0227629	0.981839	0.991274	NoSig
MAGI3	166.627	-0.359931	0.19529	-1.84306	0.0653203	0.189579	NoSig
CXCL2	5.1759	-0.106012	0.36619	-0.289501	0.772198	0.878454	NoSig
AFP	0.144424	-0.0782839	1.50626	-0.0519725	0.958551	NA	NoSig
COL4A4	44.1112	-0.694064	0.27428	-2.5305	0.0113901	0.0555885	NoSig
TCF7	970.047	0.0939944	0.145654	0.645327	0.518715	0.702001	NoSig
OSTM1	6649.14	0.10905	0.207735	0.52495	0.599618	0.763396	NoSig
CDH7	18.2197	2.42184	0.442421	5.47407	4.39809e-08	3.15338e-06	Up
IMPG2	27.0967	-2.06464	0.489629	-4.21674	2.47859e-05	0.000492286	Down
PCNP	2393.53	0.432039	0.179021	2.41334	0.0158071	0.0705	NoSig
EXD2	1053.38	-0.0974582	0.0663548	-1.46874	0.141902	0.317288	NoSig
ARG2	92.0376	-0.66677	0.171787	-3.88138	0.000103866	0.00153606	NoSig
MEF2C	2407.57	0.0165039	0.130826	0.126152	0.899612	0.949901	NoSig
PTPRC	194.894	-1.68754	0.373774	-4.51488	6.33527e-06	0.000162621	Down
CACNA1S	2.69006	-1.13511	0.583793	-1.94437	0.0518507	0.162136	NoSig
PKP1	100.954	0.161806	0.285506	0.566735	0.570894	0.741721	NoSig
UBA5	545.706	0.183816	0.137015	1.34158	0.179734	0.367833	NoSig
STK17B	121.971	-1.2269	0.246867	-4.96988	6.69941e-07	2.70634e-05	Down
CDC14B	985.849	-0.0593377	0.121853	-0.486963	0.626284	0.783184	NoSig
ZNF510	284.905	-0.244294	0.163435	-1.49474	0.134982	0.307956	NoSig
LRP2	382.758	-0.428997	0.470222	-0.912328	0.361596	0.56742	NoSig
ZNF506	449.201	0.261454	0.10172	2.57033	0.0101602	0.0509482	NoSig
JMJD4	1041.3	-0.00675243	0.131965	-0.0511683	0.959191	0.980608	NoSig
DUSP12	395.15	0.0414159	0.100273	0.413033	0.679583	0.820104	NoSig
AACS	1100.43	-0.256417	0.108204	-2.36977	0.0177992	0.0764952	NoSig
DELE1	4548.97	0.119004	0.126281	0.942377	0.346	0.552375	NoSig
SLC13A1	0.0370337	0.138111	2.9212	0.0472787	0.962291	NA	NoSig
CADPS2	739.59	0.370649	0.26737	1.38628	0.165661	0.349372	NoSig
PCDHB4	27.5574	1.29567	0.337159	3.84292	0.000121579	0.00173046	Up
PCDHA6	7.58932	2.4979	0.67081	3.72371	0.000196317	0.00254349	Up
PCDHGA2	102.241	0.310557	0.348586	0.890905	0.37298	0.577805	NoSig
HSPB11	495.543	-0.185073	0.0991191	-1.86718	0.0618761	0.183055	NoSig
PHLPP1	5809.97	-0.17714	0.123204	-1.43778	0.150497	0.329078	NoSig
ATP8B1	296.306	-0.726728	0.244145	-2.97662	0.00291444	0.0202449	NoSig
IL12RB2	617.289	2.12676	0.357744	5.94491	2.76608e-09	3.35222e-07	Up
SMARCD3	1414.59	-0.306486	0.146522	-2.09174	0.0364618	0.126722	NoSig
WDR70	687.624	-0.154352	0.0845716	-1.8251	0.0679855	0.195	NoSig
FYB1	200.703	-0.525738	0.331787	-1.58456	0.113066	0.275512	NoSig
MPP4	79.7197	2.01559	0.337237	5.97676	2.27616e-09	2.94065e-07	Up
STRADB	3245.61	-0.0100667	0.146927	-0.068515	0.945376	0.973796	NoSig
BZW1	1736.49	-0.0221497	0.111624	-0.198431	0.842708	0.919449	NoSig
PGR	6.7033	-2.23217	0.393343	-5.67488	1.38786e-08	1.26976e-06	Down
C1QTNF3	88.9553	-0.507757	0.277659	-1.82871	0.0674437	0.193872	NoSig
ME2	888.508	-0.543677	0.143075	-3.79996	0.000144722	0.00197991	NoSig
C5orf22	3098.99	-0.0246053	0.16732	-0.147055	0.883089	0.942041	NoSig
CCNT2	871.496	-0.202152	0.200662	-1.00743	0.313729	0.520834	NoSig
FAM135A	189.185	-0.15184	0.197695	-0.768052	0.442456	0.639374	NoSig
COL19A1	8.84682	1.23313	0.463653	2.65961	0.00782322	0.0417776	Up
EPB41L3	1751.71	0.403838	0.284271	1.42061	0.15543	0.33574	NoSig
COBLL1	450.396	0.817032	0.304952	2.67921	0.0073796	0.0401111	NoSig
DLG3	265.901	-0.324729	0.224088	-1.44912	0.147305	0.324815	NoSig
KCNK2	434.19	2.2753	0.364118	6.24878	4.13663e-10	6.86656e-08	Up
SERTAD4	34.8827	-0.316188	0.250555	-1.26195	0.206967	0.402607	NoSig
TRAF5	602.952	-0.457916	0.213484	-2.14496	0.031956	0.115635	NoSig
MRPL22	826.716	-0.28685	0.110561	-2.59448	0.00947329	0.0483714	NoSig
GEMIN5	1188.36	0.128514	0.0806467	1.59354	0.111039	0.271952	NoSig
OPRK1	4.74844	0.655137	0.536486	1.22116	0.222024	0.419864	NoSig
NFE2L1	19889.4	0.48462	0.125883	3.84976	0.000118233	0.00169776	NoSig
SEMA5B	41.5097	-0.75146	0.283818	-2.64768	0.0081045	0.0429747	NoSig
GSK3B	1974.03	0.163162	0.0780954	2.08927	0.0366835	0.127164	NoSig
ITGB5	7749.85	0.111309	0.123774	0.899298	0.368494	0.573676	NoSig
ERC1	3515.6	0.288847	0.137632	2.09869	0.0358441	0.125285	NoSig
XPO1	3672.34	-0.159339	0.170483	-0.934636	0.349976	0.556262	NoSig
LINC01587	3.71207	-0.162127	0.42108	-0.385026	0.700218	0.833657	NoSig
RNF13	1267.36	0.233255	0.153025	1.52429	0.127436	0.297455	NoSig
TRPM3	72.8046	-1.19102	0.415248	-2.86823	0.0041278	0.0264437	Down
PALB2	595.836	0.171305	0.101812	1.68256	0.0924597	0.241478	NoSig
DOP1A	405.457	-0.0110805	0.191619	-0.0578254	0.953888	0.977818	NoSig
LYRM2	1216.79	-0.303288	0.159681	-1.89934	0.0575203	0.174176	NoSig
BCKDHB	541.425	0.152171	0.158514	0.959986	0.337062	0.544136	NoSig
KAT6A	1803.17	-0.0483269	0.14368	-0.336351	0.736606	0.856248	NoSig
TUT7	815.721	0.193084	0.152825	1.26343	0.206435	0.401908	NoSig
ULK2	1212.18	-0.307417	0.111481	-2.75758	0.00582302	0.0338182	NoSig
GRHL2	1.0935	-1.16208	0.626448	-1.85503	0.0635915	0.186378	NoSig
TNPO1	3898.15	-0.239251	0.136287	-1.75549	0.0791763	0.217509	NoSig
PLOD1	12366.4	0.335004	0.162659	2.05955	0.0394416	0.133812	NoSig
P2RX5	10.0492	0.285219	0.416284	0.685155	0.493246	0.681817	NoSig
ITGAE	390.703	0.0470076	0.117021	0.401703	0.687902	0.82583	NoSig
DIS3	1138.97	-0.0686341	0.139529	-0.4919	0.62279	0.780532	NoSig
PIBF1	233.033	-0.0959036	0.236258	-0.405928	0.684795	0.823564	NoSig
TDRD3	3413.68	-0.618485	0.328564	-1.88239	0.0597829	0.178833	NoSig
AC000061.1	0	NA	NA	NA	NA	NA	NA
NUFIP1	385.016	0.162131	0.0838914	1.93263	0.0532821	0.165054	NoSig
PDS5B	818.642	-0.379091	0.164704	-2.30166	0.0213546	0.0871396	NoSig
OXCT1	1902.03	-0.491363	0.174403	-2.81739	0.00484154	0.0295531	NoSig
RRAGB	537.203	0.204423	0.12123	1.68623	0.091751	0.240131	NoSig
EPYC	0.726003	-0.455143	0.969385	-0.469517	0.6387	0.791662	NoSig
CYLD	762.221	-0.329161	0.158089	-2.08213	0.0373307	0.12874	NoSig
SLC27A5	477.33	0.611884	0.181804	3.36562	0.00076372	0.00732406	NoSig
ZNF324	513.507	0.333969	0.10683	3.12617	0.00177097	0.0139543	NoSig
ZNF671	392.863	0.519036	0.180881	2.8695	0.00411126	0.0263646	NoSig
ZNF416	350.022	0.450818	0.0984493	4.57919	4.66779e-06	0.000127846	NoSig
ZNF586	191.104	0.284421	0.104942	2.71027	0.00672287	0.0375016	NoSig
ZNF446	606.191	0.125642	0.119045	1.05542	0.291232	0.497473	NoSig
ZNF264	874.737	0.100038	0.0744163	1.3443	0.178852	0.366742	NoSig
RPS5	56635.7	0.301635	0.172025	1.75344	0.0795261	0.218076	NoSig
FAT1	6248.92	-0.177732	0.144074	-1.23361	0.217346	0.414981	NoSig
YTHDC1	2360.44	-0.000228192	0.0810346	-0.00281598	0.997753	0.999066	NoSig
CHMP2B	502.96	0.231569	0.142993	1.61944	0.105352	0.26282	NoSig
SMAP2	1788.19	-0.137502	0.155324	-0.885258	0.376018	0.580735	NoSig
PPIE	1838.88	-0.0492158	0.106601	-0.461682	0.644309	0.795373	NoSig
ZMPSTE24	2034.29	-0.263481	0.122965	-2.14274	0.0321341	0.116076	NoSig
STARD7	8367.91	-0.192843	0.0657208	-2.93427	0.00334332	0.0223778	NoSig
NOA1	2482.09	0.279971	0.135637	2.06413	0.0390056	0.132893	NoSig
REST	686.845	0.0474377	0.147563	0.321474	0.747851	0.862779	NoSig
HAL	1.79602	-0.163744	0.385832	-0.424392	0.67128	0.814716	NoSig
SSH1	3093.35	-0.0967315	0.0813807	-1.18863	0.234585	0.434812	NoSig
GSTP1	46514.3	0.901349	0.294623	3.05933	0.00221834	0.0164879	NoSig
APLP2	22505.2	-0.382037	0.138446	-2.75947	0.00578953	0.0336753	NoSig
FAM234B	566.483	-0.0311831	0.141391	-0.220545	0.825447	0.909273	NoSig
SLCO1A2	12.1585	-0.228574	0.414955	-0.550839	0.581744	0.749877	NoSig
WBP11	5212.56	-0.00922367	0.0777692	-0.118603	0.90559	0.952943	NoSig
EIF3I	9958.99	-0.0933069	0.114876	-0.81224	0.416654	0.617518	NoSig
NKAIN1	301.841	-0.0639353	0.305873	-0.209026	0.834428	0.914752	NoSig
COL16A1	1137.8	-0.381063	0.222782	-1.71047	0.0871783	0.232043	NoSig
TXLNA	5007.5	-0.0529811	0.11463	-0.462191	0.643944	0.795168	NoSig
APOB	14.9836	0.947635	0.504595	1.87801	0.0603799	0.180068	NoSig
NCOA1	1517.2	-0.139793	0.108957	-1.28301	0.19949	0.39362	NoSig
AGBL5	2189.91	0.443286	0.128006	3.463	0.000534182	0.00557148	NoSig
EFR3B	1865.86	-0.091672	0.15381	-0.596008	0.55117	0.726188	NoSig
KIF3C	1180.12	-0.0228786	0.189276	-0.120874	0.903791	0.951978	NoSig
RAB10	3587.14	-0.174595	0.100821	-1.73172	0.0833227	0.22504	NoSig
GCKR	0.252033	-0.212261	1.01892	-0.20832	0.834979	NA	NoSig
HADHA	14847.8	0.0381232	0.0955457	0.399005	0.68989	0.826703	NoSig
MAPRE3	768.266	0.220933	0.188917	1.16947	0.242214	0.443712	NoSig
CAD	6288.18	0.17559	0.157402	1.11555	0.264615	0.469491	NoSig
CD59	27598.3	-0.155625	0.115854	-1.34329	0.179178	0.367136	NoSig
CD82	4318.14	0.556134	0.339721	1.63703	0.101624	0.256959	NoSig
BCORL1	1168.52	0.261906	0.125616	2.08498	0.037071	0.128038	NoSig
ATRX	1396.58	-0.271489	0.142285	-1.90806	0.0563834	0.171532	NoSig
AK6	473.179	-0.220717	0.0996791	-2.21427	0.0268099	0.102085	NoSig
FCN1	61.1346	0.186443	0.368879	0.505433	0.613255	0.773245	NoSig
MYNN	244.988	0.257392	0.162286	1.58604	0.112731	0.274892	NoSig
MECOM	37.156	-0.360809	0.206779	-1.7449	0.0810022	0.220788	NoSig
SCAMP1	929.363	-0.127678	0.139238	-0.916979	0.359153	0.565531	NoSig
PREP	2155.27	0.143669	0.12173	1.18023	0.237909	0.438675	NoSig
HACE1	228.92	-0.14199	0.209105	-0.679039	0.497113	0.684915	NoSig
SEH1L	1385.96	0.0119237	0.101895	0.117019	0.906845	0.953214	NoSig
WDR47	349.346	-0.226622	0.136977	-1.65445	0.0980359	0.251556	NoSig
WDFY1	7447.36	0.229742	0.150063	1.53097	0.125776	0.295039	NoSig
OVGP1	30.5311	0.13221	0.243834	0.542212	0.587672	0.75456	NoSig
SLC25A24	602.717	0.0613371	0.189833	0.32311	0.746612	0.86217	NoSig
MAP3K4	533.788	-0.348355	0.136149	-2.55863	0.0105085	0.0522551	NoSig
PILRA	133.499	-0.349972	0.222176	-1.5752	0.11521	0.279057	NoSig
IGSF9	13.8994	-0.289052	0.386376	-0.748111	0.454393	0.650127	NoSig
ABCB1	46.8885	-0.290364	0.219805	-1.32101	0.186499	0.376898	NoSig
ZNF213	1903.35	0.149183	0.171354	0.87061	0.383967	0.587841	NoSig
AKR1B1	5809.4	0.192952	0.125486	1.53764	0.124138	0.292877	NoSig
CPNE3	3376.9	-0.202366	0.162469	-1.24556	0.212924	0.409404	NoSig
RRN3	1520.49	-0.304094	0.0883108	-3.44345	0.000574333	0.00589689	NoSig
CTTN	9491.65	-0.0803499	0.0790268	-1.01674	0.309276	0.516487	NoSig
WNT11	157.899	1.18679	0.221539	5.357	8.46143e-08	5.3492e-06	Up
MTIF2	1484.43	0.106027	0.114487	0.926103	0.354393	0.56084	NoSig
DDHD2	1732.02	0.102273	0.151941	0.673108	0.500879	0.687992	NoSig
TTC39A	81.628	0.408167	0.282389	1.44541	0.148343	0.326212	NoSig
EPS15	3126.39	-0.386734	0.139094	-2.78038	0.00542948	0.0321531	NoSig
ORC1	84.8963	0.000953584	0.147198	0.00647825	0.994831	0.997677	NoSig
MGST2	3319.44	-0.765149	0.186971	-4.09233	4.27052e-05	0.000761988	NoSig
CHERP	3102.1	0.248633	0.0922511	2.69517	0.00703522	0.038817	NoSig
ATG16L1	1019.87	0.014951	0.0766761	0.19499	0.845401	0.92103	NoSig
USP40	1805.7	-0.0173424	0.0904703	-0.191692	0.847983	0.922193	NoSig
POMGNT1	6651.09	0.306173	0.149563	2.04713	0.0406457	0.136813	NoSig
RAD54L	58.5643	0.0792899	0.199898	0.396653	0.691624	0.828176	NoSig
MAST2	1628.72	-0.351463	0.127205	-2.76296	0.00572794	0.0334148	NoSig
DNAJA1	5440.17	-0.150734	0.112003	-1.34581	0.178365	0.366322	NoSig
B4GALT1	1935.93	-0.354316	0.128092	-2.7661	0.00567309	0.033208	NoSig
CHMP5	1593.81	-0.105523	0.110282	-0.956847	0.338645	0.545785	NoSig
NFX1	2196.42	-0.0702782	0.0751439	-0.935249	0.34966	0.555916	NoSig
AQP6	5.42746	1.0624	0.529494	2.00645	0.044808	0.14659	NoSig
DIMT1	1093.05	-0.135259	0.0919301	-1.47133	0.141202	0.31639	NoSig
IPO11	550.134	-0.0587893	0.133759	-0.439518	0.660286	0.807131	NoSig
FOLH1	42.0535	-0.513113	0.194799	-2.63406	0.00843709	0.0443055	NoSig
EIF2AK1	7132.61	0.0819977	0.101144	0.810703	0.417536	0.618123	NoSig
NME8	2.28167	-1.02334	0.461935	-2.21533	0.0267375	0.10188	NoSig
EPDR1	494.042	-1.00908	0.238698	-4.22743	2.36373e-05	0.000473593	Down
SNX10	276.549	0.317724	0.328587	0.966941	0.333574	0.540734	NoSig
SEPHS1	1897.24	0.207657	0.0771043	2.6932	0.00707704	0.0389496	NoSig
MRPL28	4640.92	0.131592	0.154112	0.853871	0.393176	0.596274	NoSig
HBQ1	16.9788	1.22231	0.342038	3.57361	0.000352094	0.00399979	Up
ITPKC	1391.91	0.364457	0.112377	3.24315	0.00118216	0.0102269	NoSig
CEACAM6	3.80828	1.51203	0.86979	1.73839	0.0821426	0.223018	NoSig
FAT2	60.0506	0.716652	0.313953	2.28267	0.0224497	0.0900254	NoSig
RBM22	1725.89	-0.0498552	0.0688665	-0.72394	0.469102	0.661633	NoSig
TMED2	6610.71	-0.148427	0.0811789	-1.8284	0.0674899	0.193944	NoSig
ERO1B	489.814	-0.357457	0.173043	-2.06571	0.0388554	0.132494	NoSig
ZFAND6	1583.84	-0.212115	0.0998012	-2.12538	0.033555	0.119531	NoSig
HSD17B2	65.0343	0.37446	0.674128	0.555473	0.578571	0.747334	NoSig
TXLNG	620.474	-0.218971	0.13314	-1.64467	0.100038	0.254666	NoSig
PPEF1	23.6816	-0.585724	0.29567	-1.981	0.0475907	0.15306	NoSig
LAT2	123.271	-0.589184	0.22215	-2.65219	0.00799705	0.0424973	NoSig
HUWE1	14080.1	0.137193	0.109824	1.24921	0.21159	0.40789	NoSig
ZW10	564.166	0.0152708	0.0820712	0.186068	0.852391	0.924563	NoSig
ALG9	490.194	0.434543	0.127748	3.40158	0.000669983	0.00663419	NoSig
MYBPC2	10.061	0.302518	0.301287	1.00408	0.315338	0.522809	NoSig
NOX4	82.9691	-0.158604	0.304078	-0.521591	0.601955	0.765021	NoSig
ACOX3	987.956	-0.0511252	0.12358	-0.413703	0.679092	0.819946	NoSig
MTMR2	2014.15	-0.0614436	0.0869608	-0.706566	0.479836	0.670964	NoSig
PPP1R15A	3842.08	0.165943	0.130189	1.27463	0.202439	0.396638	NoSig
HSD17B14	7058.05	-0.269189	0.182573	-1.47441	0.14037	0.315445	NoSig
TRIP6	10712.6	0.225809	0.136669	1.65223	0.0984869	0.252181	NoSig
ACHE	128.092	-0.497823	0.280679	-1.77364	0.076123	0.211524	NoSig
FTL	119453	-0.185952	0.16635	-1.11784	0.263637	0.468272	NoSig
SRRT	5000.89	-0.0469239	0.08864	-0.529376	0.596545	0.760792	NoSig
BAX	4308.07	-0.452241	0.150983	-2.9953	0.00274174	0.0193743	NoSig
NLK	1028.95	-0.427455	0.11277	-3.7905	0.000150345	0.00203953	NoSig
PIGS	2580.26	0.124015	0.13921	0.890842	0.373014	0.577805	NoSig
ADAMTS2	790.98	-0.0564697	0.394504	-0.143141	0.886179	0.943875	NoSig
TMPRSS11E	0.102722	0.138116	2.17414	0.0635269	0.949347	NA	NoSig
ATXN7L3	3503.2	0.00707107	0.103861	0.0680822	0.94572	0.973796	NoSig
PGS1	1240.27	0.301157	0.101851	2.95685	0.00310804	0.0211862	NoSig
PSMC5	7539.85	-0.148936	0.117957	-1.26262	0.206725	0.402301	NoSig
UIMC1	544.135	0.1076	0.0968125	1.11142	0.266387	0.471201	NoSig
CETP	225.748	-0.13576	0.344019	-0.394629	0.693117	0.829384	NoSig
MMP2	4053.48	-0.0433167	0.368367	-0.117591	0.906392	0.95318	NoSig
MT3	13.1265	-1.10758	0.459223	-2.41185	0.0158716	0.0706801	NoSig
LPCAT2	208.769	-0.0902571	0.228971	-0.394186	0.693444	0.829624	NoSig
GNAO1	1133.04	0.720361	0.280424	2.56883	0.0102043	0.0510664	NoSig
OGFOD1	1513.24	-0.037738	0.0932401	-0.40474	0.685669	0.824245	NoSig
SH3BP2	3268.52	-0.0515158	0.102741	-0.501415	0.616079	0.775384	NoSig
NOP14	2821.71	0.110624	0.0937268	1.18028	0.237888	0.438666	NoSig
ADD1	12389.4	0.170014	0.114627	1.48319	0.138023	0.312231	NoSig
L2HGDH	167.57	0.0051611	0.179974	0.0286768	0.977122	0.989111	NoSig
TXNDC16	303.655	0.184925	0.196572	0.940747	0.346835	0.553033	NoSig
RTRAF	5759.7	-0.0166102	0.0836901	-0.198473	0.842675	0.919449	NoSig
NID2	118.796	-0.136683	0.219923	-0.621507	0.534266	0.712936	NoSig
GMCL1	629.234	-0.410139	0.163673	-2.50584	0.012216	0.0584338	NoSig
SF3B2	15325.5	0.109715	0.11437	0.959302	0.337407	0.544499	NoSig
KLHL42	690.459	-0.262205	0.127187	-2.06157	0.0392489	0.133489	NoSig
GNAS	126805	-0.173759	0.107403	-1.61782	0.105701	0.263405	NoSig
DNM1L	1941.88	-0.184978	0.143804	-1.28632	0.198332	0.392353	NoSig
PTHLH	20.7591	-1.10248	0.438574	-2.51378	0.0119445	0.0576167	NoSig
PHACTR3	143.992	0.358838	0.411996	0.870975	0.383768	0.587627	NoSig
ERGIC2	791.662	-0.326166	0.139101	-2.34482	0.0190363	0.0805354	NoSig
TFAP2C	1892.14	-0.453327	0.168309	-2.69342	0.00707224	0.038935	NoSig
AURKA	319.114	-0.0249461	0.170862	-0.146001	0.88392	0.942378	NoSig
CASS4	11.454	-0.787169	0.296216	-2.65742	0.00787421	0.0419585	NoSig
PIR	9284.59	-0.326788	0.210601	-1.55169	0.120736	0.28775	NoSig
AAMDC	1136.65	0.304673	0.152516	1.99765	0.0457545	0.148875	NoSig
RFX2	270.344	-0.231267	0.13934	-1.65972	0.09697	0.24971	NoSig
METTL2A	517.739	-0.188937	0.102656	-1.84048	0.0656984	0.190394	NoSig
SULT2B1	34.6112	-0.67367	0.32044	-2.10233	0.0355245	0.124502	NoSig
ALG6	606.86	-0.140619	0.111946	-1.25613	0.209067	0.404932	NoSig
CNOT3	2671.52	0.0518901	0.119281	0.435024	0.663545	0.809259	NoSig
GP6	6.82932	0.143393	0.272426	0.526354	0.598642	0.762427	NoSig
PTPN4	462.112	0.282857	0.145676	1.94169	0.0521751	0.16287	NoSig
DDX18	1908.55	0.0202283	0.103239	0.195936	0.84466	0.920583	NoSig
KHSRP	16319.6	0.217378	0.131778	1.64958	0.0990283	0.253119	NoSig
GNA11	5301.82	0.328043	0.121885	2.69141	0.00711514	0.0390848	NoSig
ASAP3	730.165	-0.313307	0.203168	-1.54211	0.123047	0.291169	NoSig
EDEM2	1034.77	-0.0414212	0.097898	-0.423106	0.672218	0.81524	NoSig
DNMT3B	115.512	-0.0108358	0.130229	-0.083206	0.933688	0.967054	NoSig
REM1	33.9025	-0.376566	0.258812	-1.45498	0.145675	0.322676	NoSig
TPX2	876.335	-0.0134433	0.211018	-0.0637069	0.949204	0.975433	NoSig
FER1L4	44.5846	0.0329409	0.318143	0.103541	0.917534	0.958953	NoSig
PDRG1	915.363	-0.05852	0.0844562	-0.692904	0.48837	0.67773	NoSig
EPB41L1	2250.84	-0.58733	0.170122	-3.45241	0.000555598	0.00574454	NoSig
SLC15A1	1.32726	-0.182307	0.503332	-0.3622	0.717203	0.844372	NoSig
DOCK9	684.355	-0.27912	0.11279	-2.47469	0.0133352	0.0624791	NoSig
ANKRD10	1871.97	-0.392747	0.197946	-1.98411	0.0472437	0.152398	NoSig
TGDS	283.922	0.191884	0.198331	0.967495	0.333296	0.540477	NoSig
DOCK3	40.651	-1.67741	0.378646	-4.43003	9.42182e-06	0.000224006	Down
C3orf18	552.072	0.0222451	0.128871	0.172616	0.862954	0.931262	NoSig
COQ9	2565.91	-0.289055	0.098102	-2.94648	0.00321415	0.0217418	NoSig
TMEM40	29.9971	2.72755	0.513536	5.31132	1.08836e-07	6.59835e-06	Up
KIF9	256.164	0.888833	0.15349	5.79082	7.00436e-09	7.41797e-07	NoSig
ARHGAP28	120.073	1.0155	0.255752	3.97066	7.16741e-05	0.001148	Up
CRLS1	1215.77	-0.257733	0.0909166	-2.83483	0.00458507	0.0284055	NoSig
DEFB127	0	NA	NA	NA	NA	NA	NA
PPP1R13B	889.862	0.199437	0.135582	1.47097	0.1413	0.31657	NoSig
ATRN	3743.28	-0.101651	0.0849343	-1.19682	0.231379	0.431085	NoSig
SMOX	1561.35	0.294441	0.165312	1.78112	0.0748933	0.209004	NoSig
SIGLEC1	518.761	-0.505872	0.273478	-1.84977	0.0643462	0.187787	NoSig
FKBP1A	7884.67	-0.113212	0.1397	-0.81039	0.417716	0.618256	NoSig
NSFL1C	4107.57	0.0341827	0.0940638	0.363399	0.716307	0.843783	NoSig
SLC4A11	295.018	-0.400655	0.241294	-1.66044	0.0968251	0.24943	NoSig
C20orf194	1160.13	-0.352167	0.120882	-2.91332	0.00357611	0.0235958	NoSig
ZNF343	421.73	0.132208	0.0882843	1.49753	0.134256	0.306863	NoSig
EBF4	836.933	0.0134381	0.224824	0.0597714	0.952338	0.976986	NoSig
CPXM1	1244.36	1.04228	0.434745	2.39746	0.016509	0.0725785	NoSig
MAVS	7541.26	-0.104667	0.0938933	-1.11474	0.264962	0.469802	NoSig
LZTS3	868.167	0.394711	0.202098	1.95307	0.0508116	0.159871	NoSig
F11	0.793424	-0.230656	0.512363	-0.450181	0.65258	0.801503	NoSig
XRN2	3668.3	-0.256035	0.121574	-2.10599	0.0352049	0.123698	NoSig
KIZ	766.255	0.267962	0.135523	1.97724	0.048014	0.15388	NoSig
DYNLL1	7906.75	-0.174964	0.116814	-1.4978	0.134185	0.306828	NoSig
TESC	507.225	1.00648	0.362588	2.77581	0.00550641	0.0325173	Up
SNX5	3828.02	-0.0387791	0.0811769	-0.47771	0.632856	0.787341	NoSig
RPL6	47842	0.033151	0.134726	0.246063	0.805634	0.898725	NoSig
SIRPG	51.819	-1.47123	0.642301	-2.29056	0.0219888	0.0888931	NoSig
MAPKAPK5	903.71	0.0329157	0.084015	0.391784	0.695218	0.830717	NoSig
P2RX7	7704.04	0.138145	0.181655	0.760484	0.446965	0.643627	NoSig
ESF1	390.037	-0.201045	0.185762	-1.08228	0.27913	0.484972	NoSig
RBBP9	382.839	-0.282525	0.15556	-1.81618	0.0693429	0.197754	NoSig
ANAPC5	4974.66	-0.0143702	0.0522034	-0.275273	0.783107	0.886009	NoSig
SLC23A2	4097.52	-0.433684	0.111684	-3.88313	0.000103118	0.00152665	NoSig
SLC8B1	925.227	-0.193759	0.11022	-1.75794	0.0787585	0.216774	NoSig
TMEM230	5615.68	-0.125235	0.0774078	-1.61786	0.105693	0.263405	NoSig
DZANK1	92.4978	-0.15788	0.139507	-1.1317	0.25776	0.461665	NoSig
KDM2B	1239.77	0.0569213	0.074772	0.761265	0.446499	0.643221	NoSig
CFAP61	211.719	2.05777	0.543274	3.78772	0.000152037	0.00205942	Up
LHX5	0.453254	0.279493	0.612925	0.455998	0.648391	NA	NoSig
TASP1	215.622	0.0729821	0.150157	0.486039	0.626939	0.783691	NoSig
OAS1	650.065	0.191716	0.299905	0.639257	0.522655	0.704429	NoSig
GCN1	7765.43	0.147528	0.118874	1.24104	0.21459	0.411637	NoSig
RPLP0	122990	0.158793	0.148868	1.06667	0.286121	0.492	NoSig
PXN	5783.36	0.165117	0.133911	1.23303	0.217563	0.415193	NoSig
SIRT4	73.6185	0.0667745	0.0985998	0.677227	0.498262	0.685673	NoSig
RPH3A	68.013	2.32396	0.460097	5.05102	4.39467e-07	1.92277e-05	Up
KIF16B	614.224	0.174177	0.140844	1.23667	0.21621	0.413791	NoSig
TRMT6	507.205	0.00518258	0.111883	0.0463215	0.963054	0.982512	NoSig
CHGB	463.562	1.51608	0.436059	3.47678	0.000507465	0.0053437	Up
PEBP1	30026.2	0.154559	0.101546	1.52206	0.127994	0.29825	NoSig
TBX5	2.70929	0.115512	0.594846	0.194188	0.846028	0.921136	NoSig
BRAP	966.853	-0.0749194	0.05866	-1.27718	0.201539	0.39578	NoSig
ERP29	10830.8	0.110761	0.123861	0.89424	0.371193	0.576204	NoSig
NOS1	2.92444	-0.0209481	0.443967	-0.0471839	0.962367	0.982229	NoSig
FUS	14423.4	0.08115	0.091487	0.887011	0.375073	0.579864	NoSig
IGBP1	6410.15	0.243382	0.131587	1.84958	0.0643735	0.187795	NoSig
FXYD5	8391.04	-0.567596	0.251389	-2.25784	0.0239554	0.0943779	NoSig
ZNF302	592.248	-0.0564166	0.17335	-0.32545	0.744841	0.861323	NoSig
GRAMD1A	7868.54	0.218234	0.141385	1.54354	0.122701	0.290699	NoSig
FXYD3	110.661	0.167927	0.44877	0.374193	0.708261	0.83848	NoSig
HEPH	138.721	-0.409688	0.269569	-1.51979	0.128564	0.29892	NoSig
CDIP1	5810.06	0.679296	0.182506	3.72204	0.000197618	0.0025543	NoSig
CMTM1	9.62067	-0.386004	0.267125	-1.44503	0.148449	0.326367	NoSig
KCNH4	8.50891	0.504663	0.239136	2.11036	0.0348274	0.122838	NoSig
GANAB	26473.1	0.0542555	0.148853	0.36449	0.715492	0.843227	NoSig
GMIP	766.676	-0.0660761	0.164351	-0.402042	0.687653	0.82576	NoSig
RBM41	119.106	0.102514	0.192743	0.531867	0.594818	0.759863	NoSig
BIRC5	420.509	0.140197	0.227871	0.615246	0.538392	0.716391	NoSig
LAG3	273.834	-1.97614	0.494028	-4.00007	6.33248e-05	0.00104106	Down
MLF2	9662.8	0.122199	0.129545	0.943294	0.34553	0.552028	NoSig
OTUB2	152.972	0.0858952	0.158302	0.542602	0.587404	0.754297	NoSig
DDX24	8516.87	-0.0201782	0.0856182	-0.235677	0.813683	0.902955	NoSig
ZBTB25	353.9	-0.278383	0.14904	-1.86785	0.0617835	0.18284	NoSig
NECAP1	1063.11	-0.465244	0.0877922	-5.29937	1.16203e-07	6.97955e-06	NoSig
ARHGAP4	730.969	0.258583	0.188107	1.37466	0.169236	0.354048	NoSig
ANKRD24	116.521	-0.424661	0.180539	-2.35218	0.0186637	0.0793511	NoSig
DHX32	1994.42	-0.117411	0.0948845	-1.23741	0.215934	0.41338	NoSig
RCOR1	929.92	-0.092558	0.0950615	-0.973664	0.330223	0.537498	NoSig
GPATCH2L	1107.22	-0.000744393	0.119916	-0.00620765	0.995047	0.997852	NoSig
LTBP4	5674.37	0.406289	0.21723	1.87032	0.0614399	0.182119	NoSig
BLVRB	3924.44	0.141621	0.12205	1.16036	0.245904	0.448232	NoSig
SLC9A1	5511.19	-0.147078	0.181435	-0.810636	0.417575	0.618147	NoSig
SPTLC1	1381.63	-0.142982	0.111993	-1.27671	0.201705	0.395782	NoSig
PAPOLA	4783.69	-0.129923	0.100986	-1.28654	0.198253	0.39231	NoSig
CCNK	499.804	0.00116919	0.0983718	0.0118854	0.990517	0.995679	NoSig
PCBP4	1165.24	0.498281	0.208209	2.39318	0.0167031	0.07316	NoSig
RGS1	314.225	-1.29654	0.477332	-2.71622	0.00660324	0.0370399	Down
YPEL3	4172.1	0.372499	0.175169	2.12651	0.0334605	0.119376	NoSig
MRPS33	2047.72	0.0169219	0.100385	0.16857	0.866135	0.932725	NoSig
NDUFB2	3492.41	-0.157839	0.0856143	-1.84361	0.06524	0.189406	NoSig
NUDC	7304.46	0.134292	0.14645	0.916984	0.359151	0.565531	NoSig
MAEA	3991.28	0.0497509	0.0745378	0.667458	0.50448	0.691101	NoSig
ICAM1	2696.64	-0.20092	0.143285	-1.40223	0.160845	0.343019	NoSig
STRN4	6011.25	0.152065	0.124125	1.22509	0.22054	0.418598	NoSig
IRAK3	26.0653	-0.33138	0.230924	-1.43502	0.151283	0.329851	NoSig
LYZ	878.798	-0.505151	0.43979	-1.14862	0.250712	0.453371	NoSig
SI	0.10977	0.138112	2.86309	0.0482386	0.961526	NA	NoSig
MUL1	2518.75	0.0287629	0.136919	0.210073	0.833611	0.914148	NoSig
TFAP4	1554.09	0.379437	0.10972	3.45823	0.000543746	0.00565186	NoSig
PDCD7	1167.18	0.0126996	0.0717275	0.177053	0.859467	0.928487	NoSig
SPG21	5743.65	-0.0197914	0.103091	-0.19198	0.847758	0.922021	NoSig
FETUB	0.660347	-0.112851	0.518727	-0.217554	0.827777	NA	NoSig
DNAJB11	1810.36	0.332493	0.0868841	3.82686	0.000129786	0.00181734	NoSig
P3H2	73.677	-0.811097	0.289891	-2.79793	0.00514307	0.0309296	NoSig
THPO	3.92504	-0.139852	0.31506	-0.44389	0.657122	0.805096	NoSig
CHRD	74.6307	-0.377474	0.240365	-1.57042	0.116318	0.280862	NoSig
FLT3LG	80.6177	0.22962	0.256435	0.895433	0.370556	0.575695	NoSig
RAB11FIP3	2463.75	-0.2081	0.0994828	-2.09182	0.0364545	0.126722	NoSig
GNPTG	4648.93	-0.309738	0.0965475	-3.20815	0.00133594	0.0112184	NoSig
ZNF268	535.595	-0.103268	0.165968	-0.622215	0.533801	0.712599	NoSig
GOLGA3	3277.26	-0.137243	0.0641138	-2.14061	0.0323056	0.116458	NoSig
PABPC4	17408.3	0.272289	0.152973	1.77997	0.0750801	0.209406	NoSig
CD209	442.232	-1.02528	0.331086	-3.09671	0.00195678	0.0150578	Down
CERS4	5772.3	-0.0580934	0.148801	-0.39041	0.696233	0.831169	NoSig
MCOLN1	3358.34	-0.066584	0.161083	-0.413352	0.679349	0.820041	NoSig
USP48	3213.87	-0.335429	0.144862	-2.31551	0.0205851	0.0851156	NoSig
EFNB1	592.571	-0.0858031	0.0954955	-0.898504	0.368917	0.57404	NoSig
PDPR	2724.74	0.195717	0.139678	1.40121	0.161152	0.343406	NoSig
AARS1	10058.4	-0.111894	0.148259	-0.754721	0.450416	0.646632	NoSig
GLG1	9349.28	-0.0911732	0.107897	-0.845005	0.398108	0.600693	NoSig
KIF4A	363.071	0.95221	0.23048	4.13142	3.60535e-05	0.000660074	NoSig
TNRC6A	1675.14	-0.0659505	0.1293	-0.510056	0.610012	0.771007	NoSig
PLEKHG2	683.938	-0.590317	0.179319	-3.29198	0.000994838	0.00897617	NoSig
DLL3	572.538	4.38378	0.302697	14.4824	1.56448e-47	4.28495e-43	Up
NAT14	3262.47	0.214591	0.151062	1.42055	0.155449	0.335746	NoSig
PITPNM2	922.666	-0.585641	0.135075	-4.33568	1.45311e-05	0.000318393	NoSig
EXOC1	996.395	-0.214976	0.145974	-1.4727	0.140833	0.315962	NoSig
RBM27	467.367	-0.152236	0.147334	-1.03327	0.301479	0.508698	NoSig
POU4F3	1.52062	-0.59547	0.364634	-1.63306	0.102456	0.258299	NoSig
OSBPL8	2172.01	0.179236	0.221155	0.810455	0.417679	0.618234	NoSig
DTX2	716.668	-0.0058296	0.1182	-0.0493198	0.960664	0.981448	NoSig
NLRC4	30.8778	-0.396277	0.221112	-1.7922	0.0731008	0.205394	NoSig
PUS7	483.455	0.107559	0.136975	0.785247	0.432309	0.631392	NoSig
LAMB4	1.41701	-0.771261	0.403883	-1.90962	0.0561826	0.171204	NoSig
NRCAM	435.898	-0.019818	0.374284	-0.052949	0.957773	0.979994	NoSig
LAMB1	737.743	0.288524	0.246521	1.17039	0.241846	0.443279	NoSig
SLC26A4	16.0762	0.511752	0.339253	1.50846	0.131436	0.302665	NoSig
SLC26A3	0.92431	-0.845779	0.49082	-1.7232	0.084853	0.227802	NoSig
DLD	2379.62	-0.361584	0.110434	-3.27422	0.00105953	0.00938835	NoSig
WDR7	602.806	-0.409731	0.100917	-4.06008	4.9056e-05	0.000850376	NoSig
TXNL1	2523.72	0.00122055	0.0914266	0.0133501	0.989348	0.995148	NoSig
IL5RA	4.22768	-0.481071	0.397589	-1.20997	0.22629	0.42482	NoSig
ABCC6	42.6605	-0.369398	0.167484	-2.20557	0.0274138	0.103578	NoSig
CMTM6	1535.25	0.629043	0.128132	4.90935	9.13773e-07	3.41437e-05	NoSig
ITGA6	423.366	-0.865939	0.180067	-4.80898	1.51705e-06	5.16797e-05	NoSig
RAPGEF4	1256.01	-0.789596	0.306952	-2.57237	0.0101004	0.0507224	NoSig
MAP3K20	585.977	-0.680155	0.202878	-3.35254	0.000800744	0.00758878	NoSig
SMPX	0.706579	-0.0518614	0.648594	-0.0799598	0.936269	0.968592	NoSig
FH	3302.18	-0.066805	0.0858523	-0.778139	0.436487	0.63473	NoSig
SEL1L3	539.266	-0.760908	0.374966	-2.02927	0.0424306	0.141052	NoSig
TF	1667.5	0.020028	0.613648	0.0326376	0.973964	0.987594	NoSig
CDV3	5379.48	0.548113	0.107872	5.08114	3.75182e-07	1.7013e-05	NoSig
MYO15A	61.9182	-0.209952	0.143361	-1.4645	0.143057	0.31902	NoSig
ALKBH5	5860.72	0.00931715	0.101139	0.0921219	0.926601	0.963467	NoSig
APOH	0.357212	-0.594184	1.31705	-0.451149	0.651882	NA	NoSig
NLRP1	353.331	0.247032	0.27723	0.891071	0.372891	0.57773	NoSig
PITPNM3	54.3497	-0.307336	0.252329	-1.218	0.223224	0.42128	NoSig
SPAG7	3501.62	-0.17187	0.11123	-1.54518	0.122302	0.290209	NoSig
ORC6	86.8386	-0.107179	0.221614	-0.483631	0.628648	0.784886	NoSig
ZFHX4	44.4452	-0.561456	0.342513	-1.63922	0.101167	0.256157	NoSig
SLC17A6	0.824326	0.0868438	1.01028	0.0859602	0.931498	0.965809	NoSig
CPA1	1.09881	-0.218887	0.840574	-0.260401	0.794554	0.892399	NoSig
ZC3HC1	968.754	-0.210424	0.0701036	-3.00162	0.00268548	0.0190897	NoSig
ESR1	256.8	-1.20066	0.3202	-3.74974	0.000177019	0.0023377	Down
RGS17	16.2884	-0.370429	0.337377	-1.09797	0.272219	0.477325	NoSig
ANGPT2	96.8801	-0.182422	0.245715	-0.742414	0.457837	0.652837	NoSig
TMEM101	5647.48	0.78876	0.180363	4.37318	1.2245e-05	0.000275351	NoSig
CD200	526.498	0.841224	0.278097	3.02493	0.00248691	0.0179578	NoSig
CCDC80	629.655	0.985281	0.346683	2.84202	0.00448287	0.0280323	NoSig
CMA1	0.621625	-0.688287	0.551762	-1.24744	0.212238	NA	NoSig
PSME1	6092.87	-0.269773	0.116805	-2.3096	0.0209105	0.0860709	NoSig
PPP2R3C	670.209	-0.411082	0.138149	-2.97565	0.00292373	0.0202742	NoSig
HAUS4	1163.65	0.168346	0.139826	1.20397	0.228603	0.427707	NoSig
JPH4	109.098	0.269443	0.36044	0.747539	0.454738	0.650382	NoSig
MYH7	130.201	1.13596	0.310726	3.65584	0.000256344	0.00311215	Up
CEBPE	3.67613	-0.621711	0.356234	-1.74523	0.0809445	0.220692	NoSig
SLC7A8	59732.9	-0.332367	0.162843	-2.04103	0.041248	0.138296	NoSig
OSGEP	1171.82	-0.269742	0.0810951	-3.32625	0.000880236	0.00813936	NoSig
SLC22A17	1675.12	-0.846105	0.239151	-3.53795	0.000403249	0.00444629	NoSig
RNF31	1250.37	0.233702	0.128814	1.81426	0.0696378	0.198327	NoSig
SCFD1	1169.59	-0.419999	0.136968	-3.0664	0.00216652	0.0162362	NoSig
G2E3	212.315	-0.206044	0.208449	-0.988464	0.322925	0.530245	NoSig
HECTD1	12436.2	-0.553324	0.143109	-3.86645	0.000110431	0.00160711	NoSig
HNRNPC	17033.7	0.0918346	0.0629976	1.45775	0.14491	0.321762	NoSig
RPGRIP1	23.766	0.0936441	0.196105	0.477521	0.632991	0.787365	NoSig
SUPT16H	5341.35	-0.254138	0.0853364	-2.97807	0.00290073	0.0201901	NoSig
TOX4	3173.33	-0.0842638	0.0754212	-1.11724	0.263891	0.468544	NoSig
GEMIN2	117.533	0.136863	0.111835	1.22379	0.22103	0.419151	NoSig
TGM1	25.1235	-0.366613	0.23134	-1.58473	0.113027	0.275497	NoSig
TINF2	1842.46	-0.121935	0.0820507	-1.48609	0.137254	0.311319	NoSig
DAZL	0.0491165	0.0659807	2.39214	0.0275823	0.977995	NA	NoSig
TBL1Y	0.682	0.149364	0.769271	0.194163	0.846048	0.921136	NoSig
SEMA6A	6826.4	0.927395	0.220876	4.19871	2.6844e-05	0.000523668	NoSig
TRPM7	1267.63	-0.0348817	0.184861	-0.188691	0.850335	0.923422	NoSig
TYRO3	10387	-0.18138	0.153735	-1.17982	0.23807	0.438884	NoSig
WDR76	153.761	0.0843908	0.120892	0.698065	0.485137	0.674967	NoSig
CAPN3	4311.56	-0.751508	0.191328	-3.92785	8.57098e-05	0.00131808	NoSig
SNAP23	1422.92	-0.102515	0.109094	-0.939693	0.347375	0.553513	NoSig
TBX15	12.8263	-0.111101	0.261182	-0.425378	0.670561	0.814398	NoSig
PHGDH	3178.15	-0.00407995	0.332101	-0.0122853	0.990198	0.995395	NoSig
COL9A3	2432.83	-2.32544	0.356513	-6.52273	6.90376e-11	1.64424e-08	Down
EZR	7009.26	-0.422448	0.176638	-2.3916	0.0167751	0.0733597	NoSig
MYL6	19623.6	-0.0963154	0.105262	-0.915005	0.360189	0.566218	NoSig
AGO1	1585.24	0.163328	0.116664	1.39999	0.161517	0.343943	NoSig
TEKT2	16.4836	1.19388	0.280079	4.26263	2.02031e-05	0.000417932	Up
CLSPN	54.7774	-0.279486	0.247244	-1.13041	0.258305	0.462249	NoSig
RFFL	245.84	-0.243586	0.110106	-2.21229	0.0269464	0.102377	NoSig
UNC13D	253.195	-0.0262387	0.21533	-0.121854	0.903015	0.951623	NoSig
MFSD11	924.161	0.271512	0.10345	2.62456	0.00867604	0.0452306	NoSig
DPYSL2	2498.31	0.737123	0.234351	3.14538	0.00165872	0.0132592	NoSig
TGFB2	61.6284	-0.807401	0.301821	-2.6751	0.00747073	0.0404779	NoSig
GPATCH2	289.138	0.0105843	0.137242	0.077121	0.938527	0.969833	NoSig
NUP50	1386.14	-0.146599	0.0967653	-1.515	0.129774	0.300581	NoSig
CDC45	133.955	-0.0523135	0.18357	-0.284978	0.775661	0.880606	NoSig
COMT	13881.1	-0.706127	0.176882	-3.99209	6.54932e-05	0.00106964	NoSig
ADA2	1727.86	-0.709992	0.3133	-2.26617	0.0234408	0.0928578	NoSig
AC016026.1	27.6533	0.135767	0.296377	0.45809	0.646888	0.79714	NoSig
VNN3	0.49108	1.30709	0.581378	2.24827	0.0245592	NA	NA
ECHDC1	1130.01	-0.16434	0.147136	-1.11693	0.264023	0.468654	NoSig
LRRFIP2	1787.11	0.33525	0.0970499	3.45441	0.000551499	0.00571726	NoSig
[truncated: 53,105 more rows]
