# Supplementary material for: Methylation-driven gene DLL3 is a potential prognostic biomarker in ocular melanoma correlating with metastasis
Source: Front Oncol. 2022 Oct 20;12:964902. doi: 10.3389/fonc.2022.964902 (PMC9630341; doi:10.3389/fonc.2022.964902)
Supplement: Supplementary Table 3 — The correlation between the DEGs expression level and their DNA methylation level in UM. *P < 0.05, **P < 0.01. [file Table_3.xlsx]

## Sheet: r_value
	NLRP2	ROPN1	LIMS2	PGR	KCNK2	MYBPC2	CHGB	DLL3	EFS	MYH14	CLEC11A	RNF43	CNTN3	ROPN1B	DLGAP3	TBX2	ZNF835	SULT4A1	LRRC4B	GATA4	PKLR	MEGF10	BTBD10	ZSCAN1	AHCYL2	MPZ	ZNF208	CHRNB2	ASRGL1	SYNPR	GRIK3	DNALI1	HPGD	ZNF667-AS1	KLK13	MYO7B	SLC16A5	MRAP	ZNF415	CDC42BPG	LURAP1	GSTA3	TSGA10IP	PCDHB9	MSC	LINC02610	SCN8A	ZNF560	ZNF334
cg00419298	0.115249	0.22206	-0.0731749	-0.00139864	-0.063012	-0.175101	0.264571	-0.0241903	0.00780807	0.0626181	0.046797	0.134675	0.0594384	0.0176103	0.195086	-0.00308622	0.0247573	0.241774	0.13272	-0.0380175	0.0719055	0.10899	0.0965051	0.11519	0.0181209	0.0625579	0.0500839	0.080624	-0.0184984	0.0226128	0.0560296	0.105541	-0.0545314	0.0782787	0.208329	0.00293056	0.0297844	0.0112771	0.12343	0.0272974	-0.0517895	0.140248	-0.0803022	0.135132	-0.190425	-0.0157314	0.0823007	0.0574194	0.0880428
cg02448222	0.0978574	0.142813	0.277851	-0.0867031	0.0333394	-0.0200708	-0.0376117	0.0845482	0.111978	0.202186	0.244514	0.172247	0.140048	0.20447	0.144227	0.30219	0.238933	0.176069	0.110609	0.07246	-0.0127662	0.130305	-0.104194	0.116668	0.0995113	0.0593073	0.156585	0.0646113	0.215842	0.267226	0.109384	-0.127665	0.156758	0.293672	0.235198	0.110816	0.0928226	-0.144757	0.188984	0.080398	0.22957	0.0964	0.0365693	0.0446825	0.0896404	-0.013102	0.130846	0.225375	-0.00908948
cg06474646	0.0855099	0.0991695	0.150833	-0.0909949	0.0844981	-0.0479087	0.0623607	0.162864	0.122967	0.106144	0.0877498	0.152882	0.0463957	0.0351459	-0.0471649	-0.176497	0.121578	0.0745659	-0.0107408	0.185859	-0.12396	0.141961	-0.186727	0.0748111	-0.0835979	0.167125	0.150235	0.0540863	0.138065	0.0973163	-0.0591854	0.0671743	0.167391	0.17444	0.127154	0.0559387	-0.139165	-0.142695	0.133665	-0.0452716	-0.00760172	0.193965	-0.035629	0.0890243	0.0483355	-0.0334977	0.0305594	0.142074	-0.089557
cg06988775	-0.0679659	0.014024	0.0867543	-0.205126	0.0260475	0.0237731	0.0905997	0.00534735	0.121722	0.123866	0.0817663	0.0719427	0.0831854	0.055902	0.0516298	0.13729	0.090363	0.0471044	0.043198	0.031472	-0.0802974	0.0412086	-0.105463	0.0861019	0.139524	0.00502338	0.03726	-0.143506	0.0429514	-0.0308171	-0.0192371	0.0729829	0.0240318	0.0947523	0.196664	0.0888524	0.0327648	-0.131095	0.118991	0.157101	0.187466	0.0095707	-0.0598915	0.0252687	-0.0814055	0.0874655	-0.0244783	0.0235274	0.0225522
cg07259151	-0.250083	-0.365356	-0.242747	0.12727	-0.140251	0.0190822	-0.157143	-0.260417	-0.304071	-0.324797	-0.278938	-0.367569	-0.24764	-0.336646	-0.302462	-0.241544	-0.424709	-0.303909	-0.307144	-0.189643	-0.122955	-0.289261	-0.0111703	-0.388945	-0.346607	-0.251441	-0.322232	-0.0518371	-0.232468	-0.158986	-0.162663	-0.311189	-0.30252	-0.382388	-0.374153	-0.227808	-0.32492	0.10477	-0.368772	-0.38604	-0.340671	-0.289556	-0.187761	-0.250359	-0.241386	-0.280991	-0.243537	-0.227744	-0.145754
cg08738403	0.361446	0.657074	0.542447	-0.215781	0.34547	-0.0413791	0.27636	0.382732	0.395683	0.443256	0.52171	0.644144	0.614814	0.628504	0.476152	0.3554	0.602718	0.582909	-0.00509706	0.479529	0.244107	0.611448	-0.296026	0.468116	0.356118	0.333938	0.316918	0.511697	0.542771	0.630854	0.495145	0.241699	0.42923	0.650908	0.69631	0.326032	0.0864598	-0.243565	0.512077	0.359883	0.478959	0.324386	0.304928	0.285426	0.473528	0.14503	0.491331	0.236362	0.049542
cg09424566	0.104319	0.28497	-0.00323273	-0.0468988	0.0513998	-0.0821625	-0.0328621	-0.025143	-0.0940113	0.0489573	-0.0544126	0.178281	0.149602	0.15686	0.182734	0.196555	-0.0034933	0.0903322	-0.0770763	0.0238219	0.133199	0.0965582	0.0525271	0.0524264	0.0820888	-0.164752	-0.125019	0.115839	0.108498	0.240375	0.0411449	-0.157511	-0.120639	0.0114715	0.0907487	0.0430293	0.144975	-0.0374468	0.101028	0.0938838	0.0483074	0.0786379	-0.0373349	-0.202251	-0.0848363	-0.152426	0.165901	-0.0259714	0.055155
cg11961845	0.137298	0.636894	0.369009	-0.165644	0.220419	-0.0967609	0.136549	0.279248	0.11643	0.328691	0.37707	0.560293	0.379816	0.452939	0.387541	0.228916	0.411672	0.37838	0.0312834	0.34259	0.24168	0.417154	-0.208108	0.301155	0.194985	0.198821	0.268619	0.241853	0.33136	0.501908	0.210863	0.148265	0.261094	0.478554	0.527615	0.237665	0.0633483	-0.0879434	0.39789	0.237523	0.240951	0.368114	0.127941	0.0795287	0.245868	-0.0493006	0.30149	0.313868	-0.0283446
cg13365375	0.141282	0.35665	0.310043	-0.0388061	0.234374	-0.104564	-0.0513329	0.334966	0.198694	0.25138	0.276927	0.400675	0.18024	0.309451	0.114173	-0.0162319	0.372755	0.330376	0.0310431	0.346648	0.123997	0.226359	0.0869114	0.424079	0.237047	0.326401	0.390805	0.0727316	0.260337	0.26813	0.0402373	0.108034	0.293266	0.431381	0.301216	0.345301	0.242346	-0.20489	0.436097	0.18677	0.227139	0.283139	0.220116	0.30956	0.170816	0.209411	0.2433	0.287355	0.259698
cg13504856	0.252567	0.0605671	-0.0464942	0.00393431	-0.0126519	0.131952	-0.174311	0.030429	-0.130148	0.0726796	0.0585297	0.0532022	0.0588181	0.0875411	-0.014262	0.0185582	-0.0403321	0.0277402	0.0734849	0.0240501	-0.0651279	0.0219049	0.0789644	-0.0617282	0.0796787	-0.101753	-0.0871139	0.0331546	0.212922	0.185933	0.0471219	-0.208171	0.109005	0.00891607	0.0988408	-0.188327	-0.0188745	-0.068657	0.0755588	0.0310876	0.0602166	0.0178426	-0.104068	-0.195225	0.113537	-0.0412953	0.0991989	-0.0693284	0.0122756
cg14755690	-0.400573	-0.10288	-0.208688	-0.0295752	-0.173391	-0.221339	-0.0616454	-0.246135	-0.207522	-0.196217	-0.145036	-0.20291	-0.272791	-0.207099	-0.281416	-0.232181	-0.280319	-0.398434	-0.0623519	-0.117268	0.0759004	-0.220802	-0.0413851	-0.38541	-0.201544	-0.138976	-0.0621068	-0.314307	-0.307941	-0.195296	-0.301845	-0.042033	-0.179066	-0.270437	-0.210553	-0.138371	-0.172191	-0.0315507	-0.255911	-0.273162	-0.22062	0.000623722	-0.146228	-0.187954	-0.159785	-0.0617683	-0.35775	0.0138589	-0.114836
cg15488143	0.0313771	0.213064	0.220999	-0.0352179	0.363027	0.00174234	0.274031	0.0721127	0.373987	0.358917	0.244888	0.311561	0.326219	0.266564	0.172693	0.0462138	0.331282	0.189997	-0.0565344	0.227719	-0.0506711	0.241775	-0.108382	0.27015	0.126077	0.207973	0.224074	0.26967	0.191364	0.269525	0.285492	0.145285	0.23851	0.328448	0.302904	0.0351885	0.102758	0.00923305	0.244725	0.166453	0.21107	0.209615	0.180047	0.167347	0.176092	0.210667	0.280475	0.292272	0.206538
cg15664152	-0.0410326	0.132316	-0.203405	0.140521	-0.0965462	0.0143621	-0.28141	-0.270721	-0.391535	-0.0120838	-0.236575	-0.0461899	-0.0515974	-0.0364729	0.0637346	-0.0580294	-0.243924	0.0206068	-0.0412351	-0.169851	-0.045776	-0.126738	0.154514	-0.185851	-0.227627	-0.278698	-0.139657	-0.207986	-0.00671606	0.0504667	-0.185668	-0.402312	-0.167206	-0.205485	0.0704574	-0.216075	-0.127568	0.150431	-0.137064	-0.175067	-0.170764	-0.090467	-0.267327	-0.430139	-0.33379	-0.415052	-0.0550649	-0.0566868	-0.0966077
cg15927257	-0.105758	-0.103467	-0.0418466	-0.0958889	0.152993	0.144677	-0.0366446	-0.0140725	0.160473	0.052571	-0.00944345	-0.0152311	0.0481092	0.0796397	-0.113286	0.0303466	0.0816858	0.0944637	0.0279045	-0.0413447	-0.0818259	-0.0562396	0.0586333	0.120418	0.122312	0.0340966	0.0810432	-0.108406	-0.0827743	0.0493521	-0.0135425	0.0551051	-0.00292601	0.0391892	0.00633866	-0.0434952	0.0597975	-0.117311	0.109767	0.0398357	0.0898306	-0.0857858	0.134668	0.0134751	-0.13215	0.21451	0.0545307	0.0417333	0.299151
cg16166368	-0.173317	-0.497009	-0.477639	0.343036	-0.343801	0.122713	-0.395973	-0.454803	-0.45152	-0.3646	-0.590614	-0.536979	-0.428675	-0.54384	-0.293193	-0.270084	-0.61697	-0.322492	-0.202527	-0.45026	-0.271582	-0.483677	0.202898	-0.47831	-0.42714	-0.42366	-0.371112	-0.385074	-0.380883	-0.414146	-0.351349	-0.444976	-0.501722	-0.65517	-0.536283	-0.345597	-0.207095	0.231115	-0.532711	-0.398039	-0.350164	-0.457152	-0.411701	-0.399683	-0.530048	-0.385162	-0.358178	-0.371931	-0.209078
cg16584911	0.0446875	-0.111698	-0.230838	0.0352598	-0.0214023	-0.00904948	0.161789	-0.0643709	-0.0284568	-0.190977	-0.103488	-0.0958722	0.0389785	-0.160181	-0.0588756	-0.201702	-0.125853	-0.0438515	-0.021092	-0.150736	-0.0610229	-0.0169913	-0.0761568	-0.0949773	-0.158459	-0.0900569	-0.085928	0.0461839	-0.234034	-0.119526	0.089066	0.0149648	-0.005696	-0.102397	-0.131398	-0.187334	-0.225959	0.0585712	-0.117413	-0.171928	-0.150713	-0.176211	0.0228136	-0.0617551	-0.128652	0.0774857	-0.0151807	0.00723527	0.0289639
cg17483792	-0.141269	-0.48426	-0.366909	0.114803	-0.178706	-0.0038141	-0.200745	-0.461941	-0.239491	-0.276037	-0.214265	-0.416177	-0.201914	-0.306324	-0.482892	-0.13426	-0.359601	-0.315941	-0.104419	-0.470244	-0.299478	-0.343002	0.251616	-0.291039	-0.233313	-0.256258	-0.170384	-0.327797	-0.2098	-0.208438	-0.140254	-0.201671	-0.16557	-0.378735	-0.362673	-0.37173	-0.107142	0.0911456	-0.225305	-0.241268	-0.223436	-0.361209	-0.22632	-0.103358	-0.196675	0.0313111	-0.1659	-0.189046	0.0491813
cg17539479	0.0923767	-0.0220799	-0.0454178	-0.0817177	0.0328483	-0.159348	0.172114	-0.0814901	0.0442795	0.123279	-0.0594588	-0.0186659	0.00539297	-0.096843	0.0182232	0.00176129	-0.00950662	0.178472	0.113774	0.0205962	-0.0238991	-0.00868601	-0.00159914	0.0784294	-0.0821262	0.107194	-0.0795739	0.139901	0.0895749	0.0382083	0.0492476	0.00759553	-0.059223	0.00227239	0.0338419	-0.0127261	0.0171247	-0.00946532	-0.0077001	-0.0694103	0.0148696	0.0100439	-0.0544174	0.0190313	-0.188897	-0.088301	0.117831	0.0245373	0.0243953
cg17827670	0.205338	0.594465	0.360243	-0.133382	0.189355	-0.105566	0.22191	0.27627	0.107769	0.323026	0.388842	0.560923	0.455061	0.41109	0.45762	0.285074	0.412865	0.458995	0.00575836	0.319266	0.246375	0.527892	-0.18439	0.285504	0.18512	0.202454	0.235727	0.365263	0.422816	0.458167	0.309186	0.158549	0.265036	0.48718	0.547816	0.282739	0.0554887	-0.122675	0.386376	0.235842	0.275227	0.239149	0.113084	0.168344	0.233074	-0.047179	0.346219	0.211678	-0.0191894
cg20013533	0.0715356	-0.298276	-0.43193	0.312141	-0.207242	0.106844	-0.282124	-0.169105	-0.439138	-0.276522	-0.412863	-0.305959	-0.325605	-0.435345	0.150664	-0.222355	-0.326453	0.0105837	0.228582	-0.331036	-0.230347	-0.318163	0.431898	-0.224581	-0.18605	-0.224123	-0.157914	-0.292032	-0.28228	-0.361562	-0.262106	-0.378674	-0.228407	-0.283638	-0.259397	-0.204106	-0.0258739	0.386366	-0.157628	-0.315383	-0.283439	-0.279089	-0.264514	-0.197802	-0.309415	-0.299975	-0.192583	-0.0113	-0.00323378
cg20734154	0.0153064	-0.0706154	-0.167757	0.0658818	-0.0201914	0.191064	-0.0849955	-0.0284287	-0.110956	-0.170541	-0.0833987	-0.128851	-0.00435578	-0.0346797	-0.237199	-0.116495	-0.170736	-0.122896	-0.0985275	-0.0978888	-0.126117	-0.0671841	0.0284322	-0.192528	-0.00912973	-0.15142	-0.182051	-0.0568334	-0.0299831	-0.0340079	-0.0743889	-0.148036	-0.0425525	-0.121625	-0.0838665	-0.081411	-0.194816	0.148668	-0.173467	-0.102756	-0.140373	-0.124189	0.0457738	-0.133711	-0.0545402	-0.17179	-0.126413	-0.079687	-0.0581502
cg20915333	0.13225	0.0734578	0.0426555	0.0239032	-0.032863	0.0447142	0.128905	0.0816654	0.0496163	-0.0755379	0.168822	0.142595	0.125279	0.134722	0.160023	-0.00096236	0.0752891	0.126003	-0.15649	0.0516381	0.130089	0.109123	-0.104538	0.0383148	0.1257	-0.095881	-0.0450351	0.202981	-0.00708214	0.139883	0.174342	-0.0148422	0.0998138	0.0980203	0.100545	0.0495452	-0.0567846	0.0160907	0.106026	0.031425	0.0930841	0.0813188	0.0366188	0.0999707	0.182732	0.0722326	0.129199	-0.0119306	0.0040073
cg22584802	0.336072	0.671809	0.538026	-0.233233	0.324708	-0.0526873	0.262969	0.376983	0.382418	0.437223	0.518129	0.648525	0.610323	0.636688	0.469383	0.346781	0.590446	0.590461	-0.00144237	0.479268	0.225972	0.611121	-0.299203	0.471839	0.357981	0.341095	0.326163	0.489708	0.538352	0.634752	0.466727	0.254112	0.428735	0.64567	0.709979	0.316444	0.0765993	-0.264707	0.511135	0.359923	0.480139	0.339336	0.302367	0.257689	0.438158	0.126977	0.482447	0.21312	0.0340794
cg25969460	-0.310147	-0.0723872	0.0500476	-0.105653	0.0670029	0.0149511	-0.0686475	-0.0528763	0.0869281	-0.0214464	0.0271686	-0.049715	-0.034484	0.0759547	-0.101411	-0.0863066	-0.0269272	-0.141529	-0.148748	0.041855	0.0520822	-0.0791165	-0.21227	-0.110105	-0.045446	0.00647253	0.0692903	-0.0571296	-0.0543745	0.0226301	0.00446652	-0.0646828	0.109301	0.000172304	-0.00156793	-0.0581385	-0.179767	-0.0290729	-0.11462	-0.103213	0.0341604	-0.0573157	0.0510983	0.00807281	0.104624	0.0609547	-0.139289	0.118368	0.00806893
cg27284840	0.0787638	0.107902	-0.0626878	0.0494943	-0.100624	0.0222611	0.0117656	0.043635	-0.161902	-0.0182271	0.00924096	0.0666039	0.0239275	-0.0622568	-0.0320141	-0.17669	-0.105434	0.0204293	0.0134769	-0.0282341	-0.0361305	0.0813915	-0.0307801	-0.014313	-0.122567	0.00667522	-0.0708866	-0.105528	0.019445	0.0139173	-0.0990646	0.0262187	0.00660521	-0.00874974	0.0837927	0.0407029	-0.104034	-0.0922513	-0.00514088	-0.121515	-0.0848381	0.00644283	-0.125359	0.0122179	-0.152787	-0.133839	-0.0938003	-0.126274	-0.0739822
cg00473624	0.0348347	-0.088877	0.0986584	0.0928274	-0.0270949	-0.0718836	0.142943	-0.116033	0.118847	0.0732511	-0.000647834	-0.114522	0.0452771	-0.0060238	-0.308074	-0.0362516	0.00905599	-0.16357	-0.247526	0.00788533	0.0635921	0.0617859	-0.190566	-0.0111187	-0.0749182	0.0181687	-0.0307305	0.0812801	0.0324773	0.00892113	0.0707037	0.129862	0.0216515	0.0107177	-0.0393089	0.0266878	-0.00772878	-0.271152	-0.102842	0.0489866	-0.0249084	-0.0353254	0.032616	0.15713	0.0080732	0.109575	-0.00956149	-0.0602836	-0.0911733
cg04728402	-0.0827702	-0.331432	-0.479985	0.0633123	-0.163268	-0.182651	-0.0248307	-0.390248	-0.316963	-0.168192	-0.262778	-0.340171	-0.0495946	-0.327941	-0.21471	0.0343525	-0.380346	-0.188496	0.0698969	-0.342002	-0.170456	-0.120275	0.289148	-0.410073	-0.0775617	-0.275764	-0.33298	-0.0715554	-0.17317	-0.096239	0.124717	-0.145885	-0.128001	-0.336485	-0.247046	-0.435517	-0.148675	0.0261966	-0.170955	-0.198162	-0.208511	-0.252791	-0.150133	-0.302071	-0.278746	-0.13685	-0.0754943	-0.188315	0.0715815
cg06239285	-0.17562	0.000274411	0.10249	-0.0377663	-0.0972331	0.0442842	-0.263436	-0.052907	-0.0820485	0.077741	-0.0276301	-0.0257477	-0.143858	-0.0774078	0.0267774	0.15675	-0.0108814	-0.127486	-0.0157601	-0.0102689	-0.0844065	-0.108178	-0.0783975	-0.00675604	-0.0110837	0.0195533	-0.0524145	-0.077136	-0.0319386	-0.0513855	-0.124906	-0.17045	-0.151185	-0.0213943	0.0121835	0.0247691	-0.0172631	-0.0854748	-0.0142741	-0.0304717	0.0081219	0.0163944	0.0711132	-0.258618	-0.104	-0.282081	-0.163461	-0.066642	-0.218936
cg08626382	0.254879	-0.124012	0.00484976	0.139025	-0.0603538	0.0733855	-0.0995656	0.0294494	-0.0762656	-0.0803753	0.0103663	-0.0791488	-0.0231917	-0.132138	-0.0815451	0.00993608	-0.131472	-0.0622641	0.0173841	0.0144064	-0.0329103	-0.0495663	0.014413	-0.181395	-0.0884156	-0.0526041	-0.186773	0.143821	0.0318092	0.0283943	0.0870905	-0.222951	-0.0163991	-0.0241762	-0.0406839	0.0045738	-0.126686	0.0157433	-0.135454	-0.0626928	-0.036994	-0.0234825	0.0530548	0.00486478	-0.0050435	-0.0758329	-0.0831693	-0.0384535	-0.233378
cg08764509	-0.0908921	0.260835	0.246236	-0.166418	0.335601	0.0200431	0.0317353	0.104045	0.256695	0.414432	0.271498	0.274828	0.325403	0.305152	-0.0310129	0.229476	0.186582	-0.0222564	-0.01545	0.24674	-0.0540763	0.198872	-0.111676	0.0892379	0.242177	0.264809	0.169564	-0.0986507	0.233787	0.326342	0.141245	0.082468	0.268115	0.252167	0.272907	0.0783192	0.140185	-0.25307	0.236088	0.20456	0.315767	0.298111	0.239213	0.0136414	0.0335994	0.204086	0.0310675	0.151662	0.244542
cg09347134	-0.131949	0.0954956	0.147739	-0.215178	0.374406	-0.0508447	0.228296	0.116254	0.320957	0.174549	0.142953	0.139673	0.174531	0.198539	0.0353371	0.0401794	0.272543	0.132188	0.0407915	0.176149	0.128672	0.15665	-0.0449327	0.16664	0.139712	0.238437	0.213641	0.245021	0.0907568	0.121519	0.160956	0.20025	0.273806	0.253045	0.121845	0.0423262	0.0413617	0.0157434	0.115695	0.203949	0.0286859	0.153632	0.216058	0.224092	0.229688	0.198453	0.201444	0.297634	0.145732
cg12640109	-0.094353	-0.295485	-0.467351	0.0823251	-0.0788319	-0.135017	0.0128266	-0.342374	-0.291209	-0.249557	-0.28724	-0.339169	-0.0552182	-0.349827	-0.14662	-0.0332798	-0.310693	-0.176891	0.000361012	-0.313192	-0.0761689	-0.132085	0.275225	-0.324472	-0.130121	-0.217145	-0.249109	-0.0124	-0.208271	-0.18782	0.0420206	-0.154151	-0.113284	-0.310351	-0.30145	-0.341179	-0.149086	0.0837176	-0.148566	-0.235464	-0.33339	-0.309475	-0.0691107	-0.289375	-0.334054	-0.227623	-0.0452266	-0.107656	0.0455129
cg13799206	-0.00062933	0.167864	0.0597005	-0.167607	0.089546	0.155737	0.0578272	0.290319	0.0287061	-0.0318387	0.019933	0.107102	0.00794811	0.10045	-0.0333938	0.0222723	0.0599277	0.114398	0.124108	0.114807	0.0800819	0.090674	-0.0502975	0.0619051	0.175715	0.0598904	0.0559838	0.0372801	0.0789984	0.0291663	-0.0822068	0.0553308	0.0616393	0.110322	0.0528461	0.135427	0.0604718	-0.123544	0.0461814	0.153152	-0.015082	0.114031	0.0145556	-0.0118422	0.0271249	-0.0500178	0.00788962	0.0949016	-0.0328909
cg14933468	0.0232664	0.238593	0.185161	-0.271546	0.276771	-0.22356	0.366806	0.0932413	0.300255	0.315379	0.23593	0.260991	0.270162	0.294491	0.228943	0.162574	0.318205	0.319177	0.105134	0.202036	0.18795	0.278225	-0.0512859	0.240014	0.21945	0.219011	0.169474	0.402123	0.236318	0.240827	0.313461	0.231706	0.235636	0.301885	0.272546	0.0519674	0.0891523	-0.101213	0.1677	0.253794	0.198687	0.253486	0.19025	0.194164	0.217061	0.157855	0.295042	0.22255	0.13411
cg15324424	-0.139226	-0.178582	-0.419418	0.117812	-0.194346	0.254268	-0.0778116	-0.146041	-0.4176	-0.179185	-0.307659	-0.270661	-0.257479	-0.330622	0.0255363	-0.0836358	-0.383973	-0.0115588	0.28651	-0.320047	-0.0976225	-0.28109	0.294401	-0.279341	-0.148689	-0.260916	-0.212395	-0.20498	-0.269981	-0.186811	-0.226863	-0.215683	-0.177607	-0.349577	-0.183327	-0.219386	0.0398377	0.216196	-0.244171	-0.199068	-0.288661	-0.216636	-0.216192	-0.210724	-0.31943	-0.290627	-0.220451	-0.134549	-0.0604445
cg16077226	-0.0874368	0.16387	0.147188	0.0354895	0.0663507	-0.00520925	0.113572	-0.0043833	0.146104	0.242845	0.128945	0.085932	0.0290305	0.102034	0.00869829	0.0401514	0.096892	-0.104709	-0.0616746	0.205904	0.0706627	0.0608593	-0.179277	-0.0497742	0.0590536	0.186918	0.0753919	0.0330991	0.102837	0.126285	-0.0194253	0.0628373	0.0447365	0.130879	0.108409	0.0243383	0.042967	-0.270026	0.0442079	0.0597294	0.109716	0.207152	0.0625176	-0.0427548	-0.00449173	0.0985796	-0.0184609	0.163303	0.0083761
cg18159819	-0.0267339	-0.102314	-0.146086	0.0657807	-0.150764	-0.0339717	0.0952537	-0.0777397	-0.167542	-0.197937	-0.0679223	-0.12591	-0.124195	-0.116919	-0.162179	-0.105371	-0.0624932	-0.11276	-0.0103903	-0.173891	-0.062947	-0.0138924	0.0152929	-0.155476	-0.0604471	-0.20284	-0.0272005	-0.0688217	-0.0352961	-0.000523862	-0.0479157	-0.0252438	-0.0545706	-0.0111909	-0.142284	-0.146432	-0.111751	-0.0105712	0.00358113	-0.076962	-0.194067	-0.0525578	-0.213015	-0.0483046	-0.0450132	-0.0385057	-0.00449324	0.154765	-0.0222109
cg22693702	-0.222247	-0.44676	-0.627098	0.296329	-0.263801	0.142826	-0.320932	-0.334559	-0.596697	-0.30788	-0.562096	-0.515992	-0.465297	-0.579413	-0.0991419	-0.283917	-0.645954	-0.282598	0.0844665	-0.457015	-0.209817	-0.556865	0.417582	-0.491512	-0.325943	-0.425892	-0.383231	-0.389658	-0.481263	-0.37953	-0.367657	-0.500163	-0.469981	-0.64576	-0.502533	-0.376961	-0.136801	0.384189	-0.476954	-0.423005	-0.45029	-0.32887	-0.316233	-0.455347	-0.508576	-0.421195	-0.417405	-0.255031	-0.0960312
cg23439361	0.115333	0.0582929	0.0265043	-0.036906	0.178669	-0.111756	0.1796	-0.0286033	0.146983	0.238287	0.107679	0.0404759	0.120206	0.104878	-0.14579	0.0193353	0.110211	0.025111	0.0709577	0.0321011	-0.0222841	0.163323	-0.0279871	0.0272801	0.0843842	0.163087	0.118868	0.142356	0.202152	0.248123	0.14019	0.143874	0.193268	0.155616	0.037767	-0.123879	0.0297418	-0.331735	0.132755	0.0247903	0.0478332	0.0849806	0.160817	0.0654505	0.0661765	0.189986	0.157087	0.141522	0.226261
cg24257490	-0.162214	-0.124288	-0.0630841	0.0670862	-0.0868033	-0.0330247	-0.074137	-0.0349488	-0.138627	-0.0252927	-0.100735	-0.225884	-0.292314	-0.198633	-0.0732221	-0.14933	-0.106044	-0.230603	-0.00229076	0.0261464	-0.0311887	-0.18457	-0.0656387	-0.308643	-0.190067	-0.137714	0.0871817	-0.201769	-0.0370287	-0.204881	-0.231013	-0.0143969	-0.0690137	-0.115635	-0.131134	-0.0516269	-0.0914816	-0.0252499	-0.216941	-0.0624515	-0.193866	-0.025698	-0.301329	0.0284257	-0.0422466	-0.00370552	-0.197419	0.0896155	-0.0555381
cg25830692	0.0192394	0.099834	0.290986	-0.0806581	0.0524579	0.0749472	0.00423733	0.208292	0.101035	0.09813	0.203284	0.120925	-0.0517078	0.0580265	-0.0385019	0.0542008	0.109577	-0.0731382	-0.0306719	0.254088	0.165231	0.0464792	-0.21526	0.0404066	0.0545608	0.156533	-0.023209	0.106569	0.102756	0.143445	0.0148021	-0.032646	0.111038	0.22003	0.0156996	0.245952	-0.0137612	-0.182135	-0.00121286	0.112713	0.0612005	0.20933	0.177052	0.0805626	0.13501	0.0587305	-0.0628872	0.127251	-0.212397
cg26547875	0.0418835	0.355739	0.290107	-0.0253898	0.102998	-0.157711	0.251788	0.152534	0.185376	0.243798	0.185817	0.362935	0.147868	0.195886	0.197337	0.108243	0.25332	0.130827	-0.13766	0.375022	0.347977	0.297169	-0.179276	0.0641287	0.246268	0.216405	0.111915	0.177944	0.153711	0.311406	0.15206	0.18187	0.058362	0.310865	0.27892	0.326651	0.0373206	-0.15231	0.159053	0.0428664	0.239199	0.342076	0.0731365	0.109302	0.112778	0.0545636	0.0996818	0.220853	-0.0708896
cg02083237	0.0190589	0.0468054	0.0993384	0.0429914	0.0520273	0.0447549	-0.0383998	0.132557	0.0745042	0.0481797	0.129564	0.180569	0.0327837	0.103933	0.0915345	0.0852809	0.0578794	0.0754987	-0.130203	0.0854037	0.117598	0.116327	0.0336289	0.185111	0.247055	0.0923815	0.0297495	0.0535411	0.078082	0.101119	0.121033	0.0637445	0.0653934	0.0502922	-0.0308266	0.166218	0.24883	-0.0126894	0.159759	0.164927	0.216382	0.14209	0.0502746	0.135127	0.0770012	0.0615638	0.17045	-0.0823207	0.0506939
cg03008269	0.0555322	-0.0206502	-0.0677852	-0.0140288	0.0182024	-0.0641304	-0.131056	0.100883	-0.014211	-0.252632	-0.104459	-0.0342053	-0.139311	-0.0111005	-0.0448079	-0.0393994	-0.140573	-0.0725042	-0.0167626	0.00778739	0.120405	-0.129529	-0.0584918	-0.0986153	0.000804746	-0.0871835	-0.162748	-0.0136836	-0.212151	-0.0926071	-0.0654125	-0.0616484	-0.159068	-0.164787	-0.122545	0.0010513	-0.127213	0.169682	-0.113049	-0.0462165	-0.0945508	-0.0895059	-0.0290102	-0.0925172	0.0447501	-0.0523033	-0.118779	-0.100696	-0.056913
cg03860400	-0.108501	-0.0304065	-0.372578	0.176028	-0.292222	0.0470811	0.0333367	-0.167573	-0.361484	-0.184008	-0.134731	-0.117193	-0.0880046	-0.301473	0.201061	-0.152032	-0.277273	-0.0578586	0.139133	-0.401458	-0.113285	-0.0560534	0.144373	-0.246899	-0.23172	-0.334503	-0.100039	-0.25534	-0.200382	-0.299495	-0.174602	-0.0908643	-0.216865	-0.22871	-0.0156847	-0.161824	-0.152216	0.283434	-0.172987	-0.247306	-0.216333	-0.196671	-0.300943	-0.213149	-0.304409	-0.229388	-0.244955	-0.15048	-0.133266
cg05994458	-0.190937	-0.0639306	-0.0928167	-0.0676853	-0.167274	-0.164304	-0.0798443	-0.110469	-0.0624876	-0.0417518	-0.132787	-0.147611	-0.131326	-0.131172	-0.0426715	-0.0399973	-0.18937	-0.180466	-0.0928558	-0.132063	0.0306435	-0.149898	-0.119768	-0.0775229	-0.147919	-0.203689	-0.21981	-0.15152	-0.163274	-0.201818	-0.149751	-0.0122339	-0.287533	-0.176572	-0.106258	0.0477487	-0.142064	-0.00570538	-0.222547	-0.13478	-0.0884454	-0.0639853	-0.0597275	-0.182009	-0.147346	-0.133476	-0.264995	-0.214125	-0.140944
cg08114852	0.0375802	0.589604	0.455091	-0.18649	0.418045	-0.0524344	0.109975	0.408936	0.315069	0.305009	0.392846	0.627652	0.240223	0.534095	0.217327	0.210736	0.526284	0.351677	0.00697396	0.453972	0.447229	0.284307	-0.0553044	0.465714	0.482301	0.413224	0.49093	0.188459	0.287941	0.461676	0.081167	0.149596	0.327217	0.501804	0.45012	0.363047	0.259446	-0.151733	0.567989	0.360733	0.380735	0.388118	0.281717	0.19672	0.399096	0.18778	0.274931	0.472442	0.150525
cg08540851	-0.0930476	0.0817264	0.0187752	-0.130239	0.0131118	0.0831201	0.00821804	0.0200054	-0.0328546	0.0303858	0.0370239	0.0173819	0.0291687	0.0468704	0.0824159	0.0107249	0.0780938	0.0506266	0.0686261	0.00881011	-0.10084	0.0277926	0.0112189	0.0516738	0.00153949	0.0319031	0.0252528	-0.114515	0.127085	-0.0566093	-0.0296776	-0.0435309	-0.0360106	0.0216973	0.0888777	0.0643261	-0.0554779	0.0442244	0.0968405	-0.0933237	0.0405252	-0.00659762	-0.00914295	-0.124142	0.00126559	-0.0582753	-0.0115653	0.0636981	0.074742
cg13187967	0.223141	0.11268	0.109181	-0.0525263	-0.030543	-0.0318804	0.36689	0.161158	0.187136	0.153656	0.218062	0.24723	0.0557098	-0.0183295	0.251562	0.0329497	0.165525	0.183769	0.200998	0.0505665	0.165729	0.150167	-0.0857084	0.16234	0.133237	0.151752	0.0909545	0.212493	-0.0516111	-0.024671	0.0982108	0.253393	0.0940451	0.203395	0.111928	0.172172	0.190038	0.00717154	0.151611	0.155422	0.118308	0.186898	0.0225587	0.303793	-0.0350388	0.129579	0.119998	0.0990872	0.000919031
cg13393276	0.184404	0.0109007	-0.120196	0.173155	-0.121281	0.0132174	-0.142425	-0.0896455	-0.12574	-0.145495	-0.113527	-0.0403434	-0.0139275	-0.112017	-0.140478	-0.157865	-0.182913	-0.124184	-0.165253	-0.0253997	-0.0415572	-0.0136584	-0.00431852	-0.0940887	-0.121614	-0.0737431	-0.13838	-0.0399756	-0.102355	0.00576861	-0.0838162	-0.0466662	-0.0545732	-0.00514721	-0.0923352	-0.0460293	-0.0542214	0.0102382	-0.111228	-0.0291516	-0.140586	-0.0371614	-0.0211449	-0.0640168	-0.250407	-0.223548	-0.053182	-0.150134	-0.0698755
cg15506587	-0.00356875	0.207195	0.140249	-0.30374	0.204728	-0.323969	-0.0947917	0.146929	0.0640292	0.0847282	0.138669	0.206941	0.137585	0.342716	-0.0320325	0.237322	0.0406306	0.000141873	-0.0907656	0.151344	0.145498	0.0177566	-0.130821	0.0112598	0.321426	0.0561101	0.0514605	-0.0407732	0.166381	0.269773	0.0200634	-0.132666	0.0953327	0.0877897	0.194	0.0589334	0.203427	-0.381413	0.206394	0.237786	0.298573	0.175219	0.0768428	-0.0507417	0.120647	0.0253533	0.0275872	0.0568288	0.172074
cg15746396	-0.146174	-0.0903596	-0.170579	-0.106734	-0.0961491	0.00493083	-0.0725626	-0.187373	-0.0933089	-0.112431	-0.246538	-0.136395	-0.186442	-0.101345	-0.0802795	-0.0252154	-0.189466	-0.0343259	-0.024293	-0.0789076	0.11121	-0.149846	0.0740907	-0.0751237	0.00108298	-0.0688348	-0.171512	-0.131604	-0.00962948	-0.0496888	-0.210469	-0.11808	-0.141797	-0.179725	-0.133345	-0.0954695	-0.0185228	0.0702545	-0.156077	-0.0834245	-0.122225	-0.115836	-0.150445	-0.169994	-0.274009	-0.0658986	-0.0126573	-0.0963752	0.0572276
cg16737567	0.113415	0.103494	0.139944	-0.0357373	0.0488975	0.103386	-0.213781	0.0914318	0.049115	-0.0666658	0.0705781	0.0961073	0.0685662	0.0628716	0.00244245	-0.0667319	0.0351499	-0.0237859	-0.130738	0.130172	0.0996638	0.0137591	-0.197083	0.128955	-0.00710931	-0.00397157	-0.0436827	0.0349433	-0.0290291	0.156055	0.0312469	-0.0119099	0.0283128	0.0858425	0.126627	0.144977	-0.140556	0.133601	0.0736843	-0.0287213	0.0257331	0.0471085	0.12109	0.019033	0.160575	-0.163209	-0.019879	-0.0432872	-0.158127
cg19189990	-0.129112	0.0393623	-0.0122166	0.00709938	0.0842596	0.0923803	0.0965465	-0.0729667	0.0297782	0.0464913	0.0898017	0.067412	0.0936721	0.024401	-0.142236	-0.152282	0.0507451	0.0345759	-0.0528148	-0.0950315	-0.184038	0.130609	-0.0790977	0.0404429	-0.0140915	0.053412	0.14583	-0.0611891	0.0546817	0.0750913	0.0187513	0.129436	0.0112222	0.00690194	0.0450219	-0.0737471	-0.0472825	0.102811	0.12763	0.0998537	0.034441	0.0538275	-0.0102604	0.0392924	0.113858	-0.0484611	0.0766203	0.120593	0.0251231
cg19557422	0.181968	0.0223238	0.0234428	0.0277612	0.018724	-0.0272801	0.0120905	-0.0857157	-0.0221455	0.0629114	0.0347554	0.019576	0.0338691	0.144491	0.148774	0.105328	0.040306	0.178641	0.0272492	-0.0795141	0.066903	0.0470597	-0.0407595	0.137417	0.0307679	-0.0513404	-0.0717724	0.0286672	0.164584	0.106176	0.212829	0.00147818	-0.025581	0.046835	0.117311	5.72465e-05	-0.0122595	0.060194	0.0343564	0.0621641	0.0705461	-0.0994184	-0.0777975	0.127265	0.0794254	0.0752165	0.120013	-0.0971895	0.0922033
cg01208537	0.0113498	0.193234	0.403077	-0.240523	0.17908	-0.0470709	0.210073	0.14899	0.351675	0.219279	0.310953	0.235156	0.278853	0.336663	-0.0294821	0.25219	0.3187	0.115276	-0.141964	0.343645	0.141235	0.27164	-0.284964	0.23816	0.157663	0.275858	0.114582	0.308907	0.33006	0.26487	0.184601	0.219513	0.242339	0.334116	0.197863	0.247344	0.0715764	-0.323611	0.209186	0.186854	0.285016	0.131472	0.186291	0.243548	0.197079	0.18113	0.244681	0.0854536	0.135228
cg02225305	0.0581424	0.242663	0.281844	-0.120534	0.252224	-0.0042234	0.221652	0.269342	0.456479	0.309854	0.287389	0.347993	0.252844	0.312984	0.184348	0.211572	0.264086	0.251266	0.0531864	0.337264	0.206689	0.238265	-0.190477	0.271652	0.371772	0.253471	0.206588	0.304456	0.161488	0.23928	0.233757	0.234013	0.259962	0.224115	0.25733	0.159514	0.176614	-0.307966	0.258487	0.209085	0.461328	0.217059	0.314067	0.22373	0.289145	0.263316	0.185474	0.114954	0.1244
cg02933228	0.218469	-0.186529	-0.174503	0.0588488	-0.0657261	0.00139746	-0.288773	-0.163926	-0.194932	-0.0931728	-0.131901	-0.201547	0.0475055	-0.0475919	-0.179596	-0.00624761	-0.153049	-0.031144	-0.113833	-0.186336	-0.271284	-0.0790304	0.137742	-0.211539	-0.145662	-0.235268	-0.174601	-0.074429	0.149967	0.078828	0.0559511	-0.356019	-0.0103564	-0.0947527	-0.0727286	-0.339548	-0.226084	-0.012942	-0.0663772	-0.235311	-0.0818697	-0.262523	-0.239532	-0.255206	-0.0266298	-0.139527	0.0694999	-0.109247	0.0825935
cg04258272	0.0741234	-0.259218	-0.198793	0.292908	0.0231336	0.0282687	0.011031	-0.329702	-0.154037	-0.0680905	-0.164885	-0.251082	-0.0979086	-0.175665	-0.138719	-0.0170736	-0.199088	-0.0671267	-0.0330372	-0.233221	-0.212133	-0.0854266	0.266358	-0.149626	-0.130773	0.0661874	-0.150469	0.00907951	0.126586	-0.00848934	0.021516	-0.0995224	-0.108134	-0.181089	-0.196398	-0.193791	-0.00546154	0.0277196	-0.13854	-0.107133	-0.126798	-0.181065	-0.0353569	-0.106251	-0.158651	-0.199938	-0.00143031	-0.149999	0.140149
cg05109931	-0.154407	0.132443	0.199042	-0.0704199	0.202263	0.11114	0.157057	-0.108637	0.32047	0.286796	0.156392	0.132503	0.0922746	0.209629	0.0146136	0.0723367	0.225952	-0.00918301	-0.0958074	0.137638	0.0208486	0.0977872	-0.135045	0.13426	0.0644745	0.195706	0.187436	0.0947668	0.200899	0.177402	0.030355	0.167103	0.131955	0.173769	0.0911808	-0.00630349	0.0957468	-0.139485	0.123354	0.117634	0.162283	0.156879	0.0914477	0.163204	0.100709	0.156172	0.153004	0.20575	0.145261
cg05474055	0.0325561	0.146135	0.176254	-0.0293506	0.0978772	0.0385371	-0.0477451	0.0274417	0.115869	0.173978	0.167409	0.127127	0.0635315	0.19116	-0.0207821	0.0973746	0.123377	0.00185572	-0.0325557	0.0799149	-0.0374529	0.104642	-0.0522467	0.130368	0.122385	0.0414568	0.12137	-0.00588122	0.229524	0.111181	0.0807939	0.056536	-0.0387672	0.0990626	0.17469	0.0612882	0.0891665	-0.0463239	0.188143	0.182439	0.208657	0.0928218	0.019475	0.0340375	0.127861	0.0473413	0.0598868	0.0229539	0.123975
cg05485853	-0.0258483	-0.265972	-0.429663	0.296762	-0.131381	0.0588498	-0.0482515	-0.376027	-0.311455	-0.259031	-0.292798	-0.288593	-0.0930644	-0.270818	-0.11621	-0.222616	-0.159124	-0.0730237	0.00989756	-0.381352	-0.250639	-0.149459	0.41469	-0.224798	-0.17058	-0.226942	-0.0741551	-0.133756	-0.243204	-0.118466	0.0341384	-0.191725	-0.0868685	-0.18369	-0.265628	-0.392482	-0.252398	0.221319	-0.0542486	-0.403795	-0.3719	-0.279699	-0.134293	-0.196825	-0.269815	-0.111059	0.0490636	0.053447	0.274602
cg06250751	0.156152	0.226616	0.388324	-0.0862564	0.301917	0.0793971	0.273496	0.202638	0.489763	0.348968	0.318631	0.331229	0.242741	0.391431	0.0574413	0.178337	0.388154	0.136915	-0.126972	0.369526	0.208426	0.243417	-0.229466	0.306537	0.388992	0.303695	0.286182	0.318916	0.248454	0.280501	0.26536	0.196116	0.28481	0.327657	0.277317	0.236921	0.301582	-0.357289	0.299059	0.360723	0.447649	0.212447	0.284424	0.336975	0.33529	0.368599	0.26945	0.207621	0.116933
cg06507434	0.00653253	-0.0213533	0.0873345	0.00620436	0.098827	0.119933	0.175297	0.00252282	0.161845	0.119309	0.159514	0.1091	0.199505	0.107814	-0.0222534	0.0256989	0.227658	0.236793	-0.0895997	0.0503993	-0.0673566	0.159166	-0.0130225	0.207695	0.0939338	0.239638	0.208312	0.336693	-0.0210403	0.195812	0.287857	0.168118	0.109867	0.206753	0.074455	-0.107119	-0.0206987	-0.142172	0.215998	0.0717604	0.054975	-0.0569381	0.249187	0.143139	0.0427666	0.212181	0.254917	0.0923653	0.188728
cg08028295	-0.048484	-0.27988	-0.217941	0.239358	-0.0309497	0.0517618	-0.0298906	-0.294685	-0.111679	-0.0482741	-0.246318	-0.283159	-0.208811	-0.275049	-0.0859233	-0.119054	-0.192279	-0.0369463	-0.0253028	-0.260559	-0.184883	-0.192125	0.226101	-0.164526	-0.160541	0.0975642	-0.0873591	-0.0487289	0.00769209	-0.161543	-0.0864263	-0.17584	-0.162142	-0.208836	-0.252224	-0.212951	-0.12424	0.219787	-0.173525	-0.254603	-0.167053	-0.199042	-0.108351	-0.0876529	-0.197336	-0.239887	-0.028576	-0.0473127	0.104287
cg08145798	0.153491	-0.27801	-0.191362	0.113628	0.082244	0.064126	-0.178042	-0.205501	-0.095894	-0.0891358	-0.160483	-0.252391	0.115855	-0.0737284	-0.158726	-0.0342753	-0.0801554	-0.104051	-0.186689	-0.153623	-0.309595	-0.108427	0.114156	-0.212999	-0.150555	-0.104591	-0.17	0.0325515	0.044225	0.0769636	0.153374	-0.3322	0.0737491	-0.0743168	-0.116127	-0.372057	-0.276621	0.0169065	-0.0763746	-0.315997	-0.147383	-0.32798	-0.0573965	-0.185576	0.0555758	-0.061806	0.0844461	-0.0955575	0.108852
cg10577273	0.244636	0.174517	0.186751	-0.0153728	0.125288	0.0840579	0.236584	0.0459426	0.248744	0.399624	0.281679	0.251578	0.248556	0.144734	0.259195	0.277944	0.287762	0.204071	0.101054	0.1326	0.0742026	0.254058	-0.117611	0.225315	0.216861	0.159617	0.127225	0.178189	0.150155	0.267507	0.296256	0.138267	0.205067	0.310878	0.319528	0.100256	0.0515174	-0.0587854	0.233943	0.0814092	0.234836	0.183003	0.172273	0.196697	0.0736006	0.195891	0.170722	0.173916	0.107736
cg15323937	0.155211	0.168209	0.188922	0.0495118	0.0826639	0.0467192	0.136761	0.096832	0.184856	0.229833	0.0958832	0.184578	0.146994	0.263479	0.118272	0.237024	0.133128	0.0969976	0.0300261	0.168504	0.141834	0.12576	0.0467192	0.122136	0.295371	0.126973	0.0670946	0.138431	0.0564942	0.18535	0.119209	0.134269	0.114116	0.147692	0.214969	0.178772	0.28411	-0.391161	0.139882	0.239449	0.290695	0.121292	0.136091	0.161558	0.0934476	0.204108	0.0968169	-0.049584	0.0965252
cg16278877	-0.252616	0.149381	0.169177	-0.0584896	0.0827261	-0.018849	-0.269254	0.124399	0.0140949	-0.00220443	0.027147	0.0710314	0.0504248	0.156906	-0.181293	0.0150307	-0.0526774	-0.345204	-0.143844	0.151746	0.104877	-0.14799	-0.154018	-0.120597	0.0427522	0.134078	0.0350955	-0.312066	-0.121348	-0.100819	-0.220125	-0.164952	0.137924	0.00276643	0.173796	0.107999	0.0446406	-0.284104	-0.0318515	0.139636	0.0783842	0.108286	0.0817713	-0.0985078	0.0116403	0.0312314	-0.345326	0.0188211	-0.142568
cg17987027	0.0839856	-0.0328826	0.0310879	0.0551947	0.0306869	-0.00542681	0.0732722	-0.0820868	0.060869	0.135098	0.106771	-0.0264546	0.0976004	-0.0259675	-0.115987	0.121959	-0.011738	0.0151929	-0.154157	-0.00121613	-0.0431547	0.00901946	-0.192234	0.050373	-0.0653658	0.0330775	-0.135876	0.168263	-0.114262	0.133832	0.107782	0.0311091	-0.0229536	0.0448134	-0.0627936	-0.049588	-0.0525874	-0.146609	-0.0392363	0.0273217	-0.0265787	-0.0275097	0.187281	-0.0423799	-0.111096	-0.0125869	0.0622953	-0.140167	0.00853426
cg18557263	0.0237582	-0.0482766	-0.0209662	0.00603077	0.0507671	0.0833365	0.204823	0.0265111	0.0769971	0.0595681	-0.0737156	-0.0241798	-0.0368089	-0.0428298	0.380878	0.111483	0.116203	0.23217	0.0983938	0.00318181	-0.0492034	0.0341758	0.0542757	0.133184	0.0420092	-0.00843188	-0.0730943	0.205483	0.121541	0.00547302	0.0768122	0.055164	-0.0479483	-0.0228736	-0.0823239	0.029305	0.103233	0.167045	0.00317102	-0.0091312	-0.0175153	-0.041227	-0.0443244	-0.00404495	0.119042	0.0253492	0.22627	-0.016144	0.128863
cg19753373	0.0329984	0.18117	0.0512514	-0.111103	0.0431148	-0.0695556	0.115393	0.0409443	0.0274793	0.0727138	-0.0120626	0.109542	0.132452	0.187877	0.172874	0.144365	0.0683755	0.0794795	0.0645308	0.177366	0.113553	0.0600042	-0.010501	0.0982099	0.139176	0.0403534	-0.00876667	0.0367472	0.179446	0.0988585	0.0427111	0.0381246	0.0467089	0.0768489	0.178454	0.117746	0.0548478	-0.0874427	-0.00240024	0.0241909	0.240431	0.132489	0.0172843	-0.148226	0.0188295	0.0418877	0.0506119	-0.0134836	-0.0346379
cg20987132	0.122224	0.231382	0.277835	-0.165207	0.140128	-0.0694171	0.299385	0.0435502	0.374662	0.290347	0.272552	0.278199	0.293203	0.366238	0.148359	0.226638	0.316622	0.192437	-0.157516	0.269781	0.208504	0.295404	-0.150807	0.298253	0.304385	0.277753	0.169294	0.264327	0.344013	0.373135	0.271513	0.278787	0.251436	0.348745	0.247899	0.0938525	0.108869	-0.329377	0.291635	0.233765	0.388782	0.297106	0.151506	0.177885	0.209806	0.265641	0.29509	0.121216	0.18099
cg22147163	-0.024911	0.126795	0.154054	-0.0677935	-0.106489	-0.141905	0.167417	-0.172444	0.134209	0.161058	0.173025	0.14601	0.0410632	0.138788	0.144252	0.15492	0.138325	0.0787089	-0.00979761	0.0310232	0.127043	0.108859	-0.136563	0.12859	0.048421	0.0211777	0.0495873	0.0622426	0.147729	0.106746	0.125138	0.141266	-0.119018	0.152976	0.162256	0.0599839	0.0253528	-0.219475	0.0425048	0.0534026	0.249228	0.158956	0.0622712	-0.0457999	-0.0924922	-0.00282417	0.00429134	0.103279	-0.0144462
cg24555834	0.158933	-0.177707	-0.392983	0.137707	-0.36738	0.118856	-0.047025	-0.344632	-0.332393	-0.207919	-0.286926	-0.249284	-0.0212106	-0.223682	-0.0875653	-0.0373107	-0.338726	-0.141441	-0.0966869	-0.341204	-0.169729	-0.0386371	0.229216	-0.329679	-0.121087	-0.316205	-0.289794	-0.138061	-0.00612121	-0.128815	-0.0967223	-0.141037	-0.169024	-0.278928	-0.13548	-0.335953	-0.129132	-0.00164502	-0.175924	-0.212183	-0.154925	-0.305668	-0.379967	-0.368717	-0.374952	-0.133926	0.00138408	-0.375223	0.0123458
cg24980551	0.0194494	0.172143	0.247132	-0.0558234	-0.0474739	0.0512716	-0.0938813	0.0500171	0.131959	0.122098	0.0468324	0.136987	-0.017565	0.195244	0.0220171	0.173404	0.0717837	-0.042925	0.00648531	0.11238	0.105955	0.000864155	-0.0667424	0.0876706	0.151037	0.103718	0.0488846	-0.105892	-0.00428092	0.0218155	-0.134072	0.00822737	0.0129537	0.117996	0.239886	0.168786	0.266707	-0.483571	0.078022	0.243427	0.273441	0.12991	0.0335403	0.0350856	-0.0387973	0.11593	-0.134633	-0.0391403	-0.135284
cg01072639	-0.0909126	-0.066781	-0.00833748	0.211195	-0.00877439	0.005743	-0.119442	-0.128415	-0.052414	-0.00276764	-0.0437853	-0.0708435	-0.075263	0.0335226	-0.10174	0.0297414	-0.0695809	-0.0332037	-0.00657092	-0.0922015	-0.149404	-0.0765088	0.119358	-0.0448884	-0.101591	0.0395773	0.0193401	-0.0826002	0.0605897	-0.114867	-0.104368	-0.0694039	-0.0309061	-0.0741206	0.034689	-0.135384	0.0495278	-0.107514	-0.0742027	0.0130237	-0.00755692	-0.131713	-0.102192	-0.115198	-0.173468	-0.130896	-0.0350704	-0.107883	-0.000218303
cg01296682	-0.110736	-0.0792877	-0.147388	0.228723	-0.192032	0.00502562	-0.110419	-0.107765	-0.195663	-0.30693	-0.128316	-0.0964514	-0.113954	-0.128242	-0.0786109	-0.229456	-0.118625	-0.147315	-0.198914	-0.112957	-0.127612	-0.10793	-0.0066947	-0.140344	-0.160573	-0.170049	-0.0649847	-0.162893	-0.179533	-0.0868665	-0.131351	-0.154631	-0.117858	-0.0566312	-0.109286	-0.0894887	-0.156724	0.114273	-0.109411	-0.146216	-0.229659	-0.0771608	-0.0912087	-0.13494	-0.137837	-0.180764	-0.130047	-0.0504218	-0.147396
cg06739520	-0.0813476	-0.0550897	-0.143505	-0.0340654	-0.0556819	-0.0940562	-0.100732	-0.099575	-0.178353	-0.157031	-0.196494	-0.126447	-0.0993699	-0.0277567	-0.0529805	-0.139654	-0.182807	-0.0934459	-0.0125789	-0.0814321	0.00877042	-0.114058	-0.0307248	-0.167439	-0.145563	-0.181881	-0.104426	-0.0335987	-0.175431	-0.152653	-0.115607	-0.123045	-0.110344	-0.201973	-0.123146	-0.113954	-0.0178206	-0.0328641	-0.175422	-0.0384247	-0.0924258	-0.0901152	-0.115939	-0.143394	-0.121088	-0.175385	-0.1163	-0.103315	-0.145281
cg07140797	0.243918	-0.244264	-0.342075	0.180602	-0.344022	0.026701	-0.0105089	-0.125216	-0.319191	-0.266862	-0.203902	-0.211442	-0.225396	-0.371316	0.0238042	0.00353919	-0.239045	0.0449306	0.119634	-0.338064	-0.114958	-0.093851	0.25481	-0.150521	-0.0998531	-0.273057	-0.240618	-0.0546605	-0.170231	-0.187059	-0.0561411	-0.085057	-0.334211	-0.273203	-0.284452	-0.11868	-0.0361416	0.305048	-0.0918002	-0.248082	-0.200423	-0.213187	-0.260109	-0.0857516	-0.238162	-0.116901	0.0343428	-0.233036	0.00525507
cg07642638	-0.110755	-0.195827	-0.148154	0.381016	-0.25715	-0.012119	-0.227391	-0.285862	-0.202622	-0.247837	-0.226959	-0.21955	-0.171812	-0.192403	-0.185485	-0.198752	-0.206136	-0.207529	-0.251674	-0.201932	-0.176719	-0.186026	0.0385772	-0.177866	-0.216792	-0.181823	-0.11706	-0.204463	-0.199198	-0.205355	-0.163429	-0.15719	-0.131866	-0.171978	-0.171846	-0.193784	-0.228022	0.0331909	-0.233752	-0.20164	-0.241644	-0.250986	-0.155877	-0.233539	-0.268609	-0.309998	-0.157869	-0.185554	-0.267243
cg18082354	0.111375	0.192282	0.128277	-0.0316955	0.0847839	0.016017	0.202022	0.153095	0.122349	0.0432641	0.199509	0.166992	0.195098	0.198026	0.14615	0.0393381	0.238969	0.142503	-0.00447769	0.132241	0.163469	0.212934	-0.0976504	0.209329	0.06538	0.0590894	0.12718	0.211041	0.0950221	0.0781544	0.189197	0.169458	0.19802	0.244267	0.189779	0.117326	0.0752571	-0.0477528	0.163634	0.0541004	0.0524953	-0.0732474	0.146264	0.20192	0.208768	0.108756	0.159929	0.0828029	0.120427
cg21368865	0.0607333	0.0627087	-0.00165892	-0.0228408	0.080931	0.0785474	-0.201778	-0.0185496	-0.0159833	0.00344339	0.00549135	0.0477274	0.084815	0.0200571	-0.204227	-0.0827466	-0.0895064	-0.0849576	-0.0790984	-0.0093551	-0.16249	-0.0082385	0.0314895	-0.0514083	-0.0281225	0.0156975	-0.0751979	-0.0984393	0.0392576	0.167023	-0.0711216	-0.0734904	-0.0888361	-0.0832601	0.0395635	-0.0487776	-0.0366994	-0.000480551	0.0289966	-0.0533714	0.0378783	0.0541269	0.0145954	-0.167511	-0.0401356	-0.084761	0.0134669	-0.0488201	0.020687
cg22140378	-0.0101197	-0.171863	-0.131108	0.297379	-0.139753	-0.0299207	-0.0516963	-0.235296	-0.0533408	-0.04624	-0.188821	-0.197001	-0.101636	-0.180258	-0.127749	-0.00500653	-0.166583	-0.0734449	-0.106759	-0.199007	-0.109425	-0.0590992	0.1497	-0.135327	-0.0227881	-0.0661594	-0.105496	-0.08442	-0.0682304	-0.102861	-0.0131717	-0.00980512	-0.136772	-0.136484	-0.160436	-0.137687	-0.0841373	0.0302527	-0.125746	-0.106373	-0.0575312	-0.237182	-0.116878	-0.0594044	-0.200805	-0.201799	-0.0699413	-0.130847	-0.0644784
cg23432201	0.162191	0.0366216	0.00902762	-0.152988	0.121512	-0.0779312	-0.0292636	0.124695	0.102917	0.0822619	0.0482613	0.0861712	0.108489	0.0616978	0.021295	-0.0234123	0.113513	0.149852	0.0906424	0.0799443	-0.110905	0.0807548	0.0427381	-0.00878445	-0.0129225	0.101076	0.119605	0.0210091	0.0648386	0.0375953	0.0398614	0.0413117	0.138353	0.0887249	0.085224	-0.0240158	0.0109863	-0.117909	0.0940421	-0.0518914	-0.0262184	-0.0207528	-0.0018645	0.110227	0.098992	0.128535	0.0705317	0.0693273	0.121787
cg23433607	-0.0235082	-0.0185889	-0.129518	0.102632	-0.0950988	-0.0727068	0.0155078	0.0492102	-0.142892	-0.0821522	0.0108691	-0.0631346	-0.0672297	-0.115683	-0.00115764	-0.0124097	-0.0872302	-0.0197893	0.237156	-0.115973	-0.0288664	-0.0013761	0.0512538	-0.0886934	-0.146876	-0.132874	-0.0972955	0.00109209	-0.0402851	-0.108864	-0.0159855	0.0456576	0.0248644	-0.0602325	-0.0272753	-0.0756603	-0.194486	0.0642674	-0.0868417	-0.154146	-0.19998	-0.0296522	-0.00356427	-0.0751509	-0.0866362	-0.240711	-0.0866328	-0.0856695	-0.0946495
cg23533198	0.153657	-0.105159	-0.174342	-0.0320596	-0.0930455	-0.0804718	-0.0509398	0.00686052	-0.148175	-0.0198025	-0.0628246	-0.149056	-0.156706	-0.146507	-0.0505306	-0.185382	-0.0930029	0.0206047	0.193497	-0.128627	-0.0585296	-0.0588651	0.0227025	-0.0642021	-0.0205619	0.0258341	-0.0820536	-0.114057	-0.0122103	-0.124242	-0.0425656	-0.0183396	-0.053689	-0.0733865	-0.114798	-0.0978574	-0.0930315	0.0263632	-0.0606591	-0.215001	-0.0754457	-0.0472903	-0.0986054	0.0171319	-0.00655622	-0.133403	-0.0559825	-0.0563829	-0.0062209
cg00151906	0.082585	0.0692488	0.123209	-0.111788	0.102504	-0.195844	0.194185	-0.00717442	0.162375	0.313115	0.124285	0.0590509	0.0880704	0.156281	-0.0290296	0.167556	0.143743	0.0512944	0.0637137	0.0878709	0.119409	0.134135	-0.0782651	0.0716792	0.130812	0.107112	0.0720787	0.18596	0.144213	0.192902	0.171025	0.157643	0.121205	0.158131	0.068912	0.0306572	0.157105	-0.295205	0.0886707	0.137493	0.123504	0.126457	0.109684	0.14245	0.127472	0.0764699	0.135266	0.0749265	0.115439
cg00818872	-0.136511	-0.102724	0.131962	-0.149257	0.0634532	-0.0576874	-0.0410961	0.159021	0.125051	-0.118253	-0.0462864	-0.0265262	-0.134407	0.0558865	-0.264794	-0.070493	0.138286	-0.0143905	-0.0887019	0.129503	-0.0816979	-0.126	-0.0785348	0.138279	0.170635	0.206663	0.102628	-0.112041	-0.0619154	0.0615537	-0.155626	-0.000824729	0.110997	0.112497	-0.123656	0.125718	0.0165867	-0.16472	0.0480869	0.00515432	0.00151265	0.0797296	0.0885843	0.0693707	0.130544	0.102859	-0.0249019	0.144895	-0.0375387
cg02293668	-0.0956615	0.139988	0.210414	-0.129846	0.0544904	-0.186614	-0.0712577	0.0345257	0.176265	0.191763	0.0165034	0.0880769	0.00957126	0.109031	-0.0887004	0.104632	0.0444205	-0.0269823	-0.120153	0.121205	0.0170662	0.0222063	-0.140273	-0.00679551	0.0304659	0.0939436	0.0491175	-0.0957973	0.219962	0.0510293	-0.123686	-0.0173487	-0.0855332	0.0870475	0.0856585	0.173771	0.0692374	-0.2417	0.0232494	0.103925	0.238022	0.0969693	-0.0323733	0.042264	-0.012054	-0.0265975	-0.0310429	0.0451696	0.0111234
cg05746024	0.0247913	0.163218	0.341676	-0.123921	0.0927665	-0.0620763	-0.048492	0.133297	0.202145	0.182138	0.150831	0.123793	-0.103167	0.22557	0.0556413	0.101534	0.24296	0.0548045	0.0785059	0.182361	0.103229	-0.00909383	-0.0778372	0.161417	0.131913	0.194999	0.184185	-0.0731389	0.243109	0.145966	-0.115527	0.0235913	0.16459	0.172405	0.0785774	0.203381	0.137939	-0.293497	0.0807765	0.117789	0.124947	0.130046	0.0610247	0.18702	0.325781	0.110595	-0.0451292	0.205845	-0.0107969
cg06776548	0.0464025	0.103896	0.177266	0.0186298	0.239016	-0.140892	0.0543794	0.0302499	0.174801	0.211674	0.111772	0.104451	-0.00659832	0.206137	0.0219896	0.038579	0.131991	-0.0110302	0.0195304	0.228083	0.172403	0.049492	-0.0217597	0.0173271	0.0957101	0.160716	0.0836843	0.116486	0.0836701	0.232307	0.0959726	0.0626431	0.0990856	0.190765	0.136445	0.0643307	0.0671826	-0.152926	0.0346644	0.12423	0.200911	0.174079	0.140912	0.0959165	0.122394	0.121059	-0.0163389	0.17536	0.0621841
cg09322655	0.0312991	0.232925	0.370628	-0.079688	0.274438	-0.0120075	0.348474	0.00382855	0.434171	0.349784	0.283399	0.244552	0.32324	0.391556	-0.0186154	0.15109	0.353873	0.112841	-0.236437	0.295819	0.101914	0.309844	-0.266435	0.263126	0.155344	0.288302	0.180053	0.39119	0.316072	0.358522	0.284491	0.290572	0.304417	0.307269	0.237659	0.138801	0.122211	-0.347952	0.157938	0.275831	0.252657	0.191863	0.225901	0.268676	0.206204	0.280404	0.299193	0.0884698	0.10247
cg10970392	0.0902337	0.162386	0.323473	-0.0453059	0.235056	-0.0556739	0.275914	0.0625757	0.392119	0.469399	0.263475	0.224752	0.225488	0.30142	0.0597092	0.367893	0.318421	0.144585	0.0171491	0.228266	0.12558	0.246807	-0.100999	0.245673	0.246692	0.249599	0.158752	0.315684	0.294125	0.307962	0.245682	0.257391	0.239166	0.295532	0.210525	0.137914	0.309876	-0.428637	0.223898	0.323902	0.334511	0.17156	0.177496	0.258183	0.18551	0.295485	0.24964	0.116194	0.209778
cg11193281	0.240058	0.385663	0.37415	-0.167036	0.41443	0.114089	0.387461	0.326161	0.505705	0.375525	0.477319	0.523644	0.578591	0.565593	0.216662	0.264368	0.585751	0.457744	-0.0802692	0.411012	0.124352	0.490179	-0.10666	0.49546	0.410683	0.39797	0.265977	0.547639	0.403876	0.603516	0.520769	0.289454	0.479995	0.57518	0.445986	0.117208	0.105654	-0.244959	0.594533	0.345849	0.423942	0.354903	0.422621	0.265725	0.451865	0.34631	0.583083	0.206893	0.343677
cg12392557	-0.147319	-0.327467	-0.584616	0.104043	-0.358856	0.0714334	-0.141199	-0.372295	-0.545237	-0.409234	-0.491033	-0.468164	-0.395342	-0.487065	-0.24031	-0.310602	-0.53988	-0.372685	0.0461045	-0.541351	-0.219739	-0.378844	0.268145	-0.600948	-0.428299	-0.364231	-0.263631	-0.382682	-0.245232	-0.448686	-0.46361	-0.373511	-0.323048	-0.531015	-0.377245	-0.477047	-0.218821	0.204915	-0.401481	-0.412792	-0.504126	-0.428723	-0.664386	-0.414491	-0.470463	-0.234024	-0.270872	-0.158337	-0.0573214
cg12654064	-0.124606	0.0389457	0.2224	-0.00208545	0.0400103	0.0359874	-0.0530555	0.299392	0.100565	0.110693	0.037923	0.066724	-0.0783101	0.00682445	0.0193596	-0.0702142	0.0311944	-0.0628833	-0.117065	0.155958	-0.0471726	-0.077264	-0.220027	0.0188021	-0.0279122	0.0477786	-0.0493353	-0.100267	-0.0522116	0.079706	-0.150506	0.014989	-0.0779927	0.0537462	-0.0332445	0.255079	0.0536959	-0.063506	-0.109521	-0.00703617	0.0234073	0.072973	-0.0403373	0.0944533	0.0971866	-0.0184864	-0.166574	-0.00443712	-0.0879061
cg13393009	0.122514	0.262785	0.470114	-0.218722	0.457343	-0.0141634	0.410947	0.183105	0.610388	0.480776	0.452442	0.361309	0.468831	0.52637	0.0782133	0.29383	0.572992	0.293618	-0.135238	0.432641	0.147879	0.445255	-0.276612	0.414414	0.348952	0.449046	0.343277	0.52736	0.402804	0.52899	0.474226	0.403898	0.483558	0.589526	0.355069	0.161311	0.141479	-0.44282	0.411347	0.366473	0.416424	0.276726	0.426682	0.37087	0.388705	0.431145	0.451081	0.264898	0.309121
cg14926097	-0.0888118	-0.039472	0.14744	-0.126007	0.169636	0.0432214	0.186479	0.0593294	0.244679	0.232937	0.0710046	0.0962001	0.160955	0.176269	-0.135457	0.255501	0.139026	0.0708943	0.0462338	0.105241	0.104108	0.177992	0.0191679	0.101479	0.201863	0.15839	0.0886801	0.176626	0.226337	0.127861	0.145673	0.163256	0.200446	0.145855	0.0849116	0.0981883	0.169941	-0.286694	0.131503	0.169388	0.246584	0.0854064	0.152639	0.16569	0.0842117	0.177407	0.147139	0.0254194	0.171225
cg15858059	0.0744608	0.148907	0.417986	-0.189648	0.24926	-0.0765781	0.271538	0.0747699	0.457032	0.380936	0.305474	0.272599	0.239191	0.326556	0.069263	0.380226	0.402502	0.157772	-0.0698792	0.284586	0.139217	0.233724	-0.170932	0.286461	0.278331	0.26376	0.191708	0.339085	0.21334	0.365269	0.248475	0.266748	0.26343	0.397153	0.230175	0.182756	0.29991	-0.564635	0.283029	0.338444	0.36141	0.159167	0.261451	0.276321	0.207306	0.374693	0.236302	0.176795	0.176036
cg17127816	0.0960002	0.191466	0.200542	0.0202602	0.217372	0.0195893	0.249803	0.153999	0.283504	0.362951	0.231574	0.250601	0.206522	0.270237	0.172787	0.239004	0.179166	0.243942	0.0576488	0.190188	0.134057	0.210881	-0.0441313	0.221002	0.324936	0.187091	0.106488	0.253653	0.282545	0.215923	0.214348	0.218559	0.172518	0.110359	0.217505	0.148399	0.255986	-0.296523	0.195498	0.316018	0.32059	0.113531	0.13051	0.201482	0.275475	0.179368	0.203511	-0.128069	0.148384
cg17887936	-0.181077	-0.0103242	-0.285275	0.321703	-0.0898152	0.0222312	0.012108	-0.17279	-0.226619	-0.24583	-0.21564	-0.161164	0.00770263	-0.108487	-0.0216744	-0.169641	-0.21099	-0.136071	-0.109313	-0.122463	0.1134	-0.0272595	0.300138	-0.141771	-0.0670214	-0.146778	-0.0377588	-0.0765669	-0.131673	-0.183668	-0.0448536	0.0874224	-0.0989989	-0.19862	-0.137735	-0.0993822	-0.135101	0.255256	-0.137467	-0.134901	-0.255835	-0.198281	-0.0874252	-0.162055	-0.181683	-0.208939	-0.102531	-0.129676	0.100045
cg18288119	-0.0193013	0.317719	0.443026	-0.297961	0.222179	-0.291522	0.0483086	0.28524	0.302765	0.30908	0.30595	0.342938	0.174836	0.391125	0.18796	0.245866	0.352183	0.227305	-0.016927	0.399884	0.175618	0.21648	-0.191172	0.295321	0.279073	0.375771	0.252756	0.290087	0.317048	0.339365	0.128374	0.172781	0.160607	0.369055	0.19134	0.269842	0.185868	-0.215975	0.207721	0.3268	0.311775	0.307826	0.297806	0.0580758	0.291385	0.0521699	0.235749	0.318834	0.162807
cg19312536	0.280876	0.305337	0.322654	-0.180315	0.266501	0.0747505	0.0634051	0.398321	0.216566	0.285696	0.246978	0.333545	0.246296	0.324423	0.072469	0.0693667	0.303032	0.376988	0.0483303	0.370279	0.00832259	0.21937	2.39959e-05	0.309167	0.336176	0.296294	0.265745	0.0893464	0.352898	0.313167	0.0721711	0.0871521	0.237937	0.377627	0.38195	0.269819	0.258468	-0.208052	0.356743	0.320821	0.331749	0.289132	0.102684	0.165805	0.237964	0.140814	0.135258	0.222619	0.177286
cg21052164	-0.0418322	0.320976	0.399069	-0.147364	0.134683	-0.193796	-0.0997914	0.245148	0.241222	0.298262	0.202758	0.276659	0.00745817	0.296724	0.0649125	0.0491944	0.268013	0.0907151	-0.0264227	0.266766	0.11937	0.0736467	-0.210479	0.213101	0.139468	0.233393	0.241796	-0.106579	0.292748	0.159555	-0.105017	-0.0174056	0.0987393	0.31168	0.288056	0.292118	0.0908249	-0.302225	0.18046	0.145478	0.249266	0.236409	0.0271528	0.194839	0.210198	0.0173327	0.00190087	0.240108	-0.0449144
cg24498305	0.0191808	-0.0135671	0.116176	0.00356304	-0.0822746	-0.0270618	-0.0177058	0.0185632	-0.0110426	0.0479717	-0.0252393	-0.0994262	-0.0669368	-0.0271481	-0.132799	0.0884697	-0.0378847	-0.0623842	0.0730004	0.0218745	-0.0437417	-0.0452336	0.00284938	-0.170058	-0.0141119	0.0800998	-0.0868646	-0.0689655	0.071463	0.0235751	-0.0560762	-0.155919	-0.0205496	-0.00992856	-0.0293445	0.0961196	0.0116903	-0.200802	-0.107302	-0.100957	0.104114	0.0081928	0.00114693	-0.0734677	-0.0671437	-0.0524028	-0.122138	0.00869248	-0.104399
cg24860819	0.0925235	0.137012	0.302107	0.059143	0.0620804	-0.0613573	0.228404	-0.0138161	0.306465	0.166263	0.198131	0.139723	0.10109	0.274056	-0.0358355	0.0958613	0.269497	0.0820811	-0.170446	0.209898	0.207264	0.209738	-0.207448	0.207812	0.146258	0.164851	0.118663	0.217626	0.16144	0.237164	0.179906	0.247573	0.114105	0.24394	0.166332	0.182573	0.0434409	-0.425213	0.126816	0.13609	0.177097	0.180563	0.143195	0.243674	0.127042	0.171972	0.118123	0.0155315	-0.0354184
cg25730356	-0.0799061	0.141005	0.317663	-0.212533	0.1275	-0.115605	-0.0294329	0.251347	0.191774	0.275266	0.121271	0.194833	-0.025731	0.152982	0.0951446	0.132942	0.203773	0.00803611	0.0354312	0.185984	-0.0214554	0.0277148	-0.215324	0.147903	0.0959326	0.201381	0.0500651	-0.11756	0.127651	0.110888	-0.108783	0.0487883	-0.0246105	0.164278	0.0984997	0.310682	0.135225	-0.274902	0.0665055	0.135457	0.203748	0.256882	0.128838	0.0738959	0.102264	0.0558604	-0.0952514	0.175599	-0.0165259
cg01130127	-0.123064	-0.245209	-0.290921	0.0870802	-0.101346	-0.00428752	-0.230193	-0.320398	-0.307223	-0.237803	-0.426495	-0.354686	-0.237805	-0.236993	-0.254984	-0.223323	-0.450503	-0.301916	-0.176164	-0.230141	-0.160953	-0.320833	0.0499123	-0.378493	-0.419883	-0.195722	-0.288162	-0.151212	-0.176034	-0.28928	-0.251558	-0.319481	-0.334436	-0.482687	-0.309278	-0.239502	-0.14123	0.0521076	-0.391415	-0.2312	-0.227388	-0.210401	-0.226587	-0.328899	-0.356208	-0.39311	-0.233869	-0.268905	-0.138202
cg01270246	0.00813449	-0.0552572	-0.230518	0.270938	-0.104778	-0.0647254	0.114648	-0.230526	-0.185383	-0.10207	-0.183087	-0.18819	-0.0275641	-0.102684	0.0286024	-0.154753	-0.156517	-0.108055	-0.0101566	-0.109188	0.0595301	-0.0465685	0.136119	-0.224412	-0.132205	-0.158665	-0.178446	0.00820358	-0.059816	-0.0886526	0.10042	-0.00865587	-0.110929	-0.172131	-0.07107	-0.18848	-0.205012	0.0969281	-0.169063	-0.159555	-0.109338	-0.0648992	-0.110639	-0.212284	-0.0172779	-0.196938	-0.0859774	-0.133491	0.0172304
cg02759846	-0.092408	-0.275575	-0.206684	0.163545	-0.244257	-0.00284496	-0.132196	-0.255218	-0.343001	-0.132843	-0.312934	-0.357037	-0.197281	-0.284454	-0.262312	-0.175073	-0.36334	-0.261166	-0.198682	-0.208612	-0.142344	-0.291186	0.220831	-0.330638	-0.204385	-0.235673	-0.23884	-0.180134	-0.08227	-0.148872	-0.148102	-0.255165	-0.289233	-0.361989	-0.33219	-0.191472	-0.190225	0.035376	-0.302414	-0.153305	-0.292998	-0.0839558	-0.229122	-0.292317	-0.271617	-0.262284	-0.223537	-0.209012	-0.0607452
cg06947430	0.00981846	-0.227728	-0.240306	0.162266	-0.324459	0.0700871	-0.158459	-0.230454	-0.379317	-0.135189	-0.21798	-0.290713	-0.271643	-0.342055	-0.212639	-0.0236935	-0.362068	-0.211084	0.0697685	-0.294854	-0.128961	-0.271617	0.258081	-0.292849	-0.255211	-0.251051	-0.247572	-0.183861	-0.214916	-0.235511	-0.215969	-0.259808	-0.275764	-0.34842	-0.242334	-0.176513	0.0485136	0.0895652	-0.244294	-0.147747	-0.248646	-0.244051	-0.262526	-0.272975	-0.322597	-0.152098	-0.224344	-0.228059	-0.119953
cg08678044	0.0252353	-0.032037	0.0333666	0.106868	0.0477556	0.129314	0.00918383	0.097257	0.0932453	0.0944746	-0.0980599	0.0278774	0.0224923	0.0394308	0.0157046	-0.171296	0.189988	0.223139	-0.0691481	0.126439	-0.13728	0.136784	0.0726271	0.167608	0.0216052	0.0927598	0.229348	0.0201682	0.102088	-0.0785846	0.0273587	0.0837793	0.19322	0.142235	0.130585	-0.0306101	-0.0390294	0.0579345	0.184207	-0.0455329	0.0258415	0.0146771	-0.0965287	0.119175	0.111994	0.0386335	0.17756	0.0632962	0.0616948
cg09511427	0.115026	-0.0858815	-0.0853538	0.00616469	-0.118646	-0.0688098	0.0245783	0.0150376	-0.125133	-0.0273753	-0.0748019	-0.0678033	-0.137937	-0.0917216	0.0961168	-0.133473	0.0221673	0.160359	0.215997	-0.0738035	-0.013304	0.00516083	0.0596719	0.0480793	-0.133672	-0.0358123	0.0493627	-0.00650956	-0.0738499	-0.0706213	-0.0425319	0.0575787	0.0485372	0.00438039	-0.00937575	-0.0284252	-0.010108	-0.0159683	0.0134561	-0.213645	-0.0968466	-0.173674	-0.179932	0.10032	0.0245586	0.00325145	0.0648895	-0.0275661	-0.0264448
cg10773601	0.0361977	0.180338	0.0593756	-0.172264	0.155761	-0.0834258	0.140916	0.0246284	-0.0110752	0.192868	0.0514026	0.107801	0.191719	0.165866	0.0477914	0.0292923	0.132107	0.165798	-0.034745	0.140058	0.0840548	0.131584	-0.0429044	0.105815	0.133719	0.0595742	0.0837804	0.134121	0.18263	0.294592	0.170456	-0.0246889	-0.028441	0.141647	0.250027	-0.0162006	0.0199854	-0.143189	0.163482	-0.0409853	0.144227	0.169834	0.0785956	-0.143762	-0.0104412	-0.0617171	0.131091	0.12708	0.17565
cg13152535	0.129035	0.0943385	0.0507213	-0.0815845	0.0480496	0.0556627	0.196235	0.180743	0.146576	0.119936	0.0943957	0.130342	0.154139	0.119849	0.255449	-0.0813526	0.362721	0.413599	0.142904	0.0794499	-0.0605669	0.322949	-0.00442109	0.261902	0.125732	0.137574	0.350021	0.10535	0.173983	-0.01616	0.143334	0.257518	0.298241	0.340999	0.258114	-0.00810812	-0.0128387	-0.0778509	0.333457	-0.0318463	0.0821984	0.023232	-0.0281514	0.26548	0.123379	0.213665	0.309116	0.17717	0.251661
cg16651537	0.0691212	0.0457966	0.0464436	-0.0831174	0.0764374	0.0107558	0.164213	0.195824	0.1168	0.103789	0.0128405	0.0937096	0.0754342	0.0474385	0.216351	-0.12671	0.290213	0.385855	0.167988	0.107902	-0.108183	0.210975	0.0777631	0.232791	0.118946	0.182126	0.371712	0.0698811	0.161154	-0.0788029	0.0506816	0.139591	0.253802	0.273982	0.243245	0.0230496	0.0684183	-0.0398905	0.301127	-0.0747193	0.0646422	-6.93802e-05	-0.0870061	0.297107	0.071958	0.209352	0.24636	0.216932	0.274151
cg18723560	-0.0665233	-0.141355	-0.190507	0.409595	-0.13635	0.732448	-0.120076	-0.1658	-0.149913	-0.222545	-0.203937	-0.195893	-0.111237	-0.228896	-0.142262	-0.289083	-0.19235	-0.204025	-0.200535	-0.145079	-0.104288	-0.134837	0.0973345	-0.159295	-0.287541	-0.161958	-0.116857	-0.149717	-0.205725	-0.155291	-0.110242	-0.16314	-0.131769	-0.209381	-0.163554	-0.0953473	-0.236296	0.586123	-0.186105	-0.26253	-0.213574	-0.195608	-0.0991409	-0.128549	-0.15493	-0.158935	-0.131422	-0.113115	-0.143603
cg20308817	0.0173962	0.24953	0.150127	-0.15811	0.122683	0.0180428	0.098106	0.110594	0.0842941	0.208746	0.201772	0.228663	0.251847	0.315091	0.153553	0.184523	0.244786	0.18168	0.124475	0.176524	0.127519	0.170223	0.0796694	0.145982	0.186991	0.122635	0.0964114	0.13575	0.234884	0.292423	0.203804	0.043082	0.208107	0.218305	0.3055	0.0092437	0.0374716	-0.00828475	0.246598	-0.0278392	0.188192	0.117256	0.0429989	-0.0305479	0.223749	0.0622389	0.197856	0.221479	0.241146
cg24790297	0.119903	0.269588	0.275956	-0.194595	0.180233	-0.1159	0.19197	0.33644	0.16883	0.430676	0.206105	0.270978	0.110616	0.215972	0.268266	0.0524113	0.363126	0.398755	0.211657	0.291981	0.115703	0.216469	-0.0815209	0.334645	0.246979	0.221011	0.301606	0.112002	0.293603	0.138135	0.097116	0.081989	0.21247	0.372592	0.433077	0.214287	0.233958	-0.168884	0.357986	0.158357	0.272383	0.230151	-0.025122	0.177677	0.186233	0.0666956	0.189611	0.239416	0.130428
cg25309343	0.0875191	0.383399	0.397393	-0.394827	0.346552	-0.176163	0.244292	0.276587	0.34083	0.49135	0.308686	0.411167	0.266688	0.350286	0.28163	0.235866	0.435859	0.331849	0.276275	0.392685	0.15163	0.309296	-0.172821	0.37258	0.277169	0.38357	0.278246	0.28713	0.353207	0.39046	0.215925	0.222056	0.201816	0.45013	0.45017	0.286273	0.261433	-0.195639	0.378908	0.174845	0.420591	0.375899	0.225837	0.144963	0.229986	0.128037	0.267134	0.352473	0.171921
cg07674386	0.259723	0.49116	0.654524	-0.238184	0.394567	-0.0259722	0.343222	0.533115	0.644104	0.387046	0.625935	0.623251	0.461154	0.610414	0.30795	0.272927	0.705558	0.457119	-0.0543158	0.578893	0.348106	0.489198	-0.360249	0.598195	0.486245	0.494468	0.413987	0.4922	0.450426	0.541595	0.44366	0.417343	0.495561	0.708493	0.520795	0.486617	0.175298	-0.290588	0.529938	0.396942	0.557237	0.442863	0.445641	0.50626	0.642299	0.440787	0.447919	0.362682	0.117951
cg08105471	-0.187935	0.226702	0.21861	-0.130753	0.307257	-0.0818615	-0.0120276	0.153898	0.207704	0.235369	0.0467601	0.206701	-0.0603602	0.238409	0.0456618	-0.148059	0.18567	0.144491	-0.0705295	0.213378	0.101703	-0.0246119	-0.121607	0.265013	0.0442362	0.206886	0.246053	0.0796178	0.0685628	0.146535	-0.118482	0.0773498	0.0499076	0.148104	0.0561442	0.140429	0.0353904	0.00574111	0.059064	0.13513	0.0165504	0.300315	0.116593	0.168273	0.135908	0.00514002	0.097114	0.200055	0.0435588
cg09614932	0.19324	0.525261	0.617794	-0.314569	0.443116	-0.0446925	0.384726	0.382178	0.601593	0.569682	0.603722	0.609165	0.542711	0.67134	0.32933	0.350054	0.680366	0.434564	-0.0246955	0.55674	0.306095	0.50284	-0.31162	0.533525	0.470547	0.42957	0.36878	0.520258	0.511129	0.624834	0.463543	0.359719	0.543521	0.685686	0.609604	0.338615	0.197976	-0.421649	0.557845	0.461182	0.517387	0.470754	0.382029	0.406482	0.594134	0.378373	0.463631	0.346403	0.208752
cg11635155	0.259907	0.507074	0.715559	-0.319987	0.363674	-0.150226	0.349668	0.605001	0.669521	0.464957	0.69521	0.675566	0.454497	0.641279	0.384668	0.341126	0.794881	0.471422	0.0894914	0.615985	0.321321	0.552158	-0.427825	0.621554	0.493946	0.511028	0.435273	0.485461	0.449231	0.523159	0.447837	0.471633	0.567782	0.817957	0.562511	0.539069	0.251956	-0.424297	0.590565	0.466581	0.592248	0.444389	0.473796	0.610957	0.702242	0.472443	0.423999	0.382963	0.0854761
cg19611602	0.159956	0.464579	0.529922	-0.275903	0.268436	-0.137936	0.281938	0.419911	0.475753	0.303751	0.54719	0.552255	0.363156	0.56924	0.3033	0.108287	0.617989	0.394915	0.000844574	0.492518	0.298152	0.438414	-0.405519	0.505954	0.389124	0.394845	0.44544	0.340926	0.327368	0.461678	0.310198	0.391949	0.500203	0.642513	0.461396	0.386019	0.0538882	-0.308774	0.460157	0.318504	0.402026	0.365563	0.368595	0.379501	0.572519	0.342268	0.349889	0.315079	-0.0203857
cg00114029	0.121852	0.192584	0.188509	-0.0128965	0.000257664	0.0292917	0.197844	0.224276	0.101954	0.155861	0.0858305	0.226232	0.0969303	0.102236	0.41499	0.162243	0.211405	0.332847	0.0545763	0.143258	0.0873529	0.242455	0.0400569	0.203893	0.123662	0.057529	-0.0728023	0.321761	0.236334	0.195619	0.121479	0.112192	-0.0693556	0.154674	0.0908931	0.320828	0.175618	0.0818804	0.0722089	0.0634055	0.121785	0.0771957	-0.0207261	0.148543	0.105145	-0.0607212	0.26413	-0.0375293	0.0237048
cg01240433	0.194877	0.594121	0.459228	-0.26929	0.411712	0.00848155	0.243195	0.493353	0.387182	0.366061	0.385249	0.588286	0.461724	0.573221	0.491468	0.376395	0.553304	0.452524	0.0983125	0.486783	0.315042	0.481355	-0.175653	0.426442	0.444698	0.365672	0.370481	0.365702	0.451408	0.403481	0.330685	0.198199	0.486292	0.55366	0.524935	0.384569	0.252837	-0.220888	0.478914	0.343352	0.412743	0.325315	0.250297	0.321345	0.386255	0.210026	0.397079	0.321454	0.25881
cg03119215	0.127411	0.215848	0.296137	0.0135634	0.159918	0.124122	0.0525546	0.192242	0.210326	0.171879	0.174308	0.156677	0.176106	0.302573	-0.141758	0.0224828	0.197954	0.118542	-0.137831	0.219866	0.0907583	0.132811	-0.244663	0.239067	0.0940603	0.143315	0.0809719	0.248082	0.214961	0.235917	0.196623	0.141389	0.00875352	0.145447	0.216585	0.162402	0.0523999	-0.184478	0.0952942	0.221578	0.217505	0.161135	0.205998	0.0399827	0.210005	-0.0429315	0.175892	-0.0988929	-0.0802933
cg03603977	-0.175563	-0.235378	-0.12773	0.0631276	0.0355208	0.171441	0.00196764	-0.13564	-0.0558597	-0.087279	-0.107982	-0.279877	-0.156067	-0.232102	-0.319427	-0.139589	-0.0963506	-0.284141	-0.0159638	-0.183749	-0.162013	-0.140211	0.0206836	-0.245721	-0.172078	-0.0367928	0.00375636	-0.145847	-0.152971	-0.161994	-0.149727	-0.0455904	0.0142012	-0.114339	-0.227376	-0.178709	-0.182083	0.00241672	-0.144791	-0.237069	-0.334694	-0.184344	-0.059999	0.0178171	-0.0959648	-0.0217197	-0.167512	0.104234	0.0790083
cg03888579	0.163464	0.197746	0.209442	-0.0972346	0.318655	0.0606715	-0.0600029	0.242591	0.179272	0.234076	0.263508	0.194866	0.154175	0.275915	0.0255746	0.115049	0.185069	-0.0215793	0.0938157	0.194198	0.0979798	0.0536812	-0.00528777	0.0931089	0.269385	0.193821	0.0551971	0.096829	0.24479	0.281618	0.060188	-0.0534812	0.254697	0.20412	0.147053	0.119066	0.160479	-0.148056	0.20431	0.313284	0.15286	0.193301	0.193363	0.109644	0.309445	0.155394	0.125272	0.196628	0.213036
cg04031507	-0.0928841	0.101596	0.204559	-0.0330575	0.0651115	0.0251662	0.125347	-0.0237366	0.213736	0.0787896	0.104402	0.091795	0.114644	0.191827	-0.115855	0.162519	0.181587	-0.0227789	-0.256703	0.156319	0.127934	0.125916	-0.191361	0.119468	0.118656	0.103644	0.0960855	0.14373	0.119938	0.196573	0.114526	0.124704	0.126489	0.0952658	0.0418158	0.0882877	-0.0584791	-0.0918223	0.0637227	0.105028	0.135588	0.111554	0.108271	0.101598	0.139605	0.201144	0.117573	0.0729064	0.0545651
cg05879527	0.0704762	0.246207	0.230138	-0.0133027	0.0288845	0.0325781	0.14878	0.200974	0.161921	0.189566	0.229588	0.294331	0.164228	0.223141	0.154751	0.248608	0.248428	0.245921	0.0673126	0.195308	0.194563	0.199495	0.0537217	0.230281	0.349163	0.16809	0.119866	0.150052	0.148106	0.262691	0.163187	0.138616	0.10126	0.262905	0.291523	0.212751	0.205159	-0.0951377	0.210138	0.20387	0.265066	0.278346	0.134552	0.141375	0.166588	0.140064	0.129118	0.0705653	-0.00155578
cg06759265	0.0927978	0.356089	0.217085	-0.181045	0.28688	-0.0774448	0.237325	0.271099	0.173891	0.236388	0.158889	0.242867	0.272171	0.198665	0.362538	0.0430182	0.31164	0.218902	0.0417844	0.241425	0.0774426	0.306527	-0.156278	0.147923	0.067917	0.193447	0.136903	0.182047	0.271555	0.134065	0.129581	0.0478206	0.221898	0.34734	0.356791	0.199391	-0.00752035	-0.163137	0.184064	0.0371818	0.0830828	0.129402	0.0546117	0.112997	0.136515	0.0198546	0.144333	0.219168	0.118588
cg08727443	-0.00691506	0.140972	0.106756	0.162599	0.318142	-0.0545467	-0.0737279	0.182629	-0.00904166	0.130602	0.00822452	0.120163	0.0585085	0.106066	-0.0949178	-0.253711	0.0937888	0.0622807	-0.124507	0.211049	0.113303	0.0416502	0.093752	0.118986	0.0661444	0.155551	0.145295	-0.0697022	0.0586118	0.108795	-0.08765	-0.000366473	0.245319	0.16147	0.0578232	0.172386	0.033669	-0.00328485	0.118856	0.110386	-0.0724825	0.141268	0.0620424	0.116589	0.191496	-0.0825157	0.0280949	0.217426	0.119043
cg09035938	0.0399889	0.228793	0.0640725	-0.18215	0.100712	-0.0324288	-0.0165574	0.00290879	-0.00402301	0.170356	-0.0233336	0.17345	0.151092	0.218798	0.121465	0.104214	0.184594	0.205248	0.0483172	0.0650384	0.0667385	0.126953	0.0456982	0.124359	0.158865	0.0471363	0.138683	0.0128633	0.168774	0.133063	0.0699773	-0.0414141	0.0318221	0.130217	0.214616	0.0670157	0.113481	-0.204175	0.207746	0.113268	0.122386	0.170793	0.0615385	-0.0118472	-0.0682897	-0.0575635	0.176087	0.14449	0.0814967
cg09180520	0.17337	-0.327434	-0.427271	0.187374	-0.365881	0.0268793	-0.109261	-0.129294	-0.402277	-0.340711	-0.275022	-0.335474	-0.305056	-0.448602	-0.086771	-0.206718	-0.282609	-0.0259966	0.159537	-0.392297	-0.215932	-0.17629	0.259291	-0.226213	-0.219297	-0.247765	-0.234606	-0.154535	-0.235322	-0.302277	-0.144095	-0.115598	-0.249105	-0.243666	-0.322507	-0.242662	-0.164396	0.219528	-0.188474	-0.373918	-0.326924	-0.326258	-0.316815	-0.142828	-0.207132	-0.138852	-0.0788786	-0.197724	-0.0144408
cg11951427	0.157992	0.500383	0.332822	-0.234995	0.350248	0.0350163	0.279033	0.420164	0.347253	0.288785	0.331167	0.453255	0.310211	0.403717	0.321874	0.168097	0.438073	0.387283	0.2017	0.320091	0.119473	0.375166	-0.226053	0.337316	0.276715	0.317847	0.343572	0.244625	0.285433	0.292477	0.149623	0.216655	0.372607	0.442534	0.488366	0.252324	0.123925	-0.221047	0.369421	0.268179	0.304441	0.296812	0.242079	0.26049	0.314164	0.197599	0.249944	0.236673	0.0902157
cg13709618	0.257888	0.633373	0.366633	-0.185216	0.234859	0.033123	0.290009	0.47444	0.213213	0.330724	0.331852	0.572671	0.4325	0.482612	0.661941	0.243715	0.510877	0.577352	0.114226	0.377119	0.361641	0.524562	-0.0744944	0.459171	0.402999	0.302913	0.299917	0.3708	0.382744	0.309244	0.287106	0.141701	0.366778	0.529364	0.596812	0.375127	0.209385	-0.141023	0.475621	0.316614	0.327842	0.337223	0.17757	0.265389	0.25231	0.104137	0.382445	0.191293	0.183594
cg14887752	0.220991	0.380824	0.483104	-0.222989	0.279801	0.0648193	0.304411	0.25267	0.481912	0.511194	0.490453	0.423841	0.336118	0.476425	0.179371	0.32019	0.542515	0.350393	0.102999	0.389923	0.153008	0.369717	-0.261459	0.461088	0.345969	0.359256	0.268337	0.262767	0.454907	0.485612	0.288287	0.253031	0.377944	0.586457	0.479787	0.297332	0.199612	-0.409017	0.455865	0.293495	0.424467	0.347173	0.268232	0.298407	0.269445	0.382234	0.322414	0.245327	0.205204
cg15837382	0.242529	0.127417	-0.103847	0.0347179	-0.133784	-0.0261339	0.0332101	0.0338393	-0.148416	-0.0735753	-0.0691565	0.0547718	0.0565268	0.0406103	0.244348	-0.0221291	-0.0634181	0.0952099	0.055384	-0.0678705	0.178535	0.0654958	0.0077652	0.0641176	0.0257704	-0.172955	-0.100673	-0.0277715	-0.0542213	-0.0757125	0.101377	0.0514592	-0.0550355	-0.0503073	0.0932043	0.0936494	0.0121898	0.207463	-0.00518136	0.0229597	0.106348	0.0348857	-0.129659	0.0735732	-0.00255609	-0.0476199	0.0486525	-0.176076	-0.0407071
cg17157516	0.270454	0.147666	0.014651	0.108761	-0.0632828	0.00209219	0.123557	0.139238	-0.0852646	0.118074	0.0162381	0.139813	0.176859	0.0709775	0.355968	0.142699	0.103668	0.237217	0.143949	0.0204386	0.0722681	0.194969	0.0344388	0.0883992	0.0355756	0.0226369	-0.0624781	0.174916	0.0786204	0.0369472	0.269886	-0.0106547	0.0767679	0.135676	0.17249	0.0699635	0.00349551	-0.00102936	0.0526751	0.00200904	0.0480038	0.00763501	-0.0212618	0.0448334	-0.0791825	-0.125656	0.100608	-0.0521398	-0.0653988
cg18113535	0.0887591	0.218547	0.195486	-0.0220059	-0.0680258	0.0380646	0.15556	0.31697	0.0473917	0.146059	0.12389	0.208126	0.0906589	0.0784641	0.362926	0.18569	0.191937	0.2855	0.148308	0.0928796	-0.00812668	0.218072	0.00621306	0.154888	0.126268	0.0677179	-0.0178044	0.14894	0.228345	0.0781687	0.0792883	0.0102309	0.0134513	0.160239	0.140985	0.330882	0.256646	-0.0144441	0.124392	0.0771414	0.169367	0.119245	-0.0976492	0.258211	0.102465	-0.0181065	0.156845	-0.0467788	0.0272877
cg18187144	0.0800529	-0.0888893	-0.296888	0.119302	-0.195154	0.196152	0.139756	-0.236942	-0.264399	-0.129714	-0.200474	-0.206564	0.127877	-0.157141	0.0312644	-0.0801635	-0.184578	-0.0641476	-0.106071	-0.24304	-0.139198	0.0781549	0.0326028	-0.256134	-0.16321	-0.0626298	-0.197808	0.0685917	-0.00346492	-0.0503301	0.0422657	-0.0274311	-0.0105002	-0.154586	-0.102946	-0.30477	-0.158496	-0.0418413	-0.140522	-0.117956	-0.175182	-0.171378	-0.136143	-0.228868	-0.209925	-0.257412	0.0191807	-0.20318	-0.0179186
cg18852567	0.133101	0.426287	0.303539	-0.129206	0.114898	-0.0223335	0.242979	0.302627	0.163975	0.331835	0.255624	0.401694	0.30612	0.299689	0.603139	0.260987	0.370573	0.418893	0.123102	0.271825	0.0942088	0.400657	-0.123524	0.29999	0.210324	0.190238	0.0955803	0.289942	0.332295	0.345068	0.197409	0.135093	0.158059	0.363915	0.380207	0.299839	0.109449	-0.111269	0.281963	0.147326	0.268192	0.277473	0.0867553	0.1956	0.246294	0.0428072	0.261633	0.0828518	0.0689491
cg22800722	0.0502033	0.130853	0.153312	-0.0559796	-0.0290309	0.0684216	0.232906	-0.0507558	0.162138	0.164975	0.131174	0.0477927	0.109456	0.117659	0.0254024	-0.0255902	0.167184	0.0812318	-0.138263	0.058589	-0.0408477	0.159361	-0.203878	0.0779169	-0.0163054	0.122948	0.0743661	0.171273	0.136325	0.0703946	0.0297278	0.132998	0.0789688	0.184623	0.161618	0.0233556	-0.0836456	-0.310552	0.0281272	0.0759557	0.0153822	0.126412	0.085876	0.0771994	-0.0411442	0.108331	0.0815392	-0.00849025	-0.0223746
cg24626851	0.341989	0.645312	0.466243	-0.256168	0.297783	-0.0311679	0.319001	0.453999	0.336681	0.358181	0.456962	0.578543	0.508408	0.588915	0.559592	0.268384	0.615237	0.568068	0.156362	0.443453	0.30686	0.567375	-0.188722	0.479745	0.336571	0.294988	0.313505	0.427695	0.427505	0.388192	0.380243	0.24037	0.45793	0.639962	0.675935	0.386001	0.0851205	-0.277738	0.479001	0.313708	0.356633	0.328722	0.277784	0.302754	0.37788	0.255137	0.409317	0.24534	0.193308
cg26228266	0.12913	0.0599225	0.113463	0.00803295	-0.0314233	0.0574961	0.221059	0.165314	0.107306	0.11131	0.0688962	0.137284	0.0245386	0.0096178	0.342694	0.104101	0.17801	0.293145	0.100073	0.05101	0.0133221	0.158855	0.0488856	0.165469	0.0579065	0.0210229	-0.0637693	0.322267	0.160491	0.142181	0.113444	0.122544	-0.0731119	0.102797	-0.0158506	0.215947	0.128094	0.133939	0.0252816	0.00776921	0.0462528	0.0123209	-0.041784	0.148627	0.110197	-0.00361885	0.267806	-0.0016895	0.00956197
cg26428731	0.00799961	0.159039	0.253208	-0.0658444	0.0768712	-0.0325599	0.167334	0.0305807	0.234406	0.134733	0.158077	0.167527	0.162373	0.240104	-0.0465266	0.192266	0.236946	0.0717277	-0.212681	0.203306	0.183196	0.196009	-0.198685	0.19975	0.162925	0.161002	0.119141	0.201484	0.181182	0.255078	0.171158	0.17554	0.162149	0.171804	0.10799	0.146084	-0.00500422	-0.170291	0.132328	0.151467	0.209099	0.160628	0.134786	0.141381	0.167119	0.241303	0.184021	0.0699166	0.0770055
cg00323695	0.238665	0.184191	0.349589	-0.150695	0.141865	-0.0741002	-0.0475635	0.194182	0.178576	0.226273	0.301759	0.285564	0.0608394	0.277053	0.174548	0.258113	0.36731	0.232121	0.0904784	0.233302	0.202503	0.111902	-0.123194	0.311167	0.204543	0.269215	0.1866	0.134933	0.167267	0.288382	0.128347	0.00681676	0.274366	0.345692	0.213266	0.158169	0.169703	-0.15018	0.280168	0.202071	0.287428	0.0705894	0.178822	0.0747529	0.332913	0.140153	0.176708	0.173777	-0.0106675
cg01519877	0.170692	0.125458	0.377728	-0.0949294	0.280215	-0.075078	-0.0806137	0.201936	0.231708	0.211786	0.207513	0.255964	0.0144945	0.286637	0.0837359	0.173893	0.366675	0.0999206	-0.0395248	0.333219	0.236418	0.0455331	-0.118486	0.238114	0.261301	0.325887	0.186844	0.145645	0.156636	0.309527	0.0856066	-0.0319082	0.321993	0.328552	0.141949	0.205391	0.111322	-0.13829	0.247082	0.204279	0.220735	0.138584	0.199851	0.148452	0.393031	0.10733	0.113366	0.217269	-0.0300683
cg01590848	-0.0230731	0.151226	0.112176	-0.0761442	0.168826	0.0563084	0.127232	0.422214	0.015544	0.178577	0.14306	0.217576	0.0710727	0.0680344	0.0696623	0.0864472	0.144422	0.0774845	0.110645	0.162694	0.167089	0.0924467	0.10316	0.00141517	0.189358	0.144716	0.0541542	0.0790021	0.0877935	0.0496026	0.0633371	-0.0437731	0.193537	0.136812	0.0366211	0.208205	0.183181	-0.034516	0.122511	0.131604	0.0190206	0.130806	0.0317234	0.154236	0.161667	0.125721	0.0740076	0.180425	0.0977029
cg02873868	-0.100395	0.0717203	0.260177	-0.177724	0.216062	-0.153792	0.00791044	0.203658	0.262164	0.180345	0.108525	0.143252	-0.0807197	0.190048	-0.01184	0.00425521	0.243147	-0.0265444	0.0235138	0.146576	0.0907607	-0.0243011	-0.115387	0.237485	0.145127	0.24847	0.177033	-0.117088	0.100262	-0.0922354	-0.153256	0.125903	0.177074	0.194445	0.0418773	0.247114	0.212906	-0.123934	0.122816	0.245192	0.109234	0.176446	0.0233277	0.235347	0.138383	0.205868	0.0323568	0.102822	0.0532581
cg03139057	0.453269	-0.0482363	-0.137986	0.0545646	-0.135016	0.0155124	0.214037	-0.0761053	-0.0544389	0.00483643	0.0113489	0.0194551	-0.0274253	-0.125262	0.289377	0.0195416	0.0956692	0.365575	0.245206	-0.208104	0.0703304	0.184633	0.0948707	0.162878	-0.0956761	-0.117543	-0.036828	0.298304	0.129706	0.00567199	0.209349	0.150768	-0.050028	0.067736	-0.0124126	-0.0629942	-0.0341006	0.224735	0.0490444	-0.0990345	-0.0921911	-0.181193	-0.146314	0.190163	0.000488531	0.0187448	0.308588	-0.0224084	0.0266868
cg03807316	-0.0126206	-0.0467822	-0.102214	-0.0278675	-0.0898288	0.0925983	-0.0546044	0.0630498	-0.11367	-0.0804312	-0.119438	-0.0715396	-0.0910509	-0.0862262	0.0352236	0.0721713	-0.105238	-0.0157419	0.0501979	-0.0680531	-0.103876	-0.0889621	0.172541	-0.123044	0.0574062	-0.0971292	-0.135793	-0.172982	0.0922239	-0.0604237	-0.148119	-0.181866	-0.104036	-0.143517	-0.068802	0.124258	0.0768513	0.00283253	-0.0211956	-0.118527	-0.0295366	-0.0787549	-0.183862	-0.00441032	-0.14593	-0.135578	-0.106944	-0.0715592	0.0446631
cg06664357	0.0984899	0.416843	0.43806	-0.094822	0.453477	-0.167636	0.0598881	0.575636	0.336319	0.328928	0.374214	0.41926	0.254417	0.496805	0.152328	0.0870801	0.45737	0.266341	0.0382212	0.530105	0.180459	0.170635	-0.0852813	0.325032	0.436494	0.42653	0.326577	0.207628	0.278623	0.421461	0.206087	0.0503245	0.410477	0.454354	0.304969	0.330456	0.216528	-0.194136	0.371072	0.295537	0.269712	0.413898	0.324057	0.306369	0.5371	0.206841	0.240025	0.347206	0.210306
cg07640648	0.126317	0.265652	0.310218	-0.105171	0.384251	-0.0263438	0.170766	0.480207	0.26466	0.19589	0.260004	0.352282	0.327001	0.299956	0.109539	0.153086	0.334907	0.205255	-0.0662201	0.40848	0.0529947	0.145043	0.0459949	0.202881	0.313572	0.191139	0.220329	0.266477	0.238445	0.23625	0.2205	-0.110895	0.226313	0.349936	0.235895	0.375413	0.252153	-0.169421	0.34224	0.204651	0.253708	0.287918	0.207391	0.281128	0.167486	0.232183	0.190772	0.333486	0.280619
cg08145231	0.0713797	0.0741441	0.111985	0.0354435	-0.0224736	-0.0987229	0.0331786	0.0249876	0.00353525	0.0164984	0.0586298	0.0231234	-0.100647	0.0826674	0.0550024	0.0542416	0.13563	0.115591	0.066919	0.00225584	0.0499615	-0.0335859	0.0187459	0.0910842	0.0880986	0.106583	0.0743966	-0.000435387	-0.0353247	0.0881714	0.018815	-0.0655496	0.0171838	0.0982332	0.0109822	0.120341	-0.0173526	-0.0118035	0.0617987	-0.0343413	0.0291701	0.0908758	0.0762559	0.016754	0.0900764	-0.0160226	-0.00813736	0.142193	-0.0536521
cg08551532	0.128561	0.01969	0.0918879	0.0032701	-0.167998	0.0783832	-0.150703	0.25725	-0.0979018	-0.0410161	0.00710019	0.0315326	-0.0853474	-0.0546759	0.0390653	0.0706677	-0.0175162	-0.0130291	-0.0121135	0.03623	-0.152314	-0.0674269	0.0468856	-0.0392697	0.0340919	-0.152088	-0.180976	-0.179498	0.0756147	0.00950926	-0.16221	-0.164961	-0.148987	-0.014823	-0.0497272	0.350396	0.115711	-0.0390694	-0.0304834	-0.0647941	0.00328255	-0.00660457	-0.170266	0.0957815	-0.0291183	-0.0578185	-0.13534	-0.0791121	-0.0712613
cg09431525	0.12597	0.251837	0.165478	-0.0616688	0.245368	0.122627	-0.0629415	0.253452	0.126026	0.253022	0.179125	0.190526	0.156033	0.37637	-0.00789535	-0.0491389	0.224342	0.166794	0.0981241	0.26387	-0.0310205	0.167414	0.00460269	0.143712	0.174685	0.218788	0.219768	0.0880698	0.369637	0.323725	0.0850889	0.0707731	0.28361	0.249976	0.198373	-0.010097	0.0237103	-0.189402	0.211266	0.174649	0.16282	0.224018	0.151199	0.000799458	0.355005	0.153722	0.195415	0.116198	0.152094
cg10832304	0.0179986	0.0908574	0.247918	-0.0222959	-0.0078819	0.0621407	0.119107	0.234794	0.151179	0.104607	0.122963	0.169593	0.0295247	0.021152	0.22229	0.146433	0.0955661	0.0988527	-0.0723461	0.156896	0.0495273	0.0601812	-0.0535639	0.099234	0.173282	0.0247454	-0.13057	0.0716096	0.025222	0.0966802	0.0304751	0.0438897	-0.114978	0.087124	0.0301035	0.439915	0.261019	-0.0356163	0.0486484	0.120662	0.197165	0.056406	-0.0170314	0.275554	0.0333635	3.08674e-05	-0.0289288	-0.0609311	-0.0212963
cg11680792	-0.0733424	-0.0654118	0.24099	-0.205411	0.288105	-0.0630656	0.0481291	0.108738	0.307631	0.0509952	0.0952229	0.0605868	-0.0765551	0.173439	-0.150617	0.0810128	0.277467	0.0545977	-0.00460141	0.237827	0.0424213	0.00521452	-0.0816789	0.171565	0.165868	0.253796	0.180804	0.0882003	0.0835383	0.19382	0.015085	0.160076	0.225236	0.210465	-0.0757023	0.13615	0.0602411	-0.0848519	0.183303	0.155945	0.0936304	0.124242	0.178037	0.253677	0.257172	0.213867	0.146011	0.256318	0.0842633
cg14925296	-0.0739013	0.0160056	0.124346	0.0485483	0.0717023	-0.150063	0.157149	-0.123206	0.184571	-0.00731215	0.0851294	-0.0277089	0.162688	0.153159	-0.183469	0.00112443	0.124803	0.0171461	-0.320245	0.1055	0.0801627	0.1345	-0.0560122	0.0905596	0.0118155	0.15793	0.0505431	0.120819	0.136459	0.20831	0.0868174	0.206797	0.101605	0.173176	-0.0685289	0.0329501	-0.0538656	-0.277879	0.0783179	0.0399524	0.0401869	0.0321872	0.109335	0.0700685	0.0318314	0.0953484	0.138962	0.0111257	0.145767
cg15132673	0.0636313	0.139636	0.196734	0.0793751	-0.068903	-0.00780707	-0.106767	0.283164	-0.0139838	-0.0172401	0.00373007	0.126478	-0.023427	0.0710226	0.094647	0.0218517	0.0172334	-0.0898343	-0.213872	0.164984	0.0254277	-0.078038	-0.0324142	0.00258863	0.0675408	-0.0796095	-0.164655	-0.0327626	0.0746675	0.0784592	-0.146699	-0.160711	-0.140758	0.0410291	-0.0115031	0.401637	0.197648	-0.100913	-0.0776936	0.0982553	0.0452411	0.0605492	-0.0885468	0.0668585	0.0745247	-0.0765321	-0.112975	-0.0832167	-0.141794
cg17945053	0.0660285	0.277997	0.353555	-0.256869	0.349825	-0.360687	0.0370398	0.343277	0.269008	0.376808	0.270996	0.249977	0.251417	0.375169	-0.0467544	0.174243	0.308115	0.0574169	0.0843354	0.341009	-0.0673852	0.199619	-0.189174	0.165703	0.261567	0.369588	0.222703	0.197811	0.346026	0.38238	0.179802	0.098359	0.35173	0.38943	0.246762	0.0681991	0.100152	-0.549093	0.242747	0.26017	0.256625	0.346315	0.321393	0.017501	0.375805	0.0222653	0.0971283	0.26543	0.0438161
cg19183842	0.095441	0.530264	0.34886	-0.191723	0.367467	0.088481	0.173673	0.527682	0.224674	0.239208	0.358316	0.53665	0.273444	0.462549	0.382261	0.121704	0.456653	0.302625	0.113525	0.423982	0.314811	0.30357	-0.119383	0.369333	0.293733	0.24802	0.326922	0.24051	0.270924	0.201744	0.130652	0.112056	0.356026	0.449646	0.419327	0.379588	0.265529	-0.028988	0.446008	0.37711	0.242882	0.346319	0.15471	0.320845	0.382582	0.18169	0.295002	0.328171	0.148189
cg21718857	0.216082	0.0706646	0.130333	-0.0346671	0.177926	-0.0478327	0.106263	0.0822005	0.129603	0.124571	0.112697	0.127112	0.0281122	0.0694587	0.176649	0.0304122	0.269764	0.195773	0.0451489	0.0794145	0.106948	0.0764385	-0.0555196	0.168357	0.131245	0.14217	0.0606298	0.159659	0.0272658	0.184565	0.156665	-0.00694689	0.160454	0.214032	0.0663025	0.126889	-0.029388	0.00690704	0.167738	0.0740688	0.0538639	0.0767765	0.152723	0.165797	0.206118	0.0830198	0.103476	0.187624	-0.0172043
cg22174088	0.0117827	0.144186	0.208294	-0.156429	0.0585831	-0.0632044	-0.10784	0.211188	0.093343	0.0204314	0.124279	0.200983	-0.050886	0.0929211	0.0920107	0.0276042	0.199323	0.108854	0.0483152	0.129319	0.209051	0.0345346	-0.151449	0.161119	0.110087	0.136967	0.102117	-0.00602608	-0.0195473	0.11918	0.0421274	-0.0340635	0.0112277	0.169207	0.0883957	0.217457	0.023063	0.0908468	0.10776	0.0756505	0.164419	0.0563936	0.0965516	0.0451999	0.160896	0.0952229	-0.00779439	0.138356	-0.118629
cg25425784	0.150054	0.134185	0.285077	-0.21897	0.150087	-0.0714265	0.00395594	0.189161	0.182948	0.161663	0.26761	0.235048	0.0308728	0.2145	0.103023	0.144794	0.323563	0.204393	0.125028	0.197933	0.168229	0.0854124	-0.14557	0.267217	0.104919	0.239132	0.194118	0.124045	0.0748132	0.235679	0.0780308	0.0395989	0.269913	0.337647	0.161826	0.104614	0.0834529	-0.123139	0.225524	0.075706	0.195988	0.0489587	0.142373	0.102697	0.282524	0.182653	0.136705	0.243524	0.04597
cg26536750	0.121301	0.264825	0.0993429	-0.00961157	0.0947009	0.158723	-0.0513355	0.33347	0.0893822	0.0313072	0.164466	0.273445	0.140156	0.181454	0.103349	0.0137461	0.245206	0.106707	0.0825113	0.15575	0.0906725	0.147567	-0.0205464	0.142084	0.132708	0.0554037	0.179466	0.0661875	0.09498	0.115717	-0.00681369	-0.0248672	0.279768	0.238625	0.228777	0.0245867	-9.14349e-05	0.0171719	0.313714	0.0964153	0.0313389	0.187364	0.0409564	0.0288899	0.284481	0.0234043	0.16299	0.220404	-0.0106466
cg26801047	-0.179157	0.0349642	0.0261779	-0.0771494	0.0360296	-0.087781	0.00299079	0.0442486	0.00923506	0.0272191	-0.0298928	-0.0223055	-0.126206	0.0738809	0.00961414	-0.0198829	0.0327673	-0.0177551	0.103993	-0.0734094	-0.0149549	-0.101816	0.00746939	0.0999219	-0.0620369	0.051041	0.128641	-0.179348	0.0963014	-0.194644	-0.256578	-0.0465608	-0.036439	-0.00192348	-0.0548788	0.0604967	0.165021	-0.0515004	0.0264721	0.0929763	-0.0106401	-0.0286278	-0.104829	-0.000219675	-0.133075	0.0255651	-0.0186062	0.0464988	0.169401
cg02930200	0.110738	-0.114926	-0.154262	0.131448	-0.144667	0.078012	-0.13855	0.0480499	-0.321854	-0.202453	-0.220371	-0.148769	-0.183763	-0.195261	-0.0850566	-0.0916805	-0.204525	0.0117849	-0.0413324	-0.114477	-0.0925301	-0.231408	0.252244	-0.15729	-0.028231	-0.130422	-0.135453	-0.186511	-0.128758	-0.242235	-0.235601	-0.433978	-0.123228	-0.153551	-0.0427234	-0.00331764	0.0772436	-0.0644812	-0.0528828	-0.0909888	-0.180759	-0.0949557	-0.254249	-0.0436439	-0.312096	-0.109991	-0.150656	-0.102749	-0.0290062
cg11397548	0.0171017	-0.0499271	0.154829	0.0106821	0.235227	-0.00328311	-0.00719656	0.238463	0.105475	0.100599	0.0178705	0.0415366	-0.136614	0.00484454	-0.0561489	-0.180642	0.154523	0.166287	0.055433	0.154142	-0.0742999	-0.16073	0.125629	0.140219	0.1203	0.250855	0.258945	0.00365569	0.0295463	-0.0804355	-0.128513	-0.295139	0.177504	0.145652	0.0744002	0.0825352	0.158477	-0.143475	0.165617	0.0134968	0.018459	0.0956223	0.0342728	0.237983	0.0354881	0.149884	-0.0283634	0.339312	0.0934245
cg12696750	0.0043998	-0.232011	-0.114087	0.00625389	-0.0158587	0.106352	0.00305465	-0.000492914	-0.0684733	-0.176115	-0.167322	-0.158532	-0.156567	-0.184228	-0.121864	-0.0541365	-0.0255146	0.0490714	-0.0441953	-0.178773	-0.0743256	-0.16139	0.24025	0.0267075	-0.00289676	-0.0361225	0.0328975	-0.0980913	-0.124253	-0.206478	-0.101213	-0.211389	-0.0494743	-0.0577304	-0.157418	-0.0730213	-0.00787289	0.00478345	0.0327295	-0.150211	-0.220153	-0.179947	-0.159582	0.0299552	-0.227114	0.0602988	-0.0139422	0.0821184	0.067267
cg14830003	0.0740857	-0.159249	-0.0945913	0.242221	-0.0650767	0.20951	-0.3568	0.0417354	-0.261809	-0.171672	-0.218287	-0.160706	-0.311875	-0.215854	-0.0909478	-0.148829	-0.220623	-0.162319	-0.0416382	-0.0812473	-0.0367031	-0.450846	0.237261	-0.134262	-0.146177	-0.0431738	-0.2133	-0.18655	-0.241772	-0.253236	-0.341289	-0.646885	-0.154328	-0.201424	-0.177017	-0.0174048	0.0804537	0.202651	-0.129039	-0.105488	-0.164572	-0.0574758	-0.0543767	-0.145955	-0.189979	-0.264827	-0.266483	0.0290352	-0.136194
cg16109423	0.100687	-0.102737	0.0272835	0.199976	-0.0539675	0.208625	-0.311623	0.223242	-0.140551	-0.106609	-0.0982225	-0.0128413	-0.273719	-0.12279	0.0168935	0.0349783	-0.148913	-0.0927702	-0.00716985	-0.00668965	-0.00275454	-0.385318	0.132965	-0.0619427	0.0259715	-0.0874645	-0.228887	-0.162981	-0.213903	-0.159661	-0.278684	-0.581211	-0.159478	-0.121188	-0.140732	0.180869	0.165354	0.18978	-0.106751	-0.0125942	-0.0151482	0.0769323	-0.0307881	-0.00976932	-0.129541	-0.187835	-0.241669	-0.0211121	-0.171699
cg16532399	0.0943695	0.139008	0.012503	0.0347565	-0.0521616	-0.0235195	-0.030146	-0.00870919	-0.0717622	0.0611254	0.0469368	0.218276	0.126545	0.170145	0.19362	0.177702	0.0245884	0.240773	-0.0358806	0.0430087	0.106101	0.146329	0.120461	0.214293	0.164403	-0.159138	-0.00267207	0.102872	0.141553	0.208542	0.107169	0.00570206	-0.0352636	0.0325005	0.136596	0.0733024	0.190914	-0.0105517	0.183359	0.123309	0.230836	0.0569688	-0.0354832	-0.050587	-0.033993	-0.00526373	0.197487	-0.141002	0.0895171
cg21171625	0.0467196	-0.109048	0.0166893	0.130191	0.000772333	-0.00823073	-0.271374	0.110286	-0.185277	-0.0768753	-0.133821	-0.0472954	-0.257869	-0.160266	0.00146071	-0.00275837	-0.128618	-0.0961692	-0.0283882	-0.0304294	0.00496104	-0.386216	0.173447	-0.0607171	-0.0161873	0.0124184	-0.152263	-0.127638	-0.154548	-0.209833	-0.269213	-0.632863	-0.125804	-0.100264	-0.117914	0.100012	0.161863	0.0577017	-0.062621	-0.0389386	-0.115641	0.040998	-0.044678	-0.0262527	-0.210525	-0.263533	-0.231751	0.0755359	-0.129978
cg21488617	0.0864945	-0.0855919	0.0624674	0.14353	0.051785	0.099684	-0.295326	0.195935	-0.110492	-0.00865325	-0.0737958	0.000516912	-0.246979	-0.0976283	-0.0209604	-0.115431	-0.062353	-0.00733485	-0.0242066	0.0572396	0.0300609	-0.356626	0.106366	0.0144308	0.01299	0.0447224	-0.0761726	-0.0964772	-0.154056	-0.151913	-0.25127	-0.581498	-0.0632937	-0.0457603	-0.0720876	0.100395	0.143697	0.0176846	-0.012231	0.00819268	-0.0459748	0.0805265	0.0350559	-0.0195746	-0.112753	-0.168463	-0.19437	0.11245	-0.133105
cg22128488	-0.140442	-0.130253	-0.117843	0.00912825	-0.276799	0.07619	-0.0379627	-0.182196	-0.205905	-0.142683	-0.237873	-0.225918	-0.36401	-0.164125	-0.0805207	-0.178294	-0.136037	-0.0222892	0.0176662	-0.214905	0.0311963	-0.192068	0.100186	-0.0638835	-0.119895	-0.0446442	-0.0164308	-0.147875	-0.157768	-0.21146	-0.191083	-0.129361	-0.262977	-0.153867	-0.116422	-0.109729	-0.162815	0.0535011	-0.149903	-0.181718	-0.214511	-0.05462	-0.180382	-0.0919909	-0.300098	-0.135085	-0.21348	-0.076734	-0.080818
cg02213260	0.175329	-0.155611	-0.277634	0.252278	-0.139986	-0.0836954	0.214584	-0.0947663	-0.169977	-0.123121	-0.138008	-0.129194	-0.054784	-0.198433	0.114992	-0.268995	-0.0711668	0.177631	0.0849317	-0.214304	-0.0331527	0.0993348	0.167278	-0.0171626	-0.138217	-0.147568	-0.00972037	0.0841609	-0.0715772	-0.143076	0.0905777	0.120453	-0.0521585	-0.0355701	-0.143444	-0.130997	-0.137655	0.156123	-0.0443685	-0.129224	-0.242963	-0.121724	-0.112347	0.0632178	-0.0859046	-0.0412094	0.0893527	-0.0395193	0.0799545
cg07197059	-0.203472	-0.483957	-0.754384	0.372621	-0.54915	0.108207	-0.411381	-0.58427	-0.890642	-0.543068	-0.736687	-0.676748	-0.540459	-0.702457	-0.254944	-0.348216	-0.819572	-0.434119	-0.0428976	-0.694447	-0.267559	-0.538142	0.430773	-0.688989	-0.608249	-0.644399	-0.472796	-0.51532	-0.418262	-0.610049	-0.504809	-0.590796	-0.644423	-0.81378	-0.5335	-0.504798	-0.306356	0.396177	-0.634469	-0.549848	-0.653525	-0.528862	-0.660436	-0.634131	-0.722713	-0.624672	-0.495068	-0.413273	-0.223185
cg11840125	0.0753648	-0.00121244	-0.195274	0.0042182	-0.201119	0.0810051	0.38527	-0.0637942	-0.13279	0.0505542	0.152244	0.0575533	0.0240135	-0.0925464	0.281739	0.0090818	0.0475546	0.241602	0.257814	-0.181787	-0.0877363	0.262973	0.126058	0.0817162	-0.0218751	-0.148977	-0.0543861	0.122473	0.0793266	-0.0529032	0.0893254	0.262433	0.0371772	0.0838627	0.00833923	-0.128402	-0.0476028	0.144361	0.13931	0.0258163	-0.0722228	0.0139604	-0.134191	-0.0244132	-0.0969669	0.0530023	0.2079	-0.0265076	0.13691
cg13011388	0.29037	-0.135236	-0.215586	0.182801	-0.239012	0.292303	0.205385	-0.167848	-0.140398	-0.145055	-0.0854352	-0.0958008	-0.0878508	-0.205267	0.167899	-0.0395184	-0.011516	0.22653	0.0527052	-0.24419	-0.0882748	0.120689	0.17798	0.0651676	-0.157177	-0.203492	-0.0995544	0.213954	0.0204712	-0.0457749	0.106883	0.101263	-0.159232	-0.0604117	-0.169197	-0.103923	-0.0979313	0.401256	-0.0164491	-0.153701	-0.164536	-0.203607	-0.192565	0.0126033	-0.0839	-0.0200745	0.281969	-0.103958	0.0358492
cg14280583	0.0689463	-0.148499	0.0234536	-0.00622457	-0.0466241	0.0216532	0.0341337	-0.173441	0.0540164	0.0189841	0.00863025	-0.08064	-0.0355626	-0.0435149	-0.0990677	0.130109	-0.00713167	-0.0337803	-0.0769089	-0.0843216	0.00963976	-0.051475	-0.00993345	-0.00424072	-0.012094	-0.0229696	0.0445542	0.15631	0.123823	0.139447	0.0823855	-0.0441126	-0.00102249	-0.0596103	-0.0966098	-0.0845327	0.0738282	-0.0736822	-0.0563055	-0.00960875	-0.00378095	-0.155758	-0.034596	0.0438253	0.109787	0.065924	0.0833966	-0.00379631	-0.0882939
cg14370314	0.25229	-0.113829	-0.177813	0.152809	-0.200794	0.210539	0.268693	-0.123854	-0.056514	-0.0961417	-0.0324432	-0.0619599	-0.0552552	-0.153068	0.207547	-0.0671799	0.0538562	0.285488	0.105191	-0.190905	-0.0396966	0.15061	0.154963	0.125561	-0.135286	-0.15997	-0.0649104	0.313784	0.0835323	-0.0119893	0.146593	0.171558	-0.107342	-0.0071268	-0.142904	-0.104966	-0.0964876	0.348859	0.00533593	-0.123542	-0.159024	-0.125783	-0.136695	0.0517927	0.000266917	-0.0158892	0.342959	-0.0506087	0.0122307
cg16585972	-0.132157	-0.163932	-0.280538	0.095363	-0.146294	-0.0826547	-0.167114	-0.167231	-0.339023	-0.132173	-0.204229	-0.250741	-0.211469	-0.292428	-0.0703756	-0.179501	-0.276139	-0.206647	-0.0245624	-0.251905	0.0734638	-0.156623	-0.0114319	-0.280978	-0.246317	-0.281528	-0.136498	-0.23483	-0.26666	-0.254464	-0.18202	-0.138905	-0.179633	-0.29146	-0.216147	-0.197072	-0.278058	0.171822	-0.251016	-0.228629	-0.360366	-0.260996	-0.187952	-0.158713	-0.182488	-0.212264	-0.22505	-0.136824	-0.091594
cg17205324	-0.0699781	-0.333917	-0.573814	0.353798	-0.431618	0.182229	-0.277046	-0.303313	-0.734136	-0.340103	-0.412113	-0.408017	-0.326421	-0.559206	-0.0732385	-0.164736	-0.597137	-0.245478	0.11096	-0.517352	-0.254446	-0.329993	0.326306	-0.49669	-0.415566	-0.518964	-0.37622	-0.366006	-0.359276	-0.427272	-0.302414	-0.428308	-0.370127	-0.558437	-0.325376	-0.381351	-0.245366	0.382674	-0.382424	-0.361802	-0.496992	-0.362587	-0.428899	-0.438574	-0.475803	-0.480358	-0.376723	-0.344187	-0.191753
cg17606785	0.096387	-0.0372428	-0.275614	0.210561	-0.357812	0.244466	0.166191	-0.208496	-0.257445	-0.108359	-0.0921346	-0.118456	-0.0850286	-0.18752	0.13756	-0.11028	-0.168881	0.036399	-0.00319948	-0.296775	-0.100478	0.0592628	0.148667	-0.103585	-0.174163	-0.305914	-0.126175	-0.0652268	-0.075408	-0.0878314	0.0197378	0.0886552	-0.212616	-0.145187	-0.0972924	-0.21626	-0.0886257	0.33397	-0.0761347	-0.104361	-0.0724718	-0.114973	-0.326964	-0.158513	-0.0474268	-0.0881421	-0.00441627	-0.172683	0.0435838
cg18454133	-0.147439	-0.473993	-0.769197	0.377063	-0.579377	0.123484	-0.400985	-0.577751	-0.905442	-0.561538	-0.705814	-0.654056	-0.495994	-0.695199	-0.223379	-0.317513	-0.82125	-0.3864	-0.0112618	-0.694988	-0.264255	-0.498342	0.440818	-0.681973	-0.602779	-0.662363	-0.481263	-0.483525	-0.417315	-0.603217	-0.457751	-0.580501	-0.626742	-0.79727	-0.492392	-0.512105	-0.302627	0.402329	-0.613986	-0.53927	-0.623689	-0.537833	-0.631635	-0.635467	-0.744755	-0.636224	-0.484979	-0.448491	-0.23702
cg18844382	0.28264	-0.0981474	-0.0863353	0.0285101	-0.108601	0.0447822	0.295435	-0.0885762	0.0472732	0.0183415	0.0256636	-0.00705701	-0.0255016	-0.0884959	0.23943	0.0431924	0.13878	0.383992	0.160228	-0.117435	-0.0519878	0.177415	0.110412	0.206448	-0.037304	-0.0618574	0.00512423	0.372871	0.154581	0.0848188	0.198941	0.219548	-0.0751786	0.0698521	-0.110909	-0.0564045	0.00627233	0.192898	0.0592298	-0.0691315	-0.0610635	-0.0599776	-0.0733736	0.109276	0.0291069	0.0598489	0.420653	-0.000275996	0.0878686
cg19736128	0.438233	0.00214	0.0060607	0.00867905	-0.099697	0.0117914	0.238209	-0.0397844	0.0378461	0.0777689	0.0570385	0.0485918	0.0521287	-0.0126006	0.345298	0.103601	0.17927	0.40579	0.204944	-0.101568	0.0167766	0.250087	0.014359	0.214349	-0.0485913	-0.0866982	-0.0155423	0.344002	0.262632	0.106589	0.275108	0.170907	-0.0311483	0.139077	0.0306279	0.015815	-0.0180672	0.145612	0.060512	-0.0462994	0.0132617	-0.0868018	-0.100591	0.162998	0.102284	0.026883	0.368142	0.00305248	0.019257
cg21013866	0.303629	-0.0988958	-0.109391	0.0339453	-0.117834	0.0473647	0.29508	-0.0961532	0.0332558	0.00826863	0.0179445	-0.00950054	-0.0169746	-0.0968837	0.243458	0.0401441	0.127232	0.392024	0.167466	-0.130282	-0.0491401	0.182882	0.125787	0.203702	-0.046074	-0.0886252	-0.0108835	0.379884	0.149081	0.0787613	0.20672	0.212119	-0.0782051	0.0627565	-0.107783	-0.0750101	-0.00374283	0.217374	0.0629292	-0.071988	-0.0733502	-0.0739845	-0.0849138	0.0992163	0.012187	0.0441678	0.429967	-0.0124066	0.0904637
cg24114890	0.260246	-0.122059	-0.185472	0.115941	-0.153093	-0.00449378	0.0669513	-0.305127	-0.266252	0.0251872	-0.145903	-0.245004	-0.0540354	-0.183185	0.0360747	-0.0491727	-0.188399	0.0160078	0.0979724	-0.316372	-0.155172	0.0312406	0.0797842	-0.192285	-0.297711	-0.181503	-0.217147	-0.0491248	0.114875	-0.0634813	0.0285199	-0.0782724	-0.102508	-0.146361	-0.0173696	-0.221332	-0.185313	0.0395288	-0.216906	-0.198877	-0.151259	-0.186791	-0.289506	-0.137575	-0.139593	-0.185993	-0.0192659	-0.160819	-0.0327081
cg00090147	0.095105	-0.196173	-0.403038	0.441998	-0.243931	0.670838	0.0590867	-0.188084	-0.313549	-0.343205	-0.296596	-0.275853	-0.0633632	-0.310312	-0.102979	-0.253385	-0.22428	-0.102372	-0.0693709	-0.308014	-0.160664	-0.0338657	0.251467	-0.232118	-0.215063	-0.296136	-0.189157	-0.0986544	-0.231819	-0.225751	0.0348642	-0.0974282	-0.168007	-0.243679	-0.187136	-0.220897	-0.310267	0.535579	-0.148349	-0.320996	-0.325353	-0.273882	-0.19082	-0.152692	-0.214834	-0.217001	-0.0840873	-0.183361	-0.0700505
cg00397986	-0.0826672	-0.187753	-0.172829	-0.0200692	-0.145249	-0.127604	-0.0217868	-0.16133	-0.183816	-0.269664	-0.163074	-0.193805	-0.116683	-0.240539	-0.17501	-0.0644906	-0.0850341	-0.202497	0.0302282	-0.145206	-0.0787167	-0.134432	0.12392	-0.180615	-0.272743	-0.119785	-0.0836301	-0.10467	-0.241209	-0.111257	-0.101579	-0.0820307	-0.0676425	-0.00526568	-0.187387	-0.12977	-0.159948	0.0592263	-0.105519	-0.342937	-0.303095	-0.134451	-0.123892	-0.110231	-0.270231	0.0264593	-0.105676	0.198898	0.0965044
cg00412675	-0.0127104	0.202305	-0.000603577	0.0333594	0.035991	-0.0500822	0.0955005	-0.0956858	-0.00932913	0.0692944	-0.0605622	0.147049	0.050805	0.107013	0.0701038	-0.0770028	0.103033	0.0583857	-0.143018	-0.0787869	0.034357	0.0199674	0.00250595	0.0604539	-0.0450088	0.0368518	0.0983592	-0.146243	0.0548972	-0.0534108	-0.119931	-0.159786	0.0416447	0.0393716	0.122563	0.0532208	0.0758864	-0.0174363	0.0898396	0.000661778	0.07359	-0.0252803	-0.131298	0.0345192	-0.079616	-0.0128965	0.0699033	0.15509	-0.0390013
cg00595237	0.143854	0.0326041	-0.0984721	0.278531	-0.0845631	0.343048	0.0292783	-0.0370696	-0.0655191	-0.088918	-0.0520831	0.0213229	-0.0391337	-0.105655	0.0174605	-0.147294	-0.0535178	-0.0365096	-0.0115767	0.0331992	0.0326812	-0.0241545	0.101619	-0.0418183	-0.084409	-0.0860594	-0.0755935	-0.0280138	-0.214525	-0.0551938	-0.00998357	0.0377838	-0.0219341	-0.0211404	0.0295949	-0.00166979	-0.043428	0.28949	-0.00673264	-0.0978529	-0.048018	-0.0745065	-0.0455231	0.023765	-0.130256	0.00948905	-0.0122383	-0.0824572	-0.0392239
cg01546563	0.0756471	0.194695	0.189443	-0.122212	0.00572394	-0.167368	0.0120869	0.167584	0.0837243	0.201789	0.214635	0.176899	0.0788034	0.143169	0.0623267	0.0557064	0.134623	0.149786	0.124437	0.0462368	0.0517889	0.109602	-0.223707	-0.0177548	-0.0422614	0.0591189	0.222903	0.000744213	0.148995	0.145094	0.0471672	-0.017811	0.0498272	0.161827	0.212567	0.0343356	-0.0657105	-0.196066	0.113651	0.0340433	0.160798	0.0891535	-0.00788376	0.110474	0.181561	0.101073	0.00906773	0.182328	-0.00405791
cg01644798	-0.159005	0.166096	0.246478	-0.165055	0.349996	0.0138967	0.172714	0.0639483	0.408476	0.251646	0.137002	0.180309	0.228965	0.294243	0.038483	-0.0157425	0.307584	0.0847888	-0.0993084	0.224155	0.0424445	0.170016	-0.222176	0.226384	0.0362876	0.233352	0.263035	0.250637	0.232887	0.266672	0.180369	0.23566	0.266357	0.270048	0.111505	-0.0105726	-0.0673193	-0.0757548	0.113124	0.152429	0.0980432	0.174036	0.229361	0.102105	0.302855	0.172747	0.238154	0.314181	0.0878047
cg02726121	0.253417	0.0399619	-0.0903487	-0.0498229	-0.136485	0.02646	0.0653002	0.0282182	-0.0106633	0.0205515	0.0592431	0.13903	0.140231	0.0152435	0.301734	0.235165	0.0283432	0.152859	0.277495	-0.0261532	-0.103719	0.137061	0.215281	0.0141546	0.173892	-0.0956942	-0.0873944	0.0152743	0.102285	0.0604075	0.161548	-0.00267487	0.160849	0.0828987	0.121951	-0.029392	0.0662167	0.059562	0.1801	0.0531322	0.143873	0.0692121	-0.04722	0.0332302	0.01242	0.11756	0.0896163	-0.00848685	0.0860008
cg03007522	0.182125	0.0744223	-0.0308271	-0.0409029	0.00255188	0.0848117	0.0278851	-0.0159257	-0.0316514	0.107422	-0.0132955	0.00922842	-0.0558442	-0.0436256	0.116425	0.0571072	-0.0309536	-0.0189669	0.142043	-0.125775	-0.0339579	0.0137221	-0.0631748	-0.0111489	0.0192825	-0.0631671	-0.0120837	-0.0417335	0.096494	-0.030747	0.0728017	-0.0593061	-0.138176	-0.0553187	0.103884	-0.0643827	0.0474131	0.101845	0.00326635	0.00116298	0.0401801	0.00121551	-0.137376	0.0436373	-0.0154889	-0.120517	-0.0650958	0.000937038	-0.047853
cg03579045	0.0530463	0.197153	0.0978036	0.0845696	0.068074	0.037833	0.224085	0.0953712	0.120927	0.0817484	0.0508593	0.166448	0.20357	0.209906	0.121053	0.0308257	0.132044	0.264913	0.0361231	0.150235	0.098505	0.24412	0.0486919	0.132135	0.156427	0.0676185	0.165981	0.132027	0.240227	0.115448	0.191058	0.224585	0.15875	0.12105	0.237239	0.104712	0.0584647	-0.217184	0.161823	0.174078	0.123203	0.00513162	-0.0276718	0.119056	0.0691071	0.0357869	0.153882	-0.0195428	0.0486216
cg03628820	-0.126003	-0.0430388	0.0154636	-0.294874	0.109694	-0.0606957	0.107226	-0.0864205	0.159267	0.0929495	0.00420827	0.105131	0.0647225	0.0907707	-0.0933537	0.0651692	0.0527027	-0.0103938	-0.126214	0.0418866	0.0792127	0.0322352	-0.148642	0.106119	0.061431	0.100472	0.061972	0.118738	0.0282088	0.107561	0.0561524	0.139981	0.00475548	0.0460319	-0.0203708	-0.101196	0.0192676	-0.207912	0.0606516	0.0772074	0.101507	0.0365975	0.128246	0.0042327	-0.0372134	0.0900542	0.0863098	0.0804179	0.0852872
cg04233840	0.0757093	0.0763929	-0.0196184	0.02082	-0.0145763	-0.0422302	0.124832	0.081798	-0.00150914	0.0774599	0.139802	0.141473	0.0305028	0.00101047	0.0476439	0.00353462	0.0825554	0.115066	0.163895	0.0126005	-0.0662579	0.0211305	0.033773	0.0569739	0.106792	-0.0282651	0.101138	0.0259725	-0.0698421	0.0278092	0.0501442	0.00867759	-0.0275796	0.0567724	0.0990246	-0.0233339	0.151158	-0.0197463	0.239672	0.0451041	0.169344	0.0997072	0.0477886	0.000951401	-0.00260121	0.144923	0.0371116	0.0870471	0.0976922
cg04880278	0.0726125	0.24009	0.0958217	-0.205713	0.211924	0.110822	0.165416	0.110743	0.274458	0.134738	0.111785	0.28976	0.262807	0.268964	0.199293	0.151959	0.223939	0.145887	0.11678	0.0889413	0.155893	0.220659	-0.0137259	0.210056	0.249587	0.116236	0.22017	0.186878	0.17704	0.105766	0.141283	0.118032	0.18923	0.201857	0.175117	0.023916	0.117415	0.0331461	0.247889	0.206803	0.201897	0.222394	0.19048	0.103144	0.0664439	0.0662228	0.216273	0.250382	0.162985
cg05412333	0.244357	0.239826	0.00431816	0.0591077	-0.185872	-0.117015	0.272837	0.0758199	-0.070948	-0.110581	0.177607	0.184828	0.137022	0.155286	0.206906	0.0247043	0.129263	0.245031	-0.00558472	-0.0302803	0.124663	0.221692	0.0338831	0.180915	0.0980066	-0.0881771	0.0199221	0.274142	0.0564701	0.108612	0.179375	0.141277	0.0297803	0.149082	0.170597	0.0439272	0.0748843	-0.09434	0.224079	0.16809	0.0762729	0.0444298	-0.0288051	0.112744	0.167349	0.00591762	0.215743	-0.0347905	0.00295577
cg05930881	0.0878359	0.0785085	-0.141184	0.0801769	-0.258366	-0.0296729	0.156331	-0.0756098	-0.189888	-0.12592	0.0876423	0.0916527	0.0624526	-0.0185249	0.0183338	0.00313941	-0.0548199	0.0239193	0.0339428	-0.0831683	-0.0628012	0.0769087	0.0176297	-0.0725458	0.0510717	-0.175356	-0.0388548	-0.112885	-0.166415	-0.0162376	-0.0211619	0.025895	0.0628411	0.0296156	0.135469	-0.0603458	-0.0294406	-0.0655517	0.173681	-0.0251452	-0.0100192	0.0249837	-0.0836143	-0.0604814	-0.21794	0.00812574	-0.0382547	-0.115694	0.01124
cg06407417	0.00988806	-0.587879	-0.656381	0.267955	-0.575538	0.20366	-0.195121	-0.629625	-0.577051	-0.439338	-0.434885	-0.62125	-0.287912	-0.621341	-0.156673	-0.143018	-0.582172	-0.259896	0.0521168	-0.887211	-0.441642	-0.321733	0.31903	-0.474202	-0.515566	-0.510101	-0.426997	-0.299093	-0.261653	-0.50697	-0.145969	-0.410144	-0.407793	-0.572278	-0.415642	-0.622371	-0.321113	0.267851	-0.429555	-0.466153	-0.46398	-0.672762	-0.471863	-0.398728	-0.52095	-0.308399	-0.259933	-0.425757	-0.124089
cg06704518	-0.0347462	0.0445364	-0.0781284	-0.0333421	0.0418324	-0.0771019	0.274974	-0.0480012	-0.0750914	0.0473257	0.107474	0.045733	0.123546	-0.0415649	0.0371872	-0.00526491	0.129655	0.0609503	0.104365	-0.0284009	-0.109209	0.182838	0.0591147	-0.0327973	-0.0361286	0.0866369	0.0697169	-0.0101408	0.0580883	0.0397959	-0.00282934	0.0792828	0.261039	0.226587	0.144715	-0.109375	-0.0925443	-0.0703177	0.174908	-0.0350622	-0.146131	-0.0266785	-0.0312437	-0.00710955	-0.0964275	0.0333851	0.0874459	0.283714	0.0807307
cg06707081	0.10652	0.181629	0.0579107	-0.0631739	-0.00659754	0.128269	0.378021	0.108028	0.137883	0.0816099	0.205978	0.243744	0.112022	0.0802802	0.265472	0.198816	0.149076	0.249681	0.0786851	0.0366875	0.113026	0.12518	-0.12201	0.180004	0.191202	-0.0224178	0.0348283	0.178327	-0.0785013	-0.000536294	0.127329	0.182543	0.0281462	0.138638	0.181647	0.0866844	0.11716	-0.043264	0.209108	0.238601	0.154116	0.0977057	0.0578231	0.126875	-0.0787038	0.0480609	0.117006	0.0513577	0.0196561
cg06707765	0.080886	0.25321	0.414346	-0.263193	0.271124	-0.293616	0.0625533	0.192575	0.427048	0.2403	0.232303	0.2974	0.241306	0.30824	0.0932851	0.201015	0.26368	0.144087	-0.125981	0.340116	0.165857	0.186016	-0.307574	0.211085	0.205847	0.317718	0.167615	0.234428	0.248519	0.188809	0.13152	0.0870031	0.130638	0.245073	0.299746	0.265573	0.124286	-0.341714	0.19092	0.205541	0.407881	0.128495	0.174244	0.177122	0.218777	0.240656	0.151645	0.0150717	0.00224347
cg08379586	-0.0431912	0.0455125	-0.0661384	0.16137	-0.00742381	-0.0688382	0.202678	-0.0179029	-0.0230368	0.0398386	-0.00288875	0.0379257	-0.000188964	-0.0301084	-0.0223295	-0.0732045	0.065125	0.0291693	0.0547083	-0.0654976	-0.0589007	0.0411218	0.10213	0.00556122	0.100905	0.0107117	0.185101	-0.061549	-0.0189162	-0.0522041	0.0200435	0.138641	-0.025276	0.0112766	0.0655818	-0.0315723	0.125201	0.0310939	0.155053	0.062519	0.039995	0.0447435	-0.0886441	0.0538354	-0.0156155	0.126614	0.024501	0.0688683	0.0912266
cg09130043	0.145406	0.154336	0.0505229	0.0417398	0.166365	-0.148561	0.039279	0.170313	0.0736635	0.127987	0.0598391	0.0473762	0.0620865	0.0690888	0.074429	-0.163195	0.18565	0.0485375	-0.0110111	0.192752	0.0136827	-0.018379	-0.0703142	0.085416	0.015703	0.146325	0.0360604	0.064911	-0.0670789	0.109419	0.0260367	-0.0601095	0.208867	0.233581	0.112122	-0.00158891	-0.196546	-0.0574998	0.0850931	-0.108383	-0.0836635	0.189191	0.132827	0.00357305	0.121455	-0.0653397	0.0239762	0.204182	-0.0526333
cg09626984	-0.0610059	-0.278077	-0.121685	-0.0230936	-0.12474	0.1917	0.0552014	-0.0638433	-0.0666823	-0.25943	-0.101107	-0.203279	-0.132481	-0.189295	-0.144026	0.189229	-0.189855	-0.0534028	0.00810244	-0.19443	-0.0716618	-0.157117	0.0821872	-0.148268	0.0841322	-0.0900698	-0.171493	-0.0170827	-0.165577	-0.129789	-0.0272148	-0.0892088	-0.180233	-0.211563	-0.18934	-0.0214505	-0.00396887	-0.0326655	-0.0971127	-0.0703014	-0.0821175	-0.13214	-0.0722145	0.0494764	-0.22981	-0.0415393	-0.111014	-0.19559	0.0314066
cg09951349	0.150929	-0.190552	-0.0876806	0.128205	-0.129523	-0.151068	0.18474	-0.173501	-0.0374857	-0.115773	0.0571958	-0.133115	0.0398785	-0.175879	-0.11533	-0.0171812	-0.000550832	-0.124848	-0.0635234	-0.130629	-0.0400381	-0.0399736	0.0708011	-0.0660826	-0.164147	-0.0758433	-0.111846	0.0773115	-0.200961	-0.0191653	0.118571	0.0327238	0.0609521	0.0448165	-0.120039	-0.0855866	-0.0746692	-0.0385187	-0.0193464	-0.177908	-0.113046	-0.200946	0.000357593	0.119555	-0.0604099	0.226271	-0.0192356	0.0128942	0.124366
cg10451078	0.174473	0.171019	-0.0855278	-0.0304384	-0.00713139	0.107835	0.201734	0.143404	-0.0718434	-0.0309701	0.0587323	0.175416	0.166496	0.105121	0.126742	0.103061	0.0270076	0.244805	0.128336	0.00891413	0.0583561	0.17609	0.0770516	0.037191	0.189238	-0.0545218	-0.0332811	0.155891	-0.0247553	0.0944891	0.135377	0.0557258	0.0854096	0.0308936	0.168843	0.0416989	0.0565384	0.013103	0.178736	0.117302	0.0879439	0.0727756	0.0141462	0.0329481	-0.0131114	-0.013696	0.125014	-0.0961289	0.0634875
cg10866709	0.149815	0.123228	0.146352	0.0487461	0.186096	-0.019463	0.183346	0.100919	0.218284	0.0933444	0.234811	0.165189	0.142947	0.0872789	0.0370063	-0.034953	0.150353	0.157501	-0.0770121	0.180948	0.0851446	0.167581	-0.213764	0.110692	0.038204	0.22513	0.13873	0.244293	-0.0169274	0.127554	0.144878	0.120509	0.164868	0.169826	0.175756	0.153186	-0.0389538	-0.0931559	0.187335	0.0174457	0.121128	0.0487808	0.232878	0.280316	0.108211	0.153632	0.129804	0.0428675	0.0410667
cg11048722	0.143486	0.0650422	0.0310875	-0.036466	0.0614058	-0.077425	-0.00731626	0.0416999	0.081841	0.149184	0.0267082	0.0839128	0.0268297	0.0455102	0.140512	-0.10845	0.0238249	0.0936415	0.0700028	0.0479503	0.0208106	0.0973129	-0.147046	0.0460758	-0.043195	-0.0329541	-0.0459787	0.0795183	0.035954	0.0529683	0.10104	0.000460493	-0.0189148	0.0719683	0.0552374	-0.0672117	-0.131443	0.00426379	0.0116973	-0.083045	0.062362	0.162266	0.0146908	-0.0304033	0.0252313	-0.0327017	0.106886	0.0143204	0.00623031
cg11981599	0.290457	0.155672	0.138962	0.0175918	0.0495362	-0.109788	-0.0582592	0.265089	0.027841	0.15546	0.184573	0.179599	0.0536667	0.0689835	-0.00349381	0.0204786	0.111717	0.073613	0.0519771	0.150657	-0.0831449	0.0167145	-0.014619	0.0903587	0.161261	0.0598414	0.0144632	-0.0150625	0.0463761	0.151763	0.0115505	-0.0708544	0.0589294	0.19347	0.166657	0.178503	0.0948826	-0.0624359	0.165795	0.0207671	0.160938	0.223162	0.0010122	0.0957591	0.13797	0.102298	0.00842743	0.0690126	0.0168315
cg12395012	-0.143427	-0.0413567	0.15043	-0.0751895	0.137624	-0.256395	0.236642	-0.115799	0.197365	0.129134	0.025031	-0.0583088	0.0968911	0.0853265	-0.0812424	0.16167	0.0752975	-0.0996929	-0.271305	0.224632	0.0677017	0.0231425	-0.0808538	-0.0743011	0.11036	0.183531	-0.0860903	0.170749	0.118006	0.177406	0.0779922	0.103363	0.184646	0.0246753	-0.03567	0.040797	0.111086	-0.419149	-0.0527577	0.116345	0.0550323	0.090343	0.00776499	0.0976223	0.0607231	0.129517	0.077214	0.0101795	0.0393789
cg12567615	-0.0299105	0.113331	0.450965	-0.0374937	0.237714	-0.190832	0.233675	0.0850979	0.35471	0.265472	0.330019	0.162927	0.223063	0.262761	-0.125268	0.0998526	0.351514	0.0144927	-0.318112	0.332621	0.0773761	0.228828	-0.26283	0.215724	0.110923	0.318813	0.214495	0.240756	0.221429	0.288751	0.191901	0.304059	0.311541	0.398098	0.149359	0.227297	0.0308688	-0.443532	0.201321	0.237414	0.156354	0.137776	0.223396	0.319072	0.303775	0.250432	0.1156	0.145916	0.0162395
cg12637676	0.105878	0.156563	0.23084	-0.0313023	0.209003	0.0401812	0.346221	0.0019741	0.315917	0.362647	0.258865	0.200611	0.306171	0.312528	0.120342	0.28243	0.261214	0.242923	-0.0752689	0.16272	0.0857033	0.23591	0.018388	0.252657	0.307049	0.19052	0.126576	0.298793	0.321053	0.339653	0.288664	0.180324	0.194564	0.21745	0.266154	0.0953488	0.287432	-0.352207	0.267594	0.293682	0.372314	0.073197	0.115589	0.222914	0.225822	0.277337	0.297327	0.0794225	0.326931
cg13166213	0.0704837	0.0805397	-0.126728	-0.0522337	-0.206326	-0.0493972	0.314507	-0.0995194	-0.0914781	0.101658	0.138096	0.130441	0.0642381	-0.0345635	0.221921	0.054968	0.0207078	0.185301	0.128731	-0.13601	-0.0148744	0.1693	0.0346642	0.0661977	0.0891887	-0.140889	-0.0528394	0.0153967	-0.0558635	-0.067017	0.0616087	0.158155	0.0278241	0.0710029	0.150913	-0.0773934	0.0185894	-0.0781336	0.210366	0.131667	0.0883183	0.130994	-0.0249235	-0.0468905	-0.178481	0.0105345	0.0376122	-0.0710205	0.044452
cg13293535	0.0978209	0.171412	0.244872	-0.0825063	0.173196	-0.0892981	-0.102029	0.0813338	0.131732	0.143456	0.0700791	0.152109	0.176196	0.326439	-0.0146851	0.191749	0.208898	0.0459658	-0.096446	0.182803	0.0389402	0.0807086	0.0407805	0.137585	0.166557	0.0824613	0.101328	0.156855	0.374911	0.32328	0.0875365	-0.134771	0.187136	0.199939	0.133554	0.0168184	0.0812657	-0.337429	0.169343	0.147968	0.0922248	0.139895	0.0726769	-0.0708182	0.173957	-0.0179704	0.200541	0.173366	0.121983
cg13434842	-0.0646444	0.0122125	0.0841006	-0.0854844	0.0183759	-0.0793314	0.045505	0.0636924	0.0621019	-0.00597884	0.0749645	-0.0113623	0.00924904	-0.0240285	-0.0704486	-0.0348507	0.0775464	-0.0826057	-0.078117	0.0273721	0.0836145	0.0136591	-0.0762574	0.0714214	-0.00163398	0.149008	-0.0226362	0.0267275	-0.0192066	-0.083747	-0.0868857	-0.0443629	0.0239405	0.0914018	0.0162052	0.132166	0.00781521	-0.26205	0.0364014	0.00357942	-0.040061	-0.0148457	0.176539	0.0748555	-0.00957531	0.0792237	-0.104066	-0.0820587	-0.0363996
cg13680188	-0.0231932	-0.0352904	-0.075881	-0.136614	-0.0545101	-0.217897	0.226302	-0.0668898	0.00890714	0.0804012	-0.0520471	0.00462308	-0.0464813	-0.0122167	0.0536162	-0.044074	0.023763	0.0943646	0.113692	0.0245467	-0.0207118	0.0102659	-0.0410984	-0.00234568	0.0511841	0.047491	0.0607116	-0.033916	0.0363618	0.000248746	-0.0479185	0.142208	0.0793057	-0.0161166	0.0506815	-0.0322114	0.0942895	-0.135712	0.0385225	-0.0308093	0.116097	0.00804442	-0.112529	0.0015127	0.0627642	0.0754914	0.015439	0.0318014	-0.00160728
cg14379719	0.301217	0.193964	0.0344309	-0.0281282	-0.0160785	-0.0703962	0.0300025	0.104529	-0.0468508	0.0846387	0.190121	0.215827	0.0541373	0.0690329	0.162	0.0417286	0.111316	0.162469	0.294109	-0.0125152	0.126263	0.135199	0.132011	0.109947	0.039009	-0.0331561	0.112424	0.0859773	0.0477518	0.105989	0.0930248	0.00517263	0.0517669	0.241979	0.194657	0.020301	0.114144	0.0331617	0.252799	0.0653238	0.0436383	0.155136	0.0288891	0.0384191	-0.0210862	0.00385716	0.0916866	0.200536	0.0746432
cg14487356	0.120194	-0.018291	0.0142021	0.0119432	0.0289426	-0.127959	-0.0484914	0.0913421	0.0053851	0.0881439	0.0464738	0.0614295	0.0301292	-0.016778	0.00922212	-0.0780719	0.035349	0.0490313	0.141867	0.0219357	-0.197822	0.0246402	-0.0323243	0.0291521	0.0173561	0.0343107	0.0739658	-0.094948	0.0468663	0.0290264	-0.00426155	-0.0795042	0.0969323	0.112497	0.073893	0.0433656	-0.0579991	-0.145754	0.0684104	-0.101246	0.0303996	0.0258266	0.0172752	0.0941938	-0.00626866	0.121801	-0.0714469	0.128215	0.0429366
cg14666113	0.0040159	-0.0892854	-0.110896	-0.0324127	0.00757728	-0.0338305	-0.0119958	-0.023077	-0.0925285	-0.0674402	-0.0698633	-0.0443707	0.0571727	-0.0151589	-0.0194109	-0.109085	-0.0601025	0.0583617	-0.0298752	-0.102481	-0.0930661	-0.0316486	0.0884711	-0.0190671	-0.1483	-0.136457	0.0451866	0.0356278	-0.059352	0.0189108	0.0794663	0.019235	-0.0735142	-0.0527517	-0.0589249	-0.151491	-0.191687	0.0190781	-0.0610779	-0.130846	-0.132726	0.00278487	0.0178122	-0.0794574	-0.0657159	0.0154814	0.0420721	-0.0087819	0.18534
cg15644626	0.0406804	0.017895	-0.137887	-0.0248992	-0.0955928	0.0156442	-0.00191888	-0.251275	-0.123649	-0.0376463	-0.118329	-0.111528	0.124784	0.0222304	-0.0718144	-0.0649912	-0.106416	-0.155174	-0.165299	-0.23162	-0.154002	0.0363527	-0.0249567	-0.2294	-0.189512	-0.139982	-0.041218	-0.101941	0.180188	0.0169029	-0.0240404	-0.141496	0.0459285	-0.0902896	-0.0119296	-0.314607	-0.212227	-0.0988644	-0.0776769	-0.135136	-0.111587	-0.165538	-0.314204	-0.240443	-0.0604523	-0.0370955	0.0535338	-0.0427089	0.0112225
cg16795466	0.233799	0.0428935	0.015119	-0.0410284	-0.0470419	0.108018	0.262294	-0.0740589	0.155106	0.0969295	0.0807351	0.0619592	0.30543	0.182858	0.0453771	0.118416	0.214746	0.178701	0.0894739	0.0122408	-0.0697616	0.297341	0.0484469	0.0786774	0.174369	-0.016214	-0.0257693	0.0618681	0.254677	0.199106	0.34333	0.136907	0.257443	0.199612	0.277896	-0.0544326	-0.0218099	-0.154232	0.2291	0.0952624	0.210015	0.0672294	0.0135825	0.0584201	0.131224	0.194932	0.20921	-0.0535801	0.0485406
cg16803596	0.156394	0.0399186	-0.0969629	-0.108347	-0.0727082	-0.0811707	-0.103734	-0.0140028	-0.165435	-0.105811	-0.0668352	-0.0425472	-0.0309452	-0.0881262	0.104503	-0.11936	-0.0404331	-0.028609	0.184369	-0.10757	-0.121143	-0.0495937	0.0712231	-0.0556582	-0.210727	-0.0920906	0.0253036	-0.0949906	-0.0791881	-0.0941644	-0.089556	-0.0583547	-0.0420366	0.0885532	0.0168428	-0.106485	-0.0574817	-0.00373243	0.00103672	-0.116383	-0.188538	-0.0320933	-0.116405	-0.0582707	-0.169618	-0.0808073	-0.0827375	0.119117	0.0154549
cg16810626	0.193779	0.312424	0.213399	-0.150267	0.0565835	-0.226349	0.178287	0.0590744	0.118572	0.369133	0.258726	0.369668	0.286792	0.347157	0.333296	0.299222	0.202916	0.36352	-0.0182981	0.131399	0.138926	0.171702	-0.0254279	0.326313	0.266215	0.129934	-0.0306307	0.135132	0.409983	0.33016	0.139338	0.00912449	0.134134	0.203567	0.380066	0.202305	0.262555	-0.280501	0.281235	0.276275	0.447241	0.201571	-0.006734	0.0481418	0.129895	-0.0134423	0.263913	-0.186211	0.0410475
cg16816874	0.00605652	0.168307	0.0785259	-0.0162311	0.117575	-0.0481898	0.0226264	0.119865	0.0362266	0.117182	0.0999972	0.135783	0.0922118	0.194509	0.173666	0.145591	0.0168491	0.162693	-0.0250101	0.130262	0.146841	0.0227374	0.025761	0.0724831	0.163782	-0.0249852	-0.0368412	0.0963904	0.193829	0.0610129	0.0552657	-0.141131	0.0987522	-0.0185975	0.156587	0.0851386	0.155464	-0.145489	0.122659	0.218256	0.106163	0.00605057	-0.0259081	0.0345752	0.101653	-0.0548201	0.0732324	-0.0848506	0.0915533
cg17795240	-0.0466591	0.153256	0.153034	0.0226428	0.198846	-0.0734097	0.115943	0.264537	0.121719	0.257349	0.152552	0.184712	0.0353676	0.128562	0.25711	0.0765968	0.224837	0.179402	0.196067	0.230939	-0.0437978	0.00681854	0.0415753	0.145862	0.177702	0.18249	0.104809	0.0533235	-0.0178632	0.069449	-0.0243022	-0.0746997	0.182628	0.176557	0.148347	0.12713	0.15066	-0.0744651	0.227166	0.0740672	0.0812731	0.131636	0.189407	0.0989525	0.114445	0.121555	-0.00607836	0.292977	0.130448
cg18119192	0.0519317	0.09517	0.0629271	0.162971	-0.0971983	0.173331	0.0430701	0.00937178	-0.0160661	-0.0582155	0.110174	0.0456501	-0.0622137	0.049601	-0.0881517	0.0225025	-0.0230161	-0.143709	-0.00821984	0.0314205	0.0557735	-0.0258209	0.017934	-0.0628706	0.059465	-0.0236512	-0.0532596	0.0485464	-0.0134786	0.20704	-0.0411897	0.0424354	0.0445432	0.0261492	0.017205	0.00332729	0.0811806	-0.0752377	0.021158	0.0456556	-0.0665837	0.119635	-0.0754399	0.0598854	0.101702	-0.0542711	-0.0492813	-0.00824027	-0.132355
cg18123948	0.0279255	0.125517	0.0121427	-0.0730984	-0.0259348	0.0629018	0.335591	0.135438	0.0705088	0.0839116	0.217954	0.234199	0.0528965	0.0183886	0.267474	0.224745	0.109834	0.24402	0.176803	0.0121474	0.136151	0.0947018	-0.0367993	0.16034	0.217089	-0.0264309	-0.00377067	0.132148	-0.133686	-0.0482295	0.112376	0.125674	0.00360083	0.0974727	0.161227	0.110103	0.214548	-0.0206493	0.226274	0.215147	0.197639	0.0922307	0.065241	0.152234	-0.0798577	0.0894519	0.0668908	0.0224992	0.0496633
cg18127003	-0.00703353	-0.605227	-0.652363	0.254867	-0.547639	0.173163	-0.220908	-0.610016	-0.576882	-0.415606	-0.446762	-0.634589	-0.324348	-0.624951	-0.190064	-0.179421	-0.604229	-0.292293	0.0535796	-0.857144	-0.440461	-0.36482	0.284578	-0.52589	-0.526802	-0.503212	-0.430331	-0.310332	-0.2869	-0.500388	-0.16394	-0.463558	-0.422774	-0.598209	-0.428293	-0.638898	-0.332502	0.240171	-0.468277	-0.497637	-0.454636	-0.655479	-0.471069	-0.437544	-0.523907	-0.285699	-0.293255	-0.414243	-0.139297
cg19172575	0.0362149	0.0884074	0.166513	-0.212953	0.14121	-0.149895	-0.106519	0.174253	0.130016	0.209499	0.209981	0.130457	-0.0485293	0.143777	0.00691754	-0.0600842	0.172431	0.181165	0.247152	0.21437	0.056311	0.0597206	-0.00866395	0.124707	0.181534	0.266677	0.256649	0.00885178	0.116587	0.201746	0.0197664	0.107646	0.237198	0.203891	0.0638253	0.0483948	-0.0239584	-0.100155	0.188318	0.0649916	0.148656	0.289833	0.16872	0.108036	0.221027	0.0777772	0.056656	0.24694	0.14446
cg20279283	0.0498651	0.00430875	-0.0346073	0.0184781	0.0222496	0.148128	-0.0829767	0.122363	-0.0389333	-0.0570741	0.0120702	-0.0212169	-0.0634001	-0.0464474	-0.0852991	-0.221018	-0.00998646	-0.0971476	0.0181556	-0.0248786	-0.0130337	-0.100409	-0.0286313	-0.0515125	-0.067985	-0.00438209	-0.00417808	-0.0937127	-0.117514	-0.102967	-0.0997149	-0.19687	-0.0201332	-0.0031841	-0.0373029	-0.0200665	-0.100648	0.0110219	0.0302077	-0.106101	0.000393111	0.0077175	0.0360997	-0.0922825	0.0161408	0.027659	-0.122434	0.0859214	-0.0481565
cg21073927	0.0935574	0.0520437	-0.0880046	-0.111803	0.0478266	-0.115163	0.228333	0.101254	-0.0410802	0.0978741	0.182458	0.074606	0.168938	0.0140466	0.102015	0.000537683	0.0854317	0.12376	0.164143	-0.0678371	-0.118166	0.227925	-0.0602205	-0.0383089	0.00889037	-0.031777	-0.0370855	0.0148269	0.0320599	0.0945034	0.180695	0.0842752	0.156786	0.170139	0.10232	-0.11706	-0.12862	0.0859585	0.175496	-0.0199808	0.0246454	0.118609	-0.00866954	0.00595197	0.12931	0.0615615	0.0855504	0.134698	0.159338
cg22320962	-0.0217018	0.140676	0.00377737	-0.000327777	0.1012	-0.148065	0.251202	-0.0375665	0.0646103	0.0756555	0.0607804	0.166301	0.208243	0.0206041	0.154592	0.116272	0.101845	0.182967	-0.202035	-0.0030898	0.117507	0.178864	0.0047913	0.143332	0.10939	0.0370073	0.149784	0.166647	0.0316399	0.0565101	0.159886	0.117089	-0.0202359	0.0793179	0.168402	0.0615345	0.108726	-0.0779504	0.18326	0.121122	0.109946	-0.0696947	-0.00379571	0.0988196	-0.0822067	0.0590272	0.136294	-0.0439406	0.0331796
cg23916205	0.0726994	-0.461264	-0.570014	0.257218	-0.538873	0.292162	-0.183086	-0.507577	-0.502699	-0.373779	-0.336918	-0.464985	-0.231638	-0.559225	-0.0292922	-0.0585811	-0.482965	-0.150085	0.109234	-0.810256	-0.377771	-0.204982	0.292281	-0.326697	-0.435024	-0.482553	-0.349938	-0.213464	-0.250247	-0.476267	-0.0934206	-0.328341	-0.3556	-0.470365	-0.329946	-0.50949	-0.252278	0.275474	-0.311749	-0.366185	-0.40141	-0.61661	-0.360229	-0.324128	-0.472934	-0.283212	-0.176242	-0.401252	-0.151713
cg23972785	-0.0736228	0.0460229	0.390367	-0.128274	0.29674	-0.254782	0.0167323	0.0208873	0.451193	0.288575	0.146138	0.104438	0.139946	0.272897	-0.120638	0.0462932	0.314683	-0.0787879	-0.24886	0.350903	0.0430986	0.0958757	-0.305584	0.204423	0.0851256	0.334236	0.24033	0.187678	0.288916	0.29841	0.133107	0.202296	0.217787	0.26518	0.0440842	0.0973816	0.0336215	-0.303867	0.0538541	0.092173	0.240404	0.21424	0.217027	0.13382	0.336509	0.163998	0.153438	0.253771	0.0415454
cg24387126	-0.0926632	0.125967	0.0210811	-0.0998709	0.147121	0.127831	0.147244	-0.0687305	0.139595	0.111409	0.0127731	0.0934734	0.120942	0.160827	0.0927082	-0.0664582	0.0873037	0.0593248	-0.0236376	-0.047435	0.0113735	0.06952	-0.0691407	0.0756795	-0.0343886	-0.0333415	0.152	0.109244	0.137088	0.0526105	0.0839689	0.0573688	0.00800635	0.0705972	0.0923789	-0.117864	-0.0952261	0.166085	0.0342077	0.123575	0.00262018	0.160822	-0.0228256	-0.0245003	0.0519841	-0.0164169	0.117444	0.189182	0.0402326
cg24646414	0.0780339	-0.00615461	0.0267895	0.0774244	-0.0376722	-0.0448254	0.131857	-0.171951	0.00880542	0.0767102	0.158626	0.00725136	0.0903016	0.175603	-0.0535087	0.189496	0.0819293	0.0812036	0.0856147	-0.0695193	-0.148355	0.0967764	0.263786	0.0101044	0.200471	0.0352097	-0.0654148	-0.0858643	0.27666	0.22247	0.154303	-0.0354584	0.176708	0.135464	0.119191	-0.0484031	0.0961348	-0.0936137	0.146029	0.0793193	0.150671	0.0697573	-0.0854295	0.072566	-0.0165709	0.240687	0.135922	0.0405843	0.27576
cg24738627	0.125085	0.143564	0.17046	-0.15239	0.222268	-0.171117	0.103914	0.172841	0.0944776	0.0685908	0.161107	0.121732	0.112331	0.182646	-0.0112284	0.0149062	0.2019	0.144209	-0.0419132	0.240153	0.239256	0.0749789	0.0221196	0.0748088	0.0786245	0.0692287	0.16169	0.259291	0.038304	0.138345	0.141436	-0.0867989	0.190288	0.218969	0.147402	0.0475935	0.0198304	-0.127205	0.226089	0.178896	-0.00285388	0.0535365	0.120946	0.12792	0.180122	0.0543749	0.12566	0.357899	0.170512
cg24910352	0.117765	0.436346	0.337483	-0.228865	0.106907	0.00076131	0.190034	0.184238	0.32989	0.277588	0.31082	0.466202	0.272467	0.399185	0.389274	0.13124	0.371368	0.296829	-0.0517857	0.266477	0.189727	0.329796	-0.331296	0.307442	0.25	0.277777	0.193025	0.190152	0.234036	0.301895	0.0705492	0.193015	0.289325	0.366046	0.449697	0.176519	0.0807112	-0.269966	0.341482	0.245708	0.359033	0.217325	0.081462	0.172306	0.271713	0.163299	0.279863	0.0830955	-0.0631968
cg25216696	0.126942	0.0879196	0.136625	-0.0583404	0.0815105	0.0209622	-0.0870318	0.162651	0.00791314	0.0450259	0.0812572	0.087148	0.0185615	0.0903931	0.158537	-0.0543877	0.0890499	0.119759	0.0993695	0.0602376	-0.0526012	0.00886334	-0.0165173	-0.0322853	-0.0209422	-0.0256262	0.0691984	-0.0704876	0.00645594	-0.00651485	-0.0716134	-0.135382	0.0518045	0.158761	0.154079	0.203796	0.0441103	-0.107211	0.0385993	-0.00766965	0.0182314	-0.0868664	-0.0480145	0.174171	0.00458549	0.118895	-0.0863766	0.174931	0.0637275
cg26020513	-0.00126823	0.0512501	-0.0940907	0.059384	0.0272456	-0.123767	-0.0111482	0.0171082	-0.152424	0.0387077	-0.0189096	0.011281	-0.0547917	-0.0298493	0.0770646	-0.0690344	-0.0429573	0.17912	0.178648	-0.106475	0.00681199	0.0223492	0.208581	-0.0717312	0.0488451	0.0469035	0.202171	-0.14065	0.00349126	-0.171954	-0.113823	-0.00970023	-0.0452642	-0.0562804	0.0544119	-0.0603608	0.109315	0.0419844	0.0695236	0.0680783	0.00586781	-0.0685226	-0.0806628	0.0596648	-0.122725	0.00676692	0.00473927	0.0754306	0.211185
cg27100236	-0.0892836	-0.119514	-0.181547	-0.0255951	0.000316739	-0.0153287	-0.139963	-0.0526277	-0.0849888	-0.106888	-0.177285	-0.0891675	-0.0842501	-0.057893	-0.0588956	-0.0803157	-0.174652	0.0172191	0.0337518	-0.109229	-0.174048	-0.121809	0.139089	-0.142512	-0.0287169	-0.117378	-0.0277813	-0.129799	-0.111316	-0.0717414	-0.0967386	-0.0543777	-0.139046	-0.151964	-0.117219	-0.126669	0.0152907	0.0798157	-0.13156	-0.0592509	-0.112827	-0.108026	-0.114201	-0.157369	-0.188375	0.1778	-0.00213179	-0.00344055	0.238306
cg01577933	0.233121	0.422148	0.421019	-0.28847	0.0810905	-0.057636	0.185854	0.228927	0.298296	0.295388	0.501535	0.402379	0.421489	0.410003	0.317442	0.284671	0.495366	0.366555	0.118394	0.267019	0.138979	0.48666	-0.334259	0.295811	0.16539	0.18859	0.209415	0.313283	0.28897	0.373154	0.418148	0.196259	0.341961	0.5777	0.539417	0.166153	-0.0791795	-0.211025	0.392287	0.142411	0.288945	0.272996	0.28425	0.225481	0.250586	0.102557	0.294657	0.264662	0.0348013
cg03149432	0.381457	0.0509696	0.0514066	-0.00740596	-0.19057	-0.0817099	0.27136	0.0190438	0.0388242	0.0898642	0.154395	0.0925576	0.0641085	-0.031995	0.302024	0.146749	0.0608596	0.238239	0.153056	-0.03182	0.0829019	0.228576	-0.12442	0.0838612	-0.024368	-0.076047	-0.109149	0.207596	0.152387	0.0893035	0.191509	0.159612	-0.00306139	0.107592	0.115747	0.0899476	0.0240221	0.0511913	0.0282717	-0.0570401	0.177764	-0.0908191	-0.155559	0.137909	0.109734	0.0989171	0.147839	-0.126051	-0.0394788
cg03654504	0.0216691	0.323621	0.523783	-0.433513	0.363949	-0.0588739	0.355901	0.267812	0.546878	0.555315	0.467879	0.379159	0.365041	0.440137	0.16745	0.255897	0.53485	0.315781	0.0770837	0.44178	0.0407408	0.371448	-0.351632	0.441394	0.280817	0.437556	0.350488	0.428717	0.451191	0.407903	0.357326	0.33223	0.347342	0.547134	0.366418	0.225078	0.180636	-0.387177	0.384887	0.365873	0.412821	0.407985	0.352211	0.294229	0.334437	0.27386	0.34814	0.353033	0.200896
cg04364463	0.439776	0.530598	0.284771	-0.121321	0.0373417	-0.107529	0.208481	0.189734	0.115953	0.316008	0.345973	0.381098	0.413954	0.434161	0.54851	0.195074	0.339401	0.466403	0.146701	0.252953	0.293258	0.520756	-0.218267	0.254398	0.15227	0.00473279	0.0558869	0.231041	0.376879	0.271967	0.318528	0.149405	0.261077	0.425754	0.597356	0.269935	0.0226088	-0.230772	0.256287	0.207231	0.354902	0.210229	0.0543553	0.139196	0.193074	0.0550877	0.28235	-0.00427431	0.0190225
cg04509024	0.0495658	0.149788	0.191811	0.0569425	0.22928	0.0995016	0.215631	0.068842	0.337508	0.306763	0.201564	0.185694	0.162196	0.277514	0.0672468	0.148787	0.288664	0.154639	-0.0150075	0.237343	0.134878	0.176356	0.0322232	0.237442	0.235285	0.24867	0.20536	0.211804	0.22916	0.24142	0.13855	0.200913	0.234592	0.2846	0.162938	0.0947442	0.2433	-0.28394	0.236379	0.215298	0.262649	0.219756	0.197345	0.167434	0.0995843	0.296674	0.213004	0.192438	0.251628
cg04510788	0.37687	-0.0869205	-0.0952272	0.0633334	-0.152161	0.00820397	0.258096	-0.0733349	-0.000133991	0.00164255	0.00376282	0.00393245	-0.0248247	-0.112897	0.246185	0.0258212	0.113709	0.390552	0.190086	-0.138942	-0.0401291	0.187974	0.119419	0.173978	-0.0501667	-0.0769165	-0.0265244	0.354868	0.151766	0.0645914	0.205389	0.179762	-0.0654416	0.066565	-0.0681644	-0.0484092	-0.0170026	0.1873	0.0442698	-0.11387	-0.061059	-0.100872	-0.123019	0.126987	0.0180046	0.0227938	0.379647	-0.0283758	0.0390945
cg06165395	0.173157	0.440203	0.400707	-0.291582	0.113517	0.0109611	0.185648	0.246116	0.275502	0.271758	0.351228	0.375423	0.363286	0.483039	0.202868	0.101457	0.453963	0.346797	-0.0252247	0.343176	0.0508461	0.400478	-0.285213	0.309418	0.173899	0.234597	0.261316	0.234144	0.375088	0.432267	0.294271	0.209625	0.312979	0.48927	0.470964	0.15633	-0.102696	-0.144182	0.354973	0.124692	0.317318	0.328725	0.157129	0.159629	0.350162	0.1644	0.330915	0.259132	0.114956
cg06722633	0.132335	-0.0861144	-0.151343	0.146562	-0.331521	0.0395723	-0.122254	0.0165298	-0.219033	-0.255715	-0.174042	-0.0547244	-0.101149	-0.16566	0.114584	-0.00163906	-0.232772	-0.064566	-0.0443015	-0.145891	-0.0522844	-0.0781944	0.0772826	-0.130693	0.0063796	-0.174219	-0.220636	-0.0614756	-0.139943	-0.0491948	-0.064367	-0.139623	-0.205148	-0.195881	-0.120664	0.00834895	0.0324725	0.107544	-0.12047	-0.136743	-0.0633781	-0.128554	-0.224161	-0.0969266	-0.130973	-0.177918	-0.066134	-0.310381	-0.119026
cg08004425	-0.108058	-0.0813676	-0.133862	0.113828	-0.00460345	0.257407	0.0873076	-0.0602736	-0.146761	0.00121853	-0.0442852	-0.149747	-0.144705	-0.164954	-0.157692	-0.0998946	-0.111118	-0.0874677	0.138579	-0.122555	-0.0171922	-0.145024	0.118076	-0.159734	-0.0610497	0.03302	-0.0553412	-0.0661258	-0.0594345	0.0127532	-0.147575	-0.0515063	0.0538263	-0.13595	-0.032886	-0.0651624	0.0355238	0.0402744	-0.0872987	-0.164692	-0.241128	-0.117104	-0.0748829	0.0273964	-0.0761447	-0.11358	-0.106541	0.0027253	-0.0605876
cg08106961	0.219093	0.334788	0.479589	-0.223789	0.459952	-0.0899362	0.328751	0.287177	0.536453	0.54471	0.544366	0.444024	0.497908	0.50646	0.171791	0.294736	0.59197	0.403509	-0.0234616	0.429783	0.0303824	0.482751	-0.261651	0.427803	0.420956	0.431366	0.350956	0.428077	0.518678	0.540809	0.457867	0.342017	0.481086	0.630458	0.432465	0.199252	0.104231	-0.507585	0.482451	0.357241	0.432606	0.310344	0.393039	0.324662	0.373469	0.33253	0.442137	0.297978	0.311615
cg09134640	-0.00133842	-0.0234196	0.094854	0.0685678	0.095964	0.0822323	-0.0784565	-0.0440966	0.137369	0.109071	0.0267698	-0.00385356	0.0329536	0.0952568	-0.162132	0.0338721	0.0504945	-0.149023	-0.067343	0.0960385	-0.0623536	0.0318037	-0.024489	-0.0370008	0.0280556	0.140682	0.0565272	0.118928	0.0737598	0.150709	0.0547372	0.050925	0.0892943	0.0439668	-0.05145	-0.143233	-0.0303094	-0.238224	-0.0340964	0.00153888	0.0398677	0.0486018	0.18605	-0.119383	0.0608	0.0243125	0.0176355	0.112518	-0.0260282
cg10206594	0.0526019	0.218068	0.345072	-0.0148539	0.24738	0.11478	0.161282	0.0450362	0.331108	0.256975	0.245585	0.214739	0.288569	0.367242	0.0312674	0.172276	0.396447	0.091599	-0.159139	0.269154	0.117184	0.26565	-0.0930339	0.278196	0.233288	0.262731	0.239465	0.269496	0.307393	0.291498	0.223262	0.183822	0.305235	0.388919	0.266147	0.123993	0.0668463	-0.339597	0.266866	0.26034	0.172061	0.203511	0.286974	0.206271	0.145866	0.188772	0.265949	0.202682	0.123531
cg11836212	0.207352	0.0964097	0.00581663	0.0898276	0.233465	0.133864	0.108233	-0.000135429	0.140204	0.0901632	0.123043	0.0390598	0.182038	0.159009	0.0781577	-0.0272018	0.256445	0.181559	0.0461342	0.0866894	-0.0442551	0.172543	0.0638167	0.150081	0.0293339	0.174256	0.139136	0.125758	0.164995	0.165688	0.193231	0.0632081	0.257612	0.28591	0.101172	-0.0396938	-0.051981	-0.0665779	0.191242	-0.0249095	0.0273177	-0.170161	0.2044	0.0369129	0.108903	0.241963	0.239106	0.199958	0.274353
cg13272644	0.0186949	-0.128342	-0.21864	0.183245	-0.224006	-0.0648908	-0.179709	-0.197472	-0.316119	-0.217518	-0.259709	-0.182592	-0.208197	-0.161954	-0.0857247	-0.137361	-0.281434	-0.153672	-0.0406413	-0.201285	-0.0640953	-0.204611	0.0535769	-0.204481	-0.201598	-0.24814	-0.204328	-0.192895	-0.250138	-0.197615	-0.219223	-0.25998	-0.193548	-0.257476	-0.174608	-0.078738	0.028767	-0.026427	-0.207256	-0.186672	-0.166425	-0.171603	-0.225775	-0.125039	-0.303048	-0.256531	-0.18299	-0.23381	-0.172661
cg13934830	0.168827	0.122904	0.336919	-0.153041	0.0431782	-0.0410765	0.14428	0.0526114	0.301141	0.299961	0.236494	0.239326	0.171234	0.263059	0.177351	0.335407	0.281083	0.183202	0.054848	0.214615	0.096779	0.15648	-0.0902824	0.256155	0.312987	0.246451	0.0946607	0.21518	0.188826	0.271617	0.211522	0.11828	0.185872	0.257542	0.239661	0.175059	0.333763	-0.501698	0.234677	0.251426	0.406823	0.18018	0.206224	0.193997	0.0680861	0.251394	0.168626	0.0731045	0.0333345
cg14616584	0.361789	0.346266	0.325761	-0.0722011	0.274611	0.269819	0.262111	0.163354	0.418458	0.29483	0.487373	0.396542	0.524718	0.474375	0.299711	0.19224	0.501124	0.523386	0.0384885	0.28266	0.0661097	0.547	-0.120781	0.435897	0.258223	0.25955	0.313404	0.500407	0.357843	0.464871	0.553704	0.296644	0.425686	0.524277	0.492354	0.0959896	-0.0208318	-0.00921601	0.479288	0.226545	0.326877	0.169983	0.399538	0.274142	0.319235	0.32452	0.537377	0.198631	0.318479
cg14960282	0.0772533	0.159628	0.402572	-0.0886936	0.317473	0.0366097	-0.00312065	0.144392	0.453112	0.311199	0.193546	0.230733	0.261541	0.375701	0.0925216	0.149598	0.310617	0.146935	-0.199953	0.352934	0.157707	0.174355	-0.215593	0.285179	0.208158	0.301471	0.209884	0.350246	0.277134	0.291611	0.264837	0.096598	0.234455	0.2993	0.191744	0.140895	0.11735	-0.243803	0.131072	0.262884	0.360053	0.154895	0.330668	0.210919	0.312648	0.102036	0.219456	0.14356	0.00528404
cg14992273	-0.0342988	0.12198	0.292958	-0.163033	0.228522	-0.0132025	0.32539	0.033996	0.363723	0.267542	0.233237	0.130495	0.223419	0.253162	-0.103584	0.134556	0.306928	0.0662768	-0.151205	0.232961	0.027164	0.235224	-0.141556	0.163787	0.136972	0.29902	0.237008	0.3266	0.35892	0.195507	0.217191	0.193156	0.267354	0.304455	0.168011	0.027608	0.0872397	-0.370992	0.194813	0.234421	0.13162	0.147011	0.171674	0.219983	0.142476	0.210496	0.234876	0.239243	0.211916
cg16379885	-0.0667442	-0.0526917	0.0666433	-0.0112264	0.207194	0.165065	0.219613	0.113225	0.181427	0.108206	0.194186	0.115428	0.109525	0.045864	-0.0656482	0.0456514	0.192831	0.0359165	0.00836786	0.0437145	-0.243139	0.0954121	0.0530367	0.00331312	0.136621	0.195938	0.19393	0.0902138	0.157251	0.0260013	0.106321	-0.0571698	0.233406	0.20371	0.0126438	-0.0135336	0.0948091	-0.0374572	0.218267	0.1045	0.066869	0.0907318	0.0616564	0.198676	-0.00273856	0.158108	0.142547	0.298422	0.268036
cg16599703	-0.14294	-0.0665495	-0.156661	0.134385	-0.0416173	-0.108645	0.158555	-0.230352	-0.0710835	-0.093235	-0.125881	-0.0575794	0.0246364	-0.0842913	-0.0699652	-0.118044	-0.0357118	-0.0726697	-0.249261	-0.137871	0.0199489	0.0560543	0.00633699	-0.0664997	-0.0559171	-0.120493	-0.0233712	0.031479	-0.113041	0.030857	0.0210727	0.0718508	-0.0687747	0.00257522	-0.109307	-0.121503	-0.105447	-0.0801255	-0.0231588	-0.0744826	-0.185535	-0.106545	-0.0290813	-0.0828903	-0.148124	-0.118918	0.0569394	-0.0400243	-0.0444213
cg16911275	0.14572	0.25881	0.39205	-0.148795	0.327312	0.010587	0.386855	0.0858454	0.460639	0.454105	0.429115	0.293846	0.464854	0.362743	0.215579	0.280414	0.435137	0.314368	-0.111651	0.299607	0.106463	0.409791	-0.211059	0.294197	0.182591	0.281659	0.259366	0.472035	0.34983	0.357971	0.453639	0.239826	0.309093	0.42227	0.314287	0.115273	0.0818988	-0.359023	0.31188	0.30691	0.313311	0.194812	0.368104	0.279955	0.177052	0.302193	0.350533	0.231384	0.277062
cg17952046	0.246753	0.554213	0.547695	-0.325829	0.375514	-0.104595	0.369966	0.39658	0.569749	0.523312	0.649136	0.677639	0.651304	0.657251	0.404612	0.424495	0.676397	0.562438	0.00956358	0.492341	0.216814	0.688948	-0.308536	0.529969	0.515253	0.396438	0.434557	0.529753	0.527118	0.64444	0.593391	0.483793	0.488568	0.678706	0.594511	0.346753	0.199891	-0.375982	0.642199	0.456981	0.607024	0.414851	0.457625	0.454084	0.489019	0.414307	0.55766	0.27527	0.297335
cg19206040	0.0186203	-0.125795	-0.0649076	0.0095367	-0.120475	-0.042572	-0.0323202	-0.0393719	-0.138918	-0.170121	-0.0692725	-0.130443	-0.12884	-0.0980007	-0.140706	-0.00188801	-0.0976412	-0.00902007	-0.00858971	-0.113022	-0.0853169	-0.109362	0.15012	-0.067642	-0.0150776	-0.0847244	-0.049464	-0.116368	-0.0900075	-0.121599	-0.079996	-0.148244	-0.0814297	-0.0743116	-0.125758	0.0513969	0.0743922	-0.0171036	-0.0279904	-0.0467599	-0.0343736	-0.126251	-0.118054	-0.0128252	-0.106137	0.0648425	-0.0508806	-0.0505586	0.0547433
cg19640303	0.0682919	0.086918	0.192207	-0.00344942	-0.0173121	0.0381243	0.0805393	-0.0393109	0.171625	0.101555	0.0942009	0.149812	0.106947	0.171495	0.105099	0.213092	0.156589	0.0608715	-0.0145935	0.133357	0.0830428	0.105006	0.077716	0.126666	0.222139	0.135382	0.0961513	0.121634	0.11094	0.132646	0.0937385	0.0912865	0.0980806	0.143716	0.146251	0.0969285	0.295013	-0.39217	0.145928	0.188842	0.269654	0.0773502	0.106757	0.0776103	-0.0199442	0.182638	0.0837454	0.0837932	0.0397276
cg19727439	-0.0470201	0.0415856	0.0277814	0.017523	-0.0758128	0.107321	-0.030618	0.0985592	-0.113677	-0.185621	-0.0602299	-0.0100234	-0.0609343	0.0454224	-0.0772189	-0.0468705	-0.0381293	-0.0117069	-0.127425	0.0485417	-0.00250704	-0.0266849	0.0927401	-0.00950636	0.00738211	-0.00705449	-0.0722325	-0.0804089	-0.0333414	-0.0335726	-0.134082	-0.0906333	-0.0386206	-0.0118237	-0.0513958	0.150198	0.0241349	0.0838833	-0.0480742	-0.0262345	-0.0468353	-0.0557938	-0.0738793	-0.121424	-0.0642972	-0.0456934	-0.0251363	-0.0795956	-0.0195263
cg20168230	0.159593	-0.0461514	-0.00788233	0.104005	-0.242229	0.0169478	-0.121767	-0.0663239	-0.171444	-0.218078	-0.0525369	-0.0541995	-0.0784025	-0.0976021	-0.0418615	0.0253074	-0.128026	-0.0730718	-0.1628	-0.0526413	-0.16888	-0.0602796	0.0174454	-0.110295	-0.0256423	-0.086481	-0.0761871	-0.0949527	-0.0358599	-0.00121809	-0.11604	-0.162502	-0.0777088	-0.0307491	-0.00518348	-0.00474033	-0.00263992	-0.153712	-0.0283026	-0.0779193	-0.0170603	-0.113073	-0.225619	-0.0816281	-0.130649	-0.0756013	-0.103676	-0.186036	-0.150347
cg20779373	0.198754	0.25755	0.354091	-0.22458	0.312123	-0.0590794	0.302339	0.208893	0.378679	0.326547	0.385286	0.294745	0.536843	0.378065	0.146677	0.328576	0.479633	0.304893	-0.0382758	0.306933	0.0169463	0.462166	-0.183873	0.279228	0.187953	0.204545	0.226405	0.441455	0.336515	0.394036	0.535298	0.271886	0.413108	0.536052	0.37726	0.0975256	-0.0554233	-0.361682	0.371749	0.211079	0.218162	0.104025	0.339094	0.172837	0.246682	0.286048	0.404056	0.262709	0.238312
cg21409965	-0.0389257	0.124308	0.237737	-0.0369293	0.184615	0.00766371	0.184122	-0.046824	0.263648	0.213534	0.159481	0.167686	0.219124	0.265995	0.0717035	0.282455	0.174762	0.116498	-0.195704	0.203083	0.0846815	0.170282	-0.0655279	0.17944	0.110482	0.0301344	0.0916812	0.28077	0.171953	0.253345	0.226497	0.0404749	0.0640292	0.148542	0.124696	0.0932115	0.192268	-0.0827438	0.140086	0.28601	0.212871	0.11882	0.182989	0.135704	-0.00689892	0.116107	0.216695	0.0706315	0.203443
cg23715749	0.373012	0.195325	0.34222	-0.189014	0.342141	0.00246146	0.387851	0.261426	0.490017	0.367758	0.545975	0.37241	0.598746	0.405153	0.308952	0.426855	0.5519	0.485026	0.0795343	0.302409	0.121461	0.597022	-0.132619	0.418211	0.357444	0.231737	0.205449	0.682781	0.474573	0.456213	0.785886	0.362894	0.476987	0.552938	0.410406	0.13948	0.0614428	-0.248606	0.486787	0.301977	0.359088	0.1122	0.445574	0.382483	0.39512	0.361558	0.564844	0.135806	0.302683
cg26162385	0.206839	0.247055	0.29198	-0.147244	0.196935	0.0824751	0.151912	0.114647	0.258085	0.308501	0.301609	0.248879	0.340655	0.402347	-0.00586459	0.143307	0.323093	0.136973	-0.11999	0.219834	0.048096	0.253945	-0.207254	0.187046	0.198901	0.136351	0.15433	0.266684	0.418504	0.408512	0.275168	0.0451978	0.307521	0.341981	0.335216	0.00932744	0.0334594	-0.346453	0.285341	0.184367	0.253896	0.199854	0.146567	0.0523227	0.250803	0.0948812	0.271515	0.16995	0.104667
cg27433516	0.0446478	0.153751	0.245049	-0.125039	0.231159	0.0267799	0.232257	0.11504	0.268165	0.1375	0.227567	0.193784	0.256664	0.301417	-0.00809024	0.0946699	0.329845	0.0954571	-0.12719	0.250696	0.109057	0.228772	-0.200652	0.198078	0.152221	0.230718	0.176825	0.238126	0.179207	0.17431	0.232268	0.148195	0.297605	0.30138	0.218098	0.128763	0.0156402	-0.343256	0.245911	0.155968	0.123019	0.067284	0.244801	0.209648	0.109808	0.271232	0.200242	0.155998	0.157119
ch.1.1187063R	0.424058	0.463496	0.28486	-0.204774	0.0537458	-0.0317426	0.354251	0.165388	0.200954	0.340588	0.459696	0.46578	0.472102	0.399975	0.57394	0.317625	0.48813	0.665744	0.221128	0.144265	0.143068	0.628924	-0.165633	0.458953	0.219798	0.101279	0.244715	0.465034	0.478681	0.410512	0.532856	0.296171	0.270711	0.531854	0.561946	0.117943	-0.0180046	-0.121231	0.474596	0.226936	0.32719	0.18766	0.155553	0.197769	0.25112	0.0801516	0.47193	0.11901	0.080651
cg20443613	0.0830155	-0.217637	-0.139293	0.112805	-0.0537741	-0.0264099	0.0174819	-0.201328	-0.0520786	0.0141119	-0.048062	-0.150443	0.160577	-0.0967362	-0.0131749	0.173437	-0.0833052	-0.00855422	-0.0784349	-0.142509	-0.225611	0.0234492	0.0312507	-0.204131	-0.118396	-0.113361	-0.282314	0.0686607	-0.0575472	0.046161	0.213264	-0.0271439	0.115502	-0.112553	-0.074421	-0.187695	-0.0795032	-0.0983398	-0.142354	-0.171181	-0.0432928	-0.245935	-0.0321671	0.0327201	-0.0786792	0.0599484	0.107995	-0.327802	0.009996
cg00906130	-0.0765375	0.209759	0.306245	-0.0613205	0.094248	0.0733192	0.0165301	0.340529	0.156436	0.203143	0.154861	0.198733	0.0645332	0.145192	0.217237	0.076512	0.143006	0.0606869	-0.041902	0.246893	0.0343242	0.0167043	-0.106709	0.0833952	0.127486	0.139222	-0.0439648	0.0629418	0.10477	0.145509	-0.0766963	-0.0459886	-0.00443438	0.126583	0.106739	0.375072	0.215645	-0.0991381	0.0181989	0.141021	0.154358	0.109781	0.0429184	0.127563	0.151197	-0.00889264	-0.0434519	0.0310401	-0.0332175
cg01084566	-0.201515	0.108211	-0.137313	0.107451	-0.149338	-0.097008	-0.200591	-0.0427777	-0.342544	-0.0346341	-0.183455	-0.0199968	-0.284192	-0.181051	0.0632929	-0.081138	-0.205737	-0.0408347	0.0943533	-0.194942	-0.00787239	-0.227197	0.125084	-0.104796	-0.114398	-0.154623	-0.0600671	-0.22799	-0.194093	-0.066426	-0.282853	-0.346169	-0.442619	-0.197146	-0.095335	-0.0111386	0.0201235	0.243453	-0.0952352	-0.161289	-0.179779	0.101146	-0.190025	-0.315049	-0.252889	-0.45362	-0.242757	0.055125	-0.177127
cg02822257	-0.20171	0.260472	0.0595694	-0.0408938	-0.0124404	-0.00177012	-0.130651	0.151536	-0.115363	-0.103732	-0.172484	0.0928194	-0.0691001	0.137876	0.143211	0.0298474	-0.0848192	0.0430344	-0.108434	0.0452009	0.115048	-0.0934644	0.10014	-0.00577059	0.0983364	0.0227079	-0.0428602	-0.0778331	0.0132073	0.0217467	-0.227685	-0.22404	-0.277524	-0.0799796	0.0530935	0.133321	0.0851126	0.0103351	-0.0456595	0.0999595	0.0627427	0.120952	-0.125466	-0.234397	-0.0763433	-0.295332	-0.109961	-0.0208478	-0.0523238
cg03772063	-0.249541	-0.249641	-0.479277	0.248238	-0.289842	0.0102644	-0.274049	-0.393212	-0.548293	-0.312149	-0.540282	-0.378427	-0.378337	-0.451104	-0.267118	-0.301847	-0.574889	-0.299888	-0.169311	-0.497002	-0.248933	-0.406382	0.331221	-0.416231	-0.344256	-0.397256	-0.287861	-0.398434	-0.281966	-0.263915	-0.384853	-0.476944	-0.739362	-0.595103	-0.400981	-0.261838	-0.127082	0.34869	-0.389783	-0.354453	-0.359392	-0.213141	-0.381136	-0.529745	-0.518631	-0.387766	-0.342638	-0.193724	-0.11502
cg04555941	-0.163608	0.184458	-0.0370446	0.0185609	-0.0857453	-0.136835	-0.199436	0.0765652	-0.269794	0.0292617	-0.0931743	0.0859125	-0.225619	-0.0959579	0.125665	-0.0405987	-0.119044	-0.0310323	0.109697	-0.102239	0.0106008	-0.181805	0.0536499	-0.0421561	-0.0689128	-0.123851	-0.0166722	-0.239091	-0.125533	-0.0102834	-0.270141	-0.297129	-0.368217	-0.112387	-0.0175477	0.114773	0.0598079	0.2046	-0.0229781	-0.0947321	-0.0765907	0.16869	-0.150624	-0.234991	-0.134224	-0.351267	-0.231924	0.102153	-0.147192
cg05527430	-0.0984041	0.134759	-0.111912	0.00606975	-0.0909452	-0.0589525	-0.16079	0.0879184	-0.272326	-0.0112832	-0.0588769	0.0530278	-0.19558	-0.137935	0.215366	-0.0483318	-0.133631	0.0538134	0.231939	-0.155784	-0.0374175	-0.162593	0.0999286	-0.0701408	-0.0395318	-0.107604	0.00816804	-0.188906	-0.172913	-0.0410535	-0.208189	-0.266266	-0.293265	-0.116406	-0.0317395	-0.00717716	0.0241811	0.275089	-0.00731209	-0.0894638	-0.1028	0.107432	-0.125647	-0.213352	-0.0962449	-0.300859	-0.180039	0.0689865	-0.0765114
cg06366981	-0.272755	0.0438343	-0.120471	0.158007	-0.101793	-0.10438	-0.341002	-0.0416382	-0.34071	-0.262951	-0.354297	-0.12879	-0.285634	-0.101095	-0.0896215	-0.163882	-0.323185	-0.163582	-0.141529	-0.159873	-0.0302895	-0.302885	0.191355	-0.205436	-0.134143	-0.0699439	-0.101654	-0.244212	-0.158488	-0.125063	-0.347988	-0.393725	-0.481421	-0.32512	-0.170361	-0.0272132	-0.057121	0.120097	-0.250214	-0.104063	-0.193856	0.0306205	-0.167227	-0.382559	-0.199656	-0.442016	-0.30113	-0.0872747	-0.186797
cg07372795	-0.0559916	0.416345	0.31365	-0.119149	0.120624	0.0285834	0.100283	0.325318	0.138854	0.221534	0.135856	0.29371	0.228302	0.298803	0.284748	0.14187	0.215946	0.212722	-0.085911	0.358717	0.114861	0.215991	-0.102946	0.185811	0.182997	0.123466	-0.0826233	0.102027	0.262874	0.176579	-0.0473121	-0.0308481	0.0135014	0.234465	0.352909	0.408567	0.172176	-0.160118	0.148431	0.199815	0.209474	0.237494	0.0653157	0.0563172	0.0500985	-0.0760864	0.0704713	-0.0458273	0.0430211
cg11073923	0.228176	0.0660322	0.00124353	0.173592	0.0247515	-0.134276	0.221136	0.124726	0.0527081	0.138736	0.0418168	0.0838743	0.0373292	0.0224484	0.179116	-0.184522	0.0885619	0.225311	0.0699041	0.0970374	0.0290192	0.171459	0.0435351	0.087751	0.0521183	0.0223116	0.00698778	0.156095	0.06387	0.0789348	0.124375	0.144833	0.0388173	0.12981	0.0390258	0.12027	-0.02394	-0.0272054	0.0312713	0.0101437	-0.00511448	0.173388	0.00954552	0.140679	0.0424741	0.0560689	0.10517	-0.0027494	0.0345296
cg13181537	-0.121131	0.353287	0.087031	-0.0432928	0.0948965	-0.0835139	-0.0185002	0.191187	-0.0847547	0.146043	0.0661173	0.205858	-0.0899412	0.0908251	0.25123	-0.0435905	0.071054	0.149122	0.118469	0.0354773	0.112155	-0.0187771	0.000814581	0.0974154	0.0563879	0.00679003	0.170791	-0.0573535	-0.0135387	0.112803	-0.135676	-0.148567	-0.236134	0.0774196	0.132001	0.148701	0.0888812	0.174891	0.123492	0.0639456	0.0146062	0.298553	-0.0352416	-0.101332	0.0357185	-0.24219	-0.0879685	0.230665	-0.0256463
cg15474754	-0.0805833	0.324602	0.0523285	-0.128009	0.0773168	-0.0399604	0.00452485	0.253867	-0.105434	0.0607331	0.0681675	0.213307	-0.0326646	0.150575	0.227499	-0.0373219	0.069908	0.267448	0.196114	0.00985185	0.129285	0.00307405	0.0959227	0.103742	0.094606	0.00290065	0.253744	-0.032447	0.0616251	0.0595127	-0.0905542	-0.170316	-0.148642	0.117069	0.193046	0.103744	0.142531	0.0483631	0.187943	0.0992632	0.0485833	0.233358	-0.0762985	-0.00947349	-0.00115948	-0.197054	-0.0394369	0.234128	0.0758435
cg18164599	0.36011	0.266032	0.142014	-0.0600527	-0.015526	-0.0748102	-0.00688185	0.161314	0.0151881	0.143188	0.13385	0.264668	0.197771	0.164476	0.271656	0.0886438	0.0999761	0.191379	0.0384221	0.0713859	0.142054	0.230436	-0.152678	0.16106	0.0450104	0.0379611	-0.0293577	0.102977	0.100312	0.11331	0.186082	0.0647084	0.103626	0.191207	0.262793	0.14163	-0.0559738	-0.162139	0.0910224	0.0710671	0.118263	0.103168	0.0584903	0.169717	0.0579359	0.0262231	0.0559947	-0.0822995	-0.0523776
cg20455617	-0.186721	-0.0559483	-0.279733	0.15526	-0.272688	-0.0460309	-0.138775	-0.246311	-0.441566	-0.217454	-0.411377	-0.190245	-0.306939	-0.265734	-0.0273695	-0.119293	-0.369929	-0.11946	-0.151793	-0.358538	-0.0409388	-0.267142	0.223152	-0.177519	-0.225085	-0.326293	-0.238481	-0.241701	-0.241458	-0.213114	-0.266365	-0.316582	-0.684274	-0.419357	-0.225261	-0.0802766	-0.0416732	0.21606	-0.243004	-0.1374	-0.244223	-0.054966	-0.309297	-0.392996	-0.414553	-0.414997	-0.244708	-0.219221	-0.180177
cg00848374	0.123376	0.201099	0.0889878	-0.139774	-0.0538459	0.0275565	-0.0745388	0.074676	-0.0681056	0.0831314	0.0835822	0.192366	0.0789418	0.204759	0.10736	0.0843217	0.128012	0.109059	0.0789123	-0.00346463	-0.037698	0.0314125	0.0370132	0.0708481	0.0855252	0.0327111	0.0887686	-0.0631335	0.236573	0.143194	-0.0419521	-0.184302	0.128705	0.126633	0.182939	-0.0296555	0.156942	-0.191593	0.190619	0.0588512	0.154481	0.0565309	-0.13864	-0.0992873	0.114783	0.0309312	0.141018	0.169215	0.0648934
cg02166981	0.144594	0.210067	0.125803	-0.181682	-0.0615974	0.016385	-0.0439879	0.0715308	-0.0370302	0.102089	0.103755	0.207221	0.0952506	0.224026	0.110137	0.119255	0.146971	0.135937	0.0993601	0.0109795	-0.0395618	0.0687328	0.0322446	0.102635	0.107744	0.0550086	0.0920449	-0.0494569	0.281631	0.168979	-0.02283	-0.143256	0.133849	0.154964	0.212654	0.0016986	0.195482	-0.268812	0.210118	0.0816358	0.193854	0.0770652	-0.150473	-0.0666845	0.0838143	0.0637338	0.165394	0.149617	0.0937377
cg03651769	-0.025285	0.0870351	0.234858	-0.140859	0.173221	0.0358048	0.193517	0.0917845	0.266005	0.181165	0.188894	0.118538	0.0587418	0.123763	-0.00772642	0.0593347	0.191446	-0.0397279	-0.0788903	0.255759	0.238831	0.0581799	-0.219542	0.121784	0.168188	0.0931773	0.0455089	0.222452	0.0285052	0.16728	0.0881649	0.114268	0.126342	0.206287	0.178364	0.13178	0.0117127	-0.185749	0.123242	0.0893072	0.0967951	0.187447	0.145972	0.0773054	0.191467	0.109802	0.0383858	0.0938731	-0.10572
cg04238348	-0.018284	-0.116424	-0.284448	0.100273	-0.356707	0.0132511	0.0209051	-0.331622	-0.390775	-0.124876	-0.168764	-0.218047	-0.0796886	-0.176214	0.01185	-0.0444943	-0.20826	-0.0486535	0.0797414	-0.305368	-0.236145	0.000614256	0.175311	-0.2326	-0.165075	-0.263588	-0.203921	-0.256528	-0.0173571	-0.153731	-0.0951034	-0.0995238	-0.141314	-0.126509	-0.0153274	-0.163435	-0.00850359	-0.0836243	-0.0929807	-0.117192	-0.200218	-0.192339	-0.29203	-0.16544	-0.419436	-0.204887	-0.10201	-0.208117	0.0411592
cg04923840	0.0300075	-0.140009	-0.343549	0.171188	-0.613086	0.14407	-0.169681	-0.442308	-0.51138	-0.346167	-0.304184	-0.343168	-0.327825	-0.242524	-0.101327	0.0153318	-0.478641	-0.142782	0.0958898	-0.530267	-0.0931363	-0.226815	0.271503	-0.359048	-0.316295	-0.646204	-0.347753	-0.376185	-0.0494339	-0.20583	-0.276993	-0.308703	-0.409791	-0.421602	-0.116158	-0.278186	-0.169284	0.202265	-0.289119	-0.207089	-0.277736	-0.306552	-0.710439	-0.373194	-0.436563	-0.328059	-0.2528	-0.344986	-0.145916
cg04976337	0.147533	-0.124211	-0.2397	0.192789	-0.238302	-0.0650353	0.0660882	-0.222704	-0.174824	-0.1754	-0.193134	-0.113297	-0.0860152	-0.226416	-0.0569082	-0.068988	-0.223414	-0.0208741	-0.0817322	-0.209648	0.0301251	-0.0661152	0.148719	-0.0411411	-0.0506979	-0.0626931	-0.217165	-0.00801366	-0.193967	-0.173632	0.0178076	0.0164799	-0.156545	-0.156427	-0.0516743	-0.108342	-0.0868077	0.0591519	-0.117645	-0.172961	-0.0813591	-0.146003	-0.0974522	-0.0702259	-0.253153	-0.0811018	-0.0482132	-0.265158	-0.109022
cg05129325	0.090854	0.439507	0.224778	-0.128488	0.0919082	0.0735523	0.104208	0.282542	0.0518254	0.241014	0.276338	0.353921	0.14035	0.350269	0.342105	0.153068	0.340492	0.414399	0.221237	0.182012	0.225967	0.25373	-0.0244083	0.311307	0.199727	0.136199	0.278396	0.0833796	0.221513	0.206854	0.0298745	0.0155744	0.281485	0.352801	0.449434	0.10886	0.0832536	-0.143946	0.407447	0.222237	0.136437	0.148124	-0.0143038	0.102471	0.178773	0.0302091	0.194967	0.233018	0.0578314
cg05699035	0.020317	0.07032	-0.00987654	0.178692	0.0849911	-0.0114512	0.116004	-0.00713203	0.0437721	0.0535155	0.0313116	0.0850746	0.0112729	0.0132662	0.0512331	-0.101018	0.0770862	-0.0768935	-0.137251	0.120485	0.259647	0.0454625	-0.0304392	0.0895989	0.044269	-0.0697687	-0.019588	0.130016	-0.0629051	0.090236	0.0769337	0.121658	0.0675162	0.044381	-0.0295638	0.0536128	-0.00215457	0.158704	0.0272262	-0.0102918	-0.0539289	0.0802589	0.0288063	0.0144037	0.197124	0.0542526	0.115285	0.0430852	-0.095266
cg05961348	0.1094	0.0381356	-0.158545	0.352944	-0.171233	0.47461	0.152724	-0.0564248	-0.0984877	-0.073886	-0.0893742	-0.0104284	0.0652425	-0.121248	0.0962681	-0.034008	-0.0644981	-0.0292248	-0.0483558	-0.0629952	0.0327295	0.0934329	0.127694	-0.093926	-0.112442	-0.105544	-0.133896	0.0916515	-0.061032	-0.0419041	0.0345406	0.0610945	0.0081006	-0.0310292	0.0433292	-0.0818309	-0.0765869	0.334166	-0.0355122	-0.0673418	-0.130693	-0.114661	-0.125492	-0.0418214	-0.12669	-0.167276	0.00446257	-0.170695	-0.0956565
cg08453036	0.00161412	0.468891	0.415739	-0.196388	0.289952	0.0584234	0.0320597	0.467763	0.243382	0.236126	0.30528	0.42183	0.12348	0.446895	0.24533	0.0809623	0.462855	0.393937	0.0932963	0.398712	0.306918	0.197513	-0.130549	0.415841	0.254049	0.336914	0.422874	0.174733	0.218676	0.229088	-0.0186078	0.0212813	0.3608	0.438216	0.439587	0.25644	0.119047	-0.150265	0.41864	0.258742	0.168847	0.234606	0.155893	0.21607	0.338098	0.0731293	0.193002	0.362677	0.0558514
cg09441363	0.0214133	0.0474601	0.107385	-0.0661895	-0.145235	0.0763981	-0.120054	0.16857	-0.140561	-0.0803238	0.0321827	0.0280452	0.0242276	0.0475045	0.0459429	0.0763627	-0.0110268	0.0288635	-0.0163432	0.0405943	-0.168072	-0.0288614	-0.0145874	-0.0425557	0.0203169	-0.0338383	0.00838261	-0.154564	-0.00760192	-0.00435075	-0.141786	-0.195157	0.0656172	0.0664698	0.0850112	0.135621	0.132832	-0.23003	0.0436838	0.00932999	0.0513028	-0.0345703	-0.149211	-0.0521964	-0.0255849	-0.0233942	-0.0871544	-0.116406	-0.0985355
cg10219850	-0.06835	0.12867	0.191294	-0.0402616	0.290115	-0.0296621	0.0631104	0.023973	0.266413	0.279496	0.128554	0.134805	0.110428	0.262912	0.0407456	-0.028577	0.183633	0.0636605	-0.119313	0.237492	0.130945	0.0677464	-0.110996	0.109898	0.068511	0.135431	0.132931	0.142615	0.0946438	0.185697	0.0983565	0.0252085	0.175964	0.196711	0.0921124	0.0554707	0.0377878	-0.129011	0.0456841	0.198516	0.140882	0.19385	0.222128	0.149984	0.174982	0.0806384	0.0511135	0.275873	0.0947267
cg10592245	-0.0738123	0.0809092	0.256926	-0.146642	0.0236375	0.151519	-0.141348	0.121579	0.136206	0.195929	0.210112	0.0904105	0.0873783	0.129421	-0.0324688	0.214013	0.104095	-0.0090121	0.0542311	0.130687	-0.175481	0.0257892	-0.0811732	0.00613731	0.015673	0.188843	-0.0140296	-0.0166831	0.211521	0.142029	-0.0333351	-0.0804663	0.102796	0.0900974	0.127655	0.0833451	0.130579	-0.202773	0.0455967	0.0946865	0.176587	-0.0145855	0.0540799	-0.0337082	0.0517994	0.126064	0.0514655	0.00734891	-0.0124199
cg11194108	-0.035115	0.0447361	-0.016352	0.046123	0.0705046	-0.0767474	0.296659	0.0124379	0.110736	-0.00362004	0.0620447	0.111629	0.0857564	0.0714777	0.0746359	-0.0340498	0.139227	0.13072	-0.0397152	0.0508324	0.317677	0.190663	0.0149774	0.143947	0.166628	0.0188714	0.103048	0.187092	0.0127845	0.0611262	0.163386	0.239488	0.130881	0.135477	0.0503471	0.0777594	0.0112003	-0.059357	0.133368	0.0185208	-0.00503942	0.0129618	0.0235639	0.214108	0.129737	0.133491	0.100284	0.0416925	0.0508779
cg11200222	0.0771228	0.450659	0.215256	-0.11586	0.0588749	0.0870888	0.132131	0.259735	0.0304134	0.216463	0.272447	0.358051	0.159486	0.351395	0.348986	0.14429	0.347228	0.42036	0.203999	0.161749	0.21215	0.288252	-0.010212	0.295408	0.188892	0.101364	0.271552	0.0881229	0.218498	0.224776	0.0494405	0.0239108	0.2678	0.359502	0.463777	0.101871	0.0621925	-0.127075	0.416986	0.205667	0.127226	0.152368	-0.0416662	0.086965	0.171666	0.0318747	0.214127	0.230626	0.0400939
cg11346522	0.0706906	0.254104	0.183633	-0.134779	-0.0641129	0.0805781	-0.0248648	0.100967	-0.0261489	0.0656517	0.121549	0.239585	0.0201453	0.208849	0.102848	0.127226	0.139438	0.104997	0.0239459	0.0646458	0.130442	0.0590593	0.0812653	0.165288	0.195602	0.0649938	0.119629	-0.0613326	0.197187	0.101652	-0.133976	-0.057523	0.050524	0.134708	0.131844	0.189074	0.343245	-0.229745	0.247684	0.153072	0.218583	0.119053	-0.165784	0.0695573	0.03628	0.01687	0.125991	0.102246	0.0794138
cg11398511	0.0131959	-0.0437961	-0.0623011	-0.111513	-0.0238821	0.0922397	0.00916315	-0.0455646	-0.042755	-0.0198906	-0.0254733	-0.102336	-0.056532	0.0254648	-0.157269	-0.0195556	-0.0406941	-0.0274434	0.160765	-0.0958336	-0.113232	-0.00286615	0.00156906	-0.151928	-0.0122325	0.0828884	-0.00223094	-0.131233	0.0847078	-0.0386099	-0.0478737	-5.13136e-05	-0.0257291	-0.026284	0.000562896	-0.0957776	0.050245	-0.138168	-0.0315248	0.0179086	0.00527143	-0.0381024	-0.0542042	-0.00428354	-0.120759	0.0434948	-0.0236399	0.016582	0.138399
cg13107973	0.173235	0.322634	0.103561	-0.179586	-0.164567	0.011547	-0.0602763	0.0597934	-0.156105	0.0896022	0.0291146	0.201508	-0.00428452	0.192188	0.0843005	0.103464	0.0346918	0.166135	0.107218	-0.0447292	0.0518117	0.0852291	0.0952123	0.0782607	0.0964025	-0.00210416	0.0579879	-0.156978	0.324171	0.115213	-0.198539	-0.110027	-0.0163344	0.0935432	0.232744	0.102865	0.260707	-0.195898	0.154607	0.156001	0.165393	0.115345	-0.365138	-0.00955894	-0.00830238	-0.0588715	0.110098	0.0304287	0.0375241
cg13214474	-0.042243	0.0759309	0.0553149	0.0490972	-0.0541589	0.0239484	0.0798686	0.0766261	0.053161	0.0113102	0.082649	0.0899137	-0.0485477	-0.00999994	0.0488934	-0.154714	0.101385	0.00254999	-0.0415429	0.106122	0.234547	0.0378007	-0.174396	0.133638	0.0270953	-0.0514519	0.0825584	0.089165	-0.168966	0.0142455	0.0289891	0.125213	0.0141024	0.131379	0.0437798	0.0916074	-0.147469	0.0702175	0.0445268	-0.0217679	-0.0318471	0.12371	0.139794	0.0464688	0.132122	-0.0419558	-0.0832419	0.0853143	-0.26275
cg13916421	-0.032251	-0.517717	-0.214721	0.0789863	-0.2558	0.0227875	-0.3117	-0.301172	-0.211517	-0.128118	-0.305785	-0.45558	-0.396799	-0.390479	-0.297395	0.0136293	-0.415564	-0.278915	-0.0567545	-0.386216	-0.357426	-0.460929	0.15573	-0.290734	-0.261628	-0.124773	-0.305906	-0.255182	-0.0276216	-0.280558	-0.312923	-0.437367	-0.317301	-0.46964	-0.475	-0.246302	0.0304458	0.0032157	-0.364307	-0.184899	-0.136189	-0.332964	-0.318386	-0.193294	-0.281547	-0.169972	-0.20528	-0.320085	-0.0650463
cg14989033	0.122002	0.270057	0.181107	-0.19878	0.00912166	-0.0168945	-0.0184735	0.118264	0.0191123	0.15768	0.144616	0.257131	0.136698	0.279546	0.11962	0.0899151	0.198328	0.154535	0.0703342	0.0760791	0.00691293	0.113456	-0.0248574	0.14249	0.118219	0.124091	0.158981	-0.0159775	0.303406	0.175597	0.000395402	-0.10273	0.188034	0.216275	0.254561	0.0443897	0.209923	-0.270134	0.224365	0.13224	0.228798	0.11394	-0.0701613	-0.0192023	0.138351	0.0499674	0.169231	0.203188	0.0813359
cg17130063	-0.0177529	0.085824	0.0746562	-0.0857005	-0.0415181	-0.0342399	0.0480955	0.0836415	-0.0494534	0.0727725	0.120692	0.117283	-0.0102949	0.055415	-0.0271738	0.0856872	-0.00773708	0.0394601	0.062974	0.0124683	0.00538461	0.0555982	-0.00837847	-0.0621861	-0.0026866	0.116833	-0.0581215	-0.0347845	0.125145	0.0384505	-0.0827753	-0.033753	-0.0441338	0.0506436	0.0442757	0.150845	0.221802	-0.208703	-0.0152414	0.0521213	0.0986156	0.00504143	-0.0622319	0.0279492	-0.0875929	0.0658948	-0.0256643	0.0274195	-0.0489736
cg17934948	-0.0692899	0.413731	0.424767	-0.224269	0.321596	0.0546114	0.12017	0.477856	0.281105	0.308076	0.35499	0.416547	0.031033	0.404705	0.220191	0.101832	0.478771	0.323299	0.169843	0.405042	0.294468	0.13321	-0.102033	0.443952	0.29461	0.366935	0.381861	0.124917	0.207921	0.19376	-0.0679255	0.0467795	0.3839	0.436935	0.350153	0.282903	0.238048	-0.169494	0.413046	0.295795	0.169365	0.320797	0.166853	0.224297	0.316629	0.146738	0.160852	0.396232	0.0878293
cg18794839	-0.0802818	-0.0742452	-0.106022	0.248105	-0.206477	-0.0191036	-0.0993094	-0.129722	-0.197965	-0.189846	-0.11799	-0.0862704	-0.116359	-0.0969461	-0.141398	-0.0261294	-0.15935	-0.136173	-0.138461	-0.126317	-0.137108	-0.118703	0.118571	-0.187789	-0.0181074	-0.11535	-0.076236	-0.214496	-0.124254	-0.0277619	-0.143516	-0.178419	-0.107776	-0.0862149	-0.116923	-0.0124634	0.0394297	-0.0942531	-0.0742881	-0.0888101	-0.0900643	-0.10401	-0.140374	-0.141432	-0.190324	-0.0957487	-0.143224	-0.10478	-0.0589476
cg24464500	-0.00641921	-0.20118	-0.30426	0.166921	-0.218622	0.184896	-0.157109	-0.204632	-0.253825	-0.154721	-0.299321	-0.304742	-0.223028	-0.233747	-0.163085	-0.26247	-0.306017	-0.146351	0.0279692	-0.176364	-0.229154	-0.263766	0.221178	-0.20116	-0.251121	-0.40761	-0.258191	-0.221818	-0.0611513	-0.123634	-0.264896	-0.230597	-0.100426	-0.274988	-0.185208	-0.278994	-0.137134	0.198246	-0.220885	-0.172685	-0.302994	-0.143324	-0.411984	-0.307882	-0.234595	-0.184654	-0.0884347	-0.112264	-0.0476822
cg26547924	-0.00457924	0.153727	0.0705076	-0.0411537	-0.125403	-0.109737	-0.0564712	0.0996264	-0.101127	0.0395572	0.0893589	0.097206	-0.0104446	0.119152	0.0230565	0.0716077	0.0180298	0.102791	-0.0108021	0.0485646	-0.078704	-0.0210567	0.0593069	0.0428959	0.0838377	0.0222637	0.0701608	-0.179257	0.113713	0.112427	-0.140512	-0.0508693	-0.0331453	0.0811169	-0.00469316	0.162155	0.16971	-0.175562	0.0421772	0.127883	0.0789091	0.0835057	-0.0584989	-0.00680891	-0.147409	0.0430895	-0.00163559	0.0454369	0.179153
cg03307401	0.22529	-0.11678	-0.117226	0.0585174	-0.132361	0.0366024	0.252334	-0.108886	0.0135535	-0.0214651	-0.0257413	-0.0350854	-0.053405	-0.122745	0.202282	-0.0188595	0.0981829	0.32797	0.11781	-0.144062	-0.0698819	0.139295	0.10229	0.16701	-0.091454	-0.102287	-0.00718567	0.331448	0.130834	0.0557192	0.14926	0.178631	-0.117505	0.0389709	-0.146998	-0.0840096	-0.0353804	0.200478	0.0196537	-0.0925481	-0.120278	-0.0663086	-0.099083	0.0639397	0.00649314	0.0095814	0.371555	0.00384962	0.0473176
cg04617549	0.249709	0.459553	0.638077	-0.308274	0.408036	-0.0972879	0.41965	0.397869	0.59549	0.642012	0.696148	0.582362	0.429647	0.613697	0.213254	0.352265	0.690177	0.436122	0.202892	0.502016	0.181665	0.496018	-0.283118	0.572314	0.485148	0.515098	0.427652	0.412494	0.523003	0.545156	0.405186	0.424425	0.486009	0.728269	0.608577	0.375576	0.425968	-0.466331	0.591223	0.509449	0.616394	0.523311	0.375395	0.471617	0.464869	0.45855	0.443695	0.377892	0.291555
cg05294243	0.343192	0.531682	0.428927	-0.301303	0.33898	-0.084299	0.345301	0.344198	0.387194	0.460521	0.544224	0.550075	0.575343	0.611991	0.368685	0.204865	0.630721	0.548359	0.0903177	0.368927	0.0994675	0.550796	-0.20119	0.551361	0.376893	0.263148	0.388804	0.417639	0.476058	0.456431	0.46386	0.283744	0.482989	0.685766	0.695699	0.174652	0.173647	-0.430526	0.625915	0.45095	0.446384	0.310789	0.30464	0.277628	0.409026	0.292669	0.47644	0.266158	0.229473
cg20104456	0.0633009	0.154904	0.144219	-0.150791	0.129653	-0.0428512	0.334851	0.262715	0.228636	0.178462	0.327928	0.237611	0.137136	0.103873	0.279727	0.0510238	0.281574	0.269155	0.132395	0.121326	-0.0285555	0.188683	-0.0932851	0.247556	0.0678508	0.134516	0.185422	0.256059	0.0614708	0.180659	0.16402	0.219842	0.097481	0.295748	0.110808	0.069022	0.107141	0.0234128	0.265998	0.0328931	0.123936	0.0683444	0.057669	0.176407	0.193455	0.286476	0.231091	0.217682	0.25395
cg22689630	0.295604	0.533521	0.362782	-0.249128	0.195109	0.0149224	0.246319	0.420605	0.241957	0.379518	0.543327	0.564417	0.476831	0.537333	0.406655	0.257707	0.554113	0.56908	0.213515	0.294127	0.0712573	0.520125	-0.14786	0.450328	0.328253	0.238991	0.350815	0.304947	0.363697	0.374665	0.365822	0.16762	0.428744	0.63335	0.667586	0.160178	0.200547	-0.25549	0.592516	0.362937	0.404059	0.321578	0.220452	0.248988	0.272816	0.172962	0.40558	0.291663	0.151832
cg22918012	-0.0266211	-0.187497	-0.125828	0.110439	-0.139545	0.0241405	-0.0655194	-0.244929	-0.1955	0.00588533	-0.194849	-0.249324	-0.15177	-0.280089	-0.110262	-0.0608422	-0.211853	-0.176136	0.0154046	-0.203013	-0.118789	-0.144853	0.147338	-0.171289	-0.290919	-0.184584	-0.17393	-0.0282252	-0.0971443	-0.175606	-0.0766675	-0.0878075	-0.19828	-0.231489	-0.203634	-0.142049	-0.0164086	0.068854	-0.214547	-0.0457957	-0.281194	-0.219318	-0.145463	-0.129546	-0.164746	-0.0988485	-0.104892	-0.153894	-0.152593
cg26524263	0.0286667	-0.185092	-0.180904	-0.000541838	-0.180104	-0.0489604	-0.0327618	-0.223074	-0.124854	-0.142374	-0.179202	-0.198514	-0.126693	-0.163144	-0.0296023	-0.120676	-0.160881	-0.0433294	-0.0266988	-0.208707	-0.124758	-0.0688931	-0.0266085	-0.103175	-0.278035	-0.211431	-0.10605	0.0028531	-0.0328708	-0.142298	-0.0476112	-0.0156441	-0.190634	-0.177483	-0.206637	-0.153991	-0.160835	0.0143993	-0.118871	-0.173263	-0.136827	-0.204944	-0.158396	-0.0660992	-0.149978	-0.1516	0.0254723	-0.0959634	-0.0550941
cg00142933	-0.078891	-0.628186	-0.525929	0.192064	-0.110389	0.116578	-0.201696	-0.448431	-0.226316	-0.289074	-0.35822	-0.54991	-0.254304	-0.442179	-0.394264	-0.284352	-0.406949	-0.325543	-0.0285458	-0.466476	-0.419575	-0.449401	0.228579	-0.41202	-0.342348	-0.271705	-0.241102	-0.157654	-0.342655	-0.2694	-0.12819	-0.332004	-0.134586	-0.449602	-0.447545	-0.688865	-0.27098	0.155133	-0.292503	-0.376155	-0.401153	-0.480175	-0.203543	-0.393349	-0.224519	-0.0917747	-0.116473	-0.0940784	0.0638237
cg00703885	-0.157211	-0.163348	-0.129235	0.123069	-0.124701	0.0726726	0.0980874	-0.269125	0.00198485	0.0177728	-0.0860394	-0.158293	-0.127211	-0.0920232	-0.0995278	-0.0132222	-0.119895	-0.0144424	-0.0892496	-0.118327	0.0393847	-0.0868775	0.095646	-0.044805	-0.14417	-0.175007	-0.108827	0.0298834	-0.0173449	-0.0352752	-0.0387489	-0.0163727	-0.120887	-0.182456	-0.135701	-0.152613	-0.0722385	0.0165654	-0.14688	-0.172253	-0.079552	-0.0531668	-0.0894618	0.0056344	-0.126939	0.0150247	-0.00635546	-0.108417	0.00468752
cg01761729	-0.00725907	0.110633	0.0999074	-0.145077	0.416842	0.0323224	0.157072	0.10013	0.298413	0.217202	0.0844381	0.18369	0.296553	0.22793	0.00463116	-0.0330402	0.265928	0.105631	-0.0905322	0.242234	0.0328944	0.2327	-0.0995663	0.13723	0.134143	0.179763	0.174668	0.342856	0.101014	0.362611	0.260849	0.169711	0.322147	0.278698	0.0736622	-0.158416	-0.0435499	-0.0712982	0.194242	0.101207	0.0234888	0.144759	0.2978	-0.0233201	0.220893	0.117677	0.328125	0.298424	0.161403
cg03022211	0.157699	-0.0556731	-0.30257	0.116026	-0.178124	0.092751	-0.0270048	-0.156178	-0.271058	-0.210093	-0.243491	-0.19985	0.0667336	-0.114275	-0.0352249	-0.128292	-0.181978	0.0386566	-0.0107579	-0.232341	-0.190623	0.00446432	0.219705	-0.174391	-0.195475	-0.306581	-0.0990087	-0.0662976	0.0697029	-0.112786	0.0263486	-0.125059	0.0335245	-0.142155	-0.0185879	-0.300363	-0.144291	0.161935	-0.0764766	-0.126326	-0.271566	-0.338785	-0.350761	-0.230023	-0.131886	-0.16403	0.0846376	-0.0841005	0.1372
cg03198029	0.0744613	0.0638395	0.197612	-0.0818127	0.321353	0.0439098	0.130996	0.0193654	0.286363	0.225496	0.165117	0.115688	0.164644	0.273798	-0.217155	-0.00755216	0.222352	0.121546	-0.117893	0.184931	0.153745	0.111644	-0.133545	0.148386	0.123572	0.198067	0.261185	0.305657	0.165948	0.260377	0.219026	0.133792	0.195608	0.206023	0.125102	-0.0413184	0.0182946	-0.0984062	0.159858	0.170663	0.143829	0.0660773	0.226079	0.138963	0.170637	0.150516	0.261483	0.138029	0.165551
cg03205238	0.0775304	0.079179	-0.00496338	0.0254279	-0.0728316	0.15861	0.180967	0.0554422	-0.0396599	0.0626854	0.0398814	0.150544	-0.0236147	0.0454266	0.195847	0.0493864	0.0425208	0.158191	-0.0103483	-0.021261	0.113797	-0.0250881	0.124336	0.121436	0.0907324	-0.00713476	-0.0498804	0.06351	0.0468583	0.0407488	-0.0659707	-0.0870102	-0.0225499	0.0024928	0.083705	0.0966319	0.30067	0.00631927	0.0795852	0.0790855	0.0823541	0.116935	-0.138295	0.103484	-0.0584332	0.08393	0.100812	-0.0498799	0.0406433
cg03555157	0.105531	-0.291862	-0.252464	0.153561	0.0478962	0.075211	-0.0915007	-0.205496	-0.122442	-0.150613	-0.248129	-0.24671	0.029732	-0.132891	-0.108528	-0.155044	-0.163593	-0.144002	-0.260031	-0.159729	-0.302648	-0.103017	0.109151	-0.291376	-0.140337	-0.133146	-0.116962	-0.0175679	-0.105535	-0.0878736	0.0648118	-0.220094	-0.00695831	-0.141713	-0.167633	-0.316166	-0.225659	0.0469482	-0.131016	-0.165465	-0.144144	-0.292941	-0.132469	-0.0951586	-0.110569	0.0235713	0.0567997	-0.157973	0.0150646
cg03689092	0.0295051	-0.225825	-0.26232	0.133909	-0.0526571	0.0165887	-0.0701928	-0.189851	-0.19919	-0.167687	-0.319118	-0.226937	-0.106218	-0.203117	-0.0649155	-0.251933	-0.18578	-0.172796	-0.230014	-0.224822	-0.284677	-0.196437	0.0881041	-0.32495	-0.145292	-0.128575	-0.0682022	-0.190909	-0.199516	-0.212869	-0.123544	-0.299877	-0.178882	-0.208945	-0.160146	-0.189886	-0.185466	0.121327	-0.16151	-0.248169	-0.12713	-0.19876	-0.244807	-0.110153	-0.182761	-0.0412343	-0.0623808	-0.0615736	-0.0341187
cg04947052	0.086826	0.0792924	0.0318444	-0.150416	0.322556	-0.107668	-0.0379148	-0.0975483	0.169898	0.113033	0.0287735	0.06905	0.164347	0.22117	-0.0370318	-0.107883	0.179171	-0.0115414	-0.120357	0.0693037	0.0289034	0.115456	-0.104615	0.121594	-0.0290183	0.194737	0.168002	0.180486	0.145	0.157341	0.141469	0.033481	0.227192	0.192986	0.106394	-0.224246	-0.117956	-0.0208054	0.112704	0.023421	0.0026053	0.0203886	0.175394	-0.0863676	0.17466	0.113124	0.278506	0.174083	0.19484
cg06107159	-0.00898924	-0.334055	-0.308764	0.0449251	-0.0348134	-0.0403136	-0.0421011	-0.43872	-0.0632592	-0.164517	-0.21793	-0.325585	0.0632219	-0.167747	-0.178267	-0.0681391	-0.260444	-0.121825	-0.234071	-0.237561	-0.150258	-0.127577	0.175013	-0.183104	-0.114905	-0.119705	-0.220752	0.00185438	-0.04678	-0.108906	0.0788374	-0.0912616	-0.0293109	-0.278402	-0.214745	-0.40153	-0.180204	0.0258547	-0.14338	-0.123647	-0.0657585	-0.331919	-0.0763488	-0.230563	-0.110065	-0.0789722	0.0787889	-0.32412	0.137614
cg07262244	-0.00702384	-0.230591	-0.469212	0.124521	-0.219213	0.162098	-0.133497	-0.233808	-0.411871	-0.211216	-0.273603	-0.240772	-0.284118	-0.349974	-0.0327834	-0.129631	-0.383288	-0.0356519	0.266892	-0.358008	-0.208621	-0.222987	0.376122	-0.251821	-0.135898	-0.21676	-0.206641	-0.251974	-0.308488	-0.274467	-0.21796	-0.189484	-0.255752	-0.313309	-0.203056	-0.366464	0.0503167	0.250995	-0.0970725	-0.144643	-0.168377	-0.195402	-0.209566	-0.327913	-0.435608	-0.262152	-0.164496	-0.0916842	0.107078
cg08385249	-0.143346	-0.0964834	-0.0472248	-0.0289707	-0.117946	-0.132742	-0.0999197	0.0586482	-0.113022	-0.0968501	-0.0709099	-0.0795826	-0.184778	-0.206615	-0.19112	-0.0312345	-0.136446	-0.228662	0.122122	-0.0219112	-0.17328	-0.0725897	0.0682807	-0.161073	-0.0760634	-0.0772731	0.0374362	-0.2222	-0.124759	-0.180125	-0.193515	0.0397341	-0.194839	-0.0653732	-0.176163	0.029679	0.0805999	0.0310511	-0.0264512	-0.0506679	-0.0745262	0.00676623	-0.108192	-0.0711044	-0.154384	-0.00688535	-0.188213	0.123264	0.0294198
cg09131629	-0.114017	-0.054136	-0.270451	0.0407799	-0.0490619	-0.209778	0.116816	-0.177212	-0.188963	-0.0997847	-0.271484	-0.162543	-0.0826398	-0.105497	-0.0196983	-0.191029	-0.162068	0.00686416	-0.0555193	-0.169475	0.0901405	-0.00932964	0.174814	-0.114546	-0.11679	-0.113869	-0.000377529	-0.131305	0.0300596	-0.164058	-0.115759	0.0424033	-0.129732	-0.136501	-0.116206	-0.113152	-0.00713372	-0.0358552	-0.148868	-0.114248	-0.201063	-0.116057	-0.278421	-0.110903	-0.274299	-0.100189	-0.0186071	-0.0361169	0.141124
cg10661054	0.270438	-0.247549	-0.270485	0.182007	-0.375492	0.0530532	-0.084307	-0.0891264	-0.294625	-0.341806	-0.172072	-0.191763	-0.237943	-0.28398	-0.0322104	-0.0202702	-0.201238	-0.00949799	0.0633708	-0.29835	-0.10527	-0.123659	0.216689	-0.122085	-0.128028	-0.216949	-0.184947	-0.0335222	-0.178715	-0.163804	-0.0997565	-0.100448	-0.186209	-0.203244	-0.262854	-0.111873	-0.0445159	0.185313	-0.111453	-0.220671	-0.1952	-0.290239	-0.241582	-0.0624702	-0.125643	-0.0169499	0.0281308	-0.244608	-0.0416787
cg11067412	0.0697208	-0.0405674	0.160479	-0.0370062	0.0877625	-0.00765922	0.137967	-0.0525129	0.223268	0.346074	0.191525	0.0812987	0.0467123	0.00176566	0.00867188	0.159263	0.147955	0.0742246	0.0991651	0.0498913	-0.130608	0.0590351	-0.0681183	0.040338	0.120942	0.154416	0.069366	0.0370215	0.0706488	0.188958	0.173516	0.00625719	0.05424	0.144266	0.0676593	0.0306347	0.0161012	-0.0880263	0.094951	-0.084037	0.186346	0.160714	0.114777	0.173076	-0.0598896	0.188469	0.0159537	0.210559	0.132151
cg11115063	0.056426	-0.480353	-0.48209	0.203006	-0.14821	0.0495051	-0.302846	-0.33983	-0.377847	-0.288167	-0.535811	-0.508304	-0.327315	-0.470204	-0.323492	-0.362886	-0.518383	-0.341406	-0.0903438	-0.380664	-0.304123	-0.46659	0.290195	-0.455319	-0.386722	-0.324962	-0.473521	-0.276723	-0.238178	-0.360791	-0.360782	-0.54206	-0.265969	-0.493437	-0.424849	-0.390442	-0.173186	0.131485	-0.421352	-0.407997	-0.417796	-0.40021	-0.388593	-0.380556	-0.378317	-0.293184	-0.23896	-0.190239	-0.0476989
cg13099839	0.286429	-0.227044	-0.138138	0.111294	-0.203214	-0.0606595	0.0633939	-0.0543786	-0.0708206	-0.133562	-0.00745828	-0.0898586	-0.15641	-0.198014	0.0926874	0.058531	-0.0372688	0.0963056	0.128569	-0.217543	-0.104273	-0.0153874	0.196013	0.0781641	-0.0379124	-0.0605868	-0.0916423	0.135517	0.0025451	-0.0950799	0.0242079	0.00945062	-0.06076	-0.0619312	-0.256564	-0.0322906	0.157563	0.147112	-0.0113507	-0.00297794	-0.0624448	-0.212856	-0.128073	0.138667	0.00217855	0.0975095	0.194591	-0.174254	0.048494
cg14282137	0.0198005	0.0317712	0.0308819	-0.0166129	0.0349906	-0.0579639	-0.18938	0.161926	-0.0463725	-0.0893768	-0.0709556	0.00741239	-0.0119828	-0.0154792	-0.122486	0.0123542	0.010587	0.112492	0.0983101	0.0598515	-0.145426	-0.0463551	0.141786	0.023669	0.059905	0.0880231	0.127966	-0.140604	-0.0180813	0.0454246	-0.100962	-0.0637076	0.0404933	0.0871632	0.0231437	0.0499632	0.0720024	-0.111218	0.118985	-0.00655011	-0.0283411	-0.0521881	-0.0363906	-0.0461436	-0.0796557	0.00757479	-0.0492298	0.186679	0.0491127
cg14489933	-0.0398822	-0.0571987	-0.282149	0.0902662	-0.104619	0.0399023	0.202265	-0.308655	-0.153602	-0.170499	-0.162684	-0.0539256	0.0981588	-0.0604275	-0.0639677	0.120692	-0.116321	-0.000831537	-0.0896519	-0.188976	-0.00396799	-0.00302252	0.293152	-0.170129	-0.00354745	-0.199695	-0.171567	0.0414579	-0.0283248	0.0637098	0.135616	-0.0502235	0.00972953	-0.125778	0.0228717	-0.291868	-0.0452483	0.131358	0.0396979	-0.172634	-0.155024	-0.161725	-0.268271	-0.148559	-0.226283	-0.0786982	0.156398	-0.0530262	0.128984
cg14664764	0.150867	0.115588	0.0922363	-0.0718452	0.273334	-0.0562103	0.00242608	0.217283	0.159521	0.120846	0.108275	0.210641	0.13183	0.141592	-0.0382838	-0.069101	0.107024	0.160671	0.0250801	0.145655	0.00261044	0.129056	-0.122029	0.13475	0.115836	0.151863	0.0877055	0.107585	0.00878572	0.155856	0.066928	0.0811421	0.167108	0.148354	0.17414	0.0425254	0.036295	-0.215089	0.177259	0.155877	0.0863224	0.0673525	0.1919	0.0245039	0.0984814	0.0878631	0.107094	0.0944191	0.027275
cg15781838	0.100043	-0.0786889	0.0550776	0.124777	0.0695746	0.0910379	0.101329	-0.0321582	0.14217	0.134689	0.121612	0.0315087	0.0848347	-0.000376138	0.0118439	0.128446	0.0599333	-0.0175159	-0.229678	0.00930177	0.0603682	-0.0362411	-0.00478453	0.0486611	0.0698032	-0.00976617	-0.150434	0.165546	0.0680607	0.0879004	0.0899463	-0.131364	0.105127	0.04187	0.0034868	-0.0493851	0.0930441	0.0386834	0.0755261	0.031294	0.0219444	-0.0229863	-0.0889334	0.087509	0.0801422	-0.0215039	0.176549	-0.0482667	0.0282597
cg16362481	-0.0143023	-0.367715	-0.553898	0.168514	-0.33	0.151487	-0.0491614	-0.504704	-0.402462	-0.337358	-0.396847	-0.504653	-0.046294	-0.338723	-0.127886	-0.167353	-0.433853	-0.208624	-0.102046	-0.497349	-0.318272	-0.20544	0.211666	-0.437162	-0.379764	-0.449391	-0.333253	-0.138645	-0.162184	-0.314369	-0.0362206	-0.324094	-0.169262	-0.396791	-0.189439	-0.616759	-0.345287	0.192879	-0.285404	-0.372931	-0.357651	-0.463806	-0.484765	-0.430877	-0.374027	-0.223513	-0.0878426	-0.302206	0.0571705
cg16477975	0.0207074	-0.0303367	-0.0670685	-0.0491649	-0.143692	0.0440118	0.162558	-0.0841781	0.0366762	-0.14552	0.0172733	-0.0225667	0.0852929	-0.0168508	0.0724818	0.164215	0.0101281	-0.0212443	0.0234383	-0.224956	-0.0300699	0.0712975	0.0117896	1.20876e-05	-0.0728496	-0.07963	-0.112959	0.0916766	0.0967282	-0.115659	0.135498	0.0349679	0.128594	-0.0149477	0.0479563	-0.138144	-0.0558142	0.0833636	0.030019	-0.0598683	-0.134402	-0.124268	-0.181828	0.0749853	0.00570545	-0.00866001	0.143445	-0.0637082	0.0674653
cg16782174	0.0916158	-0.0489503	-0.181325	0.0844905	-0.0729269	0.0845475	-0.0840868	-0.124695	-0.197343	-0.0530249	-0.0832179	-0.0854296	0.0335086	-0.0234117	0.00915898	0.0371877	-0.116055	-0.0364787	-0.073985	-0.178216	-0.0383074	-0.138957	0.194275	-0.100986	-0.100618	-0.257661	-0.232679	-0.0224987	0.105899	0.0178398	-0.0203524	-0.337125	0.0119574	-0.128359	0.0250771	-0.243333	-0.0781796	0.0884551	0.000516767	-0.150895	-0.143831	-0.186441	-0.292984	-0.265764	-0.0150957	-0.17068	0.0645454	-0.0705008	0.0954917
cg16944093	0.287528	-0.249992	-0.196455	0.0733501	-0.295943	0.000960565	-0.0300975	-0.0818415	-0.167905	-0.208179	-0.0467474	-0.161849	-0.176375	-0.218073	0.0116481	0.102663	-0.155358	-0.0146334	0.119218	-0.261581	-0.119533	-0.0832858	0.209446	-0.0354702	-0.0300098	-0.146448	-0.181222	0.0156454	-0.0527651	-0.143063	-0.0538062	-0.0672126	-0.081297	-0.159268	-0.263177	-0.085917	0.148088	0.10394	-0.044539	-0.0230426	-0.0562396	-0.217613	-0.189259	0.0689467	-0.0800971	0.0585581	0.0851232	-0.293418	0.0475903
cg17976576	0.34228	0.0649708	0.00519548	0.0198426	0.00647518	0.0777372	0.342244	0.0648841	0.12836	0.110236	0.151136	0.168639	0.0942447	0.0520428	0.280434	0.0380385	0.245177	0.49711	0.190082	0.0191258	0.0228268	0.305072	0.114178	0.290801	0.0998923	0.0662647	0.0932589	0.417561	0.220176	0.209093	0.226365	0.300829	0.0798334	0.203394	0.0430846	0.03925	0.054613	0.141243	0.207316	0.0367015	0.0330996	0.0551941	-0.0029307	0.209125	0.0921826	0.110664	0.49269	0.0903161	0.175934
cg18044111	-0.0160844	-0.675329	-0.420204	0.236305	-0.111144	0.0892157	-0.205096	-0.390734	-0.191413	-0.295727	-0.318049	-0.511835	-0.251102	-0.483147	-0.312597	-0.221933	-0.411091	-0.315001	-0.223218	-0.403365	-0.305715	-0.422407	0.206213	-0.350215	-0.262452	-0.220321	-0.337701	-0.0806397	-0.321717	-0.297401	-0.145907	-0.405432	-0.138749	-0.454702	-0.54838	-0.452938	-0.103434	0.122514	-0.295177	-0.312606	-0.313577	-0.506258	-0.130062	-0.148948	-0.228811	-0.0910464	-0.119649	-0.240077	0.0729436
cg18335290	0.0917461	-0.277743	-0.153521	0.100733	0.0688725	0.069239	0.0238901	-0.196466	-0.00988867	-0.0926594	-0.162139	-0.192859	0.0515515	-0.0977647	-0.0655756	-0.0781167	-0.085466	-0.101818	-0.26439	-0.121458	-0.236438	-0.05448	0.0559812	-0.214781	-0.0797892	-0.0864704	-0.0736233	0.0583275	-0.0917682	-0.0350507	0.133374	-0.125973	0.018943	-0.0737822	-0.150905	-0.235322	-0.153873	0.0111803	-0.0766799	-0.082844	-0.0737763	-0.26056	-0.0952865	0.0298543	-0.0665938	0.10885	0.0951448	-0.112493	0.030246
cg19326543	0.104679	-0.124374	0.0643887	0.0567239	0.125348	0.0378891	0.232593	-0.20922	0.22092	0.216211	0.149221	-0.054166	0.145862	0.0310697	-0.0446156	0.0782446	0.0920053	-0.0914599	-0.117627	0.00311126	0.00467442	0.00809429	-0.0434772	0.00193796	0.0319515	0.125226	-0.101195	0.250342	0.0778723	0.253958	0.273872	0.0777373	0.162007	0.0693877	-0.00233193	-0.166872	-0.0375255	-0.120747	0.0629479	-0.0700397	0.051326	-0.0169939	0.132531	0.0102249	0.1412	0.128486	0.160138	0.0353924	0.180864
cg19426955	0.247471	-0.32127	-0.303664	0.192077	-0.354217	0.00216469	-0.0199454	-0.120906	-0.270397	-0.281864	-0.147504	-0.2232	-0.270314	-0.34148	-0.0110102	-0.00341234	-0.21939	0.016769	0.117659	-0.335424	-0.15288	-0.13556	0.284912	-0.108454	-0.0853549	-0.226878	-0.193387	-0.0565152	-0.168253	-0.202126	-0.115717	-0.0935097	-0.193764	-0.228943	-0.321879	-0.121172	0.0851294	0.188026	-0.0820774	-0.168123	-0.164511	-0.281437	-0.278285	0.016919	-0.168478	0.0112546	0.0337768	-0.260383	0.0399484
cg19724910	-0.095665	-0.0196764	-0.142036	-0.0553495	0.0720565	-0.0760339	-0.0626728	-0.150591	-0.0905952	-0.00867502	-0.0662137	-0.0734283	0.144439	0.0702901	-0.11091	-0.0759874	-0.0957235	-0.171448	-0.116971	-0.0930419	-0.0808277	-0.110525	0.0646655	-0.178449	-0.0544599	-0.0363234	-0.0532564	-0.2021	-0.0471442	0.00218798	-0.0175925	-0.200418	0.197325	-0.0529495	0.079486	-0.261291	-0.0554113	-0.177424	0.0132615	-0.0382634	-0.039003	-0.104387	-0.131996	-0.167203	-0.01409	0.0977831	-0.0432969	0.035747	0.187527
cg20476058	-0.0136881	-0.221661	-0.22391	0.170845	-0.0256362	0.0600239	0.0109172	-0.296755	-0.125087	-0.139515	-0.252249	-0.205506	0.032529	-0.176098	-0.021091	-0.111253	-0.115213	-0.0936002	-0.32675	-0.260192	-0.291432	-0.0965917	0.145737	-0.237903	-0.157252	-0.0843638	-0.0108242	-0.0879687	-0.141431	-0.170463	-0.0106336	-0.263238	-0.136172	-0.16242	-0.137933	-0.23162	-0.121796	0.0554889	-0.086873	-0.194668	-0.10205	-0.306947	-0.172	-0.0571821	-0.225589	0.0457921	0.0213668	-0.0838871	0.0423885
cg20694820	0.131127	0.111029	0.0598033	-0.0129259	0.0389364	0.00662224	0.0789967	0.0230462	0.0206384	0.0309959	-0.0539095	0.124458	0.112416	0.11815	-0.0250617	0.0311531	0.0382792	0.0817766	-0.0478662	0.115087	0.12572	0.125944	0.0766169	0.0511282	0.0650771	0.0589275	-0.0142348	0.0586008	0.185245	0.0968784	0.115478	-0.00304561	-0.00989325	0.0899937	0.137424	0.0969932	0.084897	-0.0380637	0.0268428	0.0259737	0.121366	0.105153	0.0040641	0.0224008	-0.00079566	-0.0770787	0.0634403	0.0683294	-0.0487881
cg21339084	-0.0129703	-0.622237	-0.345388	0.186156	-0.0222675	0.0986362	-0.136339	-0.256622	-0.102866	-0.269645	-0.233916	-0.442415	-0.21201	-0.440017	-0.309579	-0.239123	-0.261217	-0.273942	-0.144935	-0.339111	-0.320282	-0.360795	0.147581	-0.291113	-0.275621	-0.0874642	-0.237475	-0.0226096	-0.295296	-0.300043	-0.102953	-0.362497	-0.0257535	-0.282388	-0.453675	-0.427447	-0.161668	0.138814	-0.187604	-0.312176	-0.315033	-0.451025	-0.0506852	-0.0816341	-0.1078	-0.0543678	-0.0843761	-0.0302336	0.0607332
cg21901488	0.207474	0.188163	0.227419	0.0427888	-0.03052	0.0324555	0.274037	-0.0530806	0.273521	0.223256	0.306758	0.20092	0.169143	0.232598	0.132515	0.326349	0.201665	0.0752313	-0.00299625	0.0932431	0.127953	0.217052	-0.119362	0.17449	0.187548	0.107486	-0.024802	0.233005	0.226468	0.261746	0.270663	0.205973	0.103985	0.239266	0.144021	0.100747	0.0988362	-0.21696	0.111526	0.167832	0.270705	0.173339	0.143599	0.150196	0.119157	0.191837	0.165575	0.0170219	0.0624063
cg22542731	0.0779926	0.052139	0.111226	0.00673138	-0.0755444	0.00844898	0.142435	-0.034707	0.136935	0.0248042	0.138418	0.0720038	0.0595421	0.108681	0.026855	0.117931	0.13114	0.120195	-0.00301399	-0.0234831	0.048113	0.106652	-0.0133054	0.140075	0.126005	0.0638481	0.00670125	0.0995035	0.0634613	0.140074	0.232514	0.0590606	-0.0596464	0.143455	0.115377	0.0341357	-0.0125255	-0.217584	0.0874829	-0.0182742	0.158023	0.148421	0.132627	0.0240319	-0.062103	0.107456	0.0507921	-0.000499621	-0.0150571
cg23966569	0.1273	-0.110513	-0.235348	-0.0178989	-0.14157	0.0311198	-0.0557402	-0.0121924	-0.157622	-0.166399	-0.0398184	-0.081927	-0.13167	-0.156327	-0.0400956	0.0103947	-0.152606	0.0880848	0.252836	-0.229753	-0.0305985	-0.107156	0.187905	-0.0224569	0.0666997	-0.0786594	-0.111829	-0.140394	-0.19184	-0.183525	-0.0700422	-0.0503037	-0.12482	-0.117658	-0.10024	-0.075742	0.094859	0.0214689	0.0360605	-0.0318267	-0.054698	-0.102748	0.0384822	-0.0375864	-0.273424	-0.0304277	-0.0889495	-0.090228	0.16791
cg24131343	0.0835567	0.0601631	0.0105299	-0.0789939	0.275741	-0.0798408	0.047	-0.137249	0.15208	0.0358992	0.104242	0.0752015	0.168978	0.181261	-0.134742	-0.0599777	0.11137	0.0892468	-0.0746083	0.108676	-0.0345235	0.0966315	-0.00847744	0.0683732	0.0612488	0.145325	0.144862	0.149007	0.153244	0.214476	0.12372	0.0504126	0.280637	0.153926	0.103857	-0.104257	-0.0415417	-0.0607958	0.120337	0.0715389	0.0413713	0.0166786	0.187369	0.0782442	0.106	0.103209	0.184346	0.149084	0.148105
cg26342671	0.31607	-0.07695	-0.0831511	0.0371128	-0.091668	0.0402089	0.295975	-0.0699491	0.0582516	0.0427438	0.0241688	0.0165835	-0.00500417	-0.0813345	0.249148	0.0420203	0.144919	0.409991	0.170521	-0.0951855	-0.034606	0.193433	0.117422	0.215719	-0.0266123	-0.0642711	0.00111368	0.405485	0.17216	0.108984	0.223344	0.211303	-0.0758958	0.0774519	-0.08162	-0.0569037	0.0178813	0.197189	0.0772299	-0.056922	-0.0433508	-0.0403094	-0.0636359	0.121087	0.0344469	0.0472854	0.43203	0.0117072	0.0873042
cg00008737	0.0699539	0.0149243	0.0380928	-0.0701902	-0.117572	-0.0585046	0.106063	-0.100261	0.0385521	0.144772	0.200071	0.0207786	-0.0887394	-0.0393941	-0.0200939	0.0242931	-0.0565927	-0.076318	0.184504	-0.116318	-0.060747	-0.0355349	-0.183713	0.0224985	-0.154242	-0.0831482	-0.0507176	0.0266695	-0.000531054	-0.0567559	0.00070027	0.0103616	-0.0982062	-0.0121097	0.0670135	-0.100522	-0.0149124	-0.136134	-0.0683263	0.0178613	0.0305948	0.104245	0.0384528	-0.092604	-0.0638669	-0.0120554	-0.123585	0.0103749	-0.145378
cg00908733	-0.06912	0.0114287	-0.00554155	0.114872	0.0323401	-0.153947	-0.170076	0.0447481	-0.0627008	0.127251	-0.0528999	-0.0598874	-0.175246	-0.0293279	-0.0784066	-0.193226	-0.000399397	0.0296995	0.0936088	0.0324795	0.057129	-0.150099	0.020988	0.0288494	0.00488699	0.0058315	0.0985876	-0.207041	-0.0775372	-0.0772389	-0.191087	-0.0760469	-0.0225956	0.033967	-0.0227301	0.0499406	0.00679039	-0.103644	0.0050039	-0.0153944	0.0173808	0.0757058	0.00158629	-0.023123	0.0077432	-0.113294	-0.158429	0.0536011	0.00327736
cg03104309	0.0611084	-0.0317993	-0.250522	0.0866549	-0.124884	0.0855062	0.0201359	-0.150787	-0.198499	-0.142622	-0.0606856	-0.121075	-0.0425905	-0.0320638	-0.0693681	-0.0922777	-0.110248	0.0101904	0.268469	-0.14873	-0.0626273	0.0407887	0.237456	-0.190868	-0.0609192	-0.0845579	-0.0456375	-0.075713	0.0866147	-0.0894293	-0.00586827	-0.0945942	0.0958801	-0.0547064	0.114746	-0.286255	-0.154366	0.0430928	0.0321991	-0.0605105	-0.14035	-0.102935	-0.20919	-0.170392	-0.178499	-0.00236489	0.0403445	0.0496415	0.096976
cg04139465	-0.14372	0.0376598	-0.149794	-0.203194	-0.0495726	-0.27982	0.0110165	0.0159074	-0.0891729	0.0236341	-0.0961892	-0.0508472	-0.125863	-0.0104203	-0.0270918	-0.0694564	-0.0912141	0.0243957	0.246111	-0.0977219	0.00341793	0.0152221	0.0353779	-0.115098	0.0255831	-0.00808268	0.159651	-0.193423	0.125187	-0.10286	-0.167397	0.0064812	-0.00161285	-0.118881	-0.0889864	-0.133156	0.013598	-0.109195	-0.0467745	-0.0368362	0.0440868	0.0542953	-0.193148	-0.146079	-0.0124282	-0.00777433	-0.0609772	0.102116	0.096119
cg04518195	-0.225109	0.155639	0.16063	-0.0976912	0.114181	-0.0150609	0.209045	0.0642872	0.18513	0.155459	0.0690749	0.05762	-0.0131743	0.0991565	0.0227576	-0.0517878	0.132847	-0.0276563	0.0992756	0.134227	0.0628149	0.0450187	-0.154645	-0.0192094	-0.00630225	0.145488	0.166206	0.0988707	0.0742862	0.0180987	-0.0448675	0.129919	0.0774419	0.0804688	0.0477986	0.0233007	-0.00442961	-0.0439817	-0.00746793	0.097736	-0.0920653	0.194043	-0.0216526	0.0677195	0.0450946	0.0209754	0.0462725	0.21937	-0.0103114
cg04996728	0.043405	0.00753591	0.0921489	0.0647219	-0.0415313	0.0337497	0.0789187	-0.0911454	0.10513	0.00357506	0.0099346	0.0542509	0.0356211	0.0878999	0.0291513	0.0981263	0.0888027	-0.000292083	-0.0382225	0.0690401	0.0761809	0.0364531	0.120872	0.0615063	0.137345	0.0826184	0.0657883	0.0764013	0.0143624	0.0408729	0.0430008	0.0709283	0.0577988	0.073319	0.057363	0.0407092	0.240927	-0.338117	0.0728672	0.116069	0.150723	-0.00141915	0.0653244	0.0571575	-0.084162	0.153143	0.0373242	0.0766904	0.0429985
cg05825702	0.239448	0.400708	0.416423	-0.395202	0.288326	-0.0704832	0.237112	0.401112	0.452601	0.434036	0.535117	0.435985	0.146241	0.45779	0.266064	0.196947	0.530207	0.335012	0.578512	0.292758	0.103104	0.313144	-0.212265	0.374261	0.364295	0.411935	0.36713	0.201453	0.345528	0.284888	0.168955	0.266441	0.418957	0.512211	0.442888	0.17534	0.225416	-0.300974	0.440558	0.322609	0.367127	0.407475	0.273681	0.29543	0.398724	0.427046	0.266183	0.458212	0.221606
cg05886689	0.266288	0.262551	0.235612	-0.282099	0.091637	-0.235941	0.125101	0.107099	0.255712	0.194048	0.330061	0.234454	0.158889	0.364878	0.155053	0.216931	0.282205	0.201155	0.347867	0.148772	0.0233314	0.26326	-0.100695	0.19475	0.240067	0.251689	0.208699	0.1374	0.361142	0.27466	0.151796	0.174594	0.304843	0.35002	0.363832	-0.00623546	0.181268	-0.348497	0.30119	0.292481	0.304206	0.22205	0.0800925	0.0903635	0.265719	0.333942	0.25649	0.251342	0.21839
cg08280044	0.09985	0.196516	0.211024	-0.0243234	0.227473	-0.118738	0.0170563	0.125454	0.212308	0.416157	0.200359	0.183847	0.166789	0.235217	0.0376049	0.112298	0.222578	0.0106742	0.136002	0.202334	0.0162695	0.169422	-0.0368184	0.126326	0.162488	0.256403	0.176274	0.09325	0.293859	0.315882	0.129598	0.143137	0.265305	0.289451	0.221742	0.0172257	0.096842	-0.250783	0.202929	0.139641	0.192921	0.224749	0.192485	0.0231431	0.311196	0.119372	0.12924	0.201969	0.154529
cg11738530	0.0585204	0.243416	0.277698	-0.130142	0.203973	-0.027031	0.340766	0.201962	0.290127	0.391071	0.339894	0.269765	0.216077	0.298819	0.180499	0.312694	0.339574	0.187024	0.254465	0.17479	0.111736	0.292676	0.00688705	0.230202	0.274649	0.276688	0.223261	0.238271	0.335554	0.318466	0.218722	0.285247	0.247301	0.353487	0.265794	0.146222	0.31292	-0.270786	0.294145	0.325197	0.272002	0.207751	0.0850879	0.263566	0.175608	0.295437	0.28176	0.236384	0.254048
cg11798360	0.0706382	-0.159491	-0.119073	0.172496	-0.105503	0.0285747	0.101316	-0.0487346	-0.0641969	-0.0852059	-0.0669316	-0.129703	-0.149738	-0.141068	-0.0210772	-0.220852	0.0585158	0.151995	0.129615	-0.160215	-0.0206729	-0.0228933	0.141092	0.069939	-0.10031	0.0328723	0.130217	0.083808	-0.0619351	-0.1107	-0.0259086	-0.00827244	-0.0097504	0.0582868	-0.0365454	-0.134866	-0.0906671	0.00680101	0.00491683	-0.118749	-0.213069	-0.150446	-0.00718076	0.0192497	-0.0485891	0.0288729	0.0334595	0.0884113	0.0335476
cg13717553	0.100095	0.366019	0.256419	-0.261938	0.144719	0.0649611	0.1936	0.211229	0.294859	0.31152	0.303889	0.289547	0.214399	0.393113	0.149394	0.023188	0.333486	0.268999	0.211601	0.261428	0.17191	0.266426	-0.135747	0.222947	0.28818	0.21327	0.287873	0.153357	0.315191	0.2639	0.125678	0.253103	0.288175	0.344228	0.392684	0.0890531	-0.0137564	-0.224223	0.271586	0.241541	0.220641	0.382348	0.139496	0.119776	0.255334	0.23584	0.209365	0.245349	0.14993
cg16212298	0.153671	0.195443	0.244063	-0.217091	0.0355856	-0.159724	0.225937	0.0927533	0.209168	0.319077	0.306428	0.182948	0.0877184	0.264524	0.204141	0.209315	0.269465	0.181562	0.361978	0.149962	0.069083	0.215209	-0.0325238	0.204725	0.224246	0.160957	0.138866	0.119877	0.233227	0.214016	0.149364	0.206361	0.224831	0.308195	0.315154	0.082575	0.2298	-0.292735	0.236499	0.277296	0.268303	0.230981	0.0320516	0.154307	0.147925	0.267667	0.179304	0.186788	0.163374
cg16234274	-0.0249796	0.0374385	0.145257	-0.084636	0.189075	-0.118398	0.144918	-0.0870614	0.256337	0.255173	0.106936	0.0633661	0.0782819	0.148157	-0.024263	0.0836584	0.114314	0.052125	-0.0601986	0.13689	0.0513652	0.0698489	-0.13421	0.0546291	-0.0348507	0.139776	0.126774	0.24313	0.112352	0.171494	0.138921	0.133664	0.158165	0.128124	0.0803731	-0.0297313	0.0691526	-0.185809	-0.0506773	0.124294	0.164543	-0.00630828	0.0901463	0.141921	0.0997118	0.136292	0.0847485	0.111503	0.066077
cg20508187	0.0651647	-0.137456	0.0540425	0.0548926	-0.0512887	-0.0107919	0.0336643	0.0393178	0.0793193	-0.020986	0.00927574	-0.122212	-0.0584152	-0.159481	-0.00362766	-0.00197411	-0.0267338	-0.170831	-0.023936	-0.0180037	-0.245084	-0.0953886	-0.0963956	-0.0580092	-0.0990242	0.0510279	-0.204829	0.109351	-0.104109	-0.0135455	0.0565893	-0.0630804	0.00745313	-0.0235221	-0.179366	-0.00240594	-0.0817715	0.0884493	-0.101666	-0.071809	-0.148147	0.0567625	0.156939	0.142183	0.103316	-0.0970079	-0.086767	0.0518112	-0.112358
cg21055576	0.139621	-0.0856311	-0.199491	0.147061	-0.0209319	-0.150491	0.112455	-0.0309459	-0.129211	-0.219946	-0.18254	-0.110217	-0.0398034	-0.117883	0.061407	-0.216309	-0.0486945	0.0761366	-0.0522524	-0.0598457	0.186626	0.0277237	0.117191	-0.0812659	-0.0549819	-0.0995396	-0.0218624	0.032532	-0.144476	-0.124461	0.0667126	0.0370519	0.0601839	-0.0322593	-0.162132	-0.000607338	-0.136315	0.0636495	-0.0600682	-0.128339	-0.203346	-0.107583	-0.0691525	0.116162	-0.0432835	-0.0104908	0.00897426	0.0177225	0.052541
cg24439315	0.0598522	0.367684	0.410953	-0.380477	0.176819	-0.378135	0.226379	0.331182	0.406176	0.462258	0.411077	0.391102	0.115303	0.395561	0.252621	0.206558	0.403687	0.236117	0.356799	0.276138	0.180451	0.217883	-0.17081	0.301574	0.36768	0.352153	0.258606	0.09641	0.33088	0.207814	0.0773329	0.22462	0.229625	0.393533	0.364889	0.262754	0.270308	-0.392213	0.286444	0.349186	0.384194	0.468477	0.160195	0.261575	0.307351	0.316167	0.158859	0.325991	0.114816
cg24476761	-0.0272256	0.28047	0.25026	-0.18101	0.0631282	0.0154093	0.286936	0.103057	0.245182	0.3476	0.331379	0.24653	0.216432	0.227773	0.164496	0.299857	0.253703	0.114244	0.209806	0.186183	0.119628	0.226102	-0.0514929	0.0796545	0.202426	0.184774	0.162226	0.157714	0.32039	0.204708	0.106494	0.147289	0.191426	0.266912	0.278247	0.119955	0.211585	-0.298554	0.231125	0.195945	0.178659	0.227773	0.0106397	0.0672614	-0.0233484	0.167304	0.169904	0.207619	0.197772
cg26629969	0.18416	0.33432	0.279358	-0.413981	0.202092	-0.127323	0.152934	0.345436	0.302826	0.335994	0.402293	0.329924	0.0586106	0.3569	0.246257	0.108081	0.388295	0.251602	0.58371	0.207511	0.08681	0.2013	-0.169434	0.253817	0.274057	0.257637	0.26456	0.123986	0.245598	0.203667	0.0894588	0.17185	0.29223	0.379578	0.36372	0.103318	0.160114	-0.257667	0.300664	0.262938	0.227506	0.345618	0.214359	0.164508	0.317372	0.314631	0.145228	0.387457	0.131899
cg27073079	-0.0323335	-0.103577	-0.0887173	0.314306	-0.0729127	-0.0506947	-0.115191	-0.118296	-0.107439	-0.165453	-0.130655	-0.0741657	-0.100143	-0.0784497	-0.16035	-0.153323	-0.0937471	-0.176742	-0.23597	-0.0646526	-0.0905163	-0.11535	0.0566114	-0.107821	-0.0667611	-0.0843305	-0.0537086	-0.113055	-0.127924	-0.0139215	-0.136663	-0.121404	-0.054368	-0.0166918	-0.132366	-0.0467737	0.0236125	-0.0807709	-0.059079	0.000656117	-0.17531	-0.0927192	-0.0533932	-0.0662493	-0.0906135	-0.125013	-0.0733478	-0.0569527	-0.0765192
cg01808723	-0.0659439	-0.0631608	-0.129666	0.163431	-0.0624676	0.0245446	-0.263144	-0.176734	-0.251874	-0.104055	-0.394402	-0.178797	-0.336546	-0.203744	0.00348834	-0.105461	-0.326551	-0.199728	-0.185355	-0.162726	0.127233	-0.490715	0.114989	-0.1583	-0.221875	-0.13174	-0.24243	-0.143335	-0.148817	-0.197016	-0.395863	-0.466391	-0.429247	-0.401932	-0.229166	-0.0136524	0.0422788	0.163952	-0.379261	-0.146703	-0.168977	-0.176364	-0.276033	-0.341239	-0.244035	-0.386784	-0.223842	-0.180987	-0.230081
cg02295821	0.030443	0.0494208	0.00317294	0.0955004	-0.184833	0.155977	-0.0243958	-0.0817122	-0.103452	-0.0254037	0.00399136	0.0379085	-0.061467	0.116276	-0.122486	-0.0253288	-0.0799054	0.0778739	-0.0353049	-0.00400325	-0.129865	-0.00898748	0.0445461	-0.0424991	0.107354	-0.0378249	-0.0666763	-0.13309	0.089908	0.164549	-0.0523151	-0.0183322	-0.0613995	-0.0293333	0.108135	-0.0173025	-0.122292	-0.0208494	0.0173733	-0.0686576	0.182506	0.142121	-0.134158	-0.0330284	0.0264482	-0.02291	-0.0285728	-0.169708	-0.0410244
cg03721362	-0.0475889	-0.0383719	-0.107734	-0.0655776	-0.109852	0.116132	-0.0952085	0.0672399	-0.138867	-0.0509764	-0.0735696	-0.0705311	-0.109882	-0.14579	0.0864377	-0.0688177	-0.141427	0.0517145	0.188162	-0.133131	-0.057314	-0.148631	0.0659122	-0.0218844	-0.0703433	-0.125921	-0.0357282	-0.113403	-0.125986	-0.168619	-0.0924917	-0.171984	-0.126739	-0.0826277	-0.0527205	-0.0896368	0.0564606	0.178877	-0.0618204	0.011143	-0.0159345	-0.0441008	-0.0844879	-0.0932481	-0.123674	-0.099123	-0.0862311	0.0513174	0.0253807
cg04280969	-0.082083	-0.0153773	-0.059269	-0.0484365	-0.162277	0.0769871	0.132607	0.0392939	-0.0356974	-0.0618117	-0.00480446	0.0191767	-0.0366772	-0.119037	0.217165	0.049145	-0.0656836	0.155757	0.10938	-0.103919	0.0853584	-0.0468396	0.0512249	0.0773103	-0.00674865	-0.0983555	-0.0526524	-0.0326647	-0.175105	-0.18254	-0.00010633	0.0273764	-0.129965	-0.0222428	0.0012593	0.0928079	0.138756	0.213957	-0.00501025	0.0621871	0.0820528	-0.00279895	-0.0885784	0.11023	-0.151811	0.00235451	-0.0248104	-0.0098579	0.0610119
cg04609576	0.0286843	-0.247271	-0.161867	0.0328435	-0.159614	0.0942426	-0.17042	-0.00670706	-0.1376	-0.129031	-0.0728053	-0.183868	-0.306784	-0.239059	-0.0828648	-0.059724	-0.255693	-0.122993	0.147458	-0.271948	-0.164665	-0.364266	0.155856	-0.103989	-0.0928068	-0.145559	-0.14973	-0.174779	-0.192002	-0.248023	-0.255628	-0.378512	-0.180235	-0.1886	-0.257638	-0.129402	0.147083	0.136676	-0.118852	0.0505627	-0.0545928	-0.101059	-0.133429	-0.0779946	-0.180664	-0.00623663	-0.154912	-0.0885973	-0.0152047
cg05648672	-0.0774921	0.000971483	0.00536833	-0.049883	-0.145873	0.0525498	0.2224	0.0232747	0.0394187	-0.0268284	0.0531371	0.0696992	0.00592081	-0.0852991	0.249888	0.100107	-0.0027132	0.185716	0.0695905	-0.072554	0.135072	0.00398322	0.027124	0.13469	0.0424794	-0.0586127	-0.0342605	0.0213288	-0.154711	-0.156463	0.0483966	0.106193	-0.103792	0.0185013	0.0398067	0.159869	0.170832	0.172893	0.0452424	0.103073	0.123835	0.0198205	-0.0730984	0.211961	-0.13329	0.0471565	0.0125003	-0.0137129	0.0703639
cg06506523	-0.113148	-0.0648098	-0.168524	0.042132	-0.0907518	0.00288685	-0.0315604	-0.242607	-0.158525	-0.0569878	-0.0887624	-0.100248	-0.13016	-0.0200043	-0.176636	-0.189816	-0.166264	-0.0283717	-0.0167294	-0.120642	0.0395407	-0.171601	0.0338375	-0.106063	-0.161935	-0.29029	-0.162289	-0.137202	-0.0379751	0.0510587	-0.122144	-0.100819	-0.0791343	-0.127447	-0.0260289	-0.176373	-0.196609	0.111948	-0.120759	-0.191158	-0.144805	-0.0534095	-0.234303	-0.128232	-0.012587	-0.157929	-0.0709708	0.0153302	-0.0449499
cg06693511	-0.163367	0.0892793	-0.104738	-0.0622794	-0.0934331	0.00213836	-0.0377411	-0.207341	-0.149136	-0.112726	-0.118203	0.059621	-0.00182629	0.0816558	-0.140523	-0.0639871	-0.0320154	0.0635299	0.00773994	-0.135077	-0.0328872	0.00638975	0.147785	-0.0885456	0.0473731	-0.158403	0.093164	-0.244564	-0.00296006	0.091235	-0.124447	-0.01709	-0.0999392	-0.0368202	0.120338	-0.0391396	-0.0853545	-0.0182165	0.0893013	-0.142746	0.0361006	-0.0032814	-0.188993	-0.0135501	-0.0724919	-0.0576358	0.00072224	0.0324925	-0.0302245
cg06697380	-0.113236	-0.63686	-0.531884	0.274935	-0.148618	0.0683758	-0.445767	-0.391373	-0.424561	-0.359391	-0.590725	-0.621534	-0.521101	-0.613385	-0.444165	-0.363419	-0.582557	-0.447121	-0.103463	-0.483139	-0.40108	-0.747609	0.349047	-0.526295	-0.405512	-0.326053	-0.387131	-0.409784	-0.426262	-0.405101	-0.453061	-0.68185	-0.492485	-0.671819	-0.645337	-0.410363	-0.115667	0.2887	-0.500032	-0.515532	-0.446435	-0.473279	-0.331834	-0.409145	-0.3987	-0.269445	-0.354808	-0.099027	-0.0482417
cg06940792	0.100315	-0.226372	-0.0239014	0.0380671	0.00958441	0.0543828	-0.070575	0.0413832	0.0553493	0.0104865	0.0926931	-0.0764207	-0.240725	-0.108147	-0.0256339	0.0120424	-0.0766769	-0.057057	0.147374	-0.163084	-0.143535	-0.263423	0.109512	0.0201585	0.017611	0.0112157	-0.0895003	0.013051	-0.0432257	-0.0785178	-0.165521	-0.279812	-0.0504738	-0.0508988	-0.238697	-0.0803966	0.160941	0.0589915	-0.0150827	0.150201	0.00745045	0.0122733	-0.000568216	0.0365577	-0.00911437	0.111075	-0.00381891	-0.0184173	0.0196285
cg07886142	0.215354	-0.0347377	-0.160105	-0.0408425	-0.152648	0.0434045	0.0686117	-0.254917	0.0261884	-0.128398	-0.00915044	-0.0306317	0.0311562	-0.017511	0.0211736	0.108189	-0.0638077	0.111709	0.190739	-0.21339	0.091548	0.00200091	0.0805935	0.000725833	-0.0372195	-0.207129	-0.186851	0.0949676	-0.104372	0.0397377	0.166974	0.0110516	-0.0741705	-0.055481	0.033261	-0.131307	-0.1219	0.127984	-0.0364799	-0.10268	0.021079	-0.0462083	0.015853	0.0639951	-0.0967334	0.13788	0.147845	-0.0325698	-0.00795882
cg08874609	0.0227415	-0.334442	-0.220804	0.0737157	-0.201111	0.104772	-0.232341	-0.100133	-0.202473	-0.14909	-0.127346	-0.266857	-0.372788	-0.328613	-0.106511	-0.0492238	-0.337374	-0.208599	0.132143	-0.335025	-0.175877	-0.435282	0.186812	-0.160916	-0.134967	-0.187951	-0.236479	-0.214007	-0.208518	-0.304644	-0.314357	-0.432602	-0.234718	-0.294818	-0.345106	-0.162356	0.151234	0.136631	-0.193487	0.00627438	-0.105245	-0.163233	-0.168686	-0.126866	-0.237697	-0.0588759	-0.206513	-0.178975	-0.0587637
cg11565512	-0.264814	-0.573254	-0.49479	0.288731	-0.214577	0.0262108	-0.497976	-0.370015	-0.511137	-0.403605	-0.656065	-0.629404	-0.736098	-0.608242	-0.430424	-0.454352	-0.625216	-0.524211	-0.107712	-0.428191	-0.24333	-0.846515	0.340396	-0.472378	-0.410304	-0.325215	-0.330525	-0.486163	-0.495925	-0.471493	-0.663015	-0.650706	-0.600792	-0.701241	-0.689498	-0.335396	-0.11893	0.327707	-0.580319	-0.430664	-0.53228	-0.337533	-0.365811	-0.496576	-0.435259	-0.394003	-0.515533	-0.0875066	-0.192818
cg17536465	-0.0860937	0.114552	-0.0978015	0.0705172	0.151857	0.111553	0.180287	-0.0482028	0.00493042	0.134459	0.0219389	0.117019	0.0646937	0.0556208	0.012228	-0.0896346	0.136822	0.0466972	-0.00724106	-0.0245528	-0.0719742	-0.0134417	0.133777	0.0344982	0.056574	-0.00534241	0.0766529	0.000851264	-0.085038	0.189923	0.0126749	-0.0185256	0.0564835	0.126021	0.0304598	-0.193371	-0.0213485	0.0120272	0.212135	-0.060005	-0.104621	0.153279	0.0487444	-0.143136	-0.0342722	-0.0100353	0.100191	0.289951	0.197001
cg19552640	-0.259058	-0.546257	-0.47953	0.275552	-0.208762	0.0435228	-0.481541	-0.34713	-0.494406	-0.392966	-0.644759	-0.595568	-0.718995	-0.592619	-0.382961	-0.427001	-0.603552	-0.496591	-0.0928806	-0.41868	-0.248462	-0.829815	0.343559	-0.447242	-0.387009	-0.31236	-0.310866	-0.473717	-0.486405	-0.44516	-0.646596	-0.63397	-0.608652	-0.691316	-0.678861	-0.313117	-0.0815185	0.353494	-0.558942	-0.415021	-0.506209	-0.322774	-0.356555	-0.489605	-0.428854	-0.382282	-0.488636	-0.0636379	-0.175915
cg23018092	0.115431	-0.0610739	0.108776	-0.0580989	0.0218135	0.0979247	-0.00344803	0.163953	0.14023	0.0267893	0.215614	0.016644	-0.122555	0.0321783	-0.0153442	0.0453052	0.0288472	-0.0338792	0.126109	-0.0700472	-0.0588744	-0.152154	0.00993316	0.0905401	0.0682161	0.0627268	0.0256834	0.0167468	0.0395859	-0.0660402	-0.11221	-0.20722	0.0863219	0.0789702	-0.0939595	0.0321564	0.204552	-0.0158812	0.0530573	0.27944	0.0961539	0.0483131	0.0310294	0.140946	0.075515	0.227858	0.0162118	0.0485277	0.0507417
cg23425242	-0.0478557	0.0266127	-0.112038	0.058511	0.111031	0.0505715	0.105453	-0.193937	0.0319209	0.0816762	-0.0140445	0.00709579	0.0372109	0.010746	0.125189	-0.0133234	-0.0512411	-0.0753929	-0.0892151	-0.090451	0.119925	-0.105096	0.1303	-0.0217821	-0.0465542	-0.00436902	-0.0653546	0.137044	0.0718703	0.0161353	-0.0176009	-0.156759	0.0345624	-0.0792504	0.0156434	-0.220412	0.0570684	0.126891	-0.0100856	-0.0134721	-0.07594	-0.0863702	-0.128808	-0.0652922	-0.024856	-0.0528565	0.0679456	0.0730703	0.113742
cg23932859	-0.0524449	0.00307018	-0.000272534	-0.0525049	-0.125154	0.0612859	0.230812	0.0364681	0.0477456	-0.00573906	0.0585397	0.0703194	0.027194	-0.0728976	0.276827	0.0981561	0.0120349	0.215159	0.0964556	-0.0764107	0.125146	0.0320214	0.0271418	0.14611	0.0418605	-0.0580759	-0.0194291	0.0314777	-0.123339	-0.148047	0.0788871	0.117153	-0.0759023	0.035198	0.0519084	0.148922	0.163413	0.17476	0.0540382	0.102963	0.132725	0.018122	-0.0637015	0.221384	-0.107211	0.0742823	0.0288573	-0.00797112	0.0926161
cg26429266	-0.189108	-0.274453	-0.360998	0.22636	-0.110273	0.0184223	-0.325806	-0.244651	-0.403283	-0.255209	-0.415291	-0.338688	-0.45225	-0.377378	-0.362046	-0.256913	-0.487753	-0.432508	-0.115735	-0.285645	-0.122204	-0.602893	0.352394	-0.418763	-0.247121	-0.281733	-0.334609	-0.388161	-0.243342	-0.21288	-0.541487	-0.565446	-0.394376	-0.529708	-0.460552	-0.206118	0.0249881	0.278266	-0.358377	-0.315792	-0.353972	-0.197963	-0.388376	-0.396026	-0.268187	-0.316602	-0.322854	-0.011554	-0.0644722
cg26450275	-0.0685887	-0.0378453	0.0820361	0.0581786	0.151938	-0.0297278	0.138419	-0.0208994	0.138185	0.0879026	0.0441203	0.0680287	0.232177	0.0980625	-0.176986	-0.0840308	0.116148	0.0269215	-0.186788	0.0867146	-0.169592	0.0910255	-0.112236	0.0576533	-0.00984831	0.087357	0.0754118	0.0943939	0.104439	0.191797	0.228988	0.00352722	0.175384	0.137718	0.15485	-0.075666	-0.181481	-0.0760827	0.16058	-0.0813871	0.0925716	0.0453121	0.0794614	0.133415	0.184557	-0.0374351	0.0654332	0.0358281	0.0487291
cg26465611	-0.247254	-0.580384	-0.502313	0.285869	-0.224285	0.0779392	-0.500148	-0.406199	-0.507013	-0.39817	-0.60524	-0.615616	-0.668716	-0.604259	-0.377108	-0.373993	-0.65342	-0.516651	-0.14814	-0.462781	-0.238298	-0.78627	0.270191	-0.468002	-0.433434	-0.331011	-0.41094	-0.406562	-0.490756	-0.465271	-0.57275	-0.657886	-0.570025	-0.727081	-0.681288	-0.403098	-0.149652	0.34315	-0.579722	-0.382138	-0.492505	-0.349475	-0.298406	-0.514019	-0.426341	-0.493486	-0.487269	-0.22268	-0.279078
cg27346707	-0.0298915	-0.397694	-0.294938	0.0871164	-0.241972	0.0863594	-0.276176	-0.185784	-0.267378	-0.147374	-0.220172	-0.342494	-0.441112	-0.422218	-0.136289	-0.0625459	-0.442216	-0.253992	0.13501	-0.400098	-0.228292	-0.500219	0.204163	-0.242877	-0.201383	-0.236224	-0.301668	-0.266241	-0.246287	-0.350753	-0.36828	-0.482169	-0.336264	-0.407532	-0.412013	-0.217882	0.135197	0.190543	-0.293555	-0.0585636	-0.141888	-0.199769	-0.236585	-0.217733	-0.321622	-0.154851	-0.269388	-0.220335	-0.100261
cg27372162	-0.108474	-0.364882	-0.121824	0.0471997	0.012005	0.10141	-0.272566	-0.0656118	-0.109705	-0.0807303	-0.120795	-0.273355	-0.39969	-0.26846	-0.233402	-0.0835044	-0.262482	-0.289737	0.0444229	-0.226686	-0.176333	-0.514691	0.0750401	-0.139136	-0.121055	0.00710338	-0.210396	-0.158336	-0.194977	-0.2175	-0.352607	-0.476551	-0.209323	-0.28512	-0.380873	-0.157332	0.0773158	0.0785312	-0.219389	-0.0356808	-0.134138	-0.119908	-0.0127574	-0.163473	-0.134701	-0.156409	-0.250218	-0.0992318	-0.143125
cg00101227	-0.00105482	-0.18145	-0.549337	0.266639	-0.534114	0.144853	-0.26742	-0.372645	-0.661589	-0.384736	-0.537011	-0.376265	-0.332324	-0.406152	-0.0297461	-0.168484	-0.606736	-0.278469	-0.0423938	-0.499187	-0.118283	-0.349645	0.27313	-0.470852	-0.39021	-0.766979	-0.510704	-0.431508	-0.299498	-0.346637	-0.376375	-0.426437	-0.530315	-0.574068	-0.280743	-0.285605	-0.201635	0.331697	-0.428161	-0.399861	-0.380539	-0.320291	-0.652495	-0.511887	-0.51205	-0.467334	-0.311503	-0.396071	-0.215951
cg00259886	-0.00872105	-0.471122	-0.632878	0.33858	-0.499437	0.167439	-0.334439	-0.360954	-0.630281	-0.424562	-0.538544	-0.51155	-0.477018	-0.61665	-0.131037	-0.161735	-0.648635	-0.264713	0.142264	-0.57754	-0.249876	-0.450538	0.383842	-0.492442	-0.348875	-0.597497	-0.477562	-0.431029	-0.428982	-0.44829	-0.355597	-0.4037	-0.535016	-0.670736	-0.487532	-0.313767	-0.131061	0.497604	-0.471895	-0.441758	-0.415256	-0.447586	-0.501516	-0.415852	-0.51117	-0.310289	-0.315149	-0.421356	-0.15127
cg10431340	-0.149225	0.056025	0.154508	0.0731356	0.0132144	0.0700397	0.150184	-0.0835489	0.216925	0.142046	0.0691298	0.0725797	0.120613	0.155782	-0.0504576	0.152823	0.096711	-0.0175469	-0.244522	0.106394	0.14017	0.0379943	-0.022497	0.102982	0.0818562	-0.0213195	-0.00704103	0.113357	0.145263	0.164186	0.0667155	0.0578925	0.150885	0.0773741	0.0958981	0.0411317	0.0232255	-0.229285	0.0405226	0.0696238	0.0937763	0.080131	-0.0353622	0.0728198	0.0430534	0.11033	0.0788608	0.0440702	0.0739903
cg10896862	-0.0443626	0.283551	0.144957	-0.0630391	0.226357	0.0564366	-0.046772	0.083184	0.0460642	0.141727	0.105673	0.166925	0.209357	0.255414	0.161711	-0.00366003	0.258498	0.0952041	-0.0711095	0.147921	0.0880022	0.118868	-0.072382	0.151812	0.0436516	0.179293	0.153288	-0.0352782	0.217571	0.110538	0.0380958	-0.0811472	0.272655	0.262777	0.267983	0.00725477	-0.0444664	-0.0901191	0.221	0.11841	0.0519206	0.0515931	0.103747	-0.0380697	0.288792	-0.0978586	0.0593187	0.242892	0.0414558
cg11214962	-0.0256843	-0.368079	-0.65599	0.348552	-0.616742	0.117221	-0.362225	-0.441799	-0.780689	-0.508891	-0.643002	-0.531309	-0.48651	-0.596604	-0.11654	-0.215117	-0.74475	-0.375971	0.0100655	-0.581597	-0.160134	-0.459918	0.357445	-0.606488	-0.479894	-0.791942	-0.59356	-0.495872	-0.434705	-0.505564	-0.442356	-0.50024	-0.610503	-0.699854	-0.469166	-0.306631	-0.217306	0.382511	-0.573619	-0.485901	-0.498371	-0.439809	-0.656065	-0.52115	-0.648661	-0.501695	-0.438478	-0.433532	-0.246932
cg13210580	-0.0914116	0.252938	0.110075	-0.0824723	0.170134	0.0475467	-0.0296131	0.08018	0.0111831	0.0127889	0.0921026	0.113191	0.0914085	0.186956	0.00133958	-0.143341	0.176056	0.00100383	-0.0662358	0.0902202	0.119422	0.052361	-0.0960671	0.0933877	-0.0700203	0.195242	0.168146	-0.0667229	0.138543	0.0166414	-0.107515	-0.0947657	0.281641	0.188045	0.165793	-0.0256308	-0.0470252	-0.124668	0.179228	0.0566115	-0.0552856	0.0155943	0.0201955	0.00081279	0.21519	-0.0782886	0.0198116	0.242293	0.0123146
cg01198024	-0.0651835	0.171478	0.162295	-0.149378	0.0024258	0.0775997	0.0428909	-0.087603	0.106192	0.114292	0.166127	0.132294	0.143587	0.173938	0.0116383	0.336762	0.0726339	-0.097331	-0.0481422	0.0262664	0.0498836	0.0813941	-0.0775135	0.00862155	0.128032	0.0658038	-0.0297729	0.110821	0.155665	0.251283	0.0956555	0.0316247	-0.0290489	0.0676408	0.130693	-0.0088275	0.0704578	-0.0822647	0.0646731	0.0990134	0.197684	0.0913395	0.0734574	-0.0766137	0.041224	0.0343881	0.0679123	-0.0124002	-0.0290744
cg01790083	0.0612986	0.454343	0.486699	-0.379463	0.287407	-0.0641512	0.393307	0.229633	0.472278	0.417038	0.508676	0.474333	0.460346	0.602296	0.173095	0.431134	0.483305	0.309344	-0.0872445	0.340875	0.173811	0.429919	-0.26872	0.448626	0.393014	0.402904	0.265167	0.361302	0.519385	0.512608	0.288314	0.356721	0.336458	0.500121	0.442221	0.243634	0.308063	-0.540536	0.445687	0.484498	0.497959	0.302453	0.254831	0.241777	0.318231	0.347256	0.409021	0.109352	0.276211
cg03951121	0.114762	-0.0286603	0.0486937	0.0942096	-0.154086	0.0556679	-0.0154926	-0.0555037	-0.0664815	-0.0706172	-0.0248832	-0.0666487	-0.0798392	-0.0614004	-0.012049	0.140157	-0.128133	-0.20556	-0.113533	0.02894	0.0279323	-0.0956021	-0.0813109	-0.192539	-0.0520829	-0.063957	-0.19342	0.105438	0.0583902	-0.0114446	0.0415702	-0.158742	-0.121674	-0.144076	-0.0141302	0.000886928	-0.0342737	0.0764279	-0.143544	0.00378176	-0.0212093	0.0262724	-0.143712	-0.0211029	0.049639	-0.106231	-0.0736808	-0.188946	-0.2324
cg22937788	-0.0459398	0.0438075	0.051703	-0.0478407	0.124121	0.00612471	0.127806	-0.0909586	0.198916	0.126215	0.0690361	0.103278	0.174396	0.114545	0.0556056	0.0309641	0.118449	0.131589	0.046701	0.070557	0.00465565	0.117183	0.0130057	0.11316	0.059471	0.148659	0.155865	0.23321	0.141552	0.18553	0.230801	0.0770192	0.123105	0.15773	0.131853	-0.0858548	0.0318968	-0.0829701	0.099964	0.0241763	0.119896	0.100678	0.163711	0.0612067	-0.00248377	0.0498191	0.126144	0.154787	0.074769
cg24082440	0.0870514	0.307067	0.430619	-0.259135	0.358267	-0.137723	0.461476	0.0302942	0.522475	0.492215	0.448941	0.375071	0.416647	0.482311	0.114685	0.286497	0.486305	0.204861	-0.12025	0.329907	0.239085	0.400926	-0.230499	0.349202	0.354193	0.367123	0.231715	0.411562	0.418291	0.487803	0.378838	0.33715	0.377778	0.49228	0.397374	0.172826	0.223468	-0.423247	0.422867	0.35288	0.446201	0.304794	0.268941	0.309264	0.288497	0.348785	0.394118	0.23757	0.291716
cg24158916	0.0484623	-0.0498451	0.0930144	-0.0849554	-0.0288603	0.100042	-0.139739	0.1197	0.00372124	-0.00349944	0.12925	-0.00241002	-0.0649477	-0.0203402	-0.149132	-0.0739725	-0.0183259	-0.127896	-0.0149138	0.0652885	0.0241538	-0.0199438	-0.178325	-0.0342594	-0.0486202	-0.0362629	-0.0137321	0.0270604	-0.00559717	0.0231088	-0.0564371	-0.0642257	0.0178329	0.0437445	-0.0727249	0.056471	-0.0979762	-0.0176694	-0.0579751	0.0209475	-0.050678	0.0956659	0.105171	-0.0101167	0.0926291	-0.0619762	-0.130566	0.0627934	-0.176886
cg03347018	-0.194268	-0.424676	-0.64984	0.369755	-0.421786	0.255631	-0.338741	-0.331514	-0.650081	-0.419489	-0.518275	-0.481277	-0.462893	-0.608521	-0.133197	-0.276584	-0.636371	-0.261515	0.152943	-0.584078	-0.345334	-0.494871	0.396538	-0.457376	-0.410142	-0.537324	-0.347555	-0.489205	-0.4791	-0.572315	-0.4389	-0.480395	-0.462277	-0.620515	-0.422262	-0.389902	-0.13418	0.417772	-0.420799	-0.408175	-0.455772	-0.459608	-0.436169	-0.45929	-0.597525	-0.414467	-0.414374	-0.318628	-0.171618
cg06102330	-0.0547112	-0.12913	-0.362362	0.253642	-0.308183	0.13268	-0.0210608	-0.131699	-0.341288	-0.318386	-0.253686	-0.117444	-0.189689	-0.318116	-0.0319121	-0.0824668	-0.394516	-0.0906389	-0.0032237	-0.296937	-0.0483975	-0.207982	0.27996	-0.286018	-0.0968009	-0.26708	-0.224349	-0.249885	-0.404571	-0.256377	-0.204068	-0.173862	-0.307007	-0.361287	-0.181287	-0.0804349	-0.0218687	0.368448	-0.204138	-0.194835	-0.153164	-0.133993	-0.289575	-0.142391	-0.463907	-0.191284	-0.182158	-0.236595	-0.101059
cg06269753	-0.0876734	-0.228915	-0.288832	0.0719004	-0.08092	0.14088	-0.0731921	0.0641483	-0.257615	-0.239301	-0.287652	-0.208762	-0.281579	-0.318918	0.0380904	-0.244037	-0.188184	0.125554	0.223496	-0.198319	-0.177409	-0.263989	0.335539	-0.128301	-0.0821059	-0.0843738	0.0613103	-0.186712	-0.190985	-0.386677	-0.236609	-0.327802	-0.0706299	-0.182517	-0.130236	-0.124382	-0.0142521	0.218183	-0.110317	-0.257654	-0.232026	-0.233203	-0.234811	0.0248688	-0.2477	-0.0565771	-0.172969	0.120894	0.0219582
cg06700209	-0.0646893	-0.073971	-0.230666	0.168385	-0.178778	0.103944	-0.151056	-0.245973	-0.320485	-0.0568892	-0.277419	-0.194659	0.0784191	-0.154067	-0.0140368	-0.0364624	-0.397941	-0.0567744	-0.185361	-0.211657	-0.20908	-0.0492388	0.1246	-0.337601	-0.206948	-0.227552	-0.279757	-0.119482	0.0543781	-0.159295	-0.0557743	-0.400521	-0.14262	-0.322365	0.0127157	-0.156992	-0.120806	-0.0313295	-0.260123	-0.136171	-0.0631825	-0.227977	-0.219521	-0.300269	-0.463462	-0.329266	-0.157213	-0.354935	-0.0730475
cg07861448	-0.158471	-0.15386	-0.356903	0.20865	-0.410008	0.0687904	-0.235949	-0.284742	-0.515635	-0.272606	-0.390068	-0.283054	-0.251988	-0.38756	-0.0148457	-0.135221	-0.540269	-0.102332	-0.0643802	-0.391301	-0.156705	-0.287274	0.177411	-0.400512	-0.397359	-0.421333	-0.336998	-0.318424	-0.252641	-0.409881	-0.349977	-0.500705	-0.442953	-0.486451	-0.16602	-0.115502	-0.12378	0.164988	-0.396654	-0.316118	-0.253129	-0.313165	-0.381174	-0.315819	-0.668308	-0.414888	-0.323049	-0.334968	-0.175415
cg09734791	0.312588	0.374153	0.447996	-0.257761	0.371369	-0.193604	0.152669	0.285266	0.43103	0.425508	0.395336	0.354306	0.359451	0.402894	0.0197717	0.0178824	0.471668	0.343531	0.0463004	0.42509	0.0820937	0.389066	-0.274663	0.395236	0.261287	0.468932	0.344478	0.259875	0.439828	0.456718	0.212059	0.298952	0.390038	0.549594	0.432803	0.221534	0.03796	-0.369355	0.407186	0.196968	0.324357	0.317293	0.298204	0.222867	0.354418	0.242981	0.299018	0.303228	0.169832
cg11382963	-0.161705	-0.345485	-0.50222	0.196848	-0.351314	0.171915	-0.216393	-0.416806	-0.456147	-0.309398	-0.460314	-0.426051	-0.182897	-0.46968	-0.184464	-0.19003	-0.564828	-0.16416	-0.0746655	-0.457799	-0.308751	-0.279756	0.251871	-0.458408	-0.422997	-0.43705	-0.364653	-0.322284	-0.290186	-0.453106	-0.287031	-0.496437	-0.303352	-0.51682	-0.190812	-0.382668	-0.222898	0.175749	-0.352682	-0.342264	-0.325803	-0.39067	-0.397897	-0.412101	-0.667086	-0.37936	-0.287604	-0.374517	-0.177807
cg12809365	-0.184004	-0.374953	-0.50712	0.204162	-0.38361	0.143428	-0.267728	-0.430447	-0.494421	-0.33176	-0.467069	-0.456515	-0.23363	-0.509772	-0.212795	-0.229385	-0.608933	-0.179691	-0.061241	-0.460253	-0.336402	-0.305744	0.207538	-0.481032	-0.459784	-0.406577	-0.345047	-0.327417	-0.335432	-0.468515	-0.344113	-0.480121	-0.338027	-0.521899	-0.222132	-0.387238	-0.263632	0.148575	-0.420634	-0.386092	-0.341884	-0.402914	-0.344904	-0.446678	-0.730257	-0.408466	-0.333521	-0.390127	-0.227955
cg13092523	-0.219875	-0.504583	-0.710647	0.44743	-0.476401	0.241575	-0.396235	-0.448021	-0.728621	-0.478672	-0.648183	-0.605623	-0.511975	-0.713363	-0.231551	-0.336837	-0.758521	-0.345014	0.0551115	-0.634175	-0.357361	-0.560005	0.411703	-0.584552	-0.504438	-0.548533	-0.436668	-0.509415	-0.52728	-0.581551	-0.457223	-0.533561	-0.540234	-0.746615	-0.520182	-0.457346	-0.217538	0.461225	-0.562185	-0.50746	-0.558666	-0.535604	-0.479059	-0.51152	-0.646579	-0.531469	-0.478016	-0.383982	-0.234572
cg13620034	-0.0465489	-0.415615	-0.418882	0.224952	-0.267951	-0.00261109	-0.466744	-0.195061	-0.430316	-0.346102	-0.462655	-0.395748	-0.416925	-0.486302	-0.267752	-0.223096	-0.571552	-0.23135	-0.00764834	-0.389679	-0.314144	-0.513608	0.253572	-0.41295	-0.307618	-0.352932	-0.306626	-0.396866	-0.381938	-0.447214	-0.409489	-0.577676	-0.397952	-0.539948	-0.37851	-0.27629	-0.110635	0.147679	-0.37287	-0.336887	-0.277097	-0.326717	-0.296101	-0.315225	-0.458709	-0.323884	-0.422125	-0.255046	-0.221734
cg14409559	0.245153	0.172748	0.10712	0.151219	0.0325015	-0.100488	0.0228791	0.0764165	0.0358356	0.116062	0.0654077	0.168783	0.144914	0.157361	0.200483	-0.0534276	0.117069	0.186784	-0.0613363	0.0830173	0.240371	0.179925	-0.00530535	0.194083	0.134857	0.0370061	0.0680991	-0.00550212	0.0432181	0.0230763	0.0936199	0.138076	0.0689362	0.149214	0.214169	0.268612	0.0947918	-0.00816166	0.105601	0.143489	0.199001	0.0562588	0.0377136	0.235735	0.103781	0.0945854	0.0479815	-0.0891905	0.0425125
cg14546394	-0.0699832	-0.280785	-0.602184	0.324391	-0.375225	0.269369	-0.194084	-0.211665	-0.57981	-0.329017	-0.41994	-0.341194	-0.365887	-0.517414	0.0865595	-0.226344	-0.520642	-0.0529138	0.318788	-0.506341	-0.243454	-0.329721	0.478577	-0.330006	-0.294739	-0.419019	-0.277263	-0.362092	-0.375955	-0.48981	-0.303132	-0.339704	-0.363462	-0.458847	-0.29205	-0.327137	-0.0265124	0.493054	-0.296401	-0.297544	-0.352391	-0.334286	-0.378656	-0.335925	-0.499344	-0.366567	-0.28246	-0.198236	-0.0539392
cg20079899	-0.0339031	-0.042361	0.0056507	-0.0395157	0.186088	0.00539402	0.0485782	0.151376	0.0171011	0.0211842	-0.111366	-0.0364339	-0.0683897	-0.0287101	0.0629094	-0.243247	0.108217	0.21333	0.133138	0.0707382	-0.108962	-0.0612629	0.185505	0.0565506	0.0829907	0.205573	0.330406	-0.0528196	0.0655026	-0.174067	-0.0936926	-0.161723	0.216391	0.125344	0.129836	0.00425688	0.0630549	-0.0441534	0.121562	-0.0842922	-0.0557254	-0.0323597	-0.0821024	0.250147	0.00629952	0.113627	0.00419172	0.315378	0.150189
cg20675505	0.123106	0.326652	0.484858	-0.190211	0.217442	0.0323268	0.255942	0.161504	0.439513	0.309363	0.446334	0.347853	0.444706	0.454548	0.10732	0.244227	0.568267	0.209227	-0.120521	0.33059	0.0172985	0.444926	-0.343417	0.335652	0.210204	0.273632	0.384724	0.258842	0.442116	0.381927	0.3314	0.385152	0.405124	0.58427	0.460081	0.146741	-0.0129952	-0.369234	0.443882	0.269323	0.306332	0.176857	0.186489	0.219371	0.350825	0.279729	0.313877	0.296035	0.100734
cg23710218	0.07914	-0.242876	-0.411329	0.22851	-0.422052	0.0971686	-0.256722	-0.0437931	-0.471825	-0.353493	-0.336801	-0.247535	-0.372342	-0.383689	-0.00338196	-0.0592158	-0.490106	-0.152172	0.255574	-0.295048	-0.0927789	-0.310697	0.301578	-0.328462	-0.188554	-0.371484	-0.374866	-0.311835	-0.338679	-0.38265	-0.241135	-0.239432	-0.345403	-0.470307	-0.25412	-0.0768274	0.0400776	0.320399	-0.334472	-0.244435	-0.185857	-0.195832	-0.352902	-0.214437	-0.374506	-0.249634	-0.289655	-0.375517	-0.145367
cg24142603	-0.129683	-0.378517	-0.58431	0.230672	-0.505791	0.114567	-0.188193	-0.497918	-0.580089	-0.39572	-0.503005	-0.480052	-0.232625	-0.532171	-0.187118	-0.219902	-0.635045	-0.125556	-0.0292013	-0.516957	-0.334552	-0.257903	0.343279	-0.494957	-0.450477	-0.499313	-0.396514	-0.363791	-0.297974	-0.478277	-0.315175	-0.439919	-0.406865	-0.555919	-0.238929	-0.366422	-0.247918	0.185411	-0.409988	-0.461009	-0.362617	-0.435831	-0.484078	-0.453268	-0.837647	-0.356189	-0.268745	-0.444131	-0.0900447
cg24258699	-0.161998	-0.415856	-0.649297	0.371992	-0.426622	0.230083	-0.331266	-0.333899	-0.659489	-0.417662	-0.530083	-0.482981	-0.448204	-0.629486	-0.103821	-0.258247	-0.654112	-0.249944	0.163856	-0.57831	-0.326546	-0.467604	0.396734	-0.480306	-0.399511	-0.501872	-0.38187	-0.469598	-0.480283	-0.523474	-0.40308	-0.454053	-0.458964	-0.623092	-0.430464	-0.372297	-0.138947	0.445048	-0.441844	-0.415855	-0.464042	-0.450619	-0.424259	-0.430996	-0.559443	-0.456333	-0.415028	-0.324658	-0.193771
cg25827490	-0.0278831	-0.250399	-0.443213	0.257707	-0.256557	0.0805843	-0.075562	-0.12196	-0.386969	-0.218227	-0.327573	-0.280223	-0.273601	-0.389849	0.0408447	-0.356474	-0.354671	0.00678394	0.236941	-0.378125	-0.162322	-0.217063	0.239382	-0.184281	-0.291076	-0.280294	-0.119924	-0.259332	-0.303192	-0.401228	-0.19408	-0.159673	-0.232279	-0.289711	-0.239373	-0.227937	-0.0624813	0.283312	-0.250465	-0.238577	-0.257267	-0.25038	-0.26101	-0.179991	-0.306936	-0.234045	-0.205569	-0.11714	-0.0520191
cg25832771	0.338646	0.0308019	0.0545614	0.0248477	0.0170171	-0.0970679	0.158786	0.10064	-0.00601096	0.0879481	0.0646968	-0.0226755	0.0682819	-0.0548577	0.0596015	-0.127504	0.0616605	0.119288	0.0758596	0.0559007	0.00150301	0.0837368	-0.0774047	0.00302814	-0.109496	0.0925169	-0.0652387	0.137831	0.143067	0.0200901	0.168068	0.035509	0.0814083	0.124616	0.0623659	0.0866365	-0.141619	-0.0770424	-0.0616328	-0.0733864	-0.0179758	-0.00384368	0.0403198	0.0767801	0.142868	0.022304	0.0414479	0.0300424	-0.0733605
cg26280666	-0.145552	-0.327078	-0.452749	0.195972	-0.304488	0.106362	-0.322642	-0.0866106	-0.5057	-0.406524	-0.391334	-0.326217	-0.431161	-0.501777	-0.112026	-0.273725	-0.442384	-0.165314	0.166192	-0.383184	-0.244709	-0.443277	0.313651	-0.341741	-0.301917	-0.342617	-0.221854	-0.391939	-0.436135	-0.510765	-0.407495	-0.514966	-0.329062	-0.39677	-0.325358	-0.231318	-0.149487	0.307752	-0.294301	-0.392011	-0.390249	-0.260282	-0.282568	-0.279284	-0.465619	-0.286874	-0.403277	-0.0589821	-0.198213
cg26799209	-0.152644	-0.381571	-0.419238	0.204902	-0.306332	0.00967268	-0.46185	-0.253324	-0.462957	-0.327374	-0.469427	-0.406874	-0.375102	-0.479266	-0.270765	-0.196566	-0.616868	-0.269154	-0.0420658	-0.420527	-0.331766	-0.474385	0.205659	-0.495733	-0.37705	-0.333713	-0.310206	-0.399553	-0.340955	-0.458793	-0.450838	-0.605664	-0.372148	-0.574553	-0.316388	-0.319778	-0.139951	0.0973501	-0.420094	-0.330826	-0.300487	-0.349167	-0.328726	-0.364704	-0.508576	-0.417056	-0.448789	-0.30007	-0.267718
cg26876974	-0.0863772	-0.417791	-0.528999	0.30878	-0.305052	0.0740496	-0.411556	-0.209622	-0.527525	-0.406351	-0.518567	-0.43222	-0.452762	-0.573302	-0.190316	-0.310074	-0.572318	-0.190831	0.0686688	-0.448323	-0.311015	-0.506729	0.327979	-0.42588	-0.360486	-0.408454	-0.287319	-0.413173	-0.446471	-0.534338	-0.41074	-0.55207	-0.412185	-0.558505	-0.387811	-0.317977	-0.151146	0.316977	-0.398503	-0.391483	-0.402418	-0.368998	-0.355568	-0.327007	-0.477543	-0.347697	-0.411129	-0.234208	-0.22577
cg00655982	0.158586	-0.0861766	-0.319866	0.0403879	-0.242237	0.0137831	0.115437	-0.1034	-0.312707	-0.0640934	-0.0739421	-0.0919669	-0.214462	-0.258188	0.163457	-0.165878	-0.0740455	0.2132	0.343485	-0.31363	-0.0858144	-0.017086	0.198993	-0.0176926	-0.133269	-0.287746	-0.0381548	-0.0484386	-0.127725	-0.132573	-0.0358026	-0.000633774	-0.216874	-0.0820826	-0.141449	-0.177287	-0.104312	0.372161	0.0384235	-0.14942	-0.198619	-0.0425106	-0.230968	-0.115824	-0.118378	-0.133033	0.0974138	0.0778815	0.0780898
cg07286881	-0.269651	0.053595	0.241493	-0.194723	0.138777	0.0590209	-0.174747	0.0981707	0.213648	0.0653368	0.0965558	0.0605933	-0.217622	0.157243	-0.108904	0.164426	0.0969565	-0.218463	0.0203537	0.124059	0.00844592	-0.23376	-0.135893	0.114015	0.0789054	0.18084	0.0717959	-0.160432	0.0362429	0.00589413	-0.328887	-0.000522335	-0.00781468	0.00144728	-0.0655198	0.0849327	0.188208	-0.0770423	-0.00489137	0.140472	0.066573	0.0861673	0.0444627	-0.122287	0.0719781	0.0709667	-0.0745946	0.0736186	-0.0402221
cg08359761	-0.0557364	-0.0930638	0.0501767	-0.0975713	0.0456577	0.0736287	0.0353906	0.0151028	0.150837	0.219314	0.0989028	-0.0652873	0.00608467	0.0300074	-0.0104882	0.102704	0.0896749	-0.0219986	0.135468	0.0566499	-0.11116	-0.00590724	0.0464671	0.132575	0.0565305	0.153211	0.0187694	0.0842157	0.125381	0.103974	0.0764445	0.132721	0.146041	0.0452257	-0.059501	-0.0889466	0.125826	-0.177167	0.033323	-0.022725	0.0654506	0.0909652	0.179686	0.0379241	0.0549849	0.221611	0.0967776	-0.00533463	0.199622
cg08633134	0.105998	0.212499	0.358515	-0.141097	0.240169	-0.116937	0.071768	0.191675	0.210711	0.23641	0.293483	0.26413	0.260873	0.256052	0.0729075	0.155213	0.279834	0.137155	-0.0467526	0.186977	0.0901025	0.270419	-0.139427	0.209705	0.143824	0.205113	0.235283	0.0942292	0.441271	0.228695	0.157646	0.110894	0.273835	0.300962	0.208751	0.300978	0.141619	-0.213011	0.226064	0.335467	0.230847	0.0851762	0.0525946	0.286043	0.341696	0.193325	0.139541	0.138588	0.0311846
cg09281364	-0.0531607	-0.00182364	-0.237517	-0.0449453	-0.149409	-0.118036	0.0633956	-0.0742349	-0.256916	-0.0377023	-0.0409462	-0.0828351	-0.192656	-0.138526	0.0390587	-0.336575	-0.0456852	0.0672166	0.254234	-0.229992	-0.0656731	-0.041015	0.0625104	-0.0365696	-0.174944	-0.222075	0.0751057	-0.123654	-0.117275	-0.129234	-0.110587	0.0258649	-0.0989661	-0.0550974	-0.104863	-0.225635	-0.228195	0.185927	0.0166848	-0.151907	-0.248325	0.0309761	-0.169478	-0.111389	0.0287228	-0.157076	-0.0105109	0.192114	0.042382
cg09997788	0.0534012	-0.0331977	0.156785	-0.369474	0.0181224	0.0267069	0.114447	-0.0108018	0.219865	0.139746	0.227092	0.0842697	0.0680356	0.0554586	-0.0270441	0.237315	0.156316	-0.039169	0.0129372	0.0318791	-0.0897615	0.0797327	-0.237938	0.0893474	0.103281	0.228771	0.110456	0.111723	0.210696	0.165357	0.123506	0.156813	0.0965834	0.140115	0.0442323	-0.023336	0.140625	-0.130237	0.160238	0.134906	0.258316	0.047211	-0.00584343	0.148441	0.129568	0.286786	0.164941	0.0374978	0.156599
cg10687087	0.0147491	-0.16437	-0.126963	0.127096	-0.0900015	0.157201	0.0119453	-0.0190708	-0.11431	-0.121516	-0.0790549	-0.244418	-0.0878223	-0.158388	-0.117214	-0.120281	-0.149473	-0.102608	-0.0542249	-0.110096	-0.173832	-0.0862513	0.00923657	-0.101075	-0.204788	-0.103887	-0.316568	0.0227348	-0.0295798	-0.0994392	0.0351249	-0.0371092	-0.119037	-0.186271	-0.200665	-0.0626773	-0.133898	0.0957402	-0.201559	-0.15739	-0.204481	-0.114785	-0.00835249	-0.0112757	-0.0131409	-0.118418	-0.0578067	-0.240535	-0.0429867
cg11430371	0.177822	0.101745	0.0573989	0.0925245	-0.0480624	-0.0128599	0.0976464	0.0839389	0.0144744	0.0765018	0.171982	0.0580328	0.140872	0.102256	0.180519	0.0786671	0.109745	0.10977	-0.0109099	0.0672598	-0.114539	0.0737966	-0.0797552	0.0887805	0.0312197	-0.0215374	-0.0409599	0.103274	0.0307087	0.0924225	0.21061	-0.0281167	0.127984	0.0970652	0.056203	0.0146644	0.009679	-0.143871	0.0945596	0.00662765	0.0400222	0.00914312	0.094463	0.0455008	0.0643665	0.0925146	0.124955	-0.0385577	0.136304
cg14822303	0.15455	-0.172755	-0.363651	0.212106	-0.228742	-0.0033508	-0.138392	-0.281751	-0.331396	-0.124296	-0.292209	-0.243812	-0.129441	-0.242869	-0.00748477	-0.0628335	-0.36574	-0.11548	0.0455629	-0.30891	0.0300504	-0.171346	0.184711	-0.310279	-0.145939	-0.247274	-0.282499	-0.186629	-0.144595	-0.213883	-0.0984867	-0.262752	-0.216326	-0.354493	-0.120736	-0.223711	0.0324626	0.0698391	-0.24102	-0.162941	-0.0788011	-0.283483	-0.301554	-0.171637	-0.332374	-0.152762	-0.145405	-0.327196	-0.0395326
cg15078122	0.0274759	0.250343	0.284705	-0.116378	0.24917	0.0269537	0.127387	0.173338	0.22009	0.441358	0.347155	0.282046	0.120655	0.267785	0.132153	0.122354	0.402421	0.128693	0.225746	0.192218	-0.0751204	0.122112	0.016068	0.297139	0.222095	0.28308	0.292645	0.0542573	0.265111	0.268809	0.0772615	0.0514463	0.22755	0.380751	0.253826	0.107891	0.205215	-0.0908496	0.339785	0.13527	0.173345	0.297966	0.179953	0.128544	0.13646	0.20985	0.197807	0.395193	0.287241
cg15560112	0.028932	-0.120654	0.0145331	0.049432	-0.0572938	-0.0580016	-0.0201474	0.0836835	-0.00131624	-0.0968296	-0.00705419	-0.0974946	-0.11469	-0.0637897	-0.123291	0.0330658	-0.0675319	-0.0462033	0.0596657	0.0158735	0.0441113	-0.0355661	0.0269297	-0.0181833	0.0152999	-0.0233684	-0.0240292	0.119722	-0.0295735	-0.0819833	0.0525409	0.0841524	-0.0881525	-0.0455515	-0.119431	0.0487093	-0.0227436	0.071917	-0.088913	0.0480121	-0.0599832	-0.0300854	0.0758135	-0.0247689	0.0564502	0.0485061	-0.0563128	-0.0569	0.0232609
cg16255631	0.164507	0.193378	0.046614	-0.0237079	-0.0389151	-0.00746606	0.198463	-0.00931916	0.11069	0.253497	0.224496	0.142213	0.22224	0.0939554	0.083513	0.00141305	0.178471	0.160627	0.125308	-0.0161556	-0.0919378	0.284846	0.0285914	0.0883327	0.0488308	0.030959	0.129245	0.070242	0.14683	0.146613	0.148664	0.125237	0.192402	0.242126	0.265118	-0.13863	-0.0201161	-0.11874	0.265181	0.047014	0.0996653	0.0577423	0.0110223	0.0674281	0.0618052	0.150852	0.193837	0.154162	0.111612
cg17071417	0.11155	-0.162359	-0.0384545	-0.104993	-0.0945542	0.0109293	0.121345	-0.0532654	0.0224185	-0.0118204	0.129285	-0.105391	0.088768	-0.0642123	0.0976181	0.148601	-0.0311439	-0.00603432	0.0520011	-0.161025	-0.111098	0.0207072	-0.0912442	0.0254018	-0.00419475	-0.0113304	-0.17069	0.110338	-0.0112476	-0.0388383	0.221759	0.0769797	0.0415297	0.0011367	-0.101838	-0.0795238	-0.0736189	-0.125638	-0.0507446	0.00937295	-0.0286771	-0.0981376	0.0719438	0.157054	-0.0720063	0.134759	0.0552189	-0.126102	0.113465
cg17871610	-0.0442243	-0.0861519	-0.193553	-0.0372531	-0.177539	-0.114794	0.115317	-0.145483	-0.247397	0.0511898	-0.0215781	-0.0988093	-0.175186	-0.240341	0.055455	-0.226901	-0.0720935	0.0662246	0.179954	-0.222874	-0.119473	-0.00189363	0.0480073	-0.0366388	-0.175709	-0.184336	-0.0307347	-0.0660556	-0.0719668	-0.114187	-0.0731918	0.0392776	-0.112506	-0.0804822	-0.164354	-0.192579	-0.202769	0.182421	-0.0318272	-0.0926824	-0.272047	0.0386983	-0.159276	-0.135618	-0.0821602	-0.151954	0.0167333	0.0775551	-0.00541734
cg18559348	0.234283	0.00491379	-0.260611	0.0272449	-0.239965	-0.0241612	0.145744	-0.0695816	-0.279896	-0.0435845	0.00239448	-0.0155047	-0.126126	-0.148234	0.238411	-0.0487258	-0.0159887	0.279403	0.366781	-0.277854	-0.0174222	0.0862718	0.198878	0.0556952	-0.113928	-0.292731	-0.0551588	0.0215407	-0.0471521	-0.0491857	0.0423376	0.0646238	-0.115295	-0.00090898	-0.0372837	-0.136631	-0.0688062	0.335003	0.0833238	-0.0725366	-0.165825	-0.0210601	-0.236702	-0.0150148	-0.054234	-0.0822369	0.175594	0.0144377	0.0861161
cg19756497	0.159093	-0.157999	-0.087679	-0.149347	-0.0795554	-0.148647	0.141301	0.051043	0.0304352	-0.155428	-0.0450662	-0.107786	0.000692235	-0.100805	-0.0295286	-0.157664	0.0791491	0.153202	0.0534481	-0.0402785	-0.126	0.0640636	-0.114913	-0.0387417	-0.134675	-0.0233414	0.0415642	0.166774	-0.00982626	0.0123324	0.117232	0.158115	0.0295407	0.0960933	-0.13135	-0.0588682	-0.228585	0.0318637	-0.0410136	-0.248924	-0.177562	-0.132585	-0.0694138	0.0344504	9.50796e-05	0.064599	0.196443	0.159951	0.0373817
cg22196260	0.263555	0.137462	0.0329237	-0.0548542	-0.103486	-0.028816	0.12166	0.0843119	-0.0273465	0.156637	0.184867	0.116197	0.0634222	0.0947945	0.214289	-0.0357814	0.196466	0.3261	0.225239	-0.0425825	-0.0759329	0.121745	0.0330897	0.165619	0.0694906	-0.0941704	0.087914	0.00548548	0.122734	0.178231	0.155841	0.0286075	0.00071998	0.201531	0.159822	-0.0248845	-0.0191973	-0.0794578	0.196233	0.00439534	0.181287	0.0905344	-0.077433	0.0324688	0.137578	0.116568	0.174871	0.103053	0.136574
cg22603562	0.0284915	0.0981995	0.146638	-0.236255	0.156097	0.0139067	0.343008	0.101748	0.312499	0.22476	0.234438	0.120681	0.233344	0.121937	0.0921928	0.0864331	0.218392	0.114972	0.0598044	0.0879083	0.0260028	0.23025	-0.226959	0.163905	0.0790541	0.171256	0.10988	0.296077	0.239522	0.191108	0.287952	0.298782	0.143813	0.236917	0.129597	0.0280462	-0.0705783	-0.0940379	0.128802	0.107881	0.0787847	0.144741	0.237913	0.187582	0.218072	0.150158	0.201544	0.167528	0.144619
cg22652782	0.423144	0.462417	0.359766	-0.105457	0.130425	-0.0519116	0.228761	0.2716	0.170072	0.307154	0.324156	0.440604	0.425696	0.392834	0.453543	0.2847	0.348368	0.370418	0.0822789	0.208809	0.176966	0.492421	-0.167453	0.251478	0.241322	0.161713	0.125341	0.276067	0.44455	0.324459	0.413757	0.116567	0.278957	0.432105	0.545532	0.286065	0.120023	-0.178965	0.312891	0.219057	0.372448	0.174259	0.044336	0.356521	0.29716	0.0740004	0.238485	0.0489068	0.0360691
cg01291939	0.0340428	0.198799	0.267276	-0.11927	0.212516	0.033943	0.222701	0.166149	0.215646	0.330248	0.258834	0.214565	0.177681	0.246865	0.0956287	0.103694	0.242078	0.163626	0.106487	0.211591	0.165656	0.201448	-0.19188	0.229042	0.190716	0.179604	0.168377	0.227378	0.237273	0.27296	0.174697	0.146424	0.202867	0.290663	0.276804	0.113075	0.0770359	-0.134643	0.221863	0.212065	0.240507	0.265726	0.145783	0.172583	0.12713	0.0284816	0.1742	0.164517	0.0474971
cg02192974	0.17866	0.173641	0.239785	-0.309474	0.157004	0.00204624	0.246727	0.146229	0.315354	0.279701	0.279284	0.213521	0.185643	0.364963	0.104397	0.201284	0.274045	0.214027	0.0013045	0.160449	0.172016	0.15783	-0.171305	0.273425	0.261747	0.184351	0.0234295	0.253902	0.317221	0.223942	0.160816	0.0741233	0.183523	0.241064	0.244798	0.137262	0.173706	-0.403359	0.197977	0.246249	0.355506	0.154995	0.131443	0.171263	0.126568	0.239634	0.242095	0.00342054	0.205862
cg03182113	-0.0251702	-0.237455	-0.325523	0.320112	-0.377443	-0.0321169	-0.179213	-0.176878	-0.398873	-0.481777	-0.310059	-0.257668	-0.207182	-0.315582	-0.159681	-0.190168	-0.308706	-0.173249	-0.166934	-0.27318	-0.104134	-0.145973	0.196853	-0.2537	-0.199542	-0.331775	-0.191289	-0.261552	-0.307007	-0.240832	-0.132773	-0.140013	-0.212877	-0.234722	-0.251275	-0.0825285	-0.1924	0.132835	-0.181284	-0.299485	-0.307063	-0.279424	-0.248153	-0.119751	-0.274247	-0.186818	-0.217162	-0.26237	-0.125886
cg03344031	0.0185727	-0.189721	-0.130348	0.130066	-0.31036	0.0219645	-0.205741	-0.0890981	-0.261446	-0.320505	-0.193566	-0.212208	-0.261554	-0.219685	-0.13529	0.0197679	-0.220265	-0.179276	-0.0565255	-0.211256	-0.0484933	-0.196233	0.0999793	-0.204583	-0.080347	-0.203124	-0.167584	-0.263795	-0.22039	-0.202365	-0.205156	-0.209297	-0.285704	-0.221071	-0.252396	0.043697	0.00563946	0.0188964	-0.133653	-0.151247	-0.0943342	-0.20427	-0.167485	-0.156665	-0.218403	-0.0635376	-0.17096	-0.197319	-0.100923
cg05220442	0.228688	0.402223	0.402686	-0.196201	0.311669	-0.145672	0.416094	0.183826	0.451954	0.40317	0.486727	0.44298	0.486351	0.544901	0.199222	0.307329	0.560221	0.390647	0.0162067	0.338554	0.144549	0.483336	-0.206769	0.429855	0.418981	0.333887	0.280748	0.386316	0.437862	0.565061	0.41078	0.347348	0.466432	0.651636	0.47282	0.203467	0.13678	-0.48972	0.477748	0.279654	0.408433	0.262061	0.298074	0.314029	0.291131	0.332348	0.450912	0.266038	0.274503
cg06182329	0.058112	-0.257524	-0.365219	0.219312	-0.426517	0.0113109	-0.0904007	-0.217443	-0.391105	-0.422412	-0.268035	-0.254365	-0.267019	-0.345505	-0.106869	0.00119482	-0.350068	-0.155695	0.0212749	-0.357583	-0.0810104	-0.17942	0.276158	-0.267688	-0.0739682	-0.296895	-0.245809	-0.241352	-0.284427	-0.227896	-0.158318	-0.0970422	-0.291038	-0.352543	-0.283033	-0.13144	-0.00948472	0.148088	-0.146911	-0.246472	-0.191922	-0.31339	-0.299083	-0.148825	-0.270624	-0.142287	-0.177574	-0.3289	-0.0545483
cg06553312	0.0301061	-0.216498	-0.312601	0.201129	-0.402212	0.0719082	-0.148778	-0.178207	-0.406734	-0.47957	-0.261774	-0.253967	-0.220949	-0.307012	-0.164745	-0.0536368	-0.326222	-0.235854	-0.110384	-0.318011	-0.0625067	-0.203396	0.153137	-0.286956	-0.148888	-0.284873	-0.229378	-0.246477	-0.298657	-0.255369	-0.188655	-0.217921	-0.244906	-0.310008	-0.229176	-0.132194	-0.0952051	0.0772355	-0.166747	-0.242512	-0.277068	-0.293768	-0.275623	-0.198075	-0.308985	-0.175511	-0.188977	-0.299313	-0.152575
cg06579024	0.0504567	0.146579	0.252437	-0.049404	0.217588	0.0163598	0.220861	0.103882	0.213035	0.429857	0.228467	0.164436	0.157838	0.207261	0.0737688	0.197517	0.216401	0.117473	0.0984871	0.176947	0.133904	0.169465	-0.132682	0.19157	0.178493	0.172427	0.139641	0.218364	0.229699	0.246529	0.160625	0.142527	0.189255	0.252394	0.215376	0.0895379	0.21059	-0.290728	0.208838	0.264694	0.235196	0.1959	0.121198	0.175542	0.116505	0.0776112	0.177324	0.138478	0.103709
cg07636552	0.0911148	0.243432	0.413794	-0.164424	0.322822	0.0346051	0.252534	0.181028	0.431038	0.516582	0.357451	0.263085	0.243467	0.331998	0.0778017	0.266701	0.397286	0.156695	0.0459085	0.318026	0.148976	0.266937	-0.256307	0.335529	0.250157	0.324993	0.252061	0.301188	0.33762	0.280682	0.192483	0.25256	0.289553	0.402141	0.309154	0.173095	0.317404	-0.45161	0.335733	0.394067	0.324295	0.299279	0.247211	0.288956	0.237975	0.254474	0.260798	0.230423	0.138833
cg08155908	0.0965826	0.328741	0.433235	-0.189493	0.363839	0.0039611	0.328858	0.221736	0.470209	0.621006	0.440542	0.389592	0.309498	0.444809	0.140371	0.328446	0.441129	0.2795	0.0596792	0.328006	0.206035	0.32651	-0.250924	0.370137	0.380095	0.403158	0.279375	0.326862	0.385735	0.412246	0.245316	0.271364	0.355045	0.451797	0.403808	0.214027	0.398484	-0.390605	0.361527	0.458669	0.467713	0.372055	0.251088	0.308319	0.281853	0.268897	0.33272	0.230137	0.180822
cg08183141	-0.0309075	-0.260955	-0.355122	0.230359	-0.431902	0.0705669	-0.134238	-0.167309	-0.421099	-0.533491	-0.274509	-0.284736	-0.248885	-0.39442	-0.153679	-0.150516	-0.352477	-0.279473	-0.0720485	-0.348895	-0.164434	-0.201372	0.156242	-0.338883	-0.21269	-0.318757	-0.24489	-0.332431	-0.399992	-0.344989	-0.216188	-0.165846	-0.271243	-0.337457	-0.317376	-0.129501	-0.242252	0.173198	-0.194091	-0.32041	-0.373396	-0.283407	-0.261486	-0.228916	-0.328282	-0.129371	-0.265972	-0.238067	-0.14933
cg08691842	0.164896	0.280824	0.358139	-0.291559	0.39062	0.01909	0.280391	0.266801	0.430481	0.406509	0.348644	0.324787	0.29467	0.363686	0.149842	0.247143	0.416591	0.245907	0.191555	0.347248	0.206594	0.329534	-0.183059	0.349045	0.255584	0.303108	0.243949	0.385214	0.340879	0.279719	0.238797	0.262421	0.367976	0.395772	0.310235	0.22645	0.309209	-0.317574	0.338107	0.331104	0.297662	0.285072	0.288371	0.340367	0.288132	0.296459	0.311518	0.260431	0.210658
cg10270037	0.0880795	0.201066	0.365284	-0.143317	0.313837	0.0356772	0.23183	0.143893	0.343404	0.520184	0.350638	0.213412	0.22386	0.289222	0.0643989	0.199148	0.315484	0.165656	0.0662254	0.296795	0.112311	0.224787	-0.215847	0.287439	0.207408	0.266146	0.212407	0.260343	0.346328	0.321616	0.20711	0.194739	0.274865	0.350327	0.286328	0.12342	0.202983	-0.309686	0.273994	0.314663	0.299678	0.30156	0.204593	0.266516	0.19242	0.164627	0.235513	0.180619	0.143541
cg10592766	0.102846	0.380125	0.481059	-0.344254	0.426596	-0.0700921	0.42867	0.222695	0.572916	0.630811	0.452977	0.422141	0.391219	0.489574	0.191939	0.362906	0.550469	0.323583	0.12036	0.364525	0.239367	0.413915	-0.242227	0.428576	0.358288	0.44779	0.327526	0.41747	0.47637	0.432871	0.334189	0.38071	0.397291	0.551259	0.437186	0.245903	0.343112	-0.452542	0.427362	0.429946	0.459687	0.363616	0.306599	0.369098	0.331152	0.343208	0.400047	0.329083	0.242113
cg10639981	0.0786571	0.152352	0.191524	-0.267114	0.177099	-0.0504626	0.171257	0.328521	0.19113	0.187201	0.333238	0.19687	0.212564	0.186433	0.135321	0.157768	0.238195	0.286725	0.1768	0.303022	-0.00483458	0.252247	-0.0983641	0.164837	0.198645	0.126195	0.151653	0.269548	0.107759	0.204096	0.176798	0.178402	0.365639	0.360616	0.285876	0.095143	0.0215842	-0.299013	0.253755	0.145955	0.152088	0.21658	0.229689	0.267972	0.165522	0.190096	0.0793821	0.0962247	0.125756
cg11558731	-0.0163175	-0.153989	-0.245818	0.101403	-0.164927	0.0182275	-0.124742	-0.117939	-0.257209	-0.281447	-0.228909	-0.178227	-0.155071	-0.208896	-0.162794	-0.0290842	-0.190884	-0.149814	-0.109482	-0.172252	0.00156784	-0.156323	0.190874	-0.170709	-0.0883894	-0.138822	-0.109898	-0.19801	-0.199585	-0.144531	-0.183527	-0.129177	-0.0979922	-0.167187	-0.154953	-0.116415	0.0123227	-0.0079665	-0.0796558	-0.124616	-0.194797	-0.298231	-0.237593	-0.184546	-0.22462	0.0341554	-0.0369796	-0.11602	0.040238
cg11992783	0.0988726	0.21207	0.406121	-0.375594	0.258702	-0.0981726	0.320633	0.184914	0.437377	0.421646	0.335181	0.233878	0.198864	0.406275	0.051211	0.213033	0.387694	0.192104	0.0187931	0.280127	0.18007	0.193273	-0.295299	0.337605	0.321967	0.329591	0.184973	0.279205	0.353985	0.29295	0.171452	0.196443	0.253302	0.322277	0.278608	0.20673	0.28663	-0.525756	0.237998	0.360695	0.405674	0.233629	0.21927	0.275704	0.249787	0.307952	0.235712	0.148771	0.172708
cg11995228	0.166356	0.266651	0.497864	-0.360947	0.404034	-0.409435	0.302204	0.212736	0.521349	0.654102	0.500994	0.412311	0.356605	0.481608	0.140654	0.394572	0.513456	0.294978	0.0804121	0.397856	0.129882	0.346524	-0.217429	0.396482	0.459368	0.467444	0.317908	0.375064	0.471931	0.525409	0.357108	0.303724	0.397543	0.541386	0.417318	0.170109	0.352156	-0.676857	0.456385	0.428331	0.532425	0.392156	0.315041	0.292138	0.301982	0.394707	0.376449	0.271983	0.315037
cg12588014	0.0499861	0.299479	0.527961	-0.389064	0.244491	-0.019432	0.317636	0.285577	0.494325	0.480478	0.435396	0.350418	0.296516	0.415462	0.120241	0.30585	0.470876	0.201475	0.0853064	0.395109	0.198952	0.30715	-0.288523	0.372186	0.330494	0.409302	0.290597	0.328569	0.424112	0.366652	0.249856	0.321019	0.332327	0.470954	0.371326	0.28247	0.188432	-0.426142	0.333259	0.359301	0.39698	0.370776	0.253513	0.297689	0.304307	0.319747	0.27767	0.263275	0.123515
cg14106680	0.026225	-0.0253009	0.0125674	-0.493921	-0.0388056	0.00682163	0.0939549	0.0202714	0.0342976	0.0529904	0.0284372	-0.0139535	0.00577664	0.016201	0.127171	0.0591601	0.0713796	0.062803	0.166865	-0.0629087	-0.0946822	-0.0533304	-0.162961	0.0991984	0.0529138	0.0264961	-0.0436568	-0.0435858	0.00845642	-0.0317928	-0.0592668	-0.0668906	0.00919074	0.00861042	0.0315554	-0.000549033	0.136429	-0.0887664	0.0595416	0.0440842	0.115679	0.0177712	-0.0394828	0.0613218	-0.061143	0.0573768	0.0271033	0.0558448	0.0800047
cg17383272	0.141201	0.236666	0.272338	-0.143682	0.327978	-0.0840801	0.0660686	0.0918392	0.260172	0.669328	0.312628	0.206883	0.194278	0.289812	0.101849	0.145581	0.287733	0.165398	0.2101	0.240063	-0.0107806	0.215545	-0.120959	0.215961	0.147381	0.268991	0.22301	0.120213	0.411894	0.354603	0.161356	0.117879	0.276212	0.343896	0.313874	0.010101	0.185883	-0.301627	0.244218	0.232653	0.293076	0.30041	0.172297	0.0685467	0.212845	0.171443	0.213487	0.219788	0.230908
cg17889586	0.00965755	0.328441	0.372073	-0.192422	0.493049	0.0615291	0.228824	0.1914	0.44573	0.433314	0.305992	0.305993	0.339029	0.479693	0.0598704	0.0615751	0.467095	0.185351	-0.101915	0.39463	0.225175	0.293676	-0.310861	0.350874	0.217408	0.330451	0.376392	0.377938	0.350907	0.394036	0.263514	0.243604	0.429646	0.464933	0.305414	0.0822264	0.04393	-0.277076	0.314986	0.333756	0.204761	0.287188	0.366208	0.216153	0.360692	0.232076	0.357502	0.352839	0.202504
cg19601653	0.0861265	0.179741	0.285282	-0.0489827	0.257168	-0.0380587	0.215221	0.0825672	0.280791	0.555902	0.284581	0.183555	0.174657	0.235236	0.0687572	0.209688	0.259463	0.13554	0.10468	0.207171	0.12172	0.189454	-0.131812	0.226465	0.162772	0.220219	0.164755	0.207192	0.264139	0.275701	0.171171	0.187708	0.206051	0.296385	0.2498	0.113714	0.293022	-0.366473	0.224705	0.279907	0.280683	0.216842	0.151597	0.203068	0.160674	0.173433	0.191718	0.147218	0.183298
cg20117799	0.0600117	0.264325	0.457719	-0.217843	0.307613	-0.0379098	0.303825	0.132343	0.449657	0.577745	0.417703	0.269849	0.272271	0.399367	0.0432071	0.211772	0.423701	0.211944	-0.0185755	0.352302	0.182926	0.287587	-0.325879	0.370041	0.247568	0.298872	0.27173	0.333151	0.366999	0.383117	0.254097	0.260739	0.309988	0.4423	0.357563	0.160801	0.262575	-0.488715	0.302532	0.377376	0.38505	0.314212	0.255925	0.297122	0.219797	0.264493	0.279937	0.232312	0.153704
cg20837681	-0.125038	-0.020923	-0.0604157	0.0329496	-0.0668844	0.0881034	0.121159	-0.20579	-0.00763978	0.0536606	0.0267575	-0.0493191	-0.0184964	-0.100853	-0.0452417	-0.0327583	-0.0495133	-0.0261246	0.0287821	-0.16149	0.128526	0.0632797	-0.0458831	-0.11237	-0.0795644	0.0415079	0.0697085	-3.86628e-05	-0.038922	-0.0152264	0.0320625	0.0818609	-0.0686378	-0.0486648	0.0169987	-0.130429	-0.0836643	0.0494761	-0.0850473	-0.131293	-0.0629455	-0.0420309	0.041625	0.0714271	-0.197985	-0.0124509	-0.0644252	-0.00105658	0.0118441
cg21755725	0.254602	0.500253	0.636658	-0.258893	0.466955	-0.0638543	0.187922	0.531165	0.492901	0.474833	0.51782	0.566344	0.383871	0.614613	0.303688	0.220718	0.609682	0.429258	-0.064763	0.608937	0.324397	0.339664	-0.202683	0.562079	0.420073	0.485086	0.319727	0.492066	0.51272	0.438393	0.261038	0.0786969	0.490328	0.622959	0.496384	0.411332	0.283098	-0.332812	0.475224	0.451188	0.460937	0.36284	0.333971	0.331973	0.509795	0.221828	0.38122	0.285556	0.136204
cg22217660	0.0838478	0.149664	0.393003	-0.0460885	0.273197	0.0485646	0.297369	0.0611986	0.391838	0.583754	0.372241	0.245109	0.244086	0.270473	0.0904638	0.352484	0.359739	0.211698	0.0537235	0.24478	0.0190262	0.251656	-0.0985005	0.295867	0.287163	0.297519	0.195755	0.205856	0.333638	0.381338	0.239103	0.232151	0.28286	0.375728	0.249625	0.188619	0.268391	-0.348844	0.29928	0.254057	0.354945	0.252085	0.17381	0.265718	0.0578779	0.282699	0.26112	0.171297	0.244645
cg22891278	0.0728874	0.144394	0.214022	-0.0333937	0.201507	-0.0200007	0.198721	0.0624484	0.24391	0.492609	0.215041	0.139676	0.137107	0.18653	0.0818281	0.228314	0.209506	0.133123	0.127467	0.158335	0.110445	0.149239	-0.0641252	0.18386	0.165416	0.186096	0.143567	0.191314	0.213997	0.211457	0.140145	0.178354	0.169591	0.23427	0.184149	0.0859811	0.312759	-0.365372	0.175532	0.263301	0.237537	0.174876	0.133482	0.174447	0.126389	0.175798	0.154975	0.126527	0.191398
cg23268322	0.0226206	0.142615	0.0690717	-0.0149656	-0.00262161	-0.0704966	0.105676	0.144401	0.0454778	0.0615689	0.0656695	0.0836756	0.0142936	0.114903	0.0581132	0.00852187	0.0839565	0.0497929	0.0707741	0.0754708	0.275774	-0.0629926	0.0448685	0.0451728	0.113734	0.00128787	-0.113058	0.0241569	-0.0681839	0.0468892	0.023751	-0.0963198	0.0250573	0.0568585	0.14628	0.133941	0.0745255	-0.0595594	0.0509627	0.0788761	0.0281017	0.205702	-0.00133302	0.066878	0.0919013	0.0779656	0.0292569	0.105328	-0.0484207
cg24871540	0.251073	0.44816	0.62961	-0.256703	0.409462	-0.0833019	0.16198	0.495544	0.474699	0.451199	0.50418	0.51876	0.379055	0.568429	0.25002	0.230651	0.559774	0.382584	-0.113583	0.579055	0.286443	0.319585	-0.250598	0.525225	0.386609	0.438296	0.25898	0.472196	0.450278	0.4386	0.284291	0.100326	0.443637	0.565273	0.445925	0.381922	0.228093	-0.310275	0.408414	0.41756	0.457974	0.324842	0.34581	0.286647	0.536286	0.185057	0.358902	0.225741	0.0804923
cg25311666	0.00511137	-0.175058	-0.188464	0.289555	-0.244198	0.060418	-0.137991	-0.0548506	-0.275776	-0.30826	-0.174817	-0.152919	-0.175555	-0.246501	-0.142058	-0.0824025	-0.181894	-0.176059	-0.112475	-0.180548	-0.141773	-0.17048	0.190439	-0.168551	-0.0434543	-0.150786	-0.117804	-0.240756	-0.1846	-0.167886	-0.208747	-0.17943	-0.140578	-0.150569	-0.187285	-0.0469718	0.000106192	-0.00559852	-0.0276889	-0.157852	-0.238705	-0.177545	-0.181526	-0.125522	-0.187186	-0.113526	-0.153432	-0.164004	-0.0817666
cg25474703	0.0539778	0.119338	0.394537	-0.104973	0.174941	0.0224638	0.181738	0.0840652	0.288296	0.394782	0.293094	0.145932	0.0823918	0.243648	-0.020867	0.269481	0.258309	0.0678304	0.0366853	0.23777	0.177115	0.156477	-0.247721	0.200191	0.175322	0.236445	0.138165	0.262389	0.300951	0.273753	0.159558	0.110968	0.213472	0.237121	0.203857	0.160556	0.0908125	-0.288734	0.132292	0.226897	0.254292	0.157225	0.150898	0.160892	0.160989	0.141115	0.140211	0.178291	-0.0227816
cg26163880	0.0552905	-0.319832	-0.26667	0.242106	-0.228703	-0.0181865	0.0776314	-0.225826	-0.147671	-0.249458	-0.173945	-0.20934	-0.0926535	-0.197218	-0.137859	-0.0789259	-0.171402	-0.0433846	-0.132982	-0.26551	-0.140732	-0.0455728	0.215781	-0.146746	-0.0484886	-0.223941	-0.147285	-0.104229	-0.0704025	-0.139117	-0.0050043	-0.0106399	-0.0931182	-0.172536	-0.250969	-0.170785	-0.0495758	0.0848921	-0.0774037	-0.108116	-0.0883547	-0.275614	-0.223604	-0.10509	-0.115983	0.106649	0.0405477	-0.173479	0.0820132
cg26707398	-0.0846758	0.0343813	0.109156	0.00537819	0.160271	-0.146495	0.136671	-0.0138503	0.214382	0.291574	0.0778133	0.0384219	0.0273265	0.0805872	-0.0819625	0.0949925	0.0445217	-0.0257627	-0.0487286	0.176014	0.0498792	0.0160587	-0.0391297	0.0203813	0.106803	0.12344	0.0114794	0.146896	0.00739402	0.182886	0.032061	0.0715506	0.0573303	0.0403842	-0.0437359	0.0534173	0.179055	-0.184066	0.0273567	0.141589	0.144147	0.227929	0.156978	0.0928849	0.108668	0.109784	0.0663923	0.104829	0.134444
cg00401761	0.10842	0.108467	0.238144	-0.0403737	0.154786	-0.0501578	0.0597983	-0.0460538	0.300912	0.16127	0.176637	0.1312	0.0945374	0.236394	0.0785941	0.226169	0.230164	-0.00709563	-0.0742634	0.158346	0.118468	0.115468	-0.156518	0.230629	0.130665	0.187184	0.0945062	0.182152	0.134888	0.133857	0.159105	0.143618	0.15361	0.227296	0.0800429	0.0495273	0.146643	-0.305994	0.12959	0.136983	0.221167	0.0461468	0.245295	0.171958	0.16146	0.14026	0.121401	0.119866	0.075186
cg00778928	0.188352	0.307792	0.592707	-0.386862	0.348636	-0.133493	0.271067	0.247441	0.604829	0.434145	0.516241	0.433857	0.361934	0.477599	0.179519	0.344753	0.602025	0.277664	0.0833361	0.414368	0.125676	0.452802	-0.387872	0.456369	0.31701	0.500168	0.350986	0.426616	0.424463	0.400796	0.373911	0.371335	0.438859	0.606845	0.373481	0.275987	0.217816	-0.460005	0.455274	0.396339	0.47662	0.309171	0.394327	0.406464	0.425524	0.418985	0.404085	0.350633	0.155125
cg01243465	0.0751659	-0.302754	-0.367469	0.0846861	0.00572099	0.108241	-0.118507	-0.339795	-0.115095	-0.076551	-0.155187	-0.295808	0.0310901	-0.155789	-0.178605	-0.0881413	-0.170536	-0.0939912	0.10148	-0.291244	-0.31159	-0.0371891	0.0977266	-0.261814	-0.186839	-0.0441233	-0.048766	0.0973575	-0.0776116	0.0293782	0.145988	-0.119495	0.0922577	-0.143759	-0.168542	-0.665852	-0.256695	-0.036486	-0.119736	-0.243999	-0.177226	-0.278428	0.119953	-0.328444	-0.0975425	-0.0594087	0.0598724	-0.041457	0.11089
cg01577298	0.227815	0.19237	0.133974	-0.332671	0.144282	-0.28873	0.09392	0.173295	0.109815	0.234127	0.249989	0.232327	0.17236	0.232298	0.123557	0.151438	0.148459	0.22172	0.154576	0.158322	0.119418	0.209915	-0.113535	0.183636	0.250047	0.184074	0.061793	0.107668	0.253388	0.245533	0.187201	0.0319232	0.0785848	0.200366	0.227563	0.128709	0.152519	-0.112614	0.195934	0.153553	0.300896	0.218548	0.123824	0.178467	0.183405	0.159795	0.192171	0.111555	0.18821
cg01837630	0.056885	0.141965	0.268535	-0.17102	0.112602	0.0863309	0.11874	0.201015	0.260378	0.229755	0.241668	0.132116	0.030254	0.192403	-0.0133432	0.040677	0.315324	0.148288	0.204502	0.134921	0.0425644	0.145156	-0.12587	0.198123	0.0647002	0.276257	0.230106	0.215423	0.23236	0.188145	0.112723	0.142492	0.195132	0.269379	0.0475999	0.0434249	0.0144448	-0.047764	0.124548	0.141948	0.0322084	0.153762	0.157858	0.133543	0.218021	0.114538	0.19835	0.331405	0.0494426
cg01966334	0.112755	0.23573	0.513293	-0.304442	0.335212	-0.130548	0.324058	0.134928	0.576112	0.446178	0.420459	0.362709	0.319234	0.423149	0.129705	0.345841	0.517978	0.225009	-0.0110709	0.337412	0.142614	0.362066	-0.312961	0.394312	0.319663	0.421232	0.329536	0.440209	0.370835	0.352456	0.335142	0.317785	0.318402	0.483788	0.324152	0.20374	0.292553	-0.553548	0.395027	0.408133	0.453912	0.267461	0.330456	0.337905	0.29639	0.387483	0.354656	0.285964	0.177557
cg04882584	0.132361	-0.0054648	0.137219	-0.176403	0.227799	-0.0263245	0.159152	-0.0788569	0.225898	0.343997	0.225944	0.0814544	0.286979	0.1816	0.0243093	0.287564	0.212246	0.107935	-0.0249672	0.0868198	-0.157331	0.172278	-0.120267	0.0506113	0.13345	0.180914	0.00264332	0.269857	0.245616	0.340026	0.293961	0.0133665	0.268283	0.205978	0.144901	-0.178424	0.0416552	-0.399907	0.193341	0.096949	0.18351	0.0279038	0.151267	-0.0253187	0.0872315	0.196137	0.266179	0.0617943	0.234902
cg06197616	-0.0013337	0.020835	0.0704359	-0.0927385	0.0877755	-0.0906975	0.0903602	-0.177108	0.0622914	0.174554	0.0529127	-0.0468579	0.259806	0.0719352	-0.109726	0.0379479	0.0283365	-0.0460649	-0.156251	0.0321922	-0.228252	0.142494	-0.195698	-0.0839962	-0.180928	0.0414667	0.0034468	0.202815	0.219886	0.193084	0.164844	0.0127477	0.10072	0.105869	0.0873737	-0.249341	-0.207679	-0.213569	-0.00900286	0.00373131	-0.011898	0.0313585	0.0469541	-0.198691	-0.0397962	-0.102244	0.136953	0.0254646	0.0448665
cg07163991	0.145417	0.121065	0.269577	0.0050502	0.143398	-0.0495694	0.240704	-0.0128813	0.320886	0.387701	0.274627	0.208787	0.221888	0.232372	0.132259	0.32063	0.31477	0.155345	0.0831996	0.15386	0.0938109	0.255165	0.0307033	0.207791	0.268524	0.301148	0.206351	0.260467	0.203791	0.258015	0.259373	0.222659	0.237301	0.318986	0.223109	0.0524024	0.327415	-0.492326	0.301145	0.244092	0.352194	0.0969392	0.208251	0.188496	0.112502	0.266238	0.230184	0.159487	0.201796
cg07949777	0.0943739	-0.102834	0.00985924	-0.00240802	-0.0488304	-0.0149865	0.107903	-0.0167882	0.0322473	0.0608315	0.0759569	-0.0758212	0.10194	-0.0540895	0.102838	0.0394688	0.0168978	-0.108328	-0.0618034	0.0243787	0.0193561	-0.027837	-0.181209	-0.0779953	-0.117018	-0.053702	-0.154546	0.116156	-0.126492	-0.0830275	0.117782	-0.12705	0.187034	0.0269502	0.0937371	-0.0931418	-0.0963108	-0.100167	-0.0417103	-0.00210846	0.00904198	-0.05573	-0.0157728	0.0764812	0.0371781	0.0880432	-0.0263102	-0.0240351	-0.120872
cg09273212	-0.038417	-0.186969	-0.183437	0.157286	-0.164332	-0.0864576	0.0820653	-0.15948	-0.111018	-0.13528	-0.144642	-0.215617	-0.125978	-0.13734	-0.0651771	-0.198232	-0.15131	-0.100694	-0.0423205	-0.205597	0.0100914	-0.106173	-0.00487233	-0.106667	-0.178213	-0.205564	-0.0602352	-0.0757167	-0.170817	-0.187054	-0.0343971	-0.00754535	-0.0845695	-0.158544	-0.182857	-0.138689	-0.0713556	0.0672023	-0.193055	-0.0593538	-0.160547	-0.0698041	-0.166645	0.0298208	-0.00365694	0.042728	-0.114754	-0.117025	-0.0696577
cg09681043	0.110962	0.15719	0.147172	-0.0958608	0.15136	0.0868177	0.154935	-0.00103454	0.184053	0.194567	0.168848	0.149909	0.197673	0.248021	0.14169	-0.0203812	0.260205	0.319833	-0.0330277	0.0780058	-0.114364	0.239182	-0.0685026	0.25527	0.0832303	0.12055	0.283831	0.159958	0.165496	0.15229	0.196669	0.16635	0.0998672	0.221579	0.221421	-0.0017448	-0.0523914	-0.216201	0.241853	0.126507	0.225714	0.0759869	0.142956	0.132855	0.0412675	0.169878	0.238926	0.0430786	0.182407
cg11732925	0.0533793	0.143906	0.265013	-0.26538	0.208091	-0.243611	0.242798	-0.0297467	0.284477	0.257267	0.277789	0.170459	0.288426	0.292218	0.0212973	0.171617	0.27633	0.185799	-0.0584568	0.147582	-0.0101282	0.318617	-0.132034	0.187082	0.189599	0.227023	0.230712	0.292459	0.357097	0.361864	0.348537	0.254774	0.103406	0.245105	0.210397	0.0320392	0.0644195	-0.359183	0.251073	0.231773	0.252835	0.174088	0.211955	0.135797	0.113245	0.252602	0.29623	0.116714	0.278318
cg11983405	0.0565122	0.0858217	0.117509	-0.117283	0.0387827	-0.0173208	0.146398	-0.0686836	0.103252	0.100447	0.0643068	0.044226	0.219896	0.0596846	0.0144233	0.10936	0.131406	-0.00841909	-0.107035	0.121011	-0.070916	0.15	-0.184943	0.0238908	-0.0664517	0.0891576	0.0642886	0.100104	0.159701	0.0885394	0.155978	0.0896429	0.0481056	0.139885	0.19864	0.0201867	-0.0412868	-0.199967	0.0612934	-0.0285945	0.115136	0.0769995	0.0721501	0.0787582	-0.0563549	-0.00186182	0.0280209	0.0156624	-0.0700292
cg13525231	0.0157698	-0.0757798	0.0349671	-0.00910822	0.11278	-0.107294	-0.0358648	-0.22444	0.16482	0.192088	0.0225211	-0.051478	0.0819344	0.073235	-0.0981602	0.0828298	0.0808019	-0.0641708	-0.100857	0.0338198	-0.000533752	0.0492612	-0.109408	-0.0549897	-0.0179632	0.126009	0.0514427	0.27348	0.0878836	0.184621	0.149786	0.00161539	0.0928789	0.0421226	0.0321631	-0.331352	-0.0797695	-0.320938	-0.020598	-0.0248576	0.0523679	-0.0408352	0.191154	-0.147357	0.0156958	0.00559147	0.108399	0.0532741	0.0209136
cg15551687	0.022167	-0.0523653	-0.0494629	0.077708	0.0810861	-0.127069	0.0802459	-0.0543055	0.0469515	0.0348775	-0.114176	-0.084609	-0.0247503	0.0492827	-0.136671	-0.0723991	0.0172457	0.0104959	-0.0750723	0.0224448	0.0565902	0.0230882	0.0339022	-0.023166	-0.00622238	0.0340553	0.0992588	0.0806071	0.095782	0.0824552	0.0591711	0.0610714	0.130272	0.0127532	-0.12017	-0.103151	-0.0636315	-0.146231	-0.0586015	0.0172646	-0.0727139	0.00894258	-0.0176135	0.0825839	0.109217	0.0662605	0.0478396	0.0858721	0.0838062
cg16089796	0.0847779	0.282986	0.521927	-0.254325	0.294863	-0.100065	0.265328	0.186781	0.495105	0.3732	0.399049	0.355712	0.382298	0.454912	0.100971	0.293469	0.504744	0.186466	-0.179381	0.420657	0.105276	0.371265	-0.348531	0.381484	0.264616	0.341728	0.268186	0.414911	0.427052	0.391018	0.324844	0.250285	0.349087	0.506055	0.299911	0.22124	0.0965542	-0.466776	0.357983	0.317238	0.348219	0.286552	0.290402	0.237827	0.304994	0.258351	0.338592	0.237505	0.148441
cg16122707	-0.0584928	0.219176	0.374699	-0.207036	0.372561	-0.064189	0.268154	0.0913113	0.489768	0.385511	0.279913	0.28731	0.297719	0.365721	0.168318	0.156563	0.401287	0.190203	-0.0838769	0.324135	0.123712	0.262599	-0.259266	0.320533	0.167467	0.337739	0.273003	0.376148	0.301944	0.304147	0.27978	0.252445	0.30676	0.388305	0.219624	0.118889	0.0538271	-0.229921	0.189995	0.243433	0.251559	0.251344	0.322486	0.253674	0.241532	0.219484	0.271712	0.290193	0.124451
cg16258545	0.0420052	-0.433655	-0.476254	0.169672	-0.249579	0.108407	-0.0369097	-0.498384	-0.349454	-0.244097	-0.307959	-0.46078	-0.0345806	-0.417513	-0.205365	-0.167885	-0.402605	-0.153313	-0.11316	-0.554846	-0.510613	-0.213448	0.184376	-0.445905	-0.395279	-0.374157	-0.273657	-0.0996064	-0.148027	-0.210029	-0.00992475	-0.342259	-0.272112	-0.377202	-0.223407	-0.613792	-0.371451	0.148495	-0.272074	-0.337795	-0.305365	-0.481241	-0.349297	-0.363371	-0.346989	-0.184775	-0.105235	-0.188199	-0.00346213
cg20147515	-0.0582415	0.0530919	0.138485	-0.0389684	-0.00103089	0.033945	0.0886755	-0.0806402	0.164088	0.106784	0.0830748	0.0889873	0.0943266	0.116137	-0.0845556	0.21518	0.069014	-0.0531366	-0.0358688	0.0660516	0.0354109	0.080303	-0.0865519	0.0438027	0.0863257	0.0854651	0.0290185	0.170087	0.0576959	0.128961	0.16627	0.0902379	-0.0177537	0.0195886	0.0944857	-0.0230941	0.0498369	-0.0979066	0.0323821	0.0516924	0.162239	0.142903	0.145518	0.0633999	0.0485583	0.0850413	0.0614205	-0.00735123	-0.0291988
cg20679271	0.0368763	-0.0784538	0.0349372	0.108079	-0.00644999	0.00134145	-0.0437917	-0.0700471	0.0694563	0.0131504	0.00719577	0.0154967	-0.0271209	-0.0186197	-0.0952154	0.028956	0.0363348	-0.141163	-0.127413	0.0423154	0.00868983	-0.0505451	0.0491952	-0.0468845	0.117107	0.168633	-0.0301503	-0.0974627	-0.0265424	0.0679726	-0.0597312	-0.114875	0.180306	-0.0370685	-0.11759	0.0233161	0.0611064	0.0820795	0.0152411	-0.0431364	0.0273928	-0.0731387	-0.0131109	0.0732848	0.0212246	0.171902	0.0730689	0.080068	0.00696031
cg21512773	0.0558516	0.221021	0.224631	-0.0776148	0.096788	0.0131498	0.147117	-0.0799017	0.258456	0.101206	0.100175	0.169289	0.184524	0.268603	0.122508	0.133223	0.194443	0.0829071	-0.230421	0.105832	0.168319	0.224505	-0.193314	0.154483	0.0805687	0.141875	0.246102	0.272895	0.19792	0.115694	0.168364	0.170893	0.0231631	0.16119	0.217134	0.0288284	-0.00926154	-0.231957	0.118434	0.217563	0.198396	0.0323663	0.116809	0.112218	0.0335124	0.136786	0.156749	0.100973	0.0690243
cg22529396	0.00269092	0.13852	0.24191	-0.122667	0.17364	-0.0376253	0.201738	-0.038565	0.313171	0.246298	0.146876	0.136343	0.218499	0.279492	-0.0564119	0.147002	0.268092	0.0655877	-0.148104	0.129379	-0.0208391	0.216951	-0.175994	0.153004	0.133724	0.199482	0.199221	0.210799	0.255438	0.300432	0.202503	0.194113	0.152382	0.264619	0.147586	-0.012612	0.025836	-0.371229	0.173188	0.131524	0.223765	0.17032	0.120424	0.0916812	0.102703	0.194171	0.243833	0.175331	0.166128
cg22903402	0.0340839	0.273113	0.476387	-0.212611	0.418082	-0.0493698	0.260246	0.141377	0.555576	0.451082	0.375405	0.364445	0.35954	0.454612	0.124204	0.273638	0.497845	0.19627	-0.0583138	0.379658	0.168158	0.371698	-0.290784	0.390454	0.291061	0.363372	0.318912	0.376956	0.44553	0.381066	0.345055	0.298894	0.365342	0.490088	0.318678	0.214321	0.168954	-0.378239	0.313677	0.359743	0.373729	0.290385	0.347345	0.337239	0.334909	0.31671	0.321715	0.296797	0.167952
cg23898305	0.0691173	0.0599024	0.2204	-0.0105274	0.166375	-0.200408	0.200002	-0.0801452	0.281721	0.140859	0.179225	0.0890586	0.183276	0.19151	-0.147027	0.0800722	0.259934	-0.0617474	-0.244755	0.176262	0.0461934	0.195589	-0.16223	0.0798995	0.0479555	0.219766	0.120171	0.224923	0.192567	0.255337	0.199853	0.18689	0.199824	0.212816	0.058832	0.0279262	-0.0629649	-0.387625	0.128789	0.0376325	0.0657615	0.0602928	0.170684	0.143824	0.184323	0.182371	0.16101	0.117208	0.0113188
cg24225455	-0.150749	0.0748999	0.12965	-0.179201	0.142462	-0.170976	0.125899	0.0461863	0.152813	0.111018	0.0431394	0.0877498	0.102569	0.139694	0.0140114	0.0528187	0.186935	0.0778139	0.0441384	0.188783	0.0570518	0.1589	-0.117236	0.0205665	0.0350314	0.211544	0.275248	0.171063	0.210684	0.00250007	0.048547	0.129275	0.111732	0.183473	0.131813	0.0231193	-0.0206217	-0.187407	0.055855	0.109787	0.0833064	0.192264	0.105064	0.089305	-0.00861032	0.0658021	0.0666844	0.278661	0.081129
cg24882192	-0.0519897	-0.175932	-0.216875	0.207126	-0.00628831	-0.0348949	0.177737	-0.0819605	-0.108838	-0.0978788	-0.192913	-0.178548	-0.075068	-0.164703	-0.0151807	-0.267386	-0.0612356	0.029038	-0.0310761	-0.123286	0.0811781	-0.0467563	0.09456	-0.0440161	-0.129259	-0.0719047	0.0491356	0.0118543	-0.127374	-0.186342	0.0296948	0.0358147	0.0409949	-0.060466	-0.172973	-0.104971	-0.105084	0.143907	-0.123852	-0.0928602	-0.247131	-0.116022	-0.0877718	0.0541947	-0.0430145	-0.0288089	-0.0117377	0.055755	0.0521356
cg24996605	0.0811592	0.0753093	0.175207	-0.0519099	0.206214	-0.0498032	0.256173	-0.0161008	0.291039	0.354826	0.20817	0.144231	0.2774	0.142172	0.101433	0.232411	0.265687	0.159358	0.0338642	0.175096	0.117005	0.263371	-0.0199293	0.183343	0.126751	0.287318	0.0734453	0.335165	0.138755	0.23001	0.320065	0.175978	0.272258	0.270605	0.159967	0.0181035	0.110027	-0.318832	0.172546	0.126454	0.214877	0.0723364	0.327982	0.182904	0.118924	0.152255	0.182219	0.140448	0.113156
cg25314706	-0.00627212	0.176205	0.141509	0.0191269	0.0972148	-0.10305	0.271702	0.0204551	0.186024	0.317401	0.17551	0.193804	0.210289	0.243124	0.151584	0.156124	0.171748	0.157709	0.0263885	0.128427	0.159593	0.211971	-0.0335105	0.194926	0.140222	0.0166095	0.0145752	0.235689	0.192762	0.267261	0.253701	0.1661	0.15844	0.197361	0.166379	0.0441055	0.166475	-0.213984	0.13098	0.212411	0.215172	0.246246	0.0423825	0.113532	0.107977	0.122936	0.215456	0.00996667	0.0598882
cg26650973	0.0190137	0.23237	0.316368	-0.13461	0.198813	-0.141963	0.29746	-0.0469864	0.393056	0.320026	0.271684	0.292146	0.249986	0.325088	0.143775	0.283273	0.37376	0.191132	-0.0656564	0.199133	0.176738	0.382161	-0.187207	0.243917	0.280608	0.247405	0.273819	0.307504	0.287595	0.345634	0.29882	0.370746	0.173728	0.328917	0.20915	0.133373	0.0847287	-0.331923	0.262066	0.265726	0.296499	0.24859	0.246649	0.206792	0.166745	0.237658	0.286625	0.183166	0.101271
cg04887076	-0.468382	-0.109964	0.0340951	0.00159491	0.118378	0.0650775	0.071125	0.0885156	0.13449	0.00227056	-0.0417013	-0.0205958	0.00967957	-0.0224976	-0.0974101	-0.0117769	0.0589049	-0.0659379	-0.159898	0.0580673	-0.00733171	-0.0626553	-0.131742	-0.0219332	-0.0226967	0.135823	0.202242	0.0447261	-0.198127	-0.00951426	-0.051278	0.15091	0.0411521	0.0172087	-0.122791	-0.0336632	0.0277124	-0.0902704	-0.00875506	-0.0050468	0.0475491	-0.0833746	0.210854	-0.0583214	0.0644075	0.0807137	-0.101782	0.0868514	-0.0504597
cg06607594	0.209878	0.30953	0.497781	-0.189958	0.16489	0.0171122	0.28717	0.16746	0.357111	0.468454	0.48423	0.362518	0.214207	0.350485	0.224445	0.320678	0.483827	0.313485	0.110911	0.292276	0.129906	0.304418	-0.187027	0.423151	0.320321	0.279729	0.192982	0.277395	0.354608	0.370903	0.211838	0.219759	0.270538	0.520191	0.379852	0.332812	0.262427	-0.337856	0.368191	0.338157	0.3916	0.312455	0.223977	0.35799	0.207624	0.252625	0.258894	0.180061	0.116792
cg10968958	0.272397	-0.0775406	0.0703001	-0.202255	0.0323389	-0.0785807	0.189228	0.00830182	0.106673	0.183543	0.102543	-0.0301308	0.106856	-0.0209921	0.0902873	0.161126	0.0480453	0.0194242	0.156603	0.00934439	-0.0126203	0.0268414	-0.230887	-0.0476279	0.0188636	-0.0183573	-0.177784	0.217705	0.102733	0.0741943	0.238033	-0.0662367	0.0945948	0.0641883	0.0880134	-0.0399212	0.0855401	-0.276354	0.0189628	0.0189897	0.0895754	0.0596291	0.0683891	0.181671	0.00487673	0.0286276	0.060112	-0.00731117	0.0356434
cg13425888	-0.261403	-0.124462	-0.202579	0.138471	0.00640329	0.0456423	0.115106	-0.17894	-0.107928	-0.0722593	-0.14391	-0.128409	0.217549	-0.0573558	-0.0925297	-0.0014842	-0.0859781	-0.0843832	-0.174217	-0.124623	-0.155238	0.0653499	0.186404	-0.182621	0.00208156	-0.0855075	-0.00364031	-0.0300265	-0.0852593	0.0549583	0.00781259	0.0605108	0.0336883	-0.0461716	-0.0597904	-0.194463	0.0428184	-0.127587	-0.013417	-0.00702376	-0.0704335	-0.217882	-0.024756	-0.150564	-0.187441	0.0714014	0.0321879	-0.0611117	0.155669
cg15031253	-0.362747	-0.262325	-0.254496	0.143421	-0.088292	0.148913	-0.03089	-0.152757	-0.140708	-0.130509	-0.228107	-0.222498	0.112055	-0.180924	-0.156421	-0.021307	-0.178512	-0.174958	-0.226946	-0.164445	-0.238281	-0.0920074	0.109142	-0.241257	-0.139955	-0.221557	-0.0733173	-0.113708	-0.227615	-0.0721166	-0.0683639	-0.0956258	-0.0369399	-0.160536	-0.129901	-0.258011	-0.127693	-0.0125176	-0.120346	-0.134002	-0.144325	-0.259618	-0.0334473	-0.262999	-0.207549	-0.0515204	-0.109039	-0.1105	-0.0414065
cg17817203	0.30129	0.0553164	0.330547	-0.0810463	0.158712	0.00425245	0.242243	0.114551	0.367032	0.236899	0.348986	0.156631	0.214645	0.197778	-0.0694744	0.146113	0.392991	0.132828	-0.00302841	0.17318	0.0600166	0.209134	-0.134974	0.184624	0.166412	0.158629	0.237902	0.21998	0.199539	0.204519	0.35506	0.134649	0.334529	0.387406	0.244175	0.150469	0.115361	-0.227636	0.282011	0.183391	0.260889	0.132551	0.171	0.501378	0.275693	0.418415	0.207597	0.232866	0.135093
cg18059223	0.0706387	-0.00496573	0.173628	-0.193034	0.125823	0.0552822	0.158021	-0.00887418	0.229449	0.299483	0.157119	0.159176	0.183408	0.130615	0.087886	0.287787	0.166593	0.205672	0.0977379	0.159052	0.0505646	0.166386	0.0162452	0.159907	0.255392	0.153293	0.0472382	0.174181	0.192517	0.182601	0.197958	0.0815114	0.173543	0.198428	0.17666	0.127499	0.340263	-0.331589	0.179229	0.205572	0.330846	0.0979206	0.166769	0.1709	-0.0966512	0.21695	0.147091	0.0319607	0.215732
cg22475082	0.115202	-0.0289735	-0.00670989	0.0906644	0.121206	-0.0131554	-0.00119889	-0.0404384	0.0917554	0.0145882	-0.0176404	-0.100532	0.0760436	0.106932	-0.202884	-0.0357516	0.0351916	-0.136557	-0.163352	0.0450652	-0.157386	0.0381587	-0.0229659	-0.0618892	0.00321342	0.0818205	-0.104833	0.0911815	0.10266	0.15768	0.0842879	-0.00612839	0.103593	0.0245995	-0.081987	-0.133334	-0.0712165	-0.201886	-0.046777	-0.0576158	-0.0296043	-0.0417227	0.0881819	-0.0526876	0.0924774	0.124951	0.0546035	-0.0825084	0.0897122
cg24040502	-0.616769	-0.155196	-0.0704793	0.0228588	-0.00172966	0.0310848	0.00568174	0.00936818	0.00330348	-0.137651	-0.195657	-0.0908992	-0.0446939	-0.114284	-0.136605	-0.01855	-0.0757001	-0.167962	-0.231155	-0.0161052	-0.0250698	-0.119844	-0.0460281	-0.126946	-0.108058	-0.030277	0.140442	-0.0805806	-0.264661	-0.108603	-0.174876	0.0816162	-0.0892006	-0.101939	-0.185059	-0.0208617	-0.0392	0.00609491	-0.10181	-0.0636385	-0.104293	-0.127433	0.0340337	-0.124976	-0.122453	-0.002692	-0.15546	0.0303507	-0.103348
cg24307499	0.36641	0.134912	0.324434	-0.283226	0.348649	-0.123005	0.338563	0.21255	0.453862	0.422882	0.512756	0.287332	0.350116	0.319808	0.202929	0.22882	0.496733	0.359428	0.135895	0.257362	0.0311713	0.316035	-0.155983	0.372851	0.34642	0.352632	0.228735	0.359017	0.369468	0.354856	0.471544	0.216512	0.396365	0.508012	0.343278	0.141509	0.186937	-0.338829	0.40059	0.224456	0.398446	0.182473	0.328765	0.438766	0.329365	0.488339	0.39348	0.248797	0.364858
cg24348448	0.205659	0.0750211	0.374329	-0.0755351	0.0985232	0.0245458	0.181193	0.0705818	0.293467	0.301868	0.341656	0.133332	0.179678	0.193071	0.0258619	0.243508	0.317859	0.133016	-0.0358722	0.210094	0.119189	0.244831	-0.194965	0.298659	0.114645	0.188187	0.0919806	0.292841	0.277259	0.161319	0.311553	0.129515	0.265408	0.330101	0.19604	0.184651	0.00583092	-0.246526	0.180886	0.145558	0.231362	0.120262	0.212269	0.21863	0.129647	0.18545	0.192156	0.0957952	0.0167605
cg25651476	-0.577901	-0.11891	-0.0227348	0.0363004	0.0320465	0.0656456	0.053261	0.0156177	0.0275531	-0.119571	-0.163638	-0.074991	0.0132152	-0.0632814	-0.163615	-0.013996	-0.0358734	-0.155728	-0.2809	0.00821577	-0.0168125	-0.072021	-0.0955864	-0.124934	-0.110339	0.016924	0.189786	-0.0315703	-0.214805	-0.0730113	-0.125105	0.0866992	-0.0512412	-0.0552932	-0.13536	-0.0250745	-0.0532883	-0.0178461	-0.0699364	-0.023748	-0.0754276	-0.121996	0.0378938	-0.0613201	-0.090466	0.0176823	-0.118136	0.0501555	-0.0944911
cg26489750	0.467295	0.114142	0.194583	-0.16096	0.12804	-0.0726448	0.121778	-0.0094804	0.268028	0.207622	0.214805	0.125137	0.391523	0.305081	-0.0129759	0.248715	0.310565	0.324799	0.0440347	0.0390758	-0.159042	0.299623	-0.0312878	0.277254	0.224608	0.17966	0.076906	0.311751	0.380797	0.310907	0.403247	0.126757	0.307531	0.343049	0.306139	-0.0825882	0.0442017	-0.409721	0.29505	0.204934	0.230057	-0.0261908	0.16801	0.153066	0.140812	0.211685	0.410993	-0.0651651	0.227234
cg27099991	0.137779	0.0497944	0.411225	-0.242836	0.209336	-0.106358	0.172203	0.0496553	0.422393	0.477552	0.443225	0.199514	0.189855	0.205882	-0.0652734	0.210843	0.36033	0.0849102	-0.0180747	0.227289	-0.00742808	0.199951	-0.299112	0.304721	0.155748	0.301849	0.166673	0.166229	0.234483	0.331079	0.27858	0.207705	0.217948	0.358121	0.174635	0.157956	0.16363	-0.309574	0.254573	0.163537	0.365843	0.240692	0.26014	0.3013	0.150496	0.38921	0.208309	0.131786	0.18069
cg01274907	0.0677932	0.339905	0.629181	-0.406923	0.23082	-0.221442	0.218398	0.364886	0.504218	0.53204	0.537624	0.38779	0.0632686	0.427648	0.252212	0.279565	0.544255	0.297418	0.194511	0.439048	0.280695	0.238983	-0.37383	0.438413	0.375403	0.358322	0.373763	0.211289	0.302871	0.289987	0.133136	0.358247	0.277162	0.539695	0.325219	0.455928	0.241058	-0.363086	0.318163	0.361403	0.424233	0.451458	0.273902	0.527839	0.424819	0.346985	0.142893	0.357013	0.120305
cg01964358	0.00194003	0.128278	0.329197	0.0107358	0.302514	-0.0587528	0.0363884	0.277477	0.34366	0.215919	0.199366	0.227648	0.119207	0.221857	0.0574467	-0.011366	0.362494	0.0656282	-0.13636	0.25947	0.0707792	0.0724836	-0.163997	0.262618	0.134283	0.266747	0.332525	0.128574	0.13157	0.128392	0.0990794	-0.00142005	0.2127	0.343373	0.145199	0.208169	0.0584906	-0.168667	0.227981	0.0448969	0.178343	0.213366	0.259655	0.282556	0.320257	0.209142	0.0959824	0.279596	0.0524258
cg05941060	-0.0335785	0.230004	0.370196	-0.0368052	0.311567	-0.0466077	0.0228277	0.431688	0.256125	0.178021	0.215811	0.264678	0.0122565	0.27066	-0.0588583	-2.63735e-05	0.367459	0.128886	-0.0400074	0.348113	0.278057	0.0604829	-0.0310801	0.226115	0.237181	0.317362	0.367656	0.0878915	0.166279	0.199684	-0.0182566	0.00676709	0.278799	0.325737	0.155131	0.383761	0.172142	-0.168585	0.274839	0.125205	0.11315	0.264079	0.157175	0.497922	0.350266	0.183023	0.0895881	0.394755	0.184947
cg06330901	-0.0489713	0.135526	0.395304	-0.143664	0.309725	-0.158047	0.00545163	0.374642	0.327495	0.111385	0.25038	0.270856	0.0804411	0.275731	-0.167883	0.0105903	0.384912	0.106434	-0.106692	0.366141	0.169177	0.0857732	-0.165408	0.253019	0.213401	0.333394	0.319988	0.121152	0.107488	0.270967	0.0408181	0.0972611	0.315762	0.408962	0.125181	0.338499	0.0627264	-0.196988	0.295731	0.0343187	0.148788	0.175763	0.262489	0.43032	0.329392	0.26085	0.128061	0.413885	0.184967
cg06928634	0.0431542	0.202119	0.315255	0.0596079	0.216205	0.0190212	0.0710514	0.186186	0.307601	0.246441	0.321468	0.310542	0.0747448	0.327611	0.0954548	0.115929	0.395592	0.218075	0.0664773	0.180545	0.169304	0.179457	0.052413	0.271968	0.282415	0.286875	0.388402	0.132204	0.273384	0.167802	0.114765	0.0453737	0.179704	0.368665	0.289981	0.189815	0.214619	-0.167632	0.354597	0.18544	0.312954	0.196387	0.182406	0.273744	0.241735	0.204801	0.20803	0.232028	0.180587
cg07141885	0.0898967	0.184395	0.128808	0.0118348	0.183305	0.039215	0.272606	0.0576365	0.250501	0.204211	0.341231	0.275886	0.223329	0.304274	0.0898536	0.161258	0.297363	0.301909	-0.018704	0.0957679	0.0949133	0.282478	-0.0367895	0.299994	0.259883	0.0458401	0.189095	0.151845	0.145059	0.370404	0.274227	0.389549	0.35306	0.311533	0.220577	0.0274405	0.0813562	-0.10348	0.353669	0.20373	0.142254	0.196647	0.12332	0.433737	0.260996	0.295846	0.343133	0.0656775	0.206286
cg08348949	-0.0515855	0.229703	0.381458	-0.082953	0.333001	0.0263371	0.2419	0.318732	0.413859	0.256789	0.372483	0.36088	0.192703	0.342137	-0.0568332	0.074807	0.429928	0.189398	-0.0874967	0.308182	0.196743	0.242604	-0.154882	0.313631	0.357208	0.349306	0.406621	0.14031	0.244302	0.161307	0.119666	0.158815	0.420175	0.3959	0.263959	0.294288	0.227449	-0.218406	0.418429	0.299138	0.266835	0.212584	0.231154	0.560073	0.35725	0.358426	0.2206	0.294614	0.239985
cg09975352	-0.0237149	0.302533	0.307145	-0.261919	0.310244	-0.123582	0.152114	0.329882	0.304563	0.375413	0.380898	0.323726	0.111449	0.311796	0.0888757	0.135735	0.34998	0.191227	0.135111	0.270921	0.211638	0.21098	-0.110978	0.182841	0.293687	0.327983	0.331369	0.104568	0.331296	0.221142	0.0599522	0.161364	0.387005	0.352377	0.239497	0.223465	0.174027	-0.140557	0.302277	0.263352	0.229149	0.365696	0.144579	0.457868	0.336696	0.274596	0.187964	0.316501	0.220291
cg25142947	0.202452	0.284442	0.421407	-0.143975	0.293891	0.0695788	0.163738	0.226935	0.338247	0.360614	0.433951	0.394625	0.327226	0.410468	0.0326508	0.264529	0.457083	0.24276	0.0255687	0.253271	0.137334	0.32531	-0.0985692	0.320031	0.291777	0.275632	0.233396	0.19018	0.39506	0.381354	0.178437	0.11967	0.333787	0.479974	0.390594	0.247787	0.273033	-0.22986	0.470228	0.295319	0.324888	0.192811	0.100026	0.310378	0.318706	0.274762	0.361414	0.241556	0.219175
cg25360147	0.0782629	0.0424854	0.18766	-0.110528	0.181486	-0.0373173	-0.0385596	0.182268	0.205948	0.136103	0.20134	0.10351	0.0435622	0.169545	0.0232484	-0.0918662	0.210722	0.217009	0.0835927	0.234707	-0.00656901	0.0498204	-0.059321	0.12211	0.143878	0.286273	0.308403	0.121174	0.0911225	0.0895666	0.0593796	-0.057265	0.28288	0.226497	0.197302	0.0926745	-0.021758	-0.160435	0.228024	-0.0744084	0.113239	0.109002	0.178986	0.339961	0.100012	0.164231	0.120662	0.229697	0.184981
cg26991571	0.0653435	0.16883	0.220926	-0.167195	0.262681	-0.0231485	0.146696	0.252038	0.226221	0.0417671	0.204039	0.210259	0.125578	0.216474	-0.118079	-0.0415783	0.296183	0.10078	-0.128442	0.245152	0.276185	0.14928	-0.0882393	0.201485	0.200058	0.223393	0.137006	0.153191	0.0481424	0.157412	0.0794574	0.0438097	0.3025	0.307974	0.122777	0.248975	0.0464715	-0.154283	0.269211	0.131529	0.109285	0.152928	0.28324	0.36979	0.261196	0.199433	0.138748	0.238804	0.141667
cg27614485	0.0804563	0.247288	0.541304	-0.265753	0.390703	-0.224893	0.147941	0.367999	0.537332	0.371922	0.437706	0.370537	0.16164	0.440071	0.0312393	0.168315	0.573734	0.293792	0.0456582	0.390467	0.225104	0.242526	-0.18474	0.414781	0.443529	0.43087	0.457655	0.247122	0.287131	0.395534	0.204115	0.245443	0.411503	0.551166	0.279259	0.333967	0.234674	-0.493798	0.45557	0.309546	0.364913	0.311156	0.357702	0.57655	0.460973	0.377894	0.288321	0.423456	0.230396
cg00428193	0.053593	0.10028	0.349339	-0.021432	0.049523	-0.000435333	0.15761	0.017237	0.310589	0.249976	0.255133	0.151591	0.0296282	0.242578	-0.0153062	0.313164	0.252104	0.0447722	-0.0100748	0.206841	0.202994	0.127692	-0.132317	0.192861	0.199255	0.20691	0.065744	0.211678	0.246393	0.240286	0.157061	0.0847127	0.141403	0.225438	0.159037	0.22379	0.144787	-0.309135	0.0971953	0.187656	0.294115	0.119901	0.161942	0.13513	0.12047	0.280685	0.102982	0.161069	0.031122
cg01054891	-0.0304671	0.106423	0.209907	-0.0828184	-0.0403719	-0.27708	-0.116893	0.096746	0.0839943	0.159144	0.0987239	0.094928	-0.0900154	0.0465585	0.143008	0.0502092	0.0866035	0.0562089	0.0781046	0.041993	0.0115337	-0.0722747	-0.227497	0.111459	-0.0266505	-0.0235756	0.0793622	-0.0629552	-0.108087	0.0781221	-0.0669962	0.00788516	-0.0591188	0.0801962	0.0922416	0.0912401	-0.0292584	-0.120913	-0.0205359	-0.0750926	-0.0020867	0.161984	0.0829873	0.138973	0.0321368	-0.0884953	-0.13359	0.0114156	-0.194801
cg01656470	-0.0194821	-0.215636	0.0515731	-0.0504887	0.0111926	-0.0515179	-0.156723	-6.13068e-05	0.0749609	0.0590054	-0.0361019	-0.0863304	-0.0621576	-0.0465276	-0.172745	0.0916233	-0.0815804	-0.137199	-0.0676079	0.0063902	-0.0830701	-0.126161	-0.113635	-0.0732324	-0.0589088	-0.0289349	-0.0910599	-0.07594	-0.174348	-0.0594298	-0.0297705	-0.00142069	0.0435631	-0.0779864	-0.111931	-0.0480029	-0.024903	-0.134036	-0.11765	0.0848608	0.0157542	-0.014416	0.0377553	0.053383	-0.0827666	0.0379667	-0.0821339	-0.158016	-0.110709
cg02793099	-0.0980688	-0.169506	-0.244199	0.288388	-0.196102	-0.0734086	-0.159896	-0.149935	-0.253184	-0.332564	-0.301508	-0.291873	-0.221809	-0.105081	-0.18215	-0.22679	-0.29609	-0.260479	-0.167419	-0.159339	0.0681129	-0.223093	0.178812	-0.250432	-0.128315	-0.208137	-0.16908	-0.113351	-0.214889	-0.23989	-0.16099	-0.103977	-0.188827	-0.320093	-0.281537	-0.142871	-0.127032	0.104665	-0.288759	-0.115502	-0.259412	-0.196372	-0.143463	-0.184864	-0.0806614	-0.121276	-0.151623	-0.159709	-0.0310304
cg06652523	-0.130766	0.12836	0.162173	-0.160019	-0.0476635	-0.184194	-0.0456806	0.0452448	0.06093	0.109219	0.160916	0.110045	-0.0165707	0.0431311	0.19089	0.0397936	0.134995	0.0260461	0.113232	0.0678796	-0.00551303	-0.00391086	-0.176268	-0.00307477	0.0121814	0.0913181	0.153821	-0.065379	-0.0263501	0.0549427	-0.0609816	0.00534426	0.0901971	0.116473	0.111734	0.0136349	-0.0955765	0.00367983	0.069698	-0.0190242	0.0057561	0.0930985	0.0537678	0.0292457	0.104698	-0.0503339	-0.107094	0.194939	-0.138015
cg07310951	-2.06745e-05	0.11278	0.213362	0.0365951	0.205021	-0.113917	0.15686	-0.0235948	0.278203	0.27954	0.22852	0.178123	0.183106	0.285678	-0.0402479	0.077797	0.237961	0.129276	-0.103042	0.17295	0.106507	0.157598	0.0851946	0.258999	0.209101	0.227452	0.197004	0.118706	0.265325	0.278592	0.0928056	0.195528	0.174017	0.26383	0.176209	0.167202	0.233661	-0.282046	0.264622	0.222977	0.288605	0.187671	0.177061	0.237385	0.115618	0.288981	0.189943	0.0911579	0.247432
cg08155759	0.0824733	0.267263	0.525203	-0.207365	0.343188	-0.223687	0.367125	0.204904	0.499059	0.495693	0.429357	0.332927	0.315439	0.385938	0.0633829	0.305054	0.520849	0.260151	-0.0686853	0.382752	0.171654	0.345235	-0.251236	0.388475	0.338453	0.409918	0.323554	0.300201	0.356655	0.405254	0.318951	0.302934	0.344844	0.523884	0.297825	0.333552	0.26165	-0.541862	0.389252	0.346601	0.431393	0.294345	0.342142	0.401795	0.29691	0.320442	0.257127	0.323331	0.18646
cg12032885	0.0752998	0.0787033	0.211844	-0.119181	0.022699	0.0893802	0.197735	0.0260358	0.213717	0.237772	0.283788	0.0787329	0.264158	0.21677	0.0272241	0.132594	0.213102	0.128126	0.00736406	0.126288	-0.23273	0.229083	-0.21415	0.211893	0.110017	0.113759	0.00127828	0.194913	0.218506	0.222397	0.264954	0.184401	0.173184	0.222602	0.174578	0.0198199	-0.0122818	-0.235538	0.177003	0.170766	0.173266	0.222666	0.202366	0.139117	0.129554	0.156562	0.186619	-0.112748	0.0438317
cg13374648	0.152825	0.266564	0.209805	-0.170275	0.126031	0.109889	0.0158468	0.144811	0.2009	0.235515	0.243249	0.291212	0.13996	0.245255	0.195235	0.228318	0.244661	0.26462	0.249994	0.0926055	0.131212	0.15478	-0.0432612	0.262625	0.260214	0.0789788	0.156452	0.0714408	0.153243	0.188012	0.0515122	0.0194192	0.204715	0.220169	0.36792	0.100203	0.185132	-0.167362	0.28179	0.226073	0.252331	0.180407	0.129002	0.201489	0.131972	0.0753056	0.105176	0.12797	-0.0039171
cg13946792	0.170463	0.29257	0.478873	-0.205951	0.346503	0.0110778	0.320825	0.245482	0.506293	0.454654	0.428186	0.361473	0.277316	0.433682	0.139624	0.320428	0.488573	0.218688	0.081123	0.363166	0.253987	0.335695	-0.252454	0.395242	0.337011	0.37438	0.283583	0.374396	0.333488	0.383386	0.274656	0.314651	0.33127	0.499276	0.346332	0.284908	0.35371	-0.442041	0.394495	0.396897	0.460805	0.278452	0.30837	0.385301	0.313888	0.362661	0.296954	0.275044	0.182794
cg15415893	0.0239628	0.15816	0.385372	-0.0598506	0.267019	-0.0345508	0.240844	0.0751893	0.359887	0.376806	0.279367	0.243378	0.280257	0.331053	0.00769409	0.20691	0.341765	0.12529	-0.131413	0.311359	0.110053	0.258354	-0.191993	0.286534	0.25156	0.288393	0.259753	0.324354	0.314725	0.33786	0.205504	0.223001	0.288826	0.364117	0.273314	0.155633	0.142744	-0.420091	0.267971	0.299801	0.313629	0.195978	0.24844	0.203161	0.13887	0.191175	0.222054	0.15221	0.083225
cg15473155	-0.0404015	-0.272166	-0.125155	0.0579137	-0.231636	0.0586277	-0.196408	-0.127182	-0.162995	-0.294669	-0.265804	-0.338306	-0.352528	-0.217521	-0.20134	0.0246588	-0.315208	-0.368941	-0.15124	-0.176614	0.152709	-0.346127	-0.0739306	-0.295694	-0.117943	-0.261449	-0.338342	-0.0492165	-0.285879	-0.22796	-0.159602	-0.274471	-0.310164	-0.378992	-0.338396	-0.0904016	-0.189523	0.0290704	-0.405515	-0.111911	-0.196578	-0.152319	-0.0733567	-0.238492	-0.147214	-0.17767	-0.328992	-0.185641	-0.264474
cg15678121	0.163104	0.265472	0.284687	-0.134303	0.0337245	-0.00692172	0.0538351	0.268957	0.195047	0.290118	0.270306	0.283251	0.141575	0.203301	0.236173	0.173807	0.227038	0.252971	0.197314	0.154999	0.10367	0.196001	-0.080255	0.190503	0.197188	0.132506	0.16589	0.050597	0.137355	0.160928	0.10325	0.0685001	0.181043	0.292465	0.378125	0.183426	0.128715	-0.220986	0.204061	0.20335	0.273193	0.254265	0.0948093	0.250637	0.140504	-0.00895484	0.00475709	0.131948	-0.0950035
cg17663463	0.0721481	-0.272424	-0.112692	0.0762334	-0.418366	0.0786178	-0.102764	-0.113795	-0.156444	-0.161379	-0.103786	-0.276288	-0.372639	-0.266349	0.0264204	0.0599847	-0.266289	-0.150128	0.211158	-0.228346	0.116724	-0.248454	-0.050269	-0.161816	-0.250573	-0.340703	-0.293298	-0.065877	-0.198982	-0.284973	-0.0965662	-0.139593	-0.285889	-0.255419	-0.214912	-0.0278383	-0.132973	0.165097	-0.35583	-0.258024	-0.171901	-0.225346	-0.177574	-0.0669049	-0.197655	-0.0982052	-0.260022	-0.174321	-0.23147
cg17740722	0.225974	0.402344	0.630778	-0.344106	0.433546	-0.121813	0.341255	0.361183	0.627808	0.619894	0.600682	0.542231	0.381614	0.530462	0.295056	0.372126	0.696839	0.392067	0.205738	0.467912	0.243171	0.459899	-0.259114	0.577897	0.462409	0.487927	0.426042	0.375959	0.455494	0.458631	0.395615	0.361431	0.428809	0.696998	0.534139	0.420598	0.40791	-0.370063	0.581759	0.482237	0.594423	0.477744	0.427896	0.512499	0.43448	0.392653	0.381967	0.42229	0.22297
cg18516833	-0.00396147	0.0312493	0.172392	-0.247067	-0.120371	-0.207171	-0.0404611	0.191952	0.12989	0.106682	0.138427	0.109774	-0.0304573	0.0566121	0.00895106	0.100357	0.0866372	0.0351812	0.0987791	0.13488	0.217565	0.0394672	-0.186845	0.089894	0.115473	0.0553452	-0.0127239	0.085585	-0.0855877	0.0920159	0.111384	0.0950059	-0.00560411	0.116633	0.0342804	0.182661	0.00184906	-0.0308364	-0.0113885	0.0421378	0.159803	0.163013	0.120692	0.0975061	0.0680509	0.0673189	0.0148039	-0.00266326	-0.150737
cg18644235	0.0702801	0.305614	0.285155	-0.308707	0.166774	-0.179522	-0.103721	0.258189	0.275763	0.196492	0.20113	0.349299	0.219627	0.325477	0.253072	0.170326	0.26629	0.24806	-0.0123508	0.275311	0.220939	0.158282	-0.163651	0.259534	0.290052	0.0686237	0.160338	0.0977659	0.0906221	0.232838	0.135996	0.00268556	0.160607	0.266739	0.358659	0.218174	0.0940896	-0.0974849	0.266548	0.243329	0.368246	0.244918	0.230096	0.189911	0.282507	0.0894331	0.0785886	0.13811	-0.0852786
cg19041006	0.120158	-0.176982	-0.0094384	0.116953	-0.242439	0.0900077	-0.0403849	-0.103579	-0.0214248	-0.0568526	0.0187225	-0.128911	-0.169646	-0.13041	-0.0555875	0.149299	-0.102762	-0.1363	0.0493927	-0.105691	0.102971	-0.0733467	-0.0139113	-0.055329	-0.0614291	-0.179392	-0.145378	-0.0516663	-0.0492201	-0.0993498	0.0447491	-0.0312234	-0.0589515	-0.0652128	-0.101472	-0.00377113	-0.114661	0.0839232	-0.133738	-0.139402	-0.0522819	-0.0846005	-0.0911773	-0.00232398	-0.128287	0.0820224	-0.0908313	-0.058129	-0.0405455
cg19212949	0.194429	0.424889	0.667743	-0.407926	0.401502	-0.271207	0.315545	0.293624	0.614469	0.59286	0.601057	0.51731	0.359701	0.616124	0.180387	0.348414	0.655191	0.360021	0.104729	0.481878	0.21796	0.435839	-0.311019	0.538951	0.495369	0.483086	0.413703	0.29589	0.489081	0.493325	0.315889	0.38491	0.424585	0.702117	0.522137	0.42337	0.345938	-0.585221	0.549297	0.490187	0.604121	0.459467	0.383878	0.470177	0.371766	0.42084	0.334563	0.349491	0.264044
cg19771589	-0.00399723	-0.130353	0.0481937	0.0388764	-0.0527116	0.0303193	0.0341583	-0.0739823	0.130316	0.187786	0.0761477	-0.0898629	-0.11129	-0.0114142	0.0183156	0.164573	-0.0298251	-0.0826592	0.139945	-0.0175179	0.203329	-0.0523093	-0.0452779	-0.0481721	0.0157652	-0.0527308	-0.113709	0.0794805	-0.0655479	-0.0831341	0.0412609	0.0323456	0.0270214	-0.0123053	-0.0697415	-0.0324575	0.123142	-0.0721067	-0.0785451	0.0442702	0.0436006	0.0126508	0.0890696	0.13264	-0.0344036	0.000340491	-0.0902154	-0.0590889	0.0966056
cg22220806	0.249754	0.357588	0.584868	-0.35415	0.418916	-0.0952594	0.239898	0.315574	0.56776	0.526238	0.49149	0.440855	0.321738	0.519755	0.176866	0.331833	0.600672	0.308679	0.147701	0.468408	0.231023	0.383648	-0.271021	0.487321	0.356837	0.479288	0.382864	0.40783	0.463807	0.445694	0.341026	0.284883	0.39453	0.586489	0.423086	0.327887	0.353518	-0.484466	0.458917	0.404391	0.537424	0.345528	0.39668	0.379911	0.41909	0.412408	0.370294	0.379514	0.223791
cg22561329	0.0396101	0.25097	0.434929	-0.211905	0.298322	-0.00735243	0.214296	0.240709	0.520081	0.459061	0.463559	0.405356	0.210605	0.383405	0.0835085	0.131833	0.545929	0.154509	0.108089	0.283046	0.1153	0.278214	-0.179426	0.41852	0.383257	0.446447	0.406972	0.129877	0.285957	0.371487	0.15085	0.340586	0.391595	0.519601	0.288073	0.17971	0.232213	-0.193099	0.487849	0.270213	0.415684	0.396962	0.308975	0.355907	0.450781	0.405388	0.270833	0.443637	0.22471
cg22927979	0.0551432	0.344778	0.395096	-0.251833	0.287972	-0.24492	0.269239	0.0995565	0.319114	0.613786	0.377973	0.365816	0.261849	0.416348	0.126496	0.270977	0.436092	0.348615	0.184188	0.230399	0.0445412	0.312076	-0.041988	0.343895	0.35283	0.291364	0.314803	0.107938	0.462597	0.458687	0.167598	0.200678	0.253783	0.436655	0.416424	0.209729	0.332969	-0.434864	0.381395	0.301172	0.409477	0.344581	0.101994	0.24422	0.180619	0.267629	0.307502	0.278654	0.213529
cg23849812	0.12946	0.254816	0.462105	-0.472622	0.258885	-0.343219	0.250089	0.240423	0.484253	0.286285	0.399099	0.3844	0.288102	0.398875	0.105402	0.414699	0.443263	0.194185	0.0452523	0.315171	0.0647191	0.349264	-0.393316	0.369195	0.370261	0.427073	0.238073	0.322839	0.382869	0.352497	0.246462	0.374594	0.307555	0.455063	0.335163	0.275761	0.268934	-0.574528	0.373806	0.378545	0.430945	0.288115	0.274049	0.314373	0.345852	0.308482	0.299537	0.17083	0.112966
cg24844423	-0.0942956	-0.0276756	-0.0319071	-0.0270819	-0.151798	-0.185149	-0.0894313	0.0552708	-0.164953	-0.116803	-0.0988619	-0.102559	-0.201483	-0.0585985	-0.0690478	-0.174686	-0.0692881	-0.0711977	0.00832313	-0.0380153	0.148293	-0.187109	0.00639252	-0.120839	-0.08352	-0.15142	0.0311401	-0.147824	-0.165531	-0.0926219	-0.106047	-0.104333	-0.128548	-0.0475347	-0.0370003	-0.0295239	-0.127018	0.0225009	-0.091698	-0.0303781	-0.121611	0.0442418	-0.139433	-0.0251184	0.00859359	-0.180528	-0.202402	0.136281	-0.111237
cg25257905	0.158643	0.274556	0.479411	-0.20034	0.275742	-0.184066	0.294259	0.130368	0.469754	0.525136	0.407158	0.364402	0.29099	0.456896	0.164248	0.358857	0.45264	0.178311	0.0326426	0.366964	0.208147	0.321878	-0.152919	0.344767	0.416424	0.361427	0.281206	0.313002	0.367407	0.386847	0.274522	0.309495	0.316945	0.470352	0.350705	0.244687	0.406909	-0.587792	0.39948	0.442073	0.510718	0.341924	0.266481	0.310662	0.265555	0.387243	0.309328	0.245415	0.258078
cg25401594	0.104924	0.287805	0.531395	-0.267283	0.331571	-0.0627221	0.248466	0.182514	0.546717	0.556075	0.46122	0.412561	0.321235	0.430144	0.0983867	0.419026	0.491383	0.203056	0.0725661	0.381209	0.102148	0.342356	-0.206795	0.377545	0.439863	0.421918	0.315376	0.22613	0.363253	0.368785	0.260583	0.282324	0.342429	0.510229	0.406616	0.310182	0.427465	-0.548591	0.424287	0.430582	0.557125	0.341329	0.314712	0.350948	0.182054	0.402802	0.242116	0.266283	0.207387
cg26537561	0.0338934	0.0685728	0.263389	0.0463321	0.0401042	-0.0304752	0.145216	-0.0919818	0.251202	0.100516	0.142221	0.139969	0.126759	0.207176	-0.0737694	0.233379	0.220956	-0.0632974	-0.22087	0.181712	0.0984183	0.150167	-0.0462796	0.102282	0.213038	0.169614	0.0935165	0.173674	0.147258	0.211468	0.119596	0.14805	0.141061	0.137659	0.0897566	0.136329	0.147575	-0.419603	0.133852	0.135526	0.184131	0.0846071	0.126943	0.139971	0.0634165	0.244892	0.109038	0.0501175	0.00933024
cg26917367	0.187633	0.296274	0.249184	-0.18459	0.123688	-0.0751695	0.143545	0.14883	0.198252	0.340501	0.321329	0.319529	0.145608	0.247443	0.331833	0.21661	0.329037	0.386375	0.272829	0.162834	0.147706	0.186059	-0.0174161	0.315224	0.263313	0.114678	0.210129	0.0669653	0.236964	0.224119	0.152269	0.0643315	0.196339	0.313438	0.400146	0.199504	0.200406	-0.12564	0.305813	0.121409	0.225268	0.103463	0.0830301	0.192879	0.0885815	0.214707	0.179667	0.202742	0.174337
cg27519373	0.105845	0.193902	0.331667	-0.170334	0.1779	-0.151336	0.22207	0.0243752	0.421785	0.250704	0.306173	0.236151	0.226653	0.301803	0.0762853	0.153007	0.348024	0.10186	-0.0765019	0.213229	0.107122	0.283597	-0.221009	0.304399	0.240444	0.284819	0.241427	0.202554	0.206198	0.296211	0.222399	0.340741	0.221595	0.380245	0.25477	0.201659	0.138411	-0.179606	0.255182	0.188423	0.364952	0.132273	0.224724	0.297415	0.214212	0.357245	0.229138	0.146905	0.158857
cg01671895	-0.0820599	-0.105105	-0.211994	-0.0635802	-0.0684972	0.139884	0.10887	-0.0953428	-0.123902	0.0297171	0.087662	-0.0573108	-0.0263989	-0.152911	-0.081809	-0.11123	0.000226914	0.103391	0.19185	-0.255454	-0.0922844	0.050401	-0.0128963	-0.0221426	-0.0874015	-0.147855	0.024633	-0.0420631	-0.115003	-0.099688	-0.0137482	-0.0391424	0.0632559	-0.0218523	0.0192977	-0.232203	-0.109263	0.0263896	0.142632	-0.10645	-0.189274	-0.0725876	0.0310105	0.0534803	-0.133727	-0.0320443	-0.0167091	0.0868573	0.0736333
cg11637980	-0.100981	-0.00539317	0.0431766	0.0031167	0.271913	-0.106544	0.0413138	0.0709216	0.177949	0.0489723	0.0352428	0.0665326	0.00373312	0.0534689	-0.0792142	-0.159792	0.198961	0.0662119	-0.00279547	0.0805704	0.0891055	-0.0245512	0.0836992	0.0915894	0.124313	0.31623	0.248135	0.069622	-0.0526482	-0.0190924	0.00490634	0.0201232	0.251421	0.156127	-0.00474042	-0.0293109	-0.0373382	-0.0937403	0.150856	-0.025462	-0.00428671	-0.0434808	0.244274	0.112985	0.136795	0.145291	0.107627	0.390273	0.21276
cg13686012	0.0712641	0.0299771	0.110844	-0.0750397	0.207616	-0.0681009	0.155883	0.106371	0.205721	0.217173	0.0799939	0.132119	0.176825	0.148004	-0.0485992	-0.06614	0.248874	0.250828	0.0395	0.175738	-0.0996803	0.135695	0.0754074	0.191485	0.262991	0.329182	0.203653	0.107927	0.152952	0.118733	0.171556	0.0331994	0.34312	0.25636	0.230215	-0.0219992	0.000768083	-0.220416	0.291359	0.100517	0.156588	0.126449	0.17798	0.136248	0.0654725	0.182264	0.258319	0.221934	0.132542
cg13906669	0.267442	0.114548	-0.00375507	0.11429	-0.102252	0.158124	0.0496767	0.0888228	-0.0898447	-0.116157	0.0727927	0.0724979	0.0588424	-0.000579121	0.0692225	0.0687694	-0.0302818	0.0832812	-0.00141548	-0.0333476	-0.0834689	0.00982755	0.085701	0.00212288	-0.016339	-0.0728314	-0.0556118	0.0883378	0.0336015	0.0407013	0.0368884	-0.208163	0.00727352	0.0295291	0.10264	0.0841308	0.0305133	0.068876	0.085133	0.102652	0.0403005	-0.0407154	-0.148518	0.0293133	-0.062479	0.0820447	0.0958324	-0.100064	-0.0281825
cg14772925	0.083235	-0.0744592	-0.0526843	0.117746	-0.10602	-0.0354365	-0.215095	-0.0356886	-0.153584	-0.195711	-0.0960986	-0.07839	-0.0924981	-0.0795628	-0.050528	0.0134293	-0.103691	-0.0803702	-0.0505557	-0.00944672	0.0253318	-0.0383836	0.0931496	-0.0437154	-0.0149149	0.0167802	-0.132858	-0.0962658	-0.163116	-0.0488939	-0.0500932	-0.0337674	-0.0485162	-0.0973373	-0.0829812	0.0838001	0.0506411	0.0340697	-0.0927865	-0.0938171	-0.0473781	-0.119233	0.0351949	-0.036325	-0.071293	-0.0838046	-0.0542548	-0.251515	-0.0787353
cg14933485	-0.0653662	-0.137043	-0.2253	0.184092	-0.0379182	-0.0470828	0.0132387	-0.134012	-0.10154	-0.014296	-0.23456	-0.170126	-0.209398	-0.193179	-0.0905093	-0.21007	-0.209312	-0.114979	-0.024246	-0.181259	-0.0804164	-0.154595	0.00226588	-0.185554	-0.126887	-0.0610655	-0.173977	-0.105219	-0.231853	-0.208281	-0.178875	-0.0263218	-0.234782	-0.238841	-0.205779	-0.202874	-0.0733656	0.0936018	-0.229685	-0.15692	-0.173719	-0.0690733	-0.126796	-0.227155	-0.26369	-0.0914206	-0.0930625	-0.0855663	-0.00780574
cg16462297	-0.010622	0.113	0.250083	0.0325813	0.188244	-0.0827708	0.232079	-0.0333343	0.311162	0.354931	0.193168	0.149249	0.1736	0.217444	-0.0480517	0.254171	0.260349	0.0314354	-0.0848715	0.130804	0.0574601	0.183454	-0.110205	0.175932	0.158943	0.185325	0.126702	0.214337	0.239038	0.257884	0.172858	0.213897	0.204916	0.204708	0.114111	0.0674424	0.109742	-0.329977	0.183984	0.158284	0.159264	0.130682	0.124047	0.1963	0.218915	0.167008	0.175948	0.101078	0.0998552
cg16581884	-0.0637457	-0.0714735	-0.140161	-0.0152537	-0.0412695	-0.0475572	-0.0424784	-0.102744	-0.0965812	-0.225148	-0.159627	-0.114976	-0.0543224	-0.102016	-0.111734	-0.105116	-0.0568468	-0.0834409	0.0443439	-0.10091	-0.0673237	-0.0833813	0.122626	-0.0809453	-0.189069	-0.115573	-0.00115626	-0.0657299	-0.150449	-0.117914	-0.0659025	-0.0301979	-0.0853224	-0.0215981	-0.0637987	-0.0945636	-0.153715	-0.0385281	-0.0711904	-0.211348	-0.213209	-0.125956	-0.0549306	-0.0992699	-0.197086	0.0774749	-0.068649	0.0623385	0.136576
cg16688583	-0.130973	-0.150616	-0.235181	0.0376743	-0.064063	-0.0257339	0.0821953	-0.164948	-0.109117	-0.232254	-0.130716	-0.139329	-0.0706503	-0.193593	-0.177047	-0.137899	-0.135105	-0.0625649	-0.101443	-0.216805	-0.0548305	-0.0775626	0.223975	-0.110144	-0.0414398	0.0430949	-0.0114446	-0.0277364	-0.072898	-0.167862	-0.0556517	-0.0242614	-0.166602	-0.136712	-0.221569	-0.101097	-0.0377159	0.150632	-0.0667462	-0.118458	-0.160935	-0.165086	-0.0796203	0.043038	-0.179661	0.0346541	-0.0341792	-0.0163465	0.163765
cg22299741	0.268864	0.288087	0.126865	0.0810765	0.233018	0.0670483	0.242453	0.253424	0.135705	0.094546	0.297177	0.36891	0.371549	0.184528	0.0714235	0.10466	0.176915	0.190786	-0.115005	0.184892	0.0384749	0.311639	-0.0378517	0.161542	0.154855	0.190628	0.0828933	0.323503	0.160331	0.281291	0.266112	0.0947944	0.294424	0.266654	0.199364	0.0786491	0.111785	0.0429847	0.296943	0.25898	0.101481	0.0674057	0.12861	0.118695	0.171701	0.146826	0.317246	0.0743583	0.0789187
cg22733687	0.0501396	-0.175926	-0.278088	0.064134	-0.0584792	-0.0936494	0.0771694	-0.3299	-0.0433753	-0.0632517	-0.198056	-0.181074	-0.0449305	-0.148769	0.0120085	-0.0168382	-0.0791227	0.0805662	0.0185621	-0.270546	0.0461034	-0.0879175	0.199847	-0.0238604	-0.0580388	-0.09152	-0.111804	-0.00956823	-0.169645	-0.0835001	0.0230522	0.0135505	-0.082892	-0.161075	-0.132532	-0.208108	-0.0635251	0.0204578	-0.0490364	-0.19285	-0.132351	-0.229641	0.0215055	-0.0244831	-0.254004	-0.0568903	0.0563167	-0.0656405	0.213249
cg23614125	0.182311	0.0195662	0.00282535	0.0106775	0.0328893	-0.195226	0.0369104	0.0948471	0.0273381	-0.0329163	0.103863	0.142733	0.0625798	0.0809215	0.132016	0.140998	0.0608863	0.0283229	-0.0257458	0.0163642	0.0793586	-0.0353531	0.046977	-0.0101968	0.115914	-0.101582	-0.00648598	0.116744	-0.00777415	0.145902	0.122558	-0.184744	0.0840057	0.041919	-0.0585268	-0.00516106	0.0678035	-0.0453006	0.138649	-0.0132978	0.0464023	0.0600887	0.0410612	0.0759745	0.0875384	0.101911	0.0775412	0.161694	0.154214
cg23641145	-0.0309309	-0.0260702	-0.171235	0.230641	-0.179787	-0.0336933	-0.0927939	0.0147006	-0.23021	-0.25765	-0.118793	-0.035403	-0.170658	-0.13011	-0.000691672	-0.0829903	-0.066305	0.000804225	-0.0247674	0.00690115	0.145559	-0.0880047	0.265751	-0.107432	0.00957366	-0.0544456	0.0504627	-0.143384	-0.215195	-0.132665	-0.183587	-0.0533413	-0.0424527	-0.0680465	-0.103196	0.0553419	0.0292577	0.0879742	0.0130272	-0.167164	-0.118255	-0.0959889	-0.0629902	-0.0359198	-0.176307	0.0410796	-0.0570879	0.0349909	0.111475
cg23795893	0.274847	0.148222	0.0625938	0.0683072	0.131894	-0.0590267	0.204753	0.100996	0.223126	0.206592	0.188852	0.210344	0.225174	0.177336	0.232305	0.0334812	0.265268	0.214287	0.0636171	0.0320629	-0.00260239	0.199536	0.0321089	0.300649	0.196582	0.200364	0.148841	0.128749	-0.0371407	0.224937	0.201529	0.295599	0.278199	0.217932	0.148665	-0.0395647	0.105872	-0.0313617	0.237648	0.0694648	0.116494	0.119175	0.225201	0.216892	0.220405	0.262693	0.268376	0.0990868	0.15033
cg25915838	0.159319	-0.154208	-0.211489	0.322968	-0.177521	-0.0528705	0.1662	-0.108295	-0.130468	-0.121324	-0.0712703	-0.106306	-0.0267697	-0.141638	0.00864121	-0.172119	-0.0742322	0.041432	0.0284531	-0.152837	-0.075541	0.0687385	0.174789	-0.0486675	-0.047298	-0.120299	-0.123075	-0.0380603	-0.146641	-0.0921105	0.0597987	0.0946469	0.0612892	0.0226192	-0.0518149	-0.0577538	-0.0757382	-0.0274629	-0.0313986	-0.101223	-0.184176	-0.0698315	-0.0628757	0.0840508	-0.146113	0.0547959	0.000940206	-0.124365	0.00111062
cg26705960	-0.0195799	-0.11618	-0.213241	0.26765	-0.165589	-0.0417556	-0.126991	-0.156604	-0.243065	-0.192294	-0.179282	-0.0765636	-0.13395	-0.1474	-0.114808	-0.0865985	-0.167369	-0.160451	-0.120175	-0.126764	-0.0570138	-0.142052	0.168785	-0.165253	-0.0516076	-0.138521	-0.144138	-0.192986	-0.193536	-0.00590047	-0.170655	-0.15258	-0.0803844	-0.110293	-0.134587	-0.0903014	0.012008	-0.0573952	-0.0626953	-0.124011	-0.180103	-0.133892	-0.104213	-0.161878	-0.174086	-0.119795	-0.0945094	-0.0945489	-0.0148553
cg27121959	0.185111	0.34063	0.427621	-0.317693	0.233693	-0.0580075	0.183729	0.381272	0.434413	0.182045	0.423958	0.44741	0.349065	0.448218	0.245766	0.223025	0.506488	0.291725	-0.114414	0.364338	0.23993	0.335553	-0.338907	0.436658	0.254278	0.205553	0.222725	0.342028	0.298388	0.27536	0.298321	0.174015	0.354904	0.511792	0.37336	0.24656	0.0161168	-0.212057	0.409549	0.275889	0.348758	0.228964	0.195604	0.232573	0.421182	0.335755	0.346382	0.270926	0.140676
cg00764632	0.00634353	-0.309945	-0.342974	0.249735	-0.053326	0.0707708	-0.0677855	-0.327512	-0.225443	-0.150539	-0.325085	-0.3111	-0.0464938	-0.225833	-0.196821	-0.224338	-0.203456	-0.0486371	-0.0463245	-0.339916	-0.485654	-0.178236	0.307897	-0.195923	-0.159468	-0.0815907	-0.0677141	-0.105918	-0.124989	-0.106046	-0.0381161	-0.199706	-0.200029	-0.230391	-0.208753	-0.366915	-0.0701603	-0.0324167	-0.12833	-0.159484	-0.209142	-0.194335	-0.0777632	-0.257233	-0.341238	-0.116322	-0.0162959	-0.0854318	0.0244821
cg01971813	0.123811	0.516461	0.416031	-0.165984	0.353053	-0.0757385	0.0923522	0.45217	0.276797	0.34132	0.277097	0.497064	0.18573	0.403874	0.489517	0.187536	0.458359	0.381162	0.199467	0.536339	0.321656	0.226559	-0.0420012	0.301905	0.407544	0.400518	0.322772	0.219682	0.227245	0.28926	0.0776027	-0.0250648	0.422555	0.445885	0.446209	0.395006	0.226766	-0.145843	0.403154	0.254844	0.302642	0.406986	0.26129	0.272447	0.327494	0.11295	0.184638	0.428897	0.126269
cg02280309	-0.28339	-0.298	-0.143937	0.0129495	0.0683579	0.0419751	0.107188	-0.253206	0.00696397	0.0451011	-0.0442412	-0.190977	-0.014383	-0.157411	-0.07738	-0.0323847	-0.0338744	-0.073843	-0.0837092	-0.162809	-0.311142	-0.150943	0.0360984	-0.153346	-0.17423	-0.0234456	0.00612019	0.0164916	0.0146149	-0.0666799	-0.03085	-0.11156	0.000730775	-0.100875	-0.131052	-0.292073	-0.103871	-0.0463488	-0.140421	-0.158194	-0.137499	-0.198112	-0.0609773	-0.111994	-0.153604	-0.0450586	-0.0373529	0.0953636	0.0899578
cg03314840	0.00992974	0.214571	0.33534	-0.265908	0.0911694	-0.0581352	0.0973498	0.339562	0.272646	0.264371	0.280706	0.252698	0.0357016	0.186464	0.136311	0.105695	0.35984	0.157766	0.22007	0.203913	0.0895031	0.0660683	-0.271503	0.260193	0.16908	0.213827	0.21489	0.0424218	0.00183018	0.127923	0.0658501	0.0300944	0.160161	0.342102	0.223604	0.230183	0.0618397	-0.142197	0.204885	0.0850014	0.213873	0.368112	0.214347	0.26868	0.213733	0.0648224	-0.00601532	0.316632	-0.126717
cg04897644	0.0206921	0.181923	0.333495	-0.120246	0.131052	0.00978581	0.0390317	0.294272	0.30396	0.229565	0.1909	0.181037	0.0798206	0.206304	0.111984	0.00521785	0.316671	0.0890342	0.0801929	0.259659	0.204489	0.0635809	-0.28234	0.253149	0.0727709	0.118546	0.227549	0.140085	0.0432116	0.129389	0.113338	0.0730134	0.169197	0.293739	0.179201	0.217465	-0.0268662	-0.101881	0.137693	0.0955801	0.169996	0.339079	0.251745	0.272899	0.280404	-0.0301803	-0.00227701	0.243067	-0.194195
cg09037777	0.173545	0.408408	0.36023	-0.20826	0.294568	0.00177274	0.157083	0.469186	0.302326	0.365758	0.308952	0.453235	0.173585	0.336998	0.492558	0.196648	0.453026	0.39829	0.271146	0.442759	0.167963	0.217972	-0.11817	0.296445	0.431637	0.338859	0.294407	0.183189	0.212698	0.289186	0.127082	0.0125494	0.391262	0.435959	0.418417	0.277225	0.249942	-0.117347	0.42333	0.207716	0.367921	0.367364	0.182667	0.228469	0.344242	0.192264	0.232838	0.389166	0.151391
cg11736940	-0.00182021	0.40733	0.461275	-0.325232	0.245314	-0.0717341	0.0925386	0.498854	0.300848	0.352315	0.356811	0.443405	0.0855633	0.346002	0.283671	0.205052	0.434718	0.305748	0.227652	0.478612	0.253591	0.103703	-0.25463	0.381177	0.296166	0.342982	0.218908	0.13811	0.171072	0.259617	0.019522	-0.0114043	0.339463	0.417347	0.403997	0.387149	0.193263	-0.18221	0.352601	0.175811	0.296612	0.476579	0.182864	0.275045	0.31646	0.0990891	0.144837	0.295127	-0.0451835
cg13497187	-0.0943294	-0.110744	-0.253726	0.00914185	0.0291722	0.0385479	-0.20631	-0.217734	-0.215503	0.02437	-0.211561	-0.194321	-0.0253554	-0.0895794	-0.130759	-0.127541	-0.199791	-0.154433	0.0132097	-0.226135	-0.326932	-0.165982	0.102616	-0.22655	-0.197354	-0.047034	-0.0065143	-0.176443	0.0433645	-0.0111291	-0.136963	-0.29473	-0.133736	-0.193819	-0.105162	-0.409568	-0.103919	-0.00979244	-0.166382	-0.175826	-0.0936129	-0.149039	-0.0715159	-0.444412	-0.189928	-0.172668	-0.0973395	0.0870159	0.0511336
cg14658346	-0.0724803	0.138865	0.301625	-0.101653	0.10177	-0.103955	0.135402	0.0149093	0.271859	0.26852	0.137375	0.180257	0.0994708	0.224408	0.0639758	0.218691	0.187301	-0.0297807	-0.0529394	0.159804	0.164016	0.130388	-0.0687044	0.180019	0.135555	0.26586	0.0547082	0.097341	0.276175	0.146255	0.0778129	0.147556	0.100773	0.194351	0.0994187	0.203032	0.154009	-0.202767	0.0468015	0.216331	0.211443	0.297167	0.127916	0.131702	0.0774804	0.149639	0.0817722	0.121021	0.0678424
cg15490880	-0.0618652	-0.507885	-0.643929	0.366337	-0.412743	0.243277	-0.159246	-0.52398	-0.532337	-0.33141	-0.53026	-0.538022	-0.358898	-0.67853	-0.171275	-0.246521	-0.586992	-0.188485	0.00865798	-0.590573	-0.401652	-0.356893	0.404713	-0.431771	-0.414303	-0.422874	-0.344456	-0.302915	-0.26843	-0.375045	-0.290334	-0.339972	-0.493405	-0.569306	-0.458988	-0.455843	-0.125354	0.393754	-0.403457	-0.464821	-0.413564	-0.490834	-0.496941	-0.416853	-0.61906	-0.315843	-0.182129	-0.284642	-0.0466848
cg15708776	-0.123333	-0.0680679	0.132581	-0.223568	0.224834	-0.0947049	0.154388	-0.0574351	0.273938	0.218191	0.151037	0.0164201	0.134159	0.124746	-0.0115747	0.11158	0.138539	0.00633431	-0.089502	0.0680736	-0.0128064	0.016246	-0.224328	0.0807953	0.00838033	0.165356	0.0129447	0.226164	0.0462897	0.148378	0.195426	0.0196517	0.136321	0.142618	0.024552	-0.092666	-0.0680916	-0.1829	0.0255808	0.0656663	0.106382	0.0554014	0.204313	0.14307	0.107778	0.106228	0.0558526	0.133693	0.097608
cg17283294	0.0556758	0.00445138	-0.0107888	0.00724747	0.156432	0.0509243	-0.29353	0.0556269	-0.0292273	0.139338	-0.0407976	-0.0673361	-0.0477987	0.10269	-0.130762	-0.0600589	0.0232277	-0.12989	0.119904	0.0541103	-0.153726	-0.0608367	-0.00834548	-0.0745703	-0.00740856	0.0698555	0.110759	-0.0347085	0.152498	0.177101	-0.0366277	-0.151506	0.129678	0.0481056	-0.0346538	-0.252593	-0.103476	-0.0928768	-0.0503395	-0.0633746	-0.0412954	0.0698471	0.143968	-0.264242	0.17285	-0.0478843	-0.0305637	0.167393	0.0267626
cg23109894	0.0838622	0.140834	0.159808	-0.00718082	0.0965616	-0.0480316	0.1417	0.0432994	0.16044	0.382734	0.10386	0.150447	0.0805275	0.136236	0.147388	0.26769	0.143577	0.0872557	0.143652	0.0813637	0.11365	0.10313	0.0347642	0.11353	0.187287	0.134827	0.0830179	0.121739	0.157798	0.156171	0.0739786	0.0960689	0.076981	0.153591	0.142285	0.0981131	0.326002	-0.340459	0.143534	0.217424	0.224385	0.135923	0.0392445	0.113306	0.0837192	0.119589	0.106422	0.10101	0.115497
cg23993235	-0.0634603	-0.0572548	0.17888	-0.11684	0.058527	-0.029996	0.116479	-0.112189	0.257718	0.14194	0.207272	0.0491032	0.0250961	0.131506	0.0720494	0.199709	0.160664	-0.0464569	-0.0125074	0.0754227	0.0378105	-0.0195706	-0.193259	0.0546464	0.104691	0.179473	0.0378459	0.128914	0.0459921	0.152235	0.104136	0.072789	0.127646	0.137148	-0.00364256	0.000260606	-0.000323434	-0.0974418	0.02059	0.0397993	0.182089	0.102362	0.167875	0.176024	0.12917	0.155615	0.0342418	0.098731	0.0735091
cg25651783	-0.0230759	0.216527	0.290792	-0.17892	0.277841	0.048383	0.0165494	0.261428	0.207135	0.138074	0.174225	0.25104	0.0855135	0.283678	0.0490033	0.094785	0.317011	0.206766	0.0396639	0.319853	0.209673	0.0412239	-0.181327	0.275565	0.191594	0.248722	0.299963	0.148604	0.0291932	0.260857	0.0192926	0.014188	0.342561	0.268968	0.228665	0.175559	0.0330739	-0.198542	0.261077	0.134375	0.0714518	0.124448	0.297264	0.187244	0.281997	0.044957	0.144971	0.235682	-0.00457543
cg04544475	0.0352905	-0.0937612	-0.238848	0.0541806	-0.00508769	0.0175226	0.160879	-0.279666	-0.0131031	0.146676	-0.0547021	-0.142047	0.135714	-0.0344588	0.0920223	-0.0216898	-0.0221217	0.136351	0.0711313	-0.200381	-0.0834436	0.1659	0.161965	0.0267794	-0.0241615	-0.0891316	0.00518289	0.112843	0.0936493	-0.00383644	0.283624	0.145205	-0.00648264	-0.000501641	0.0578214	-0.282968	-0.0761273	0.0939416	-0.00310455	-0.0766026	-0.00203889	-0.0816384	0.0439487	0.00684	-0.126459	0.0436487	0.0910627	-0.05185	0.213164
cg04654677	0.0752483	-0.027136	-0.198932	0.158676	-0.0565398	-0.0686157	0.16237	-0.192023	-0.0482928	-0.0946981	-0.119108	-0.071249	0.139245	-0.0703084	0.0865408	-0.106333	-0.0226608	0.164074	-0.0544525	-0.111051	-0.0169675	0.0984895	0.159785	0.0755752	0.00316622	-0.12682	-0.0430471	-0.00776152	-0.201585	-0.1192	0.131966	0.0998716	-0.0377603	-0.0152297	0.0636722	-0.0466659	-0.1094	0.12969	0.0743883	-0.0456363	-0.0880108	-0.0313408	0.0386156	0.102889	-0.237579	-0.0198956	0.0744633	-0.0949903	0.141051
cg04780629	0.0859029	0.0775237	-0.227618	0.0233298	0.0248704	-0.0486555	0.20444	-0.101036	-0.0917026	-0.0355228	-0.0791895	0.0648354	0.262223	0.0682637	0.0994122	0.0980528	-0.049822	0.249876	0.0172031	-0.0976914	0.0222384	0.25571	0.268063	0.103659	0.142649	-0.0963457	-0.104937	0.160187	-0.00169378	0.00907873	0.216879	0.0962	0.0187835	0.0180994	0.0901268	-0.0701903	-0.00658542	0.0641643	0.161521	0.107253	-0.0122214	-0.0462931	0.0721025	-0.0500174	-0.206889	-0.0737926	0.186225	-0.153586	0.282566
cg14398214	-0.0993761	-0.805896	-0.576025	0.270344	-0.347281	0.097918	-0.450397	-0.560288	-0.502008	-0.459813	-0.588289	-0.812264	-0.526514	-0.641877	-0.415157	-0.281764	-0.619846	-0.456241	-0.0265877	-0.559267	-0.381311	-0.641199	0.28744	-0.576608	-0.500354	-0.466599	-0.480717	-0.350946	-0.390291	-0.495136	-0.289625	-0.560774	-0.373345	-0.655136	-0.60332	-0.560105	-0.299797	0.22272	-0.593331	-0.524724	-0.471148	-0.633951	-0.383097	-0.446174	-0.374533	-0.299228	-0.38292	-0.34946	-0.159557
cg18366480	-0.0848321	0.121832	0.219675	-0.121195	0.0190904	0.0161522	0.00131724	0.187902	0.103701	0.0762073	0.149806	0.137762	-0.0757434	0.075856	0.0759177	0.0442317	0.120681	-0.0498576	-0.0908824	0.0965023	0.205098	-0.000414296	-0.224304	3.07594e-05	0.00550416	0.192378	0.0559586	0.0455425	0.100815	0.0526135	-0.0887716	-0.0324625	0.0989615	0.103763	-0.00450893	0.137928	-0.0613998	-0.107462	-0.0380314	0.00331166	0.0574247	0.0424958	0.0261877	0.0933262	0.224991	0.000213954	-0.0677162	0.0777806	-0.244691
cg21917866	-0.0400958	-0.187214	-0.210338	-0.149553	-0.183067	-0.197151	-0.0536481	-0.199605	-0.141001	-0.235029	-0.14118	-0.236885	-0.0824606	-0.184511	-0.0403701	0.119474	-0.201692	-0.251766	0.0637896	-0.210971	-0.0431119	-0.17436	-0.0628308	-0.277723	-0.110037	-0.139896	-0.156747	0.028767	-0.174724	-0.152735	0.0390988	-0.172381	-0.13697	-0.187859	-0.174268	-0.274318	-0.198339	0.0575499	-0.217301	-0.173905	-0.166304	-0.0603154	-0.0194979	-0.167241	-0.175969	-0.173769	-0.146311	-0.00407934	-0.070437
cg24835159	-0.152411	-0.714117	-0.694019	0.350915	-0.498622	0.10625	-0.485243	-0.652295	-0.705428	-0.54512	-0.759986	-0.827594	-0.580553	-0.712333	-0.371851	-0.310708	-0.802151	-0.477036	-0.0886404	-0.673197	-0.369426	-0.673954	0.386373	-0.649308	-0.566009	-0.587066	-0.547996	-0.475596	-0.423036	-0.56737	-0.433927	-0.635966	-0.575348	-0.821396	-0.647283	-0.545581	-0.26303	0.332941	-0.68614	-0.539499	-0.564151	-0.633005	-0.550047	-0.563217	-0.618544	-0.507656	-0.458711	-0.486413	-0.236506
cg00101712	0.101184	0.409098	0.396961	-0.216222	0.285645	-0.156728	0.0180298	0.3571	0.140396	0.280691	0.161296	0.33497	0.176662	0.383119	0.1787	0.123372	0.358931	0.234134	-0.0211531	0.40292	0.191132	0.239599	-0.133981	0.280557	0.198083	0.232326	0.178392	0.139653	0.213477	0.250505	0.0602591	0.0055724	0.203367	0.368863	0.33174	0.349729	0.233487	-0.213268	0.260877	0.249971	0.208696	0.402725	0.125342	0.250125	0.201188	0.0288194	0.129998	0.241294	0.0513689
cg02692893	-0.0651805	0.165487	0.192648	-0.0354345	0.267297	-0.00739828	0.209953	0.0268556	0.288395	0.493165	0.168531	0.162921	0.200735	0.228139	0.151886	0.182796	0.208182	0.143682	0.127948	0.16232	0.072415	0.168541	-0.0721903	0.178046	0.111508	0.181198	0.136666	0.233342	0.245261	0.235769	0.17679	0.180832	0.204782	0.222	0.205016	0.0155978	0.152392	-0.225726	0.106816	0.202713	0.187433	0.202002	0.159449	0.0946741	0.129355	0.0687676	0.162877	0.161021	0.142491
cg03187777	-0.0374324	0.0890205	0.0106692	-0.144697	0.00418724	-0.0857316	0.021553	0.149735	-0.0694987	-0.222313	-0.117767	0.0498191	-0.0124613	-0.0298049	-0.0571481	-0.0309227	0.121525	0.0316623	0.0113533	-0.00352464	0.0318644	0.0400312	0.0103616	0.03389	0.0365525	-0.0258163	0.160666	-0.0765722	-0.120339	-0.075583	-0.0614443	-0.0201481	-0.0494634	0.0988717	0.0441868	0.110586	-0.0220194	-0.04831	0.0988535	-0.0681113	-0.161771	0.0349067	0.00447526	0.0958084	-0.126424	-0.0118964	-0.0478388	0.195029	-0.00113227
cg09298623	-0.0500605	-0.355294	-0.289644	0.0492766	-0.269737	-0.00527028	-0.0112264	-0.34849	-0.145075	-0.101277	-0.0867729	-0.276939	-0.0700356	-0.326313	-0.111835	-0.0269293	-0.156607	-0.0516316	0.149667	-0.390489	-0.38606	-0.092883	0.0245237	-0.181165	-0.210568	-0.14514	-0.0865622	-0.124359	-0.113256	-0.152421	-0.00612694	-0.0284563	0.00163164	-0.1798	-0.175613	-0.388931	-0.131256	-0.058026	-0.127959	-0.251043	-0.17579	-0.36679	-0.163251	-0.169864	-0.205165	0.0341	0.0217558	-0.126632	-0.0288484
cg03876732	0.245627	0.489618	0.665673	-0.342299	0.335901	-0.028513	0.209727	0.521618	0.584012	0.365763	0.580834	0.599102	0.4172	0.612865	0.307896	0.347996	0.716663	0.413723	0.0437667	0.544304	0.241524	0.466408	-0.318879	0.605456	0.520007	0.47656	0.45038	0.403346	0.421846	0.46026	0.363454	0.341401	0.516488	0.70943	0.549616	0.434007	0.220389	-0.414923	0.583465	0.469333	0.520139	0.415677	0.434818	0.461973	0.636038	0.420316	0.38407	0.343461	0.0277851
cg04844977	0.136625	0.688309	0.621325	-0.236463	0.383684	-0.0792125	0.129285	0.474207	0.352616	0.437076	0.406707	0.594544	0.257228	0.596928	0.427829	0.235163	0.581162	0.377867	0.0388594	0.553888	0.417532	0.340034	-0.217907	0.483903	0.393847	0.385617	0.356461	0.250149	0.382346	0.447306	0.141723	0.0815375	0.341372	0.558	0.540486	0.492412	0.288921	-0.239062	0.456896	0.368258	0.393234	0.497423	0.207457	0.318778	0.440104	0.100593	0.211344	0.370546	0.0399524
cg05258757	0.152884	0.643969	0.546991	-0.265459	0.424265	-0.0615834	0.23724	0.419678	0.395532	0.471778	0.39305	0.578883	0.358361	0.588174	0.354382	0.201283	0.582282	0.438263	0.0588012	0.537272	0.350519	0.418961	-0.235628	0.494609	0.395846	0.407292	0.352579	0.285619	0.389272	0.501653	0.226792	0.183536	0.408089	0.556874	0.588965	0.416127	0.287752	-0.327074	0.487571	0.3641	0.427424	0.462877	0.266312	0.378591	0.434698	0.171776	0.28654	0.30349	0.0579466
cg07574244	-0.0577024	-0.445834	-0.608352	0.218249	-0.29525	0.0487937	0.178331	-0.5162	-0.336519	-0.295876	-0.288452	-0.42128	-0.0641962	-0.40496	-0.230337	-0.142753	-0.315719	-0.140955	-0.0340191	-0.514759	-0.354202	-0.119636	0.297741	-0.357422	-0.265317	-0.396045	-0.263467	-0.155609	-0.250122	-0.17204	0.00746589	-0.00936059	-0.165927	-0.300717	-0.327859	-0.564711	-0.291809	0.148382	-0.168049	-0.352706	-0.360574	-0.465384	-0.290219	-0.370685	-0.424428	0.0316426	0.0169592	-0.191482	0.19286
cg13431165	0.201993	0.69503	0.59566	-0.208491	0.35148	-0.0520714	0.169886	0.442587	0.336584	0.435921	0.425296	0.598554	0.346625	0.605403	0.482641	0.284316	0.591403	0.421177	0.00530518	0.50887	0.367662	0.394568	-0.224087	0.470571	0.430808	0.393752	0.343215	0.306006	0.395095	0.517108	0.243565	0.107116	0.31606	0.571948	0.593855	0.452855	0.232025	-0.240857	0.486249	0.387031	0.430753	0.450869	0.244167	0.302358	0.478196	0.0967736	0.232843	0.319859	0.0530573
cg18651515	0.221663	0.607958	0.575391	-0.287612	0.343708	-0.137508	0.144539	0.50145	0.340584	0.468065	0.411771	0.582911	0.292643	0.551955	0.339924	0.250659	0.549658	0.40831	0.0935374	0.530047	0.320533	0.384822	-0.252813	0.489741	0.364655	0.363158	0.279517	0.257589	0.347663	0.449477	0.183062	0.115122	0.327299	0.56046	0.549426	0.481209	0.338666	-0.317498	0.445473	0.379214	0.450914	0.502862	0.252817	0.369568	0.398329	0.156699	0.245262	0.290232	0.00181715
cg22082549	0.00381457	-0.466661	-0.410994	0.307797	-0.32214	0.3097	-0.372322	-0.262118	-0.335052	-0.227746	-0.381673	-0.427898	-0.440761	-0.554058	-0.0866993	-0.19657	-0.459387	-0.184822	0.116929	-0.453169	-0.347657	-0.475481	0.213492	-0.270643	-0.390519	-0.322113	-0.31791	-0.251062	-0.350357	-0.416714	-0.313637	-0.443917	-0.36358	-0.462266	-0.449113	-0.329969	-0.0648779	0.387852	-0.391993	-0.345322	-0.3385	-0.352665	-0.305914	-0.248568	-0.366891	-0.303685	-0.242782	-0.249942	-0.197391
cg04774040	-0.174121	-0.00941128	0.235877	-0.164809	0.288471	-0.0251365	0.0224015	0.142394	0.217552	0.0742507	0.0010319	0.072186	-0.0128588	0.218445	-0.172281	0.0963802	0.184505	-0.0863258	-0.209962	0.306104	0.203093	-0.0468574	0.00400491	0.128816	0.286271	0.193145	0.0842979	-0.0574552	0.135198	0.158569	-0.100264	0.0265913	0.140196	0.117454	0.00313545	0.234846	0.277495	-0.192733	0.159301	0.219879	0.203304	0.103144	-0.0358687	0.0721108	0.274132	0.13425	0.0378325	0.090276	0.0675747
cg05760722	0.267618	0.517726	0.455004	-0.21267	0.361934	-0.046737	0.126591	0.354266	0.369261	0.352955	0.354271	0.549643	0.527336	0.612119	0.344295	0.357372	0.466209	0.482297	-0.137371	0.503168	0.312753	0.504291	-0.144957	0.458746	0.414662	0.352508	0.167678	0.447097	0.46164	0.522491	0.36563	0.176921	0.407842	0.540983	0.580858	0.308051	0.169164	-0.275533	0.443197	0.430096	0.403128	0.222772	0.249246	0.226506	0.317235	0.213789	0.507026	-0.00211763	0.177618
cg05861454	-0.1973	-0.00972405	0.252076	-0.149836	0.220576	-0.0263317	-0.00714421	0.188879	0.306338	-0.0342483	0.0734861	0.0870502	-0.0248419	0.263176	-0.0705171	0.102827	0.282874	0.032698	-0.102355	0.212749	0.0565282	-0.00426866	0.0257637	0.304327	0.213596	0.223957	0.245182	0.0105988	0.0712977	0.0951984	-0.0236743	0.195424	0.163284	0.225369	-0.0263767	0.211473	0.206433	-0.128798	0.184253	0.242368	0.157857	0.109144	0.151455	0.247839	0.312328	0.278353	0.0997832	0.152457	0.164491
cg06014251	-0.0592615	-0.00698569	0.208968	-0.0801906	0.0967573	-0.00999744	0.17038	0.0308086	0.264231	0.0533191	0.147382	0.00352754	0.0698542	0.158198	-0.0701293	0.0154597	0.139985	-0.076344	-0.266506	0.140573	0.109901	-0.0205377	-0.232576	0.148465	-0.0592091	0.0989093	-0.0142127	0.244953	0.10096	0.132909	0.0681295	0.0987718	0.102516	0.14739	-0.0434171	0.0497895	-0.0264127	-0.186696	-0.0517478	0.110529	-0.0609276	0.0752831	0.106457	0.132032	0.11028	0.135678	0.069338	0.00579266	-0.00512259
cg08140412	0.16755	0.380563	0.614481	-0.418024	0.419052	-0.166762	0.237769	0.294297	0.620314	0.456255	0.452288	0.43474	0.406746	0.597447	0.112225	0.377411	0.571634	0.269128	-0.114198	0.462742	0.2156	0.390758	-0.360502	0.470378	0.382738	0.416949	0.302815	0.48235	0.499647	0.487092	0.342246	0.294783	0.421982	0.578498	0.415164	0.259435	0.20298	-0.568979	0.427041	0.512051	0.436677	0.362508	0.372808	0.328663	0.428349	0.302222	0.406486	0.260615	0.136489
cg08253824	-0.093609	0.0367415	-0.176006	0.0455404	-0.142175	0.0694745	0.0905286	-0.0829162	-0.18817	0.0314747	0.0184841	-0.0156171	-0.0634225	-0.188451	0.00438063	-0.146592	-0.168674	0.0123178	0.151093	-0.217001	-0.0416482	-0.0136431	-0.00779979	-0.230547	-0.11663	-0.100403	-0.0150322	-0.102409	-0.0198898	-0.183374	-0.0230908	-0.150017	-0.212912	-0.119715	0.0882167	-0.0742989	-0.144869	0.0199459	-0.123846	-0.145253	-0.0267655	0.0607045	-0.072968	-0.128453	-0.281361	-0.0824925	-0.203492	0.0615045	-0.0715053
cg10170677	-0.0419016	-0.0056589	0.042506	-0.0579988	0.0289162	-0.0682759	-0.040448	-0.0721977	-0.065011	0.0528233	-0.0827391	-0.10258	-0.0214959	-0.0436492	-0.0827849	-0.0347066	-0.00387048	-0.0333816	-0.0255907	0.0232487	0.0477337	-0.0786062	0.0782307	-0.00373558	-0.138429	-0.00303664	-0.00485532	0.0547499	-0.0158956	-0.034625	-0.0739007	-0.0941013	0.0174097	-0.0317268	-0.0352459	-0.0122918	-0.000385886	-0.0734915	-0.0435928	0.0362273	-0.19393	-0.0998278	0.00968709	-0.0398355	-0.0144166	-0.0543514	-0.00966604	0.00492043	-0.0504369
cg12536786	0.0857488	-0.0132655	0.118432	0.0207574	-0.0594417	0.0695472	-0.00340941	0.073587	0.088396	0.013732	0.120501	0.0252759	0.014352	-0.0304914	0.0250069	0.135947	0.0734195	-0.00555491	-0.0527516	0.0763666	0.0448282	0.0528779	-0.0154823	0.0288848	0.0326254	0.0442082	-0.0781563	0.0590085	0.0807084	0.0622826	0.0803921	0.00555689	0.0827212	0.140528	0.0609025	0.0819212	-0.111891	-0.0945854	0.0294313	-0.010332	0.00667308	-0.0429282	0.0849737	0.0698984	0.0996913	0.122011	0.000797787	-0.00640048	-0.0245905
cg13576200	-0.0634671	0.0432439	0.117455	-0.115768	-0.0723084	0.0771649	0.148068	0.0308017	0.127883	0.136799	0.153134	0.0622147	-0.00860939	-0.0601723	0.0529141	0.0847396	0.0606109	-0.0250979	0.133812	0.0180858	-0.0189446	0.0490853	-0.221011	-0.0705736	0.000601725	0.112191	0.0332299	0.11262	0.0112662	0.00288711	0.0564548	0.0493717	-0.0236511	0.0525899	0.0469504	0.0106466	-0.00553966	-0.200354	-0.0214451	-0.0110485	0.135958	0.151987	0.0929716	-0.00365874	0.0148271	0.0933206	-0.0510372	0.200885	-0.174831
cg15029631	-0.00733003	0.0741725	0.0551413	-0.136523	0.0435126	0.0525169	0.233668	-0.0712058	0.0845021	0.254076	0.189353	0.0534896	0.0965172	0.0280184	0.105835	0.131061	0.042406	0.0965776	0.173572	-0.0672661	-0.019473	0.134471	-0.113924	-0.161727	0.0387246	0.0936612	0.119312	0.0570087	0.1831	0.0424541	0.128673	0.0380487	0.0958105	0.0741626	0.155851	-0.0343524	0.0176902	-0.152409	-0.016025	0.0385052	0.16305	0.0739918	-0.0280359	0.0796776	-0.0739159	0.110029	-0.00422511	0.191961	0.0470576
cg15422644	0.236996	0.294447	0.373227	-0.0619142	0.349383	0.0409324	0.186205	0.197044	0.364295	0.521935	0.397361	0.344793	0.326498	0.423344	0.124764	0.253237	0.428526	0.207605	-0.0294205	0.343211	0.0846505	0.331851	-0.104132	0.306863	0.386105	0.284555	0.253039	0.27408	0.475342	0.476299	0.313068	0.127433	0.385801	0.466721	0.325218	0.0954803	0.21717	-0.290427	0.396473	0.337529	0.394963	0.300317	0.220305	0.130595	0.349983	0.273846	0.366897	0.266203	0.25775
cg15618336	0.0486743	0.220438	0.439133	-0.139497	0.340457	-0.0221562	0.268712	0.112308	0.457795	0.457876	0.330459	0.220994	0.235231	0.368937	-0.00989222	0.158991	0.376307	0.132743	-0.120499	0.334102	0.237694	0.257035	-0.311736	0.325415	0.154646	0.30826	0.229099	0.401409	0.322222	0.313637	0.252261	0.273803	0.227238	0.363363	0.243888	0.184945	0.156407	-0.410705	0.183311	0.317093	0.304255	0.226713	0.285188	0.288832	0.232291	0.218881	0.247047	0.200572	0.120843
cg16918684	-0.151866	0.0505853	-0.153895	-0.154074	-0.161748	-0.101466	0.106146	-0.106298	-0.100458	0.11708	0.0899442	-0.0191825	-0.0696019	-0.140574	0.0194176	-0.00988664	-0.173333	-0.0262474	0.204082	-0.162579	0.103207	0.0139516	-0.220245	-0.22605	-0.120059	-0.158269	-0.0294797	-0.0761228	-0.116042	-0.0793879	-0.0290677	0.0310944	-0.133305	-0.103031	0.0386238	-0.145145	-0.111887	-0.165557	-0.122897	-0.120328	0.01012	0.0805353	-0.0279951	-0.081211	-0.169902	-0.0203695	-0.211737	0.0248878	-0.121533
cg19055098	0.157597	0.300696	0.423278	-0.386089	0.340407	-0.045213	0.000345963	0.323198	0.386751	0.259899	0.349786	0.347404	0.325507	0.482237	0.00481406	0.194942	0.424012	0.167665	-0.0643529	0.378816	0.0641533	0.301089	-0.291762	0.32558	0.265237	0.330498	0.297972	0.264281	0.448703	0.388393	0.204216	0.153404	0.392756	0.465808	0.312412	0.105675	0.0868678	-0.444769	0.379975	0.312515	0.321342	0.222955	0.24985	0.109539	0.37333	0.276491	0.31497	0.250763	0.177458
cg19760651	0.0879833	0.304064	0.484152	-0.179522	0.323011	-0.104359	0.27526	0.126397	0.492285	0.30365	0.378584	0.336908	0.346451	0.48949	0.105268	0.160775	0.486392	0.195284	-0.292173	0.42636	0.225191	0.383331	-0.293318	0.359408	0.252007	0.392169	0.262582	0.379955	0.346008	0.409218	0.308842	0.361095	0.346318	0.461929	0.235353	0.268358	0.100125	-0.363558	0.278149	0.3329	0.335228	0.240929	0.318966	0.318287	0.369283	0.333551	0.337011	0.191685	0.134315
cg20059682	0.129745	0.44699	0.431478	-0.11445	0.372439	-0.00433748	0.406524	0.270598	0.433755	0.479101	0.519687	0.533314	0.449865	0.507383	0.276069	0.261122	0.620848	0.445681	0.0738227	0.380758	0.234857	0.464295	-0.0786669	0.5195	0.394479	0.46287	0.364179	0.33954	0.434452	0.483722	0.318819	0.294337	0.478849	0.637125	0.573938	0.279268	0.288493	-0.263359	0.6024	0.281946	0.407878	0.331059	0.279289	0.317881	0.310049	0.329109	0.449613	0.332792	0.28311
cg20942339	-0.242605	-0.180081	-0.346607	0.179568	-0.339618	0.0947967	-0.0912529	-0.360442	-0.36845	-0.401328	-0.347069	-0.303697	-0.137078	-0.3152	-0.0964872	-0.2581	-0.375797	-0.337664	-0.203899	-0.412668	-0.0827861	-0.217975	0.0563364	-0.310535	-0.402443	-0.312951	-0.157274	-0.286206	-0.249565	-0.354496	-0.167285	-0.205248	-0.33455	-0.369373	-0.213273	-0.256635	-0.359338	0.289533	-0.319453	-0.325637	-0.363803	-0.281394	-0.274925	-0.232014	-0.365873	-0.321783	-0.306673	-0.158281	-0.115177
cg21834754	0.0687788	0.226724	0.372587	-0.144717	0.328105	-0.0736998	0.248406	0.168078	0.414699	0.537729	0.333734	0.259445	0.249079	0.34825	0.170196	0.270138	0.36963	0.190212	0.0425112	0.336664	0.167496	0.254187	-0.156241	0.308861	0.267642	0.280885	0.254017	0.322353	0.331698	0.306202	0.258605	0.256663	0.250526	0.38362	0.234215	0.14907	0.287884	-0.411141	0.297476	0.378466	0.348986	0.315955	0.248878	0.265517	0.272409	0.27278	0.255122	0.24166	0.263216
cg21865762	0.0882401	0.362012	0.406491	-0.102482	0.346793	-0.0739037	0.340596	0.121232	0.44397	0.458233	0.345699	0.375354	0.336047	0.505186	0.128924	0.137243	0.419107	0.243853	-0.120934	0.399301	0.235037	0.374168	-0.166126	0.319557	0.255381	0.280806	0.268107	0.373031	0.411017	0.417372	0.314421	0.278862	0.296549	0.430379	0.333969	0.211873	0.222464	-0.260477	0.275468	0.370661	0.439377	0.340999	0.224385	0.266103	0.341312	0.270505	0.336955	0.266435	0.246156
cg21974358	0.317456	0.55516	0.529273	-0.225526	0.380145	-0.0407033	0.161544	0.466045	0.407811	0.360781	0.42757	0.592393	0.546072	0.625493	0.399743	0.31976	0.559005	0.495287	-0.105863	0.549781	0.249412	0.547364	-0.190711	0.538749	0.418797	0.438963	0.234816	0.494818	0.492288	0.540942	0.396515	0.242739	0.486374	0.637569	0.604636	0.351123	0.146361	-0.279605	0.51061	0.430292	0.403316	0.292628	0.279825	0.264925	0.428002	0.198372	0.52278	0.068467	0.12856
cg22199410	-0.102755	0.189081	0.292565	-0.202328	0.342141	-0.162679	0.189808	0.186743	0.389674	0.278898	0.221021	0.287313	0.114681	0.318771	-0.0259413	0.148798	0.309689	0.104164	-0.00248224	0.330293	0.161268	0.179206	0.0356193	0.239444	0.410741	0.387168	0.404686	0.0947974	0.323153	0.248231	-0.00970307	0.233207	0.287693	0.29634	0.145694	0.223763	0.387182	-0.251515	0.268513	0.338432	0.387542	0.233163	0.127407	0.237113	0.249074	0.375812	0.182672	0.275428	0.301335
cg23909029	-0.0179784	-0.111676	-0.140597	0.00962764	-0.156517	-0.0848616	-0.124819	-0.109637	-0.164639	-0.193756	-0.170092	-0.144276	-0.0954521	-0.197744	-0.0552022	-0.130606	-0.15707	-0.132571	0.0221792	-0.146483	-0.0742989	-0.0965672	-0.0529836	-0.126817	-0.271105	-0.140716	-0.102069	-0.135028	-0.171249	-0.113649	-0.0747656	-0.108375	-0.114987	-0.146352	-0.133462	-0.0718305	-0.218367	-0.0378021	-0.159336	-0.269508	-0.169872	-0.168813	-0.109468	-0.0703092	-0.112688	-0.0400707	-0.119476	-0.0824743	-0.150767
cg24534098	0.0759091	0.163988	0.137098	0.0188244	0.188293	-0.0244118	0.0155851	0.210023	0.0923025	0.133267	0.0829223	0.18137	-0.00959377	0.110221	0.0809864	-0.0373776	0.128332	0.182961	-0.0570008	0.168523	0.108114	0.0751883	0.0244964	0.181991	0.0902957	0.19921	0.0910635	0.144798	0.124826	0.136768	0.0140816	-0.0298644	0.0299973	0.145352	0.0749684	0.138773	0.0244737	-0.0322507	0.100452	0.105471	0.0255244	0.125866	0.136091	0.0604242	0.0954557	-0.0612521	0.00965491	0.129059	-0.00896238
cg24946795	0.301767	0.510656	0.496746	-0.173734	0.325642	-0.0374512	0.12985	0.424415	0.34901	0.29574	0.394515	0.559677	0.505683	0.57035	0.361411	0.341793	0.514139	0.461099	-0.122944	0.510339	0.266849	0.525333	-0.12757	0.488184	0.379532	0.381825	0.211548	0.491821	0.453551	0.519507	0.367544	0.176155	0.440664	0.608547	0.547022	0.342244	0.144601	-0.21323	0.489385	0.394045	0.348391	0.261408	0.250814	0.246095	0.349159	0.146951	0.505715	0.0822932	0.121238
cg27575217	0.320496	0.127555	0.166284	-0.059157	-0.00811294	-0.0429207	0.012712	0.138157	0.15005	0.0888582	0.157688	0.0856476	0.0464268	0.0792287	0.106376	0.026221	0.0788808	0.0108444	0.0798746	0.12393	0.0401058	0.0356758	-0.197512	0.107894	-0.0342322	0.0993079	-0.131653	0.20539	0.00915208	0.0450395	0.0148555	0.0303138	0.0936066	0.159159	0.12422	0.0722587	0.0541135	-0.213248	-0.0369085	0.0465059	0.0226794	0.0369494	0.0873964	0.088132	0.0206034	0.0561777	0.0139003	-0.0846247	-0.0660878
cg04305621	-0.0223181	-0.331523	-0.4509	0.39734	-0.292748	0.00537471	-0.0556774	-0.319684	-0.44183	-0.387145	-0.369471	-0.383138	-0.238422	-0.376152	-0.120185	-0.331833	-0.36283	-0.115664	-0.172553	-0.324947	-0.127974	-0.215277	0.298825	-0.305986	-0.351733	-0.387708	-0.267172	-0.0256721	-0.210192	-0.164877	-0.0728914	-0.174517	-0.277924	-0.371707	-0.444391	-0.313805	-0.390117	0.497596	-0.337936	-0.388331	-0.502628	-0.330772	-0.28687	-0.249811	-0.189871	-0.324187	-0.0430161	-0.186579	-0.0417177
cg04529938	-0.15307	-0.513046	-0.628172	0.448225	-0.404888	0.0751054	-0.252805	-0.464427	-0.637448	-0.577078	-0.576837	-0.60598	-0.362949	-0.590857	-0.29225	-0.385976	-0.643183	-0.387322	-0.250438	-0.496496	-0.237609	-0.42787	0.353109	-0.567153	-0.508674	-0.526211	-0.44222	-0.246441	-0.381135	-0.379305	-0.244345	-0.367745	-0.425101	-0.641663	-0.62426	-0.438829	-0.460382	0.515361	-0.553057	-0.522953	-0.650199	-0.524468	-0.416541	-0.439898	-0.405897	-0.440651	-0.283732	-0.343658	-0.131152
cg06594281	0.214803	-0.176157	-0.269808	0.272303	-0.268546	0.0972244	0.168313	-0.157865	-0.156965	-0.142061	-0.15168	-0.127803	-0.155872	-0.261986	0.193078	-0.0940497	-0.0633123	0.264582	0.15894	-0.269931	-0.0428182	0.0326417	0.275937	0.0535955	-0.172121	-0.258882	-0.118565	0.178736	-0.012578	-0.108567	0.078438	0.0722944	-0.216921	-0.118465	-0.216668	-0.0786954	-0.0980338	0.505991	-0.0959648	-0.197012	-0.222421	-0.185298	-0.219254	0.046157	-0.102708	-0.132284	0.228432	-0.0829306	-0.000152694
cg09300114	-0.0374126	-0.299873	-0.42388	0.324297	-0.304746	-0.00243446	-0.0576267	-0.281425	-0.426271	-0.404599	-0.348251	-0.366892	-0.213575	-0.332242	-0.115211	-0.321741	-0.357623	-0.105061	-0.184746	-0.32029	-0.119643	-0.207938	0.259779	-0.282957	-0.3354	-0.373539	-0.27164	-0.048421	-0.18298	-0.180234	-0.0709425	-0.166749	-0.284956	-0.375677	-0.415235	-0.281289	-0.414348	0.483211	-0.331137	-0.362121	-0.460649	-0.306986	-0.282178	-0.237134	-0.157333	-0.310598	-0.0576917	-0.245902	-0.0468706
cg10829727	-0.01833	-0.261691	-0.379807	0.2478	-0.182718	-0.0658372	-0.0146215	-0.218217	-0.336152	-0.247137	-0.260348	-0.296311	-0.183047	-0.308657	-0.0572171	-0.26179	-0.286346	-0.0657029	-0.08654	-0.281231	-0.0828963	-0.147179	0.161727	-0.23231	-0.294818	-0.307117	-0.213205	-0.00502927	-0.155971	-0.153692	-0.0210724	-0.106707	-0.200859	-0.30701	-0.362048	-0.252013	-0.36448	0.493179	-0.287767	-0.298389	-0.416242	-0.244526	-0.219555	-0.155222	-0.092876	-0.247327	-0.0096762	-0.200322	-0.0100178
cg13424870	0.21288	-0.0838442	-0.0824131	0.0455043	-0.0883274	-0.0264118	0.241937	-0.0490211	0.0337813	-0.022255	-0.0627781	-0.00456658	-0.0407877	-0.0894343	0.204326	0.0201257	0.0856046	0.287693	0.0864909	-0.0944167	-0.0130739	0.119094	0.0958084	0.152374	-0.0760703	-0.0346858	-0.0449939	0.354422	0.146714	0.0440832	0.133774	0.1552	-0.124523	0.0104069	-0.14493	0.00278333	-0.0055949	0.218068	-0.0315767	-0.097494	-0.0923188	-0.0791097	-0.06893	0.0725444	-0.00408793	-0.0615534	0.34161	-0.0347151	0.0376765
cg15190451	0.057743	-0.583998	-0.566555	0.232543	-0.265781	0.13525	-0.27111	-0.458765	-0.443448	-0.365779	-0.377633	-0.523299	-0.123785	-0.454728	-0.250832	-0.0981848	-0.496973	-0.232614	-0.107681	-0.496706	-0.33223	-0.297905	0.352436	-0.452422	-0.378036	-0.413417	-0.515	-0.100888	-0.204004	-0.27533	-0.0269496	-0.405808	-0.0894017	-0.470281	-0.39064	-0.572296	-0.284916	0.149803	-0.326563	-0.40024	-0.418533	-0.632495	-0.323576	-0.337595	-0.338552	-0.220945	-0.0653769	-0.450977	0.0393845
cg17733616	0.279909	-0.116401	-0.107934	0.048877	-0.126909	0.0188594	0.270082	-0.0829418	0.0344844	-0.0185486	-0.0182078	-0.00456368	-0.0285044	-0.113264	0.223791	0.0463906	0.103941	0.360234	0.166173	-0.145735	-0.036372	0.162089	0.132639	0.162927	-0.0383034	-0.0747694	-0.0227249	0.373323	0.120068	0.066084	0.196803	0.194172	-0.0953453	0.0301722	-0.118608	-0.0551592	-0.0158675	0.250563	0.0243177	-0.0911188	-0.0630902	-0.0966734	-0.0859443	0.101541	0.012675	0.0102918	0.389458	-0.0179498	0.0459455
cg17749454	0.108779	0.371011	0.525412	-0.536232	0.307196	-0.373499	0.264278	0.335572	0.502761	0.341476	0.455055	0.471687	0.369873	0.586074	0.186377	0.427252	0.510419	0.234275	-0.00900045	0.466948	0.287356	0.344562	-0.310706	0.363462	0.573433	0.42421	0.307125	0.303245	0.3805	0.446468	0.321708	0.266504	0.38872	0.550064	0.420996	0.344981	0.299865	-0.645815	0.448154	0.425594	0.599781	0.409681	0.327079	0.324839	0.341272	0.404696	0.283664	0.30455	0.271044
cg21306329	0.324626	-0.134077	-0.108307	0.0474465	-0.141087	-0.0117055	0.261666	-0.0899954	0.0363278	-0.00779387	-0.00760258	-0.00819257	-0.0428964	-0.127457	0.200488	0.0609677	0.0777684	0.347255	0.179302	-0.163137	-0.0373558	0.159956	0.120102	0.133139	-0.0183113	-0.0657493	-0.0369128	0.363285	0.131454	0.0546166	0.19818	0.182832	-0.0819641	0.027841	-0.113722	-0.0688469	-0.0125957	0.239811	0.0206	-0.0666714	-0.0328752	-0.137656	-0.113705	0.119907	0.00166237	-0.0138305	0.364173	-0.0377499	0.0312884
cg21853806	0.136155	0.0220403	-0.0901325	0.0293093	0.072273	0.0920913	0.196196	0.0149757	-0.0111549	0.0693079	0.117404	0.0518025	0.159828	0.0406358	0.17069	-0.0973255	0.115901	0.0844239	0.0553554	0.0481287	-0.148847	0.167874	-0.00895327	0.0274316	-0.0129315	-0.0183427	0.0676994	0.179416	-0.0638744	0.057595	0.204423	0.10918	0.152238	0.116609	0.0675548	-0.159798	-0.122711	0.00949167	0.137517	-0.0492829	-0.0752743	0.150519	0.176861	0.0441744	0.0263205	0.0739027	0.112553	0.0881371	0.100067
cg24328816	0.123528	0.0942739	0.118808	0.0344575	0.212056	-0.0995019	0.248358	-0.0512187	0.218539	0.204586	0.143545	0.0584347	0.314673	0.228602	-0.0320533	0.10095	0.188043	0.128164	-0.213894	0.192298	0.0908603	0.2677	-0.0678799	0.160534	0.0859385	0.153069	-0.00750444	0.348161	0.223292	0.262316	0.29746	0.179598	0.22447	0.230177	0.187428	-0.0214797	-0.109419	-0.305742	0.0937552	0.0883941	0.115396	0.0478442	0.203057	0.0236626	0.110203	0.202615	0.245409	0.0331505	0.185123
cg27619475	0.322759	-0.117247	-0.135081	0.0526981	-0.138257	-0.0337002	0.286001	-0.0779914	0.0259341	-0.0134057	0.0105136	0.0101095	-0.0415168	-0.13087	0.214789	0.0484234	0.0755992	0.347188	0.20331	-0.174929	-0.0148328	0.169038	0.14062	0.120218	-0.0104889	-0.0721589	-0.0149275	0.345438	0.116801	0.0370514	0.192168	0.195904	-0.0569817	0.0266247	-0.103851	-0.0673064	-0.00951369	0.268596	0.037177	-0.0685928	-0.0310723	-0.133531	-0.122868	0.145144	0.00454893	0.0122722	0.354349	-0.0253199	0.054063
cg03306221	-0.0112603	-0.193506	-0.192825	0.213039	-0.253984	-0.0928208	-0.0390186	-0.201805	-0.19817	-0.179628	-0.129745	-0.155655	-0.180999	-0.239907	-0.139184	0.0198703	-0.229652	-0.161984	-0.134803	-0.177205	-0.0491794	-0.190201	0.135351	-0.17169	-0.0691236	-0.148741	-0.211546	-0.173437	-0.301947	-0.0656416	-0.140534	-0.119535	-0.204409	-0.183955	-0.216611	-0.0550912	0.131775	-0.0424817	-0.114979	-0.125952	-0.0593976	-0.196824	-0.144197	-0.108996	-0.205171	0.0473849	-0.145567	-0.185018	0.0332858
cg05472874	-0.0747341	-0.0970358	-0.161914	0.399175	-0.0164102	-0.0212637	-0.000636864	-0.137714	-0.120095	-0.129061	-0.230357	-0.165611	0.009724	-0.0859669	-0.218211	-0.147926	-0.132661	-0.080072	-0.306243	0.00421376	-0.171285	-0.0396659	0.140315	-0.119622	-0.0437574	-0.119855	-0.0881258	-0.130826	-0.0536933	0.0256701	-0.0452795	-0.0268759	-0.0790585	-0.064422	-0.113814	-0.0585544	-0.0226052	-0.103348	-0.0583347	-0.106742	-0.147265	-0.131256	-0.11964	-0.113499	-0.170845	-0.117875	-0.0269237	-0.135253	0.0949849
cg10836392	0.0114303	-0.157894	-0.19333	0.161839	-0.297155	-0.0762654	-0.158751	-0.0431913	-0.326741	-0.424886	-0.278228	-0.180307	-0.231914	-0.169671	-0.203288	-0.137235	-0.280625	-0.191818	-0.172584	-0.18421	-0.0222735	-0.212461	0.138691	-0.26063	-0.129811	-0.196011	-0.148118	-0.131255	-0.24249	-0.201521	-0.204378	-0.237392	-0.215123	-0.247908	-0.19099	-0.0638613	-0.0157062	-0.0484535	-0.172934	-0.121598	-0.183485	-0.221416	-0.237836	-0.130577	-0.134806	-0.147799	-0.179922	-0.179898	-0.146249
cg10894483	0.106193	-0.148701	-0.129984	0.112548	-0.0942877	0.0172661	0.0579549	-0.0326628	-0.0726411	-0.135864	-0.099993	-0.0524995	-0.0648332	-0.126253	-0.0686569	-0.0509877	-0.0499562	0.0241047	-0.0890063	-0.096204	-0.147671	0.00396661	0.147225	-0.0909982	0.0377013	-0.0192452	-0.00820093	-0.0702694	-0.0336054	-0.0234442	-0.0414816	-0.0391052	-0.0204397	-0.0205106	-0.151882	-0.0213919	0.062704	0.000573458	0.022943	-0.0844946	-0.0417619	-0.0833667	-0.150209	0.0254224	-0.0777481	0.0744021	0.0604151	-0.0320777	0.0690283
cg14946113	0.108148	0.179754	0.158051	-0.111593	0.128825	0.0828989	0.155179	0.246471	0.112832	0.112563	0.25332	0.248651	0.153129	0.216149	0.2132	0.146759	0.233994	0.205056	0.15997	0.211241	0.0550448	0.208114	-0.00507313	0.216061	0.156451	0.0457845	0.137238	0.178615	0.124244	0.14391	0.193917	0.112766	0.12463	0.192548	0.195767	0.151988	0.16467	-0.0106191	0.240823	0.138252	0.221432	0.242444	0.144553	0.151691	0.204579	0.228905	0.15775	0.118944	0.137721
cg15471953	-0.12027	-0.0882105	-0.133345	0.147607	-0.205279	-0.0166131	-0.132166	-0.130624	-0.22844	-0.216905	-0.150607	-0.136603	-0.199203	-0.132855	-0.109563	-0.0486221	-0.18346	-0.184041	-0.0768271	-0.165633	-0.0894436	-0.174937	0.055341	-0.217144	-0.126296	-0.146168	-0.0579441	-0.292309	-0.185221	-0.129452	-0.221395	-0.162743	-0.194224	-0.164434	-0.165112	0.00745914	-0.0282073	-0.0138929	-0.123363	-0.156377	-0.105893	-0.141439	-0.158543	-0.20974	-0.187521	-0.0912692	-0.184976	-0.0614713	-0.0628723
cg21925310	-0.00886929	-0.168694	-0.0776361	0.132276	-0.155853	0.0336935	-0.0526524	-0.0289055	-0.0975362	-0.163008	-0.0385035	-0.0750503	-0.198607	-0.139894	-0.0706614	0.00871785	-0.0941397	-0.0371307	-0.0570746	-0.0614145	-0.134807	-0.15781	0.0781073	-0.0567614	0.0249198	-0.0211634	-0.0936344	-0.0699178	-0.112735	-0.0420118	-0.141127	-0.0801092	-0.134117	-0.0690613	-0.190763	0.0294857	0.0916758	0.01726	-0.0415051	-0.0533748	-0.0546286	-0.0825677	-0.063327	-0.0695888	-0.0931166	-0.0306578	-0.0370774	-0.114439	-0.0199384
cg23933503	0.204089	0.274216	0.298954	-0.34559	0.157501	-0.406217	0.183544	0.165572	0.226734	0.350578	0.247796	0.231822	0.148407	0.357571	0.185871	0.285879	0.325676	0.334482	0.228801	0.219161	0.150373	0.246046	0.0149084	0.251616	0.386598	0.250903	0.193867	0.217906	0.321195	0.305636	0.161926	0.224761	0.178661	0.360819	0.324694	0.126343	0.236004	-0.580868	0.268111	0.296159	0.291585	0.235745	0.135557	0.138247	0.175357	0.239342	0.208747	0.178671	0.177627
cg27501458	0.0430722	-0.258435	-0.340355	0.21221	-0.384217	0.0186508	-0.196227	-0.193252	-0.406192	-0.422039	-0.247977	-0.269583	-0.223488	-0.33122	-0.195957	-0.0107008	-0.329356	-0.222524	-0.0568727	-0.34979	-0.123584	-0.238143	0.268034	-0.28048	-0.101277	-0.273895	-0.243208	-0.301994	-0.311849	-0.260093	-0.182032	-0.243814	-0.277696	-0.335179	-0.273584	-0.139177	-0.0062357	0.105779	-0.122882	-0.25836	-0.194007	-0.324438	-0.238121	-0.215806	-0.321148	-0.0485861	-0.197697	-0.258569	0.00668693
cg00418828	0.00560785	0.214229	0.283602	-0.0170139	0.256219	-0.00829352	0.205266	0.150939	0.352781	0.25653	0.289328	0.262261	0.236042	0.334318	0.0352499	0.143482	0.372511	0.136138	-0.0730092	0.297465	0.132888	0.254339	-0.17863	0.272242	0.241139	0.289723	0.233846	0.26514	0.290722	0.351533	0.204012	0.244595	0.318619	0.310995	0.234414	0.112341	0.0101915	-0.158275	0.224604	0.133279	0.211901	0.211204	0.19563	0.226896	0.325143	0.238266	0.240698	0.210726	0.128647
cg04013592	0.234866	0.484708	0.653846	-0.202257	0.38466	-0.068258	0.374316	0.553151	0.639027	0.475889	0.614964	0.595227	0.44452	0.596506	0.305641	0.196984	0.723782	0.460163	0.0652183	0.589041	0.259702	0.528088	-0.389002	0.597323	0.449774	0.515334	0.465649	0.480506	0.433972	0.519565	0.428306	0.50752	0.568443	0.750704	0.520512	0.46757	0.126849	-0.344509	0.498966	0.407174	0.487188	0.46019	0.480061	0.517764	0.687384	0.407786	0.39603	0.402792	0.0558027
cg04785972	-0.0355135	-0.248133	-0.419656	0.142503	-0.337462	0.284751	-0.0408201	-0.246228	-0.385554	-0.298738	-0.246059	-0.276477	-0.249118	-0.326167	0.0529263	-0.149093	-0.234431	0.0936865	0.199873	-0.439889	-0.245055	-0.121262	0.112669	-0.192117	-0.265302	-0.421089	-0.0285787	-0.181143	-0.219028	-0.347716	-0.149563	-0.138961	-0.19048	-0.237783	-0.191445	-0.349084	-0.261464	0.232337	-0.160107	-0.305576	-0.325919	-0.399002	-0.331153	-0.227636	-0.365438	-0.115213	-0.090726	-0.0823512	0.00223889
cg05529886	0.246069	0.0317295	0.161208	-0.0968559	-0.0498103	-0.1112	-0.0461883	-0.00444064	0.0379168	0.0935226	0.0781986	0.0421065	0.0738374	0.0751586	0.12725	0.0603468	0.154787	0.293386	0.0296608	-0.0243905	0.0496952	0.207878	-0.164311	0.0030863	-0.0774295	0.0283515	0.249519	0.147268	0.263634	0.0411007	0.134671	-0.027472	0.143034	0.206221	0.185601	0.0270459	-0.201811	-0.130765	0.0691042	-0.0874893	0.039265	-0.147724	-0.0916469	0.242794	0.0770347	-0.066277	0.104864	0.148964	-0.0227016
cg06185146	0.0723944	0.334027	0.55741	-0.227206	0.380823	-0.0680959	0.370265	0.251339	0.524864	0.539204	0.467506	0.417929	0.366253	0.490612	0.112046	0.277459	0.532028	0.268877	0.0103987	0.447218	0.145689	0.397915	-0.349927	0.434357	0.32237	0.40553	0.328995	0.464117	0.436672	0.501702	0.343261	0.368776	0.418556	0.540075	0.400748	0.265413	0.199998	-0.465566	0.385999	0.407746	0.422742	0.36956	0.333272	0.348851	0.400497	0.250727	0.357939	0.287992	0.0930833
cg06314761	0.159843	-0.157209	-0.291469	0.142479	-0.378956	0.135962	0.0160007	-0.119646	-0.304055	-0.202755	-0.103414	-0.135203	-0.13881	-0.230522	0.159801	-0.0477765	-0.103174	0.221663	0.246807	-0.332839	-0.17778	-0.0196583	0.193206	-0.000746103	-0.144815	-0.284617	-0.0196047	-0.0710812	-0.104414	-0.257326	-0.0281781	-0.0250527	-0.116844	-0.068462	-0.0642382	-0.194134	-0.0600265	0.180613	-0.000817809	-0.182907	-0.0839776	-0.285361	-0.26583	-0.140229	-0.218581	-0.0479801	0.0486618	-0.140714	0.038573
cg08536228	-0.111955	-0.208841	-0.121372	0.153493	-0.0723005	-0.111749	-0.108217	-0.050501	-0.197551	-0.0724149	-0.248357	-0.172024	-0.215523	-0.173645	-0.241384	-0.263933	-0.155948	-0.148663	-0.110609	-0.0652195	-0.172433	-0.202478	0.157065	-0.154857	-0.0439538	-0.040809	-0.0525159	-0.27923	-0.105188	-0.190212	-0.264903	-0.227104	-0.142388	-0.14741	-0.126142	0.0407762	0.101115	-0.11667	-0.150849	-0.102829	-0.119601	-0.00173475	-0.168722	-0.0651716	-0.205199	-0.0204825	-0.213206	-0.0868682	-0.0517635
cg09462808	-0.00439004	-0.139138	-0.27804	0.102855	-0.228454	0.31305	-0.0389044	-0.00799194	-0.274032	-0.222648	-0.213113	-0.165064	-0.16985	-0.21806	0.105909	-0.0664362	-0.149537	0.204174	0.223647	-0.265204	-0.141626	-0.109281	0.167708	-0.033949	-0.139103	-0.27463	0.0108881	-0.0702354	-0.138547	-0.275192	-0.0880985	-0.124232	-0.14827	-0.11493	-0.103917	-0.184566	-0.0658688	0.235828	-0.0882938	-0.13473	-0.160877	-0.242447	-0.205	-0.137897	-0.248038	-0.148797	-0.0234964	-0.0328618	0.0166667
cg11238995	0.0398722	0.326482	0.432192	-0.164995	0.449104	-0.00799256	0.30885	0.186953	0.542474	0.565734	0.352629	0.363355	0.350252	0.459145	0.195148	0.206691	0.465342	0.245816	-0.0135864	0.40868	0.205971	0.32786	-0.229824	0.384573	0.274999	0.378895	0.3035	0.398348	0.388504	0.392085	0.265935	0.311427	0.429092	0.469244	0.328903	0.202082	0.214999	-0.353316	0.281562	0.392501	0.329468	0.360366	0.333198	0.31489	0.36657	0.281242	0.339698	0.308832	0.179079
cg11282156	0.0290511	0.203752	0.466099	-0.151706	0.329102	0.0299731	0.173276	0.108166	0.479456	0.281299	0.26776	0.287998	0.341086	0.426924	-0.0463512	0.256105	0.414773	0.160483	-0.223002	0.365172	0.036932	0.235375	-0.244967	0.321541	0.19458	0.31029	0.187918	0.392949	0.330682	0.400222	0.27491	0.163422	0.319916	0.385879	0.259158	0.188458	0.133361	-0.35524	0.266642	0.253974	0.315612	0.202793	0.250672	0.270047	0.317318	0.215858	0.331162	0.219974	0.126836
cg11876912	0.209752	0.465075	0.68806	-0.440047	0.471639	0.0147182	0.357095	0.524398	0.732285	0.481595	0.637871	0.5935	0.477023	0.629573	0.250621	0.263389	0.719605	0.452043	0.023717	0.594715	0.215012	0.50506	-0.485289	0.595585	0.455289	0.543287	0.452197	0.549461	0.524126	0.530099	0.447158	0.433108	0.537915	0.704641	0.542424	0.400207	0.162351	-0.367225	0.512204	0.47908	0.547596	0.438911	0.495738	0.495375	0.673912	0.427063	0.439027	0.341501	0.0936874
cg14183384	0.0290927	-0.0519171	-0.154749	0.175399	-0.10232	0.00606374	-0.0560563	-0.0857648	-0.171761	-0.37668	-0.256482	-0.182073	-0.126605	-0.0575515	-0.134431	-0.254486	-0.202156	-0.198322	-0.229108	-0.115789	0.148201	-0.142703	-0.00549656	-0.147673	-0.197233	-0.164357	-0.117546	0.0635	-0.10567	-0.172537	-0.143944	-0.0649893	-0.0879299	-0.2137	-0.14908	-0.104555	-0.0943033	-0.0377927	-0.197984	-0.00205791	-0.236373	-0.215026	-0.125669	-0.0765054	0.0997359	-0.162377	-0.100518	-0.136436	-0.195264
cg15056773	-0.0610898	-0.259188	-0.335912	0.123861	-0.258409	0.0234357	-0.235335	-0.248335	-0.324821	-0.447824	-0.293207	-0.258464	-0.257679	-0.242803	-0.144114	-0.162148	-0.340475	-0.18286	-0.0920598	-0.288565	-0.160639	-0.24715	0.157783	-0.28598	-0.131377	-0.290363	-0.20909	-0.27926	-0.274378	-0.223706	-0.204759	-0.209793	-0.303689	-0.365042	-0.283123	-0.17436	-0.153978	0.294698	-0.274091	-0.272174	-0.224442	-0.297015	-0.229243	-0.263506	-0.307917	0.00432176	-0.161442	-0.228955	0.0209139
cg15559684	0.118426	0.214679	0.408386	-0.17873	0.363508	-0.129538	0.342487	0.124263	0.485628	0.446071	0.319343	0.268626	0.346594	0.413693	0.0568908	0.244876	0.417007	0.229682	-0.130733	0.334996	0.191398	0.306627	-0.236427	0.322471	0.263012	0.341206	0.258216	0.414049	0.370061	0.407363	0.311439	0.272739	0.374576	0.411311	0.245626	0.159204	0.174548	-0.5095	0.28798	0.336437	0.343277	0.234633	0.254491	0.335839	0.325619	0.308292	0.337088	0.219288	0.223915
cg15772216	0.28873	0.0515624	0.115708	-0.0177469	-0.0524133	-0.0891681	-0.0411664	0.167887	-0.0383511	-0.0359661	0.0492755	0.0177326	-0.0051483	0.0581217	0.149754	-0.012254	0.0801061	0.176303	0.134583	0.066194	0.0165405	0.0460637	-0.0895398	-0.0185717	-0.0165755	0.0552391	0.14425	0.0576099	0.00712146	-0.0854653	0.0517085	-0.15606	0.160837	0.177765	0.190585	0.0917142	-0.0830488	-0.141227	0.0339711	-0.0935431	0.0502778	-0.0851209	-0.0343793	0.13277	0.0247874	0.0280107	-0.0552957	0.092154	-0.0572259
cg15954675	0.113937	0.444525	0.530232	-0.200204	0.32551	-0.0300016	0.29017	0.411008	0.500207	0.406367	0.452975	0.467988	0.317607	0.516391	0.259098	0.00268533	0.5692	0.407828	-0.0502715	0.483516	0.361909	0.377652	-0.408657	0.534386	0.235915	0.363475	0.359466	0.377195	0.302971	0.335311	0.262377	0.327576	0.439568	0.574521	0.481928	0.365266	0.0534368	-0.201426	0.308973	0.368052	0.331819	0.385977	0.327199	0.416013	0.494335	0.280252	0.308469	0.284614	-0.0653306
cg19467202	0.0714018	0.180181	0.349567	-0.0431216	0.306774	0.0344278	0.168005	0.060232	0.350612	0.366023	0.258038	0.224794	0.311257	0.377398	0.016325	0.200297	0.327874	0.0741927	-0.245394	0.292809	0.118312	0.237388	-0.171435	0.212884	0.174045	0.202148	0.120688	0.322897	0.407412	0.31897	0.198622	0.0451776	0.329633	0.318682	0.24503	0.104199	0.148203	-0.355	0.25693	0.297817	0.263255	0.20569	0.142506	0.156604	0.220418	0.134316	0.299397	0.136646	0.137752
cg22076422	0.229423	0.272498	0.287616	-0.116103	0.253148	0.0224297	0.167969	0.256619	0.238801	0.370855	0.361491	0.364481	0.325248	0.346568	0.239597	0.237658	0.428832	0.342025	0.0766331	0.202547	0.083236	0.248491	-0.0290525	0.293706	0.289983	0.173932	0.220108	0.246181	0.394687	0.293493	0.243677	-0.0425409	0.347186	0.416229	0.38236	0.149526	0.163322	-0.234	0.424046	0.191961	0.261595	0.202623	0.0912833	0.180477	0.28019	0.173569	0.325516	0.277351	0.238957
cg22189386	0.0216433	-0.233029	-0.358101	0.220575	-0.230685	0.0365194	0.0179066	-0.208396	-0.329304	-0.21899	-0.256868	-0.250789	-0.232601	-0.355686	0.0402589	-0.259732	-0.163975	0.0478089	0.200007	-0.343489	-0.222433	-0.0863153	0.164614	-0.217758	-0.25555	-0.297348	0.0580966	-0.152744	-0.177999	-0.300097	-0.113462	-0.0949007	-0.0596068	-0.125637	-0.15084	-0.287764	-0.335477	0.141872	-0.100255	-0.36447	-0.37889	-0.283427	-0.293348	-0.11145	-0.2261	-0.133653	-0.137067	0.0864477	-0.00314756
cg23430388	-0.000931107	0.251301	0.501353	-0.196417	0.386336	-0.0535193	0.250085	0.177288	0.549636	0.519193	0.392067	0.349621	0.335651	0.420526	0.0624016	0.301839	0.496154	0.173887	-0.110801	0.425407	0.13332	0.31842	-0.304756	0.366414	0.295779	0.381695	0.30701	0.319223	0.38154	0.412248	0.283151	0.265692	0.374018	0.467121	0.277013	0.234262	0.151849	-0.420231	0.318884	0.322418	0.363122	0.339352	0.319909	0.304312	0.292394	0.377268	0.295805	0.295406	0.202198
cg25854303	0.199261	-0.0692951	-0.122874	0.0743881	-0.230849	-0.0210685	-0.0416968	-0.0160716	-0.151243	-0.0900497	-0.0465622	-0.0423313	-0.0448313	-0.0971196	0.0689292	0.0479914	-0.0655413	0.0231366	0.0774968	-0.181463	-0.0579728	-0.020461	-0.0550232	-0.0164267	-0.0421899	-0.228786	-0.11931	-0.0512999	-0.0900447	-0.0619542	0.0258168	-0.0711475	-0.153139	-0.0366734	0.00650506	0.041843	0.00264865	0.0226146	-0.0565374	-0.117579	0.00627299	-0.0985368	-0.0716236	0.00530676	-0.065569	-0.0836446	-0.0319062	-0.214138	-0.103532
cg25934371	-0.0405006	0.125869	0.240191	0.10164	0.114964	0.0189179	0.166376	-0.128465	0.248272	0.247578	0.101645	0.108243	0.193324	0.238254	0.028456	0.207871	0.106118	-0.027073	-0.251149	0.179473	0.0734306	0.105864	-0.0679782	0.0982622	0.0571878	0.0589148	-0.0830256	0.184728	0.275609	0.293308	0.156273	0.10498	0.0886227	0.106829	0.0876398	0.112642	0.125161	-0.318655	0.00492419	0.14234	0.185878	0.0975354	0.0319827	0.109249	0.0214845	0.0842594	0.11599	-0.0654788	0.0139638
cg27516221	0.276287	0.499033	0.671062	-0.427522	0.431042	-0.0128014	0.352515	0.550531	0.652686	0.397244	0.623818	0.633639	0.456671	0.619023	0.295101	0.228239	0.709174	0.467107	0.0242541	0.624133	0.25296	0.525562	-0.474406	0.573545	0.473583	0.544	0.452838	0.4938	0.494611	0.568742	0.455791	0.418746	0.519712	0.731861	0.548953	0.467946	0.155169	-0.322043	0.550126	0.419489	0.547799	0.479257	0.453327	0.500436	0.658354	0.407396	0.435159	0.361168	0.077164
cg00384707	0.0132992	0.267281	0.250748	-0.243506	0.0140088	-0.157055	0.273498	0.193161	0.142642	0.171084	0.216249	0.201114	0.105581	0.1632	0.133951	0.0523732	0.265376	0.257268	0.167886	0.170914	0.11881	0.257452	-0.23182	0.198599	0.115524	0.0820388	0.190163	0.238947	0.147751	0.203437	0.152955	0.248673	0.119644	0.314958	0.214726	0.202826	-0.0763478	-0.216425	0.163513	0.134907	0.0200591	0.261128	0.124632	0.224248	0.0658777	-0.0223059	0.128424	0.225133	-0.0898852
cg01557648	-0.123294	0.00771473	0.118989	-0.125577	0.0832145	0.0408095	0.101126	0.154607	0.117837	0.0369506	0.118786	0.0977762	0.170152	0.127783	-0.115719	0.0256099	0.0991854	0.0371296	-0.145401	0.0953146	0.00401658	0.00500166	-0.10409	0.175082	0.117944	0.149749	0.0130413	0.00359012	0.0826252	0.00834325	0.0588773	-0.070101	0.0842102	0.0869047	0.0353454	0.186883	0.0473688	-0.135314	0.129418	0.0143995	0.147271	0.0863367	0.155772	0.0360114	0.0333082	0.0451117	0.0342249	0.0194044	0.055686
cg02505267	0.107087	0.0935202	0.164706	-0.475825	-0.000460042	-0.0662946	0.126066	0.168181	0.107896	0.0654737	0.166098	0.122475	0.0911355	0.0534393	0.105664	0.104058	0.159231	0.101201	0.0814927	0.0890445	0.121028	0.107008	-0.33469	0.138966	-0.0334611	0.110273	0.0746655	0.166698	0.100639	0.0410084	0.0947836	0.0664331	0.0967	0.168905	0.120502	0.104657	0.00329567	-0.22093	0.126296	0.10854	0.129051	0.10223	0.0913835	0.146237	0.148007	-0.01545	0.0312447	0.0775078	-0.103315
cg03324821	-0.0194657	0.0125223	0.162969	-0.0218408	0.122146	0.0134305	-0.0064156	0.029985	0.187107	0.13257	0.166049	0.133853	-0.00779186	0.131884	-0.0565196	0.0341316	0.170902	0.0280003	-0.0601739	0.0786515	0.169469	0.0650349	-0.0802809	0.185033	0.063882	0.114026	0.120596	0.105609	0.163281	0.063111	0.0207184	0.0775967	0.00735577	0.107247	0.0551575	0.151353	0.0515071	-0.147537	0.101881	0.0959474	0.100575	0.0582275	0.203764	0.101031	0.121542	0.118444	0.046277	0.0947668	0.0752324
cg06440519	0.0785855	0.0517723	-0.0800338	0.0724703	-0.0232149	0.115515	0.155225	-0.0116948	-0.0405491	0.0278025	0.0976588	0.111122	0.0420018	-0.00318985	0.148137	0.0548239	0.0431192	0.172667	0.174599	-0.0845752	0.0150194	0.109093	0.0749073	-0.0587434	0.0332471	-0.115386	-0.00589942	0.0672605	-0.141623	0.104027	0.112958	0.00725274	0.0555374	0.0503695	0.10029	-0.0318073	-0.0596217	0.230052	0.154103	-0.0467517	-0.0389037	0.125441	0.0117143	0.0905131	-0.0657668	-0.00782715	0.0539998	0.0646703	0.0642539
cg06723512	-0.0788294	-0.0573447	-0.112701	-0.0176359	-0.191044	-0.0913616	-0.0890652	-0.0508762	-0.15129	-0.409244	-0.246633	-0.180012	-0.0886677	-0.0468208	-0.123192	-0.207877	-0.199569	-0.225657	-0.263207	-0.0752077	0.134945	-0.129007	-0.0667705	-0.191655	-0.15988	-0.152123	-0.130225	0.0911944	-0.121802	-0.1619	-0.0973422	-0.0734977	-0.131734	-0.190919	-0.156015	-0.110213	-0.18328	-0.0592555	-0.221363	-0.0135617	-0.190199	-0.169606	-0.109669	-0.145011	0.106379	-0.207089	-0.112331	-0.138109	-0.251305
cg06732870	0.0204479	0.0588246	0.0242847	0.082094	0.0909878	0.154125	-0.0953875	0.0296906	-0.0212947	0.0645585	0.0967132	0.0302256	0.00300377	0.0481413	0.00722728	0.0242291	0.0294082	-0.0154766	0.11743	-0.0274429	-0.0508301	0.0326049	0.0355305	-0.0163715	-0.115674	0.0775765	0.110945	0.0976418	0.141387	0.048882	0.00190355	-0.0899252	0.0959874	0.064173	0.0465814	-0.19702	0.0728082	0.0113049	0.113225	0.100633	-0.00775253	0.00179461	0.0298404	-0.0781762	0.0780493	-0.0800719	0.0818915	0.172319	0.0811582
cg07951301	-0.015266	0.137786	0.0267723	-0.0578621	-0.0388846	-0.0227731	-0.159704	0.319561	-0.111359	0.0757051	0.0826958	0.193687	-0.103362	-0.0169539	0.235708	-0.0054142	0.00271425	0.175971	0.325554	0.0250879	-0.0541804	-0.0281211	0.125396	0.0783694	0.0759775	-0.01402	0.0506199	-0.152184	0.0162777	-0.0554509	-0.191128	-0.122247	-0.0804211	0.0118971	0.110281	0.10513	0.184853	0.176582	0.124452	0.0868233	0.0617451	0.170078	-0.12433	-0.0462921	0.0391399	-0.0428565	0.0301144	0.104187	-0.00328139
cg11500774	-0.0297221	-0.0788033	-0.243457	0.224282	-0.126067	0.323975	-0.132938	-0.182888	-0.243062	-0.304268	-0.319573	-0.23925	-0.133318	-0.186998	-0.105816	-0.239205	-0.188873	-0.156665	-0.200478	-0.217021	-0.0381711	-0.200114	0.0729215	-0.202142	-0.187173	-0.248374	-0.124755	-0.0681252	-0.22874	-0.151153	-0.162234	-0.174306	-0.180123	-0.234232	-0.184755	-0.17886	-0.276382	0.296992	-0.218456	-0.235517	-0.329866	-0.219921	-0.195742	-0.186403	-0.167696	-0.308876	-0.122807	-0.0964646	-0.236584
cg11867671	0.103043	0.108242	0.049222	0.0330416	-0.0768338	0.0550211	0.0939391	0.169595	0.0464179	0.00911052	0.12693	0.147293	0.0920934	0.0596623	0.14285	-0.106373	0.188273	0.170364	0.0358678	0.131981	0.166008	0.170221	-0.150559	0.166286	0.0417134	-0.205633	0.105516	0.125502	-0.17139	0.079318	0.161448	0.160738	0.159153	0.200526	0.112862	0.0973747	-0.0931485	0.0505927	0.117689	0.00251728	-0.042253	0.076586	0.0966325	0.177173	0.139956	0.157596	0.0910549	0.11764	-0.150041
cg12980692	0.137866	-0.175666	-0.32987	0.071848	-0.143072	-0.0876641	0.00816188	-0.222255	-0.220272	-0.310269	-0.225558	-0.261715	-0.0100456	-0.189418	-0.148026	-0.120559	-0.281314	-0.212179	-0.0576457	-0.159773	-0.0130417	-0.091738	0.121453	-0.309508	-0.124825	-0.202519	-0.263925	-0.0415859	-0.222518	-0.140087	0.0695508	-0.133705	-0.0573672	-0.178005	-0.123595	-0.212684	-0.1608	0.0751306	-0.156483	-0.231834	-0.186393	-0.255001	-0.144416	-0.105303	-0.215257	-0.121095	-0.107221	-0.10852	0.103599
cg13674662	0.0703295	-0.0274237	0.00614829	-0.0148791	-0.0751839	0.0991105	0.173671	0.0511655	0.00253722	0.0430017	0.0779617	0.0438321	0.0151499	-0.0736174	0.103747	0.184534	0.00952311	-0.132086	-0.110388	-0.0822878	0.0591318	0.039507	0.00592783	-0.10407	0.0325749	0.0086419	-0.108261	0.0619484	0.123347	-0.0243336	-0.0205743	0.0185479	-0.0234731	-0.0338429	-0.0912965	0.000200301	0.144518	0.00866393	-0.00588076	0.0721319	0.0188971	0.0305881	-0.160275	0.0517644	0.0769932	-0.035623	0.00957756	-0.00856646	0.0234122
cg18118147	0.0371669	0.146882	0.299395	0.0989339	0.151427	-0.0840907	0.248946	-0.116363	0.359704	0.354458	0.333487	0.186803	0.229809	0.21684	0.0817544	0.192943	0.358802	0.09004	-0.078144	0.178797	0.00497567	0.261604	0.00138036	0.293659	0.21396	0.245746	0.209006	0.125135	0.213288	0.317308	0.246541	0.287551	0.216687	0.336965	0.151407	0.168258	0.231035	-0.330498	0.327859	0.142396	0.271115	0.174678	0.253195	0.28548	0.107148	0.400394	0.223615	0.169297	0.284843
cg19511590	-0.0717974	-0.0696386	-0.0912643	-0.0531812	-0.198004	-0.0960782	-0.0655708	-0.151337	-0.157335	-0.184666	-0.172033	-0.125311	-0.125198	-0.120961	-0.0711832	0.0299287	-0.210823	-0.134858	-0.11898	-0.134291	-0.00385671	-0.125832	0.0362582	-0.203392	-0.0896784	-0.131719	-0.150601	-0.108156	-0.124095	-0.124967	-0.116629	-0.147222	-0.162	-0.162927	-0.167152	-0.0100767	-0.0255496	-0.031628	-0.164872	-0.0342914	-0.0618995	-0.0384457	-0.109671	-0.184984	-0.17619	-0.121702	-0.121975	-0.090657	-0.0831284
cg20154003	0.193486	0.311459	0.312131	-0.354544	0.0667721	-0.196829	0.187769	0.137543	0.214425	0.304162	0.252709	0.211151	0.160707	0.352021	0.141503	0.149977	0.309406	0.299407	0.179987	0.138263	0.00626247	0.250621	-0.213687	0.244998	0.145292	0.145427	0.265903	0.154459	0.33549	0.279776	0.129511	0.157417	0.114713	0.359576	0.347666	0.102922	0.093747	-0.43464	0.236072	0.290403	0.222648	0.270487	0.068553	0.132791	0.122588	0.144946	0.189798	0.15304	0.0968832
cg25307796	0.155184	0.27796	0.242672	-0.14979	0.123337	-0.225531	0.226835	0.148262	0.237785	0.395465	0.237851	0.298475	0.145207	0.263049	0.251814	0.207023	0.342502	0.291815	0.111574	0.111939	0.103196	0.200141	-0.00909258	0.298701	0.284775	0.236367	0.229582	0.10393	0.285252	0.205678	0.09969	0.111603	0.143281	0.339471	0.307128	0.133424	0.257225	-0.371488	0.324314	0.253412	0.252995	0.253924	0.049081	0.225293	0.154496	0.29213	0.257285	0.207648	0.209884
cg25405145	-0.0965561	-0.139187	0.0168482	-0.000678157	0.177213	-0.0922221	0.249172	0.077386	0.208426	0.0558498	0.13638	0.0147623	0.176335	-0.0820871	-0.117167	0.0834032	0.0268839	-0.140372	-0.111606	0.133699	0.0268478	0.064281	-0.102488	-0.090732	0.0197908	0.20186	0.00871231	0.231648	-0.0087838	0.0749328	0.199832	0.124204	0.181384	0.0406876	-0.145597	-0.0322422	0.0732136	-0.0227132	0.0227374	-0.0569307	0.0702216	-0.1028	0.154567	0.0846879	0.131874	0.190711	0.044217	0.156551	0.1827
cg25722796	-0.00324672	0.0589661	-0.0740702	-0.105835	-0.217035	0.0401346	0.165659	-0.239377	0.0417223	-0.141908	0.0512618	-0.00407255	0.15923	0.0180529	0.0546304	0.0774982	-0.00702087	0.0374263	-0.0601389	-0.111306	0.0102027	0.178698	-0.142113	-0.0174634	-0.084881	-0.107766	-0.0412362	0.0664386	-0.0522152	0.0895532	0.169319	0.150924	-0.00223255	0.080639	0.115698	-0.0828357	-0.132768	-0.0357874	0.0652292	-0.0411549	0.0387607	-0.0405884	-0.00305223	-0.0519891	-0.180704	0.072916	0.0830647	-0.0801928	0.0282667
cg00730441	-0.210187	-0.184543	-0.24421	0.297592	-0.0957774	0.0659851	-0.45876	-0.102652	-0.345817	-0.301873	-0.458387	-0.318476	-0.471484	-0.350596	-0.245356	-0.5881	-0.359548	-0.3437	-0.180456	-0.130179	-0.0524107	-0.477481	0.123297	-0.208972	-0.410606	-0.124532	-0.113493	-0.331142	-0.305902	-0.413823	-0.544882	-0.393337	-0.33031	-0.394969	-0.416857	-0.0838256	-0.111159	0.299281	-0.414108	-0.365619	-0.434946	-0.176381	-0.228573	-0.245589	-0.267853	-0.365997	-0.269508	-0.139881	-0.246311
cg01141580	0.225379	0.07071	-0.0495802	0.0929201	-0.173143	-0.0184506	0.11862	0.130573	-0.0513273	-0.171751	-0.0415987	0.0907349	0.0545444	0.0818325	0.155986	-0.0311695	0.0529924	0.102269	0.0633651	0.0402206	0.220604	0.105926	0.0890554	0.0451984	-0.0047172	-0.157559	-0.113919	0.172884	0.0147218	-0.131939	0.0793621	0.0633532	0.103046	0.111349	0.124402	0.0621546	-0.0561888	0.00491382	0.00701515	0.0431378	-0.0505065	-0.00109519	-0.136556	0.0932945	-0.00238369	0.00625514	0.118275	-0.107524	-0.0827523
cg01438365	-0.18439	-0.0539499	-0.129852	0.314348	-0.05477	0.151983	-0.311861	0.0830751	-0.26743	-0.207972	-0.303078	-0.176369	-0.360345	-0.188085	-0.148378	-0.588378	-0.217997	-0.175374	-0.125242	0.0545005	0.0130533	-0.321365	0.125796	-0.0893032	-0.252608	-0.0124721	-0.0824618	-0.21313	-0.173827	-0.283092	-0.400584	-0.279037	-0.178945	-0.235443	-0.21631	0.0441937	-0.132457	0.357855	-0.271442	-0.260676	-0.328236	-0.0369287	-0.125873	-0.141265	-0.0325161	-0.375306	-0.238928	-0.0922797	-0.277237
cg01765249	0.00796453	-0.135337	-0.0196781	0.030481	0.00547958	0.0572222	0.252813	-0.0196935	0.129311	0.0119293	-0.0140611	-0.073115	-0.0224369	-0.0486708	0.148557	-0.0637258	0.151261	0.278339	0.0115278	-0.0469545	-0.0405823	0.102166	0.0123569	0.182201	0.0369564	-0.0351893	0.116969	0.126672	-0.0031805	-0.0274383	0.117286	0.256391	-0.0667497	0.102191	-0.0954747	0.0824791	0.0356664	0.152932	0.0483683	0.0230865	0.00557255	-0.053683	-0.0159145	0.250389	0.0633981	0.11388	0.17789	0.071344	0.192927
cg01913455	0.0241054	-0.135715	-0.280032	0.300322	-0.0455214	0.25924	0.00164876	-0.00671407	-0.245353	-0.218369	-0.29728	-0.209566	-0.270778	-0.249729	-0.0468719	-0.476315	-0.138701	0.0694922	0.133392	-0.181606	-0.0231388	-0.166457	0.309773	-0.0556904	-0.203093	-0.0674193	0.0341632	-0.0470895	-0.122638	-0.285542	-0.216525	-0.102637	-0.0569702	-0.148536	-0.123906	-0.121034	-0.132971	0.431479	-0.127971	-0.253975	-0.404219	-0.186251	-0.236423	0.0189851	-0.0214558	-0.225829	-0.0300109	0.0440812	-0.126278
cg02577108	0.308189	-0.0720209	-0.0649796	0.0554129	-0.151997	0.0240857	0.314108	-0.0913991	0.0407655	-0.00130277	0.037442	0.0305052	-0.0117221	-0.0888937	0.245104	0.0901657	0.110509	0.383265	0.130185	-0.12829	-0.0181258	0.199032	0.116155	0.204029	-0.0334951	-0.0446918	-0.0232453	0.383607	0.153345	0.0780493	0.2069	0.224279	-0.110982	0.055448	-0.0782151	-0.00607984	0.0380861	0.198748	0.0454059	-0.0497405	-0.0259868	-0.0384866	-0.0921218	0.162469	-0.0288432	0.0340461	0.403469	-0.0651444	0.0659476
cg02829706	0.0434629	-0.227746	-0.332923	0.208517	-0.23977	-0.0914435	0.0275955	-0.163402	-0.238165	-0.33547	-0.195729	-0.176829	-0.124871	-0.245126	-0.032488	-0.0777485	-0.20385	-0.115707	-0.0860741	-0.240141	0.0170514	-0.099073	0.203876	-0.191778	-0.0890088	-0.166456	-0.13932	-0.00783286	-0.169933	-0.171089	0.0416129	-0.0884007	-0.147686	-0.216792	-0.296077	-0.149448	0.014275	0.153214	-0.109756	-0.156295	-0.156029	-0.284495	-0.145103	-0.0585231	-0.119956	-0.0321853	0.00945913	-0.0798626	0.127104
cg03656099	-0.0871502	0.170125	0.0880078	0.199173	0.197568	0.143208	-0.0812222	0.163468	0.0707313	0.0400123	0.0219384	0.116288	0.0549157	0.145383	0.013019	-0.333286	0.0664525	0.0421909	-0.166368	0.198821	0.0771772	-0.00584245	-0.0202569	0.227285	-0.0102274	0.230216	0.120529	0.0673306	0.0815497	0.0056735	-0.0855836	-0.00976821	0.124608	0.0337794	0.0271854	0.0771223	0.072117	0.159199	0.0170454	0.0251575	-0.0124803	0.131637	0.143972	0.0568131	0.160735	-0.147014	0.116088	-0.120818	-0.0506974
cg03753391	0.10027	-0.154112	-0.34417	0.295577	-0.155582	0.225315	-0.00836934	-0.0265296	-0.31121	-0.228507	-0.288598	-0.223406	-0.294348	-0.311653	-0.00471802	-0.446677	-0.191196	0.0793595	0.224811	-0.269008	-0.0436286	-0.155255	0.316044	-0.070635	-0.201167	-0.109982	0.0223621	-0.084065	-0.165388	-0.312413	-0.207324	-0.0545354	-0.130289	-0.179138	-0.134816	-0.142103	-0.111325	0.397374	-0.144622	-0.278473	-0.374205	-0.208083	-0.250692	-0.0227286	-0.0914117	-0.214872	-0.0642972	-0.017026	-0.129404
cg04245057	0.173162	-0.114579	-0.0230871	0.00510065	-0.197717	-0.0597954	0.0964088	-0.136835	-0.012717	0.0144271	0.0706355	-0.00602208	-0.0295179	-0.0827517	0.165774	0.111116	0.0789172	0.204569	0.186013	-0.13912	-0.0983993	0.207533	0.125084	0.117458	-0.0771315	-0.0551678	0.00758484	0.236186	0.238217	-0.0132892	0.171533	0.169025	-0.0236123	0.0638184	-0.0399905	-0.106717	-0.0541417	0.121285	0.0076988	0.0141234	-0.0464787	-0.0717419	-0.132125	0.063594	-0.00573594	0.0298343	0.280352	-0.0629735	0.000101703
cg04304770	0.0492473	-0.200433	-0.22589	0.260793	-0.308314	-0.051956	-0.095362	-0.165338	-0.283603	-0.343757	-0.218546	-0.172111	-0.222572	-0.166783	-0.132981	0.0461455	-0.245142	-0.163773	-0.124844	-0.216759	-0.0169659	-0.177856	0.266428	-0.201639	-0.0275787	-0.194118	-0.184951	-0.178697	-0.212558	-0.191586	-0.152074	-0.146323	-0.180165	-0.246417	-0.20968	-0.0251337	0.0855997	0.0755663	-0.0948393	-0.116479	-0.0692322	-0.25058	-0.239966	-0.0863218	-0.149547	0.0348848	-0.104871	-0.262698	0.0649568
cg04920773	0.137376	-0.191564	-0.174567	0.063334	-0.209801	-0.0532951	-0.0311726	-0.0892411	-0.0366862	-0.221118	-0.058194	-0.166458	-0.06757	-0.107807	-0.259142	-0.155645	-0.160902	-0.140263	0.142657	-0.143908	0.0295088	0.0287844	0.0055998	-0.181871	-0.130826	-0.0697496	-0.0768123	-0.0434011	-0.0899553	-0.0740355	0.0534063	0.0757217	0.0819947	-0.0586476	-0.143438	-0.129346	-0.186381	0.0201159	-0.148541	-0.18997	-0.091553	-0.104173	-0.0243184	-0.0175123	-0.108346	0.0494474	-0.0460542	-0.0977073	-0.0199403
cg05162750	0.312237	-0.0802119	-0.0768781	0.0206029	-0.108173	0.0158138	0.285246	-0.0460394	0.0391025	0.0183118	0.0292268	0.0240239	-0.0101673	-0.0748051	0.244844	0.0365433	0.1391	0.395813	0.170705	-0.0914051	-0.0336702	0.191652	0.106039	0.212964	-0.0160704	-0.0529318	-0.0191477	0.373233	0.145929	0.110884	0.20004	0.191799	-0.0686237	0.0853341	-0.0889563	-0.022285	0.0208603	0.173982	0.0777293	-0.062082	-0.0459971	-0.0431632	-0.047704	0.0919496	0.0330527	0.0499384	0.414537	0.00563545	0.0780013
cg05477823	-0.13552	0.0915363	-0.0229165	0.24143	0.0462146	0.14032	-0.195445	0.0784659	-0.0959969	-0.0561569	-0.145633	-0.0215259	-0.177755	-0.0338788	-0.0736012	-0.466708	-0.0951819	-0.0540229	-0.156309	0.088492	0.054598	-0.178503	0.0184143	0.0952307	-0.170171	0.0874626	0.0214031	-0.0870728	-0.0467832	-0.159828	-0.325843	-0.12477	-0.0720042	-0.129834	-0.105357	0.0517431	0.0181217	0.192283	-0.143417	-0.0912669	-0.19403	0.0658763	-0.045668	-0.0436642	-0.0286507	-0.291395	-0.0393148	-0.170828	-0.192074
cg07095230	-0.144621	-0.216588	-0.431335	0.360358	-0.220957	0.28042	-0.207603	-0.0712857	-0.450628	-0.395758	-0.413964	-0.380152	-0.342502	-0.346263	-0.183928	-0.616767	-0.380431	-0.116129	0.0166086	-0.289392	-0.105145	-0.34324	0.284346	-0.236994	-0.383097	-0.218162	-0.0953866	-0.242127	-0.245035	-0.459049	-0.321364	-0.300627	-0.24692	-0.382186	-0.242524	-0.248017	-0.269638	0.527873	-0.327664	-0.361572	-0.482274	-0.253835	-0.2958	-0.217574	-0.159799	-0.414341	-0.253106	-0.0882027	-0.191281
cg09365557	-0.0362483	0.0385768	0.174899	-0.216533	0.291401	-0.0392883	0.077572	0.303093	0.243383	0.226553	0.201987	0.174384	0.190072	0.104312	-0.00205806	0.0409681	0.198773	0.152341	0.129101	0.249669	-0.0180197	0.174545	-0.041771	0.197024	0.201983	0.227834	0.109216	0.14832	0.109517	0.170929	0.180731	0.201606	0.214327	0.229732	0.0282621	0.204723	0.171129	-0.147712	0.186205	0.19753	0.157877	0.163737	0.366478	0.132601	0.179463	0.181093	0.130066	0.216924	0.193079
cg10308654	-0.115912	-0.173234	-0.337523	0.283403	-0.129114	0.275693	-0.185417	0.0222189	-0.364722	-0.346795	-0.400964	-0.302602	-0.393948	-0.324492	-0.193036	-0.615346	-0.301467	-0.113386	0.0729076	-0.199953	-0.0464122	-0.307502	0.214019	-0.199268	-0.295082	-0.103489	-0.00459557	-0.1912	-0.268634	-0.413917	-0.363341	-0.198424	-0.214233	-0.30372	-0.224668	-0.155743	-0.199947	0.441818	-0.287856	-0.284576	-0.434348	-0.186949	-0.21847	-0.13513	-0.0839539	-0.330483	-0.252775	-0.00847901	-0.263484
cg10492801	0.0731826	-0.0209491	-0.0535905	0.147438	0.0586141	-0.0210873	-0.0225877	-0.00176173	-0.0560523	-0.0451431	-0.0694434	0.00723562	0.000154346	-0.0149952	0.0229842	-0.118266	0.0536727	0.122524	0.0222313	-0.018613	-0.101569	0.0808012	0.175144	0.085005	0.0277192	-0.011649	0.0455119	-0.0102775	0.0194538	-0.0092381	-0.0299323	-0.020142	-0.0142374	0.10021	0.0114151	0.0770044	0.11201	-0.00282673	0.0817191	0.00597309	-0.0802363	-0.02153	0.041133	0.0507174	-0.0693611	0.0381968	0.122417	0.0644824	0.179338
cg10930156	0.0325503	-0.140429	-0.130769	0.108014	-0.196736	-0.0804619	0.0476219	-0.0348619	-0.181263	-0.208396	-0.161461	-0.156923	-0.0962988	-0.188631	-0.221152	-0.0107786	-0.191531	-0.161454	-0.061164	-0.137331	-0.0512108	-0.100089	0.0656945	-0.269145	-0.038504	-0.129156	-0.182987	-0.0585542	-0.0941801	-0.0220275	-0.0936055	-0.100122	-0.113186	-0.16272	-0.23368	0.00786339	-0.0675709	-0.111294	-0.138295	-0.220242	-0.174706	-0.0982564	-0.170192	-0.0248564	-0.117242	-0.117894	-0.121616	-0.0703712	-0.0854164
cg11031701	0.0450617	-0.119389	-0.0923805	-0.0732026	-0.0516768	0.0531965	0.228198	-0.0916311	0.0687119	-0.0221095	-0.0680558	-0.0593732	-0.0508036	-0.0909336	0.154664	0.0740596	0.127877	0.232968	0.171968	-0.134537	-0.157283	0.124856	0.054713	0.095297	0.00931087	-0.0818973	0.141296	0.14196	0.0447701	-0.0324478	0.0825653	0.225063	-0.131675	0.0471959	-0.116893	-0.0770142	0.0348208	0.0322857	0.0732734	-0.0155141	-0.0295307	-0.091673	-0.0769336	0.00914874	-0.0637086	0.10279	0.223333	0.145236	0.151991
cg11631427	0.24406	-0.163253	-0.283385	0.107197	-0.154505	0.0680441	0.114941	-0.0507214	-0.211277	-0.189272	-0.189066	-0.146429	-0.18716	-0.255806	0.140329	-0.234867	-0.0650174	0.284678	0.259539	-0.237289	-0.0963417	-0.0037803	0.30024	0.0302948	-0.0985077	-0.120314	0.0440364	0.0901415	-0.00967173	-0.156304	-0.0162147	0.0100341	-0.141213	-0.0621623	-0.108061	-0.134508	-0.0434082	0.309374	0.0275579	-0.215484	-0.25073	-0.176124	-0.247329	0.0467809	-0.10386	-0.114291	0.178914	0.0222229	0.0489779
cg12163132	0.0528499	0.14956	0.325334	-0.0581461	0.179127	0.00286903	0.0445943	0.292593	0.223938	0.135906	0.194193	0.216366	-0.127226	0.221802	0.0288059	0.0458918	0.337377	0.0942231	0.10091	0.27645	0.233142	0.00417584	0.0508605	0.260995	0.315845	0.270254	0.216068	0.00457678	0.174239	0.101499	-0.0988124	0.0280021	0.338338	0.277507	0.104201	0.312948	0.272809	-0.126078	0.261787	0.11735	0.157189	0.209627	0.024208	0.394308	0.370183	0.220157	0.0980897	0.264388	0.0481054
cg13274713	0.231557	-0.0514095	0.0140261	0.156591	-0.264427	-0.0235301	0.00584295	-0.0861909	-0.0533885	-0.0511435	0.105512	-0.0229079	-0.128695	-0.0989433	-0.0770694	0.0361497	-0.0911191	-0.137412	-0.0246407	-0.103858	0.0620829	-0.0488405	-0.0149466	-0.0165926	-0.106773	-0.0111599	-0.164049	0.0370909	-0.0153261	-0.0187485	-0.0830176	-0.0648709	0.0590044	-0.0151288	-0.0365223	0.0113768	0.0527234	-0.0890162	-0.0614662	-0.0178615	-0.0235121	-0.0881149	-0.0880458	0.102723	-0.0554658	0.0283156	-0.0591796	-0.211931	-0.093982
cg15735984	0.0723762	0.228342	0.306489	-0.0326192	-0.0826737	0.00634578	0.100352	0.307606	0.159964	0.146173	0.211956	0.200697	-0.0254552	0.0664264	0.322068	0.0325662	0.185719	0.0279792	-0.0288951	0.153548	0.0967212	-0.000663712	-0.275442	0.272616	0.073894	0.109106	0.0748021	0.0533617	-0.0577138	0.00807657	0.0219938	0.0914624	-0.0514724	0.180544	0.102616	0.358522	0.0880234	0.0307352	0.0176907	0.16111	0.0909251	0.228937	0.0498151	0.155298	0.136315	0.0897528	-0.0737768	0.0974844	-0.150861
cg18002447	0.0146395	0.0544363	0.0155598	0.183839	0.162568	0.133459	-0.0451756	0.011476	0.0670407	0.0327731	-0.0538474	0.0200671	0.110448	0.0781236	-0.0247227	-0.24985	-0.0274195	0.0120572	-0.134971	0.0865797	0.0191395	0.021218	0.0119423	0.134616	-0.0676453	0.178678	-0.0249915	0.0977693	0.163067	0.00755668	0.0190475	-0.0019882	0.105431	-0.0561323	-0.00649343	-0.0292888	0.0686026	0.0917023	-0.059626	0.0228513	0.0191425	0.000407559	0.0467709	0.00488692	0.121698	-0.102425	0.156909	-0.252877	-0.0453551
cg19021197	0.287586	0.0831858	0.127706	-0.0317016	0.104385	0.0304971	0.236877	0.106499	0.170456	0.121785	0.137927	0.139296	-0.032811	0.0939665	0.143546	0.0783756	0.297363	0.294802	0.215842	0.0679143	0.0772057	0.175355	0.105034	0.186688	0.163579	0.0921702	0.156616	0.200294	0.205909	0.0909251	0.142541	0.107851	0.18884	0.21547	0.072208	0.115557	0.163119	0.0358447	0.23266	0.0709393	0.0541837	0.102479	-0.0693076	0.391859	0.258186	0.221397	0.332737	0.267964	0.134904
cg19949441	-0.00970007	0.0744289	0.038149	-0.1346	0.197176	-0.0466857	-0.0182566	0.174139	0.104355	-0.00280752	0.0250126	0.0660976	0.16004	0.0690975	-0.00902645	0.0458388	0.0285528	0.0764691	-0.0385854	0.17727	-0.0384066	0.075579	0.00144568	0.104209	0.136966	0.159993	-0.0367979	0.0611555	0.0107171	0.0985704	-0.000661808	0.011973	0.0213675	0.0492405	0.0259306	0.0894256	0.0865884	-0.121228	0.0873377	0.132762	0.0871528	0.0521949	0.215882	-0.0935873	-0.0132394	-0.0165854	-0.000266442	-0.0210415	0.144534
cg20046608	-0.0343967	0.0208576	-0.0789444	-0.0739321	0.0985927	0.143729	0.151281	0.0542011	-0.0376523	0.0791217	0.0019582	-0.0097755	0.00180934	-0.0260937	0.0638112	0.007664	0.0575408	0.110371	0.151042	-0.0191004	-0.00663846	-0.00743424	0.0934242	0.0186567	0.133605	-0.0209403	0.0202466	-0.0671183	-0.145201	0.00503372	0.0124311	0.0751168	-0.0773991	-0.00737183	0.0610393	0.0474689	0.101096	0.0465913	0.13228	0.0957713	0.00377146	0.0116022	0.00117729	-0.0141116	-0.0486973	0.168466	0.0309677	0.0561645	0.101278
cg21389753	-0.122216	-0.189905	-0.381474	0.307596	-0.189362	0.246803	-0.171841	-0.0474528	-0.404651	-0.353095	-0.371861	-0.357841	-0.294682	-0.300716	-0.139053	-0.517287	-0.345022	-0.0744025	0.030269	-0.263059	-0.0801948	-0.302228	0.262719	-0.200789	-0.36238	-0.205122	-0.0996987	-0.173072	-0.193008	-0.425415	-0.276437	-0.275305	-0.218384	-0.349647	-0.22122	-0.225732	-0.219777	0.46576	-0.294677	-0.292441	-0.442798	-0.251132	-0.270055	-0.17968	-0.132233	-0.391986	-0.200878	-0.0931936	-0.16537
cg21977256	0.146209	-0.0823695	-0.100007	0.448318	0.0218329	0.0407897	-0.102875	-0.121774	-0.101942	-0.0667804	-0.0754798	-0.0680716	-0.0227688	-0.0110617	-0.0215015	-0.0352536	0.0242045	-0.00165112	-0.10074	-0.0696991	-0.000308415	-0.0476089	0.329998	-0.00457069	0.0712276	-0.00952429	-0.0172876	-0.0333901	-0.140227	0.0540998	0.0389816	-0.0938681	0.0604428	-0.000414401	-0.0485445	-0.0702013	-0.0866079	0.115682	0.0160304	-0.059161	-0.0379104	-0.0669611	0.11835	-0.0903211	0.0587356	0.000624611	-0.00936336	0.0479893	0.0417907
cg22163056	-0.21701	-0.0176276	-0.0445883	-0.111489	-0.0888295	-0.0144689	0.148398	0.0786133	0.020059	-0.0197471	-0.0792302	-0.0978338	-0.044038	-0.114637	0.232895	-0.0972236	0.0348774	-0.0273476	0.134774	-0.0051215	0.00794426	0.0191158	-0.214124	-0.0644025	-0.0378073	0.015199	0.185503	-0.00710798	-0.158111	-0.191949	0.0098893	0.187205	-0.0603519	0.0189568	0.0407144	-0.0358523	-0.13972	-0.108452	-0.0542803	0.00354334	-0.0902329	0.04634	0.0416875	-0.0929761	-0.0438867	0.0249032	-0.173833	0.12383	-0.069788
cg22449107	0.141504	0.0408973	-0.1627	0.0644757	-0.145699	-0.00765677	0.123585	0.0470304	-0.125933	-0.175858	-0.0907388	0.0144734	-0.0205568	-0.110365	0.0977652	-0.148456	-0.0940036	-0.00173822	0.00962635	-0.0989011	0.12106	0.058327	-0.0223677	-0.0710013	-0.04364	-0.00938508	-0.0233238	0.0689622	-0.086919	-0.0813028	0.0382381	0.0446176	-0.00378987	-0.036213	0.00780762	-0.101513	-0.124278	0.0736231	-0.0385077	-0.157824	-0.119815	-0.0568076	-0.108359	-0.0926484	-0.106974	-0.121625	-0.0377983	-0.0171414	-0.0841466
cg22675937	-0.118665	0.118808	0.0425596	0.194431	0.10633	0.145274	-0.153831	0.204844	-0.00766413	-0.0560789	-0.0705332	0.0174321	-0.0898268	0.0517371	-0.0848713	-0.42447	-0.0148279	-0.0606798	-0.124943	0.176093	0.0187834	-0.108345	0.0226023	0.0908463	-0.0823441	0.192759	0.103508	-0.0412762	0.0276602	-0.114898	-0.209246	-0.104845	0.081401	-0.0200632	-0.0568594	0.083551	0.0254521	0.181423	-0.0663627	-0.0160079	-0.123114	0.112023	0.0403165	0.0674532	0.113295	-0.152337	-0.0104498	-0.0982497	-0.116372
cg24357463	-0.111142	-0.187394	-0.365919	0.313002	-0.161193	0.267984	-0.21951	-0.000373286	-0.416108	-0.352794	-0.400053	-0.321661	-0.428254	-0.359415	-0.201328	-0.579724	-0.341874	-0.149588	0.111131	-0.239695	-0.0544959	-0.340261	0.270058	-0.232839	-0.274901	-0.12585	-0.0214628	-0.273369	-0.300627	-0.452925	-0.40884	-0.225393	-0.235107	-0.336642	-0.218564	-0.151359	-0.168053	0.402869	-0.28289	-0.309192	-0.431438	-0.218837	-0.25906	-0.15451	-0.133895	-0.297849	-0.312529	-0.037693	-0.227095
cg26660800	-0.195575	-0.120792	-0.326273	0.36352	-0.201982	0.216125	-0.304963	-0.0205517	-0.43392	-0.32204	-0.414856	-0.291963	-0.434448	-0.32335	-0.172659	-0.643832	-0.378638	-0.186882	-0.0520815	-0.148228	-0.0390323	-0.391792	0.226502	-0.215957	-0.361936	-0.184421	-0.142063	-0.294333	-0.242898	-0.411246	-0.47082	-0.339251	-0.305338	-0.401713	-0.295979	-0.0983566	-0.174414	0.461328	-0.367311	-0.35586	-0.454663	-0.126192	-0.293603	-0.226	-0.195252	-0.452495	-0.284855	-0.169084	-0.273341
cg26932779	4.47679e-05	-0.0777757	-0.100384	0.0172413	-0.139699	-0.0714566	-0.0499408	-0.0173789	-0.160898	-0.219069	-0.102417	-0.0743495	-0.0947799	-0.0672053	-0.148124	0.00526112	-0.133097	-0.0570518	-0.0839723	-0.0726582	-0.125448	-0.0950974	0.0775503	-0.128227	0.00997331	-0.0759059	-0.0698404	-0.159885	-0.170033	-0.0458122	-0.108116	-0.117026	-0.0670935	-0.0853195	-0.109183	0.0158931	0.0472218	-0.0175221	-0.0428941	-0.0785438	-0.0191411	-0.114731	-0.135808	-0.119923	-0.124793	0.0151939	-0.062725	-0.0982769	0.0101153
cg27005487	-0.124043	-0.209247	-0.256787	0.33249	-0.0399363	0.114533	-0.441648	-0.110764	-0.325456	-0.257113	-0.431466	-0.337429	-0.385598	-0.312826	-0.288333	-0.589179	-0.364984	-0.306128	-0.214838	-0.114903	-0.11621	-0.436865	0.149695	-0.20208	-0.380311	-0.0832504	-0.143428	-0.2214	-0.196155	-0.320966	-0.464234	-0.418418	-0.297492	-0.39566	-0.398758	-0.151835	-0.0912532	0.246785	-0.396937	-0.314544	-0.386714	-0.205695	-0.175621	-0.297418	-0.204833	-0.386864	-0.20747	-0.210617	-0.219805
cg27027242	-0.200313	0.115174	0.0949726	0.0600104	0.213752	-0.0244036	-0.14918	0.0982065	0.0362674	0.00827346	-0.150157	0.0215215	-0.0822411	0.0153894	-0.101107	-0.349004	-0.0317951	-0.185619	-0.214877	0.160685	0.0809602	-0.124259	-0.107307	0.0740455	-0.192335	0.179002	0.0557107	-0.0496693	0.0262969	-0.11223	-0.233406	-0.0771495	-0.0421619	-0.0366289	-0.0973681	0.125207	0.0202245	0.063905	-0.180462	-0.0703351	-0.112518	0.148762	0.0208581	-0.0594821	-0.00302725	-0.20819	-0.0445993	-0.000809772	-0.160232
cg27470066	-0.19514	0.0967518	0.115919	0.0764983	0.229874	0.0256512	-0.147787	0.084023	0.0645599	0.0273835	-0.113964	0.0110656	-0.0754864	0.0185742	-0.122021	-0.338932	0.00759815	-0.159516	-0.233362	0.168163	0.0772719	-0.12185	-0.109399	0.130916	-0.183482	0.181835	0.0579537	-0.0205939	0.0334586	-0.0709223	-0.211093	-0.0530683	-0.0304516	-0.0226844	-0.100247	0.124571	0.00569691	0.0812313	-0.157175	-0.0615839	-0.113431	0.140031	0.065952	-0.0482899	0.0396794	-0.203013	-0.00367797	-0.0127651	-0.150025
cg16616340	0.093487	-0.0582519	0.204399	-0.113852	0.131033	-0.055381	-0.0813552	-0.131639	0.206368	0.196493	0.120718	-0.0226252	0.140936	0.133767	-0.111184	0.147869	0.125169	-0.000307763	-0.144612	0.0563595	-0.176269	0.0575016	-0.141135	0.125064	-0.0183519	0.0656735	-0.0649268	0.149981	0.16373	0.267313	0.196141	-0.10198	0.00659566	0.117428	-0.033725	-0.0422815	-0.021994	-0.270229	0.0768793	0.0309534	0.107422	0.0453061	0.220706	0.000994733	0.0112979	0.0938298	0.157954	0.0221221	0.1509
cg16884601	-0.068785	-0.251735	-0.171792	-0.141796	-0.0936304	-0.283707	-0.104634	-0.233854	-0.00482287	-0.16189	-0.153185	-0.196726	-0.142363	-0.185516	-0.164254	-0.0686472	-0.201297	-0.156612	-0.0188514	-0.178479	-0.0814325	-0.172953	0.0124322	-0.19949	-0.14693	-0.0684118	-0.118674	-0.0820494	-0.145729	-0.0921552	-0.071681	-0.101273	-0.121644	-0.18701	-0.223817	-0.225251	-0.164749	0.0171738	-0.192423	-0.259827	-0.167797	-0.117362	-0.10555	-0.0180004	-0.183335	0.0157867	-0.0773948	-0.0295791	0.00266363
cg21800989	0.0213839	-0.0406064	-0.0287454	0.0141333	0.10151	0.037607	-0.256047	-0.0173016	-0.0637195	0.0796956	-0.0891873	-0.138357	0.0724364	0.0521943	-0.178772	-0.126741	-0.0546493	-0.149765	-0.0666678	0.00580203	-0.18591	-0.0587082	-0.0490967	-0.115342	-0.148009	0.013349	0.0212162	0.029144	0.153343	0.0888552	0.0221757	-0.229294	0.0799016	-0.000455185	-0.0409948	-0.230272	-0.161956	-0.142983	-0.156984	-0.0547928	-0.0493675	-0.0306813	0.0789022	-0.257567	0.109778	-0.0601128	-0.0115056	0.0555414	-0.0750878
cg23196081	-0.0387543	0.200778	0.142939	-0.0466068	0.236718	-0.0768437	0.355296	-0.0476566	0.277984	0.225061	0.210648	0.262606	0.346404	0.242691	0.0121862	0.217978	0.185681	0.101925	-0.271163	0.217475	0.119758	0.26537	-0.0531412	0.126075	0.268525	0.280077	0.0900595	0.303728	0.112187	0.370048	0.265884	0.255279	0.17076	0.246538	0.1443	0.0652136	0.144192	-0.281112	0.280054	0.203205	0.235548	0.201657	0.256623	0.180388	0.0240989	0.19586	0.247595	0.0713747	0.307787
cg24040948	-0.106864	-0.0926364	-0.0806094	0.0572812	0.126652	0.0376258	-0.336952	-0.0377567	-0.038751	-0.00118462	-0.162521	-0.175766	-0.0912882	0.0493887	-0.316091	-0.178043	-0.0739026	-0.253768	-0.0355349	0.0063181	-0.221616	-0.178397	0.0176412	-0.157163	-0.104049	0.0299902	0.0821759	-0.167357	0.0484463	0.0643097	-0.149215	-0.212586	0.0481798	-0.0779576	-0.10854	-0.321117	-0.179346	-0.110178	-0.126764	-0.164992	-0.119968	-0.0421991	0.0608904	-0.34898	0.054916	-0.0728648	-0.105494	0.13858	0.0396906
cg07657465	-0.020486	-0.0541888	-0.202014	-0.0238709	-0.14062	0.17326	-0.0724626	-0.118079	-0.220083	-0.208572	-0.0773114	-0.0985437	0.0546873	-0.128812	-0.194793	-0.034067	-0.146177	-0.126411	-0.123634	-0.102423	-0.0932804	-0.0125923	0.05741	-0.0802209	-0.151105	-0.252393	-0.290875	-0.0252124	-0.0699576	-0.0647524	-0.0178578	-0.204974	-0.0832029	-0.174432	-0.0867778	-0.115535	-0.101904	0.101857	-0.00921482	-0.189595	-0.142433	-0.0426232	-0.074754	-0.180617	-0.261822	-0.207661	0.00759044	-0.190292	-0.0959658
cg09418063	0.0918736	0.0693809	0.257887	-0.0417144	0.141231	-0.0587098	0.0119763	0.100504	0.0896644	0.265875	0.158164	0.0803626	-0.00315083	0.0654852	0.0194438	0.101633	0.189314	0.0366774	0.0434994	0.0620108	0.0240553	0.0150513	-0.0381837	0.0617054	0.0427888	0.0894862	-0.0650364	0.0537821	0.0945994	0.158808	0.129316	-0.0894699	0.0244443	0.0969765	0.0207904	0.163802	0.113065	-0.140006	0.0701345	0.123432	0.0380629	0.0860215	0.0906509	0.16919	0.223661	0.0538316	-0.0133203	0.119953	-0.0188034
cg14794043	0.0783592	0.0959665	0.156113	0.16419	0.211012	0.364314	0.181216	0.175596	0.202412	0.193148	0.28693	0.214236	0.0910521	0.0817467	0.00932942	0.0387065	0.24811	0.0321782	-0.0280113	0.224454	0.0251131	0.085952	0.0354028	0.11408	0.195216	0.154189	0.0312911	0.166069	0.0164968	0.142712	0.123849	-0.0366595	0.219814	0.20516	0.075388	0.144994	0.0787163	0.0790624	0.265718	0.10338	0.089273	0.202522	0.225913	0.215216	0.146752	0.123018	0.113274	0.250444	0.0642747
cg18500360	-0.0968797	-0.00063779	0.00764469	0.11366	-0.0389103	0.279823	-0.110816	-0.0908648	-0.0740265	-0.0364473	0.00821006	-0.0279307	-0.0878446	-0.101216	-0.108708	-0.0817796	0.0470401	-0.0690939	0.0162161	-0.0503544	-0.0518961	-0.0594291	0.0179699	-0.0171117	-0.0818069	0.00664127	0.00333091	-0.148672	-0.101846	0.00788455	-0.102435	-0.0766721	0.0432473	-0.0533189	-0.0636385	0.00689781	-0.0190548	0.166603	0.0155458	-0.109145	-0.0459895	-0.00835086	0.0586926	0.00286731	0.0201244	-0.0664282	-0.0699919	0.0733206	-0.0786369
cg19830270	0.0200472	-0.0941833	0.00355255	-0.0731718	0.0126466	0.00994123	-0.0287984	-0.015958	0.0468374	0.0786942	0.0845568	-0.0347941	-0.0202534	0.0163121	-0.187329	0.0104169	0.0293132	-0.0328222	0.0906265	-0.0574746	0.00288162	-0.0535441	-0.160224	0.058318	0.0177057	0.0369209	-0.16304	0.0232388	-0.101879	0.0665167	0.111018	-0.0427681	0.0534104	-0.00354556	0.0261269	-0.091343	-0.0885008	-0.144366	0.042108	-0.125036	0.0081327	0.0716028	0.231577	-0.0243986	0.124798	-0.0339284	-0.00785088	-0.0613103	-0.137936
cg22274522	0.0197631	0.09471	0.333186	-0.151774	0.24563	-0.0589887	0.313442	0.0836495	0.37475	0.365611	0.317963	0.18146	0.255712	0.306605	-0.0546038	0.231806	0.304985	0.0794638	-0.187883	0.214198	0.0883295	0.191206	-0.226063	0.198784	0.249629	0.271939	0.179496	0.32171	0.30539	0.304096	0.234287	0.178128	0.174861	0.263119	0.220998	0.10084	0.10991	-0.391991	0.191027	0.217587	0.271052	0.200884	0.201941	0.14046	0.198084	0.255683	0.217561	0.171005	0.165703
cg26938561	-0.0396517	0.179042	0.245139	0.119275	0.0816704	0.0405378	-0.0445537	0.130964	0.0890351	0.195169	0.209662	0.209198	0.0136809	0.126896	-0.0242425	0.187897	0.198881	-0.0226878	-0.00992466	0.166281	0.114889	0.0675569	0.0341376	0.200704	0.0832151	0.0865524	-0.0700882	-0.00788311	0.174443	0.0565632	-0.052697	0.0406911	0.0417388	0.106938	0.0766893	0.268034	0.189014	-0.107796	0.124994	0.0674018	0.10675	0.147636	0.149002	0.0904577	0.0873823	-0.0577127	0.0356987	0.0134048	-0.0503618
cg27291304	-0.0673068	-0.161708	-0.114398	-0.0163227	-0.0687559	-0.0761051	-0.0726479	-0.216005	-0.104136	-0.0633189	-0.11444	-0.152404	-0.144818	-0.153572	-0.170142	-0.0122865	-0.108916	0.00783336	0.056803	-0.147087	-0.14904	-0.125259	0.0841208	-0.0922446	-0.0502025	-0.0937642	-0.0433457	-0.0649118	-0.0404384	-0.0120428	-0.0134855	-0.098024	-0.167306	-0.137201	-0.125332	-0.136621	0.0129975	-0.0645115	-0.00929766	-0.0589553	-0.00763551	-0.0434502	-0.0460658	-0.109536	-0.184673	-0.0296731	-0.0675032	-0.0194093	0.110343
cg01471196	0.0443865	-0.115282	0.00190024	0.149948	0.102808	-0.0051581	-0.0272221	0.0205707	0.0226594	-0.0706534	-0.141278	0.00365563	-0.0103175	0.092476	-0.0992799	-0.0757808	0.0702454	0.0211805	-0.215878	0.122224	0.018275	-0.0315418	0.105917	0.223791	0.0783395	0.0979014	-0.0171573	-0.0211057	-0.0296321	0.0767704	-0.0684168	0.0504672	0.22179	0.0881468	-0.0524584	0.00567709	0.116614	-0.039772	0.0984569	0.0131387	-0.0511273	-0.124367	-0.0759181	-0.0154184	0.0836355	0.00303468	0.150076	-0.167592	0.0140955
cg07139762	-0.019738	-0.0485606	0.198372	-0.0382106	0.202535	-0.0481724	-0.0861449	0.127618	0.171925	0.0244641	-0.0433933	0.0908203	-0.0240088	0.200651	-0.0802132	0.0980326	0.177701	-0.0360443	-0.23497	0.289161	0.0593227	-0.0633731	0.0170395	0.27353	0.193311	0.180911	0.0220866	0.00306195	0.0321449	0.184713	-0.0746277	0.0442873	0.224359	0.148911	-0.0436147	0.122812	0.194536	-0.0841651	0.159604	0.123059	0.0885898	0.0120404	-0.0091424	0.0343684	0.229827	0.0683745	0.161366	-0.0685242	0.0256025
cg10140114	0.0732237	0.0365648	0.128296	0.0133342	0.181735	-0.0682852	-0.00982443	0.0932299	0.0695035	0.109668	-0.0556769	0.130953	0.0665281	0.185505	0.0824672	0.0141905	0.148218	0.09274	-0.211826	0.26791	0.127142	0.0543602	0.0712677	0.224465	0.167922	0.164994	0.065495	-0.0336475	0.168255	0.161022	-0.0404517	-0.000654842	0.235279	0.147365	0.0354903	0.199643	0.162756	-0.0237611	0.140955	0.0793786	0.133701	0.0290985	-0.0969727	0.074387	0.106734	0.0758883	0.176922	-0.0384161	0.13661
cg10705541	0.0383279	-0.126731	-0.223434	0.134684	-0.0456651	0.166279	-0.110284	-0.0384945	-0.177267	-0.301734	-0.242037	-0.0562024	-0.00111953	-0.0312103	-0.0894727	0.000518247	-0.14447	0.0853575	-0.0968494	-0.118844	-0.0751083	-0.0682646	0.242551	0.0842526	0.0359812	-0.104376	-0.165795	0.0146408	-0.138586	-0.0294432	-0.0323448	-0.125156	0.0201841	-0.102257	-0.0951355	-0.152338	0.0419894	0.130599	0.0318371	-0.0387552	-0.105074	-0.307346	-0.0780568	-0.199812	-0.109585	-0.232734	0.10376	-0.300965	-0.0843306
cg18739391	0.0188533	-0.0201329	-0.102467	0.0138384	-0.164489	0.113011	0.0764907	-0.0397361	-0.0188944	-0.0870294	0.0958314	-0.0374668	-0.0160119	0.0427947	0.092725	-0.0233913	0.0474614	0.117352	0.0789425	-0.0482198	0.0470756	0.0241067	-0.0477269	0.0860178	0.0188161	-0.161066	0.00653418	0.0304949	0.0393301	0.0188293	0.0638392	0.083252	0.0917052	0.080959	0.0754743	-0.140362	-0.206669	-0.0291994	0.0358682	-0.124128	-0.0157955	0.0482771	-0.0697001	-0.0313934	0.0544014	0.00739858	0.0655398	-0.0972657	-0.0628206
cg25828181	-0.00658033	-0.0728427	0.189893	-0.0701229	0.192428	-0.00272615	-0.080226	0.118196	0.182624	0.0105039	-0.0360829	0.0782036	-0.022483	0.178746	-0.072251	0.119883	0.170785	-0.0322038	-0.210947	0.246069	0.0520299	-0.080365	-0.00789421	0.292286	0.173101	0.202243	0.0177593	0.0330965	0.0141657	0.154556	-0.0779117	0.0101773	0.218452	0.150805	-0.0397793	0.112285	0.215404	-0.0962765	0.156629	0.109546	0.090818	-0.0417807	0.020543	0.0600882	0.177122	0.0513508	0.164713	-0.093795	0.0271526
cg27385032	0.100551	0.03269	0.0169826	0.107923	-0.0457456	-0.129943	-0.0606041	0.00631436	-0.0408493	-0.0263965	-0.185633	-0.0484368	-0.0600728	0.0260336	0.0325497	-0.0505087	-0.0714128	0.00391081	-0.144399	0.00087121	0.0894408	-0.0159828	0.0864028	0.0442593	0.0426927	-0.0253522	-0.0987294	-0.105881	-0.0768596	-0.112571	-0.115664	0.0621688	-0.124178	-0.0903629	-0.0847244	0.155638	0.0713646	0.0368684	-0.0855131	0.115126	0.0145636	0.0669507	-0.0932332	0.0675455	-0.00484275	-0.0353435	-0.0144992	-0.184704	-0.0239128
cg02418055	-0.00165187	-0.362294	-0.319249	0.0864555	-0.169416	0.0851124	-0.0983646	-0.343745	-0.252614	-0.105266	-0.259154	-0.378693	-0.0353002	-0.267221	-0.0712648	-0.0264677	-0.367361	-0.0951097	-0.103841	-0.226624	-0.0909601	-0.172662	0.150477	-0.203305	-0.176602	-0.205158	-0.391788	-0.0372486	-0.0405251	-0.20197	-0.0519586	-0.20675	-0.0734016	-0.361713	-0.181366	-0.285464	-0.0741408	0.0679338	-0.252712	-0.193892	-0.138625	-0.331897	-0.188364	-0.208187	-0.257215	-0.223815	-0.0808572	-0.391321	0.0192029
cg02721451	-0.0801743	-0.128318	-0.0460347	0.151733	-0.185353	0.264766	0.134526	0.00189184	-0.00391409	-0.00419854	0.0509131	-0.105831	0.0149062	-0.147701	-0.0454114	-0.0437685	-0.0426256	-0.130847	0.0443988	-0.106901	-0.200779	0.037056	-0.0721911	-0.0809922	-0.0968476	-0.0339881	-0.0188926	-0.0403773	0.00909889	-0.156463	0.0877624	-0.00382863	0.146546	0.0377948	-0.0335569	-0.0784543	-0.102863	0.116458	-0.0459214	0.038157	-0.0786504	-0.00368886	-0.0317742	-0.00719129	-0.0667163	-0.00615416	-0.10336	-0.0419677	-0.124688
cg02886522	0.0353995	-0.300181	-0.366352	0.15052	-0.246753	-0.028904	-0.149031	-0.218911	-0.315837	-0.273083	-0.374057	-0.278613	-0.253395	-0.314237	-0.138239	-0.171375	-0.366385	-0.168188	-0.00527726	-0.281903	0.00748183	-0.21777	0.14557	-0.301626	-0.256582	-0.306361	-0.284695	-0.127762	-0.233055	-0.204991	-0.148386	-0.211863	-0.272378	-0.362323	-0.282838	-0.230276	-0.106416	0.0680007	-0.319878	-0.286	-0.290674	-0.255029	-0.305789	-0.212217	-0.346134	-0.135427	-0.108164	-0.266282	-0.087889
cg05769153	-0.1747	-0.540451	-0.549202	0.220004	-0.327036	0.0984905	-0.113326	-0.624807	-0.35579	-0.353096	-0.521306	-0.584471	-0.236408	-0.435146	-0.282646	-0.143138	-0.590421	-0.258377	-0.138113	-0.473149	-0.173434	-0.345811	0.340866	-0.415228	-0.273044	-0.379932	-0.422293	-0.150252	-0.242387	-0.276954	-0.117018	-0.180932	-0.378531	-0.572633	-0.449987	-0.463524	-0.138648	0.114943	-0.48814	-0.302533	-0.315118	-0.474371	-0.299723	-0.392553	-0.522438	-0.26251	-0.172622	-0.456233	0.0322964
cg10332700	0.15442	0.2684	0.198189	-0.110878	0.0538336	-0.0919664	0.0187509	0.1982	0.0281596	0.159992	0.221866	0.25039	0.19247	0.165624	0.0657775	0.147054	0.0557714	0.0606645	-0.0207809	0.162724	0.074344	0.149121	0.0038124	0.10513	0.183122	0.104328	-0.00549031	0.0339301	0.167314	0.265301	0.0448904	0.0792736	0.163007	0.174265	0.153716	0.1865	0.149275	-0.196721	0.17286	0.205272	0.0795123	0.152355	0.0510721	0.0354173	0.00553656	-0.00392864	0.0814257	-0.0526983	0.103108
cg15202738	-0.0787766	-0.113045	-0.152823	0.0116764	0.0030248	-0.0136729	-0.0827062	-0.153848	-0.0565277	-0.085076	-0.216954	-0.234457	-0.12027	-0.197318	-0.0435082	-0.196761	-0.210199	-0.105653	-0.0818305	-0.148822	0.0091287	-0.0979699	-0.112442	-0.10894	-0.205848	-0.109655	-0.104605	-0.0553446	-0.0161519	-0.22231	-0.0832085	-0.0153403	-0.256856	-0.176417	-0.0954731	-0.0955332	-0.164959	0.0371717	-0.279562	-0.0891508	-0.108118	-0.149193	-0.0500764	-0.140384	-0.174593	-0.211865	-0.140734	-0.191151	-0.119965
cg18301583	-0.202223	-0.249147	-0.364362	0.277526	-0.204279	0.432923	-0.217362	-0.0200386	-0.37834	-0.255775	-0.379584	-0.319978	-0.264657	-0.377526	-0.160882	-0.226568	-0.429787	-0.160305	-0.0153674	-0.268304	-0.159875	-0.302666	0.154289	-0.335322	-0.378477	-0.325883	-0.24637	-0.206983	-0.345812	-0.348039	-0.240268	-0.293218	-0.281726	-0.422028	-0.306796	-0.245009	-0.26595	0.504806	-0.383767	-0.247923	-0.401517	-0.202519	-0.240896	-0.28912	-0.25694	-0.338378	-0.274714	-0.190354	-0.215676
cg22834281	0.0750142	0.266515	0.539938	-0.307815	0.265413	-0.102926	0.333882	0.149316	0.49907	0.50427	0.465788	0.335776	0.307156	0.433683	-0.0109829	0.253744	0.498469	0.148402	-0.0758475	0.396506	0.210678	0.358223	-0.338844	0.371926	0.304379	0.391538	0.279884	0.344433	0.401149	0.442146	0.305159	0.331328	0.313215	0.478075	0.356334	0.273964	0.209461	-0.467065	0.346861	0.321473	0.435141	0.335415	0.286258	0.337724	0.263021	0.339693	0.302887	0.226914	0.146355
cg24892510	0.0221323	-0.343988	-0.420466	0.342649	-0.340207	-0.011154	-0.129563	-0.320969	-0.343992	-0.426533	-0.375064	-0.326378	-0.223184	-0.403969	-0.213527	-0.161089	-0.458685	-0.263785	-0.172084	-0.294097	-0.0592361	-0.224324	0.225978	-0.352802	-0.256881	-0.280158	-0.355709	-0.108426	-0.32652	-0.15048	-0.122652	-0.129906	-0.256625	-0.350957	-0.330014	-0.264617	-0.152493	0.104149	-0.34071	-0.339196	-0.309627	-0.339708	-0.222342	-0.269931	-0.355886	-0.225648	-0.196736	-0.34051	-0.109167
cg26087117	-0.0637712	-0.262312	-0.316177	0.120216	-0.135424	-0.0892223	-0.173536	-0.244399	-0.264819	-0.18758	-0.331846	-0.245665	-0.225417	-0.208303	-0.0943985	-0.169421	-0.330189	-0.133133	-0.0955514	-0.223146	0.026442	-0.22158	0.0592244	-0.275952	-0.240099	-0.298066	-0.230466	-0.0993319	-0.25659	-0.14783	-0.163755	-0.199115	-0.279828	-0.345799	-0.297292	-0.224391	-0.04928	0.0290412	-0.329065	-0.181592	-0.249749	-0.200155	-0.212332	-0.20655	-0.293285	-0.082471	-0.0815632	-0.215159	-0.0394763
cg04062391	-0.0722307	-0.110149	-0.0921193	0.0384961	-0.188252	0.0674388	0.237864	-0.0962127	-0.0405581	-0.0342297	0.0144849	-0.100904	-0.096989	-0.224481	-0.0620549	0.0129044	-0.192197	-0.0492399	0.0140758	-0.0983796	0.0756516	-0.0675928	-0.0868147	-0.109977	-0.118814	-0.0253288	-0.195156	0.0159349	-0.118536	-0.0263547	-0.0632951	0.0783873	-0.0655309	-0.154157	-0.0646338	0.00635023	0.0522291	-0.00974139	-0.153542	-0.145937	-0.0425965	-0.162167	-0.13788	0.0460976	-0.111809	0.00313686	-0.132283	-0.19759	-0.0875023
cg05221167	-0.117896	-0.197567	-0.150068	0.0658724	-0.146262	-0.0287369	-0.0781361	-0.246119	-0.205543	-0.229605	-0.222842	-0.225792	-0.167283	-0.236116	-0.148232	-0.0323072	-0.277054	-0.258934	-0.083178	-0.232791	-0.0878093	-0.198743	0.08348	-0.224691	-0.202907	-0.000210674	-0.198525	-0.188504	-0.0775844	-0.213903	-0.1779	-0.168267	-0.242702	-0.311259	-0.195956	-0.0829376	-0.0381233	-0.0176958	-0.219292	-0.197017	-0.152075	-0.201286	-0.184103	-0.115419	-0.230591	-0.175528	-0.173372	-0.226002	-0.0262877
cg10638780	-0.0470537	-0.125908	-0.183053	0.0834692	-0.0216103	0.130879	-0.0504628	-0.0738071	-0.227559	0.0469605	-0.151619	-0.192338	-0.102952	-0.219696	-0.146863	-0.23957	-0.224055	-0.0883297	0.10547	-0.139405	-0.0815292	-0.15863	0.13449	-0.19066	-0.254581	-0.0797053	-0.14347	-0.101209	-0.12015	-0.151865	-0.175009	-0.0514311	-0.0769182	-0.198197	-0.0481291	-0.153056	0.00394889	0.0106572	-0.161355	-0.099483	-0.281958	-0.100652	-0.109432	-0.097195	-0.117186	-0.222352	-0.157878	-0.17843	-0.15478
cg11396499	-0.0407416	0.0619126	0.19054	0.0529809	-0.0479476	-0.0310276	0.152539	-0.0795081	0.203692	0.081163	0.0828409	0.0987817	0.0596285	0.127396	-0.0665536	0.227167	0.142587	-0.0171528	-0.150138	0.0987465	0.0740204	0.0862777	0.0101968	0.113908	0.177758	0.11381	0.0368979	0.128378	0.0826524	0.17418	0.116142	0.113223	0.0209939	0.0813046	0.0304656	0.122901	0.178784	-0.319444	0.0815383	0.0938721	0.201007	0.0947586	0.101375	0.11498	-0.0155114	0.228973	0.0788006	0.0546497	0.0716562
cg15222651	-0.066328	-0.118557	-0.276102	0.251066	-0.249856	-0.0104731	0.181306	-0.127721	-0.243869	-0.166412	-0.0282141	-0.0772956	-0.0831075	-0.212541	-0.0215285	-0.120049	-0.175633	-0.178351	-0.00275067	-0.215156	-0.0967784	0.0317201	0.0881081	-0.172687	-0.0975376	-0.174976	-0.22185	-0.15117	-0.211748	-0.169316	-0.0857919	0.0744937	-0.0429627	-0.0752072	-0.130754	-0.123865	-0.0666998	0.035299	-0.044513	-0.0717109	-0.193834	-0.0860088	-0.140725	-0.124626	-0.179171	-0.0238915	-0.114202	-0.172883	-0.0299421
cg15834814	-0.0451503	0.0576538	0.128239	-0.0773918	0.132531	0.0665031	0.0898761	0.149903	0.148416	0.135019	0.166091	0.0687501	-0.075944	0.151466	-0.0620749	-0.0470638	0.13761	-0.0893358	0.0579576	0.11684	0.0416695	-0.0618887	-0.0586067	0.151652	0.0595387	0.154394	-0.0105545	-0.0768034	-0.0165701	0.0384915	-0.129255	0.109381	0.0377221	0.052236	-0.0603223	0.184287	0.0894292	0.0334882	0.0320832	0.0563237	0.0663718	0.219085	0.177895	0.0606969	0.156363	0.134164	0.0359678	-0.0472603	0.139683
cg16646743	-0.00239924	-0.102655	-0.0228111	-0.00529794	-0.0214443	0.0198956	0.116238	-0.112351	0.0807058	0.0355146	-0.0901547	-0.0402274	0.0233528	-0.0656911	-0.140036	0.0220597	-0.0964287	-0.0377139	-0.156698	0.00687778	-0.0272758	-0.0236833	-0.0315073	0.0151816	0.0498681	0.0487046	-0.186077	0.0447746	-0.0135293	0.0951465	0.0104118	0.0384332	0.0357557	-0.0604433	-0.0727849	-0.0527844	0.0275593	-0.0830192	-0.0211679	-0.0267309	0.0402705	0.0330197	0.00534627	-0.0761088	-0.0508556	-0.0214981	0.0222517	-0.153549	-0.0334261
cg18452695	0.0882503	0.146824	0.0888921	-0.155196	0.0201706	-0.105971	0.174878	0.00435636	0.166276	0.0538273	0.151659	0.17798	0.203676	0.0920163	0.0622833	0.244681	0.18312	0.126377	0.013533	0.0172441	0.157022	0.241494	0.00270458	0.0630249	0.133041	0.0858524	-0.0431673	0.177208	0.150152	0.171162	0.262919	0.100396	0.123361	0.120354	0.082481	0.106125	0.0604928	-0.103954	0.143581	-0.0312251	0.17127	-0.006664	0.0754441	0.146193	0.154177	0.158447	0.17905	-0.0390177	0.0371654
cg18568589	0.00646274	-0.302124	-0.26483	0.305882	-0.188321	-0.0171668	-0.157759	-0.261936	-0.228038	-0.218745	-0.225239	-0.292771	-0.236854	-0.228005	-0.168387	-0.0310013	-0.347283	-0.299046	-0.044852	-0.314998	-0.0603553	-0.28695	0.288539	-0.261945	-0.0991546	-0.0351278	-0.306285	-0.237232	-0.0944056	-0.198611	-0.213372	-0.258499	-0.210064	-0.354798	-0.300898	-0.115907	0.060432	0.042833	-0.274175	-0.162755	-0.130243	-0.210168	-0.206637	-0.0842205	-0.226651	-0.0780966	-0.172183	-0.352316	0.0247847
cg18712973	0.113473	0.0104219	-0.000187895	-0.00303402	-0.0572778	0.0438743	0.220144	-0.0154332	0.139655	-0.0770411	0.118795	0.0301398	0.135193	0.0802354	0.0242246	0.0252266	0.0475057	0.0212217	-0.106255	0.101122	0.134279	0.110358	-0.134007	0.110451	0.0377132	0.10611	-0.121163	0.230008	-0.0658352	0.103572	0.172987	0.251602	0.151419	0.0698263	0.0887347	-0.0674438	-0.103637	-0.0598584	0.0601285	0.00835019	0.0240648	0.0759194	0.0298546	0.0489934	0.0396743	0.102878	0.182744	-0.257998	0.00461476
cg19254119	-0.0869664	-0.183297	-0.168131	-0.0218602	-0.19077	-0.0789405	-0.145873	-0.0893095	-0.237614	-0.136216	-0.154093	-0.239299	-0.161884	-0.149928	-0.170618	-0.193934	-0.247267	-0.121043	0.0376368	-0.149945	-0.125756	-0.196601	-0.0813631	-0.169509	-0.297259	-0.0845766	-0.112578	-0.15784	-0.0944693	-0.143242	-0.142378	-0.159654	-0.127624	-0.246324	-0.149664	-0.15481	-0.192432	-0.120762	-0.218504	-0.278593	-0.190197	-0.114371	-0.122626	-0.16566	-0.156983	-0.181687	-0.162685	-0.174094	-0.118625
cg19544372	0.0981085	-0.126465	-0.142414	0.184369	-0.116672	0.282007	-0.246674	-0.0811874	-0.200653	-0.145205	-0.196983	-0.140075	-0.141757	-0.115808	-0.0633006	-0.115546	-0.21184	-0.110985	-0.0742947	-0.139166	-0.05745	-0.163206	0.084321	-0.180476	-0.16199	-0.125386	-0.19939	-0.170205	-0.122583	-0.125799	-0.0842399	-0.193982	-0.169764	-0.228204	-0.116925	-0.0566965	-0.102146	0.252635	-0.222323	-0.182738	-0.13867	-0.196862	-0.148534	-0.13978	-0.0880949	-0.00388245	-0.138113	-0.206252	-0.0431692
cg20103843	0.153684	0.0570144	0.246422	0.0333362	0.184216	0.130161	0.21221	0.0672409	0.305324	0.410068	0.34129	0.217956	0.2024	0.0985735	0.113407	0.2737	0.335418	0.196181	0.0836504	0.204852	-0.109937	0.240175	-0.0096174	0.222227	0.271253	0.248841	0.163032	0.0921483	0.198685	0.321547	0.243525	0.200729	0.271497	0.36064	0.214915	0.145423	0.115362	-0.199235	0.305349	0.0459907	0.209896	0.180671	0.201673	0.222587	0.0499206	0.321087	0.189499	0.178524	0.195357
cg24818573	0.0500593	-0.0752257	-0.0664666	-0.039738	-0.0700752	-0.011925	-0.0510429	0.0534241	-0.0221683	0.00906555	0.0558995	-0.0392467	0.0263895	-0.0647165	-0.0717726	-0.0543063	-0.163811	-0.0854614	0.0670006	0.0705253	0.0306014	0.0261329	-0.100603	-0.0283893	-0.00830544	-0.0510228	-0.117028	0.167983	-0.0301997	-0.0273689	0.0955297	0.0999672	0.00901713	-0.061755	0.0688842	-0.12757	-0.0758124	0.0234595	-0.101084	0.0745013	-0.0465663	0.113	0.0609415	-0.0496562	-0.00275871	-0.123303	-0.0524032	-0.214028	-0.0698417
cg02440177	-0.0109206	-0.136006	0.0294016	0.511971	0.0303758	0.123862	-0.0466439	-0.00324641	0.080415	-0.0307109	0.0229624	-0.0247154	-0.0751744	-0.012356	-0.110758	-0.0116407	0.0186535	-0.136275	-0.176661	0.0220988	-0.079211	-0.110122	0.298198	0.0227396	0.0613857	0.00740182	-0.0251801	-0.0725653	-0.00633307	-0.0308329	-0.121533	-0.147512	0.13443	0.0512628	-0.133382	0.0414213	0.0660826	0.0843909	0.0164155	0.0345456	-0.0495328	-0.0544954	-0.00588355	0.0575787	0.0146661	0.0601008	-0.0305166	0.0106549	0.00864466
cg04318704	-0.105977	-0.174437	-0.0273175	0.0775396	0.1644	0.0757047	-0.154506	-0.0162976	0.0404656	-0.0133442	-0.12707	-0.122258	-0.0598257	-0.0409057	-0.188638	-0.0725897	0.0170941	-0.103743	-0.135368	-0.00585646	-0.167385	-0.14965	0.130328	-0.0177754	-0.0087953	0.0909152	0.110988	-0.215747	-0.146844	-0.158494	-0.206109	-0.0379067	0.0654194	-0.0513443	-0.157413	-0.00226508	0.0698108	-0.038933	0.0154292	0.00690538	-0.0282204	-0.157644	0.0366553	0.0567976	-0.0350704	0.0755278	-0.0704988	0.118528	0.15959
cg04575393	-0.0141517	0.185488	0.308443	-0.142832	0.218805	0.147703	0.00796909	0.348944	0.211163	0.235796	0.224625	0.209379	-0.105942	0.181748	-0.0607832	0.00176117	0.26845	0.0258166	0.183981	0.144508	0.0313764	-0.0700752	-0.124497	0.144115	0.148261	0.303398	0.253156	-0.0188552	0.152082	0.0926609	-0.159524	-0.103628	0.101576	0.197634	0.153027	0.107286	0.193121	-0.0397234	0.203049	0.18371	0.0992878	0.23054	0.0445275	0.121049	0.332587	0.0154932	-0.00279357	0.319426	-0.0625753
cg07559730	0.029381	-0.129313	-0.17723	0.00915082	-0.127713	-0.012207	-0.106575	-0.165791	-0.195714	-0.144372	-0.148776	-0.156874	-0.118754	-0.158301	-0.101417	0.0493706	-0.201407	-0.196454	-0.174589	-0.165287	-0.0354828	-0.15206	0.109606	-0.19953	-0.0738126	-0.0990438	-0.146372	-0.14231	-0.218806	-0.169284	-0.142782	-0.144505	-0.146681	-0.226101	-0.166345	-0.0701168	0.0301241	0.0294229	-0.150178	-0.0608522	-0.0358295	-0.192656	-0.0728501	-0.161457	-0.176726	0.0811048	-0.108193	-0.133796	0.082217
[truncated: 40 more rows]
[truncated: 20 more columns]

## Sheet: adj.p_significance
	NLRP2	ROPN1	LIMS2	PGR	KCNK2	MYBPC2	CHGB	DLL3	EFS	MYH14	CLEC11A	RNF43	CNTN3	ROPN1B	DLGAP3	TBX2	ZNF835	SULT4A1	LRRC4B	GATA4	PKLR	MEGF10	BTBD10	ZSCAN1	AHCYL2	MPZ	ZNF208	CHRNB2	ASRGL1	SYNPR	GRIK3	DNALI1	HPGD	ZNF667-AS1	KLK13	MYO7B	SLC16A5	MRAP	ZNF415	CDC42BPG	LURAP1	GSTA3	TSGA10IP	PCDHB9	MSC	LINC02610	SCN8A	ZNF560	ZNF334
[truncated: 851 more rows]
[truncated: 20 more columns]

[truncated: 1 more sheets: probe_features]
