# Supplementary material for: Methylation-driven gene DLL3 is a potential prognostic biomarker in ocular melanoma correlating with metastasis
Source: Front Oncol. 2022 Oct 20;12:964902. doi: 10.3389/fonc.2022.964902 (PMC9630341; doi:10.3389/fonc.2022.964902)
Supplement: Supplementary Table 4 — The methylation level of CpGs in DLL3 was positively associated with UM. [file Table_4.xlsx]

## Sheet: Sheet1
	logFC	AveExpr	t	P.Value	adj.P.Val	B	Uveal_melanoma_AVG	uvea_AVG	deltaBeta	CHR	MAPINFO	Strand	Type	gene	feature	cgi	feat.cgi	UCSC_CpG_Islands_Name	DHS	Enhancer	Phantom	Probe_SNPs	Probe_SNPs_10
cg06664357	0.531615	0.465309	10.3287	1.13738e-09	6.36739e-08	12.2382	0.682788	0.151173	-0.531615	19	39993390	F	I	DLL3	Body	island	Body-island	chr19:39993357-39993765	NA	NA		rs2278440
cg09431525	0.309368	0.817434	8.75614	1.93407e-08	6.63698e-07	9.35905	0.943994	0.634626	-0.309368	19	39993313	R	II	DLL3	Body	shore	Body-shore	chr19:39993357-39993765	NA	NA
cg15412721	0.293617	0.833762	7.72444	1.47177e-07	3.57988e-06	7.29481	0.953878	0.660261	-0.293617	19	39995588	R	II	DLL3	Body	shore	Body-shore	chr19:39993357-39993765	NA	NA
cg19183842	0.39934	0.591792	5.42012	2.26447e-05	0.000235022	2.18899	0.755158	0.355819	-0.39934	19	39993358	R	II	DLL3	Body	island	Body-island	chr19:39993357-39993765	NA	NA
cg17945053	0.124314	0.869728	4.97007	6.49456e-05	0.000560612	1.1289	0.920584	0.79627	-0.124314	19	39991936	F	II	DLL3	Body	shore	Body-shore	chr19:39993357-39993765	NA	NA		rs7247163
cg14925296	0.048867	0.924437	4.22433	0.000382452	0.00238324	-0.642366	0.944428	0.895561	-0.048867	19	39995913	R	I	DLL3	Body	shore	Body-shore	chr19:39997590-39998291	NA	NA			rs7249157
cg26536750	0.212032	0.810008	3.9749	0.000693686	0.00386885	-1.23232	0.896748	0.684716	-0.212032	19	39998930	F	II	DLL3	3'UTR	shore	3'UTR-shore	chr19:39997590-39998291	NA	NA
cg25425784	0.165319	0.119487	2.63469	0.0155179	0.0453905	-4.24019	0.187117	0.0217979	-0.165319	19	39990055	F	II	DLL3	Body	island	Body-island	chr19:39989397-39990140	NA	NA
