# Supplementary material for: Methylation-driven gene DLL3 is a potential prognostic biomarker in ocular melanoma correlating with metastasis
Source: Front Oncol. 2022 Oct 20;12:964902. doi: 10.3389/fonc.2022.964902 (PMC9630341; doi:10.3389/fonc.2022.964902)
Supplement: Supplementary Table 5 — The results of GO terms and KEGG pathways enrichment analyses as well as the results of GSEA of cancer hallmarks. [file Table_5.xlsx]

## Sheet: GO
	ONTOLOGY	ID	Description	GeneRatio	BgRatio	pvalue	p.adjust	qvalue	geneID	Count
GO:0042110	BP	GO:0042110	T cell activation	72/1083	483/18866	7.5809e-14	3.89583e-10	3.48402e-10	HFE/CD74/RUNX3/GLI2/PAK3/PTPRC/LAG3/CD209/IL12RB1/GRAP2/SLA2/TNFSF13B/IL7/FGL1/RASAL3/EFNB3/FOXN1/IFNG/CD83/ITK/ZAP70/CD2/ZP4/LAX1/PCK1/GPR18/IRF1/CD70/FGL2/DLL4/IDO1/SPINK5/PTPN22/SIT1/CD27/RORC/CAMK4/CD8A/KIT/CD3G/SLAMF6/CTLA4/IL15/SYK/CLEC4D/B2M/NOD2/CD3D/TMIGD2/CD300A/RHOH/PTGER4/CD8B/RASGRP1/THEMIS/CD7/ZNF683/EGR3/FUT7/CLEC4G/SATB1/LCK/CLECL1/BTLA/PDCD1/HLA-DRB1/IL27/CARD11/CD3E/HLA-DOA/KLRK…	72
GO:0098742	BP	GO:0098742	cell-cell adhesion via plasma-membrane adhesion molecules	50/1083	277/18866	3.98591e-13	1.02418e-09	9.15921e-10	TENM1/CDH1/CDH7/PCDHB4/PCDHA6/CD209/MAG/CDH23/PCDHB2/PCDHB6/PCDHB15/EPCAM/PCDHB8/PCDHB10/LRRC4B/CRB1/KLF4/AMIGO2/NECTIN4/PCDHB18P/PTPRD/UNC5D/MPZ/CLDN1/IL1RAPL1/ROBO1/DAB1/PCDHB9/CLDN7/CADM1/ROBO2/SLITRK2/CDHR4/PCDH18/L1CAM/PCDHA9/PCDHA2/PCDHA1/MIR221/TENM3/PCDHA13/PCDHGC4/PCDHA11/PCDHA10/PCDHA12/PCDHGA12/PCDHGB4/PCDHA3/PCDHB16/PCDH20	50
GO:0030217	BP	GO:0030217	T cell differentiation	46/1083	253/18866	2.6837e-12	4.42726e-09	3.95928e-09	CD74/RUNX3/GLI2/PTPRC/LAG3/IL12RB1/IL7/FOXN1/IFNG/CD83/ITK/ZAP70/CD2/PCK1/GPR18/IRF1/FGL2/DLL4/SPINK5/PTPN22/CD27/RORC/CAMK4/CD8A/KIT/CD3G/SLAMF6/CTLA4/IL15/SYK/CLEC4D/B2M/CD3D/RHOH/PTGER4/RASGRP1/THEMIS/ZNF683/EGR3/FUT7/SATB1/LCK/IL27/CARD11/CD3E/HLA-DOA	46
GO:0050863	BP	GO:0050863	regulation of T cell activation	54/1083	332/18866	3.44601e-12	4.42726e-09	3.95928e-09	HFE/CD74/RUNX3/GLI2/PAK3/PTPRC/LAG3/CD209/IL12RB1/GRAP2/TNFSF13B/IL7/FGL1/RASAL3/EFNB3/FOXN1/IFNG/CD83/ZAP70/CD2/ZP4/LAX1/PCK1/IRF1/CD70/FGL2/IDO1/SPINK5/PTPN22/SIT1/CD27/CAMK4/CTLA4/IL15/SYK/NOD2/TMIGD2/CD300A/RHOH/RASGRP1/ZNF683/EGR3/CLEC4G/LCK/CLECL1/BTLA/PDCD1/HLA-DRB1/IL27/CARD11/CD3E/HLA-DOA/KLRK1/CCL5	54
GO:1903037	BP	GO:1903037	regulation of leukocyte cell-cell adhesion	52/1083	329/18866	2.6287e-11	2.70178e-08	2.41619e-08	HFE/CD74/RUNX3/GLI2/PAK3/PTPRC/LAG3/CD209/IL12RB1/GRAP2/TNFSF13B/IL7/FGL1/RASAL3/EFNB3/IFNG/ADTRP/CD83/ZAP70/ITGA4/ZP4/LAX1/PCK1/IRF1/CD70/FGL2/IDO1/PTPN22/KLF4/CD27/CTLA4/IL15/SYK/NOD2/TMIGD2/CD300A/RHOH/HAS2/RASGRP1/EGR3/FUT7/CLEC4G/LCK/CLECL1/BTLA/PDCD1/HLA-DRB1/CARD11/CD3E/MIR221/KLRK1/CCL5	52
GO:0007156	BP	GO:0007156	homophilic cell adhesion via plasma membrane adhesion molecules	34/1083	168/18866	9.67906e-11	8.29012e-08	7.41382e-08	CDH1/CDH7/PCDHB4/PCDHA6/CDH23/PCDHB2/PCDHB6/PCDHB15/PCDHB8/PCDHB10/AMIGO2/NECTIN4/PCDHB18P/ROBO1/PCDHB9/CADM1/ROBO2/CDHR4/PCDH18/L1CAM/PCDHA9/PCDHA2/PCDHA1/TENM3/PCDHA13/PCDHGC4/PCDHA11/PCDHA10/PCDHA12/PCDHGA12/PCDHGB4/PCDHA3/PCDHB16/PCDH20	34
GO:0007159	BP	GO:0007159	leukocyte cell-cell adhesion	54/1083	364/18866	1.27643e-10	9.37083e-08	8.3803e-08	HFE/CD74/RUNX3/GLI2/PAK3/PTPRC/LAG3/CD209/IL12RB1/GRAP2/TNFSF13B/IL7/FGL1/RASAL3/EFNB3/IFNG/ADTRP/CD83/ZAP70/ITGA4/ZP4/LAX1/PCK1/IRF1/CD70/FGL2/IDO1/PTPN22/NT5E/KLF4/CD27/FERMT3/CTLA4/IL15/SYK/NOD2/TMIGD2/CD300A/RHOH/HAS2/RASGRP1/EGR3/FUT7/CLEC4G/LCK/CLECL1/BTLA/PDCD1/HLA-DRB1/CARD11/CD3E/MIR221/KLRK1/CCL5	54
GO:0022407	BP	GO:0022407	regulation of cell-cell adhesion	60/1083	439/18866	3.45138e-10	2.21708e-07	1.98273e-07	HFE/CD74/RUNX3/CDH1/GLI2/PAK3/PTPRC/LAG3/CD209/IL12RB1/GRAP2/TNFSF13B/IL7/FGL1/RASAL3/EFNB3/IFNG/ADTRP/CD83/ZAP70/ITGA4/ZP4/EPCAM/LAX1/PCK1/IRF1/CD70/FOXA2/FGL2/FOXA1/IDO1/PTPN22/KLF4/CD27/MEGF10/FERMT3/CTLA4/IL15/SYK/NOD2/TMIGD2/CD300A/RHOH/HAS2/FUT3/RASGRP1/EGR3/FUT7/CLEC4G/LCK/CLECL1/BTLA/PDCD1/HLA-DRB1/CARD11/CD3E/MIR221/KLRK1/TENM3/CCL5	60
GO:0030098	BP	GO:0030098	lymphocyte differentiation	52/1083	368/18866	1.63409e-09	9.33065e-07	8.34437e-07	CD74/RUNX3/GLI2/PTPRC/LAG3/IL12RB1/SFRP1/IL7/FOXN1/IFNG/CD83/ITK/ZAP70/ITGA4/CD2/PCK1/GPR18/IRF1/FGL2/DLL4/SPINK5/PTPN22/DOCK10/CD27/RORC/DOCK11/CAMK4/CD8A/KIT/CD3G/FCRL3/IKZF3/SLAMF6/CTLA4/IL15/SYK/CLEC4D/B2M/CD3D/RHOH/PTGER4/RASGRP1/THEMIS/ZNF683/EGR3/FUT7/SATB1/LCK/IL27/CARD11/CD3E/HLA-DOA	52
GO:1903039	BP	GO:1903039	positive regulation of leukocyte cell-cell adhesion	39/1083	235/18866	1.95604e-09	1.00521e-06	8.98956e-07	CD74/RUNX3/GLI2/PAK3/PTPRC/CD209/IL12RB1/GRAP2/TNFSF13B/IL7/RASAL3/EFNB3/IFNG/CD83/ZAP70/ITGA4/ZP4/PCK1/CD70/PTPN22/CD27/CTLA4/IL15/SYK/NOD2/TMIGD2/RHOH/HAS2/RASGRP1/EGR3/FUT7/LCK/CLECL1/BTLA/PDCD1/CARD11/CD3E/KLRK1/CCL5	39
GO:0022409	BP	GO:0022409	positive regulation of cell-cell adhesion	43/1083	279/18866	3.06253e-09	1.43076e-06	1.27952e-06	CD74/RUNX3/GLI2/PAK3/PTPRC/CD209/IL12RB1/GRAP2/TNFSF13B/IL7/RASAL3/EFNB3/IFNG/CD83/ZAP70/ITGA4/ZP4/PCK1/CD70/FOXA2/FOXA1/PTPN22/CD27/MEGF10/CTLA4/IL15/SYK/NOD2/TMIGD2/RHOH/HAS2/FUT3/RASGRP1/EGR3/FUT7/LCK/CLECL1/BTLA/PDCD1/CARD11/CD3E/KLRK1/CCL5	43
GO:0050870	BP	GO:0050870	positive regulation of T cell activation	36/1083	214/18866	5.62386e-09	2.40842e-06	2.15384e-06	CD74/RUNX3/GLI2/PAK3/PTPRC/CD209/IL12RB1/GRAP2/TNFSF13B/IL7/RASAL3/EFNB3/IFNG/CD83/ZAP70/ZP4/PCK1/CD70/PTPN22/CD27/CTLA4/IL15/SYK/NOD2/TMIGD2/RHOH/RASGRP1/EGR3/LCK/CLECL1/BTLA/PDCD1/CARD11/CD3E/KLRK1/CCL5	36
GO:0045580	BP	GO:0045580	regulation of T cell differentiation	28/1083	150/18866	2.78332e-08	1.10027e-05	9.83965e-06	CD74/RUNX3/GLI2/PTPRC/LAG3/IL12RB1/IL7/FOXN1/IFNG/CD83/ZAP70/CD2/PCK1/IRF1/FGL2/SPINK5/CD27/CAMK4/CTLA4/IL15/SYK/RHOH/RASGRP1/ZNF683/EGR3/IL27/CARD11/HLA-DOA	28
GO:0002697	BP	GO:0002697	regulation of immune effector process	58/1083	470/18866	3.04802e-08	1.11884e-05	1.00058e-05	HFE/CD22/CD74/BIRC3/CD5L/CPB2/PTPRC/LAG3/IL12RB1/FOXF1/VTN/CLNK/IFNG/STAT1/IL18RAP/VAMP8/CPN1/IL13RA2/PCK1/FGL2/SPINK5/PTPN22/CD96/C1R/FCRL3/AZGP1/SLAMF6/AIM2/DNASE1L3/IL15/SYK/HTRA1/B2M/NOD2/CD300A/SERPINB9/RASGRP1/C1QB/ZNF683/FUT7/C1S/CLEC4G/CADM1/PROS1/FFAR3/IL27/NCR3/HLA-F/IGLV7-43/IGLC3/IGHV3-33/KLRK1/C4B/LTA/HLA-B/IGKV3-20/C4A/IGKV2-29	58
GO:0031343	BP	GO:0031343	positive regulation of cell killing	17/1083	61/18866	3.42432e-08	1.17317e-05	1.04916e-05	CD5L/PTPRC/LAG3/IL12RB1/IFNG/IL18RAP/AZGP1/SLAMF6/SYK/B2M/RASGRP1/PRF1/CADM1/NCR3/HLA-F/KLRK1/HLA-B	17
GO:0045619	BP	GO:0045619	regulation of lymphocyte differentiation	31/1083	181/18866	4.16216e-08	1.33684e-05	1.19553e-05	CD74/RUNX3/GLI2/PTPRC/LAG3/IL12RB1/SFRP1/IL7/FOXN1/IFNG/CD83/ZAP70/CD2/PCK1/IRF1/FGL2/SPINK5/CD27/CAMK4/FCRL3/IKZF3/CTLA4/IL15/SYK/RHOH/RASGRP1/ZNF683/EGR3/IL27/CARD11/HLA-DOA	31
GO:0071346	BP	GO:0071346	cellular response to interferon-gamma	31/1083	182/18866	4.74616e-08	1.43108e-05	1.27981e-05	IL12RB1/MID1/CCL24/IFNG/STAT1/GBP3/GBP1/FASLG/IRF1/TRIM22/CASP1/NLRC5/STAR/NCAM1/FCGR1A/GBP5/GBP2/GBP4/CLDN1/B2M/HLA-DQB1/HLA-DRB1/FCGR1B/HLA-DRB5/HLA-DRA/HLA-C/HLA-F/IRF9/HLA-B/CCL5/CCL4	31
GO:0034341	BP	GO:0034341	response to interferon-gamma	33/1083	202/18866	5.01253e-08	1.43108e-05	1.27981e-05	IL12RB1/MID1/CCL24/IFNG/STAT1/KYNU/GBP3/GBP1/FASLG/IRF1/TRIM22/CASP1/NLRC5/STAR/NCAM1/FCGR1A/GBP5/GBP2/GBP4/CLDN1/B2M/HLA-DQB1/HLA-DRB1/FCGR1B/HLA-DRB5/HLA-DRA/HLA-C/HLA-F/UBD/IRF9/HLA-B/CCL5/CCL4	33
GO:0045785	BP	GO:0045785	positive regulation of cell adhesion	53/1083	428/18866	1.07452e-07	2.90629e-05	2.59908e-05	CD74/RUNX3/LIMS2/GLI2/PAK3/PTPRC/CD209/IL12RB1/GRAP2/TNFSF13B/FOXF1/SFRP1/IL7/RASAL3/AGR2/EFNB3/VTN/IFNG/NEDD9/CD83/HYAL1/ZAP70/ITGA4/ZP4/PCK1/CD70/FOXA2/FOXA1/PTPN22/DYSF/CD27/MEGF10/CTLA4/IL15/SYK/NOD2/TMIGD2/RHOH/HAS2/FUT3/RASGRP1/JUP/EGR3/FUT7/LCK/CLECL1/BTLA/PDCD1/VWC2/CARD11/CD3E/KLRK1/CCL5	53
GO:0002696	BP	GO:0002696	positive regulation of leukocyte activation	51/1083	406/18866	1.18725e-07	3.05063e-05	2.72817e-05	CD38/TAC1/CD74/RUNX3/GLI2/PAK3/PTPRC/CD209/IL12RB1/GRAP2/TNFSF13B/IL7/RASAL3/EFNB3/IFNG/CD83/ZAP70/CD2/ZP4/VAMP8/PCK1/CD70/PTPN22/CD27/TTBK1/CHRNB2/FCRL3/CTLA4/IL15/SYK/CLEC4D/NOD2/TMIGD2/RHOH/RASGRP1/EGR3/LCK/CLECL1/BTLA/PDCD1/LRRK2/CARD11/CD3E/HLA-F/IGLC3/TRBC2/IGHM/IGHV3-15/IGHV3-33/KLRK1/CCL5	51
GO:0050867	BP	GO:0050867	positive regulation of cell activation	52/1083	421/18866	1.53733e-07	3.76206e-05	3.36439e-05	CD38/TAC1/CD74/RUNX3/GLI2/PAK3/PTPRC/CD209/IL12RB1/GRAP2/TNFSF13B/IL7/RASAL3/EFNB3/IFNG/CD83/ZAP70/CD2/ZP4/VAMP8/PCK1/CD70/SOX15/PTPN22/CD27/TTBK1/CHRNB2/FCRL3/CTLA4/IL15/SYK/CLEC4D/NOD2/TMIGD2/RHOH/RASGRP1/EGR3/LCK/CLECL1/BTLA/PDCD1/LRRK2/CARD11/CD3E/HLA-F/IGLC3/TRBC2/IGHM/IGHV3-15/IGHV3-33/KLRK1/CCL5	52
GO:0060333	BP	GO:0060333	interferon-gamma-mediated signaling pathway	20/1083	91/18866	1.67935e-07	3.92282e-05	3.50816e-05	MID1/IFNG/STAT1/GBP1/IRF1/TRIM22/NLRC5/NCAM1/FCGR1A/GBP2/B2M/HLA-DQB1/HLA-DRB1/FCGR1B/HLA-DRB5/HLA-DRA/HLA-C/HLA-F/IRF9/HLA-B	20
GO:0002449	BP	GO:0002449	lymphocyte mediated immunity	47/1083	366/18866	1.93043e-07	4.31325e-05	3.85733e-05	HFE/CD74/PTPRC/LAG3/IL12RB1/GZMB/SLA2/CLNK/ULBP1/IL18RAP/IL13RA2/CD70/FGL2/KLRD1/MYO1G/CD27/CD96/CD8A/C1R/AZGP1/SLAMF6/B2M/SERPINB9/RASGRP1/C1QB/HLA-DQB1/FUT7/PRF1/C1S/CLEC4G/CADM1/HLA-DRB1/NCR3/HLA-F/IGLV7-43/IGLC3/TRBC2/IGHM/IGHV3-15/IGHV3-33/KLRK1/C4B/LTA/HLA-B/IGKV3-20/C4A/IGKV2-29	47
GO:0051251	BP	GO:0051251	positive regulation of lymphocyte activation	46/1083	357/18866	2.3553e-07	5.04328e-05	4.51019e-05	CD38/TAC1/CD74/RUNX3/GLI2/PAK3/PTPRC/CD209/IL12RB1/GRAP2/TNFSF13B/IL7/RASAL3/EFNB3/IFNG/CD83/ZAP70/ZP4/PCK1/CD70/PTPN22/CD27/CHRNB2/FCRL3/CTLA4/IL15/SYK/NOD2/TMIGD2/RHOH/RASGRP1/EGR3/LCK/CLECL1/BTLA/PDCD1/CARD11/CD3E/HLA-F/IGLC3/TRBC2/IGHM/IGHV3-15/IGHV3-33/KLRK1/CCL5	46
GO:0031341	BP	GO:0031341	regulation of cell killing	19/1083	92/18866	9.41723e-07	0.000193581	0.000173118	CD5L/PTPRC/LAG3/IL12RB1/IFNG/IL18RAP/AZGP1/SLAMF6/DNASE1L3/SYK/B2M/SERPINB9/RASGRP1/PRF1/CADM1/NCR3/HLA-F/KLRK1/HLA-B	19
GO:0050670	BP	GO:0050670	regulation of lymphocyte proliferation	32/1083	219/18866	1.05925e-06	0.000209365	0.000187234	CD38/TAC1/CD22/CD74/GAL/PTPRC/CD209/IL12RB1/TNFSF13B/IL7/RASAL3/ZAP70/ZP4/IRF1/CD70/IDO1/PTPN22/CHRNB2/FCRL3/IKZF3/CTLA4/IL15/SYK/TMIGD2/CD300A/CLEC4G/CLECL1/HLA-DRB1/IL27/CARD11/CD3E/CCL5	32
GO:0032944	BP	GO:0032944	regulation of mononuclear cell proliferation	32/1083	221/18866	1.29748e-06	0.000246953	0.000220849	CD38/TAC1/CD22/CD74/GAL/PTPRC/CD209/IL12RB1/TNFSF13B/IL7/RASAL3/ZAP70/ZP4/IRF1/CD70/IDO1/PTPN22/CHRNB2/FCRL3/IKZF3/CTLA4/IL15/SYK/TMIGD2/CD300A/CLEC4G/CLECL1/HLA-DRB1/IL27/CARD11/CD3E/CCL5	32
GO:0019932	BP	GO:0019932	second-messenger-mediated signaling	52/1083	456/18866	1.81232e-06	0.000332626	0.000297466	CD22/GAL/LMCD1/RAPGEF3/PTPRC/SLA2/RASD1/ZAP70/FHL2/GBP1/CNR1/ITPR2/SOX9/ADM2/SSTR4/CHRM3/ADGRB3/AGT/HTR2B/EDNRB/CXCL9/GNAL/ATP1B1/ACKR2/EPHA5/JPH3/CLIC2/ADGRG5/CCR5/PTH1R/ADCY1/SYK/GALR1/CXCL10/CXCL11/ADRB2/LPAR3/PTGER4/NEUROD2/CXCR6/PDE3A/ADGRE1/TBC1D10C/MC5R/GRIN2A/ADRA2C/CXCR3/LRRK2/PLN/CD3E/MT1M/CCL4	52
GO:0045058	BP	GO:0045058	T cell selection	13/1083	49/18866	2.59117e-06	0.000459173	0.000410637	CD74/PTPRC/IL12RB1/FOXN1/ZAP70/CD3G/SLAMF6/IL15/SYK/CD3D/THEMIS/CARD11/CD3E	13
GO:0002683	BP	GO:0002683	negative regulation of immune system process	52/1083	463/18866	2.84274e-06	0.000486962	0.000435489	HFE/CD22/CD74/RUNX3/GAL/CST7/HOXA9/PTPRC/LAG3/SLA2/FOXF1/SFRP1/FGL1/CLNK/ADTRP/GBP1/CNR1/LAX1/IL13RA2/GPR18/IRF1/SOX9/FGL2/IDO1/SYT11/SPINK5/PTPN22/GPR55/NLRC5/GPR17/CD96/UBASH3A/FCRL3/IFI16/CTLA4/HTRA1/CD300A/SERPINB9/PTGER4/NLRP6/GPR171/TBC1D10C/CLEC4G/PDCD1/HLA-DRB1/HLA-DOA/HLA-F/MIR221/KLRK1/HLA-B/HLA-DOB/H4C5	52
GO:0002228	BP	GO:0002228	natural killer cell mediated immunity	15/1083	66/18866	3.7179e-06	0.000616331	0.000551183	LAG3/GZMB/CLNK/ULBP1/IL18RAP/KLRD1/CD96/SLAMF6/SERPINB9/RASGRP1/CADM1/NCR3/HLA-F/KLRK1/HLA-B	15
GO:0002429	BP	GO:0002429	immune response-activating cell surface receptor signaling pathway	53/1083	481/18866	4.02054e-06	0.000626107	0.000559926	CD38/CD22/ICAM3/PAK3/PTPRC/CD209/GRAP2/SLA2/ITK/ZAP70/GBP1/LAX1/WIPF3/PTPN22/MYO1G/FCGR1A/UBASH3A/CD3G/FCRL3/CTLA4/SYK/BTNL9/PRKCB/CLEC4D/CD3D/CD300A/MUC7/THEMIS/HLA-DQB1/LCK/PDE4B/HLA-DRB1/CARD11/HLA-DRB5/CD247/CD3E/FCGR3A/PSMB8/HLA-DRA/NCR3/MUC12/IGLV7-43/IGLC3/TRBC2/TRAV19/IGHM/IGHV3-15/IGHV3-33/KLRK1/IGKV3-20/PSMB9/IGKV2-29/TRAC	53
GO:0002757	BP	GO:0002757	immune response-activating signal transduction	53/1083	481/18866	4.02054e-06	0.000626107	0.000559926	CD38/CD22/ICAM3/PAK3/PTPRC/CD209/GRAP2/SLA2/ITK/ZAP70/GBP1/LAX1/WIPF3/PTPN22/MYO1G/FCGR1A/UBASH3A/CD3G/FCRL3/CTLA4/SYK/BTNL9/PRKCB/CLEC4D/CD3D/CD300A/MUC7/THEMIS/HLA-DQB1/LCK/PDE4B/HLA-DRB1/CARD11/HLA-DRB5/CD247/CD3E/FCGR3A/PSMB8/HLA-DRA/NCR3/MUC12/IGLV7-43/IGLC3/TRBC2/TRAV19/IGHM/IGHV3-15/IGHV3-33/KLRK1/IGKV3-20/PSMB9/IGKV2-29/TRAC	53
GO:1902105	BP	GO:1902105	regulation of leukocyte differentiation	37/1083	290/18866	4.41755e-06	0.0006677	0.000597122	CD74/RUNX3/GLI2/PTPRC/TESC/LAG3/IL12RB1/SFRP1/IL7/FOXN1/IFNG/CD83/ZAP70/CD2/PCK1/IRF1/FGL2/SPINK5/GPR55/CD27/CAMK4/FCRL3/IKZF3/IL20/CTLA4/IL15/DCSTAMP/SYK/RHOH/RASGRP1/ZNF683/EGR3/HLA-DRB1/IL27/CARD11/HLA-DOA/HLA-B	37
GO:0045059	BP	GO:0045059	positive thymic T cell selection	7/1083	14/18866	4.84092e-06	0.000704092	0.000629667	CD74/PTPRC/FOXN1/ZAP70/CD3G/CD3D/CD3E	7
GO:0001819	BP	GO:0001819	positive regulation of cytokine production	50/1083	447/18866	4.93234e-06	0.000704092	0.000629667	CD74/NLRP2/BIRC3/PTPRC/IL12RB2/WNT11/IL12RB1/IL7/CLNK/IFNG/CD83/STAT1/CD2/TWIST1/ZBP1/IRF1/IDO1/PTPN22/AGT/HTR2B/GATA4/SORL1/CASP1/GBP5/SLAMF6/PYHIN1/IFI16/AIM2/IL15/SYK/B2M/NOD2/TMIGD2/PTGER4/RASGRP1/HPSE/TLR1/CADM1/PDE4B/NLRP9/FFAR3/SULF2/IL27/CLEC9A/CARD11/CD3E/HLA-F/KLRK1/LTA/LTB	50
GO:0001912	BP	GO:0001912	positive regulation of leukocyte mediated cytotoxicity	13/1083	52/18866	5.33562e-06	0.000741074	0.00066274	PTPRC/LAG3/IL12RB1/IL18RAP/AZGP1/SLAMF6/B2M/RASGRP1/CADM1/NCR3/HLA-F/KLRK1/HLA-B	13
GO:0002715	BP	GO:0002715	regulation of natural killer cell mediated immunity	12/1083	45/18866	5.93067e-06	0.000802045	0.000717266	LAG3/CLNK/IL18RAP/CD96/SLAMF6/SERPINB9/RASGRP1/CADM1/NCR3/HLA-F/KLRK1/HLA-B	12
GO:0070663	BP	GO:0070663	regulation of leukocyte proliferation	32/1083	240/18866	7.72174e-06	0.00101749	0.000909936	CD38/TAC1/CD22/CD74/GAL/PTPRC/CD209/IL12RB1/TNFSF13B/IL7/RASAL3/ZAP70/ZP4/IRF1/CD70/IDO1/PTPN22/CHRNB2/FCRL3/IKZF3/CTLA4/IL15/SYK/TMIGD2/CD300A/CLEC4G/CLECL1/HLA-DRB1/IL27/CARD11/CD3E/CCL5	32
GO:0007204	BP	GO:0007204	positive regulation of cytosolic calcium ion concentration	39/1083	322/18866	8.63272e-06	0.00110909	0.000991854	CD38/TAC1/P2RY10/PTPRC/ESR1/TRPA1/CCKBR/FASLG/CNR1/ITPR2/GPR18/AGT/GPR55/HTR2B/EDNRB/TRPC3/CXCL9/METTL21C/GPR17/ACKR2/GPR174/JPH3/CLIC2/GHRL/CCR5/PTH1R/GALR1/CXCL10/CXCL11/CD52/LPAR3/PTGER4/CXCR6/CYSLTR1/LCK/GRIN2A/CXCR3/TRPV2/PLN	39
GO:0046631	BP	GO:0046631	alpha-beta T cell activation	23/1083	146/18866	9.66509e-06	0.00118975	0.00106399	HFE/RUNX3/PTPRC/IL12RB1/RASAL3/IFNG/CD83/ITK/ZAP70/GPR18/IRF1/PTPN22/RORC/SLAMF6/IL15/SYK/CD300A/PTGER4/ZNF683/FUT7/SATB1/IL27/CD3E	23
GO:0050671	BP	GO:0050671	positive regulation of lymphocyte proliferation	22/1083	136/18866	9.72355e-06	0.00118975	0.00106399	CD38/TAC1/CD74/PTPRC/CD209/IL12RB1/TNFSF13B/IL7/RASAL3/ZAP70/ZP4/CD70/PTPN22/CHRNB2/FCRL3/IL15/SYK/TMIGD2/CLECL1/CARD11/CD3E/CCL5	22
GO:0050851	BP	GO:0050851	antigen receptor-mediated signaling pathway	39/1083	325/18866	1.07392e-05	0.00128083	0.00114544	CD38/CD22/PAK3/PTPRC/GRAP2/SLA2/ITK/ZAP70/GBP1/LAX1/PTPN22/UBASH3A/CD3G/FCRL3/CTLA4/SYK/BTNL9/PRKCB/CD3D/CD300A/THEMIS/HLA-DQB1/LCK/PDE4B/HLA-DRB1/CARD11/HLA-DRB5/CD247/CD3E/PSMB8/HLA-DRA/IGLC3/TRBC2/TRAV19/IGHM/IGHV3-15/IGHV3-33/PSMB9/TRAC	39
GO:0032946	BP	GO:0032946	positive regulation of mononuclear cell proliferation	22/1083	137/18866	1.09665e-05	0.00128083	0.00114544	CD38/TAC1/CD74/PTPRC/CD209/IL12RB1/TNFSF13B/IL7/RASAL3/ZAP70/ZP4/CD70/PTPN22/CHRNB2/FCRL3/IL15/SYK/TMIGD2/CLECL1/CARD11/CD3E/CCL5	22
GO:0050663	BP	GO:0050663	cytokine secretion	15/1083	72/18866	1.15812e-05	0.00132257	0.00118277	IFNG/SYT11/DYSF/AGT/HTR2B/SORL1/SYK/NOD2/PTGER4/TLR10/TLR1/CIDEA/CADM1/CLEC9A/NOX5	15
GO:0050727	BP	GO:0050727	regulation of inflammatory response	47/1083	425/18866	1.27246e-05	0.00142156	0.0012713	TAC1/NR1H4/BIRC3/CST7/PTPRC/ESR1/FOXF1/CCL24/IFNG/FNDC4/IL1R2/CNR1/VAMP8/ZBP1/ACE2/IDO1/SYT11/NT5E/AGT/EDNRB/KLF4/CASP1/CASP5/TNFRSF11A/SIGLEC10/GPR17/TTBK1/GBP5/GHRL/IL20/DNASE1L3/BAP1/IL15/NOD2/PTGER4/ABCD2/TLR10/NLRP6/FUT7/C1QTNF12/FFAR3/LRRK2/HLA-DRB1/MIR187/MIR221/LTA/CCL5	47
GO:0001906	BP	GO:0001906	cell killing	25/1083	172/18866	1.70473e-05	0.00186396	0.00166693	CD5L/PTPRC/LAG3/IL12RB1/APOL1/GZMB/IFNG/ULBP1/IL18RAP/REG3G/AZGP1/SLAMF6/DNASE1L3/SYK/B2M/SERPINB9/MUC7/RASGRP1/PRF1/CADM1/NCR3/HLA-F/HTN3/KLRK1/HLA-B	25
GO:0045061	BP	GO:0045061	thymic T cell selection	8/1083	22/18866	1.78241e-05	0.0019083	0.00170658	CD74/PTPRC/FOXN1/ZAP70/CD3G/CD3D/CARD11/CD3E	8
GO:0051480	BP	GO:0051480	regulation of cytosolic calcium ion concentration	41/1083	357/18866	1.85824e-05	0.00193797	0.00173312	CD38/TAC1/P2RY10/PTPRC/ESR1/TRPA1/CDH23/CCKBR/FASLG/CNR1/ITPR2/GPR18/AGT/GPR55/HTR2B/EDNRB/TRPC3/CXCL9/METTL21C/GPR17/ACKR2/GPR174/JPH3/CLIC2/GHRL/CCR5/PTH1R/GALR1/CXCL10/CXCL11/CD52/LPAR3/PTGER4/CALB2/CXCR6/CYSLTR1/LCK/GRIN2A/CXCR3/TRPV2/PLN	41
GO:0007416	BP	GO:0007416	synapse assembly	26/1083	184/18866	1.9361e-05	0.00193797	0.00173312	CDH1/PCDHB4/NRXN2/PCDHB2/PCDHB6/PCDHB10/LRRC4B/ADGRB3/AMIGO2/NTRK3/LRRTM2/NTRK2/PTPRD/GHRL/CHRNB2/PLXNB1/IL1RAPL1/LINGO2/PCDHB9/SLITRK4/ROBO2/SLITRK2/THBS2/SLIT1/VSTM5/PCDHB16	26
GO:0001910	BP	GO:0001910	regulation of leukocyte mediated cytotoxicity	15/1083	75/18866	1.94419e-05	0.00193797	0.00173312	PTPRC/LAG3/IL12RB1/IL18RAP/AZGP1/SLAMF6/DNASE1L3/B2M/SERPINB9/RASGRP1/CADM1/NCR3/HLA-F/KLRK1/HLA-B	15
GO:0050852	BP	GO:0050852	T cell receptor signaling pathway	28/1083	206/18866	1.96097e-05	0.00193797	0.00173312	PAK3/PTPRC/GRAP2/SLA2/ITK/ZAP70/GBP1/PTPN22/UBASH3A/CD3G/CTLA4/BTNL9/CD3D/CD300A/THEMIS/HLA-DQB1/LCK/PDE4B/HLA-DRB1/CARD11/HLA-DRB5/CD247/CD3E/PSMB8/HLA-DRA/TRAV19/PSMB9/TRAC	28
GO:1901890	BP	GO:1901890	positive regulation of cell junction assembly	18/1083	103/18866	2.10532e-05	0.00204136	0.00182558	SFRP1/ACE2/LRRC4B/ADGRB3/AGT/AMIGO2/NTRK3/LRRTM2/NTRK2/PTPRD/GHRL/CLDN1/IL1RAPL1/LINGO2/SLITRK4/SLITRK2/THBS2/VSTM5	18
GO:0051965	BP	GO:0051965	positive regulation of synapse assembly	14/1083	67/18866	2.17478e-05	0.00206966	0.00185089	LRRC4B/ADGRB3/AMIGO2/NTRK3/LRRTM2/NTRK2/PTPRD/GHRL/IL1RAPL1/LINGO2/SLITRK4/SLITRK2/THBS2/VSTM5	14
GO:0002717	BP	GO:0002717	positive regulation of natural killer cell mediated immunity	9/1083	29/18866	2.30588e-05	0.00208655	0.00186599	LAG3/CLNK/IL18RAP/SLAMF6/RASGRP1/CADM1/NCR3/HLA-F/KLRK1	9
GO:0031349	BP	GO:0031349	positive regulation of defense response	43/1083	385/18866	2.31904e-05	0.00208655	0.00186599	TAC1/ICAM3/PAK3/LAG3/CD209/COCH/CCL24/CLNK/IFNG/IL18RAP/CNR1/VAMP8/ZBP1/IDO1/AGT/NLRC5/TNFRSF11A/TTBK1/GBP5/SLAMF6/PYHIN1/IFI16/AIM2/IL15/SYK/CLEC4D/NOD2/MUC7/PTGER4/RASGRP1/TLR10/CADM1/FFAR3/LRRK2/CARD11/PSMB8/NCR3/HLA-F/MUC12/KLRK1/LTA/PSMB9/CCL5	43
GO:0002483	BP	GO:0002483	antigen processing and presentation of endogenous peptide antigen	7/1083	17/18866	2.35493e-05	0.00208655	0.00186599	HFE/AZGP1/B2M/TAP1/HLA-C/HLA-F/HLA-B	7
GO:0019885	BP	GO:0019885	antigen processing and presentation of endogenous peptide antigen via MHC class I	7/1083	17/18866	2.35493e-05	0.00208655	0.00186599	HFE/AZGP1/B2M/TAP1/HLA-C/HLA-F/HLA-B	7
GO:0043368	BP	GO:0043368	positive T cell selection	10/1083	36/18866	2.40517e-05	0.00209494	0.0018735	CD74/PTPRC/IL12RB1/FOXN1/ZAP70/CD3G/SLAMF6/CD3D/THEMIS/CD3E	10
GO:0019883	BP	GO:0019883	antigen processing and presentation of endogenous antigen	8/1083	24/18866	3.6984e-05	0.00311575	0.0027864	HFE/CD74/AZGP1/B2M/TAP1/HLA-C/HLA-F/HLA-B	8
GO:0045954	BP	GO:0045954	positive regulation of natural killer cell mediated cytotoxicity	8/1083	24/18866	3.6984e-05	0.00311575	0.0027864	LAG3/IL18RAP/SLAMF6/RASGRP1/CADM1/NCR3/HLA-F/KLRK1	8
GO:0046651	BP	GO:0046651	lymphocyte proliferation	34/1083	283/18866	3.77454e-05	0.0031286	0.0027979	CD38/TAC1/CD22/CD74/GAL/PTPRC/CD209/IL12RB1/TNFSF13B/IL7/RASAL3/ZAP70/ZP4/IRF1/CD70/IDO1/PTPN22/CHRNB2/FCRL3/IKZF3/CTLA4/IL15/SYK/TMIGD2/CD300A/RASGRP1/CLEC4G/SATB1/CLECL1/HLA-DRB1/IL27/CARD11/CD3E/CCL5	34
GO:0043270	BP	GO:0043270	positive regulation of ion transport	34/1083	284/18866	4.05724e-05	0.00326865	0.00292315	ABCB4/PRSS8/GAL/CACNG4/TESC/SCN1B/IFNG/FGF12/VAMP8/FABP3/WNK4/ATP1B2/CRACR2A/ACE2/SSTR4/AGT/TRPC3/CXCL9/TNFRSF11A/ATP1B1/GPD1L/SLC6A1/CHRNB2/LRRC52/CXCL10/CXCL11/ADRB2/LPAR3/TRPV2/RELN/GJC2/FXYD1/CCL5/CCL4	34
GO:0001909	BP	GO:0001909	leukocyte mediated cytotoxicity	18/1083	108/18866	4.07071e-05	0.00326865	0.00292315	PTPRC/LAG3/IL12RB1/GZMB/ULBP1/IL18RAP/AZGP1/SLAMF6/DNASE1L3/B2M/SERPINB9/RASGRP1/PRF1/CADM1/NCR3/HLA-F/KLRK1/HLA-B	18
GO:1903706	BP	GO:1903706	regulation of hemopoiesis	51/1083	498/18866	4.44629e-05	0.0035153	0.00314372	SCIN/CD74/RUNX3/GLI2/HOXA9/PTPRC/TESC/LAG3/IL12RB1/SFRP1/IL7/FOXN1/IFNG/CD83/LOX/ZAP70/STAT1/CD2/NFE2/PCK1/IRF1/FGL2/SPINK5/GPR55/CD27/CAMK4/FCRL3/IKZF3/IL20/CTLA4/IL15/DCSTAMP/SYK/PRKCB/B2M/RHOH/RASGRP1/GPR171/ZNF683/EGR3/HLA-DRB1/IL27/CARD11/HLA-DOA/PSMB8/MIR221/HLA-B/PSMB9/H3C6/H4C5/H3C10	51
GO:0010959	BP	GO:0010959	regulation of metal ion transport	43/1083	396/18866	4.53688e-05	0.00353258	0.00315917	HECW1/HFE/PRSS8/GAL/KCNN2/TESC/SCN1B/GCK/RCVRN/IFNG/FGF12/WNK4/ATP1B2/CRACR2A/DYSF/AGT/FXYD2/TRPC3/CXCL9/METTL21C/ATP1B1/GPD1L/JPH3/CLIC2/KCNS2/FCRL3/LRRC52/GEM/TMC1/B2M/CXCL10/CXCL11/ADRB2/LPAR3/CACNB4/PDE4B/TRPV2/PLN/GJC2/FXYD7/FXYD1/CCL5/CCL4	43
GO:0070665	BP	GO:0070665	positive regulation of leukocyte proliferation	22/1083	150/18866	4.65612e-05	0.00353769	0.00316374	CD38/TAC1/CD74/PTPRC/CD209/IL12RB1/TNFSF13B/IL7/RASAL3/ZAP70/ZP4/CD70/PTPN22/CHRNB2/FCRL3/IL15/SYK/TMIGD2/CLECL1/CARD11/CD3E/CCL5	22
GO:0032943	BP	GO:0032943	mononuclear cell proliferation	34/1083	286/18866	4.68112e-05	0.00353769	0.00316374	CD38/TAC1/CD22/CD74/GAL/PTPRC/CD209/IL12RB1/TNFSF13B/IL7/RASAL3/ZAP70/ZP4/IRF1/CD70/IDO1/PTPN22/CHRNB2/FCRL3/IKZF3/CTLA4/IL15/SYK/TMIGD2/CD300A/RASGRP1/CLEC4G/SATB1/CLECL1/HLA-DRB1/IL27/CARD11/CD3E/CCL5	34
GO:0002695	BP	GO:0002695	negative regulation of leukocyte activation	25/1083	184/18866	5.39835e-05	0.00397571	0.00355546	HFE/CD74/RUNX3/GAL/CST7/PTPRC/LAG3/FOXF1/SFRP1/FGL1/CLNK/CNR1/LAX1/IL13RA2/IRF1/FGL2/IDO1/SYT11/PTPN22/CTLA4/CD300A/TBC1D10C/CLEC4G/HLA-DRB1/HLA-F	25
GO:1904062	BP	GO:1904062	regulation of cation transmembrane transport	39/1083	349/18866	5.41544e-05	0.00397571	0.00355546	HECW1/RASGRF1/GAL/CACNG5/CACNG4/KCNN2/TESC/SCN1B/IFNG/FGF12/TWIST1/WNK4/ATP1B2/CRACR2A/ACE2/DYSF/AGT/FXYD2/CXCL9/METTL21C/ATP1B1/GPD1L/JPH3/CLIC2/KCNS2/LRRC52/GEM/TMC1/CXCL10/CXCL11/ADRB2/CACNB4/GRIN2A/PDE4B/RELN/PLN/GJC2/FXYD7/FXYD1	39
GO:0031295	BP	GO:0031295	T cell costimulation	12/1083	56/18866	6.41564e-05	0.00464366	0.00415281	PAK3/GRAP2/TNFSF13B/EFNB3/CTLA4/TMIGD2/LCK/BTLA/PDCD1/CARD11/CD3E/KLRK1	12
GO:0002703	BP	GO:0002703	regulation of leukocyte mediated immunity	27/1083	211/18866	7.94021e-05	0.00566732	0.00506827	HFE/PTPRC/LAG3/IL12RB1/FOXF1/CLNK/IL18RAP/VAMP8/IL13RA2/CD96/AZGP1/SLAMF6/DNASE1L3/SYK/B2M/NOD2/CD300A/SERPINB9/RASGRP1/FUT7/CLEC4G/CADM1/NCR3/HLA-F/KLRK1/LTA/HLA-B	27
GO:0042269	BP	GO:0042269	regulation of natural killer cell mediated cytotoxicity	10/1083	41/18866	8.16227e-05	0.00574602	0.00513864	LAG3/IL18RAP/SLAMF6/SERPINB9/RASGRP1/CADM1/NCR3/HLA-F/KLRK1/HLA-B	10
GO:0045088	BP	GO:0045088	regulation of innate immune response	35/1083	307/18866	8.60051e-05	0.0059727	0.00534137	BIRC3/ICAM3/PAK3/LAG3/CD209/COCH/CLNK/IFNG/STAT1/IL18RAP/ZBP1/IRF1/PTPN22/NLRC5/CD96/GBP5/SLAMF6/PYHIN1/IFI16/AIM2/SYK/CLEC4D/SERPINB9/MUC7/RASGRP1/CADM1/CARD11/PSMB8/NCR3/HLA-F/MUC12/KLRK1/HLA-B/PSMB9/CCL5	35
GO:0002460	BP	GO:0002460	adaptive immune response based on somatic recombination of immune receptors built from immunoglobulin superfamily domains	40/1083	370/18866	9.09018e-05	0.00615075	0.00550059	HFE/CD74/PTPRC/IL12RB1/SLA2/TNFSF13B/IL18RAP/IL13RA2/CD70/FGL2/MYO1G/IL18BP/CD27/RORC/CD8A/C1R/AZGP1/SLAMF6/B2M/C1QB/HLA-DQB1/FUT7/PRF1/C1S/CLEC4G/HLA-DRB1/IL27/HLA-F/IGLV7-43/IGLC3/TRBC2/IGHM/IGHV3-15/IGHV3-33/C4B/LTA/HLA-B/IGKV3-20/C4A/IGKV2-29	40
GO:0031294	BP	GO:0031294	lymphocyte costimulation	12/1083	58/18866	9.21533e-05	0.00615075	0.00550059	PAK3/GRAP2/TNFSF13B/EFNB3/CTLA4/TMIGD2/LCK/BTLA/PDCD1/CARD11/CD3E/KLRK1	12
GO:0010765	BP	GO:0010765	positive regulation of sodium ion transport	9/1083	34/18866	9.31306e-05	0.00615075	0.00550059	PRSS8/TESC/SCN1B/FGF12/WNK4/ATP1B2/ATP1B1/GPD1L/FXYD1	9
GO:0045089	BP	GO:0045089	positive regulation of innate immune response	27/1083	213/18866	9.33564e-05	0.00615075	0.00550059	ICAM3/PAK3/LAG3/CD209/COCH/CLNK/IL18RAP/ZBP1/NLRC5/GBP5/SLAMF6/PYHIN1/IFI16/AIM2/SYK/CLEC4D/MUC7/RASGRP1/CADM1/CARD11/PSMB8/NCR3/HLA-F/MUC12/KLRK1/PSMB9/CCL5	27
GO:0051963	BP	GO:0051963	regulation of synapse assembly	17/1083	107/18866	0.000121926	0.00793138	0.00709301	LRRC4B/ADGRB3/AMIGO2/NTRK3/LRRTM2/NTRK2/PTPRD/GHRL/CHRNB2/IL1RAPL1/LINGO2/SLITRK4/ROBO2/SLITRK2/THBS2/SLIT1/VSTM5	17
GO:0022898	BP	GO:0022898	regulation of transmembrane transporter activity	32/1083	276/18866	0.000124229	0.00798014	0.00713661	HECW1/RASGRF1/GAL/CACNG5/CACNG4/TESC/SCN1B/IFNG/FGF12/TWIST1/WNK4/ATP1B2/CRACR2A/ACE2/CHRM3/DYSF/FXYD2/ATP1B1/GPD1L/JPH3/CLIC2/KCNS2/LRRC52/GEM/ADRB2/CACNB4/GRIN2A/PDE4B/RELN/PLN/FXYD7/FXYD1	32
GO:0070661	BP	GO:0070661	leukocyte proliferation	35/1083	313/18866	0.000126524	0.00802727	0.00717876	CD38/TAC1/CD22/CD74/GAL/PTPRC/CD209/IL12RB1/TNFSF13B/IL7/RASAL3/ZAP70/ZP4/IRF1/CD70/IDO1/PTPN22/KIT/CHRNB2/FCRL3/IKZF3/CTLA4/IL15/SYK/TMIGD2/CD300A/RASGRP1/CLEC4G/SATB1/CLECL1/HLA-DRB1/IL27/CARD11/CD3E/CCL5	35
GO:0007409	BP	GO:0007409	axonogenesis	48/1083	482/18866	0.000145116	0.00909452	0.0081332	SEMA3B/FSTL4/NGFR/GLI2/SEMA3C/PAK3/MAG/SCN1B/COBL/EFNB3/UNC5A/ITGA4/PLPPR4/SPP1/LGR6/BMPR1B/NTRK3/GRB7/GDF7/EPHA5/GFRA3/NTRK2/NCAM1/FEZ1/PTPRO/GFRA1/KIF5A/UNC5D/CHRNB2/PLXNB1/ADCY1/MAP1A/KIF5C/RHOH/GFRA2/ROBO1/NPTX1/LPAR3/DAB1/SLITRK4/POU3F2/ROBO2/SLITRK2/SLIT1/TRPV2/RELN/L1CAM/TUBB3	48
GO:0032409	BP	GO:0032409	regulation of transporter activity	33/1083	291/18866	0.000149718	0.00926992	0.00829005	HECW1/PON1/RASGRF1/GAL/CACNG5/CACNG4/TESC/SCN1B/IFNG/FGF12/TWIST1/WNK4/ATP1B2/CRACR2A/ACE2/CHRM3/DYSF/FXYD2/ATP1B1/GPD1L/JPH3/CLIC2/KCNS2/LRRC52/GEM/ADRB2/CACNB4/GRIN2A/PDE4B/RELN/PLN/FXYD7/FXYD1	33
GO:0042267	BP	GO:0042267	natural killer cell mediated cytotoxicity	12/1083	61/18866	0.000153564	0.00939484	0.00840178	LAG3/GZMB/ULBP1/IL18RAP/SLAMF6/SERPINB9/RASGRP1/CADM1/NCR3/HLA-F/KLRK1/HLA-B	12
GO:0050808	BP	GO:0050808	synapse organization	44/1083	433/18866	0.000172959	0.0104569	0.00935156	CDH1/CTTNBP2/PAK3/PCDHB4/NRXN2/PCDHB2/PCDHB6/DLGAP3/PCDHB10/PDZRN3/LRRC4B/ADGRB3/DOCK10/ITPKA/AMIGO2/NTRK3/LRRTM2/NTRK2/INA/PTPRO/PTPRD/GHRL/SLC6A1/CHRNB2/PLXNB1/IL1RAPL1/CTNND2/NEUROD2/C1QB/LINGO2/DOK7/PCDHB9/SLITRK4/CACNB4/ROBO2/SLITRK2/THBS2/SLIT1/LRRK2/RELN/L1CAM/VSTM5/PCDHGC4/PCDHB16	44
GO:0030888	BP	GO:0030888	regulation of B cell proliferation	12/1083	62/18866	0.000180603	0.0107921	0.00965133	CD38/CD22/CD74/PTPRC/TNFSF13B/IL7/CHRNB2/FCRL3/IKZF3/CTLA4/CD300A/CARD11	12
GO:0002831	BP	GO:0002831	regulation of response to biotic stimulus	42/1083	409/18866	0.000192111	0.0113478	0.0101483	BIRC3/ICAM3/PAK3/LAG3/CD209/IL12RB1/COCH/CLNK/IFNG/STAT1/IL18RAP/ZBP1/IRF1/FGL2/SYT11/SPINK5/PTPN22/NLRC5/CD96/GBP5/SLAMF6/PYHIN1/IFI16/AIM2/IL15/SYK/HTRA1/CLEC4D/SERPINB9/MUC7/RASGRP1/CADM1/IL27/CARD11/PSMB8/NCR3/HLA-F/MUC12/KLRK1/HLA-B/PSMB9/CCL5	42
GO:0042102	BP	GO:0042102	positive regulation of T cell proliferation	16/1083	101/18866	0.000197888	0.0115562	0.0103347	PTPRC/CD209/IL12RB1/TNFSF13B/RASAL3/ZAP70/ZP4/CD70/PTPN22/IL15/SYK/TMIGD2/CLECL1/CARD11/CD3E/CCL5	16
GO:0045582	BP	GO:0045582	positive regulation of T cell differentiation	15/1083	92/18866	0.00022414	0.0129051	0.011541	CD74/RUNX3/GLI2/PTPRC/IL12RB1/IL7/IFNG/CD83/ZAP70/PCK1/CD27/SYK/RHOH/RASGRP1/EGR3	15
GO:0010769	BP	GO:0010769	regulation of cell morphogenesis involved in differentiation	34/1083	310/18866	0.000226946	0.0129051	0.011541	HECW1/SEMA3B/FSTL4/NGFR/LIMS2/SEMA3C/PAK3/MAG/EFNB3/NEDD9/GBP1/SPP1/POSTN/ADGRB3/ITPKA/NTRK3/NTRK2/PTPRO/PTPRD/TNIK/CHRNB2/PLXNB1/IL1RAPL1/SDC2/ROBO1/HAS2/LPAR3/DAB1/POU3F2/ROBO2/TRPV2/LRRK2/RELN/L1CAM	34
GO:0010863	BP	GO:0010863	positive regulation of phospholipase C activity	10/1083	46/18866	0.000228521	0.0129051	0.011541	ESR1/ITK/AGT/GPR55/HTR2B/NTRK3/NTRK2/KIT/ANG/NTF4	10
GO:0042129	BP	GO:0042129	regulation of T cell proliferation	22/1083	167/18866	0.000232205	0.0129651	0.0115946	PTPRC/CD209/IL12RB1/TNFSF13B/RASAL3/ZAP70/ZP4/IRF1/CD70/IDO1/PTPN22/CTLA4/IL15/SYK/TMIGD2/CLEC4G/CLECL1/HLA-DRB1/IL27/CARD11/CD3E/CCL5	22
GO:0002920	BP	GO:0002920	regulation of humoral immune response	19/1083	134/18866	0.000234628	0.0129651	0.0115946	CD5L/CPB2/PTPRC/VTN/ZP4/CPN1/SPINK5/C1R/C1QB/C1S/PROS1/IGLV7-43/IGLC3/IGHV3-33/C4B/LTA/IGKV3-20/C4A/IGKV2-29	19
GO:0006874	BP	GO:0006874	cellular calcium ion homeostasis	45/1083	456/18866	0.000282825	0.0154621	0.0138277	CD38/TAC1/P2RY10/PTPRC/ESR1/KCTD17/TRPA1/CDH23/CCKBR/FASLG/CNR1/ITPR2/GPR18/AGT/GPR55/HTR2B/EDNRB/TRPC3/CXCL9/METTL21C/ATP1B1/GPR17/ACKR2/GPR174/JPH3/CLIC2/GHRL/CCR5/PTH1R/PRKCB/GALR1/CXCL10/CXCL11/CD52/LPAR3/PTGER4/CALB2/CXCR6/CYSLTR1/LCK/GRIN2A/CXCR3/TRPV2/PLN/CCL5	45
GO:0032412	BP	GO:0032412	regulation of ion transmembrane transporter activity	30/1083	265/18866	0.00030212	0.0163431	0.0146156	HECW1/RASGRF1/GAL/CACNG5/CACNG4/TESC/SCN1B/IFNG/FGF12/WNK4/ATP1B2/CRACR2A/CHRM3/DYSF/FXYD2/ATP1B1/GPD1L/JPH3/CLIC2/KCNS2/LRRC52/GEM/ADRB2/CACNB4/GRIN2A/PDE4B/RELN/PLN/FXYD7/FXYD1	30
GO:0045621	BP	GO:0045621	positive regulation of lymphocyte differentiation	16/1083	105/18866	0.000312483	0.0167276	0.0149594	CD74/RUNX3/GLI2/PTPRC/IL12RB1/IL7/IFNG/CD83/ZAP70/PCK1/CD27/IL15/SYK/RHOH/RASGRP1/EGR3	16
GO:1903522	BP	GO:1903522	regulation of blood circulation	33/1083	303/18866	0.000316769	0.0167822	0.0150083	CD38/TAC1/CELF2/CACNG5/CACNG4/KCNN2/MYH7/DSP/ATP1A3/SCN1B/SLC1A1/ITPR2/DOCK4/ATP1B2/ACE2/CHRM3/AGT/KCNK1/GATA4/FXYD2/ATP1B1/GPD1L/CLIC2/GHRL/MYL3/JUP/CACNB4/ADRA2C/PDE4B/PLN/SMTNL1/FXYD7/FXYD1	33
GO:1900274	BP	GO:1900274	regulation of phospholipase C activity	10/1083	48/18866	0.000330343	0.0173228	0.0154917	ESR1/ITK/AGT/GPR55/HTR2B/NTRK3/NTRK2/KIT/ANG/NTF4	10
GO:0032102	BP	GO:0032102	negative regulation of response to external stimulus	43/1083	433/18866	0.000334799	0.0173791	0.0155421	SEMA3B/NR1H4/SEMA3C/CST7/CPB2/PTPRC/FOXF1/VTN/ADTRP/FNDC4/IL1R2/SPP1/GPR18/TSPAN8/FGL2/SYT11/SPINK5/NT5E/KLF4/NLRC5/SLC6A3/SIGLEC10/GPR17/PTPRO/CD96/GHRL/IFI16/HTRA1/ROBO1/SERPINB9/PTGER4/ABCD2/NLRP6/C1QTNF12/PROS1/ROBO2/RTN4RL1/HLA-DRB1/HLA-F/MIR187/MIR221/KLRK1/HLA-B	43
GO:0043383	BP	GO:0043383	negative T cell selection	5/1083	12/18866	0.000348311	0.0175751	0.0157174	CD74/PTPRC/ZAP70/THEMIS/CD3E	5
GO:0046632	BP	GO:0046632	alpha-beta T cell differentiation	16/1083	106/18866	0.000348792	0.0175751	0.0157174	RUNX3/IL12RB1/IFNG/CD83/ITK/ZAP70/GPR18/IRF1/RORC/SLAMF6/SYK/PTGER4/ZNF683/FUT7/SATB1/IL27	16
GO:0042098	BP	GO:0042098	T cell proliferation	24/1083	195/18866	0.000348835	0.0175751	0.0157174	PTPRC/CD209/IL12RB1/TNFSF13B/RASAL3/ZAP70/ZP4/IRF1/CD70/IDO1/PTPN22/CTLA4/IL15/SYK/TMIGD2/RASGRP1/CLEC4G/SATB1/CLECL1/HLA-DRB1/IL27/CARD11/CD3E/CCL5	24
GO:0050866	BP	GO:0050866	negative regulation of cell activation	25/1083	207/18866	0.000354793	0.017635	0.0157709	HFE/CD74/RUNX3/GAL/CST7/PTPRC/LAG3/FOXF1/SFRP1/FGL1/CLNK/CNR1/LAX1/IL13RA2/IRF1/FGL2/IDO1/SYT11/PTPN22/CTLA4/CD300A/TBC1D10C/CLEC4G/HLA-DRB1/HLA-F	25
GO:0033077	BP	GO:0033077	T cell differentiation in thymus	13/1083	76/18866	0.000356886	0.017635	0.0157709	CD74/GLI2/PTPRC/FOXN1/ZAP70/CAMK4/CD3G/B2M/CD3D/RASGRP1/EGR3/CARD11/CD3E	13
GO:0046634	BP	GO:0046634	regulation of alpha-beta T cell activation	15/1083	97/18866	0.00040507	0.0196905	0.0176092	HFE/RUNX3/PTPRC/IL12RB1/RASAL3/IFNG/CD83/ZAP70/IRF1/PTPN22/SYK/CD300A/ZNF683/IL27/CD3E	15
GO:0007422	BP	GO:0007422	peripheral nervous system development	13/1083	77/18866	0.000407186	0.0196905	0.0176092	ADAM22/RUNX3/FA2H/PMP22/EDNRB/NTRK3/GFRA3/NTRK2/LGI4/CLDN1/EGR3/POU3F2/NTF4	13
GO:0007188	BP	GO:0007188	adenylate cyclase-modulating G protein-coupled receptor signaling pathway	27/1083	233/18866	0.00040998	0.0196905	0.0176092	RGS1/GNAT1/CNR1/ADM2/GNAZ/SSTR4/CHRM3/ADGRB3/CXCL9/GNAL/ADGRG5/PTH1R/ADCY1/GPR176/GALR1/CXCL10/CXCL11/ADRB2/LPAR3/PTGER4/ADGRE1/MC5R/HTR1A/GRM8/ADRA2C/FFAR3/PLN	27
GO:0009581	BP	GO:0009581	detection of external stimulus	19/1083	141/18866	0.000453161	0.0214417	0.0191752	COL11A1/NGFR/TRPM3/FOXF1/TRPA1/RCVRN/GNAT1/OPN4/PHF24/AIPL1/PDE6A/CRB1/TRPC3/PIEZO2/KIT/TMC1/GNGT2/JUP/RRH	19
GO:0048706	BP	GO:0048706	embryonic skeletal system development	18/1083	130/18866	0.000454785	0.0214417	0.0191752	HOXA11/ALX4/COL11A1/HOXA9/WNT11/HOXB6/HYAL1/TWIST1/TFAP2A/COL2A1/ALX3/HOXD4/HOXC5/DMRT2/HOXC9/SULF2/HOXC6/HOXC4	18
GO:0050707	BP	GO:0050707	regulation of cytokine secretion	11/1083	59/18866	0.000466763	0.0217168	0.0194212	IFNG/SYT11/HTR2B/SORL1/SYK/PTGER4/TLR10/TLR1/CIDEA/CADM1/CLEC9A	11
GO:0019933	BP	GO:0019933	cAMP-mediated signaling	24/1083	199/18866	0.000470838	0.0217168	0.0194212	GAL/RAPGEF3/CNR1/SOX9/ADM2/SSTR4/ADGRB3/CXCL9/GNAL/EPHA5/ADGRG5/PTH1R/ADCY1/GALR1/CXCL10/CXCL11/ADRB2/LPAR3/PTGER4/PDE3A/ADGRE1/MC5R/ADRA2C/PLN	24
GO:0002699	BP	GO:0002699	positive regulation of immune effector process	26/1083	223/18866	0.000473298	0.0217168	0.0194212	CD74/PTPRC/LAG3/IL12RB1/FOXF1/CLNK/IFNG/IL18RAP/VAMP8/IL13RA2/PCK1/PTPN22/AZGP1/SLAMF6/SYK/B2M/NOD2/CD300A/RASGRP1/CADM1/FFAR3/NCR3/HLA-F/KLRK1/LTA/HLA-B	26
GO:0055074	BP	GO:0055074	calcium ion homeostasis	45/1083	468/18866	0.000496767	0.0225919	0.0202039	CD38/TAC1/P2RY10/PTPRC/ESR1/KCTD17/TRPA1/CDH23/CCKBR/FASLG/CNR1/ITPR2/GPR18/AGT/GPR55/HTR2B/EDNRB/TRPC3/CXCL9/METTL21C/ATP1B1/GPR17/ACKR2/GPR174/JPH3/CLIC2/GHRL/CCR5/PTH1R/PRKCB/GALR1/CXCL10/CXCL11/CD52/LPAR3/PTGER4/CALB2/CXCR6/CYSLTR1/LCK/GRIN2A/CXCR3/TRPV2/PLN/CCL5	45
GO:0046629	BP	GO:0046629	gamma-delta T cell activation	6/1083	19/18866	0.0005012	0.0225935	0.0202053	PTPRC/ITK/GPR18/SYK/NOD2/EGR3	6
GO:0019935	BP	GO:0019935	cyclic-nucleotide-mediated signaling	26/1083	224/18866	0.000506942	0.0226537	0.0202591	GAL/RAPGEF3/CNR1/SOX9/ADM2/SSTR4/ADGRB3/HTR2B/EDNRB/CXCL9/GNAL/EPHA5/ADGRG5/PTH1R/ADCY1/GALR1/CXCL10/CXCL11/ADRB2/LPAR3/PTGER4/PDE3A/ADGRE1/MC5R/ADRA2C/PLN	26
GO:0002706	BP	GO:0002706	regulation of lymphocyte mediated immunity	20/1083	154/18866	0.000528141	0.0233976	0.0209244	HFE/PTPRC/LAG3/IL12RB1/CLNK/IL18RAP/CD96/AZGP1/SLAMF6/B2M/SERPINB9/RASGRP1/FUT7/CLEC4G/CADM1/NCR3/HLA-F/KLRK1/LTA/HLA-B	20
GO:0050848	BP	GO:0050848	regulation of calcium-mediated signaling	15/1083	100/18866	0.000564878	0.0248112	0.0221886	CD22/LMCD1/SLA2/ZAP70/FHL2/GBP1/JPH3/CLIC2/SYK/NEUROD2/TBC1D10C/LRRK2/PLN/CD3E/CCL4	15
GO:0007187	BP	GO:0007187	G protein-coupled receptor signaling pathway, coupled to cyclic nucleotide second messenger	29/1083	263/18866	0.000582465	0.0253668	0.0226855	RGS1/GNAT1/CNR1/ADM2/GNAZ/SSTR4/CHRM3/ADGRB3/AGT/HTR2B/CXCL9/GNAL/ADGRG5/PTH1R/ADCY1/GPR176/GALR1/CXCL10/CXCL11/ADRB2/LPAR3/PTGER4/ADGRE1/MC5R/HTR1A/GRM8/ADRA2C/FFAR3/PLN	29
GO:0009582	BP	GO:0009582	detection of abiotic stimulus	19/1083	144/18866	0.000590962	0.0255206	0.022823	TAC1/COL11A1/NGFR/TRPM3/TRPA1/RCVRN/GNAT1/OPN4/PHF24/AIPL1/PDE6A/CRB1/TRPC3/PIEZO2/KIT/TMC1/GNGT2/JUP/RRH	19
GO:0051047	BP	GO:0051047	positive regulation of secretion	35/1083	340/18866	0.000607195	0.0260031	0.0232545	CD38/TAC1/SCIN/HFE/NR1H4/GAL/CPB2/MYOM1/GCK/IFNG/CNR1/VAMP8/SPP1/SSTR4/GRP/AGT/HTR2B/EDNRB/SORL1/TNFRSF11A/GHRL/SLC6A1/CHRNB2/SYK/GALR1/PRRT2/GPR27/PTGER4/PRL/CADM1/C1QTNF12/HLA-DRB1/CLEC9A/HLA-F/ANG	35
GO:0016339	BP	GO:0016339	calcium-dependent cell-cell adhesion via plasma membrane cell adhesion molecules	9/1083	43/18866	0.000628568	0.026696	0.0238741	CDH7/PCDHB4/CDH23/PCDHB2/PCDHB6/PCDHB10/PCDHB9/PCDHGB4/PCDHB16	9
GO:0002704	BP	GO:0002704	negative regulation of leukocyte mediated immunity	10/1083	52/18866	0.00064875	0.0273273	0.0244387	HFE/PTPRC/FOXF1/IL13RA2/CD96/CD300A/SERPINB9/CLEC4G/HLA-F/HLA-B	10
GO:0002577	BP	GO:0002577	regulation of antigen processing and presentation	6/1083	20/18866	0.00068145	0.0284713	0.0254618	HFE/CD74/FGL2/NOD2/HLA-DOA/HLA-DOB	6
GO:0034765	BP	GO:0034765	regulation of ion transmembrane transport	46/1083	489/18866	0.000692365	0.0286941	0.025661	HECW1/RASGRF1/GAL/CACNG5/CACNG4/KCNN2/TESC/HCN2/SCN1B/IFNG/FGF12/TWIST1/WNK4/ATP1B2/CRACR2A/ACE2/CHRM3/DYSF/AGT/FXYD2/CXCL9/METTL21C/ATP1B1/KCNK13/GPD1L/JPH3/CLIC2/KCNS2/KCNJ6/LRRC52/GEM/TMC1/KCNV2/CXCL10/CXCL11/ADRB2/KCNS3/KCNA3/CACNB4/GRIN2A/PDE4B/RELN/PLN/GJC2/FXYD7/FXYD1	46
GO:0010518	BP	GO:0010518	positive regulation of phospholipase activity	11/1083	62/18866	0.000724353	0.0296039	0.0264747	ESR1/ITK/AGT/GPR55/HTR2B/NTRK3/NTRK2/KIT/ANG/NTF4/CCL5	11
GO:0022612	BP	GO:0022612	gland morphogenesis	17/1083	124/18866	0.00072584	0.0296039	0.0264747	LIMS2/GLI2/SEMA3C/CPB2/PGR/ESR1/SFRP1/FGL1/AREG/SOX9/FOXA1/GDF7/HOXB13/SOSTDC1/SULF2/DDR1/CRIP1	17
GO:0046883	BP	GO:0046883	regulation of hormone secretion	29/1083	267/18866	0.000742886	0.0300606	0.0268831	CD38/TAC1/HFE/NR1H4/GAL/RAPGEF3/SFRP1/GCK/IFNG/CNR1/VAMP8/SPP1/ITPR2/FOXA2/GRP/AGT/STXBP5L/EPHA5/GHRL/GALR1/SCG5/KCNS3/GPR27/HTR1A/ADRA2C/C1QTNF12/FFAR3/HLA-DRB1/CCL5	29
GO:0007189	BP	GO:0007189	adenylate cyclase-activating G protein-coupled receptor signaling pathway	19/1083	147/18866	0.000763523	0.0306543	0.027414	CNR1/ADM2/SSTR4/ADGRB3/CXCL9/GNAL/ADGRG5/PTH1R/ADCY1/GALR1/CXCL10/CXCL11/ADRB2/LPAR3/PTGER4/ADGRE1/MC5R/ADRA2C/PLN	19
GO:0035637	BP	GO:0035637	multicellular organismal signaling	24/1083	206/18866	0.000775577	0.0307117	0.0274653	CACNG5/CACNG4/KCNN2/DSP/MYH14/ATP1A3/MAG/SCN1B/FGF12/ITPR2/ATP1B2/ACE2/AGT/KCNK1/FXYD2/NTRK3/ATP1B1/NTRK2/GHRL/JUP/CACNB4/PLN/FXYD7/FXYD1	24
GO:0048002	BP	GO:0048002	antigen processing and presentation of peptide antigen	23/1083	194/18866	0.000776906	0.0307117	0.0274653	HFE/CD74/LAG3/CD209/CD207/VAMP8/FCGR1A/KIF5A/AZGP1/B2M/TAP1/HLA-DQB1/HLA-DRB1/FCGR1B/HLA-DRB5/HLA-DOA/PSMB8/HLA-DRA/HLA-C/HLA-F/HLA-B/PSMB9/HLA-DOB	23
GO:0072503	BP	GO:0072503	cellular divalent inorganic cation homeostasis	46/1083	492/18866	0.000787621	0.0308976	0.0276316	CD38/TAC1/P2RY10/PTPRC/ESR1/KCTD17/TRPA1/CDH23/CCKBR/FASLG/CNR1/ITPR2/GPR18/AGT/GPR55/HTR2B/EDNRB/TRPC3/CXCL9/METTL21C/ATP1B1/GPR17/ACKR2/GPR174/JPH3/CLIC2/GHRL/CCR5/PTH1R/PRKCB/GALR1/CXCL10/CXCL11/CD52/LPAR3/PTGER4/CALB2/CXCR6/CYSLTR1/LCK/GRIN2A/CXCR3/TRPV2/PLN/MT1M/CCL5	46
GO:1902107	BP	GO:1902107	positive regulation of leukocyte differentiation	20/1083	159/18866	0.00079632	0.0310022	0.0277251	CD74/RUNX3/GLI2/PTPRC/TESC/IL12RB1/IL7/IFNG/CD83/ZAP70/PCK1/CD27/IL20/IL15/DCSTAMP/SYK/RHOH/RASGRP1/EGR3/HLA-DRB1	20
GO:0060512	BP	GO:0060512	prostate gland morphogenesis	7/1083	28/18866	0.000822243	0.0315639	0.0282275	GLI2/ESR1/SFRP1/SOX9/FOXA1/HOXB13/CRIP1	7
GO:0046633	BP	GO:0046633	alpha-beta T cell proliferation	8/1083	36/18866	0.000823032	0.0315639	0.0282275	PTPRC/RASAL3/ZAP70/IRF1/PTPN22/IL15/SYK/CD3E	8
GO:0050731	BP	GO:0050731	positive regulation of peptidyl-tyrosine phosphorylation	23/1083	195/18866	0.000834148	0.0317532	0.0283968	CD74/PTPRC/DOCK3/VTN/AREG/IFNG/NEDD9/AGT/ENPP2/NTRK2/CTF1/FCGR1A/GHRL/KIT/IL20/IL15/SYK/DOK7/RELN/CD3E/MIR221/CNTF/CCL5	23
GO:0007200	BP	GO:0007200	phospholipase C-activating G protein-coupled receptor signaling pathway	15/1083	104/18866	0.000859187	0.0320447	0.0286575	P2RY10/ESR1/CCKBR/GPR18/GNG13/GRP/AGT/GPR55/HTR2B/EDNRB/GPR17/GPR174/PTH1R/GPR27/LPAR3	15
GO:0010517	BP	GO:0010517	regulation of phospholipase activity	12/1083	73/18866	0.000860108	0.0320447	0.0286575	ESR1/ITK/ANGPTL3/AGT/GPR55/HTR2B/NTRK3/NTRK2/KIT/ANG/NTF4/CCL5	12
GO:0019882	BP	GO:0019882	antigen processing and presentation	26/1083	232/18866	0.000860512	0.0320447	0.0286575	HFE/CD74/LAG3/CD209/CD207/VAMP8/FGL2/FCGR1A/CD8A/KIF5A/AZGP1/B2M/NOD2/TAP1/HLA-DQB1/HLA-DRB1/FCGR1B/HLA-DRB5/HLA-DOA/PSMB8/HLA-DRA/HLA-C/HLA-F/HLA-B/PSMB9/HLA-DOB	26
GO:0032609	BP	GO:0032609	interferon-gamma production	16/1083	115/18866	0.000874506	0.0323315	0.028914	NR1H4/IL12RB2/IL12RB1/ITK/IL18RAP/CD2/PTPN22/CD96/SLAMF6/RASGRP1/PDE4B/HLA-DRB1/IL27/CD3E/KLRK1/LTA	16
GO:0046641	BP	GO:0046641	positive regulation of alpha-beta T cell proliferation	6/1083	21/18866	0.00090805	0.0333319	0.0298086	PTPRC/RASAL3/ZAP70/PTPN22/SYK/CD3E	6
GO:0051591	BP	GO:0051591	response to cAMP	14/1083	94/18866	0.000915755	0.0333763	0.0298483	CPS1/PTPRN/RAPGEF3/HCN2/SLC5A5/AREG/STAT1/ITPR2/PCK1/VGF/CDO1/SLC6A3/PKLR/STAR	14
GO:0002705	BP	GO:0002705	positive regulation of leukocyte mediated immunity	18/1083	138/18866	0.000932988	0.033765	0.0301959	PTPRC/LAG3/IL12RB1/CLNK/IL18RAP/VAMP8/AZGP1/SLAMF6/SYK/B2M/NOD2/RASGRP1/CADM1/NCR3/HLA-F/KLRK1/LTA/HLA-B	18
GO:0007411	BP	GO:0007411	axon guidance	30/1083	284/18866	0.000956258	0.0343651	0.0307326	SEMA3B/NGFR/GLI2/SEMA3C/SCN1B/EFNB3/UNC5A/LGR6/BMPR1B/GRB7/GDF7/EPHA5/GFRA3/NCAM1/FEZ1/PTPRO/GFRA1/KIF5A/UNC5D/PLXNB1/KIF5C/RHOH/GFRA2/ROBO1/DAB1/ROBO2/SLIT1/RELN/L1CAM/TUBB3	30
GO:0071356	BP	GO:0071356	cellular response to tumor necrosis factor	31/1083	297/18866	0.000966862	0.0345049	0.0308576	NR1H4/BIRC3/FAS/TNFSF13B/SFRP1/CLIP3/CCL24/KRT18/HYAL1/STAT1/GBP3/GBP1/PCK1/CD70/POSTN/CASP1/CD27/TNFRSF11A/GBP2/CLDN1/AIM2/DCSTAMP/SYK/KRT8/HAS2/PSMB8/LTA/LTB/PSMB9/CCL5/CCL4	31
GO:0048732	BP	GO:0048732	gland development	42/1083	443/18866	0.000995219	0.0351876	0.0314681	HFE/CPS1/CDH1/TG/LIMS2/GLI2/SEMA3C/HOXA9/CPB2/PGR/WNT11/ESR1/FA2H/FOXF1/SFRP1/FGL1/COBL/VTN/FOXN1/AREG/CCKBR/SLC29A1/PCK1/SOX9/FOXA1/CDO1/TNFRSF11A/SLC6A3/GDF7/PAM/DNAAF1/HOXB13/AK4/CLDN1/PITX2/ROBO1/SOSTDC1/PRL/POU3F2/SULF2/DDR1/CRIP1	42
GO:0019722	BP	GO:0019722	calcium-mediated signaling	25/1083	222/18866	0.000999686	0.0351876	0.0314681	CD22/LMCD1/PTPRC/SLA2/ZAP70/FHL2/GBP1/CHRM3/HTR2B/EDNRB/ATP1B1/ACKR2/JPH3/CLIC2/CCR5/SYK/NEUROD2/CXCR6/TBC1D10C/GRIN2A/CXCR3/LRRK2/PLN/CD3E/CCL4	25
GO:0097485	BP	GO:0097485	neuron projection guidance	30/1083	285/18866	0.00101171	0.0353686	0.03163	SEMA3B/NGFR/GLI2/SEMA3C/SCN1B/EFNB3/UNC5A/LGR6/BMPR1B/GRB7/GDF7/EPHA5/GFRA3/NCAM1/FEZ1/PTPRO/GFRA1/KIF5A/UNC5D/PLXNB1/KIF5C/RHOH/GFRA2/ROBO1/DAB1/ROBO2/SLIT1/RELN/L1CAM/TUBB3	30
GO:2000649	BP	GO:2000649	regulation of sodium ion transmembrane transporter activity	10/1083	55/18866	0.00102629	0.0354812	0.0317307	HECW1/TESC/SCN1B/FGF12/WNK4/FXYD2/ATP1B1/GPD1L/FXYD7/FXYD1	10
GO:0045577	BP	GO:0045577	regulation of B cell differentiation	7/1083	29/18866	0.00103074	0.0354812	0.0317307	SFRP1/IL7/CD27/FCRL3/IKZF3/SYK/CARD11	7
GO:0050769	BP	GO:0050769	positive regulation of neurogenesis	45/1083	485/18866	0.00104456	0.0354812	0.0317307	NGFR/GLI2/PAK3/DCT/STMN2/MAG/SCN1B/COBL/RASAL1/IFNG/CNR1/TRIM67/ATP1B2/FOXA1/AGT/ITPKA/NTRK3/GDF7/TTBK1/STAR/NTRK2/FEZ1/PTPRD/KIT/PLXNB1/SPINT1/IL1RAPL1/ROBO1/ALK/LPAR3/NEUROD2/DAB1/CAMK1D/ADRA2C/ROBO2/TRPV2/VWC2/RELN/GJC2/L1CAM/OLIG2/MIR221/TENM3/LTA/CNTF	45
GO:0006959	BP	GO:0006959	humoral immune response	37/1083	377/18866	0.00104675	0.0354812	0.0317307	CD5L/CPB2/PTPRC/IL7/VTN/IFNG/CD83/ZP4/COLEC11/CPN1/JCHAIN/SPINK5/CXCL9/REG3G/C1R/CXCL10/CXCL11/MUC7/C1QB/HLA-DQB1/C1S/PROS1/PDCD1/HLA-DRB1/HTN3/IGLV7-43/IGLC3/TRBC2/IGHM/IGHV3-15/IGHV3-33/ANG/C4B/LTA/IGKV3-20/C4A/IGKV2-29	37
GO:0002708	BP	GO:0002708	positive regulation of lymphocyte mediated immunity	15/1083	106/18866	0.00104945	0.0354812	0.0317307	PTPRC/LAG3/IL12RB1/CLNK/IL18RAP/AZGP1/SLAMF6/B2M/RASGRP1/CADM1/NCR3/HLA-F/KLRK1/LTA/HLA-B	15
GO:0032729	BP	GO:0032729	positive regulation of interferon-gamma production	11/1083	65/18866	0.00109028	0.0363828	0.032537	IL12RB2/IL12RB1/CD2/PTPN22/SLAMF6/RASGRP1/PDE4B/IL27/CD3E/KLRK1/LTA	11
GO:1902305	BP	GO:1902305	regulation of sodium ion transmembrane transport	11/1083	65/18866	0.00109028	0.0363828	0.032537	HECW1/TESC/SCN1B/FGF12/WNK4/ATP1B2/FXYD2/ATP1B1/GPD1L/FXYD7/FXYD1	11
GO:0036376	BP	GO:0036376	sodium ion export across plasma membrane	5/1083	15/18866	0.00114278	0.0374062	0.0334522	ATP1A3/ATP1B2/FXYD2/ATP1B1/FXYD1	5
GO:1904889	BP	GO:1904889	regulation of excitatory synapse assembly	5/1083	15/18866	0.00114278	0.0374062	0.0334522	LRRC4B/NTRK3/LRRTM2/PTPRD/VSTM5	5
GO:2000846	BP	GO:2000846	regulation of corticosteroid hormone secretion	5/1083	15/18866	0.00114278	0.0374062	0.0334522	TAC1/GAL/AGT/GHRL/GALR1	5
GO:0034329	BP	GO:0034329	cell junction assembly	41/1083	434/18866	0.00121631	0.0395609	0.0353792	NR1H4/CDH1/LIMS2/CAMSAP3/CDH7/PCDHB4/WNT11/SFRP1/NRXN2/PCDHB2/PCDHB6/PCDHB10/ACE2/CRB3/LRRC4B/ADGRB3/AGT/AMIGO2/NTRK3/LRRTM2/NTRK2/PTPRO/PTPRD/GHRL/CHRNB2/CLDN1/PLXNB1/IL1RAPL1/GJB1/CTNND2/JUP/LINGO2/PCDHB9/SLITRK4/CLDN7/ROBO2/SLITRK2/THBS2/SLIT1/VSTM5/PCDHB16	41
GO:0007157	BP	GO:0007157	heterophilic cell-cell adhesion via plasma membrane cell adhesion molecules	9/1083	47/18866	0.00123609	0.0399515	0.0357285	TENM1/CD209/CRB1/AMIGO2/NECTIN4/PTPRD/IL1RAPL1/CADM1/TENM3	9
GO:0042100	BP	GO:0042100	B cell proliferation	14/1083	97/18866	0.00125305	0.0402464	0.0359922	CD38/CD22/CD74/PTPRC/TNFSF13B/IL7/CD70/CHRNB2/FCRL3/IKZF3/CTLA4/CD300A/RASGRP1/CARD11	14
GO:0002791	BP	GO:0002791	regulation of peptide secretion	37/1083	381/18866	0.00126555	0.0403955	0.0361256	CD38/HFE/CD22/NR1H4/CD74/RAPGEF3/MYOM1/SFRP1/GCK/IFNG/ADTRP/CNR1/ITPR2/FOXA2/SYT11/GRP/HTR2B/SORL1/STXBP5L/EPHA5/PAM/GHRL/SYK/KCNS3/GPR27/PTGER4/TLR10/TLR1/CIDEA/CADM1/ADRA2C/C1QTNF12/FFAR3/HLA-DRB1/CLEC9A/ANG/CCL5	37
GO:0002833	BP	GO:0002833	positive regulation of response to biotic stimulus	27/1083	251/18866	0.00128306	0.0407014	0.0363991	ICAM3/PAK3/LAG3/CD209/COCH/CLNK/IL18RAP/ZBP1/NLRC5/GBP5/SLAMF6/PYHIN1/IFI16/AIM2/SYK/CLEC4D/MUC7/RASGRP1/CADM1/CARD11/PSMB8/NCR3/HLA-F/MUC12/KLRK1/PSMB9/CCL5	27
GO:0003002	BP	GO:0003002	regionalization	35/1083	355/18866	0.00130355	0.0410979	0.0367537	HOXA11/MEOX1/ALX4/GLI2/SEMA3C/HOXA9/WNT11/DLL3/FOXF1/SFRP1/COBL/HOXB6/FOXA2/DLL4/FOXA1/GATA4/BMPR1B/DNAAF1/PITX2/HHIP/PBX3/ROBO1/HOXD4/SOSTDC1/HOXC5/DMRT2/HES3/HOXD8/HOXC9/ROBO2/RELN/HOXC6/HOXC4/NTF4/HOXA10	35
GO:0051250	BP	GO:0051250	negative regulation of lymphocyte activation	19/1083	154/18866	0.0013418	0.0420459	0.0376015	HFE/CD74/RUNX3/GAL/LAG3/SFRP1/FGL1/CLNK/LAX1/IRF1/FGL2/IDO1/PTPN22/CTLA4/CD300A/TBC1D10C/CLEC4G/HLA-DRB1/HLA-F	19
GO:0002028	BP	GO:0002028	regulation of sodium ion transport	13/1083	88/18866	0.00148631	0.0462919	0.0413987	HECW1/PRSS8/TESC/SCN1B/FGF12/WNK4/ATP1B2/FXYD2/ATP1B1/GPD1L/ADRB2/FXYD7/FXYD1	13
GO:1903708	BP	GO:1903708	positive regulation of hemopoiesis	23/1083	204/18866	0.00153592	0.0475487	0.0425226	SCIN/CD74/RUNX3/GLI2/PTPRC/TESC/IL12RB1/IL7/IFNG/CD83/ZAP70/STAT1/PCK1/CD27/IL20/IL15/DCSTAMP/SYK/RHOH/RASGRP1/EGR3/HLA-DRB1/MIR221	23
GO:0050858	BP	GO:0050858	negative regulation of antigen receptor-mediated signaling pathway	7/1083	31/18866	0.00157076	0.0481731	0.043081	CD22/SLA2/GBP1/PTPN22/UBASH3A/FCRL3/CD300A	7
GO:0035930	BP	GO:0035930	corticosteroid hormone secretion	5/1083	16/18866	0.00158421	0.0481731	0.043081	TAC1/GAL/AGT/GHRL/GALR1	5
GO:1900451	BP	GO:1900451	positive regulation of glutamate receptor signaling pathway	5/1083	16/18866	0.00158421	0.0481731	0.043081	CACNG4/NECAB2/IFNG/ADRB2/RELN	5
GO:0034612	BP	GO:0034612	response to tumor necrosis factor	32/1083	320/18866	0.00163717	0.0494907	0.0442593	NR1H4/BIRC3/FAS/TNFSF13B/SFRP1/CLIP3/CCL24/KRT18/HYAL1/STAT1/GBP3/GBP1/PCK1/CD70/POSTN/CASP1/CD27/TNFRSF11A/GBP2/CLDN1/AIM2/DCSTAMP/SYK/KRT8/HAS2/PSMB8/UBD/LTA/LTB/PSMB9/CCL5/CCL4	32
GO:0009897	CC	GO:0009897	external side of plasma membrane	58/1128	417/19559	4.20663e-10	2.0318e-07	1.73579e-07	HFE/CD22/CD74/FAS/LY75/PTPRC/IL12RB2/LAG3/CD209/IL12RB1/ULBP1/CD83/CD2/FASLG/IL13RA2/ATP1B2/KLRD1/STAB2/CXCL9/CD27/TNFRSF11A/ACKR2/EPHA5/GFRA3/NCAM1/GFRA1/CD8A/KIT/CD3G/CHRNB2/CCR5/AZGP1/CTLA4/TMC1/BTNL9/B2M/CD3D/CA4/SCARA5/GFRA2/CXCL10/CXCR6/ADGRE1/FCRL6/RTN4RL1/CXCR3/PDCD1/HLA-DRB1/CD3E/FCGR3A/LY6G5C/HLA-F/IGLC3/TRBC2/IGHM/IGHV3-15/IGHV3-33/KLRK1	58
GO:0042101	CC	GO:0042101	T cell receptor complex	27/1128	140/19559	2.65563e-08	6.41335e-06	5.47899e-06	ZAP70/CD8A/CD3G/SYK/CD3D/CD8B/CD247/CD3E/TRBV4-1/TRBV9/TRBV6-6/TRBV5-6/TRBV27/TRBV28/TRBC2/TRAV3/TRAV4/TRAV8-2/TRAV8-3/TRAV12-2/TRAV14DV4/TRAV19/TRAV23DV6/TRAV39/TRBV3-1/TRAV1-2/TRAC	27
GO:0042611	CC	GO:0042611	MHC protein complex	11/1128	25/19559	4.713e-08	7.58793e-06	6.48244e-06	CD74/B2M/HLA-DQB1/HLA-DRB1/HLA-DRB5/HLA-DOA/HLA-DRA/HLA-C/HLA-F/HLA-B/HLA-DOB	11
GO:0098802	CC	GO:0098802	plasma membrane signaling receptor complex	42/1128	307/19559	1.73631e-07	2.09659e-05	1.79114e-05	HFE/CACNG5/CACNG4/IL12RB1/ITGB8/ZAP70/ITGA4/IL18RAP/BMPR1B/HTR3B/CD8A/CD3G/CHRNB2/SYK/B2M/CD3D/CD8B/TLR1/GPR156/GRIN2A/VWC2/CD247/CD3E/TRBV4-1/TRBV9/TRBV6-6/TRBV5-6/TRBV27/TRBV28/TRBC2/TRAV3/TRAV4/TRAV8-2/TRAV8-3/TRAV12-2/TRAV14DV4/TRAV19/TRAV23DV6/TRAV39/TRBV3-1/TRAV1-2/TRAC	42
GO:0099055	CC	GO:0099055	integral component of postsynaptic membrane	20/1128	117/19559	1.12894e-05	0.00109056	0.000931673	ADAM22/CACNG5/CACNG4/EFNB3/PLPPR4/LRRC4B/CHRM3/NTRK3/SLC6A3/LRRTM2/PTPRO/SLC6A1/CHRNB2/ADCY1/KCNA3/GRID1/GRIN2A/ADRA2C/SLITRK2/GABRD	20
GO:0042613	CC	GO:0042613	MHC class II protein complex	7/1128	16/19559	1.50322e-05	0.00121009	0.00103379	CD74/HLA-DQB1/HLA-DRB1/HLA-DRB5/HLA-DOA/HLA-DRA/HLA-DOB	7
GO:0098936	CC	GO:0098936	intrinsic component of postsynaptic membrane	20/1128	122/19559	2.13582e-05	0.00136133	0.001163	ADAM22/CACNG5/CACNG4/EFNB3/PLPPR4/LRRC4B/CHRM3/NTRK3/SLC6A3/LRRTM2/PTPRO/SLC6A1/CHRNB2/ADCY1/KCNA3/GRID1/GRIN2A/ADRA2C/SLITRK2/GABRD	20
GO:0099061	CC	GO:0099061	integral component of postsynaptic density membrane	12/1128	51/19559	2.49383e-05	0.00136133	0.001163	ADAM22/CACNG4/EFNB3/PLPPR4/LRRC4B/CHRM3/LRRTM2/PTPRO/ADCY1/GRID1/GRIN2A/ADRA2C	12
GO:0099699	CC	GO:0099699	integral component of synaptic membrane	23/1128	154/19559	2.53664e-05	0.00136133	0.001163	ADAM22/CACNG5/CACNG4/EFNB3/PLPPR4/CNR1/LRRC4B/SYT11/CHRM3/NTRK3/SLC6A3/LRRTM2/PTPRO/SLC6A1/CHRNB2/ADCY1/PRRT2/KCNA3/GRID1/GRIN2A/ADRA2C/SLITRK2/GABRD	23
GO:0062023	CC	GO:0062023	collagen-containing extracellular matrix	46/1128	427/19559	3.43237e-05	0.00165783	0.0014163	SEMA3B/LTBP1/COL11A1/ADAM11/COL5A3/IMPG2/COL19A1/COL9A3/TIMP3/CHADL/COCH/COL20A1/SFRP1/IL7/FGL1/VTN/COL12A1/IMPG1/MATN4/FGL2/ANGPTL3/POSTN/ADAMDEC1/AGT/COL2A1/ECM1/TMEFF2/NCAM1/ZP1/LAD1/AZGP1/HTRA1/SDC2/SERPINB9/ANGPTL7/C1QB/PODN/GPC5/EMILIN3/THBS2/VWC2/S100A4/L1CAM/COL6A6/ANG/RBP3	46
GO:0099146	CC	GO:0099146	intrinsic component of postsynaptic density membrane	12/1128	54/19559	4.59068e-05	0.0019386	0.00165617	ADAM22/CACNG4/EFNB3/PLPPR4/LRRC4B/CHRM3/LRRTM2/PTPRO/ADCY1/GRID1/GRIN2A/ADRA2C	12
GO:0031225	CC	GO:0031225	anchored component of membrane	24/1128	171/19559	4.8164e-05	0.0019386	0.00165617	MMP25/DPEP1/ULBP1/VNN2/CD2/CD48/NRN1/ART1/NT5E/CPO/GFRA3/NCAM1/GFRA1/ART3/LYPD5/LY6K/NOD2/CA4/GFRA2/CD52/TNFRSF10C/GPC5/GAS1/RTN4RL1	24
GO:0099240	CC	GO:0099240	intrinsic component of synaptic membrane	23/1128	166/19559	8.39544e-05	0.00287961	0.00246008	ADAM22/CACNG5/CACNG4/EFNB3/PLPPR4/CNR1/LRRC4B/SYT11/CHRM3/NTRK3/SLC6A3/LRRTM2/PTPRO/SLC6A1/CHRNB2/ADCY1/PRRT2/KCNA3/GRID1/GRIN2A/ADRA2C/SLITRK2/GABRD	23
GO:0098857	CC	GO:0098857	membrane microdomain	37/1128	330/19559	8.59247e-05	0.00287961	0.00246008	ABCB4/BIRC3/FAS/CDH1/SYNJ2/PTPRC/CLIP3/MAG/ADTRP/UNC5A/ZAP70/CD2/CD48/FASLG/CNR1/ACE2/DYSF/EDNRB/SLC6A3/ATP1B1/MALL/MAL2/CD8A/CHRNB2/LY6K/ADCY1/CAVIN4/CAVIN3/HAS2/HPSE/TLR1/KCNA3/LCK/RTN4RL1/LRRK2/CARD11/FXYD1	37
GO:0098589	CC	GO:0098589	membrane region	38/1128	343/19559	8.94287e-05	0.00287961	0.00246008	ABCB4/BIRC3/FAS/CDH1/SYNJ2/PTPRC/CLIP3/MAG/ADTRP/UNC5A/ZAP70/CD2/CD48/FASLG/CNR1/TEKT3/ACE2/DYSF/EDNRB/SLC6A3/ATP1B1/MALL/MAL2/CD8A/CHRNB2/LY6K/ADCY1/CAVIN4/CAVIN3/HAS2/HPSE/TLR1/KCNA3/LCK/RTN4RL1/LRRK2/CARD11/FXYD1	38
GO:0071556	CC	GO:0071556	integral component of lumenal side of endoplasmic reticulum membrane	8/1128	29/19559	0.0001725	0.00450758	0.00385087	CD74/HLA-DQB1/HLA-DRB1/HLA-DRB5/HLA-DRA/HLA-C/HLA-F/HLA-B	8
GO:0098553	CC	GO:0098553	lumenal side of endoplasmic reticulum membrane	8/1128	29/19559	0.0001725	0.00450758	0.00385087	CD74/HLA-DQB1/HLA-DRB1/HLA-DRB5/HLA-DRA/HLA-C/HLA-F/HLA-B	8
GO:0045121	CC	GO:0045121	membrane raft	36/1128	329/19559	0.00017344	0.00450758	0.00385087	ABCB4/BIRC3/FAS/CDH1/SYNJ2/PTPRC/CLIP3/MAG/ADTRP/UNC5A/ZAP70/CD2/CD48/FASLG/CNR1/ACE2/EDNRB/SLC6A3/ATP1B1/MALL/MAL2/CD8A/CHRNB2/LY6K/ADCY1/CAVIN4/CAVIN3/HAS2/HPSE/TLR1/KCNA3/LCK/RTN4RL1/LRRK2/CARD11/FXYD1	36
GO:0045211	CC	GO:0045211	postsynaptic membrane	32/1128	280/19559	0.000177317	0.00450758	0.00385087	ADAM22/ANK1/CACNG5/CACNG4/RPH3A/GABRP/GABRE/EFNB3/PLPPR4/LRRC4B/CHRM3/NTRK3/SLC6A3/LRRTM2/GABRR1/HTR3B/PTPRO/SLC6A1/CHRNB2/GABRB1/ADCY1/PRRT2/NSG1/IL1RAPL1/KCNA3/GRID1/GRIN2A/KCTD8/ADRA2C/SHC4/SLITRK2/GABRD	32
GO:0009898	CC	GO:0009898	cytoplasmic side of plasma membrane	22/1128	164/19559	0.000191078	0.00461453	0.00394224	ANK1/CDH1/PTPRC/RGS1/GNB3/GNAT1/ZAP70/CD2/GNG13/GNAZ/PTPN22/GNAL/PTPN7/KIT/CHMP4C/GEM/SYK/GNGT2/JUP/TNK1/CACNB4/LCK	22
GO:0098562	CC	GO:0098562	cytoplasmic side of membrane	24/1128	188/19559	0.000215738	0.00496197	0.00423906	ANK1/CDH1/PTPRC/RGS1/RASAL3/GNB3/GNAT1/ZAP70/CD2/GNG13/GNAZ/PTPN22/GNAL/PTPN7/KIT/CHMP4C/GEM/SYK/GNGT2/JUP/TNK1/CACNB4/LCK/LRRK2	24
GO:0099060	CC	GO:0099060	integral component of postsynaptic specialization membrane	13/1128	74/19559	0.000284826	0.00625324	0.0053422	ADAM22/CACNG4/EFNB3/PLPPR4/LRRC4B/CHRM3/LRRTM2/PTPRO/CHRNB2/ADCY1/GRID1/GRIN2A/ADRA2C	13
GO:0098862	CC	GO:0098862	cluster of actin-based cell projections	21/1128	159/19559	0.000328234	0.00669516	0.00571974	SCIN/MYO3A/PVALB/TRPA1/MYH14/CDH23/DOCK4/ACE2/IDO1/KCNK1/SLC3A1/DCDC2/SLC28A1/PTH1R/TMC1/CA4/MYO7B/CALB2/DAB1/TSPEAR/EPS8L2	21
GO:0072562	CC	GO:0072562	blood microparticle	20/1128	148/19559	0.000332679	0.00669516	0.00571974	PON1/CP/CD5L/APOL1/VTN/BCHE/JCHAIN/AGT/TMPRSS13/C1R/ALB/C1QB/C1S/PROS1/IGLC3/IGHM/HBE1/C4B/IGKV3-20/C4A	20
GO:0005890	CC	GO:0005890	sodium:potassium-exchanging ATPase complex	5/1128	12/19559	0.000356011	0.00686603	0.00586571	ATP1A3/ATP1B2/FXYD2/ATP1B1/FXYD1	5
GO:0090533	CC	GO:0090533	cation-transporting ATPase complex	6/1128	18/19559	0.0003696	0.00686603	0.00586571	ATP1A3/ATP1B2/FXYD2/ATP1B1/PLN/FXYD1	6
GO:0098948	CC	GO:0098948	intrinsic component of postsynaptic specialization membrane	13/1128	77/19559	0.000426108	0.00762259	0.00651206	ADAM22/CACNG4/EFNB3/PLPPR4/LRRC4B/CHRM3/LRRTM2/PTPRO/CHRNB2/ADCY1/GRID1/GRIN2A/ADRA2C	13
GO:0032421	CC	GO:0032421	stereocilium bundle	11/1128	59/19559	0.000485829	0.00838054	0.00715958	MYO3A/PVALB/TRPA1/CDH23/DOCK4/IDO1/DCDC2/TMC1/CALB2/TSPEAR/EPS8L2	11
GO:0098839	CC	GO:0098839	postsynaptic density membrane	14/1128	92/19559	0.00077138	0.0128475	0.0109757	ADAM22/CACNG5/CACNG4/EFNB3/PLPPR4/LRRC4B/CHRM3/LRRTM2/PTPRO/ADCY1/PRRT2/GRID1/GRIN2A/ADRA2C	14
GO:0098576	CC	GO:0098576	lumenal side of membrane	8/1128	36/19559	0.000848856	0.0136666	0.0116755	CD74/HLA-DQB1/HLA-DRB1/HLA-DRB5/HLA-DRA/HLA-C/HLA-F/HLA-B	8
GO:0098978	CC	GO:0098978	glutamatergic synapse	36/1128	361/19559	0.000996376	0.0155242	0.0132625	ADAM22/CDH1/CACNG5/CACNG4/CTTNBP2/PAK3/EFNB3/DLGAP3/PLPPR4/CNR1/LRRC4B/PPP1R1B/CHRM3/NTRK3/CPLX2/PSD2/LRRTM2/GABRR1/PTPRO/CAMK4/PTPRD/TNIK/GHRL/ADCY1/PRRT2/NSG1/IL1RAPL1/NPTX1/KCNA3/SLITRK4/GRID1/GRIN2A/ADRA2C/SLITRK2/GABRD/LRRK2	36
GO:0016328	CC	GO:0016328	lateral plasma membrane	11/1128	65/19559	0.00113306	0.0171021	0.0146105	CDH1/EPCAM/ATP1B2/ATP1B1/PTPRO/CLDN1/MTCL1/NSG1/GJB1/JUP/CLDN7	11
GO:0030665	CC	GO:0030665	clathrin-coated vesicle membrane	16/1128	118/19559	0.00121687	0.0178105	0.0152157	CD74/AREG/CD207/VAMP8/GAD1/SYT11/FCGR1A/CD3G/CD3D/ADRB2/ENTHD1/HLA-DQB1/HLA-DRB1/FCGR1B/HLA-DRB5/HLA-DRA	16
GO:0030669	CC	GO:0030669	clathrin-coated endocytic vesicle membrane	8/1128	40/19559	0.00175829	0.024978	0.021339	CD74/CD207/FCGR1A/HLA-DQB1/HLA-DRB1/FCGR1B/HLA-DRB5/HLA-DRA	8
GO:0150034	CC	GO:0150034	distal axon	31/1128	309/19559	0.00196501	0.0266979	0.0228083	PTPRN/RASGRF1/NGFR/KCNK2/STMN2/MYH14/COBL/SLC1A1/ITGA4/CNR1/GAD1/SYT11/IGHMBP2/CHRM3/CPLX2/NTRK2/FEZ1/PTPRO/PRKCB/CPLX4/PRRT2/ATCAY/KIF5C/CALB2/KCNA3/ADRA2C/TRPV2/LRRK2/L1CAM/ANG/TUBB3	31
GO:0098533	CC	GO:0098533	ATPase dependent transmembrane transport complex	6/1128	24/19559	0.00198991	0.0266979	0.0228083	ATP1A3/ATP1B2/FXYD2/ATP1B1/PLN/FXYD1	6
GO:0030662	CC	GO:0030662	coated vesicle membrane	21/1128	183/19559	0.00205206	0.0267877	0.022885	CD74/AREG/CD207/VAMP8/GAD1/SYT11/FCGR1A/CD3G/B2M/CD3D/ADRB2/ENTHD1/HLA-DQB1/DIPK2A/HLA-DRB1/FCGR1B/HLA-DRB5/HLA-DRA/HLA-C/HLA-F/HLA-B	21
GO:0061702	CC	GO:0061702	inflammasome complex	5/1128	17/19559	0.00218385	0.0277578	0.0237138	CASP1/CASP5/AIM2/NLRP6/NLRP9	5
GO:0012507	CC	GO:0012507	ER to Golgi transport vesicle membrane	10/1128	62/19559	0.00271676	0.0336461	0.0287442	CD74/AREG/B2M/HLA-DQB1/HLA-DRB1/HLA-DRB5/HLA-DRA/HLA-C/HLA-F/HLA-B	10
GO:0099634	CC	GO:0099634	postsynaptic specialization membrane	15/1128	118/19559	0.0032336	0.0385931	0.0329705	ADAM22/CACNG5/CACNG4/EFNB3/PLPPR4/LRRC4B/CHRM3/LRRTM2/PTPRO/CHRNB2/ADCY1/PRRT2/GRID1/GRIN2A/ADRA2C	15
GO:0097060	CC	GO:0097060	synaptic membrane	36/1128	387/19559	0.00327602	0.0385931	0.0329705	ADAM22/ANK1/CACNG5/CACNG4/RPH3A/GABRP/GABRE/EFNB3/PLPPR4/CNR1/LRRC4B/SYT11/CHRM3/KCNK1/NTRK3/SLC6A3/LRRTM2/GABRR1/HTR3B/PTPRO/SLC6A1/CHRNB2/GABRB1/ADCY1/PRRT2/NSG1/IL1RAPL1/CALB2/KCNA3/GRID1/GRIN2A/KCTD8/ADRA2C/SHC4/SLITRK2/GABRD	36
GO:0005788	CC	GO:0005788	endoplasmic reticulum lumen	30/1128	308/19559	0.00356835	0.0409148	0.0349539	CP/LTBP1/COL11A1/COL5A3/COL19A1/CHGB/COL9A3/SERPIND1/APOL1/COL20A1/VTN/COL12A1/BCHE/SPP1/VGF/COL2A1/SLC27A2/GHRL/ARSL/MXRA8/ALB/B2M/COL22A1/SDC2/CES3/AMBN/IL27/F5/ARSH/C4A	30
GO:1902495	CC	GO:1902495	transmembrane transporter complex	31/1128	322/19559	0.00367776	0.0409148	0.0349539	CACNG5/CACNG4/KCNK2/GABRP/HCN2/GABRE/ATP1A3/SCN1B/ATP1B2/KCNK1/FXYD2/TRPC3/ATP1B1/GABRR1/HTR3B/CLIC2/KCNS2/KCNJ6/CHRNB2/LRRC52/GABRB1/KCNV2/KCNS3/KCNA3/CACNB4/GRIN2A/PDE4B/GABRD/VWC2/PLN/FXYD1	31
GO:1902711	CC	GO:1902711	GABA-A receptor complex	5/1128	19/19559	0.00372723	0.0409148	0.0349539	GABRP/GABRE/GABRR1/GABRB1/GABRD	5
GO:0005581	CC	GO:0005581	collagen trimer	12/1128	87/19559	0.00413419	0.0443737	0.0379089	COL11A1/COL5A3/COL19A1/COL9A3/COL20A1/COL12A1/LOX/COLEC11/COL2A1/COL22A1/C1QB/COL6A6	12
GO:1902710	CC	GO:1902710	GABA receptor complex	5/1128	20/19559	0.00473676	0.049736	0.04249	GABRP/GABRE/GABRR1/GABRB1/GABRD	5
GO:0140375	MF	GO:0140375	immune receptor activity	24/1069	135/18352	8.84722e-07	0.000781209	0.000705915	CD74/IL12RB2/IL12RB1/IL21R/IL1R2/IL18RAP/IL13RA2/GPR17/ACKR2/GFRA3/GFRA1/CCR5/IL17RE/GFRA2/CXCR6/HLA-DQB1/CXCR3/IL17REL/HLA-DRB1/FCGR1B/HLA-DOA/HLA-DRA/KLRK1/HLA-DOB	24
GO:0042605	MF	GO:0042605	peptide antigen binding	10/1069	31/18352	6.20972e-06	0.00274159	0.00247735	CD209/TAP1/HLA-DQB1/HLA-DRB1/HLA-DRB5/HLA-DRA/HLA-C/HLA-F/TRAV19/HLA-B	10
GO:0005539	MF	GO:0005539	glycosaminoglycan binding	30/1069	232/18352	3.49088e-05	0.00902717	0.00815711	TENM1/COL11A1/CCN5/COL5A3/IMPG2/PTPRC/SERPIND1/SFRP1/VTN/IMPG1/JCHAIN/ANGPTL3/LGR6/POSTN/STAB2/MSTN/REG3G/RSPO3/PCOLCE2/LIPH/NOD2/CXCL10/CXCL11/RTN4RL1/THBS2/SLIT1/SULF2/IGHM/ANG/TGFBR3L	30
GO:0004896	MF	GO:0004896	cytokine receptor activity	17/1069	97/18352	4.08932e-05	0.00902717	0.00815711	CD74/IL12RB2/IL12RB1/IL21R/IL1R2/IL18RAP/IL13RA2/GPR17/ACKR2/GFRA3/GFRA1/CCR5/IL17RE/GFRA2/CXCR6/CXCR3/IL17REL	17
GO:0023023	MF	GO:0023023	MHC protein complex binding	8/1069	25/18352	5.72926e-05	0.0101179	0.0091427	CD74/KLRD1/ATP1B1/CD8A/HLA-DRB1/HLA-DOA/HLA-DRA/HLA-DOB	8
GO:0042287	MF	GO:0042287	MHC protein binding	10/1069	42/18352	0.000114686	0.0128383	0.011601	CD74/LAG3/KLRD1/COL2A1/CD8A/TAP1/CD8B/FCRL6/TRAV19/KLRK1	10
GO:0003823	MF	GO:0003823	antigen binding	23/1069	168/18352	0.000116584	0.0128383	0.011601	LAG3/CD209/ITGA4/SLAMF1/CD48/JCHAIN/KLRD1/TAP1/HLA-DQB1/HLA-DRB1/HLA-DRB5/HLA-DRA/HLA-C/HLA-F/IGLV7-43/IGLC3/TRBC2/TRAV19/IGHM/IGHV3-15/IGHV3-33/HLA-B/IGKV3-20	23
GO:0008201	MF	GO:0008201	heparin binding	23/1069	169/18352	0.000127669	0.0128383	0.011601	TENM1/COL11A1/CCN5/COL5A3/IMPG2/PTPRC/SERPIND1/SFRP1/VTN/IMPG1/ANGPTL3/LGR6/POSTN/MSTN/RSPO3/PCOLCE2/LIPH/CXCL10/CXCL11/RTN4RL1/THBS2/SLIT1/ANG	23
GO:0032395	MF	GO:0032395	MHC class II receptor activity	5/1069	10/18352	0.000130855	0.0128383	0.011601	HLA-DQB1/HLA-DRB1/HLA-DOA/HLA-DRA/HLA-DOB	5
GO:0023026	MF	GO:0023026	MHC class II protein complex binding	6/1069	16/18352	0.000185953	0.0164197	0.0148371	CD74/ATP1B1/HLA-DRB1/HLA-DOA/HLA-DRA/HLA-DOB	6
GO:0016918	MF	GO:0016918	retinal binding	6/1069	17/18352	0.000273265	0.0219357	0.0198215	RBP2/OPN4/RBP7/CRABP1/CYP27C1/RBP3	6
GO:0005044	MF	GO:0005044	scavenger receptor activity	10/1069	47/18352	0.000309611	0.0227822	0.0205864	CD5L/VTN/STAB2/ENPP2/TMPRSS13/ACKR2/MEGF10/TMPRSS3/SCARA5/TMPRSS2	10
GO:1901681	MF	GO:1901681	sulfur compound binding	29/1069	262/18352	0.000688417	0.0467594	0.0422526	TKTL1/TENM1/COL11A1/CCN5/COL5A3/IMPG2/PTPRC/SERPIND1/PNPLA3/SFRP1/VTN/IMPG1/ANGPTL3/LGR6/POSTN/MSTN/RSPO3/ACOT11/PCOLCE2/LIPH/CXCL10/CXCL11/ACOT12/HPSE2/RTN4RL1/THBS2/SLIT1/ANG/HS3ST5	29

## Sheet: KEGG
	ID	Description	GeneRatio	BgRatio	pvalue	p.adjust	qvalue	geneID	Count
hsa04940	hsa04940	Type I diabetes mellitus	17/499	43/8096	1.92735e-10	5.66641e-08	4.76765e-08	FAS/PTPRN/GZMB/IFNG/FASLG/GAD1/HLA-DQB1/PRF1/HLA-DRB1/HLA-DRB5/HLA-DOA/HLA-DRA/HLA-C/HLA-F/LTA/HLA-B/HLA-DOB	17
hsa04514	hsa04514	Cell adhesion molecules	31/499	149/8096	1.31018e-09	1.92597e-07	1.62049e-07	CD22/CDH1/ICAM3/PTPRC/MAG/ITGB8/NRXN2/ITGA4/CD2/LRRC4B/NCAM1/CD8A/NCAM2/MPZ/CLDN1/CTLA4/SDC2/CD8B/HLA-DQB1/CLDN7/CADM1/PDCD1/HLA-DRB1/HLA-DRB5/L1CAM/HLA-DOA/HLA-DRA/HLA-C/HLA-F/HLA-B/HLA-DOB	31
hsa05332	hsa05332	Graft-versus-host disease	15/499	42/8096	1.1983e-08	1.17433e-06	9.88071e-07	FAS/GZMB/IFNG/FASLG/KLRD1/HLA-DQB1/PRF1/HLA-DRB1/HLA-DRB5/HLA-DOA/HLA-DRA/HLA-C/HLA-F/HLA-B/HLA-DOB	15
hsa05330	hsa05330	Allograft rejection	14/499	38/8096	2.33548e-08	1.71658e-06	1.44431e-06	FAS/GZMB/IFNG/FASLG/HLA-DQB1/PRF1/HLA-DRB1/HLA-DRB5/HLA-DOA/HLA-DRA/HLA-C/HLA-F/HLA-B/HLA-DOB	14
hsa05320	hsa05320	Autoimmune thyroid disease	15/499	53/8096	4.03195e-07	2.37079e-05	1.99476e-05	FAS/TG/GZMB/FASLG/CTLA4/HLA-DQB1/PRF1/HLA-DRB1/HLA-DRB5/HLA-DOA/HLA-DRA/HLA-C/HLA-F/HLA-B/HLA-DOB	15
hsa04658	hsa04658	Th1 and Th2 cell differentiation	20/499	92/8096	5.56221e-07	2.72548e-05	2.29319e-05	RUNX3/IL12RB2/DLL3/IL12RB1/IFNG/ZAP70/STAT1/RBPJL/DLL4/CD3G/CD3D/HLA-DQB1/LCK/HLA-DRB1/HLA-DRB5/CD247/CD3E/HLA-DOA/HLA-DRA/HLA-DOB	20
hsa04640	hsa04640	Hematopoietic cell lineage	20/499	99/8096	1.90449e-06	7.99886e-05	6.73015e-05	CD38/CD22/IL7/ITGA4/IL1R2/CD2/FCGR1A/CD8A/KIT/CD3G/CD3D/CD8B/CD7/HLA-DQB1/HLA-DRB1/HLA-DRB5/CD3E/HLA-DOA/HLA-DRA/HLA-DOB	20
hsa04060	hsa04060	Cytokine-cytokine receptor interaction	39/499	295/8096	4.21734e-06	0.000154987	0.000130405	IL32/FAS/NGFR/IL12RB2/IL12RB1/TNFSF13B/IL21R/IL7/CCL24/IFNG/IL1R2/IL18RAP/FASLG/IL13RA2/CD70/MSTN/BMPR1B/CXCL9/CD27/TNFRSF11A/GDF7/CTF1/CCR5/IL20/IL17RE/IL15/CXCL10/CXCL11/PRL/CXCR6/TNFRSF10D/TNFRSF10C/CXCR3/IL27/LTA/LTB/CNTF/CCL5/CCL4	39
hsa04974	hsa04974	Protein digestion and absorption	19/499	103/8096	1.38336e-05	0.000451899	0.000380223	COL11A1/COL5A3/CPB2/COL19A1/COL9A3/COL20A1/ATP1A3/SLC1A1/COL12A1/ATP1B2/ACE2/FXYD2/SLC3A1/COL2A1/ATP1B1/CPA2/COL22A1/COL6A6/PGA5	19
hsa04612	hsa04612	Antigen processing and presentation	16/499	78/8096	1.66115e-05	0.000488377	0.000410915	CD74/IFNG/KLRD1/CD8A/B2M/TAP1/CD8B/HLA-DQB1/HLA-DRB1/HLA-DRB5/HLA-DOA/HLA-DRA/HLA-C/HLA-F/HLA-B/HLA-DOB	16
hsa05321	hsa05321	Inflammatory bowel disease	14/499	65/8096	3.1422e-05	0.000839824	0.000706619	IL12RB2/IL12RB1/IL21R/IFNG/STAT1/IL18RAP/RORC/NOD2/HLA-DQB1/HLA-DRB1/HLA-DRB5/HLA-DOA/HLA-DRA/HLA-DOB	14
hsa04660	hsa04660	T cell receptor signaling pathway	18/499	104/8096	5.64453e-05	0.00138291	0.00116357	PAK3/PTPRC/GRAP2/IFNG/ITK/ZAP70/PIK3R3/CD8A/CD3G/CTLA4/CD3D/CD8B/RASGRP1/LCK/PDCD1/CARD11/CD247/CD3E	18
hsa05150	hsa05150	Staphylococcus aureus infection	17/499	96/8096	6.71043e-05	0.00151759	0.00127688	KRT18/KRT36/FCGR1A/C1R/KRT15/KRT9/C1QB/HLA-DQB1/C1S/HLA-DRB1/HLA-DRB5/FCGR3A/HLA-DOA/HLA-DRA/C4B/HLA-DOB/C4A	17
hsa05322	hsa05322	Systemic lupus erythematosus	21/499	136/8096	7.98949e-05	0.00167779	0.00141168	IFNG/FCGR1A/C1R/C1QB/HLA-DQB1/H2AC6/C1S/GRIN2A/H2BC13/HLA-DRB1/HLA-DRB5/FCGR3A/HLA-DOA/HLA-DRA/C4B/HLA-DOB/C4A/H3C6/H2AC12/H4C5/H3C10	21
hsa04659	hsa04659	Th17 cell differentiation	18/499	108/8096	9.40504e-05	0.00184339	0.00155101	IL12RB1/IL21R/IFNG/ZAP70/STAT1/RORC/CD3G/CD3D/HLA-DQB1/LCK/HLA-DRB1/IL27/HLA-DRB5/CD247/CD3E/HLA-DOA/HLA-DRA/HLA-DOB	18
hsa04650	hsa04650	Natural killer cell mediated cytotoxicity	20/499	131/8096	0.000138045	0.00253658	0.00213425	FAS/GZMB/IFNG/ULBP1/ZAP70/CD48/PIK3R3/FASLG/KLRD1/SYK/PRKCB/PRF1/LCK/SHC4/CD247/FCGR3A/NCR3/HLA-C/KLRK1/HLA-B	20
hsa05169	hsa05169	Epstein-Barr virus infection	26/499	202/8096	0.000265678	0.00459466	0.0038659	RUNX3/FAS/STAT1/PIK3R3/RBPJL/CCNA1/ENTPD1/CD3G/SAP30/SYK/B2M/CD3D/TAP1/CXCL10/HLA-DQB1/HLA-DRB1/HLA-DRB5/CD247/CD3E/HLA-DOA/HLA-DRA/HLA-C/HLA-F/IRF9/HLA-B/HLA-DOB	26
hsa04080	hsa04080	Neuroactive ligand-receptor interaction	37/499	341/8096	0.00050547	0.00825601	0.00694652	TAC1/GAL/P2RY10/GABRP/GABRE/CCKBR/KISS1R/CNR1/PYY/SSTR4/CHRM3/GRP/AGT/HTR2B/EDNRB/GZMA/GABRR1/NPFFR1/GHRL/CHRNB2/PTH1R/GABRB1/GALR1/ADRB2/LPAR3/PTGER4/PRL/CYSLTR1/GPR156/MC5R/HTR1A/GRM8/GRID1/GRIN2A/NPW/ADRA2C/GABRD	37
hsa05416	hsa05416	Viral myocarditis	11/499	60/8096	0.000948744	0.0146806	0.0123521	MYH7/HLA-DQB1/PRF1/HLA-DRB1/HLA-DRB5/HLA-DOA/HLA-DRA/HLA-C/HLA-F/HLA-B/HLA-DOB	11
hsa04727	hsa04727	GABAergic synapse	14/499	89/8096	0.00100541	0.0147795	0.0124353	SLC38A5/GABRP/GABRE/GNB3/GNG13/GAD1/GABRR1/SLC6A1/KCNJ6/GABRB1/ADCY1/PRKCB/GNGT2/GABRD	14
hsa05032	hsa05032	Morphine addiction	14/499	91/8096	0.00125654	0.0175916	0.0148014	GABRP/GABRE/GNB3/GNG13/GABRR1/PDE1C/KCNJ6/GABRB1/ADCY1/PRKCB/GNGT2/PDE3A/PDE4B/GABRD	14
hsa05340	hsa05340	Primary immunodeficiency	8/499	38/8096	0.00185984	0.0248542	0.0209121	PTPRC/ZAP70/CD8A/CD3D/TAP1/CD8B/LCK/CD3E	8
hsa04964	hsa04964	Proximal tubule bicarbonate reclamation	6/499	23/8096	0.00217916	0.0278554	0.0234372	ATP1A3/PCK1/ATP1B2/FXYD2/ATP1B1/CA4	6
hsa04145	hsa04145	Phagosome	19/499	152/8096	0.00243934	0.0288567	0.0242797	CD209/TUBB4A/COLEC11/FCGR1A/C1R/TAP1/TUBAL3/HLA-DQB1/THBS2/HLA-DRB1/HLA-DRB5/FCGR3A/HLA-DOA/HLA-DRA/HLA-C/HLA-F/HLA-B/HLA-DOB/TUBB3	19
hsa05140	hsa05140	Leishmaniasis	12/499	77/8096	0.0024538	0.0288567	0.0242797	IFNG/ITGA4/STAT1/FCGR1A/PRKCB/HLA-DQB1/HLA-DRB1/HLA-DRB5/FCGR3A/HLA-DOA/HLA-DRA/HLA-DOB	12
hsa04672	hsa04672	Intestinal immune network for IgA production	9/499	49/8096	0.00267977	0.0303021	0.0254958	TNFSF13B/ITGA4/IL15/HLA-DQB1/HLA-DRB1/HLA-DRB5/HLA-DOA/HLA-DRA/HLA-DOB	9
hsa04970	hsa04970	Salivary secretion	13/499	93/8096	0.00439208	0.0461169	0.0388023	CD38/ATP1A3/ITPR2/ATP1B2/CHRM3/FXYD2/ATP1B1/ADCY1/PRKCB/ADRB2/CST2/MUC7/HTN3	13
hsa05323	hsa05323	Rheumatoid arthritis	13/499	93/8096	0.00439208	0.0461169	0.0388023	TNFSF13B/IFNG/TNFRSF11A/CTLA4/IL15/HLA-DQB1/HLA-DRB1/HLA-DRB5/HLA-DOA/HLA-DRA/LTB/HLA-DOB/CCL5	13
hsa05235	hsa05235	PD-L1 expression and PD-1 checkpoint pathway in cancer	12/499	89/8096	0.00811949	0.0797062	0.0670639	IFNG/ZAP70/STAT1/PIK3R3/CD3G/CD3D/ALK/RASGRP1/LCK/PDCD1/CD247/CD3E	12
hsa04061	hsa04061	Viral protein interaction with cytokine and cytokine receptor	13/499	100/8096	0.00813328	0.0797062	0.0670639	CCL24/IL18RAP/CXCL9/CCR5/IL20/CXCL10/CXCL11/TNFRSF10D/TNFRSF10C/CXCR3/LTA/CCL5/CCL4	13
hsa05142	hsa05142	Chagas disease	13/499	102/8096	0.00956825	0.0907441	0.0763511	FAS/IFNG/PIK3R3/FASLG/GNAL/PPP2R2B/CD3G/ADCY1/CD3D/C1QB/CD247/CD3E/CCL5	13
hsa05033	hsa05033	Nicotine addiction	7/499	40/8096	0.0102261	0.0923908	0.0777366	GABRP/GABRE/GABRR1/CHRNB2/GABRB1/GRIN2A/GABRD	7
hsa05310	hsa05310	Asthma	6/499	31/8096	0.0104577	0.0923908	0.0777366	HLA-DQB1/HLA-DRB1/HLA-DRB5/HLA-DOA/HLA-DRA/HLA-DOB	6
hsa04261	hsa04261	Adrenergic signaling in cardiomyocytes	17/499	150/8096	0.0106847	0.0923908	0.0777366	CACNG5/CACNG4/RAPGEF3/MYH7/ATP1A3/SCN1B/ATP1B2/PPP1R1A/AGT/FXYD2/ATP1B1/PPP2R2B/MYL3/ADCY1/ADRB2/CACNB4/PLN	17
hsa04929	hsa04929	GnRH secretion	9/499	64/8096	0.0158827	0.131992	0.111057	KCNN2/HCN2/KISS1R/PIK3R3/SPP1/ITPR2/ESR2/KCNJ6/PRKCB	9
hsa04918	hsa04918	Thyroid hormone synthesis	10/499	75/8096	0.0161623	0.131992	0.111057	TG/ATP1A3/SLC5A5/ITPR2/ATP1B2/FXYD2/ATP1B1/ALB/ADCY1/PRKCB	10
hsa04260	hsa04260	Cardiac muscle contraction	11/499	87/8096	0.017381	0.138109	0.116203	CACNG5/CACNG4/MYH7/ATP1A3/ATP1B2/FXYD2/ATP1B1/COX6A2/MYL3/COX7A1/CACNB4	11
hsa02010	hsa02010	ABC transporters	7/499	45/8096	0.0191146	0.14573	0.122616	ABCB4/ABCC12/ABCA8/ABCA6/ABCA3/TAP1/ABCD2	7
hsa04621	hsa04621	NOD-like receptor signaling pathway	19/499	185/8096	0.0193316	0.14573	0.122616	BIRC3/STAT1/GBP3/GBP1/ITPR2/CASP1/CASP5/PSTPIP1/GBP5/GBP2/GBP4/IFI16/AIM2/NOD2/NLRP6/TRPV2/MAP1LC3C/IRF9/CCL5	19
hsa00601	hsa00601	Glycosphingolipid biosynthesis - lacto and neolacto series	5/499	27/8096	0.0227701	0.165892	0.13958	ST8SIA1/B3GALT2/FUT3/B3GNT3/FUT7	5
hsa04960	hsa04960	Aldosterone-regulated sodium reabsorption	6/499	37/8096	0.0241985	0.165892	0.13958	ATP1A3/PIK3R3/ATP1B2/FXYD2/ATP1B1/PRKCB	6
hsa05143	hsa05143	African trypanosomiasis	6/499	37/8096	0.0241985	0.165892	0.13958	FAS/APOL1/IFNG/FASLG/IDO1/PRKCB	6
hsa04726	hsa04726	Serotonergic synapse	13/499	115/8096	0.0242632	0.165892	0.13958	MAOB/RAPGEF3/KCNN2/GNB3/ITPR2/GNG13/HTR2B/HTR3B/KCNJ6/GABRB1/PRKCB/GNGT2/HTR1A	13
hsa04917	hsa04917	Prolactin signaling pathway	9/499	70/8096	0.0271393	0.178408	0.15011	ESR1/GCK/STAT1/PIK3R3/IRF1/ESR2/TNFRSF11A/PRL/SHC4	9
hsa05202	hsa05202	Transcriptional misregulation in cancer	19/499	192/8096	0.0273073	0.178408	0.15011	HOXA11/BIRC3/NGFR/HOXA9/RUNX1T1/GZMB/IL1R2/CCNA1/FCGR1A/TSPAN7/HPGD/SPINT1/PBX3/JUP/ETV4/TMPRSS2/HOXA10/H3C6/H3C10	19
hsa04728	hsa04728	Dopaminergic synapse	14/499	132/8096	0.0323336	0.206654	0.173877	MAOB/GNB3/ITPR2/GNG13/PPP1R1B/GNAL/SLC6A3/KIF5A/PPP2R2B/KCNJ6/PRKCB/GNGT2/KIF5C/GRIN2A	14
hsa05168	hsa05168	Herpes simplex virus 1 infection	41/499	498/8096	0.033485	0.20946	0.176237	CD74/BIRC3/FAS/IFNG/STAT1/PIK3R3/FASLG/ZNF549/ZNF233/ZNF208/ZNF382/SYK/B2M/ZNF610/TAP1/ZNF415/ZNF454/HLA-DQB1/ZFP82/ZNF676/HLA-DRB1/ZNF257/ZNF98/ZNF860/ZNF560/ZNF667/ZNF649/HLA-DRB5/HLA-DOA/HLA-DRA/HLA-C/HLA-F/IRF9/ZNF99/ZNF727/LTA/HLA-B/HLA-DOB/ZNF578/CCL5/ZNF229	41
hsa04610	hsa04610	Complement and coagulation cascades	10/499	85/8096	0.0354428	0.215317	0.181165	CPB2/SERPIND1/VTN/C1R/C1QB/C1S/PROS1/F5/C4B/C4A	10
hsa05164	hsa05164	Influenza A	17/499	172/8096	0.0358862	0.215317	0.181165	FAS/IFNG/STAT1/PIK3R3/FASLG/CASP1/PRKCB/CXCL10/HLA-DQB1/TMPRSS2/HLA-DRB1/HLA-DRB5/HLA-DOA/HLA-DRA/IRF9/HLA-DOB/CCL5	17
hsa04925	hsa04925	Aldosterone synthesis and secretion	11/499	98/8096	0.0381049	0.224057	0.188519	ATP1A3/ITPR2/ATP1B2/AGT/CYP11A1/ATP1B1/STAR/CAMK4/ADCY1/PRKCB/CAMK1D	11
hsa05034	hsa05034	Alcoholism	18/499	187/8096	0.0394032	0.227148	0.19112	MAOB/GNB3/SLC29A1/GNG13/PPP1R1B/SLC6A3/NTRK2/CAMK4/HDAC11/GNGT2/H2AC6/GRIN2A/H2BC13/SHC4/H3C6/H2AC12/H4C5/H3C10	18
hsa04961	hsa04961	Endocrine and other factor-regulated calcium reabsorption	7/499	53/8096	0.0427032	0.232403	0.195541	ESR1/ATP1A3/ATP1B2/FXYD2/ATP1B1/PTH1R/PRKCB	7
hsa03320	hsa03320	PPAR signaling pathway	9/499	76/8096	0.0431017	0.232403	0.195541	ME1/ACSBG1/EHHADH/FABP3/PCK1/SLC27A2/ACSL6/PLIN4/ACOX2	9
hsa04971	hsa04971	Gastric acid secretion	9/499	76/8096	0.0431017	0.232403	0.195541	KCNK2/ATP1A3/CCKBR/ITPR2/ATP1B2/CHRM3/ATP1B1/ADCY1/PRKCB	9
hsa04512	hsa04512	ECM-receptor interaction	10/499	88/8096	0.0434768	0.232403	0.195541	COL9A3/ITGB8/VTN/ITGA4/SPP1/SV2C/COL2A1/THBS2/RELN/COL6A6	10
hsa04972	hsa04972	Pancreatic secretion	11/499	102/8096	0.0487449	0.247099	0.207906	CD38/CPB2/ATP1A3/ITPR2/ATP1B2/CHRM3/FXYD2/ATP1B1/CPA2/ADCY1/PRKCB	11
hsa04062	hsa04062	Chemokine signaling pathway	18/499	192/8096	0.0489469	0.247099	0.207906	CCL24/GNB3/ITK/STAT1/PIK3R3/GNG13/CXCL9/CCR5/ADCY1/PRKCB/GNGT2/CXCL10/CXCL11/CXCR6/SHC4/CXCR3/CCL5/CCL4	18
hsa04024	hsa04024	cAMP signaling pathway	20/499	219/8096	0.0495878	0.247099	0.207906	RAPGEF3/HCN2/ATP1A3/PIK3R3/SOX9/ATP1B2/PPP1R1B/FXYD2/ATP1B1/CAMK4/GHRL/HHIP/ADCY1/ADRB2/PDE3A/HTR1A/GRIN2A/PDE4B/PLN/FXYD1	20
hsa05166	hsa05166	Human T-cell leukemia virus 1 infection	20/499	219/8096	0.0495878	0.247099	0.207906	IL1R2/PIK3R3/CCNA1/CD3G/IL15/ADCY1/B2M/CD3D/HLA-DQB1/LCK/HLA-DRB1/HLA-DRB5/CD3E/HLA-DOA/HLA-DRA/HLA-C/HLA-F/LTA/HLA-B/HLA-DOB	20
hsa04720	hsa04720	Long-term potentiation	8/499	67/8096	0.0525463	0.257477	0.216638	RPS6KA2/RAPGEF3/ITPR2/PPP1R1A/CAMK4/ADCY1/PRKCB/GRIN2A	8
hsa04064	hsa04064	NF-kappa B signaling pathway	11/499	104/8096	0.0547544	0.263898	0.222041	BIRC3/TNFSF13B/ZAP70/TNFRSF11A/SYK/PRKCB/LCK/CARD11/LTA/LTB/CCL4	11
hsa00534	hsa00534	Glycosaminoglycan biosynthesis - heparan sulfate / heparin	4/499	24/8096	0.0567886	0.26516	0.223103	HS3ST3B1/HS3ST3A1/EXTL1/HS3ST5	4
hsa00230	hsa00230	Purine metabolism	13/499	130/8096	0.05682	0.26516	0.223103	ENPP4/RRM2B/GUCY2C/PDE6A/NT5E/ENTPD1/PKLR/AK5/PDE1C/AK4/ADCY1/PDE3A/PDE4B	13
hsa05170	hsa05170	Human immunodeficiency virus 1 infection	19/499	212/8096	0.0636124	0.292219	0.24587	FAS/PAK3/GNB3/PIK3R3/FASLG/ITPR2/GNG13/CD3G/CCR5/PRKCB/B2M/GNGT2/CD3D/TAP1/CD247/CD3E/HLA-C/HLA-F/HLA-B	19
hsa00620	hsa00620	Pyruvate metabolism	6/499	47/8096	0.0670143	0.298518	0.25117	ME1/PCK1/PKLR/LDHC/LDHAL6A/ACOT12	6
hsa04973	hsa04973	Carbohydrate digestion and absorption	6/499	47/8096	0.0670143	0.298518	0.25117	ATP1A3/PIK3R3/ATP1B2/FXYD2/ATP1B1/PRKCB	6
hsa04919	hsa04919	Thyroid hormone signaling pathway	12/499	121/8096	0.0688738	0.302222	0.254287	ESR1/MYH7/ATP1A3/STAT1/PIK3R3/ATP1B2/GATA4/FXYD2/ATP1B1/PRKCB/PLCD1/PLN	12
hsa05414	hsa05414	Dilated cardiomyopathy	10/499	96/8096	0.0706847	0.305607	0.257135	CACNG5/CACNG4/MYH7/ITGB8/ITGA4/AGT/MYL3/ADCY1/CACNB4/PLN	10
hsa04911	hsa04911	Insulin secretion	9/499	86/8096	0.0817602	0.347513	0.292394	KCNN2/ATP1A3/GCK/ATP1B2/CHRM3/FXYD2/ATP1B1/ADCY1/PRKCB	9
hsa04915	hsa04915	Estrogen signaling pathway	13/499	138/8096	0.0827413	0.347513	0.292394	PGR/ESR1/FKBP5/KRT18/PIK3R3/ITPR2/KRT36/ESR2/KCNJ6/ADCY1/KRT15/KRT9/SHC4	13
hsa04725	hsa04725	Cholinergic synapse	11/499	113/8096	0.0877994	0.363564	0.305898	GNB3/PIK3R3/ITPR2/GNG13/CHRM3/CAMK4/KCNJ6/CHRNB2/ADCY1/PRKCB/GNGT2	11
hsa04360	hsa04360	Axon guidance	16/499	182/8096	0.095283	0.38325	0.322463	SEMA3B/SEMA3C/PAK3/EFNB3/UNC5A/PIK3R3/BMPR1B/TRPC3/GDF7/EPHA5/UNC5D/PLXNB1/ROBO1/ROBO2/SLIT1/L1CAM	16
hsa00061	hsa00061	Fatty acid biosynthesis	3/499	18/8096	0.0953579	0.38325	0.322463	ACSBG1/ACSL6/HSD17B8	3
hsa04976	hsa04976	Bile secretion	9/499	89/8096	0.0964643	0.38325	0.322463	ABCB4/NR1H4/KCNN2/ATP1A3/ATP1B2/FXYD2/ATP1B1/CYP3A4/ADCY1	9
hsa05410	hsa05410	Hypertrophic cardiomyopathy	9/499	90/8096	0.101686	0.398608	0.335384	CACNG5/CACNG4/MYH7/ITGB8/ITGA4/AGT/MYL3/PRKAA2/CACNB4	9
hsa04020	hsa04020	Calcium signaling pathway	20/499	240/8096	0.103158	0.399057	0.335762	CD38/CCKBR/ITPR2/CHRM3/HTR2B/EDNRB/ITPKA/NTRK3/GNAL/NTRK2/CAMK4/PDE1C/ADCY1/PRKCB/ADRB2/CYSLTR1/CAMK1D/GRIN2A/PLCD1/PLN	20
hsa04625	hsa04625	C-type lectin receptor signaling pathway	10/499	104/8096	0.106768	0.407658	0.342999	CD209/STAT1/PIK3R3/ITPR2/IRF1/CASP1/SYK/CLEC4D/EGR3/IRF9	10
hsa00531	hsa00531	Glycosaminoglycan degradation	3/499	19/8096	0.108295	0.408188	0.343445	HYAL1/HPSE2/HPSE	3
hsa05165	hsa05165	Human papillomavirus infection	26/499	331/8096	0.119051	0.443051	0.372778	FAS/WNT11/COL9A3/ITGB8/VTN/FZD10/ITGA4/STAT1/PIK3R3/FASLG/SPP1/RBPJL/IRF1/CRB3/CCNA1/COL2A1/PPP2R2B/PTGER4/HES3/THBS2/RELN/HLA-C/HLA-F/COL6A6/IRF9/HLA-B	26
hsa00410	hsa00410	beta-Alanine metabolism	4/499	31/8096	0.12065	0.443388	0.373062	UPB1/EHHADH/GAD1/DPYD	4
hsa04723	hsa04723	Retrograde endocannabinoid signaling	13/499	148/8096	0.124265	0.443434	0.3731	GABRP/GABRE/GNB3/CNR1/ITPR2/GNG13/GABRR1/KCNJ6/GABRB1/ADCY1/PRKCB/GNGT2/GABRD	13
hsa04014	hsa04014	Ras signaling pathway	19/499	232/8096	0.124279	0.443434	0.3731	RASGRF1/NGFR/PAK3/RASAL3/RASAL1/GNB3/ZAP70/PIK3R3/FASLG/GNG13/PLA1A/NTRK2/KIT/PRKCB/GNGT2/RASGRP1/GRIN2A/SHC4/NTF4	19
hsa04630	hsa04630	JAK-STAT signaling pathway	14/499	162/8096	0.125187	0.443434	0.3731	IL12RB2/IL12RB1/IL21R/IL7/IFNG/STAT1/PIK3R3/IL13RA2/CTF1/IL20/IL15/PRL/IRF9/CNTF	14
hsa05152	hsa05152	Tuberculosis	15/499	180/8096	0.143458	0.499263	0.420075	CD74/CD209/IFNG/STAT1/FCGR1A/SYK/NOD2/TLR1/HLA-DQB1/HLA-DRB1/HLA-DRB5/FCGR3A/HLA-DOA/HLA-DRA/HLA-DOB	15
hsa00430	hsa00430	Taurine and hypotaurine metabolism	2/499	11/8096	0.144345	0.499263	0.420075	GAD1/CDO1	2
hsa04022	hsa04022	cGMP-PKG signaling pathway	14/499	167/8096	0.148652	0.501028	0.42156	MYH7/ATP1A3/ITPR2/ATP1B2/IRS4/EDNRB/GATA4/FXYD2/ATP1B1/ADCY1/ADRB2/PDE3A/ADRA2C/PLN	14
hsa00340	hsa00340	Histidine metabolism	3/499	22/8096	0.1507	0.501028	0.42156	MAOB/HNMT/UROC1	3
hsa00770	hsa00770	Pantothenate and CoA biosynthesis	3/499	22/8096	0.1507	0.501028	0.42156	UPB1/VNN2/DPYD	3
hsa05145	hsa05145	Toxoplasmosis	10/499	112/8096	0.151672	0.501028	0.42156	BIRC3/IFNG/STAT1/CCR5/HLA-DQB1/HLA-DRB1/HLA-DRB5/HLA-DOA/HLA-DRA/HLA-DOB	10
hsa05163	hsa05163	Human cytomegalovirus infection	18/499	225/8096	0.153426	0.501191	0.421697	FAS/GNB3/PIK3R3/FASLG/ITPR2/GNG13/CCR5/ADCY1/PRKCB/B2M/GNGT2/TAP1/PTGER4/HLA-C/HLA-F/HLA-B/CCL5/CCL4	18
hsa05207	hsa05207	Chemical carcinogenesis - receptor activation	17/499	212/8096	0.159536	0.515425	0.433673	GSTO2/RPS6KA2/PGR/DLL3/ESR1/PIK3R3/DLL4/AIPL1/KLF4/ESR2/CHRNB2/CYP3A4/ADCY1/PRKCB/ADRB2/EPHX4/GSTA3	17
hsa04978	hsa04978	Mineral absorption	6/499	60/8096	0.162875	0.520493	0.437937	ATP1A3/ATP1B2/FXYD2/ATP1B1/STEAP1/MT1M	6
hsa04380	hsa04380	Osteoclast differentiation	11/499	128/8096	0.165031	0.52171	0.438961	IFNG/STAT1/FHL2/PIK3R3/TNFRSF11A/FCGR1A/CAMK4/SYK/LCK/FCGR3A/IRF9	11
hsa00512	hsa00512	Mucin type O-glycan biosynthesis	4/499	36/8096	0.178919	0.559598	0.47084	GALNT13/GCNT4/B3GNT3/GALNT17	4
hsa05133	hsa05133	Pertussis	7/499	76/8096	0.186571	0.577387	0.485807	IRF1/CASP1/C1R/C1QB/C1S/C4B/C4A	7
hsa04620	hsa04620	Toll-like receptor signaling pathway	9/499	104/8096	0.190603	0.577831	0.48618	STAT1/PIK3R3/SPP1/CXCL9/CXCL10/CXCL11/TLR1/CCL5/CCL4	9
hsa04623	hsa04623	Cytosolic DNA-sensing pathway	6/499	63/8096	0.190645	0.577831	0.48618	ZBP1/CASP1/AIM2/CXCL10/CCL5/CCL4	6
hsa00270	hsa00270	Cysteine and methionine metabolism	5/499	50/8096	0.192949	0.578848	0.487036	CDO1/BHMT2/AHCYL2/LDHC/LDHAL6A	5
hsa05412	hsa05412	Arrhythmogenic right ventricular cardiomyopathy	7/499	77/8096	0.195183	0.579635	0.487698	CACNG5/CACNG4/DSP/ITGB8/ITGA4/JUP/CACNB4	7
hsa04151	hsa04151	PI3K-Akt signaling pathway	26/499	354/8096	0.199966	0.587899	0.494652	NGFR/COL9A3/IL7/ITGB8/VTN/AREG/GNB3/ITGA4/PIK3R3/FASLG/SPP1/PCK1/GNG13/COL2A1/NTRK2/PPP2R2B/KIT/PRKAA2/SYK/GNGT2/LPAR3/PRL/THBS2/RELN/COL6A6/NTF4	26
hsa04927	hsa04927	Cortisol synthesis and secretion	6/499	65/8096	0.210097	0.611569	0.514568	KCNK2/ITPR2/AGT/CYP11A1/STAR/ADCY1	6
hsa04950	hsa04950	Maturity onset diabetes of the young	3/499	26/8096	0.213667	0.615864	0.518181	GCK/FOXA2/PKLR	3
hsa00010	hsa00010	Glycolysis / Gluconeogenesis	6/499	67/8096	0.230209	0.645096	0.542777	GCK/PCK1/FBP2/PKLR/LDHC/LDHAL6A	6
hsa05221	hsa05221	Acute myeloid leukemia	6/499	67/8096	0.230209	0.645096	0.542777	RUNX1T1/PIK3R3/CCNA1/FCGR1A/KIT/JUP	6
hsa04371	hsa04371	Apelin signaling pathway	11/499	138/8096	0.230391	0.645096	0.542777	CDH1/GNB3/SPP1/ITPR2/GNG13/CAMK4/MYL3/PRKAA2/ADCY1/GNGT2/MAP1LC3C	11
hsa00604	hsa00604	Glycosphingolipid biosynthesis - ganglio series	2/499	15/8096	0.235428	0.651893	0.548495	ST8SIA1/B4GALNT1	2
hsa00650	hsa00650	Butanoate metabolism	3/499	28/8096	0.246987	0.651893	0.548495	ACSM3/EHHADH/GAD1	3
hsa04713	hsa04713	Circadian entrainment	8/499	97/8096	0.247592	0.651893	0.548495	RASD1/GNB3/GNG13/KCNJ6/ADCY1/PRKCB/GNGT2/GRIN2A	8
hsa04924	hsa04924	Renin secretion	6/499	69/8096	0.250901	0.651893	0.548495	ITPR2/AGT/PDE1C/ADRB2/PTGER4/PDE3A	6
hsa05031	hsa05031	Amphetamine addiction	6/499	69/8096	0.250901	0.651893	0.548495	MAOB/PPP1R1B/SLC6A3/CAMK4/PRKCB/GRIN2A	6
hsa04668	hsa04668	TNF signaling pathway	9/499	112/8096	0.252714	0.651893	0.548495	BIRC3/FAS/PIK3R3/IRF1/IL15/NOD2/CXCL10/LTA/CCL5	9
hsa01522	hsa01522	Endocrine resistance	8/499	98/8096	0.256352	0.651893	0.548495	DLL3/ESR1/BIK/PIK3R3/DLL4/ESR2/ADCY1/SHC4	8
hsa04750	hsa04750	Inflammatory mediator regulation of TRP channels	8/499	98/8096	0.256352	0.651893	0.548495	TRPA1/PIK3R3/ITPR2/HTR2B/ADCY1/PRKCB/PTGER4/TRPV2	8
hsa04510	hsa04510	Focal adhesion	15/499	201/8096	0.257137	0.651893	0.548495	BIRC3/RASGRF1/PAK3/COL9A3/ITGB8/VTN/ITGA4/PIK3R3/SPP1/COL2A1/PRKCB/SHC4/THBS2/RELN/COL6A6	15
hsa00380	hsa00380	Tryptophan metabolism	4/499	42/8096	0.258293	0.651893	0.548495	MAOB/EHHADH/KYNU/IDO1	4
hsa00730	hsa00730	Thiamine metabolism	2/499	16/8096	0.258833	0.651893	0.548495	AK5/AK4	2
hsa05230	hsa05230	Central carbon metabolism in cancer	6/499	70/8096	0.261438	0.651893	0.548495	GCK/PIK3R3/NTRK3/KIT/LDHC/LDHAL6A	6
hsa00240	hsa00240	Pyrimidine metabolism	5/499	56/8096	0.261644	0.651893	0.548495	RRM2B/UPB1/NT5E/ENTPD1/DPYD	5
hsa04744	hsa04744	Phototransduction	3/499	29/8096	0.26394	0.652087	0.548659	RCVRN/GNAT1/PDE6A	3
hsa04724	hsa04724	Glutamatergic synapse	9/499	114/8096	0.269211	0.659568	0.554954	SLC1A1/GNB3/ITPR2/GNG13/ADCY1/PRKCB/GNGT2/GRM8/GRIN2A	9
hsa04742	hsa04742	Taste transduction	7/499	86/8096	0.278792	0.669238	0.563089	GNB3/GNG13/CHRM3/HTR3B/PDE1C/TAS1R1/HTR1A	7
hsa05205	hsa05205	Proteoglycans in cancer	15/499	205/8096	0.281971	0.669238	0.563089	FAS/ANK1/WNT11/ESR1/TIMP3/VTN/FZD10/PIK3R3/FASLG/TWIST1/ITPR2/PRKCB/SDC2/HPSE2/HPSE	15
hsa00120	hsa00120	Primary bile acid biosynthesis	2/499	17/8096	0.282264	0.669238	0.563089	CYP39A1/ACOX2	2
hsa00910	hsa00910	Nitrogen metabolism	2/499	17/8096	0.282264	0.669238	0.563089	CPS1/CA4	2
hsa01524	hsa01524	Platinum drug resistance	6/499	73/8096	0.293688	0.690755	0.581194	BIRC3/FAS/GSTO2/PIK3R3/FASLG/GSTA3	6
hsa04540	hsa04540	Gap junction	7/499	88/8096	0.298532	0.696574	0.586089	TUBB4A/ITPR2/HTR2B/ADCY1/PRKCB/TUBAL3/TUBB3	7
hsa05167	hsa05167	Kaposi sarcoma-associated herpesvirus infection	14/499	194/8096	0.308922	0.715142	0.601713	FAS/GNB3/STAT1/PIK3R3/ITPR2/GNG13/CCR5/SYK/GNGT2/MAP1LC3C/HLA-C/HLA-F/IRF9/HLA-B	14
hsa04722	hsa04722	Neurotrophin signaling pathway	9/499	119/8096	0.311741	0.716031	0.602461	NGFR/RPS6KA2/PIK3R3/FASLG/NTRK3/NTRK2/CAMK4/SHC4/NTF4	9
hsa04930	hsa04930	Type II diabetes mellitus	4/499	46/8096	0.314493	0.716751	0.603067	GCK/PIK3R3/IRS4/PKLR	4
hsa04213	hsa04213	Longevity regulating pathway - multiple species	5/499	62/8096	0.334938	0.757476	0.637332	PIK3R3/FOXA2/IRS4/PRKAA2/ADCY1	5
hsa04931	hsa04931	Insulin resistance	8/499	108/8096	0.34816	0.77523	0.65227	RPS6KA2/PIK3R3/PCK1/AGT/SLC27A2/PRKAA2/PRKCB/PPP1R3B	8
hsa00640	hsa00640	Propanoate metabolism	3/499	34/8096	0.349948	0.77523	0.65227	EHHADH/LDHC/LDHAL6A	3
hsa04921	hsa04921	Oxytocin signaling pathway	11/499	154/8096	0.350892	0.77523	0.65227	CD38/CACNG5/CACNG4/ITPR2/CAMK4/KCNJ6/PRKAA2/ADCY1/PRKCB/CACNB4/CAMK1D	11
hsa05162	hsa05162	Measles	10/499	139/8096	0.353336	0.77523	0.65227	FAS/CD209/STAT1/SLAMF1/PIK3R3/FASLG/CD3G/CD3D/CD3E/IRF9	10
hsa05030	hsa05030	Cocaine addiction	4/499	49/8096	0.35732	0.778163	0.654738	MAOB/PPP1R1B/SLC6A3/GRIN2A	4
hsa00760	hsa00760	Nicotinate and nicotinamide metabolism	3/499	35/8096	0.367139	0.791697	0.666125	CD38/NMRK2/NT5E	3
hsa00983	hsa00983	Drug metabolism - other enzymes	6/499	80/8096	0.371333	0.791697	0.666125	RRM2B/GSTO2/UPB1/CYP3A4/GSTA3/DPYD	6
hsa05144	hsa05144	Malaria	4/499	50/8096	0.371613	0.791697	0.666125	IFNG/SDC2/THBS2/KLRK1	4
hsa05203	hsa05203	Viral carcinogenesis	14/499	204/8096	0.377937	0.799378	0.672588	SCIN/PIK3R3/RBPJL/CCNA1/CCR5/HDAC11/SYK/EGR3/H2BC13/HLA-C/HLA-F/IRF9/HLA-B/H4C5	14
hsa04913	hsa04913	Ovarian steroidogenesis	4/499	51/8096	0.385883	0.803398	0.675971	HSD17B1/CYP11A1/STAR/ADCY1	4
hsa04613	hsa04613	Neutrophil extracellular trap formation	13/499	190/8096	0.389387	0.803398	0.675971	PIK3R3/CASP1/FCGR1A/HDAC11/SYK/PRKCB/H2AC6/H2BC13/FCGR3A/H3C6/H2AC12/H4C5/H3C10	13
hsa04666	hsa04666	Fc gamma R-mediated phagocytosis	7/499	97/8096	0.390015	0.803398	0.675971	SCIN/PTPRC/PIK3R3/FCGR1A/SYK/PRKCB/FCGR3A	7
hsa04217	hsa04217	Necroptosis	11/499	159/8096	0.390769	0.803398	0.675971	BIRC3/FAS/IFNG/STAT1/FASLG/ZBP1/CASP1/CHMP4C/H2AC6/IRF9/H2AC12	11
hsa04662	hsa04662	B cell receptor signaling pathway	6/499	82/8096	0.393771	0.80395	0.676434	CD22/DAPP1/PIK3R3/SYK/PRKCB/CARD11	6
hsa04670	hsa04670	Leukocyte transendothelial migration	8/499	114/8096	0.405261	0.821702	0.691371	RAPGEF3/ITK/ITGA4/PIK3R3/CLDN1/PRKCB/RHOH/CLDN7	8
hsa04614	hsa04614	Renin-angiotensin system	2/499	23/8096	0.418952	0.838531	0.705531	ACE2/AGT	2
hsa05224	hsa05224	Breast cancer	10/499	147/8096	0.420757	0.838531	0.705531	PGR/WNT11/DLL3/ESR1/FZD10/PIK3R3/DLL4/ESR2/KIT/SHC4	10
hsa04920	hsa04920	Adipocytokine signaling pathway	5/499	69/8096	0.422118	0.838531	0.705531	ACSBG1/PCK1/IRS4/PRKAA2/ACSL6	5
hsa04916	hsa04916	Melanogenesis	7/499	101/8096	0.431095	0.850618	0.715701	DCT/WNT11/FZD10/EDNRB/KIT/ADCY1/PRKCB	7
hsa04977	hsa04977	Vitamin digestion and absorption	2/499	24/8096	0.440544	0.859267	0.722978	RBP2/SLC19A3	2
hsa05146	hsa05146	Amoebiasis	7/499	102/8096	0.441324	0.859267	0.722978	IFNG/IL1R2/PIK3R3/GNAL/ADCY1/PRKCB/SERPINB9	7
hsa04935	hsa04935	Growth hormone synthesis, secretion and action	8/499	119/8096	0.452873	0.861159	0.72457	STAT1/PIK3R3/ITPR2/IRS4/GHRL/ADCY1/PRKCB/SHC4	8
hsa05223	hsa05223	Non-small cell lung cancer	5/499	72/8096	0.459014	0.861159	0.72457	PIK3R3/KIF5A/PRKCB/KIF5C/ALK	5
hsa05171	hsa05171	Coronavirus disease - COVID-19	15/499	232/8096	0.462624	0.861159	0.72457	STAT1/PIK3R3/ACE2/CASP1/RPL3L/C1R/SYK/PRKCB/CXCL10/C1QB/C1S/TMPRSS2/IRF9/C4B/C4A	15
hsa04210	hsa04210	Apoptosis	9/499	136/8096	0.462725	0.861159	0.72457	BIRC3/FAS/GZMB/PIK3R3/FASLG/ITPR2/CTSW/TUBAL3/PRF1	9
hsa04216	hsa04216	Ferroptosis	3/499	41/8096	0.467684	0.861159	0.72457	CP/ACSL6/MAP1LC3C	3
hsa01212	hsa01212	Fatty acid metabolism	4/499	57/8096	0.470075	0.861159	0.72457	ACSBG1/EHHADH/ACSL6/HSD17B8	4
hsa04923	hsa04923	Regulation of lipolysis in adipocytes	4/499	57/8096	0.470075	0.861159	0.72457	PIK3R3/IRS4/ADCY1/ADRB2	4
hsa04530	hsa04530	Tight junction	11/499	169/8096	0.471013	0.861159	0.72457	MPP4/MYH14/AMOTL2/CGNL1/CRB3/GATA4/PPP2R2B/PRKAA2/CLDN1/TUBAL3/CLDN7	11
hsa04910	hsa04910	Insulin signaling pathway	9/499	137/8096	0.471587	0.861159	0.72457	GCK/PIK3R3/PCK1/FBP2/IRS4/PKLR/PRKAA2/PPP1R3B/SHC4	9
hsa05135	hsa05135	Yersinia infection	9/499	137/8096	0.471587	0.861159	0.72457	RPS6KA2/ZAP70/ITGA4/PIK3R3/WIPF3/CASP1/CD8A/CD8B/LCK	9
hsa04928	hsa04928	Parathyroid hormone synthesis, secretion and action	7/499	106/8096	0.481882	0.872497	0.734109	MMP25/CYP24A1/ITPR2/PTH1R/ADCY1/PRKCB/PDE4B	7
hsa00480	hsa00480	Glutathione metabolism	4/499	58/8096	0.483731	0.872497	0.734109	RRM2B/GSTO2/CHAC1/GSTA3	4
hsa04934	hsa04934	Cushing syndrome	10/499	155/8096	0.488029	0.874881	0.736115	KCNK2/WNT11/RASD1/FZD10/ITPR2/AIPL1/AGT/CYP11A1/STAR/ADCY1	10
hsa04922	hsa04922	Glucagon signaling pathway	7/499	107/8096	0.491903	0.876481	0.737462	GCK/ITPR2/PCK1/FBP2/PRKAA2/LDHC/LDHAL6A	7
hsa05214	hsa05214	Glioma	5/499	75/8096	0.495213	0.877064	0.737952	PIK3R3/CAMK4/PRKCB/CAMK1D/SHC4	5
hsa00071	hsa00071	Fatty acid degradation	3/499	43/8096	0.499662	0.877832	0.738598	ACSBG1/EHHADH/ACSL6	3
hsa04390	hsa04390	Hippo signaling pathway	10/499	157/8096	0.504604	0.877832	0.738598	BIRC3/CDH1/GLI2/WNT11/AREG/FZD10/CRB1/BMPR1B/GDF7/PPP2R2B	10
hsa05160	hsa05160	Hepatitis C	10/499	157/8096	0.504604	0.877832	0.738598	FAS/IFNG/STAT1/PIK3R3/FASLG/PPP2R2B/CLDN1/CXCL10/CLDN7/IRF9	10
hsa00140	hsa00140	Steroid hormone biosynthesis	4/499	61/8096	0.523803	0.89836	0.755871	HSD17B1/CYP11A1/CYP3A4/HSD17B8	4
hsa05017	hsa05017	Spinocerebellar ataxia	9/499	143/8096	0.523996	0.89836	0.755871	TWNK/PIK3R3/ITPR2/RBPJL/TRPC3/PRKCB/DAB1/GRIN2A/RELN	9
hsa04350	hsa04350	TGF-beta signaling pathway	6/499	94/8096	0.525571	0.89836	0.755871	LTBP1/BAMBI/IFNG/BMPR1B/GDF7/PITX2	6
hsa04721	hsa04721	Synaptic vesicle cycle	5/499	78/8096	0.530475	0.9015	0.758512	SLC1A1/SLC6A3/CPLX2/SLC6A1/CPLX4	5
hsa03050	hsa03050	Proteasome	3/499	46/8096	0.545717	0.920616	0.774596	IFNG/PSMB8/PSMB9	3
hsa05217	hsa05217	Basal cell carcinoma	4/499	63/8096	0.549672	0.920616	0.774596	GLI2/WNT11/FZD10/HHIP	4
hsa04070	hsa04070	Phosphatidylinositol signaling system	6/499	97/8096	0.556838	0.920616	0.774596	SYNJ2/PIK3R3/ITPR2/ITPKA/PRKCB/PLCD1	6
hsa00030	hsa00030	Pentose phosphate pathway	2/499	30/8096	0.559905	0.920616	0.774596	TKTL1/FBP2	2
hsa05130	hsa05130	Pathogenic Escherichia coli infection	12/499	197/8096	0.560242	0.920616	0.774596	FAS/PAK3/TUBB4A/MYH14/FASLG/WIPF3/MYO1G/CASP1/CLDN1/TUBAL3/CLDN7/TUBB3	12
hsa00514	hsa00514	Other types of O-glycan biosynthesis	3/499	47/8096	0.560511	0.920616	0.774596	GALNT13/GXYLT2/GALNT17	3
hsa04072	hsa04072	Phospholipase D signaling pathway	9/499	148/8096	0.566285	0.924932	0.778228	RAPGEF3/PIK3R3/AGT/KIT/ADCY1/SYK/LPAR3/GRM8/SHC4	9
hsa04146	hsa04146	Peroxisome	5/499	82/8096	0.575691	0.933616	0.785534	EHHADH/SLC27A2/ACSL6/ACOX2/ABCD2	5
hsa04710	hsa04710	Circadian rhythm	2/499	31/8096	0.577953	0.933616	0.785534	RORC/PRKAA2	2
hsa04914	hsa04914	Progesterone-mediated oocyte maturation	6/499	100/8096	0.587118	0.94324	0.793632	RPS6KA2/PGR/PIK3R3/CCNA1/ADCY1/SPDYC	6
hsa04215	hsa04215	Apoptosis - multiple species	2/499	32/8096	0.595453	0.95143	0.800523	BIRC3/NGFR	2
hsa04012	hsa04012	ErbB signaling pathway	5/499	85/8096	0.608051	0.966308	0.813041	PAK3/AREG/PIK3R3/PRKCB/SHC4	5
hsa04152	hsa04152	AMPK signaling pathway	7/499	120/8096	0.615172	0.967256	0.813839	PIK3R3/PCK1/FBP2/CCNA1/IRS4/PPP2R2B/PRKAA2	7
hsa00603	hsa00603	Glycosphingolipid biosynthesis - globo and isoglobo series	1/499	15/8096	0.615228	0.967256	0.813839	ST8SIA1	1
hsa05204	hsa05204	Chemical carcinogenesis - DNA adducts	4/499	69/8096	0.622549	0.973561	0.819144	GSTO2/CYP3A4/GSTA3/SULT1A1	4
hsa05418	hsa05418	Fluid shear stress and atherosclerosis	8/499	139/8096	0.631186	0.981845	0.826114	GSTO2/IFNG/IL1R2/PIK3R3/BMPR1B/PRKAA2/SDC2/GSTA3	8
hsa04211	hsa04211	Longevity regulating pathway	5/499	89/8096	0.648905	0.995376	0.837498	PIK3R3/IRS4/CAMK4/PRKAA2/ADCY1	5
hsa04611	hsa04611	Platelet activation	7/499	124/8096	0.649714	0.995376	0.837498	PIK3R3/VAMP8/ITPR2/FERMT3/ADCY1/SYK/RASGRP1	7
hsa04015	hsa04015	Rap1 signaling pathway	12/499	210/8096	0.650041	0.995376	0.837498	CDH1/NGFR/RAPGEF3/SIPA1L2/PIK3R3/CNR1/DOCK4/KIT/ADCY1/PRKCB/LPAR3/GRIN2A	12
hsa00982	hsa00982	Drug metabolism - cytochrome P450	4/499	72/8096	0.656069	0.99701	0.838874	GSTO2/MAOB/CYP3A4/GSTA3	4
hsa00350	hsa00350	Tyrosine metabolism	2/499	36/8096	0.659985	0.99701	0.838874	MAOB/DCT	2
hsa00360	hsa00360	Phenylalanine metabolism	1/499	17/8096	0.661282	0.99701	0.838874	MAOB	1
hsa00250	hsa00250	Alanine, aspartate and glutamate metabolism	2/499	37/8096	0.67477	1	0.841389	CPS1/GAD1	2
hsa04340	hsa04340	Hedgehog signaling pathway	3/499	56/8096	0.679753	1	0.841389	GLI2/HHIP/GAS1	3
hsa04926	hsa04926	Relaxin signaling pathway	7/499	129/8096	0.690217	1	0.841389	GNB3/PIK3R3/GNG13/EDNRB/ADCY1/GNGT2/SHC4	7
hsa04310	hsa04310	Wnt signaling pathway	9/499	166/8096	0.702741	1	0.841389	WNT11/BAMBI/SFRP1/RNF43/FZD10/LGR6/RSPO3/PRKCB/CTNND2	9
hsa04330	hsa04330	Notch signaling pathway	3/499	59/8096	0.713737	1	0.841389	DLL3/RBPJL/DLL4	3
hsa05020	hsa05020	Prion disease	15/499	273/8096	0.71652	1	0.841389	TUBB4A/KLC3/PIK3R3/ITPR2/NCAM1/NCAM2/KIF5A/COX6A2/COX7A1/KIF5C/C1QB/TUBAL3/GRIN2A/TUBB3/CCL5	15
hsa00100	hsa00100	Steroid biosynthesis	1/499	20/8096	0.720255	1	0.841389	CYP24A1	1
hsa00532	hsa00532	Glycosaminoglycan biosynthesis - chondroitin sulfate / dermatan sulfate	1/499	20/8096	0.720255	1	0.841389	CSGALNACT1	1
hsa00670	hsa00670	One carbon pool by folate	1/499	20/8096	0.720255	1	0.841389	ALDH1L1	1
hsa01200	hsa01200	Carbon metabolism	6/499	115/8096	0.720518	1	0.841389	TKTL1/CPS1/ME1/GCK/FBP2/PKLR	6
hsa04730	hsa04730	Long-term depression	3/499	60/8096	0.724429	1	0.841389	ITPR2/GNAZ/PRKCB	3
hsa00564	hsa00564	Glycerophospholipid metabolism	5/499	98/8096	0.730487	1	0.841389	GPAT3/PLA1A/GPD1L/ETNPPL/PHOSPHO1	5
hsa00561	hsa00561	Glycerolipid metabolism	3/499	61/8096	0.734806	1	0.841389	PNPLA3/MOGAT1/GPAT3	3
hsa04933	hsa04933	AGE-RAGE signaling pathway in diabetic complications	5/499	100/8096	0.746619	1	0.841389	STAT1/PIK3R3/AGT/PRKCB/PLCD1	5
hsa00220	hsa00220	Arginine biosynthesis	1/499	22/8096	0.753759	1	0.841389	CPS1	1
hsa05132	hsa05132	Salmonella infection	13/499	249/8096	0.772377	1	0.841389	BIRC3/PAK3/PTPRC/TUBB4A/KLC3/CASP1/CASP5/KIF5A/KIF5C/RHOH/TUBAL3/AHNAK2/TUBB3	13
hsa04066	hsa04066	HIF-1 signaling pathway	5/499	109/8096	0.810397	1	0.841389	IFNG/PIK3R3/PRKCB/LDHC/LDHAL6A	5
hsa04010	hsa04010	MAPK signaling pathway	15/499	294/8096	0.812877	1	0.841389	FAS/RASGRF1/NGFR/RPS6KA2/CACNG5/CACNG4/AREG/FASLG/PTPN7/NTRK2/KIT/PRKCB/RASGRP1/CACNB4/NTF4	15
hsa00565	hsa00565	Ether lipid metabolism	2/499	49/8096	0.814087	1	0.841389	ENPP2/GDPD1	2
hsa04979	hsa04979	Cholesterol metabolism	2/499	50/8096	0.822878	1	0.841389	ANGPTL3/STAR	2
hsa00330	hsa00330	Arginine and proline metabolism	2/499	51/8096	0.831295	1	0.841389	MAOB/PRODH	2
hsa00562	hsa00562	Inositol phosphate metabolism	3/499	73/8096	0.836443	1	0.841389	SYNJ2/ITPKA/PLCD1	3
hsa00591	hsa00591	Linoleic acid metabolism	1/499	29/8096	0.842477	1	0.841389	CYP3A4	1
hsa05012	hsa05012	Parkinson disease	13/499	266/8096	0.84433	1	0.841389	MAOB/TUBB4A/KLC3/ITPR2/GNAL/SLC6A3/KIF5A/COX6A2/COX7A1/KIF5C/TUBAL3/LRRK2/TUBB3	13
hsa01230	hsa01230	Biosynthesis of amino acids	3/499	75/8096	0.849654	1	0.841389	TKTL1/CPS1/PKLR	3
hsa04932	hsa04932	Non-alcoholic fatty liver disease	7/499	155/8096	0.850012	1	0.841389	FAS/PIK3R3/FASLG/PKLR/COX6A2/COX7A1/PRKAA2	7
hsa00020	hsa00020	Citrate cycle (TCA cycle)	1/499	30/8096	0.852221	1	0.841389	PCK1	1
hsa04218	hsa04218	Cellular senescence	7/499	156/8096	0.854522	1	0.841389	PIK3R3/ITPR2/CCNA1/GATA4/HLA-C/HLA-F/HLA-B	7
hsa05215	hsa05215	Prostate cancer	4/499	97/8096	0.8569	1	0.841389	IL1R2/PIK3R3/SPINT1/TMPRSS2	4
hsa00052	hsa00052	Galactose metabolism	1/499	31/8096	0.861363	1	0.841389	GCK	1
hsa05100	hsa05100	Bacterial invasion of epithelial cells	3/499	77/8096	0.861926	1	0.841389	CDH1/PIK3R3/SHC4	3
hsa00980	hsa00980	Metabolism of xenobiotics by cytochrome P450	3/499	78/8096	0.867727	1	0.841389	GSTO2/CYP3A4/GSTA3	3
hsa04136	hsa04136	Autophagy - other	1/499	32/8096	0.869941	1	0.841389	ATG9B	1
hsa01521	hsa01521	EGFR tyrosine kinase inhibitor resistance	3/499	79/8096	0.873312	1	0.841389	PIK3R3/PRKCB/SHC4	3
hsa04140	hsa04140	Autophagy - animal	6/499	141/8096	0.874429	1	0.841389	PIK3R3/VAMP8/IRS4/PRKAA2/ATG9B/MAP1LC3C	6
hsa00051	hsa00051	Fructose and mannose metabolism	1/499	33/8096	0.877989	1	0.841389	FBP2	1
hsa04130	hsa04130	SNARE interactions in vesicular transport	1/499	33/8096	0.877989	1	0.841389	VAMP8	1
hsa05161	hsa05161	Hepatitis B	7/499	162/8096	0.879325	1	0.841389	FAS/STAT1/PIK3R3/FASLG/CCNA1/PRKCB/EGR3	7
hsa05213	hsa05213	Endometrial cancer	2/499	58/8096	0.880764	1	0.841389	CDH1/PIK3R3	2
hsa04550	hsa04550	Signaling pathways regulating pluripotency of stem cells	6/499	143/8096	0.882584	1	0.841389	WNT11/FZD10/PIK3R3/KLF4/BMPR1B/POU5F1B	6
hsa04370	hsa04370	VEGF signaling pathway	2/499	59/8096	0.886624	1	0.841389	PIK3R3/PRKCB	2
hsa00500	hsa00500	Starch and sucrose metabolism	1/499	36/8096	0.899272	1	0.841389	GCK	1
hsa05225	hsa05225	Hepatocellular carcinoma	7/499	168/8096	0.900514	1	0.841389	GSTO2/WNT11/FZD10/PIK3R3/PRKCB/GSTA3/SHC4	7
hsa05226	hsa05226	Gastric cancer	6/499	149/8096	0.904415	1	0.841389	CDH1/WNT11/FZD10/PIK3R3/JUP/SHC4	6
hsa05216	hsa05216	Thyroid cancer	1/499	37/8096	0.905508	1	0.841389	CDH1	1
hsa04114	hsa04114	Oocyte meiosis	5/499	129/8096	0.906549	1	0.841389	RPS6KA2/PGR/ITPR2/ADCY1/SPDYC	5
hsa00310	hsa00310	Lysine degradation	2/499	63/8096	0.907495	1	0.841389	PRDM6/EHHADH	2
hsa04068	hsa04068	FoxO signaling pathway	5/499	131/8096	0.9133	1	0.841389	PIK3R3/FASLG/PCK1/IRS4/PRKAA2	5
hsa05022	hsa05022	Pathways of neurodegeneration - multiple diseases	23/499	476/8096	0.914272	1	0.841389	FAS/WNT11/TUBB4A/KLC3/FZD10/FASLG/DNAI1/ITPR2/CHRM3/TRPC3/SLC6A3/KIF5A/COX6A2/COX7A1/DNALI1/PRKCB/KIF5C/TUBAL3/GRIN2A/DNAH2/LRRK2/MAP1LC3C/TUBB3	23
hsa00513	hsa00513	Various types of N-glycan biosynthesis	1/499	39/8096	0.916848	1	0.841389	MAN1C1	1
hsa04270	hsa04270	Vascular smooth muscle contraction	5/499	133/8096	0.919619	1	0.841389	MYH14/ITPR2/AGT/ADCY1/PRKCB	5
hsa00260	hsa00260	Glycine, serine and threonine metabolism	1/499	40/8096	0.921998	1	0.841389	MAOB	1
hsa04150	hsa04150	mTOR signaling pathway	6/499	155/8096	0.922664	1	0.841389	RPS6KA2/WNT11/FZD10/PIK3R3/PRKAA2/PRKCB	6
hsa05219	hsa05219	Bladder cancer	1/499	41/8096	0.926829	1	0.841389	CDH1	1
hsa00830	hsa00830	Retinol metabolism	2/499	68/8096	0.928542	1	0.841389	CYP3A4/CYP27C1	2
hsa04664	hsa04664	Fc epsilon RI signaling pathway	2/499	68/8096	0.928542	1	0.841389	PIK3R3/SYK	2
hsa05211	hsa05211	Renal cell carcinoma	2/499	69/8096	0.932169	1	0.841389	PAK3/PIK3R3	2
hsa04912	hsa04912	GnRH signaling pathway	3/499	93/8096	0.932195	1	0.841389	ITPR2/ADCY1/PRKCB	3
hsa04657	hsa04657	IL-17 signaling pathway	3/499	94/8096	0.935245	1	0.841389	IFNG/IL17RE/CXCL10	3
hsa00860	hsa00860	Porphyrin and chlorophyll metabolism	1/499	43/8096	0.935615	1	0.841389	CP	1
hsa04520	hsa04520	Adherens junction	2/499	71/8096	0.938909	1	0.841389	CDH1/NECTIN4	2
hsa04071	hsa04071	Sphingolipid signaling pathway	4/499	119/8096	0.941145	1	0.841389	PIK3R3/CERS3/PPP2R2B/PRKCB	4
hsa04137	hsa04137	Mitophagy - animal	2/499	72/8096	0.942036	1	0.841389	ATG9B/MAP1LC3C	2
hsa05218	hsa05218	Melanoma	2/499	72/8096	0.942036	1	0.841389	CDH1/PIK3R3	2
hsa04115	hsa04115	p53 signaling pathway	2/499	73/8096	0.94501	1	0.841389	FAS/RRM2B	2
hsa05231	hsa05231	Choline metabolism in cancer	3/499	98/8096	0.946221	1	0.841389	PIK3R3/SLC44A3/PRKCB	3
hsa05014	hsa05014	Amyotrophic lateral sclerosis	16/499	365/8096	0.946289	1	0.841389	TUBB4A/KLC3/DNAI1/CASP1/KIF5A/COX6A2/POM121L2/COX7A1/DNALI1/KIF5C/TUBAL3/GRIN2A/DNAH2/MAP1LC3C/ANG/TUBB3	16
hsa05212	hsa05212	Pancreatic cancer	2/499	76/8096	0.953086	1	0.841389	STAT1/PIK3R3	2
hsa05220	hsa05220	Chronic myeloid leukemia	2/499	76/8096	0.953086	1	0.841389	PIK3R3/SHC4	2
hsa00280	hsa00280	Valine, leucine and isoleucine degradation	1/499	48/8096	0.953243	1	0.841389	EHHADH	1
hsa00520	hsa00520	Amino sugar and nucleotide sugar metabolism	1/499	48/8096	0.953243	1	0.841389	GCK	1
hsa04144	hsa04144	Endocytosis	10/499	252/8096	0.953405	1	0.841389	WIPF3/PSD2/KIF5A/CCR5/CHMP4C/KIF5C/RAB31/HLA-C/HLA-F/HLA-B	10
hsa00600	hsa00600	Sphingolipid metabolism	1/499	49/8096	0.956142	1	0.841389	CERS3	1
hsa00510	hsa00510	N-Glycan biosynthesis	1/499	50/8096	0.958862	1	0.841389	MAN1C1	1
hsa01240	hsa01240	Biosynthesis of cofactors	5/499	156/8096	0.967839	1	0.841389	KYNU/IDO1/PKLR/AK5/AK4	5
hsa05010	hsa05010	Alzheimer disease	16/499	384/8096	0.967974	1	0.841389	FAS/WNT11/TUBB4A/KLC3/FZD10/PIK3R3/ITPR2/CHRM3/IRS4/KIF5A/COX6A2/COX7A1/KIF5C/TUBAL3/GRIN2A/TUBB3	16
hsa05415	hsa05415	Diabetic cardiomyopathy	7/499	203/8096	0.971051	1	0.841389	PDK4/PIK3R3/AGT/COX6A2/COX7A1/PRKCB/PLN	7
hsa05210	hsa05210	Colorectal cancer	2/499	86/8096	0.972591	1	0.841389	AREG/PIK3R3	2
hsa05134	hsa05134	Legionellosis	1/499	57/8096	0.973726	1	0.841389	CASP1	1
hsa05222	hsa05222	Small cell lung cancer	2/499	92/8096	0.98025	1	0.841389	BIRC3/PIK3R3	2
hsa04810	hsa04810	Regulation of actin cytoskeleton	7/499	218/8096	0.983757	1	0.841389	SCIN/PAK3/MYH14/ITGB8/ITGA4/PIK3R3/CHRM3	7
hsa05016	hsa05016	Huntington disease	11/499	306/8096	0.984528	1	0.841389	TUBB4A/KLC3/DNAI1/KIF5A/COX6A2/COX7A1/DNALI1/KIF5C/TUBAL3/DNAH2/TUBB3	11
hsa00970	hsa00970	Aminoacyl-tRNA biosynthesis	1/499	66/8096	0.985245	1	0.841389	WARS1	1
hsa05131	hsa05131	Shigellosis	8/499	247/8096	0.987481	1	0.841389	PIK3R3/ITPR2/CASP1/PLCD1/MAP1LC3C/CCL5/H3C6/H3C10	8
hsa04142	hsa04142	Lysosome	3/499	128/8096	0.987557	1	0.841389	HYAL1/NAPSA/CTSW	3
hsa04622	hsa04622	RIG-I-like receptor signaling pathway	1/499	70/8096	0.988586	1	0.841389	CXCL10	1
hsa05120	hsa05120	Epithelial cell signaling in Helicobacter pylori infection	1/499	70/8096	0.988586	1	0.841389	CCL5	1
hsa04714	hsa04714	Thermogenesis	7/499	232/8096	0.99074	1	0.841389	RPS6KA2/CNR1/COX6A2/COX7A1/PRKAA2/ACSL6/ADCY1	7
hsa05208	hsa05208	Chemical carcinogenesis - reactive oxygen species	6/499	223/8096	0.995017	1	0.841389	GSTO2/PIK3R3/COX6A2/COX7A1/EPHX4/GSTA3	6
hsa05417	hsa05417	Lipid and atherosclerosis	5/499	215/8096	0.997717	1	0.841389	FAS/PIK3R3/FASLG/CASP1/CCL5	5
hsa03015	hsa03015	mRNA surveillance pathway	1/499	98/8096	0.998114	1	0.841389	PPP2R2B	1
hsa00190	hsa00190	Oxidative phosphorylation	2/499	134/8096	0.998162	1	0.841389	COX6A2/COX7A1	2
hsa04120	hsa04120	Ubiquitin mediated proteolysis	2/499	140/8096	0.998703	1	0.841389	BIRC3/MID1	2
hsa03013	hsa03013	Nucleocytoplasmic transport	1/499	109/8096	0.999072	1	0.841389	POM121L2	1
hsa04110	hsa04110	Cell cycle	1/499	124/8096	0.999648	1	0.841389	CCNA1	1
hsa04141	hsa04141	Protein processing in endoplasmic reticulum	2/499	171/8096	0.999791	1	0.841389	MAN1C1/CRYAA2	2
hsa05206	hsa05206	MicroRNAs in cancer	6/499	310/8096	0.99992	1	0.841389	CYP24A1/TIMP3/PIK3R3/PRKCB/SHC4/MIR221	6
hsa03010	hsa03010	Ribosome	1/499	158/8096	0.999961	1	0.841389	RPL3L	1
hsa04740	hsa04740	Olfactory transduction	6/499	443/8096	1	1	0.841389	GNG13/GNAL/PDE1C/OR52N4/OR2C3/OR2L2	6

## Sheet: GSEA of HALLMARK
	ID	Description	setSize	enrichmentScore	NES	pvalue	p.adjust	qvalues	rank	leading_edge	core_enrichment
HALLMARK_ALLOGRAFT_REJECTION	HALLMARK_ALLOGRAFT_REJECTION	HALLMARK_ALLOGRAFT_REJECTION	199	-0.645948	-2.70163	1e-10	1e-09	6.94737e-10	6983	tags=51%, list=15%, signal=43%	CSF1/IFNAR2/TLR3/CCR1/PRKCG/LYN/TAP2/EIF4G3/TPD52/STAB1/THY1/JAK2/SPI1/IL2RA/IL10/ACHE/CD40LG/FYB1/IFNGR1/BCAT1/NCF4/GLMN/HLA-DMA/HLA-DMB/PSMB10/WAS/CTSS/CFP/PTPN6/IGSF6/CD28/ST8SIA4/HLA-A/IL18/IRF8/LIF/C2/STAT4/TGFB2/CD86/GPR65/HCLS1/LCP2/TNF/BCL3/HLA-E/IL2RB/IL1B/CCR2/IL11/CCND2/HLA-DQA1/ITGAL/IL2RG/IL13/HLA-DOA/FAS/STAT1/MMP9/HLA-DRA/IL15/LY75/CD74/TAP1/CRTAM/IL7/CD247/IL18RAP/ZAP70/PRKCB/LCK/…
HALLMARK_IL6_JAK_STAT3_SIGNALING	HALLMARK_IL6_JAK_STAT3_SIGNALING	HALLMARK_IL6_JAK_STAT3_SIGNALING	87	-0.665726	-2.43245	1e-10	1e-09	6.94737e-10	7019	tags=56%, list=15%, signal=48%	CSF2/OSMR/IL9R/CSF1/CSF3R/CCR1/IL6ST/STAM2/TNFRSF1A/CD9/CSF2RA/IL2RA/LTBR/IL13RA1/CD36/TNFRSF21/CD14/IFNGR1/PIK3R5/SOCS3/TNFRSF12A/IL15RA/STAT3/MAP3K8/ITGB3/CRLF2/TNF/IL1R1/EBI3/LEPR/IL1B/CSF2RB/TNFRSF1B/IL18R1/IL2RG/FAS/STAT1/ITGA4/IRF9/IL1R2/IL7/IL12RB1/CXCL11/IRF1/CD38/LTB/CXCL10/CXCL13/CXCL9
HALLMARK_INFLAMMATORY_RESPONSE	HALLMARK_INFLAMMATORY_RESPONSE	HALLMARK_INFLAMMATORY_RESPONSE	199	-0.567885	-2.37514	1e-10	1e-09	6.94737e-10	6983	tags=45%, list=15%, signal=39%	CSF1/CSF3R/TLR3/NPFFR2/SLC31A2/LYN/PTAFR/AHR/FZD5/STAB1/SELL/TNFSF9/KIF1B/APLNR/CYBB/LPAR1/IL10/MSR1/C3AR1/CD14/SLC11A2/PCDH7/CCRL2/P2RX4/KCNJ2/GPR132/TNFSF15/ATP2B1/GCH1/IFITM1/EMP3/PIK3R5/IL7R/CXCL6/CHST2/MET/SPHK1/IL15RA/P2RY2/FPR1/PTPRE/TNFSF10/MARCO/NMUR1/IL18/SLC4A4/TACR1/FFAR2/LIF/ITGA5/IL10RA/ITGB3/LCP2/CD69/CDKN1A/BDKRB1/IL1R1/IL2RB/EBI3/CCR7/IL1B/TNFRSF1B/SERPINE1/IL18R1/MEFV/BST2/NOD2/…
HALLMARK_INTERFERON_ALPHA_RESPONSE	HALLMARK_INTERFERON_ALPHA_RESPONSE	HALLMARK_INTERFERON_ALPHA_RESPONSE	97	-0.632751	-2.36595	1e-10	1e-09	6.94737e-10	7420	tags=45%, list=16%, signal=38%	PROCR/OASL/CSF1/PARP14/UBE2L6/IFI44L/ISG15/IFITM2/SELL/PSMA3/IFITM3/PSME2/SP110/CCRL2/IFITM1/PARP9/PARP12/TDRD7/IFI44/SAMD9L/DDX60/SAMD9/RSAD2/BST2/CASP1/ISG20/IRF9/EPSTI1/IL15/PSMB8/C1S/CD74/TAP1/IL7/HLA-C/CXCL11/WARS1/PSMB9/B2M/IRF1/CXCL10/IFI27/GBP4/GBP2
HALLMARK_INTERFERON_GAMMA_RESPONSE	HALLMARK_INTERFERON_GAMMA_RESPONSE	HALLMARK_INTERFERON_GAMMA_RESPONSE	200	-0.626692	-2.62342	1e-10	1e-09	6.94737e-10	7167	tags=50%, list=16%, signal=42%	ZNFX1/OASL/IFNAR2/PARP14/SPPL2A/UBE2L6/SAMHD1/SLAMF7/IFI44L/PELI1/DDX58/ISG15/RNF213/ST3GAL5/IFITM2/MT2A/JAK2/PSMA3/METTL7B/PTGS2/CD274/IFITM3/PSME2/VCAM1/SP110/IRF5/GCH1/HLA-DMA/PARP12/TDRD7/SOCS3/PSMB10/IFI44/PTPN6/IL15RA/STAT3/FPR1/TNFSF10/ST8SIA4/SOD2/HLA-A/AUTS2/IRF8/TNFAIP2/IL10RA/STAT4/CD86/SAMD9L/DDX60/LCP2/CD69/CFB/CDKN1A/IL2RB/PFKP/RSAD2/CSF2RB/CIITA/HLA-DQA1/XAF1/BST2/FCGR1A/FAS/CASP1/…
HALLMARK_COMPLEMENT	HALLMARK_COMPLEMENT	HALLMARK_COMPLEMENT	199	-0.517646	-2.16502	2.65117e-10	2.20931e-09	1.53489e-09	6840	tags=40%, list=15%, signal=34%	CASP10/CALM1/LYN/DYRK2/DUSP5/CEBPB/S100A13/KCNIP3/CTSC/PLEK/VCPIP1/F8/JAK2/SPOCK2/PIK3CG/F7/DPP4/LTF/USP15/CD36/GATA3/CD40LG/SCG3/CLU/CTSO/PIK3R5/FN1/CTSH/PHEX/WAS/COL4A2/CTSS/APOBEC3G/LGALS3/FCER1G/ZEB1/CPQ/ZFPM2/PRSS3/SERPINC1/SH2B3/KLKB1/DGKH/HPCAL4/C2/ADAM9/LCP2/CFB/KLK1/TFPI2/ERAP2/SERPINE1/C1QA/C3/C1QC/CASP1/C1R/MT3/DOCK4/CR2/C1S/MMP13/GNGT2/LCK/ME1/RASGRP1/DOCK10/CCL5/MMP8/GZMK/PSMB9/SERPI…
HALLMARK_IL2_STAT5_SIGNALING	HALLMARK_IL2_STAT5_SIGNALING	HALLMARK_IL2_STAT5_SIGNALING	198	-0.486035	-2.0322	4.59033e-09	3.27881e-08	2.27791e-08	6514	tags=36%, list=14%, signal=31%	GSTO1/AHR/EOMES/NCS1/NFKBIZ/LRIG1/TTC39B/SELL/WLS/DHRS3/P4HA1/ANXA4/BCL2L1/IL2RA/IL10/SNX14/IFITM3/TRAF1/TNFRSF21/CDCP1/TNFSF11/P2RX4/IFNGR1/IL1RL1/GLIPR2/TLR7/PLAGL1/SCN9A/SERPINC1/TNFSF10/SOCS2/CAPN3/IRF8/ALCAM/ADAM19/SH3BGRL2/MAP3K8/LIF/IL10RA/CD86/GPR65/SLC39A8/CD79B/BATF/ITGA6/BATF3/IL2RB/GPR83/TNFRSF1B/IL18R1/TNFRSF18/F2RL2/GUCY1B1/CCND2/TNFRSF4/IL13/SYT11/SLC2A3/CD48/IL1R2/TNFRSF9/FGL2/CST…
HALLMARK_TNFA_SIGNALING_VIA_NFKB	HALLMARK_TNFA_SIGNALING_VIA_NFKB	HALLMARK_TNFA_SIGNALING_VIA_NFKB	200	-0.436597	-1.82765	3.07171e-06	1.91982e-05	1.33377e-05	8547	tags=39%, list=19%, signal=32%	EDN1/RHOB/DRAM1/FOS/PTX3/ETS2/KLF9/IL12B/B4GALT1/IER5/CSF2/MCL1/KLF2/SLC2A6/CSF1/IL6ST/PANX1/DUSP5/CEBPB/TNC/DDX58/PLEK/NFAT5/ACKR3/EGR2/TNFSF9/PMEPA1/TRIB1/PTGS2/TRAF1/CCRL2/PLPP3/ATP2B1/GCH1/LAMB3/IL7R/SOCS3/CXCL6/FJX1/HES1/SPHK1/IL15RA/FOSL1/PTPRE/SOD2/IL18/TSC22D1/TNFAIP2/MAP3K8/LIF/SGK1/CEBPD/CD69/TNF/CDKN1A/BCL3/SERPINB8/IL1B/SERPINE1/PHLDA2/JAG1/TNFAIP8/SLC2A3/EGR3/BIRC3/TAP1/TNFRSF9/KLF4/…
HALLMARK_KRAS_SIGNALING_UP	HALLMARK_KRAS_SIGNALING_UP	HALLMARK_KRAS_SIGNALING_UP	198	-0.401553	-1.67897	7.24571e-05	0.000402539	0.000279659	7826	tags=36%, list=17%, signal=30%	TNNT2/CSF2/GLRX/ITGB2/MAP4K1/ARG1/GUCY1A1/FBXO4/MTMR10/ANO1/TPH1/ACE/TMEM176B/IKZF1/CSF2RA/TRIB1/PTGS2/HSD11B1/PRDM1/TRAF1/IL1RL2/C3AR1/SCG3/LCP1/ANXA10/LAT2/IL7R/LY96/CTSS/DOCK2/FCER1G/AMMECR1/TMEM176A/MYCN/PCP4/MAFB/AKAP12/LAPTM5/EPHB2/IRF8/PTPRR/HKDC1/LIF/ADGRA2/IL10RA/PRRX1/USH1C/CLEC4A/CFB/CPE/TLR8/IL1B/TNFRSF1B/CCND2/GADD45G/SPARCL1/ITGA2/IL2RG/MMP9/PSMB8/BIRC3/KIF5C/SNAP91/KLF4/SCG5/SERPIN…
HALLMARK_APICAL_JUNCTION	HALLMARK_APICAL_JUNCTION	HALLMARK_APICAL_JUNCTION	198	-0.363841	-1.52129	0.00158028	0.00790142	0.00548941	9773	tags=36%, list=21%, signal=29%	DMP1/CD34/CDK8/LAMA3/MPZL2/KCNH2/BMP1/CLDN14/RAC2/ARHGEF6/CLDN15/ADAM15/MADCAM1/ACTN1/NF1/LAYN/YWHAH/NFASC/ADAMTS5/B4GALT1/PLCG1/COL16A1/SHC1/TGFBI/MSN/RHOF/THY1/NECTIN1/CLDN5/FBN1/ITGA10/CD274/COL17A1/NLGN3/TRAF1/VCAM1/FYB1/CDH6/LAMB3/SLIT2/CLDN18/CDH4/LIMA1/VAV2/EPB41L2/MAP3K20/NEGR1/CADM3/CLDN4/CADM2/ACTA1/ADAM9/CD86/ADAM23/NECTIN3/NRAP/TNFRSF11B/NEXN/ITGA2/CD209/MMP9/NRXN2/SYK/PIK3R3/AMIGO2/A…
HALLMARK_APOPTOSIS	HALLMARK_APOPTOSIS	HALLMARK_APOPTOSIS	161	-0.37913	-1.52722	0.0022285	0.0101295	0.00703735	9484	tags=37%, list=21%, signal=29%	CDKN1B/TGFBR3/CASP8/GNA15/CFLAR/PSEN1/PEA15/RHOB/EREG/F2R/CYLD/CASP4/PLCB2/XIAP/PDGFRB/APP/CASP7/MCL1/DAP/WEE1/BCL2L11/BAX/BCL2L1/IFITM3/CD14/HGF/CLU/IFNGR1/GCH1/CDC25B/DNAJC3/TNFRSF12A/LGALS3/ANXA1/TNFSF10/AVPR1A/SOD2/IL18/TGFB2/CD69/TNF/CDKN1A/IL1B/CCND2/FAS/CASP1/ISG20/EGR3/CCNA1/FEZ1/BIRC3/DPYD/TAP1/FASLG/PRF1/PLPPR4/CD2/IRF1/CD38
HALLMARK_EPITHELIAL_MESENCHYMAL_TRANSITION	HALLMARK_EPITHELIAL_MESENCHYMAL_TRANSITION	HALLMARK_EPITHELIAL_MESENCHYMAL_TRANSITION	199	-0.345364	-1.44446	0.0041351	0.0172296	0.01197	5829	tags=27%, list=13%, signal=24%	FOXC2/THY1/FBN1/CDH2/PMEPA1/LAMC1/SLIT3/VCAM1/COL4A1/RGS4/LGALS1/CDH6/LAMA1/EMP3/FN1/GJA1/MMP3/SPARC/GPC1/TNFRSF12A/CXCL6/SLIT2/COL4A2/EDIL3/SPOCK1/ADAM12/SGCD/ANPEP/OXTR/IGFBP2/ITGA5/PRRX1/ITGB3/TFPI2/SGCG/TNFRSF11B/SERPINE1/MSX1/SGCB/BASP1/ITGA2/FAS/IL32/COL5A3/PTHLH/IL15/COL12A1/THBS2/GEM/HTRA1/CADM1/ECM1/NT5E/AREG
HALLMARK_NOTCH_SIGNALING	HALLMARK_NOTCH_SIGNALING	HALLMARK_NOTCH_SIGNALING	32	-0.530964	-1.62131	0.012406	0.0477155	0.0331497	10747	tags=56%, list=23%, signal=43%	RBX1/CCND1/DTX1/MAML2/WNT5A/CUL1/HEYL/FZD1/NOTCH3/LFNG/FZD5/DLL1/WNT2/FZD7/HES1/PRKCA/JAG1/SAP30
